# Supplementary material for: An integrative TAD catalog in lymphoblastoid cell lines discloses the functional impact of deletions and insertions in human genomes
Source: HighWire-hosted journal article supplement (doi:10.1101/gr.279419.124), 2024-12-01
Supplement: Supplemental_Table_S1.xlsx [file Supplemental_Table_S1.xlsx]

## Sheet: Table S1
Table S1. Summary statistics of the data used in the study
Studies	Samples	population	superpopulation	sex	# lenient boundary	Reads number	below MAPQ=30	Reads number after filter	Hi-C Contacts	Map resolution
HGSVC2	GM12329	CEU	EUR	F	9971	250215126	35592290	214622836	110671276	17800
	HG01114	CLM	AMR	F	9654	363794453	38424995	325369458	155002483	17250
	HG03065	MSL	AFR	M	10200	251761068	30705026	221056042	140374415	15800
	HG01505	IBS	EUR	M	10266	332419793	39592383	292827410	166638090	13900
	HG02492	PJL	SAS	M	10459	313912208	35879811	278032397	188593770	13050
	HG00096	GBR	EUR	M	10795	308753604	34135593	274618011	173960484	12700
	HG03732	ITU	SAS	M	10733	308610605	35922555	272688050	173246838	12400
	HG01573	PEL	AMR	F	10816	321596633	36821603	284775030	186372238	12100
	GM20509	TSI	EUR	M	10552	407953350	42855063	365098287	193720429	11550
	HG02587	GWD	AFR	F	111,88	279280732	35262067	244018665	168958237	11400
	HG01596	KHV	EAS	M	11023	314787633	36186589	278601044	194278700	11300
	GM19833	ASW	AFR	F	10560	311116346	39170774	271945572	197745442	10450
	HG00864	CDX	EAS	F	10691	360151569	36977078	323174491	190866561	10200
	HG02011	ACB	AFR	M	10855	350249928	40660340	309589588	220624233	10100
	HG00733	PUR	AMR	F	10722	360317876	41964998	318352878	223861873	9650
	HG03371	ESN	AFR	M	11214	445442731	50072076	395370655	270409240	9200
	GM19036	LWK	AFR	F	10434	368421024	42470228	325950796	221537472	8650
	GM20847	GIH	SAS	F	10675	450769577	45729228	405040349	236336212	8650
	HG00171	FIN	EUR	F	10564	404514837	43736100	360778737	232622849	8650
	GM18534	CHB	EAS	M	10890	606049776	68513763	537536013	291453191	8500
	GM18939	JPT	EAS	F	10843	444261493	45992363	398269130	238143124	8350
	HG03683	STU	SAS	F	10556	546570732	59514254	487056478	328103171	7850
	GM19240	YRI	AFR	F	11029	454013690	50437961	403575729	274714781	7700
	HG03009	BEB	SAS	M	10774	506300824	57934744	448366080	325714640	7250
	HG02018	KHV	EAS	F	10960	520956942	59424283	461532659	317650940	6200
	HG00514	CHS	EAS	F	10997	589818226	67672052	522146174	357887382	5950
	GM19650	MXL	AMR	M	11225	846623607	98163275	748460332	503396451	4650
HGSVC	HG00512	CHS	EAS	M	6726	453690983	62598459	391092524	319592637	13300
	HG00513	CHS	EAS	F	6763	519165296	67210032	451955264	362747786	12850
	HG00731	PUR	AMR	M	6471	463906788	62446172	401460616	325118371	12300
	HG00732	PUR	AMR	F	6497	540528023	71971069	468556954	385009571	10500
	NA19238	YRI	AFR	F	7277	719517112	99739364	619777748	460264874	10750
	NA19239	YRI	AFR	M	6872	750185985	93389647	656796338	472647837	10950
Hi-C on lymphoblastoid cell lines from 1000G individuals (4DN, Bing Ren)	GM18507	YRI	AFR	M	7038	727283250	86800829	640482421	452071257	10500
	GM18505	YRI	AFR	F	7070	562334209	68615074	493719135	365902024	11250
	GM18508	YRI	AFR	F	7013	597643235	72522681	525120554	388928564	11800
	GM19204	YRI	AFR	F	7150	868174924	104000536	764174388	543241194	9850
	GM18486	YRI	AFR	M	7138	838049367	113828616	724220751	536190581	10550
	GM19193	YRI	AFR	F	6886	429572702	54263409	375309293	293286144	13050
	GM19099	YRI	AFR	F	7256	836021051	113290145	722730906	540760983	10350
	GM19141	YRI	AFR	M	7513	563285250	68158237	495127013	369872501	11800
	GM18516	YRI	AFR	M	7072	555455277	68902572	486552705	370045028	12300
	GM18522	YRI	AFR	M	7460	470902774	57598642	413304132	302479480	14700
