# Supplementary material for: An integrative TAD catalog in lymphoblastoid cell lines discloses the functional impact of deletions and insertions in human genomes
Source: HighWire-hosted journal article supplement (doi:10.1101/gr.279419.124), 2024-12-01
Supplement: Supplemental_Table_S2.xlsx [file Supplemental_Table_S2.xlsx]

## Sheet: Table S2
Table S2. The TAD locations of the Integrative Catalog
chr	TAD_Start	TAD_End
chr1	870000	975000
chr1	980000	1110000
chr1	980000	1305000
chr1	1305000	1370000
chr1	1320000	1510000
chr1	1515000	1620000
chr1	1625000	1695000
chr1	1700000	1745000
chr1	1750000	1915000
chr1	1930000	2045000
chr1	1930000	2150000
chr1	2055000	2190000
chr1	2190000	2385000
chr1	2320000	2405000
chr1	2410000	2530000
chr1	2530000	2585000
chr1	2795000	3425000
chr1	3430000	3490000
chr1	3445000	3825000
chr1	3495000	3620000
chr1	3620000	3740000
chr1	3745000	3910000
chr1	3900000	5445000
chr1	3900000	5845000
chr1	3910000	4610000
chr1	4650000	4845000
chr1	4845000	5385000
chr1	5390000	5495000
chr1	5475000	5975000
chr1	5980000	6060000
chr1	5995000	6485000
chr1	5995000	6645000
chr1	6045000	6190000
chr1	6195000	6240000
chr1	6235000	6440000
chr1	6245000	6335000
chr1	6340000	6425000
chr1	6430000	6480000
chr1	6485000	6550000
chr1	6485000	6665000
chr1	6550000	6640000
chr1	6650000	6700000
chr1	6695000	7660000
chr1	6705000	6785000
chr1	6705000	6905000
chr1	6785000	6895000
chr1	6910000	7225000
chr1	7230000	7650000
chr1	7655000	7765000
chr1	7655000	7945000
chr1	7785000	7925000
chr1	7940000	8875000
chr1	7955000	8025000
chr1	7975000	8345000
chr1	8030000	8230000
chr1	8195000	8355000
chr1	8360000	8555000
chr1	8380000	8860000
chr1	8560000	8725000
chr1	8730000	8875000
chr1	8880000	9000000
chr1	8880000	9230000
chr1	8880000	9580000
chr1	9005000	9105000
chr1	9110000	9275000
chr1	9280000	9475000
chr1	9465000	9490000
chr1	9495000	9590000
chr1	9590000	9870000
chr1	9590000	10460000
chr1	9595000	9720000
chr1	9725000	9770000
chr1	9775000	9870000
chr1	9875000	9945000
chr1	9950000	10030000
chr1	10035000	10170000
chr1	10200000	10355000
chr1	10355000	10425000
chr1	10430000	10500000
chr1	10495000	10960000
chr1	10665000	10940000
chr1	10945000	11015000
chr1	11015000	11270000
chr1	11025000	11775000
chr1	11305000	11640000
chr1	11645000	11735000
chr1	11740000	11800000
chr1	11805000	11905000
chr1	11910000	11985000
chr1	11990000	12110000
chr1	12115000	12230000
chr1	12235000	12685000
chr1	13270000	13435000
chr1	13455000	13655000
chr1	13610000	13970000
chr1	13660000	13820000
chr1	13825000	13970000
chr1	13975000	15105000
chr1	14600000	15055000
chr1	15050000	15110000
chr1	15105000	15495000
chr1	15115000	15305000
chr1	15310000	15445000
chr1	15445000	15520000
chr1	15525000	15620000
chr1	15525000	15755000
chr1	15525000	16060000
chr1	15525000	16500000
chr1	15610000	15745000
chr1	15625000	15675000
chr1	15680000	15795000
chr1	15795000	16000000
chr1	15925000	16000000
chr1	16000000	16070000
chr1	16075000	16190000
chr1	16195000	16245000
chr1	16250000	16360000
chr1	16365000	16500000
chr1	16445000	16545000
chr1	16550000	16620000
chr1	16650000	16740000
chr1	16905000	17055000
chr1	17055000	17125000
chr1	17125000	17245000
chr1	17250000	17400000
chr1	17405000	17495000
chr1	17410000	17625000
chr1	17495000	17610000
chr1	17620000	18845000
chr1	17650000	18105000
chr1	17915000	18095000
chr1	18110000	18585000
chr1	18585000	18875000
chr1	18875000	19245000
chr1	18880000	19070000
chr1	18895000	18975000
chr1	18980000	19065000
chr1	19070000	19250000
chr1	19255000	19335000
chr1	19340000	19385000
chr1	19340000	19650000
chr1	19390000	19490000
chr1	19490000	19590000
chr1	19590000	19650000
chr1	19655000	19715000
chr1	19660000	19845000
chr1	19825000	19880000
chr1	19880000	20505000
chr1	19885000	19910000
chr1	19905000	20190000
chr1	20075000	20210000
chr1	20215000	20495000
chr1	20500000	20655000
chr1	20680000	21195000
chr1	20730000	20785000
chr1	20790000	20960000
chr1	20965000	21195000
chr1	21200000	21375000
chr1	21380000	21495000
chr1	21500000	21665000
chr1	21670000	21790000
chr1	21670000	21990000
chr1	21785000	21980000
chr1	21975000	22015000
chr1	22020000	22115000
chr1	22095000	22960000
chr1	22100000	22660000
chr1	22115000	22400000
chr1	22130000	22310000
chr1	22420000	22530000
chr1	22420000	22650000
chr1	22540000	22625000
chr1	22670000	22965000
chr1	22970000	23090000
chr1	22970000	23275000
chr1	23095000	23185000
chr1	23190000	23280000
chr1	23285000	23470000
chr1	23405000	23480000
chr1	23485000	23545000
chr1	23485000	23755000
chr1	23545000	23640000
chr1	23645000	23770000
chr1	23765000	24035000
chr1	23795000	23925000
chr1	23960000	24050000
chr1	24050000	24145000
chr1	24055000	24635000
chr1	24150000	24195000
chr1	24200000	24390000
chr1	24320000	24395000
chr1	24400000	24635000
chr1	24640000	24750000
chr1	24650000	25230000
chr1	24670000	24835000
chr1	24755000	24840000
chr1	24845000	24920000
chr1	24845000	25220000
chr1	24925000	25040000
chr1	25040000	25105000
chr1	25110000	25220000
chr1	25225000	25340000
chr1	25345000	25400000
chr1	25370000	25815000
chr1	25400000	25520000
chr1	25525000	25610000
chr1	25535000	25810000
chr1	25615000	25690000
chr1	25690000	25810000
chr1	25815000	25895000
chr1	25830000	26020000
chr1	26015000	26090000
chr1	26030000	26170000
chr1	26030000	26435000
chr1	26090000	26165000
chr1	26170000	26240000
chr1	26250000	26425000
chr1	26265000	26345000
chr1	26350000	26430000
chr1	26435000	26470000
chr1	26475000	26580000
chr1	26485000	26895000
chr1	26545000	26600000
chr1	26600000	26690000
chr1	26695000	26790000
chr1	26795000	26895000
chr1	26900000	27025000
chr1	26960000	27290000
chr1	26980000	27725000
chr1	27025000	27100000
chr1	27100000	27290000
chr1	27105000	27195000
chr1	27200000	27290000
chr1	27295000	27400000
chr1	27400000	27605000
chr1	27405000	27495000
chr1	27500000	27600000
chr1	27605000	27670000
chr1	27670000	27840000
chr1	27675000	27725000
chr1	27825000	28235000
chr1	27845000	27985000
chr1	27990000	28080000
chr1	28085000	28240000
chr1	28245000	28365000
chr1	28245000	28640000
chr1	28370000	28505000
chr1	28510000	28580000
chr1	28510000	28635000
chr1	28645000	28770000
chr1	28770000	29220000
chr1	28775000	28880000
chr1	28885000	29045000
chr1	29050000	29230000
chr1	29235000	29350000
chr1	29235000	30710000
chr1	29355000	29875000
chr1	30400000	30685000
chr1	30715000	30790000
chr1	30715000	30930000
chr1	30795000	30920000
chr1	30930000	31070000
chr1	31070000	31160000
chr1	31165000	31255000
chr1	31165000	31420000
chr1	31420000	31550000
chr1	31555000	31640000
chr1	31645000	31795000
chr1	31800000	31970000
chr1	31975000	32070000
chr1	32075000	32100000
chr1	32085000	32185000
chr1	32180000	32390000
chr1	32330000	32405000
chr1	32390000	33095000
chr1	32410000	32515000
chr1	32430000	32810000
chr1	32515000	32650000
chr1	32620000	32690000
chr1	32695000	32780000
chr1	32785000	32875000
chr1	32880000	32925000
chr1	32915000	33090000
chr1	33095000	33185000
chr1	33125000	33490000
chr1	33190000	33280000
chr1	33280000	33475000
chr1	33285000	33375000
chr1	33375000	33480000
chr1	33485000	33630000
chr1	33545000	34760000
chr1	33625000	34760000
chr1	33635000	34195000
chr1	34200000	34455000
chr1	34430000	34690000
chr1	34455000	34595000
chr1	34605000	34755000
chr1	34760000	34860000
chr1	34845000	35810000
chr1	34845000	36070000
chr1	34865000	34980000
chr1	34985000	35185000
chr1	35190000	35295000
chr1	35190000	35370000
chr1	35305000	35440000
chr1	35445000	35560000
chr1	35565000	35640000
chr1	35565000	35775000
chr1	35645000	35715000
chr1	35720000	35780000
chr1	35785000	35875000
chr1	35840000	36080000
chr1	35880000	35930000
chr1	35940000	36020000
chr1	36090000	36140000
chr1	36090000	36300000
chr1	36090000	36460000
chr1	36145000	36215000
chr1	36220000	36300000
chr1	36305000	36465000
chr1	36470000	36565000
chr1	36495000	37440000
chr1	36580000	36705000
chr1	36710000	37340000
chr1	37055000	37410000
chr1	37240000	37325000
chr1	37330000	37435000
chr1	37440000	37560000
chr1	37450000	38000000
chr1	37475000	37695000
chr1	37565000	37595000
chr1	37595000	37690000
chr1	37695000	37795000
chr1	37795000	37870000
chr1	37805000	38005000
chr1	37865000	38005000
chr1	38020000	38840000
chr1	38475000	38595000
chr1	38600000	38835000
chr1	38855000	39085000
chr1	38875000	38985000
chr1	38990000	39095000
chr1	39075000	39735000
chr1	39085000	39570000
chr1	39095000	39265000
chr1	39100000	39180000
chr1	39185000	39265000
chr1	39270000	39465000
chr1	39470000	39555000
chr1	39560000	39660000
chr1	39665000	39725000
chr1	39730000	39805000
chr1	39805000	40040000
chr1	39810000	39905000
chr1	39905000	40040000
chr1	39910000	39975000
chr1	39980000	40045000
chr1	40040000	41000000
chr1	40070000	40145000
chr1	40070000	40420000
chr1	40150000	40295000
chr1	40265000	40330000
chr1	40335000	40415000
chr1	40420000	40535000
chr1	40540000	40600000
chr1	40580000	40975000
chr1	40600000	40680000
chr1	40665000	40855000
chr1	40685000	40765000
chr1	40770000	40855000
chr1	40860000	40975000
chr1	41020000	41470000
chr1	41025000	41240000
chr1	41255000	41510000
chr1	41515000	41565000
chr1	41530000	42040000
chr1	41560000	41890000
chr1	41750000	41805000
chr1	41810000	41890000
chr1	41895000	42040000
chr1	42045000	42170000
chr1	42175000	42335000
chr1	42175000	42760000
chr1	42335000	42760000
chr1	42340000	42460000
chr1	42465000	42560000
chr1	42560000	42760000
chr1	42565000	42650000
chr1	42655000	42760000
chr1	42765000	42890000
chr1	42770000	43100000
chr1	42855000	42910000
chr1	42915000	42965000
chr1	42915000	43080000
chr1	43085000	43155000
chr1	43160000	43225000
chr1	43170000	44055000
chr1	43215000	43440000
chr1	43360000	43520000
chr1	43510000	43705000
chr1	43525000	43640000
chr1	43645000	43755000
chr1	43755000	43940000
chr1	43760000	43870000
chr1	43865000	43935000
chr1	43940000	44060000
chr1	44065000	44205000
chr1	44080000	44660000
chr1	44210000	44380000
chr1	44370000	44720000
chr1	44715000	45005000
chr1	44715000	45500000
chr1	44720000	44835000
chr1	44720000	45305000
chr1	44835000	45005000
chr1	45015000	45295000
chr1	45310000	45580000
chr1	45345000	45490000
chr1	45495000	45585000
chr1	45585000	46245000
chr1	45590000	45685000
chr1	45610000	45890000
chr1	45690000	45810000
chr1	45815000	45870000
chr1	45875000	46030000
chr1	46035000	46185000
chr1	46135000	46185000
chr1	46190000	46240000
chr1	46240000	46365000
chr1	46370000	46550000
chr1	46380000	46730000
chr1	46545000	46600000
chr1	46590000	46730000
chr1	46735000	46875000
chr1	46775000	47165000
chr1	47090000	47170000
chr1	47175000	47260000
chr1	47175000	47385000
chr1	47380000	47440000
chr1	47440000	47725000
chr1	47715000	47985000
chr1	47980000	48100000
chr1	48090000	48240000
chr1	48210000	48245000
chr1	48250000	48530000
chr1	48535000	48695000
chr1	48540000	48875000
chr1	48700000	48825000
chr1	48830000	50340000
chr1	50345000	50435000
chr1	50350000	51230000
chr1	50355000	50725000
chr1	50360000	50625000
chr1	50605000	50740000
chr1	50745000	50865000
chr1	50750000	51200000
chr1	50765000	51065000
chr1	50870000	50995000
chr1	51065000	51190000
chr1	51195000	51300000
chr1	51305000	51410000
chr1	51320000	51835000
chr1	51345000	51540000
chr1	51535000	51620000
chr1	51570000	51780000
chr1	51775000	51885000
chr1	51890000	52025000
chr1	52030000	52135000
chr1	52030000	53205000
chr1	52105000	52360000
chr1	52365000	52405000
chr1	52400000	52685000
chr1	52555000	52690000
chr1	52695000	52830000
chr1	52835000	52920000
chr1	52925000	53055000
chr1	53060000	53185000
chr1	53190000	53245000
chr1	53240000	53765000
chr1	53250000	53410000
chr1	53455000	53750000
chr1	53760000	53835000
chr1	53835000	54880000
chr1	53840000	53960000
chr1	53965000	54090000
chr1	54095000	54505000
chr1	54410000	54490000
chr1	54495000	54665000
chr1	54540000	54850000
chr1	54665000	54815000
chr1	54820000	55060000
chr1	55065000	55130000
chr1	55080000	55280000
chr1	55135000	55275000
chr1	55215000	55280000
chr1	55285000	55375000
chr1	55345000	56720000
chr1	55925000	56620000
chr1	56030000	56170000
chr1	56405000	56580000
chr1	56590000	56830000
chr1	56720000	56820000
chr1	56820000	58265000
chr1	58055000	58170000
chr1	58170000	58490000
chr1	58495000	58670000
chr1	58660000	58700000
chr1	58700000	59780000
chr1	58705000	58730000
chr1	58735000	58775000
chr1	58735000	59290000
chr1	58780000	58900000
chr1	58780000	59050000
chr1	58905000	59020000
chr1	59055000	59145000
chr1	59150000	59290000
chr1	59295000	59705000
chr1	59700000	59765000
chr1	59770000	59955000
chr1	59865000	59965000
chr1	59955000	61650000
chr1	59970000	60810000
chr1	60275000	60730000
chr1	60875000	61905000
chr1	61045000	61455000
chr1	61195000	61455000
chr1	61240000	61350000
chr1	61460000	61640000
chr1	61645000	61855000
chr1	61860000	62140000
chr1	62070000	62155000
chr1	62160000	62430000
chr1	62435000	62500000
chr1	62435000	62785000
chr1	62695000	62750000
chr1	62780000	62845000
chr1	62850000	63300000
chr1	62860000	63545000
chr1	63160000	63360000
chr1	63315000	63545000
chr1	63365000	63450000
chr1	63455000	63525000
chr1	63530000	63615000
chr1	63595000	64840000
chr1	63605000	64255000
chr1	63620000	63685000
chr1	63670000	63920000
chr1	63925000	64130000
chr1	64135000	64255000
chr1	64265000	64655000
chr1	64265000	64825000
chr1	64675000	64825000
chr1	64830000	65040000
chr1	64970000	65060000
chr1	65065000	65140000
chr1	65065000	65225000
chr1	65140000	65215000
chr1	65230000	65420000
chr1	65230000	65690000
chr1	65425000	65670000
chr1	65600000	65685000
chr1	65690000	65950000
chr1	65705000	66730000
chr1	65955000	66240000
chr1	66245000	66345000
chr1	66245000	66450000
chr1	66455000	66730000
chr1	66735000	66920000
chr1	66740000	67780000
chr1	66925000	66990000
chr1	66925000	67515000
chr1	66980000	67210000
chr1	66990000	67145000
chr1	66995000	67045000
chr1	67145000	67220000
chr1	67215000	67505000
chr1	67225000	67340000
chr1	67345000	67425000
chr1	67430000	67520000
chr1	67530000	67770000
chr1	67550000	67670000
chr1	67675000	67765000
chr1	67765000	67850000
chr1	67850000	68110000
chr1	68115000	68355000
chr1	68360000	68450000
chr1	68455000	68510000
chr1	68515000	70125000
chr1	68685000	69190000
chr1	69805000	70090000
chr1	70130000	70215000
chr1	70130000	70510000
chr1	70200000	70510000
chr1	70220000	70350000
chr1	70355000	70420000
chr1	70425000	70520000
chr1	70525000	71055000
chr1	71055000	71090000
chr1	71095000	72075000
chr1	71915000	72285000
chr1	72115000	72555000
chr1	72290000	72355000
chr1	72360000	73125000
chr1	72620000	73670000
chr1	73130000	74755000
chr1	73820000	74005000
chr1	74015000	74710000
chr1	74475000	74760000
chr1	74765000	75220000
chr1	75225000	75430000
chr1	75240000	75640000
chr1	75640000	75715000
chr1	75720000	75805000
chr1	75810000	75905000
chr1	75890000	76150000
chr1	75905000	75995000
chr1	76115000	77125000
chr1	76140000	76865000
chr1	76155000	76330000
chr1	76870000	77100000
chr1	77140000	77225000
chr1	77145000	77535000
chr1	77540000	77685000
chr1	77560000	78115000
chr1	77690000	77925000
chr1	77930000	78005000
chr1	78005000	78140000
chr1	78140000	78600000
chr1	78145000	78325000
chr1	78605000	78685000
chr1	78690000	78835000
chr1	78840000	79500000
chr1	79495000	79875000
chr1	79505000	80915000
chr1	79590000	79835000
chr1	80240000	81115000
chr1	80435000	80815000
chr1	80920000	81400000
chr1	81370000	81795000
chr1	81405000	81550000
chr1	81550000	81760000
chr1	81790000	83275000
chr1	82020000	82360000
chr1	83280000	83390000
chr1	83285000	83890000
chr1	83895000	84000000
chr1	83895000	84780000
chr1	83905000	84130000
chr1	84005000	84070000
chr1	84060000	84775000
chr1	84075000	84135000
chr1	84140000	84430000
chr1	84300000	84435000
chr1	84435000	84755000
chr1	84440000	84620000
chr1	84575000	84625000
chr1	84630000	84765000
chr1	84770000	84935000
chr1	84935000	85275000
chr1	84940000	85090000
chr1	85120000	85260000
chr1	85290000	86335000
chr1	85300000	85570000
chr1	85320000	85510000
chr1	85570000	85710000
chr1	85710000	86085000
chr1	85715000	85885000
chr1	85890000	86025000
chr1	86030000	86355000
chr1	86350000	86675000
chr1	86360000	86510000
chr1	86515000	86675000
chr1	86660000	86695000
chr1	86700000	86745000
chr1	86750000	86835000
chr1	86830000	87090000
chr1	86835000	86915000
chr1	86920000	87020000
chr1	87025000	87110000
chr1	87115000	87325000
chr1	87115000	88600000
chr1	87125000	88060000
chr1	87310000	87790000
chr1	87330000	87500000
chr1	87795000	87955000
chr1	87960000	88165000
chr1	88160000	88645000
chr1	88645000	88885000
chr1	88660000	90015000
chr1	88890000	88980000
chr1	88895000	90005000
chr1	88970000	89455000
chr1	88985000	89080000
chr1	89085000	89195000
chr1	89200000	89270000
chr1	89275000	89355000
chr1	89360000	89475000
chr1	89475000	89780000
chr1	89480000	89620000
chr1	89480000	90015000
chr1	89625000	89770000
chr1	89775000	90000000
chr1	90005000	90035000
chr1	90040000	90695000
chr1	90695000	91175000
chr1	90700000	90845000
chr1	90845000	91165000
chr1	90910000	91020000
chr1	91025000	91170000
chr1	91175000	91275000
chr1	91250000	91480000
chr1	91285000	91395000
chr1	91500000	91925000
chr1	91805000	91935000
chr1	91940000	92295000
chr1	91990000	92760000
chr1	92295000	92625000
chr1	92300000	92460000
chr1	92465000	92610000
chr1	92615000	92815000
chr1	92735000	92835000
chr1	92830000	93250000
chr1	92840000	92995000
chr1	92960000	93005000
chr1	93010000	93080000
chr1	93075000	93250000
chr1	93080000	93175000
chr1	93185000	93370000
chr1	93375000	93430000
chr1	93375000	93895000
chr1	93435000	93620000
chr1	93615000	93840000
chr1	93755000	93840000
chr1	93845000	93910000
chr1	93915000	94025000
chr1	93950000	95070000
chr1	93995000	94380000
chr1	94345000	94405000
chr1	94410000	94480000
chr1	94485000	94815000
chr1	94815000	95065000
chr1	95070000	95235000
chr1	95240000	96225000
chr1	96225000	96710000
chr1	96715000	96840000
chr1	96845000	96955000
chr1	96960000	97130000
chr1	96960000	98060000
chr1	97120000	97615000
chr1	97245000	97545000
chr1	97540000	97815000
chr1	97820000	97925000
chr1	97930000	98055000
chr1	98060000	99170000
chr1	98090000	98530000
chr1	98740000	99720000
chr1	98765000	99115000
chr1	99140000	99710000
chr1	99175000	99475000
chr1	99485000	99705000
chr1	99710000	99805000
chr1	99745000	100455000
chr1	99745000	100890000
chr1	99775000	100130000
chr1	99805000	100035000
chr1	99860000	99965000
chr1	99970000	100035000
chr1	100035000	100135000
chr1	100140000	100265000
chr1	100260000	100455000
chr1	100265000	100350000
chr1	100360000	100450000
chr1	100460000	100545000
chr1	100545000	100890000
chr1	100895000	101020000
chr1	100895000	101460000
chr1	101025000	101125000
chr1	101130000	101240000
chr1	101245000	101295000
chr1	101295000	101455000
chr1	101300000	101365000
chr1	101460000	101505000
chr1	101510000	101595000
chr1	101515000	102465000
chr1	101600000	103515000
chr1	102515000	102965000
chr1	103060000	103515000
chr1	103120000	103445000
chr1	103520000	103565000
chr1	103570000	103620000
chr1	103940000	104645000
chr1	104585000	105915000
chr1	104595000	105740000
chr1	104595000	105820000
chr1	104630000	105045000
chr1	104650000	104785000
chr1	105035000	107180000
chr1	107060000	107145000
chr1	107150000	107555000
chr1	107420000	107535000
chr1	107540000	107775000
chr1	107775000	108135000
chr1	107785000	107980000
chr1	107975000	108135000
chr1	108140000	108200000
chr1	108505000	108570000
chr1	108580000	108650000
chr1	108655000	108690000
chr1	108695000	108750000
chr1	108755000	108810000
chr1	108775000	109110000
chr1	108815000	108905000
chr1	108910000	109035000
chr1	109040000	109105000
chr1	109110000	109205000
chr1	109210000	109260000
chr1	109230000	109480000
chr1	109260000	109400000
chr1	109405000	109480000
chr1	109485000	109545000
chr1	109540000	110030000
chr1	109545000	109635000
chr1	109640000	109775000
chr1	109780000	109985000
chr1	109790000	109900000
chr1	109990000	110030000
chr1	110035000	110165000
chr1	110130000	110195000
chr1	110185000	110495000
chr1	110200000	110325000
chr1	110330000	110405000
chr1	110410000	110500000
chr1	110505000	110615000
chr1	110515000	110780000
chr1	110620000	110680000
chr1	110620000	110775000
chr1	110780000	110870000
chr1	110785000	111000000
chr1	110875000	110970000
chr1	110975000	111025000
chr1	111020000	111435000
chr1	111030000	111125000
chr1	111130000	111225000
chr1	111225000	111435000
chr1	111345000	111445000
chr1	111450000	111500000
chr1	111465000	111765000
chr1	111505000	111580000
chr1	111585000	111655000
chr1	111660000	111695000
chr1	111700000	111775000
chr1	111780000	112375000
chr1	112370000	112710000
chr1	112380000	112475000
chr1	112475000	112610000
chr1	112615000	112710000
chr1	112715000	112805000
chr1	112715000	112865000
chr1	112715000	113080000
chr1	112815000	112875000
chr1	112880000	113060000
chr1	113070000	113135000
chr1	113125000	113675000
chr1	113140000	113350000
chr1	113460000	113595000
chr1	113680000	113815000
chr1	113720000	113975000
chr1	113950000	114760000
chr1	113980000	114335000
chr1	114335000	114755000
chr1	114340000	114575000
chr1	114520000	114580000
chr1	114585000	114675000
chr1	114700000	114785000
chr1	114790000	114955000
chr1	114960000	115115000
chr1	115055000	115125000
chr1	115130000	115265000
chr1	115135000	115580000
chr1	115255000	115480000
chr1	115475000	115600000
chr1	115600000	115775000
chr1	115605000	115705000
chr1	115710000	115785000
chr1	115790000	115990000
chr1	115980000	116130000
chr1	116130000	116500000
chr1	116155000	116335000
chr1	116355000	116490000
chr1	116360000	116425000
chr1	116430000	116495000
chr1	116500000	116570000
chr1	116570000	116725000
chr1	116570000	117060000
chr1	116730000	116825000
chr1	116825000	116990000
chr1	116995000	117055000
chr1	117060000	117130000
chr1	117135000	117345000
chr1	117140000	117930000
chr1	117350000	117510000
chr1	117515000	117595000
chr1	117525000	117690000
chr1	117595000	117680000
chr1	117685000	117760000
chr1	117765000	117975000
chr1	117980000	118145000
chr1	118045000	119035000
chr1	118835000	119005000
chr1	118890000	119000000
chr1	119020000	119140000
chr1	119145000	119270000
chr1	119270000	119375000
chr1	119380000	119540000
chr1	119545000	119600000
chr1	119550000	119755000
chr1	119605000	119685000
chr1	119690000	119950000
chr1	119955000	120045000
chr1	120070000	120140000
chr1	120145000	120210000
chr1	120405000	120440000
chr1	120445000	120485000
chr1	120490000	120755000
chr1	120760000	120840000
chr1	120845000	120940000
chr1	120945000	121035000
chr1	121040000	121105000
chr1	121110000	121160000
chr1	121165000	121240000
chr1	121245000	121285000
chr1	121290000	121315000
chr1	121320000	121360000
chr1	124855000	124920000
chr1	124925000	125065000
chr1	143535000	143870000
chr1	143765000	143800000
chr1	143805000	143860000
chr1	143890000	143965000
chr1	145000000	145180000
chr1	145510000	145580000
chr1	145585000	145720000
chr1	145725000	145825000
chr1	145830000	145915000
chr1	145830000	146035000
chr1	145920000	145960000
chr1	145965000	146050000
chr1	146375000	146445000
chr1	146450000	146510000
chr1	146515000	146560000
chr1	146565000	146640000
chr1	146675000	146760000
chr1	146765000	146870000
chr1	146895000	146940000
chr1	146945000	146975000
chr1	146980000	147095000
chr1	147100000	147160000
chr1	147165000	147250000
chr1	147255000	147465000
chr1	147465000	147910000
chr1	147490000	147655000
chr1	147500000	147595000
chr1	147600000	147645000
chr1	147700000	147890000
chr1	147930000	148080000
chr1	148085000	148190000
chr1	148195000	148225000
chr1	148230000	148280000
chr1	148285000	148330000
chr1	148335000	148400000
chr1	148405000	148465000
chr1	148470000	148515000
chr1	148915000	148985000
chr1	148990000	149080000
chr1	149085000	149120000
chr1	149135000	149185000
chr1	149425000	149445000
chr1	149645000	149700000
chr1	149705000	149730000
chr1	149735000	149810000
chr1	149815000	149890000
chr1	149885000	150220000
chr1	149890000	150060000
chr1	149895000	149950000
chr1	149955000	150060000
chr1	150070000	150180000
chr1	150185000	150230000
chr1	150235000	150325000
chr1	150235000	151005000
chr1	150240000	150540000
chr1	150330000	150360000
chr1	150365000	150450000
chr1	150455000	150550000
chr1	150555000	150630000
chr1	150555000	150980000
chr1	150635000	150750000
chr1	150755000	150825000
chr1	150830000	150930000
chr1	150935000	150980000
chr1	151005000	151075000
chr1	151005000	151165000
chr1	151075000	151160000
chr1	151170000	151275000
chr1	151280000	151340000
chr1	151280000	151430000
chr1	151430000	151855000
chr1	151435000	151535000
chr1	151540000	151595000
chr1	151600000	151740000
chr1	151745000	151840000
chr1	151845000	151875000
chr1	151875000	152045000
chr1	152050000	152190000
chr1	152050000	152470000
chr1	152130000	152190000
chr1	152200000	152455000
chr1	152465000	152560000
chr1	152565000	152640000
chr1	152620000	153300000
chr1	152645000	152850000
chr1	152855000	152940000
chr1	152945000	153220000
chr1	153220000	153290000
chr1	153295000	153345000
chr1	153350000	153495000
chr1	153500000	153565000
chr1	153500000	153630000
chr1	153575000	153665000
chr1	153640000	154005000
chr1	153665000	153790000
chr1	153795000	153985000
chr1	153995000	154175000
chr1	154175000	154270000
chr1	154275000	154335000
chr1	154340000	154395000
chr1	154340000	154470000
chr1	154340000	154550000
chr1	154475000	154555000
chr1	154560000	154665000
chr1	154560000	154945000
chr1	154670000	154750000
chr1	154680000	154880000
chr1	154755000	154870000
chr1	154880000	154935000
chr1	154940000	155085000
chr1	155090000	155175000
chr1	155180000	155245000
chr1	155195000	156070000
chr1	155245000	155330000
chr1	155330000	155595000
chr1	155495000	155605000
chr1	155610000	155745000
chr1	155745000	155850000
chr1	155745000	156070000
chr1	155855000	155915000
chr1	155910000	156070000
chr1	155930000	155990000
chr1	156005000	156070000
chr1	156075000	156145000
chr1	156080000	156245000
chr1	156080000	156330000
chr1	156145000	156225000
chr1	156230000	156340000
chr1	156345000	156455000
chr1	156350000	156615000
chr1	156455000	156605000
chr1	156615000	156720000
chr1	156660000	156895000
chr1	156715000	156895000
chr1	156725000	156785000
chr1	156790000	156885000
chr1	156895000	157075000
chr1	157075000	157170000
chr1	157160000	157960000
chr1	157180000	157500000
chr1	157190000	157350000
chr1	157370000	157490000
chr1	157495000	157575000
chr1	157560000	157865000
chr1	157580000	157700000
chr1	157705000	157770000
chr1	157770000	157865000
chr1	157870000	157955000
chr1	157960000	158130000
chr1	158135000	158190000
chr1	158165000	158495000
chr1	158165000	159100000
chr1	158195000	158355000
chr1	158365000	159010000
chr1	158505000	159095000
chr1	158775000	159000000
chr1	158785000	158850000
chr1	159000000	159085000
chr1	159090000	159225000
chr1	159130000	159900000
chr1	159130000	160020000
chr1	159235000	159755000
chr1	159780000	159905000
chr1	159780000	160025000
chr1	159925000	160020000
chr1	160025000	160095000
chr1	160095000	160375000
chr1	160100000	160180000
chr1	160170000	160330000
chr1	160185000	160255000
chr1	160290000	160420000
chr1	160425000	160540000
chr1	160425000	160610000
chr1	160545000	160610000
chr1	160615000	160675000
chr1	160675000	160985000
chr1	160680000	160830000
chr1	160780000	160835000
chr1	160835000	160985000
chr1	160990000	161155000
chr1	161160000	161215000
chr1	161185000	161385000
chr1	161215000	161305000
chr1	161310000	161385000
chr1	161390000	161445000
chr1	161450000	161550000
chr1	161555000	161650000
chr1	161655000	161750000
chr1	161780000	162040000
chr1	161780000	162490000
chr1	161785000	161925000
chr1	161965000	162050000
chr1	162050000	162415000
chr1	162400000	162490000
chr1	162495000	162565000
chr1	162570000	162610000
chr1	162605000	162845000
chr1	162845000	163325000
chr1	163355000	163530000
chr1	163375000	165080000
chr1	163455000	164545000
chr1	164805000	165365000
chr1	164825000	165075000
chr1	165175000	165590000
chr1	165245000	166830000
chr1	165325000	166830000
chr1	165380000	165590000
chr1	165595000	165700000
chr1	165600000	165920000
chr1	165705000	165760000
chr1	165765000	165825000
chr1	165825000	165925000
chr1	165930000	166190000
chr1	165930000	166495000
chr1	166500000	166830000
chr1	166835000	166880000
chr1	166850000	167555000
chr1	166850000	167705000
chr1	166885000	167055000
chr1	167060000	167135000
chr1	167065000	167210000
chr1	167140000	167215000
chr1	167220000	167550000
chr1	167225000	167375000
chr1	167395000	167440000
chr1	167440000	167550000
chr1	167555000	167710000
chr1	167715000	167805000
chr1	167715000	168085000
chr1	167810000	167920000
chr1	167925000	168075000
chr1	168080000	168145000
chr1	168170000	168235000
chr1	168240000	168335000
chr1	168340000	168430000
chr1	168435000	168595000
chr1	168600000	169365000
chr1	168910000	169120000
chr1	169015000	169110000
chr1	169115000	169360000
chr1	169365000	169545000
chr1	169460000	169545000
chr1	169550000	169585000
chr1	169590000	169715000
chr1	169715000	169795000
chr1	169800000	169925000
chr1	169895000	170945000
chr1	169915000	170675000
chr1	169930000	170080000
chr1	170095000	170495000
chr1	170520000	170670000
chr1	170670000	170935000
chr1	170955000	171365000
chr1	170955000	171415000
chr1	171225000	171320000
chr1	171325000	171475000
chr1	171480000	171645000
chr1	171640000	171730000
chr1	171640000	171785000
chr1	171735000	171795000
chr1	171800000	171990000
chr1	171995000	172085000
chr1	172085000	172410000
chr1	172090000	172185000
chr1	172190000	172265000
chr1	172270000	172330000
chr1	172335000	172410000
chr1	172415000	172440000
chr1	172445000	172530000
chr1	172445000	172725000
chr1	172535000	172605000
chr1	172605000	172730000
chr1	172630000	174080000
chr1	172725000	173845000
chr1	172735000	172830000
chr1	172740000	173195000
chr1	173200000	173415000
chr1	173420000	173495000
chr1	173430000	173705000
chr1	173710000	173820000
chr1	173825000	173860000
chr1	173845000	174230000
chr1	173865000	173930000
chr1	173935000	174015000
chr1	174020000	174085000
chr1	174090000	174150000
chr1	174090000	174225000
chr1	174155000	174225000
chr1	174255000	174740000
chr1	174745000	174995000
chr1	174880000	175020000
chr1	175020000	175350000
chr1	175025000	175145000
chr1	175030000	176240000
chr1	175150000	175235000
chr1	175155000	175320000
chr1	175240000	175325000
chr1	175325000	176250000
chr1	175330000	175475000
chr1	175365000	175895000
chr1	175470000	175760000
chr1	175895000	176075000
chr1	175940000	176225000
chr1	176080000	176215000
chr1	176220000	176365000
chr1	176365000	176885000
chr1	176370000	176535000
chr1	176555000	176690000
chr1	176890000	176960000
chr1	176890000	177985000
chr1	176895000	177195000
chr1	177235000	177945000
chr1	177430000	177880000
chr1	177775000	177940000
chr1	177945000	178290000
chr1	178295000	178360000
chr1	178295000	178530000
chr1	178295000	179030000
chr1	178295000	179620000
chr1	178295000	179845000
chr1	178500000	179410000
chr1	178525000	179020000
chr1	178535000	178605000
chr1	178535000	178750000
chr1	178610000	178660000
chr1	178665000	178760000
chr1	178765000	179010000
chr1	179015000	179080000
chr1	179070000	179375000
chr1	179080000	179225000
chr1	179230000	179290000
chr1	179295000	179375000
chr1	179380000	179830000
chr1	179690000	179835000
chr1	179840000	179950000
chr1	179850000	180175000
chr1	179955000	180025000
chr1	180030000	180100000
chr1	180105000	180185000
chr1	180190000	180250000
chr1	180250000	180505000
chr1	180500000	181175000
chr1	180510000	180630000
chr1	180515000	180860000
chr1	180635000	180770000
chr1	180775000	180865000
chr1	180870000	181020000
chr1	180875000	181170000
chr1	181020000	181160000
chr1	181025000	181075000
chr1	181085000	181145000
chr1	181180000	181425000
chr1	181185000	182065000
chr1	181430000	181475000
chr1	181450000	182055000
chr1	181475000	181680000
chr1	181680000	181935000
chr1	181810000	181930000
chr1	181940000	182070000
chr1	182075000	182125000
chr1	182080000	182400000
chr1	182135000	182225000
chr1	182400000	182440000
chr1	182440000	182585000
chr1	182590000	182785000
chr1	182790000	182835000
chr1	182840000	182900000
chr1	182885000	183455000
chr1	182905000	182955000
chr1	182935000	183240000
chr1	182960000	183015000
chr1	183020000	183110000
chr1	183265000	183330000
chr1	183320000	183460000
chr1	183460000	183630000
chr1	183465000	183560000
chr1	183555000	183640000
chr1	183645000	183920000
chr1	183805000	183920000
chr1	183925000	184070000
chr1	184065000	184690000
chr1	184075000	184235000
chr1	184265000	184685000
chr1	184570000	184670000
chr1	184690000	184755000
chr1	184715000	185170000
chr1	184760000	184800000
chr1	184800000	184980000
chr1	184985000	185040000
chr1	185020000	185170000
chr1	185175000	185305000
chr1	185310000	185440000
chr1	185310000	185700000
chr1	185705000	186280000
chr1	186145000	186220000
chr1	186300000	186400000
chr1	186375000	187000000
chr1	186405000	186480000
chr1	186485000	186600000
chr1	186605000	186690000
chr1	186695000	186990000
chr1	186715000	186815000
chr1	186820000	186920000
chr1	186925000	186995000
chr1	187000000	188745000
chr1	187905000	188150000
chr1	187925000	188025000
chr1	187925000	189200000
chr1	189205000	191130000
chr1	190510000	192445000
chr1	190600000	191790000
chr1	190660000	191830000
chr1	190920000	191395000
chr1	192450000	193045000
chr1	192465000	192620000
chr1	192625000	192800000
chr1	192805000	193020000
chr1	193025000	193130000
chr1	193145000	193400000
chr1	193165000	193285000
chr1	193280000	194345000
chr1	193400000	193620000
chr1	194305000	196140000
chr1	194665000	194970000
chr1	195065000	195375000
chr1	196100000	196745000
chr1	196140000	196310000
chr1	196720000	197415000
chr1	196750000	196835000
chr1	196770000	197070000
chr1	197075000	197140000
chr1	197100000	197205000
chr1	197205000	197505000
chr1	197510000	197930000
chr1	197935000	198070000
chr1	198075000	198150000
chr1	198075000	198715000
chr1	198145000	198355000
chr1	198275000	198360000
chr1	198365000	198465000
chr1	198470000	198595000
chr1	198505000	198695000
chr1	198600000	198690000
chr1	198695000	198765000
chr1	198760000	199250000
chr1	198770000	198925000
chr1	198930000	199105000
chr1	199110000	199160000
chr1	199165000	199250000
chr1	199255000	200535000
chr1	199280000	199555000
chr1	200120000	200525000
chr1	200130000	200270000
chr1	200275000	200510000
chr1	200410000	200495000
chr1	200500000	200615000
chr1	200545000	201065000
chr1	200545000	201125000
chr1	200555000	200830000
chr1	200610000	200810000
chr1	200620000	200670000
chr1	200675000	200735000
chr1	200740000	200805000
chr1	200830000	200895000
chr1	200890000	201125000
chr1	200900000	200965000
chr1	200970000	201055000
chr1	201060000	201135000
chr1	201140000	201240000
chr1	201225000	201880000
chr1	201240000	201410000
chr1	201365000	201430000
chr1	201430000	201545000
chr1	201540000	201810000
chr1	201555000	201690000
chr1	201705000	201815000
chr1	201820000	201875000
chr1	201845000	202150000
chr1	201870000	201990000
chr1	201995000	202135000
chr1	202140000	202180000
chr1	202175000	202335000
chr1	202340000	202450000
chr1	202455000	202625000
chr1	202585000	202630000
chr1	202635000	202720000
chr1	202730000	202875000
chr1	202730000	203005000
chr1	202885000	203030000
chr1	203025000	203790000
chr1	203035000	203260000
chr1	203260000	203490000
chr1	203265000	203345000
chr1	203345000	203485000
chr1	203500000	203800000
chr1	203505000	203595000
chr1	203600000	203705000
chr1	203710000	203825000
chr1	203800000	203870000
chr1	203860000	204375000
chr1	203875000	204130000
chr1	204145000	204220000
chr1	204145000	204375000
chr1	204400000	204545000
chr1	204410000	204830000
chr1	204515000	204570000
chr1	204565000	204810000
chr1	204820000	204955000
chr1	204960000	205070000
chr1	204960000	205260000
chr1	205075000	205130000
chr1	205135000	205260000
chr1	205260000	205345000
chr1	205265000	205525000
chr1	205355000	205510000
chr1	205495000	205525000
chr1	205530000	205580000
chr1	205570000	205745000
chr1	205580000	205655000
chr1	205660000	205780000
chr1	205780000	205970000
chr1	205790000	205910000
chr1	205915000	205980000
chr1	205980000	206180000
chr1	206200000	206240000
chr1	206255000	206290000
chr1	206300000	206350000
chr1	206355000	206460000
chr1	206465000	206605000
chr1	206605000	206725000
chr1	206605000	207005000
chr1	206730000	206815000
chr1	206820000	206910000
chr1	206910000	206990000
chr1	206995000	207085000
chr1	207075000	207520000
chr1	207090000	207310000
chr1	207310000	207405000
chr1	207405000	207505000
chr1	207535000	207580000
chr1	207575000	207705000
chr1	207710000	207805000
chr1	207810000	207880000
chr1	207810000	207980000
chr1	207885000	207980000
chr1	207995000	209745000
chr1	208000000	208120000
chr1	208000000	209550000
chr1	208010000	208265000
chr1	208110000	209710000
chr1	208125000	208250000
chr1	208255000	208650000
chr1	208460000	209710000
chr1	208655000	209055000
chr1	209060000	209200000
chr1	209205000	209250000
chr1	209265000	209535000
chr1	209355000	209540000
chr1	209560000	209625000
chr1	209565000	209750000
chr1	209630000	209690000
chr1	209695000	209750000
chr1	209755000	209850000
chr1	209845000	211245000
chr1	209850000	210325000
chr1	209850000	210400000
chr1	209855000	210040000
chr1	209920000	210325000
chr1	210135000	210315000
chr1	210315000	210410000
chr1	210410000	211210000
chr1	210415000	210580000
chr1	210445000	211160000
chr1	210585000	210655000
chr1	211135000	211255000
chr1	211260000	211315000
chr1	211260000	211660000
chr1	211320000	211390000
chr1	211395000	211510000
chr1	211515000	211575000
chr1	211515000	211665000
chr1	211575000	211655000
chr1	211665000	212455000
chr1	211680000	211830000
chr1	211680000	212030000
chr1	211830000	211930000
chr1	211830000	211995000
chr1	211940000	212045000
chr1	212060000	212285000
chr1	212290000	212365000
chr1	212310000	212455000
chr1	212365000	212455000
chr1	212460000	213070000
chr1	212470000	212630000
chr1	212480000	212550000
chr1	212560000	212620000
chr1	212625000	212660000
chr1	212655000	212790000
chr1	212790000	212870000
chr1	212795000	213005000
chr1	213005000	213115000
chr1	213120000	213240000
chr1	213185000	214670000
chr1	213235000	214165000
chr1	213245000	213365000
chr1	214195000	214250000
chr1	214205000	214640000
chr1	214210000	214335000
chr1	214600000	214670000
chr1	214675000	215545000
chr1	214745000	215125000
chr1	214895000	215085000
chr1	215530000	215630000
chr1	215635000	218190000
chr1	215705000	216225000
chr1	216300000	216585000
chr1	216760000	217805000
chr1	216930000	217335000
chr1	217430000	217660000
chr1	217665000	217970000
chr1	217780000	218185000
chr1	217975000	218040000
chr1	218045000	218275000
chr1	218260000	219815000
chr1	218280000	218335000
chr1	218330000	218540000
chr1	218535000	219055000
chr1	218930000	219585000
chr1	219060000	219180000
chr1	219185000	219390000
chr1	219395000	219575000
chr1	219580000	219655000
chr1	219660000	219820000
chr1	219825000	219960000
chr1	219940000	220800000
chr1	219965000	220175000
chr1	220110000	220210000
chr1	220210000	220285000
chr1	220290000	220530000
chr1	220290000	220790000
chr1	220340000	220530000
chr1	220670000	220805000
chr1	220810000	220870000
chr1	220855000	221215000
chr1	220875000	221030000
chr1	221035000	221210000
chr1	221215000	221440000
chr1	221445000	221710000
chr1	221465000	222080000
chr1	221715000	221845000
chr1	221735000	222015000
chr1	222015000	222095000
chr1	222100000	222185000
chr1	222185000	222460000
chr1	222460000	222640000
chr1	222525000	222640000
chr1	222645000	222725000
chr1	222645000	223135000
chr1	222730000	222820000
chr1	222735000	223105000
chr1	223090000	223125000
chr1	223125000	223260000
chr1	223265000	223490000
chr1	223690000	223770000
chr1	223775000	223915000
chr1	223920000	223960000
chr1	223965000	224110000
chr1	224105000	224460000
chr1	224335000	224510000
chr1	224505000	224925000
chr1	224515000	224695000
chr1	224555000	224860000
chr1	224700000	224850000
chr1	224860000	224930000
chr1	224935000	225475000
chr1	225465000	225975000
chr1	225475000	225755000
chr1	225770000	225975000
chr1	225920000	225985000
chr1	225985000	226115000
chr1	226065000	226120000
chr1	226120000	226400000
chr1	226125000	226200000
chr1	226200000	226395000
chr1	226315000	226410000
chr1	226410000	226895000
chr1	226415000	226610000
chr1	226545000	226620000
chr1	226625000	226835000
chr1	226735000	226830000
chr1	226835000	227000000
chr1	227005000	227465000
chr1	227460000	227960000
chr1	227470000	227540000
chr1	227545000	227720000
chr1	227725000	227790000
chr1	227755000	227970000
chr1	227975000	228075000
chr1	228080000	228200000
chr1	228180000	228555000
chr1	228205000	228370000
chr1	228375000	228455000
chr1	228460000	228505000
chr1	228645000	229545000
chr1	228655000	229245000
chr1	228690000	228930000
chr1	229250000	229340000
chr1	229255000	229500000
chr1	229345000	229445000
chr1	229450000	229485000
chr1	229510000	229550000
chr1	229530000	229650000
chr1	229655000	229715000
chr1	229655000	230320000
chr1	230060000	230305000
chr1	230215000	230315000
chr1	230320000	230625000
chr1	230620000	231230000
chr1	230630000	230900000
chr1	230865000	231210000
chr1	230900000	230990000
chr1	231210000	231335000
chr1	231335000	231605000
chr1	231340000	231420000
chr1	231425000	231530000
chr1	231535000	231610000
chr1	231615000	231735000
chr1	231740000	231845000
chr1	231815000	233265000
chr1	232625000	233295000
chr1	232630000	232935000
chr1	232640000	232790000
chr1	233295000	233385000
chr1	233350000	234085000
chr1	233390000	233435000
chr1	233440000	233595000
chr1	233595000	233705000
chr1	233710000	233795000
chr1	233800000	234080000
chr1	234085000	234205000
chr1	234105000	234465000
chr1	234110000	234330000
chr1	234325000	234485000
chr1	234480000	235090000
chr1	234490000	234600000
chr1	234605000	234770000
chr1	234775000	234835000
chr1	234840000	234955000
chr1	234960000	235010000
chr1	234960000	235090000
chr1	235095000	235245000
chr1	235105000	235460000
chr1	235235000	235420000
chr1	235250000	235330000
chr1	235335000	235420000
chr1	235425000	235505000
chr1	235505000	235720000
chr1	235505000	235780000
chr1	235505000	235995000
chr1	235785000	235845000
chr1	235850000	235975000
chr1	235980000	236095000
chr1	236095000	236525000
chr1	236100000	236290000
chr1	236310000	236505000
chr1	236525000	236605000
chr1	236605000	236900000
chr1	236610000	236755000
chr1	236755000	236900000
chr1	236915000	237595000
chr1	236980000	237030000
chr1	237025000	237585000
chr1	237035000	237090000
chr1	237580000	237800000
chr1	237720000	239985000
chr1	237860000	238240000
chr1	239335000	239925000
chr1	239930000	240015000
chr1	240015000	240185000
chr1	240070000	240710000
chr1	240215000	240705000
chr1	240295000	240695000
chr1	240720000	241495000
chr1	241500000	241635000
chr1	241505000	241845000
chr1	241650000	241835000
chr1	241845000	241890000
chr1	241895000	242020000
chr1	242015000	242445000
chr1	242450000	243020000
chr1	242635000	243010000
chr1	243015000	243050000
chr1	243055000	243325000
chr1	243180000	243320000
chr1	243255000	243330000
chr1	243330000	244315000
chr1	243335000	243415000
chr1	243340000	243760000
chr1	243420000	243585000
chr1	243590000	243700000
chr1	243705000	243755000
chr1	243760000	243850000
chr1	243855000	244035000
chr1	243855000	244285000
chr1	244050000	244270000
chr1	244295000	244460000
chr1	244465000	244595000
chr1	244575000	245070000
chr1	244600000	244800000
chr1	244805000	244860000
chr1	244820000	245050000
chr1	244865000	244975000
chr1	244980000	245060000
chr1	245065000	245150000
chr1	245070000	246760000
chr1	245080000	246490000
chr1	245115000	246005000
chr1	245140000	245390000
chr1	245805000	245880000
chr1	245880000	246010000
chr1	246010000	246485000
chr1	246330000	246440000
chr1	246490000	246560000
chr1	246490000	246685000
chr1	246690000	246770000
chr1	246775000	246830000
chr1	246835000	246965000
chr1	246930000	247360000
chr1	246950000	247205000
chr1	246965000	247080000
chr1	247085000	247215000
chr1	247220000	247310000
chr1	247325000	247365000
chr1	247350000	247580000
chr1	247365000	247495000
chr1	247500000	247925000
chr1	247660000	248220000
chr1	247925000	248200000
chr1	248220000	248400000
chr1	248405000	248530000
chr1	248535000	248615000
chr1	248620000	248685000
chr1	248690000	248810000
chr1	248820000	248930000
chr10	135000	360000
chr10	385000	500000
chr10	500000	790000
chr10	795000	925000
chr10	815000	1070000
chr10	905000	1065000
chr10	930000	990000
chr10	995000	1070000
chr10	1075000	1415000
chr10	1240000	3050000
chr10	1400000	1740000
chr10	1405000	1615000
chr10	1655000	1745000
chr10	2915000	3055000
chr10	2990000	3060000
chr10	3065000	3180000
chr10	3170000	4770000
chr10	3185000	3745000
chr10	3750000	3935000
chr10	3750000	4185000
chr10	3940000	4035000
chr10	4040000	4125000
chr10	4130000	4725000
chr10	4660000	4805000
chr10	4810000	4950000
chr10	4815000	5385000
chr10	4955000	5015000
chr10	5020000	5275000
chr10	5280000	5440000
chr10	5440000	5625000
chr10	5680000	5900000
chr10	5805000	5890000
chr10	5895000	5975000
chr10	5980000	6090000
chr10	6090000	6200000
chr10	6090000	6405000
chr10	6200000	6405000
chr10	6415000	6675000
chr10	6415000	7795000
chr10	6420000	6570000
chr10	6580000	6680000
chr10	6685000	6905000
chr10	6705000	7795000
chr10	6895000	7245000
chr10	7250000	7405000
chr10	7410000	7525000
chr10	7525000	7745000
chr10	7750000	7870000
chr10	7840000	9300000
chr10	7865000	8050000
chr10	8040000	8475000
chr10	8055000	8140000
chr10	8515000	9245000
chr10	9325000	11010000
chr10	10685000	11010000
chr10	11015000	11095000
chr10	11100000	11165000
chr10	11100000	11280000
chr10	11285000	11485000
chr10	11410000	11505000
chr10	11510000	11605000
chr10	11510000	11755000
chr10	11605000	11725000
chr10	11685000	11760000
chr10	11765000	11985000
chr10	11990000	12195000
chr10	12135000	12255000
chr10	12185000	13095000
chr10	12240000	12705000
chr10	12250000	12485000
chr10	12260000	12350000
chr10	12350000	12480000
chr10	12660000	12710000
chr10	12715000	13090000
chr10	13095000	13155000
chr10	13125000	13580000
chr10	13130000	13355000
chr10	13355000	14485000
chr10	13355000	15160000
chr10	13360000	13460000
chr10	13360000	13585000
chr10	13550000	15160000
chr10	13590000	13645000
chr10	13590000	14185000
chr10	13650000	13785000
chr10	13790000	14095000
chr10	14195000	14490000
chr10	14480000	15165000
chr10	14495000	14595000
chr10	14525000	14830000
chr10	14600000	14660000
chr10	14660000	14745000
chr10	14660000	14820000
chr10	14750000	14830000
chr10	14835000	14975000
chr10	14980000	15090000
chr10	14980000	15165000
chr10	15100000	15170000
chr10	15175000	15210000
chr10	15210000	15425000
chr10	15210000	15825000
chr10	15425000	15750000
chr10	15765000	15880000
chr10	15880000	16810000
chr10	15900000	16375000
chr10	16420000	16810000
chr10	16435000	16520000
chr10	16530000	16805000
chr10	16830000	17270000
chr10	17135000	17255000
chr10	17260000	17430000
chr10	17405000	17765000
chr10	17435000	17600000
chr10	17605000	17745000
chr10	17750000	17900000
chr10	17880000	18220000
chr10	18225000	18310000
chr10	18285000	18685000
chr10	18310000	18545000
chr10	18315000	18395000
chr10	18550000	18575000
chr10	18580000	18680000
chr10	18730000	19790000
chr10	18885000	19655000
chr10	19755000	20845000
chr10	19810000	20100000
chr10	19905000	20005000
chr10	20850000	21050000
chr10	21055000	21265000
chr10	21270000	21490000
chr10	21490000	21970000
chr10	21515000	21730000
chr10	21740000	21970000
chr10	21890000	22000000
chr10	21975000	23090000
chr10	22005000	22225000
chr10	22230000	22315000
chr10	22230000	22545000
chr10	22300000	22545000
chr10	22320000	22435000
chr10	22440000	22570000
chr10	22565000	22990000
chr10	22575000	22720000
chr10	22990000	23090000
chr10	23095000	23155000
chr10	23125000	23720000
chr10	23140000	24585000
chr10	23155000	23305000
chr10	23310000	23525000
chr10	23460000	23530000
chr10	23535000	23710000
chr10	23715000	23975000
chr10	23970000	24555000
chr10	23980000	24190000
chr10	24195000	24360000
chr10	24200000	24525000
chr10	24365000	24515000
chr10	24520000	24570000
chr10	24575000	24630000
chr10	24590000	25085000
chr10	24630000	24730000
chr10	24735000	24875000
chr10	24880000	24960000
chr10	25020000	25090000
chr10	25095000	25865000
chr10	25720000	26325000
chr10	26300000	27360000
chr10	26330000	26430000
chr10	26330000	26560000
chr10	26395000	27310000
chr10	26435000	26490000
chr10	26495000	26565000
chr10	26570000	26690000
chr10	26695000	26720000
chr10	26725000	26880000
chr10	26885000	27095000
chr10	27100000	27155000
chr10	27100000	27240000
chr10	27245000	27315000
chr10	27320000	27370000
chr10	27370000	27690000
chr10	27375000	27470000
chr10	27375000	28410000
chr10	27485000	27555000
chr10	27560000	27665000
chr10	28240000	28395000
chr10	28400000	28525000
chr10	28530000	28625000
chr10	28630000	29330000
chr10	28990000	29230000
chr10	29235000	29315000
chr10	29320000	29365000
chr10	29370000	29505000
chr10	29455000	29515000
chr10	29520000	29735000
chr10	29740000	29990000
chr10	29985000	30275000
chr10	30250000	30350000
chr10	30355000	30385000
chr10	30385000	30600000
chr10	30540000	30600000
chr10	30605000	30665000
chr10	30670000	30780000
chr10	30705000	31815000
chr10	30735000	30790000
chr10	30785000	31030000
chr10	31035000	31140000
chr10	31070000	31300000
chr10	31145000	31280000
chr10	31315000	31490000
chr10	31320000	31400000
chr10	31425000	31510000
chr10	31515000	31820000
chr10	31825000	32030000
chr10	31830000	32375000
chr10	31940000	32005000
chr10	32010000	32060000
chr10	32065000	32185000
chr10	32190000	32245000
[truncated: 16,867 more rows]
