# Supplementary material for: An integrative TAD catalog in lymphoblastoid cell lines discloses the functional impact of deletions and insertions in human genomes
Source: HighWire-hosted journal article supplement (doi:10.1101/gr.279419.124), 2024-12-01
Supplement: Supplemental_Table_S3.xlsx [file Supplemental_Table_S3.xlsx]

## Sheet: Table S3
Table S3. The TAD boundary locations of the Integrative Catalog
chr	boundary_start	boundary_end	boundary_score
chr1	865001	870000	0.355466
chr1	975001	980000	0.570913
chr1	1110001	1115000	0.441434
chr1	1300001	1305000	0.31104
chr1	1370001	1375000	0.296479
chr1	1510001	1515000	0.454913
chr1	1620001	1625000	0.272615
chr1	1695001	1700000	0.248481
chr1	1745001	1750000	0.557953
chr1	1915001	1920000	1.55661
chr1	2050001	2055000	0.227214
chr1	2190001	2195000	0.689082
chr1	2315001	2320000	0.609123
chr1	2405001	2410000	1.09614
chr1	2525001	2530000	0.480608
chr1	2585001	2590000	0.535163
chr1	2810001	2815000	0.54307
chr1	3425001	3430000	0.286909
chr1	3490001	3495000	0.258732
chr1	3620001	3625000	0.938929
chr1	3740001	3745000	0.290985
chr1	3910001	3915000	0.925409
chr1	4840001	4845000	0.247581
chr1	5385001	5390000	0.203826
chr1	5495001	5500000	0.237776
chr1	5975001	5980000	0.321264
chr1	6060001	6065000	0.299821
chr1	6190001	6195000	0.398014
chr1	6240001	6245000	0.866958
chr1	6335001	6340000	0.918187
chr1	6425001	6430000	0.737882
chr1	6480001	6485000	0.313674
chr1	6550001	6555000	0.269382
chr1	6645001	6650000	0.318122
chr1	6700001	6705000	0.671682
chr1	6785001	6790000	0.654571
chr1	6905001	6910000	0.50039
chr1	7225001	7230000	0.256387
chr1	7650001	7655000	0.72106
chr1	7765001	7770000	0.603429
chr1	7950001	7955000	0.384253
chr1	8025001	8030000	0.538779
chr1	8190001	8195000	0.183375
chr1	8355001	8360000	0.423587
chr1	8555001	8560000	0.622324
chr1	8725001	8730000	0.489499
chr1	8875001	8880000	0.814678
chr1	9000001	9005000	0.827897
chr1	9105001	9110000	0.959231
chr1	9275001	9280000	0.519717
chr1	9390001	9395000	0.236393
chr1	9460001	9465000	0.255327
chr1	9490001	9495000	0.566721
chr1	9590001	9595000	1.04825
chr1	9720001	9725000	0.46162
chr1	9770001	9775000	0.600381
chr1	9870001	9875000	0.890916
chr1	9945001	9950000	0.780781
chr1	10030001	10035000	0.511044
chr1	10170001	10175000	0.34227
chr1	10185001	10190000	0.34227
chr1	10195001	10200000	0.34227
chr1	10350001	10355000	0.462357
chr1	10425001	10430000	0.600473
chr1	10500001	10505000	0.919214
chr1	10940001	10945000	0.400048
chr1	11015001	11020000	0.441933
chr1	11640001	11645000	1.15427
chr1	11735001	11740000	0.480957
chr1	11800001	11805000	0.492977
chr1	11905001	11910000	1.09784
chr1	11985001	11990000	0.39568
chr1	12110001	12115000	1.17253
chr1	12230001	12235000	0.790097
chr1	12685001	12690000	0.260316
chr1	13265001	13270000	1.96735
chr1	13435001	13440000	0.269549
chr1	13450001	13455000	0.269549
chr1	13655001	13660000	0.954233
chr1	13820001	13825000	0.645583
chr1	13970001	13975000	0.388617
chr1	14595001	14600000	0.28821
chr1	15045001	15050000	0.188417
chr1	15110001	15115000	0.579709
chr1	15305001	15310000	0.771535
chr1	15440001	15445000	0.498382
chr1	15520001	15525000	0.865192
chr1	15620001	15625000	0.26546
chr1	15675001	15680000	0.229046
chr1	15795001	15800000	0.669934
chr1	15920001	15925000	0.207113
chr1	16000001	16005000	0.423042
chr1	16070001	16075000	0.82796
chr1	16190001	16195000	0.475496
chr1	16245001	16250000	0.440836
chr1	16360001	16365000	0.692294
chr1	16440001	16445000	0.333813
chr1	16545001	16550000	0.674583
chr1	16620001	16625000	1.25946
chr1	16635001	16640000	1.25946
chr1	16645001	16650000	1.25946
chr1	16740001	16745000	1.16871
chr1	16745001	16750000	1.16871
chr1	16900001	16905000	1.16871
chr1	17055001	17060000	0.896574
chr1	17125001	17130000	0.852603
chr1	17245001	17250000	0.375144
chr1	17400001	17405000	0.45454
chr1	17495001	17500000	0.802523
chr1	17645001	17650000	0.384523
chr1	18105001	18110000	0.290076
chr1	18585001	18590000	0.380855
chr1	18875001	18880000	0.887547
chr1	18975001	18980000	0.487852
chr1	19065001	19070000	0.510378
chr1	19250001	19255000	0.631829
chr1	19335001	19340000	0.323126
chr1	19385001	19390000	0.364079
chr1	19490001	19495000	0.566722
chr1	19585001	19590000	0.744414
chr1	19650001	19655000	0.79772
chr1	19715001	19720000	0.343718
chr1	19820001	19825000	0.272971
chr1	19880001	19885000	0.201028
chr1	19910001	19915000	0.280595
chr1	20075001	20080000	0.401232
chr1	20210001	20215000	0.446246
chr1	20495001	20500000	0.573637
chr1	20655001	20660000	0.543913
chr1	20720001	20725000	0.238033
chr1	20725001	20730000	0.238033
chr1	20785001	20790000	0.384742
chr1	20960001	20965000	0.206438
chr1	21195001	21200000	0.725147
chr1	21375001	21380000	0.797679
chr1	21495001	21500000	0.623324
chr1	21665001	21670000	0.649051
chr1	21790001	21795000	0.513986
chr1	21970001	21975000	0.280863
chr1	22015001	22020000	1.00476
chr1	22115001	22120000	0.779186
chr1	22415001	22420000	0.538035
chr1	22530001	22535000	0.3037
chr1	22665001	22670000	0.493922
chr1	22965001	22970000	0.437251
chr1	23090001	23095000	0.921822
chr1	23185001	23190000	1.17653
chr1	23280001	23285000	0.707669
chr1	23400001	23405000	0.319656
chr1	23480001	23485000	0.650504
chr1	23545001	23550000	1.26753
chr1	23640001	23645000	0.859881
chr1	23770001	23775000	0.934403
chr1	23925001	23930000	0.449661
chr1	23955001	23960000	0.445984
chr1	24050001	24055000	0.359825
chr1	24145001	24150000	0.331131
chr1	24195001	24200000	0.542138
chr1	24315001	24320000	0.193856
chr1	24395001	24400000	0.92712
chr1	24635001	24640000	0.870281
chr1	24750001	24755000	0.347732
chr1	24840001	24845000	1.261
chr1	24920001	24925000	0.756904
chr1	25035001	25040000	1.11651
chr1	25105001	25110000	0.351697
chr1	25220001	25225000	0.7955
chr1	25340001	25345000	0.656128
chr1	25400001	25405000	0.483646
chr1	25520001	25525000	0.557325
chr1	25610001	25615000	0.409866
chr1	25685001	25690000	0.265106
chr1	25810001	25815000	1.00291
chr1	25895001	25900000	0.59808
chr1	26010001	26015000	0.732216
chr1	26090001	26095000	0.716644
chr1	26165001	26170000	0.92526
chr1	26240001	26245000	0.931986
chr1	26245001	26250000	0.931986
chr1	26260001	26265000	0.931986
chr1	26345001	26350000	0.477061
chr1	26430001	26435000	0.304798
chr1	26470001	26475000	0.50908
chr1	26540001	26545000	0.358724
chr1	26600001	26605000	0.966969
chr1	26690001	26695000	0.968385
chr1	26790001	26795000	1.07601
chr1	26895001	26900000	0.653215
chr1	27025001	27030000	0.374701
chr1	27100001	27105000	0.93699
chr1	27195001	27200000	0.32638
chr1	27290001	27295000	1.0261
chr1	27400001	27405000	1.54251
chr1	27495001	27500000	0.57616
chr1	27600001	27605000	1.18822
chr1	27670001	27675000	1.26899
chr1	27725001	27730000	0.278273
chr1	27840001	27845000	1.00966
chr1	27985001	27990000	0.275617
chr1	28080001	28085000	0.679207
chr1	28240001	28245000	1.18844
chr1	28365001	28370000	0.572177
chr1	28505001	28510000	1.14928
chr1	28640001	28645000	0.704047
chr1	28770001	28775000	0.834761
chr1	28880001	28885000	1.13561
chr1	29045001	29050000	0.250998
chr1	29230001	29235000	0.850626
chr1	29350001	29355000	0.223762
chr1	29875001	29880000	0.188696
chr1	30710001	30715000	2.17759
chr1	30790001	30795000	1.50605
chr1	30925001	30930000	0.801014
chr1	31070001	31075000	0.813702
chr1	31160001	31165000	0.488186
chr1	31255001	31260000	0.260306
chr1	31420001	31425000	0.584689
chr1	31550001	31555000	1.01986
chr1	31640001	31645000	0.840412
chr1	31795001	31800000	0.732
chr1	31970001	31975000	0.350658
chr1	32070001	32075000	0.313785
chr1	32100001	32105000	0.229024
chr1	32185001	32190000	0.621654
chr1	32325001	32330000	0.548219
chr1	32405001	32410000	0.676505
chr1	32515001	32520000	0.390805
chr1	32615001	32620000	0.303064
chr1	32690001	32695000	0.486619
chr1	32780001	32785000	0.526035
chr1	32875001	32880000	0.435927
chr1	32925001	32930000	0.630103
chr1	33090001	33095000	0.289537
chr1	33185001	33190000	0.225841
chr1	33280001	33285000	0.46728
chr1	33375001	33380000	0.610465
chr1	33480001	33485000	0.57555
chr1	33630001	33635000	0.34715
chr1	34195001	34200000	0.185512
chr1	34455001	34460000	0.348177
chr1	34600001	34605000	0.618429
chr1	34755001	34760000	0.731615
chr1	34860001	34865000	0.741029
chr1	34980001	34985000	0.336419
chr1	35185001	35190000	0.612274
chr1	35300001	35305000	0.292358
chr1	35440001	35445000	0.513159
chr1	35560001	35565000	1.13474
chr1	35640001	35645000	0.342722
chr1	35715001	35720000	0.57781
chr1	35780001	35785000	0.517671
chr1	35875001	35880000	0.255404
chr1	35930001	35935000	0.316288
chr1	36085001	36090000	0.751602
chr1	36140001	36145000	0.371578
chr1	36215001	36220000	0.306832
chr1	36300001	36305000	0.636315
chr1	36465001	36470000	0.487634
chr1	36565001	36570000	0.234378
chr1	36575001	36580000	0.234378
chr1	36705001	36710000	0.199149
chr1	37235001	37240000	0.185693
chr1	37325001	37330000	0.475772
chr1	37435001	37440000	1.01615
chr1	37560001	37565000	0.204742
chr1	37595001	37600000	0.667488
chr1	37690001	37695000	1.05986
chr1	37795001	37800000	0.559979
chr1	37870001	37875000	0.791997
chr1	38015001	38020000	0.83694
chr1	38470001	38475000	0.190014
chr1	38595001	38600000	0.507006
chr1	38835001	38840000	0.665362
chr1	38985001	38990000	0.319898
chr1	39095001	39100000	1.07636
chr1	39185001	39190000	0.890759
chr1	39265001	39270000	0.946512
chr1	39465001	39470000	0.28056
chr1	39555001	39560000	0.572974
chr1	39660001	39665000	0.395071
chr1	39725001	39730000	0.494108
chr1	39805001	39810000	0.767167
chr1	39905001	39910000	0.865357
chr1	39975001	39980000	0.412425
chr1	40045001	40050000	0.944173
chr1	40060001	40065000	0.944173
chr1	40065001	40070000	0.944173
chr1	40145001	40150000	0.721928
chr1	40260001	40265000	0.222248
chr1	40330001	40335000	0.746967
chr1	40415001	40420000	1.0888
chr1	40535001	40540000	0.476588
chr1	40600001	40605000	0.442986
chr1	40680001	40685000	0.71822
chr1	40765001	40770000	0.542828
chr1	40855001	40860000	0.763241
chr1	40975001	40980000	0.411521
chr1	41250001	41255000	0.803377
chr1	41510001	41515000	0.205302
chr1	41565001	41570000	0.372162
chr1	41745001	41750000	0.457034
chr1	41805001	41810000	0.454272
chr1	41890001	41895000	0.411628
chr1	42040001	42045000	0.490175
chr1	42170001	42175000	0.338061
chr1	42335001	42340000	0.544658
chr1	42460001	42465000	0.269477
chr1	42560001	42565000	0.291584
chr1	42650001	42655000	0.40408
chr1	42760001	42765000	0.568808
chr1	42850001	42855000	0.224782
chr1	42910001	42915000	1.01012
chr1	42965001	42970000	0.331484
chr1	43080001	43085000	0.461072
chr1	43155001	43160000	0.32948
chr1	43225001	43230000	0.615985
chr1	43355001	43360000	0.349919
chr1	43520001	43525000	0.416381
chr1	43640001	43645000	0.523951
chr1	43755001	43760000	0.661913
chr1	43860001	43865000	0.187864
chr1	43935001	43940000	0.744733
chr1	44060001	44065000	0.767813
chr1	44205001	44210000	0.390861
chr1	44380001	44385000	0.328086
chr1	44720001	44725000	1.06513
chr1	44835001	44840000	0.676777
chr1	45010001	45015000	0.69414
chr1	45295001	45300000	1.12604
chr1	45490001	45495000	1.43196
chr1	45585001	45590000	1.19075
chr1	45685001	45690000	0.566038
chr1	45810001	45815000	0.257742
chr1	45870001	45875000	0.195385
chr1	46030001	46035000	0.68677
chr1	46130001	46135000	0.421973
chr1	46185001	46190000	0.415682
chr1	46240001	46245000	0.578107
chr1	46365001	46370000	0.775899
chr1	46540001	46545000	0.593979
chr1	46600001	46605000	0.318702
chr1	46730001	46735000	0.747923
chr1	46875001	46880000	0.341142
chr1	47085001	47090000	0.36687
chr1	47170001	47175000	0.665081
chr1	47260001	47265000	0.287061
chr1	47375001	47380000	0.241712
chr1	47440001	47445000	0.455497
chr1	47710001	47715000	0.208088
chr1	47985001	47990000	0.285619
chr1	48100001	48105000	0.513862
chr1	48205001	48210000	0.316552
chr1	48245001	48250000	0.299245
chr1	48530001	48535000	0.237071
chr1	48695001	48700000	0.219255
chr1	48825001	48830000	0.307778
chr1	50340001	50345000	0.562269
chr1	50435001	50440000	0.181116
chr1	50600001	50605000	0.315707
chr1	50740001	50745000	0.436365
chr1	50865001	50870000	0.459822
chr1	51060001	51065000	0.282485
chr1	51190001	51195000	0.570164
chr1	51300001	51305000	0.466447
chr1	51410001	51415000	0.240275
chr1	51530001	51535000	0.357499
chr1	51620001	51625000	0.259849
chr1	51770001	51775000	0.392944
chr1	51885001	51890000	0.774542
chr1	52025001	52030000	0.537751
chr1	52135001	52140000	0.285074
chr1	52360001	52365000	0.315289
chr1	52405001	52410000	0.245091
chr1	52555001	52560000	0.33337
chr1	52690001	52695000	0.756048
chr1	52830001	52835000	0.362765
chr1	52920001	52925000	0.264582
chr1	53055001	53060000	0.300971
chr1	53185001	53190000	0.532383
chr1	53245001	53250000	0.424167
chr1	53410001	53415000	0.478929
chr1	53755001	53760000	0.356693
chr1	53835001	53840000	0.899319
chr1	53960001	53965000	0.993042
chr1	54090001	54095000	0.218282
chr1	54405001	54410000	0.859796
chr1	54490001	54495000	0.837102
chr1	54665001	54670000	0.306214
chr1	54815001	54820000	0.350934
chr1	55060001	55065000	0.83075
chr1	55130001	55135000	0.36346
chr1	55210001	55215000	0.270293
chr1	55280001	55285000	0.873067
chr1	55375001	55380000	0.360068
chr1	56585001	56590000	0.880166
chr1	56830001	56835000	0.453166
chr1	58050001	58055000	0.222092
chr1	58165001	58170000	0.241681
chr1	58490001	58495000	0.450919
chr1	58655001	58660000	0.573543
chr1	58700001	58705000	0.238943
chr1	58730001	58735000	0.189925
chr1	58775001	58780000	0.593042
chr1	58900001	58905000	0.305862
chr1	59050001	59055000	0.329262
chr1	59145001	59150000	0.289711
chr1	59290001	59295000	0.482824
chr1	59695001	59700000	0.53339
chr1	59765001	59770000	0.314967
chr1	59870001	59875000	0.412424
chr1	59965001	59970000	0.644151
chr1	61040001	61045000	0.402605
chr1	61455001	61460000	0.220202
chr1	61640001	61645000	0.295133
chr1	61855001	61860000	0.285507
chr1	62065001	62070000	0.348379
chr1	62155001	62160000	0.634653
chr1	62430001	62435000	0.823112
chr1	62500001	62505000	0.254083
chr1	62690001	62695000	0.246637
chr1	62750001	62755000	0.505819
chr1	62760001	62765000	0.505819
chr1	62775001	62780000	0.505819
chr1	62845001	62850000	0.341707
chr1	63155001	63160000	0.184024
chr1	63360001	63365000	0.270312
chr1	63450001	63455000	0.278673
chr1	63525001	63530000	0.252249
chr1	63615001	63620000	0.276845
chr1	63685001	63690000	0.34798
chr1	63920001	63925000	0.239137
chr1	64130001	64135000	0.317658
chr1	64255001	64260000	0.719882
chr1	64675001	64680000	0.201131
chr1	64825001	64830000	0.638777
chr1	64965001	64970000	0.437892
chr1	65060001	65065000	0.661334
chr1	65140001	65145000	0.610753
chr1	65225001	65230000	0.545473
chr1	65420001	65425000	0.215953
chr1	65595001	65600000	0.257374
chr1	65685001	65690000	0.404516
chr1	65950001	65955000	0.237041
chr1	66240001	66245000	1.21472
chr1	66340001	66345000	0.678632
chr1	66450001	66455000	1.84046
chr1	66730001	66735000	0.42561
chr1	66920001	66925000	1.16748
chr1	66990001	66995000	0.462852
chr1	67045001	67050000	0.237155
chr1	67140001	67145000	0.563962
chr1	67220001	67225000	0.947036
chr1	67340001	67345000	0.389761
chr1	67425001	67430000	0.379105
chr1	67520001	67525000	0.725794
chr1	67675001	67680000	0.609961
chr1	67765001	67770000	1.21241
chr1	67850001	67855000	0.246137
chr1	68110001	68115000	0.561002
chr1	68355001	68360000	0.263017
chr1	68450001	68455000	0.216475
chr1	68510001	68515000	0.225576
chr1	70125001	70130000	0.593108
chr1	70215001	70220000	0.226553
chr1	70350001	70355000	0.406276
chr1	70420001	70425000	0.423309
chr1	70520001	70525000	0.634917
chr1	71050001	71055000	0.320608
chr1	71090001	71095000	0.824104
chr1	71910001	71915000	0.204592
chr1	72285001	72290000	0.867061
chr1	72355001	72360000	1.00845
chr1	73125001	73130000	0.294017
chr1	74470001	74475000	0.313794
chr1	74760001	74765000	0.765538
chr1	75220001	75225000	0.489852
chr1	75410001	75415000	0.233192
chr1	75635001	75640000	0.214447
chr1	75715001	75720000	0.919729
chr1	75805001	75810000	0.833693
chr1	75905001	75910000	0.27576
chr1	75995001	76000000	0.377019
chr1	76150001	76155000	0.206253
chr1	76330001	76335000	0.256842
chr1	77135001	77140000	0.426489
chr1	77225001	77230000	0.287348
chr1	77535001	77540000	0.384895
chr1	77685001	77690000	0.701206
chr1	77925001	77930000	0.393531
chr1	78005001	78010000	0.42754
chr1	78140001	78145000	0.785536
chr1	78325001	78330000	0.201502
chr1	78600001	78605000	1.57653
chr1	78685001	78690000	1.12064
chr1	78835001	78840000	0.301104
chr1	79500001	79505000	0.322211
chr1	80915001	80920000	0.439914
chr1	81400001	81405000	0.228555
chr1	81550001	81555000	0.289415
chr1	81785001	81790000	0.206291
chr1	83275001	83280000	0.194344
chr1	83390001	83395000	0.388863
chr1	83890001	83895000	0.497497
chr1	84000001	84005000	0.204908
chr1	84070001	84075000	0.336939
chr1	84135001	84140000	0.523492
chr1	84305001	84310000	0.228195
chr1	84435001	84440000	0.687189
chr1	84570001	84575000	0.315905
chr1	84625001	84630000	0.575107
chr1	84765001	84770000	0.517129
chr1	84935001	84940000	1.5246
chr1	85090001	85095000	0.382468
chr1	85275001	85280000	0.622743
chr1	85295001	85300000	0.622743
chr1	85565001	85570000	0.279255
chr1	85710001	85715000	0.408288
chr1	85885001	85890000	0.31712
chr1	86025001	86030000	0.289557
chr1	86355001	86360000	0.642911
chr1	86510001	86515000	0.498216
chr1	86655001	86660000	0.957853
chr1	86695001	86700000	1.81925
chr1	86745001	86750000	0.197565
chr1	86835001	86840000	0.385535
chr1	86915001	86920000	0.327937
chr1	87020001	87025000	0.527411
chr1	87110001	87115000	0.875872
chr1	87325001	87330000	0.549908
chr1	87790001	87795000	0.186284
chr1	87955001	87960000	0.297077
chr1	88165001	88170000	0.188126
chr1	88645001	88650000	0.567938
chr1	88885001	88890000	0.508968
chr1	88980001	88985000	0.66185
chr1	89080001	89085000	0.319398
chr1	89195001	89200000	0.311298
chr1	89270001	89275000	0.28575
chr1	89355001	89360000	0.557426
chr1	89475001	89480000	0.826214
chr1	89620001	89625000	0.910168
chr1	89770001	89775000	0.636957
chr1	90000001	90005000	0.51503
chr1	90035001	90040000	0.289823
chr1	90695001	90700000	0.284014
chr1	90845001	90850000	0.307266
chr1	91020001	91025000	0.372933
chr1	91170001	91175000	0.383771
chr1	91275001	91280000	0.295083
chr1	91495001	91500000	0.588005
chr1	91805001	91810000	0.25126
chr1	91935001	91940000	0.40157
chr1	92295001	92300000	0.441084
chr1	92460001	92465000	0.731933
chr1	92610001	92615000	0.826247
chr1	92730001	92735000	0.291452
chr1	92835001	92840000	1.13484
chr1	92955001	92960000	0.368863
chr1	93005001	93010000	0.830815
chr1	93080001	93085000	0.82301
chr1	93180001	93185000	0.315328
chr1	93370001	93375000	0.248892
chr1	93430001	93435000	0.209312
chr1	93620001	93625000	0.642519
chr1	93750001	93755000	0.39741
chr1	93840001	93845000	0.61562
chr1	93910001	93915000	0.58814
chr1	94025001	94030000	0.26179
chr1	94340001	94345000	0.291124
chr1	94405001	94410000	0.180397
chr1	94480001	94485000	0.364824
chr1	94810001	94815000	0.631678
chr1	95065001	95070000	0.618025
chr1	95235001	95240000	0.337046
chr1	96225001	96230000	0.207154
chr1	96710001	96715000	0.833802
chr1	96840001	96845000	0.607846
chr1	96955001	96960000	0.309224
chr1	97130001	97135000	0.197095
chr1	97535001	97540000	0.311211
chr1	97815001	97820000	0.258347
chr1	97925001	97930000	0.435564
chr1	98055001	98060000	0.419954
chr1	99170001	99175000	0.259244
chr1	99480001	99485000	0.203137
chr1	99705001	99710000	0.391308
chr1	99805001	99810000	0.345563
chr1	99965001	99970000	0.250588
chr1	100035001	100040000	0.645218
chr1	100135001	100140000	0.611
chr1	100265001	100270000	0.2792
chr1	100350001	100355000	0.50052
chr1	100455001	100460000	1.03218
chr1	100545001	100550000	0.374799
chr1	100890001	100895000	0.833146
chr1	101020001	101025000	0.275237
chr1	101125001	101130000	0.502724
chr1	101240001	101245000	0.494241
chr1	101295001	101300000	1.27503
chr1	101365001	101370000	0.309796
chr1	101455001	101460000	0.724745
chr1	101505001	101510000	0.346444
chr1	101595001	101600000	0.24322
chr1	103515001	103520000	0.837342
chr1	103565001	103570000	0.416697
chr1	103620001	103625000	1.65541
chr1	103935001	103940000	0.182463
chr1	104645001	104650000	0.327992
chr1	104785001	104790000	0.653134
chr1	105030001	105035000	0.196596
chr1	107055001	107060000	0.303849
chr1	107145001	107150000	0.435163
chr1	107420001	107425000	0.548137
chr1	107535001	107540000	0.49828
chr1	107775001	107780000	0.713166
chr1	107970001	107975000	0.307261
chr1	108135001	108140000	0.432082
chr1	108200001	108205000	2.43446
chr1	108575001	108580000	0.913851
chr1	108650001	108655000	0.420235
chr1	108690001	108695000	0.195547
chr1	108750001	108755000	0.347283
chr1	108810001	108815000	0.450529
chr1	108905001	108910000	0.510064
chr1	109035001	109040000	0.398751
chr1	109105001	109110000	0.604858
chr1	109205001	109210000	0.358616
chr1	109260001	109265000	0.351812
chr1	109400001	109405000	0.660757
chr1	109480001	109485000	0.685847
chr1	109545001	109550000	1.30284
chr1	109635001	109640000	0.779929
chr1	109775001	109780000	0.655373
chr1	109985001	109990000	0.584383
chr1	110030001	110035000	0.498035
chr1	110125001	110130000	0.437531
chr1	110195001	110200000	0.754171
chr1	110325001	110330000	0.980538
chr1	110405001	110410000	0.738445
chr1	110500001	110505000	0.564535
chr1	110615001	110620000	1.2652
chr1	110680001	110685000	0.23678
chr1	110775001	110780000	0.88362
chr1	110870001	110875000	0.333373
chr1	110970001	110975000	0.266376
chr1	111025001	111030000	0.289037
chr1	111125001	111130000	0.630625
chr1	111225001	111230000	0.997384
chr1	111340001	111345000	0.386851
chr1	111445001	111450000	0.30896
chr1	111500001	111505000	0.539088
chr1	111580001	111585000	0.330559
chr1	111655001	111660000	0.248994
chr1	111695001	111700000	0.338957
chr1	111775001	111780000	0.789449
chr1	112375001	112380000	1.11633
chr1	112470001	112475000	0.62931
chr1	112610001	112615000	0.820627
chr1	112710001	112715000	1.79975
chr1	112810001	112815000	0.581058
chr1	112875001	112880000	0.329559
chr1	113065001	113070000	0.559702
chr1	113135001	113140000	0.605173
chr1	113350001	113355000	0.198369
chr1	113355001	113360000	0.198369
chr1	113370001	113375000	0.198369
chr1	113675001	113680000	0.44339
chr1	113815001	113820000	0.688553
chr1	113975001	113980000	0.706703
chr1	114335001	114340000	0.347629
chr1	114515001	114520000	0.456442
chr1	114580001	114585000	0.453647
chr1	114675001	114680000	0.43867
chr1	114685001	114690000	0.43867
chr1	114695001	114700000	0.43867
chr1	114785001	114790000	0.564058
chr1	114955001	114960000	0.338461
chr1	115050001	115055000	0.293105
chr1	115125001	115130000	0.677829
chr1	115265001	115270000	0.205597
chr1	115470001	115475000	0.189517
chr1	115600001	115605000	0.720883
chr1	115705001	115710000	0.586462
chr1	115785001	115790000	0.686805
chr1	115975001	115980000	0.233126
chr1	116130001	116135000	0.402214
chr1	116355001	116360000	0.510133
chr1	116425001	116430000	0.413117
chr1	116495001	116500000	1.20296
chr1	116570001	116575000	0.743987
chr1	116725001	116730000	0.836836
chr1	116820001	116825000	0.4827
chr1	116990001	116995000	0.72414
chr1	117055001	117060000	1.34008
chr1	117130001	117135000	0.472645
chr1	117345001	117350000	0.450816
chr1	117510001	117515000	0.651124
chr1	117595001	117600000	0.365054
chr1	117680001	117685000	0.902267
chr1	117760001	117765000	0.377292
chr1	117975001	117980000	0.285766
chr1	118145001	118150000	0.340906
chr1	119015001	119020000	0.500659
chr1	119140001	119145000	0.381306
chr1	119270001	119275000	0.700184
chr1	119375001	119380000	0.966465
chr1	119540001	119545000	0.239095
chr1	119600001	119605000	1.13416
chr1	119685001	119690000	0.859707
chr1	119950001	119955000	0.577247
chr1	120045001	120050000	2.35437
chr1	120050001	120055000	2.35437
chr1	120065001	120070000	2.35437
chr1	120140001	120145000	1.33205
chr1	120210001	120215000	1.07781
chr1	120400001	120405000	0.390227
chr1	120440001	120445000	0.919558
chr1	120485001	120490000	0.532764
chr1	120755001	120760000	2.94368
chr1	120840001	120845000	3.32132
chr1	120940001	120945000	0.71566
chr1	121035001	121040000	0.907555
chr1	121105001	121110000	0.912486
chr1	121160001	121165000	2.45314
chr1	121240001	121245000	1.08336
chr1	121285001	121290000	1.70652
chr1	121315001	121320000	1.59689
chr1	121360001	121365000	2.66439
chr1	122425001	122430000	1.94681
chr1	124850001	124855000	2.92506
chr1	124920001	124925000	2.65791
chr1	125065001	125070000	0.379188
chr1	143760001	143765000	1.39898
chr1	143800001	143805000	3.3816
chr1	143860001	143865000	1.89134
chr1	143875001	143880000	1.89134
chr1	143885001	143890000	1.89134
chr1	143965001	143970000	2.61537
chr1	144520001	144525000	1.8199
chr1	144995001	145000000	3.44527
chr1	145180001	145185000	1.94397
chr1	145505001	145510000	0.993915
chr1	145580001	145585000	0.450091
chr1	145720001	145725000	0.345302
chr1	145825001	145830000	0.802156
chr1	145915001	145920000	0.399634
chr1	145960001	145965000	0.520702
chr1	146050001	146055000	4.42118
chr1	146370001	146375000	0.421597
chr1	146445001	146450000	0.791699
chr1	146510001	146515000	1.40993
chr1	146560001	146565000	2.05867
chr1	146640001	146645000	0.904418
chr1	146650001	146655000	0.187879
chr1	146670001	146675000	0.519469
chr1	146760001	146765000	0.575535
chr1	146870001	146875000	0.88192
chr1	146890001	146895000	0.88192
chr1	146940001	146945000	0.634186
chr1	146975001	146980000	0.848798
chr1	147095001	147100000	0.304124
chr1	147160001	147165000	0.669714
chr1	147250001	147255000	0.723754
chr1	147465001	147470000	0.332348
chr1	147595001	147600000	0.222957
chr1	147645001	147650000	0.262324
chr1	147900001	147905000	0.613464
chr1	147910001	147915000	0.613464
chr1	147925001	147930000	0.613464
chr1	148080001	148085000	0.987317
chr1	148190001	148195000	1.371
chr1	148225001	148230000	1.81198
chr1	148280001	148285000	0.867934
chr1	148330001	148335000	0.25092
chr1	148400001	148405000	0.197337
chr1	148465001	148470000	1.32488
chr1	148515001	148520000	2.82275
chr1	148910001	148915000	3.6185
chr1	148985001	148990000	0.963716
chr1	149080001	149085000	1.11613
chr1	149120001	149125000	2.44289
chr1	149125001	149130000	2.44289
chr1	149130001	149135000	2.44289
chr1	149185001	149190000	1.9484
chr1	149420001	149425000	3.17282
chr1	149445001	149450000	0.511668
chr1	149640001	149645000	1.2768
chr1	149700001	149705000	0.694269
chr1	149730001	149735000	0.992407
chr1	149810001	149815000	2.05015
chr1	149890001	149895000	2.35962
chr1	149950001	149955000	0.31679
chr1	150065001	150070000	1.01694
chr1	150180001	150185000	0.433785
chr1	150230001	150235000	0.577145
chr1	150325001	150330000	0.258174
chr1	150360001	150365000	0.546124
chr1	150450001	150455000	0.484376
chr1	150550001	150555000	1.11932
chr1	150630001	150635000	0.798716
chr1	150750001	150755000	0.223974
chr1	150825001	150830000	0.323285
chr1	150930001	150935000	0.592196
chr1	150980001	150985000	0.518592
chr1	150985001	150990000	0.518592
chr1	151000001	151005000	0.518592
chr1	151075001	151080000	0.64728
chr1	151165001	151170000	1.15156
chr1	151275001	151280000	0.742839
chr1	151340001	151345000	0.264421
chr1	151430001	151435000	0.708956
chr1	151535001	151540000	0.253642
chr1	151595001	151600000	0.464774
chr1	151740001	151745000	0.228118
chr1	151840001	151845000	0.291096
chr1	151875001	151880000	0.1902
chr1	152045001	152050000	0.993345
chr1	152125001	152130000	0.247411
chr1	152190001	152195000	0.73088
chr1	152460001	152465000	0.523599
chr1	152560001	152565000	0.362815
chr1	152640001	152645000	0.53354
chr1	152850001	152855000	0.702364
chr1	152940001	152945000	0.464816
chr1	153215001	153220000	0.545888
chr1	153290001	153295000	0.246076
chr1	153345001	153350000	0.530372
chr1	153495001	153500000	0.871941
chr1	153570001	153575000	0.502903
chr1	153665001	153670000	0.956965
chr1	153790001	153795000	0.728952
chr1	153925001	153930000	0.301178
chr1	153990001	153995000	1.38437
chr1	154175001	154180000	0.505338
chr1	154270001	154275000	0.949322
chr1	154335001	154340000	0.495156
chr1	154395001	154400000	0.227723
chr1	154470001	154475000	0.800453
chr1	154555001	154560000	1.1554
chr1	154665001	154670000	0.228479
chr1	154750001	154755000	0.276206
chr1	154875001	154880000	0.994159
chr1	154935001	154940000	0.737868
chr1	155085001	155090000	0.79042
chr1	155175001	155180000	0.853869
chr1	155245001	155250000	0.700824
chr1	155330001	155335000	0.948771
chr1	155490001	155495000	0.266305
chr1	155605001	155610000	0.665109
chr1	155740001	155745000	0.453458
chr1	155850001	155855000	0.377553
chr1	155915001	155920000	0.987198
chr1	156000001	156005000	0.621114
chr1	156070001	156075000	1.19214
chr1	156145001	156150000	1.35978
chr1	156225001	156230000	0.656302
chr1	156340001	156345000	1.11999
chr1	156455001	156460000	1.35817
chr1	156610001	156615000	0.675259
chr1	156720001	156725000	0.714267
chr1	156785001	156790000	0.638395
chr1	156890001	156895000	0.387252
chr1	157075001	157080000	0.884279
chr1	157170001	157175000	1.27448
chr1	157365001	157370000	0.462977
chr1	157490001	157495000	1.20887
chr1	157575001	157580000	0.520423
chr1	157700001	157705000	0.186869
chr1	157770001	157775000	0.278246
chr1	157865001	157870000	0.505338
chr1	157955001	157960000	0.514255
chr1	158130001	158135000	0.293015
chr1	158190001	158195000	0.315116
chr1	158360001	158365000	0.354321
chr1	158780001	158785000	0.324746
chr1	158850001	158855000	0.233202
chr1	159000001	159005000	1.36677
chr1	159085001	159090000	0.956188
chr1	159225001	159230000	0.859496
chr1	159775001	159780000	0.622534
chr1	159900001	159905000	0.360274
chr1	159925001	159930000	0.607563
chr1	160020001	160025000	0.960371
chr1	160095001	160100000	0.836038
chr1	160180001	160185000	0.540297
chr1	160265001	160270000	0.544108
chr1	160270001	160275000	0.544108
chr1	160285001	160290000	0.544108
chr1	160420001	160425000	1.07189
chr1	160540001	160545000	0.545841
chr1	160610001	160615000	1.15831
chr1	160675001	160680000	0.299963
chr1	160775001	160780000	0.367792
chr1	160835001	160840000	0.607727
chr1	160985001	160990000	0.461552
chr1	161155001	161160000	0.269401
chr1	161215001	161220000	0.654006
chr1	161305001	161310000	0.509106
chr1	161385001	161390000	0.905554
chr1	161445001	161450000	2.02271
chr1	161550001	161555000	0.622264
chr1	161650001	161655000	1.36658
chr1	161750001	161755000	1.02925
chr1	161960001	161965000	0.27407
chr1	162050001	162055000	0.376447
chr1	162395001	162400000	0.240464
chr1	162490001	162495000	0.511844
chr1	162565001	162570000	0.1874
chr1	162610001	162615000	0.417002
chr1	162845001	162850000	0.543537
chr1	163325001	163330000	0.556527
chr1	163335001	163340000	0.556527
chr1	163350001	163355000	0.556527
chr1	163530001	163535000	0.283939
chr1	164800001	164805000	0.214444
chr1	165365001	165370000	0.402521
chr1	165590001	165595000	1.05206
chr1	165700001	165705000	0.480958
chr1	165760001	165765000	0.317383
chr1	165825001	165830000	0.597989
chr1	165925001	165930000	1.12162
chr1	166190001	166195000	0.292522
chr1	166495001	166500000	0.262483
chr1	166830001	166835000	0.535241
chr1	166880001	166885000	0.563816
chr1	167055001	167060000	1.14064
chr1	167135001	167140000	0.254577
chr1	167215001	167220000	0.888763
chr1	167390001	167395000	0.381539
chr1	167440001	167445000	0.544033
chr1	167550001	167555000	0.757322
chr1	167710001	167715000	1.15751
chr1	167805001	167810000	0.413008
chr1	167920001	167925000	0.420993
chr1	168075001	168080000	0.359453
chr1	168145001	168150000	0.379738
chr1	168165001	168170000	0.379738
chr1	168235001	168240000	0.37376
chr1	168335001	168340000	0.350599
chr1	168430001	168435000	0.440988
chr1	168595001	168600000	0.546271
chr1	169010001	169015000	0.182212
chr1	169110001	169115000	0.527938
chr1	169360001	169365000	0.37228
chr1	169460001	169465000	0.518095
chr1	169545001	169550000	0.599241
chr1	169585001	169590000	0.397212
chr1	169715001	169720000	0.941682
chr1	169795001	169800000	0.483941
chr1	169925001	169930000	0.504815
chr1	170080001	170085000	0.620687
chr1	170515001	170520000	0.382953
chr1	170665001	170670000	0.276878
chr1	170935001	170940000	0.201678
chr1	171220001	171225000	0.51886
chr1	171320001	171325000	0.59307
chr1	171475001	171480000	0.792763
chr1	171645001	171650000	0.305931
chr1	171730001	171735000	0.343891
chr1	171795001	171800000	0.454774
chr1	171990001	171995000	0.49859
chr1	172085001	172090000	0.216572
chr1	172185001	172190000	0.298244
chr1	172265001	172270000	0.219596
chr1	172330001	172335000	0.408941
chr1	172410001	172415000	0.724696
chr1	172440001	172445000	0.446579
chr1	172530001	172535000	0.462084
chr1	172605001	172610000	0.239692
chr1	172730001	172735000	1.15448
chr1	172830001	172835000	0.509148
chr1	173195001	173200000	0.641766
chr1	173415001	173420000	1.38159
chr1	173495001	173500000	0.272431
chr1	173705001	173710000	0.336447
chr1	173820001	173825000	0.296513
chr1	173860001	173865000	0.413427
chr1	173930001	173935000	0.20241
chr1	174015001	174020000	0.273367
chr1	174085001	174090000	0.280479
chr1	174150001	174155000	0.441789
chr1	174250001	174255000	0.997769
chr1	174740001	174745000	0.574516
chr1	174875001	174880000	0.221538
chr1	175020001	175025000	1.20527
chr1	175145001	175150000	1.0459
chr1	175235001	175240000	0.196938
chr1	175325001	175330000	0.474054
chr1	175475001	175480000	0.294999
chr1	175890001	175895000	0.227169
chr1	176075001	176080000	0.262538
chr1	176215001	176220000	0.940381
chr1	176365001	176370000	0.253598
chr1	176535001	176540000	0.260157
chr1	176885001	176890000	0.425729
chr1	176960001	176965000	0.224553
chr1	177775001	177780000	0.280958
chr1	177940001	177945000	0.363172
chr1	178290001	178295000	0.458771
chr1	178360001	178365000	0.19287
chr1	178530001	178535000	1.07304
chr1	178605001	178610000	0.198563
chr1	178660001	178665000	0.218802
chr1	178760001	178765000	0.397569
chr1	179010001	179015000	0.901935
chr1	179080001	179085000	0.387882
chr1	179225001	179230000	0.3775
chr1	179290001	179295000	0.549184
chr1	179375001	179380000	1.15347
chr1	179685001	179690000	0.40604
chr1	179835001	179840000	1.00592
chr1	179950001	179955000	0.486823
chr1	180025001	180030000	0.273279
chr1	180100001	180105000	0.274488
chr1	180185001	180190000	0.341782
chr1	180250001	180255000	0.296746
chr1	180505001	180510000	0.906814
chr1	180630001	180635000	0.510179
chr1	180770001	180775000	0.226737
chr1	180865001	180870000	1.07484
chr1	181020001	181025000	0.558389
chr1	181075001	181080000	0.456671
chr1	181175001	181180000	1.48739
chr1	181425001	181430000	0.43197
chr1	181475001	181480000	0.421688
chr1	181675001	181680000	0.2325
chr1	181935001	181940000	0.311624
chr1	182070001	182075000	0.48347
chr1	182125001	182130000	0.363382
chr1	182395001	182400000	0.565203
chr1	182440001	182445000	0.244144
chr1	182585001	182590000	1.0846
chr1	182785001	182790000	0.883116
chr1	182835001	182840000	0.558582
chr1	182900001	182905000	0.378913
chr1	182955001	182960000	0.322846
chr1	183015001	183020000	0.515378
chr1	183240001	183245000	0.318096
chr1	183250001	183255000	0.318096
chr1	183260001	183265000	0.318096
chr1	183330001	183335000	0.227869
chr1	183460001	183465000	0.940913
chr1	183550001	183555000	0.293081
chr1	183640001	183645000	0.903331
chr1	183800001	183805000	0.429405
chr1	183920001	183925000	0.806605
chr1	184070001	184075000	0.529136
chr1	184235001	184240000	0.281567
chr1	184685001	184690000	0.47287
chr1	184755001	184760000	0.32479
chr1	184800001	184805000	0.637282
chr1	184980001	184985000	0.901831
chr1	185040001	185045000	0.262507
chr1	185170001	185175000	0.578139
chr1	185305001	185310000	0.660723
chr1	185440001	185445000	0.187465
chr1	185700001	185705000	0.498242
chr1	186145001	186150000	0.307193
chr1	186220001	186225000	0.280535
chr1	186225001	186230000	0.280535
chr1	186295001	186300000	0.842673
chr1	186400001	186405000	0.544494
chr1	186480001	186485000	0.46323
chr1	186600001	186605000	0.524551
chr1	186690001	186695000	0.341212
chr1	186695001	186700000	0.341212
chr1	186710001	186715000	0.341212
chr1	186815001	186820000	0.214665
chr1	186920001	186925000	0.432939
chr1	186995001	187000000	0.526489
chr1	187920001	187925000	0.427241
chr1	189200001	189205000	0.199946
chr1	191130001	191135000	0.347578
chr1	192460001	192465000	1.23714
chr1	192620001	192625000	1.02492
chr1	192800001	192805000	0.482896
chr1	193020001	193025000	0.706891
chr1	193130001	193135000	0.40034
chr1	193140001	193145000	0.40034
chr1	193400001	193405000	0.275829
chr1	194300001	194305000	0.349903
chr1	196140001	196145000	0.792807
chr1	196235001	196240000	0.704326
chr1	196745001	196750000	0.195513
chr1	196835001	196840000	0.31901
chr1	197070001	197075000	0.304527
chr1	197140001	197145000	0.201234
chr1	197205001	197210000	0.446689
chr1	197505001	197510000	0.32357
chr1	197930001	197935000	0.245936
chr1	198070001	198075000	0.225439
chr1	198150001	198155000	0.824265
chr1	198270001	198275000	0.284793
chr1	198360001	198365000	0.341703
chr1	198465001	198470000	0.282147
chr1	198595001	198600000	0.371599
chr1	198690001	198695000	0.844827
chr1	198765001	198770000	0.434447
chr1	198925001	198930000	0.372303
chr1	199105001	199110000	0.219136
chr1	199160001	199165000	0.225629
chr1	199250001	199255000	0.383243
chr1	200135001	200140000	0.381848
chr1	200270001	200275000	0.286463
chr1	200405001	200410000	0.2614
chr1	200495001	200500000	0.645062
chr1	200615001	200620000	0.979861
chr1	200670001	200675000	0.44665
chr1	200735001	200740000	0.28004
chr1	200805001	200810000	0.30279
chr1	200820001	200825000	0.30279
chr1	200825001	200830000	0.30279
chr1	200895001	200900000	0.252588
chr1	200965001	200970000	0.952468
chr1	201055001	201060000	0.666565
chr1	201135001	201140000	0.427648
chr1	201240001	201245000	0.464781
chr1	201360001	201365000	0.246412
chr1	201430001	201435000	0.56022
chr1	201545001	201550000	0.829422
chr1	201700001	201705000	0.594958
chr1	201815001	201820000	0.730787
chr1	201875001	201880000	0.477716
chr1	201990001	201995000	0.878299
chr1	202135001	202140000	0.567187
chr1	202180001	202185000	0.323853
chr1	202335001	202340000	0.719171
chr1	202450001	202455000	0.471721
chr1	202580001	202585000	0.497992
chr1	202630001	202635000	0.266631
chr1	202720001	202725000	0.492426
chr1	202880001	202885000	0.339402
chr1	203030001	203035000	0.768282
chr1	203260001	203265000	1.7819
chr1	203345001	203350000	1.61149
chr1	203500001	203505000	0.58901
chr1	203595001	203600000	0.385039
chr1	203705001	203710000	0.602974
chr1	203795001	203800000	0.455202
chr1	203870001	203875000	0.773794
chr1	204140001	204145000	0.506191
chr1	204220001	204225000	0.219832
chr1	204375001	204380000	0.930181
chr1	204390001	204395000	0.930181
chr1	204395001	204400000	0.930181
chr1	204510001	204515000	1.07928
chr1	204570001	204575000	0.618472
chr1	204815001	204820000	0.280251
chr1	204955001	204960000	0.513875
chr1	205070001	205075000	0.578588
chr1	205130001	205135000	0.313195
chr1	205260001	205265000	0.937275
chr1	205345001	205350000	1.15258
chr1	205490001	205495000	0.374582
chr1	205525001	205530000	0.387032
chr1	205580001	205585000	0.989133
chr1	205655001	205660000	0.970914
chr1	205780001	205785000	0.403603
chr1	205910001	205915000	0.422718
chr1	205980001	205985000	0.813483
chr1	206180001	206185000	1.1758
chr1	206185001	206190000	1.1758
chr1	206195001	206200000	1.1758
chr1	206240001	206245000	0.228819
chr1	206250001	206255000	0.228819
chr1	206290001	206295000	0.42585
chr1	206295001	206300000	0.42585
chr1	206350001	206355000	0.406303
chr1	206460001	206465000	0.500738
chr1	206605001	206610000	0.897568
chr1	206725001	206730000	1.16498
chr1	206815001	206820000	0.943257
chr1	206910001	206915000	0.756346
chr1	206990001	206995000	0.800692
chr1	207085001	207090000	0.627669
chr1	207310001	207315000	0.598573
chr1	207405001	207410000	0.978296
chr1	207495001	207500000	0.795707
chr1	207530001	207535000	0.741163
chr1	207580001	207585000	2.87758
chr1	207705001	207710000	0.357588
chr1	207805001	207810000	0.818065
chr1	207880001	207885000	1.21233
chr1	207995001	208000000	1.13085
chr1	208120001	208125000	0.450384
chr1	208250001	208255000	0.410129
chr1	208650001	208655000	0.373792
chr1	209055001	209060000	0.286586
chr1	209200001	209205000	0.488152
chr1	209250001	209255000	0.180393
chr1	209555001	209560000	0.604915
chr1	209625001	209630000	0.255845
chr1	209690001	209695000	0.382101
chr1	209750001	209755000	0.510671
chr1	209850001	209855000	0.818795
chr1	210130001	210135000	0.205911
chr1	210315001	210320000	0.583361
chr1	210410001	210415000	0.542317
chr1	210580001	210585000	0.343133
chr1	210655001	210660000	0.217655
chr1	211130001	211135000	0.23034
chr1	211255001	211260000	0.738182
chr1	211315001	211320000	0.398398
chr1	211390001	211395000	0.331126
chr1	211510001	211515000	0.552784
chr1	211575001	211580000	0.434371
chr1	211675001	211680000	1.21194
chr1	211830001	211835000	0.465715
chr1	211935001	211940000	0.268132
chr1	212045001	212050000	0.604486
chr1	212055001	212060000	0.604486
chr1	212285001	212290000	0.677223
chr1	212365001	212370000	0.30726
chr1	212465001	212470000	0.88197
chr1	212555001	212560000	0.516032
chr1	212620001	212625000	0.394344
chr1	212660001	212665000	0.316932
chr1	212790001	212795000	0.842864
chr1	212870001	212875000	0.245904
chr1	213005001	213010000	0.994924
chr1	213115001	213120000	0.369592
chr1	213240001	213245000	0.227976
chr1	213365001	213370000	0.183081
chr1	214190001	214195000	0.202808
chr1	214250001	214255000	0.65642
chr1	214335001	214340000	1.17246
chr1	214595001	214600000	0.357309
chr1	214670001	214675000	0.3594
chr1	215525001	215530000	0.419782
chr1	215630001	215635000	0.39817
chr1	217660001	217665000	0.458587
chr1	217970001	217975000	0.678666
chr1	218040001	218045000	0.28163
chr1	218275001	218280000	0.447603
chr1	218335001	218340000	0.205089
chr1	218530001	218535000	0.195853
chr1	219055001	219060000	0.33205
chr1	219180001	219185000	0.333654
chr1	219390001	219395000	0.401309
chr1	219575001	219580000	0.428229
chr1	219655001	219660000	0.211092
chr1	219820001	219825000	0.256719
chr1	219960001	219965000	0.59868
chr1	220105001	220110000	0.290024
chr1	220210001	220215000	0.65577
chr1	220285001	220290000	0.837105
chr1	220670001	220675000	0.472399
chr1	220805001	220810000	0.627725
chr1	220870001	220875000	0.239393
chr1	221030001	221035000	0.240541
chr1	221210001	221215000	0.325189
chr1	221440001	221445000	0.464268
chr1	221710001	221715000	0.424849
chr1	221840001	221845000	0.312759
chr1	222010001	222015000	0.230916
chr1	222095001	222100000	0.206791
chr1	222185001	222190000	0.202996
chr1	222460001	222465000	0.934799
chr1	222645001	222650000	0.838112
chr1	222725001	222730000	0.751051
chr1	222820001	222825000	0.291099
chr1	223085001	223090000	0.205045
chr1	223125001	223130000	0.519068
chr1	223260001	223265000	0.253047
chr1	223490001	223495000	0.377355
chr1	223685001	223690000	1.25765
chr1	223770001	223775000	0.570723
chr1	223915001	223920000	0.68191
chr1	223960001	223965000	0.345453
chr1	224110001	224115000	0.843818
chr1	224330001	224335000	0.491352
chr1	224510001	224515000	0.752748
chr1	224695001	224700000	0.221364
chr1	224855001	224860000	0.410303
chr1	224930001	224935000	0.241759
chr1	225475001	225480000	0.833088
chr1	225765001	225770000	0.532254
chr1	225915001	225920000	0.201509
chr1	225985001	225990000	1.33868
chr1	226060001	226065000	0.694284
chr1	226120001	226125000	1.19721
chr1	226200001	226205000	0.67984
chr1	226310001	226315000	0.211165
chr1	226410001	226415000	0.590593
chr1	226540001	226545000	0.238072
chr1	226620001	226625000	1.08109
chr1	226735001	226740000	0.390655
chr1	226830001	226835000	0.562355
chr1	227000001	227005000	0.306629
chr1	227465001	227470000	0.342993
chr1	227540001	227545000	0.369365
chr1	227720001	227725000	0.908242
chr1	227790001	227795000	0.453709
chr1	227970001	227975000	0.495761
chr1	228075001	228080000	0.628782
chr1	228200001	228205000	0.576286
chr1	228370001	228375000	0.316545
chr1	228455001	228460000	0.239251
chr1	228505001	228510000	0.251213
chr1	228870001	228875000	0.207252
chr1	229245001	229250000	0.835858
chr1	229340001	229345000	0.342702
chr1	229445001	229450000	0.375719
chr1	229485001	229490000	0.253754
chr1	229505001	229510000	0.253754
chr1	229550001	229555000	0.508813
chr1	229650001	229655000	0.910938
chr1	229715001	229720000	0.191732
chr1	230060001	230065000	0.650827
chr1	230210001	230215000	0.184368
chr1	230315001	230320000	0.645498
chr1	230625001	230630000	0.398863
chr1	230900001	230905000	0.398533
chr1	230990001	230995000	0.401717
chr1	231205001	231210000	0.531403
chr1	231335001	231340000	0.512862
chr1	231420001	231425000	0.511509
chr1	231530001	231535000	0.243462
chr1	231610001	231615000	0.582363
chr1	231735001	231740000	0.307358
chr1	231845001	231850000	0.427051
chr1	232635001	232640000	0.425592
chr1	232790001	232795000	0.216448
chr1	233295001	233300000	0.229014
chr1	233385001	233390000	0.348055
chr1	233435001	233440000	0.364866
chr1	233595001	233600000	0.388196
chr1	233705001	233710000	0.292595
chr1	233795001	233800000	0.485549
chr1	234080001	234085000	0.508956
chr1	234205001	234210000	0.479682
chr1	234320001	234325000	0.44512
chr1	234485001	234490000	0.955551
chr1	234600001	234605000	1.35072
chr1	234770001	234775000	0.452937
chr1	234835001	234840000	0.417709
chr1	234955001	234960000	0.362298
chr1	235010001	235015000	0.466933
chr1	235090001	235095000	1.64381
chr1	235245001	235250000	0.660669
chr1	235330001	235335000	0.516513
chr1	235420001	235425000	0.591496
chr1	235505001	235510000	0.833456
chr1	235780001	235785000	0.261896
chr1	235845001	235850000	0.551717
chr1	235975001	235980000	0.734921
chr1	236095001	236100000	0.998285
chr1	236290001	236295000	0.450974
chr1	236520001	236525000	0.51119
chr1	236605001	236610000	0.88436
chr1	236755001	236760000	0.330522
chr1	236900001	236905000	0.417864
chr1	236975001	236980000	0.342802
chr1	237030001	237035000	0.543395
chr1	237090001	237095000	0.306359
chr1	237575001	237580000	0.332578
chr1	237800001	237805000	0.182891
chr1	239375001	239380000	0.218432
chr1	239925001	239930000	0.447769
chr1	240015001	240020000	0.311909
chr1	240185001	240190000	0.19961
chr1	240715001	240720000	0.206832
chr1	241495001	241500000	0.976782
chr1	241635001	241640000	0.714418
chr1	241840001	241845000	0.38966
chr1	241890001	241895000	0.445871
chr1	242020001	242025000	0.459681
chr1	242445001	242450000	0.219579
chr1	242780001	242785000	0.215206
chr1	243010001	243015000	0.807372
chr1	243050001	243055000	0.808975
chr1	243250001	243255000	0.246591
chr1	243330001	243335000	1.31162
chr1	243415001	243420000	0.180237
chr1	243585001	243590000	0.242996
chr1	243700001	243705000	0.182088
chr1	243755001	243760000	0.440246
chr1	243850001	243855000	0.48405
chr1	244035001	244040000	0.28372
chr1	244290001	244295000	0.565529
chr1	244460001	244465000	0.869237
chr1	244595001	244600000	0.549158
chr1	244800001	244805000	0.695021
chr1	244860001	244865000	0.626688
chr1	244975001	244980000	0.521639
chr1	245060001	245065000	0.598574
chr1	245150001	245155000	0.337105
chr1	245800001	245805000	0.179813
chr1	245880001	245885000	0.25205
chr1	246010001	246015000	0.777239
chr1	246485001	246490000	0.562557
chr1	246560001	246565000	0.532622
chr1	246685001	246690000	0.496387
chr1	246770001	246775000	0.427359
chr1	246830001	246835000	0.304767
chr1	246965001	246970000	0.195523
chr1	247080001	247085000	0.379398
chr1	247215001	247220000	0.651136
chr1	247310001	247315000	0.339332
chr1	247320001	247325000	0.339332
chr1	247365001	247370000	0.438279
chr1	247495001	247500000	0.465106
chr1	247925001	247930000	0.45776
chr1	248215001	248220000	0.182416
chr1	248400001	248405000	1.03967
chr1	248530001	248535000	0.393049
chr1	248615001	248620000	0.847784
chr1	248685001	248690000	0.832387
chr1	248810001	248815000	1.04406
chr2	205001	210000	0.381101
chr2	305001	310000	0.494812
chr2	665001	670000	0.548702
chr2	1370001	1375000	0.211593
chr2	1375001	1380000	0.211593
chr2	1545001	1550000	0.316465
chr2	2845001	2850000	0.184483
chr2	3180001	3185000	0.21256
chr2	3305001	3310000	0.260325
chr2	3510001	3515000	0.228706
chr2	3575001	3580000	0.278779
chr2	3660001	3665000	0.657597
chr2	3825001	3830000	0.283239
chr2	4690001	4695000	0.241479
chr2	4775001	4780000	0.229056
chr2	5490001	5495000	0.181538
chr2	6360001	6365000	0.214789
chr2	6780001	6785000	0.441285
chr2	7035001	7040000	0.297068
chr2	7095001	7100000	0.479457
chr2	7195001	7200000	0.224064
chr2	7420001	7425000	0.484538
chr2	7675001	7680000	0.206261
chr2	7840001	7845000	0.200142
chr2	8225001	8230000	0.362574
chr2	8305001	8310000	0.628431
chr2	8405001	8410000	0.512888
chr2	8475001	8480000	0.487949
chr2	8540001	8545000	0.329701
chr2	8600001	8605000	0.196722
chr2	8685001	8690000	1.36362
chr2	8850001	8855000	0.407287
chr2	8990001	8995000	0.34915
chr2	9135001	9140000	0.478839
chr2	9410001	9415000	0.55781
chr2	9470001	9475000	0.220534
chr2	9550001	9555000	0.544832
chr2	9630001	9635000	0.369066
chr2	9800001	9805000	0.388584
chr2	9960001	9965000	0.398761
chr2	10050001	10055000	0.931147
chr2	10130001	10135000	0.963953
chr2	10275001	10280000	0.289486
chr2	10445001	10450000	0.851045
chr2	10685001	10690000	0.555805
chr2	10820001	10825000	0.943539
chr2	10920001	10925000	0.346147
chr2	11130001	11135000	0.661199
chr2	11225001	11230000	0.350416
chr2	11340001	11345000	0.332194
chr2	11460001	11465000	0.598258
chr2	11590001	11595000	0.452434
chr2	11680001	11685000	0.515301
chr2	11825001	11830000	0.522492
chr2	11940001	11945000	0.26139
chr2	12070001	12075000	0.211484
chr2	12410001	12415000	0.269444
chr2	12720001	12725000	0.280304
chr2	12945001	12950000	0.202827
chr2	13030001	13035000	0.360104
chr2	13190001	13195000	0.36254
chr2	13460001	13465000	0.217886
chr2	14890001	14895000	0.221776
chr2	15170001	15175000	0.297611
chr2	15595001	15600000	0.246249
chr2	15635001	15640000	0.437553
chr2	15930001	15935000	0.25845
chr2	16510001	16515000	0.227268
chr2	16610001	16615000	0.761175
chr2	16765001	16770000	0.579912
chr2	17315001	17320000	0.198128
chr2	17470001	17475000	0.200144
chr2	17645001	17650000	0.358695
chr2	17745001	17750000	0.297993
chr2	17845001	17850000	0.816882
chr2	18510001	18515000	0.293584
chr2	19365001	19370000	0.379375
chr2	19860001	19865000	0.501121
chr2	20105001	20110000	0.758615
chr2	20230001	20235000	0.712828
chr2	20350001	20355000	0.483914
chr2	20440001	20445000	0.607974
chr2	20510001	20515000	0.276496
chr2	20650001	20655000	1.1288
chr2	20825001	20830000	0.253833
chr2	21020001	21025000	0.42163
chr2	21030001	21035000	0.42163
chr2	21325001	21330000	0.193765
chr2	23305001	23310000	0.232981
chr2	23465001	23470000	0.379937
chr2	23790001	23795000	0.368351
chr2	23935001	23940000	0.560918
chr2	24080001	24085000	0.52239
chr2	24215001	24220000	0.368137
chr2	24300001	24305000	0.353182
chr2	24395001	24400000	1.07091
chr2	24485001	24490000	0.620046
chr2	24585001	24590000	0.399521
chr2	24825001	24830000	0.331719
chr2	24925001	24930000	0.19598
chr2	24970001	24975000	0.694693
chr2	25130001	25135000	0.405768
chr2	25200001	25205000	0.30728
chr2	25275001	25280000	0.191755
chr2	25345001	25350000	0.394978
chr2	25425001	25430000	0.476538
chr2	25520001	25525000	0.534265
chr2	25590001	25595000	0.663071
chr2	25680001	25685000	0.348017
chr2	25870001	25875000	0.5487
chr2	25950001	25955000	0.231681
chr2	25985001	25990000	0.214098
chr2	26155001	26160000	0.544285
chr2	26340001	26345000	0.476344
chr2	26585001	26590000	0.344793
chr2	26745001	26750000	0.510496
chr2	26825001	26830000	0.407944
chr2	26945001	26950000	0.831301
chr2	27025001	27030000	0.574753
chr2	27090001	27095000	0.645934
chr2	27210001	27215000	0.450055
chr2	27310001	27315000	0.404145
chr2	27360001	27365000	0.324097
chr2	27430001	27435000	0.254781
chr2	27490001	27495000	0.308674
chr2	27580001	27585000	0.457955
chr2	27625001	27630000	0.301113
chr2	27700001	27705000	0.526871
chr2	27880001	27885000	0.474129
chr2	28395001	28400000	0.337225
chr2	28560001	28565000	0.341656
chr2	28750001	28755000	0.567599
chr2	28805001	28810000	0.219116
chr2	28950001	28955000	0.89373
chr2	29200001	29205000	0.654276
chr2	29300001	29305000	0.207261
chr2	29910001	29915000	0.183129
chr2	30075001	30080000	0.41414
chr2	30155001	30160000	0.640967
chr2	30210001	30215000	0.507667
chr2	30340001	30345000	0.347434
chr2	30445001	30450000	0.444068
chr2	30635001	30640000	0.185197
chr2	30710001	30715000	0.881538
chr2	31160001	31165000	0.348719
chr2	31260001	31265000	0.242978
chr2	31340001	31345000	0.524761
chr2	31835001	31840000	0.480371
chr2	32010001	32015000	0.390063
chr2	32065001	32070000	0.29145
chr2	32160001	32165000	0.305788
chr2	32270001	32275000	0.188838
chr2	32355001	32360000	0.438843
chr2	32545001	32550000	0.426049
chr2	32630001	32635000	0.278709
chr2	32770001	32775000	0.295867
chr2	32950001	32955000	0.357821
chr2	33270001	33275000	0.280281
chr2	33375001	33380000	0.349754
chr2	33450001	33455000	0.723179
chr2	33455001	33460000	0.723179
chr2	33460001	33465000	0.723179
chr2	33600001	33605000	0.880618
chr2	34095001	34100000	0.286175
chr2	34525001	34530000	0.214842
chr2	34745001	34750000	0.215563
chr2	35720001	35725000	0.370744
chr2	35800001	35805000	0.375759
chr2	35950001	35955000	0.258958
chr2	36345001	36350000	0.679444
chr2	36515001	36520000	0.372823
chr2	36605001	36610000	0.183237
chr2	36670001	36675000	0.296942
chr2	36770001	36775000	0.22977
chr2	36965001	36970000	0.302667
chr2	37075001	37080000	0.205111
chr2	37155001	37160000	0.603828
chr2	37240001	37245000	0.197593
chr2	37315001	37320000	0.273588
chr2	37405001	37410000	1.02737
chr2	37530001	37535000	0.465752
chr2	37670001	37675000	0.515109
chr2	37820001	37825000	0.466667
chr2	37885001	37890000	0.704919
chr2	37975001	37980000	0.351549
chr2	38110001	38115000	0.287443
chr2	38185001	38190000	0.256605
chr2	38280001	38285000	0.829279
chr2	38375001	38380000	0.30951
chr2	38530001	38535000	0.536847
chr2	38590001	38595000	0.786147
chr2	38740001	38745000	1.02427
chr2	39050001	39055000	0.714694
chr2	39130001	39135000	0.545231
chr2	39235001	39240000	0.699328
chr2	39370001	39375000	0.358498
chr2	39525001	39530000	0.405947
chr2	39730001	39735000	0.318018
chr2	39780001	39785000	0.49066
chr2	41405001	41410000	0.18947
chr2	41695001	41700000	0.376253
chr2	41825001	41830000	0.38627
chr2	42090001	42095000	1.62519
chr2	42250001	42255000	0.22847
chr2	42360001	42365000	0.42675
chr2	42485001	42490000	0.406666
chr2	42665001	42670000	0.39939
chr2	42815001	42820000	0.820929
chr2	42945001	42950000	0.47935
chr2	43120001	43125000	0.697028
chr2	43230001	43235000	1.38164
chr2	43385001	43390000	0.314841
chr2	43485001	43490000	0.876971
chr2	43610001	43615000	0.636562
chr2	43875001	43880000	0.516448
chr2	44000001	44005000	0.509995
chr2	44080001	44085000	0.307696
chr2	44165001	44170000	0.670527
chr2	44240001	44245000	0.607968
chr2	44360001	44365000	0.210948
chr2	44385001	44390000	0.232276
chr2	44480001	44485000	0.526263
chr2	44550001	44555000	0.24303
chr2	44660001	44665000	0.249037
chr2	44955001	44960000	0.424837
chr2	45495001	45500000	0.584739
chr2	45575001	45580000	0.201472
chr2	45640001	45645000	0.745253
chr2	45735001	45740000	0.27623
chr2	45830001	45835000	0.298213
chr2	45980001	45985000	0.25961
chr2	46060001	46065000	0.276237
chr2	46170001	46175000	0.232686
chr2	46300001	46305000	0.202855
chr2	46370001	46375000	0.462991
chr2	46460001	46465000	1.0021
chr2	46545001	46550000	0.49961
chr2	46650001	46655000	0.64748
chr2	46775001	46780000	0.416682
chr2	46900001	46905000	0.736849
chr2	46985001	46990000	0.841725
chr2	47175001	47180000	0.405862
chr2	47260001	47265000	0.271584
chr2	47325001	47330000	1.26856
chr2	47405001	47410000	0.631038
chr2	47525001	47530000	0.195621
chr2	47650001	47655000	0.224619
chr2	47780001	47785000	1.13554
chr2	47915001	47920000	0.76175
chr2	48105001	48110000	0.878171
chr2	48200001	48205000	0.26851
chr2	48310001	48315000	0.750341
chr2	48440001	48445000	0.957054
chr2	48535001	48540000	0.345299
chr2	48595001	48600000	0.366813
chr2	48760001	48765000	0.223573
chr2	48940001	48945000	0.380734
chr2	49050001	49055000	0.233394
chr2	50500001	50505000	0.329466
chr2	52495001	52500000	0.426376
chr2	52570001	52575000	0.448642
chr2	53405001	53410000	0.245498
chr2	53790001	53795000	0.343101
chr2	53870001	53875000	0.211166
chr2	53970001	53975000	0.380415
chr2	54050001	54055000	0.215127
chr2	54115001	54120000	0.536203
chr2	54510001	54515000	1.02164
chr2	54715001	54720000	0.494149
chr2	54850001	54855000	0.279303
chr2	54855001	54860000	0.279303
chr2	54860001	54865000	0.279303
chr2	55000001	55005000	0.260202
chr2	55050001	55055000	0.510314
chr2	55175001	55180000	0.402071
chr2	55225001	55230000	0.452711
chr2	55425001	55430000	0.751523
chr2	55515001	55520000	0.365085
chr2	55615001	55620000	0.462483
chr2	55700001	55705000	1.11722
chr2	56015001	56020000	0.195302
chr2	56180001	56185000	0.298499
chr2	57525001	57530000	0.293851
chr2	57710001	57715000	0.369486
chr2	57755001	57760000	0.345082
chr2	57905001	57910000	0.698617
chr2	58050001	58055000	0.239383
chr2	58250001	58255000	0.692141
chr2	58565001	58570000	0.241456
chr2	58755001	58760000	0.179304
chr2	60300001	60305000	0.341022
chr2	60440001	60445000	0.400835
chr2	60560001	60565000	0.96528
chr2	60675001	60680000	0.386364
chr2	60785001	60790000	0.668517
chr2	60895001	60900000	0.820793
chr2	61010001	61015000	0.814942
chr2	61175001	61180000	0.401298
chr2	61405001	61410000	0.375831
chr2	61480001	61485000	0.6224
chr2	61535001	61540000	0.726962
chr2	61665001	61670000	0.51398
chr2	61680001	61685000	0.51398
chr2	61690001	61695000	0.51398
chr2	61790001	61795000	0.324093
chr2	61855001	61860000	0.253174
chr2	61900001	61905000	0.75087
chr2	61990001	61995000	0.640971
chr2	62140001	62145000	0.433342
chr2	62200001	62205000	0.788635
chr2	62295001	62300000	0.423017
chr2	62415001	62420000	1.04335
chr2	62695001	62700000	0.376287
chr2	62785001	62790000	0.53906
chr2	63055001	63060000	0.442726
chr2	63590001	63595000	0.309273
chr2	63685001	63690000	0.249869
chr2	63835001	63840000	0.226887
chr2	64030001	64035000	0.74751
chr2	64140001	64145000	0.494126
chr2	64215001	64220000	0.565448
chr2	64330001	64335000	1.14749
chr2	64510001	64515000	0.801315
chr2	64580001	64585000	0.590111
chr2	64645001	64650000	0.990645
chr2	64750001	64755000	0.596162
chr2	64865001	64870000	0.713293
chr2	64910001	64915000	0.733253
chr2	64995001	65000000	0.635014
chr2	65055001	65060000	1.28406
chr2	65230001	65235000	0.360301
chr2	65440001	65445000	0.970282
chr2	65575001	65580000	0.320258
chr2	65605001	65610000	0.406937
chr2	65620001	65625000	0.406937
chr2	65625001	65630000	0.406937
chr2	65720001	65725000	0.241297
chr2	66410001	66415000	0.183317
chr2	66590001	66595000	0.191209
chr2	67840001	67845000	0.220025
chr2	68030001	68035000	0.640139
chr2	68120001	68125000	0.60791
chr2	68175001	68180000	0.279111
chr2	68265001	68270000	0.8862
chr2	68280001	68285000	0.8862
chr2	68355001	68360000	1.09519
chr2	68455001	68460000	1.56687
chr2	68685001	68690000	0.354692
chr2	68840001	68845000	0.450027
chr2	68935001	68940000	0.590101
chr2	69010001	69015000	0.219889
chr2	69305001	69310000	0.880838
chr2	69375001	69380000	0.249848
chr2	69435001	69440000	0.308213
chr2	69555001	69560000	0.619288
chr2	69640001	69645000	0.45432
chr2	69715001	69720000	1.28269
chr2	69830001	69835000	0.8238
chr2	69910001	69915000	0.743334
chr2	70070001	70075000	1.27855
chr2	70145001	70150000	1.2454
chr2	70300001	70305000	1.21949
chr2	70650001	70655000	0.276683
chr2	70785001	70790000	0.318145
chr2	70850001	70855000	0.485187
chr2	70955001	70960000	0.667421
chr2	71000001	71005000	0.315798
chr2	71155001	71160000	0.681464
chr2	71290001	71295000	0.348757
chr2	71445001	71450000	0.390843
chr2	71530001	71535000	0.669384
chr2	71610001	71615000	0.272644
chr2	71920001	71925000	0.197819
chr2	72155001	72160000	0.235656
chr2	72580001	72585000	0.197192
chr2	72750001	72755000	0.678941
chr2	72875001	72880000	1.00682
chr2	72985001	72990000	0.475939
chr2	73075001	73080000	0.547184
chr2	73210001	73215000	0.410864
chr2	73290001	73295000	0.64625
chr2	73380001	73385000	0.444438
chr2	73615001	73620000	0.239194
chr2	73740001	73745000	0.929819
chr2	73820001	73825000	1.28281
chr2	73915001	73920000	0.493852
chr2	73985001	73990000	0.263338
chr2	74140001	74145000	0.609623
chr2	74220001	74225000	0.798382
chr2	74345001	74350000	0.358355
chr2	74390001	74395000	0.369735
chr2	74455001	74460000	0.384121
chr2	74595001	74600000	0.731827
chr2	74680001	74685000	0.396304
chr2	74825001	74830000	0.31928
chr2	74895001	74900000	0.692566
chr2	74990001	74995000	0.214874
chr2	75055001	75060000	0.365087
chr2	75280001	75285000	0.185509
chr2	75400001	75405000	0.488246
chr2	75470001	75475000	0.635769
chr2	75625001	75630000	0.953013
chr2	75710001	75715000	0.593531
chr2	75780001	75785000	0.44385
chr2	75900001	75905000	0.197214
chr2	76615001	76620000	0.221507
chr2	79000001	79005000	0.331626
chr2	80450001	80455000	0.219404
chr2	81860001	81865000	0.205947
chr2	82305001	82310000	0.207431
chr2	84000001	84005000	0.28407
chr2	84315001	84320000	0.255752
chr2	84410001	84415000	0.295063
chr2	84460001	84465000	0.212065
chr2	84870001	84875000	0.596144
chr2	84920001	84925000	0.482066
chr2	85055001	85060000	0.803114
chr2	85310001	85315000	0.643361
chr2	85420001	85425000	0.543747
chr2	85540001	85545000	0.776251
chr2	85615001	85620000	0.595703
chr2	85720001	85725000	0.788857
chr2	85820001	85825000	1.35742
chr2	85895001	85900000	0.548667
chr2	86085001	86090000	0.608408
chr2	86200001	86205000	0.879818
chr2	86305001	86310000	0.244938
chr2	86375001	86380000	0.216612
chr2	86440001	86445000	0.5709
chr2	86625001	86630000	0.613876
chr2	86720001	86725000	0.535134
chr2	86805001	86810000	0.361212
chr2	87055001	87060000	2.90003
chr2	87115001	87120000	0.594931
chr2	87210001	87215000	1.41013
chr2	87310001	87315000	0.467913
chr2	87375001	87380000	2.10086
chr2	87435001	87440000	0.759416
chr2	87520001	87525000	1.53429
chr2	87605001	87610000	1.76548
chr2	87615001	87620000	1.76548
chr2	87620001	87625000	1.76548
chr2	87625001	87630000	1.76548
chr2	87680001	87685000	0.235037
chr2	87875001	87880000	0.642995
chr2	87935001	87940000	3.22462
chr2	87995001	88000000	0.542119
chr2	88060001	88065000	0.43799
chr2	88180001	88185000	0.430705
chr2	88555001	88560000	0.851761
chr2	88685001	88690000	0.784449
chr2	88735001	88740000	0.394824
chr2	88825001	88830000	1.38118
chr2	88860001	88865000	1.03312
chr2	89040001	89045000	0.659187
chr2	89075001	89080000	0.228069
chr2	89160001	89165000	0.311886
chr2	89210001	89215000	0.273248
chr2	89255001	89260000	0.851726
chr2	89280001	89285000	1.49923
chr2	89850001	89855000	2.57794
chr2	89905001	89910000	0.736209
chr2	90085001	90090000	0.277818
chr2	90135001	90140000	0.659426
chr2	90275001	90280000	2.86771
chr2	91500001	91505000	2.04901
chr2	91510001	91515000	2.04901
chr2	91525001	91530000	2.04901
chr2	91605001	91610000	1.92002
chr2	91630001	91635000	2.12351
chr2	91795001	91800000	1.47199
chr2	91825001	91830000	1.88529
chr2	91880001	91885000	0.229652
chr2	94570001	94575000	0.632696
chr2	94860001	94865000	0.261145
chr2	94970001	94975000	0.741382
chr2	95115001	95120000	0.445622
chr2	95215001	95220000	0.338131
chr2	95525001	95530000	0.265972
chr2	95725001	95730000	0.379504
chr2	95795001	95800000	1.21664
chr2	95990001	95995000	0.541318
chr2	96020001	96025000	1.26539
chr2	96110001	96115000	1.22517
chr2	96195001	96200000	0.715587
chr2	96265001	96270000	0.898632
chr2	96360001	96365000	0.664887
chr2	96475001	96480000	0.184339
chr2	96550001	96555000	0.3482
chr2	96635001	96640000	0.204792
chr2	96730001	96735000	0.262639
chr2	96815001	96820000	0.31194
chr2	96855001	96860000	0.493786
chr2	96995001	97000000	0.582686
chr2	97115001	97120000	0.733935
chr2	97245001	97250000	3.85178
chr2	97585001	97590000	0.954643
chr2	97705001	97710000	0.603566
chr2	97805001	97810000	0.393619
chr2	98025001	98030000	0.61811
chr2	98400001	98405000	1.04352
chr2	98615001	98620000	0.683632
chr2	98625001	98630000	0.683632
chr2	98635001	98640000	0.683632
chr2	98840001	98845000	0.400372
chr2	99065001	99070000	0.449918
chr2	99185001	99190000	0.424648
chr2	99325001	99330000	0.646836
chr2	99495001	99500000	0.867009
chr2	99540001	99545000	0.194921
chr2	100070001	100075000	0.199802
chr2	100255001	100260000	0.658683
chr2	100375001	100380000	0.402746
chr2	100425001	100430000	0.232492
chr2	100555001	100560000	0.286955
chr2	100605001	100610000	0.444355
chr2	101000001	101005000	0.764194
chr2	101155001	101160000	0.358742
chr2	101240001	101245000	0.539733
chr2	101320001	101325000	0.703226
chr2	101325001	101330000	0.703226
chr2	101685001	101690000	0.220343
chr2	101760001	101765000	0.346206
chr2	101845001	101850000	0.301721
chr2	101875001	101880000	0.267035
chr2	102005001	102010000	0.823817
chr2	102240001	102245000	0.691376
chr2	102350001	102355000	0.640734
chr2	102455001	102460000	0.987371
chr2	102615001	102620000	0.381111
chr2	102710001	102715000	0.2925
chr2	102820001	102825000	0.387613
chr2	103025001	103030000	0.220518
chr2	104825001	104830000	0.260581
chr2	104880001	104885000	0.236682
chr2	105030001	105035000	0.417851
chr2	105105001	105110000	0.530752
chr2	105245001	105250000	0.48429
chr2	105360001	105365000	0.601118
chr2	105555001	105560000	0.430785
chr2	105735001	105740000	0.669131
chr2	105920001	105925000	0.270323
chr2	106100001	106105000	0.812324
chr2	106205001	106210000	0.627589
chr2	106440001	106445000	0.609938
chr2	106590001	106595000	0.298253
chr2	107875001	107880000	1.34844
chr2	108190001	108195000	0.216882
chr2	108335001	108340000	0.24195
chr2	108445001	108450000	0.382239
chr2	108530001	108535000	0.205203
chr2	108585001	108590000	0.772971
chr2	108665001	108670000	0.410516
chr2	108720001	108725000	0.366983
chr2	108860001	108865000	0.185809
chr2	108870001	108875000	0.185809
chr2	109120001	109125000	0.552642
chr2	109210001	109215000	0.240193
chr2	109270001	109275000	0.206239
chr2	109285001	109290000	0.206239
chr2	109290001	109295000	0.206239
chr2	109515001	109520000	0.822557
chr2	109730001	109735000	4.74154
chr2	110120001	110125000	1.54784
chr2	110175001	110180000	1.08702
chr2	110280001	110285000	4.26013
chr2	110665001	110670000	0.479303
chr2	110760001	110765000	0.550347
chr2	110800001	110805000	0.344447
chr2	110870001	110875000	0.181735
chr2	111025001	111030000	0.262559
chr2	111115001	111120000	1.02698
chr2	111290001	111295000	0.576613
chr2	111345001	111350000	0.773654
chr2	111385001	111390000	1.51135
chr2	111460001	111465000	0.715456
chr2	111570001	111575000	0.622352
chr2	111745001	111750000	0.811754
chr2	111880001	111885000	0.693925
chr2	112050001	112055000	0.975808
chr2	112115001	112120000	0.355693
chr2	112255001	112260000	0.472634
chr2	112315001	112320000	0.340463
chr2	112320001	112325000	0.340463
chr2	112405001	112410000	3.06161
chr2	112585001	112590000	0.732799
chr2	112740001	112745000	1.00896
chr2	112885001	112890000	0.509641
chr2	112965001	112970000	0.305773
[truncated: 12,766 more rows]
