# Supplementary material for: An integrative TAD catalog in lymphoblastoid cell lines discloses the functional impact of deletions and insertions in human genomes
Source: HighWire-hosted journal article supplement (doi:10.1101/gr.279419.124), 2024-12-01
Supplement: Supplemental_Table_S4.xlsx [file Supplemental_Table_S4.xlsx]

## Sheet: Table S4
Table S4. The comparison between our Integrative Catalog of TADs and the published TADs of human GM12878 released by ENCODE
	LCLs catalog	GM12878 (Rao, et al)
Calling resolution (kb)	5	5
TAD_min_size (kb)	20	60
TAD_max_size (kb)	7265	3310
TAD_mean_size (kb)	281.56	264.48
TAD_median_size (kb)	150	185
TAD_number_count	18865	10044
