# Supplementary material for: An integrative TAD catalog in lymphoblastoid cell lines discloses the functional impact of deletions and insertions in human genomes
Source: HighWire-hosted journal article supplement (doi:10.1101/gr.279419.124), 2024-12-01
Supplement: Supplemental_Table_S5.xlsx [file Supplemental_Table_S5.xlsx]

## Sheet: Table S6
Table S5. Summary statistics of the SVs' associated test with boundary scores
Deletions (Insertions is attached after deletions starting from row 1798)
CHROM	START_POS	END_POS	INFO_ID	BOUND_CHR	FLANK_START	FLANK_END	BOUND_SCORE	GM18534	GM18939	GM19036	GM19240	GM19650	GM19833	GM20509	GM20847	HG00096	HG00171	HG00514	HG00733	HG00864	HG01114	HG01505	HG01573	HG01596	HG02011	HG02018	HG02492	HG02587	HG03009	HG03065	HG03371	HG03683	HG03732	num_NaNs	pvalue_0_1	qvalue
chr1	872670	872879	chr1-872670-DEL-210	chr1	855001	880000	0.355466	0	0	0	1.42679	0.996747	0.712648	0	0	1.12301	1.42206	0.662974	1.05898	0.865719	0	1.01782	0	0.996942	0.787516	0.514748	0	1.57872	0.548503	1.16338	0.496668	0	1.2591	9	0.105351	0.105351
chr1	976738	977055	chr1-976738-DEL-318	chr1	965001	990000	0.570913	1.29645	0.764313	1.09505	1.15122	0.96421	0.85145	0.741623	1.15431	1.08769	0.982648	0.510283	0	1.32936	0.399332	1.39238	1.59726	0.900502	1.29266	1.52259	1.21651	1.57682	0.772804	1.10106	0	0.845969	0.62701	2	0.251906	0.251906
chr1	977944	978002	chr1-977944-DEL-59	chr1	965001	990000	0.570913	1.29645	0.764313	1.09505	1.15122	0.96421	0.85145	0.741623	1.15431	1.08769	0.982648	0.510283	0	1.32936	0.399332	1.39238	1.59726	0.900502	1.29266	1.52259	1.21651	1.57682	0.772804	1.10106	0	0.845969	0.62701	2	0.764841	0.764841
chr1	1108789	1108847	chr1-1108789-DEL-59	chr1	1100001	1125000	0.441434	1.63218	1.18226	1.07372	0.752957	1.36905	1.08948	1.32171	1.63235	0	1.03193	1.25516	1.37042	0	0.933692	1.55664	1.36467	1.20038	1.15327	1.1519	0	1.40579	0.87548	0	0.96887	0	1.04934	5	0.279225	0.279225
chr1	1632356	1699610	chr1-1632356-DEL-67255	chr1	1610001	1635000	0.272615	0	1.21849	0.454212	0.959434	0.505637	0	0.805376	0	0	0.325742	0.591383	0.918723	0	1.06113	0	0	0	0.297019	0.515925	0.36814	0	0.558776	0	1.01744	0.391361	0.3797	10	0.692499	0.865552
chr1	1632356	1699610	chr1-1632356-DEL-67255	chr1	1685001	1710000	0.248481	0	0	0	0	0.407614	0	0	0	0	0	0	0	0.445003	1.05613	0.596754	0	0	0	0	0.197691	0	0	0	0.519651	0	0	20	0.865552	0.865552
chr1	2060450	2060515	chr1-2060450-DEL-66	chr1	2040001	2065000	0.227214	0.385512	0	0.446568	0.34295	0	0.74463	0.628519	0.587435	0.605502	0.587006	0.470763	0.558443	0.78076	0.69226	0.292424	0.605797	0.733223	1.02672	0.859108	0.933585	0.432337	0.539285	0.376873	0	0	0	5	0.0476224	0.0476224
chr1	2592354	2592560	chr1-2592354-DEL-207	chr1	2575001	2600000	0.535163	0	0	0	0	0	0.154545	0	0	0	0	0	0	0	0	0	0	0	0	2.68149	0	0	0	0	0	0.11787	0	23	0.530782	0.530782
chr1	3433483	3433560	chr1-3433483-DEL-78	chr1	3415001	3440000	0.286909	0.549189	0.713864	0.8582	1.47748	1.23606	0.554308	0.855355	0.927601	0	0.38233	0.530105	0	0.609997	0	0.811224	0	0.304014	0.552539	0.576057	0	0.934302	0.893386	0	0.733631	0.23186	1.21208	6	0.305786	0.305786
chr1	3493136	3493198	chr1-3493136-DEL-63	chr1	3480001	3505000	0.258732	0	0	0.623045	0	0.451856	0.565427	0	0	0	0	0	0.267979	0.87219	1.00409	0	0	0.41273	0	0.356649	0.949622	0	0	0	0	0.712726	0.340354	15	0.777714	0.777714
chr1	3739485	3739556	chr1-3739485-DEL-72	chr1	3730001	3755000	0.290985	1.0616	0.960217	0.863466	0.746965	0.998207	0.719636	0.837964	0	0	0	0	0.903314	0	0	0.683436	0	0	0.617053	1.05483	0.308428	0.212151	0.677249	0.970933	0.824273	0.618146	1.11336	8	0.224232	0.224232
chr1	6798596	6798772	chr1-6798596-DEL-177	chr1	6775001	6800000	0.654571	0.771156	1.07351	1.47712	0.591509	1.24796	0.854031	0.917081	1.33001	1.00056	0.994576	1.02358	0.841684	1.26856	0.783038	0.569866	0	1.28785	1.07518	1.02526	1.05312	1.70039	1.24175	1.90883	0.973106	0.924825	1.11201	1	0.0952457	0.0952457
chr1	10422424	10423722	chr1-10422424-DEL-1299	chr1	10415001	10440000	0.600473	0.645249	0.79276	0.349556	0.660436	0.444489	0.385463	0.527042	0.819667	0.440424	0.938914	0.564083	0.650929	0.644995	1.12546	0.869657	0.457537	0.726623	0.70046	0	0.589792	0.528062	0.392791	0.775419	0.557591	0.628994	0.522491	1	0.879847	0.879847
chr1	15038928	15039037	chr1-15038928-DEL-110	chr1	15035001	15060000	0.188417	0.421068	0.706172	0.375247	0	0.605146	1.0229	0.648852	0.318307	0.869619	0.882903	0.574803	0	0.475522	0	0.589685	0.491724	0	0.556419	0.495293	0	1.01763	0.437975	0	0.528393	0	0.377233	7	0.560362	0.560362
chr1	15050029	15050093	chr1-15050029-DEL-65	chr1	15035001	15060000	0.188417	0.421068	0.706172	0.375247	0	0.605146	1.0229	0.648852	0.318307	0.869619	0.882903	0.574803	0	0.475522	0	0.589685	0.491724	0	0.556419	0.495293	0	1.01763	0.437975	0	0.528393	0	0.377233	7	0.285675	0.285675
chr1	17241452	17241739	chr1-17241452-DEL-288	chr1	17235001	17260000	0.375144	0	0.785966	1.01203	0	0.923984	1.12746	0.922463	0.869508	0	0.714479	1.06783	0.724738	1.15321	1.07887	0.735337	1.19479	0.732297	0.69232	1.06883	0.97424	1.64443	0.91271	0.676373	1.22722	0.774068	1.15826	3	0.672262	0.672262
chr1	18597997	18598210	chr1-18597997-DEL-214	chr1	18575001	18600000	0.380855	0.471724	0.881669	0.77268	0.69359	0.944303	1.77453	0.809334	0.858346	0.993631	0.890671	0.564893	1.03384	0.993178	1.0872	0.910235	0.917982	0.683825	0.703211	0.832055	0.679548	1.12987	0.73754	0.907322	0.743246	0.710012	1.0386	0	0.82009	0.82009
chr1	19642974	19643117	chr1-19642974-DEL-144	chr1	19640001	19665000	0.79772	0.827926	1.08398	0.802173	1.08234	0.908476	0.911574	1.11363	0.991334	0.98222	0.816106	1.02812	0.91712	0.929824	0.857954	1.39562	0.77403	1.1811	0.970599	0.930429	1.43102	1.78064	1.218	0.61359	1.11532	0.706751	1.33242	0	0.63402	0.63402
chr1	21389023	21389149	chr1-21389023-DEL-127	chr1	21365001	21390000	0.797679	1.62709	2.04466	1.65026	1.88139	1.56017	1.57253	1.85865	1.74412	1.96599	1.7259	1.63535	1.17682	1.448	1.51736	2.18637	2.19999	1.53447	1.64145	1.11645	1.87269	2.08804	2.06887	1.43954	1.86096	1.94043	1.76871	0	0.721104	0.721104
chr1	22659286	22659339	chr1-22659286-DEL-54	chr1	22655001	22680000	0.493922	0.843866	1.27047	0	1.05676	1.06679	1.13765	0.8639	0.896862	0.92792	0.902146	1.09828	1.04141	1.4876	1.55796	0.908881	0.852687	1.28653	0.932402	0	0	1.05783	1.08075	1.124	1.10436	0	1.01894	4	0.420968	0.420968
chr1	24832197	24835018	chr1-24832197-DEL-2822	chr1	24830001	24855000	1.261	2.02445	2.71695	2.06464	2.51898	2.75756	2.33825	2.27137	1.88795	1.88811	2.54364	2.39247	2.22752	2.37692	2.1233	1.91551	2.64318	1.91644	1.89074	2.38439	2.09744	2.64125	2.11616	2.59027	2.96822	1.74592	2.05237	0	0.0769231	0.0769231
chr1	25266047	25336374	chr1-25266047-DEL-70328	chr1	25330001	25355000	0.656128	1.3232	0	0	0	0.953949	0	0	0	0	1.31083	0.278999	1.48359	0	2.02965	0	0	0	0	0	0	0	0	0.56303	1.70326	1.47638	1.63043	16	0.443029	0.443029
chr1	26163322	26163647	chr1-26163322-DEL-326	chr1	26155001	26180000	0.92526	1.42877	1.69729	1.31065	1.47487	1.67619	1.43374	1.21733	1.68278	1.56899	1.40563	1.26623	1.75419	1.44867	0	1.84538	1.41333	1.57709	1.42585	1.71845	1.9717	1.59728	1.244	1.08046	1.33857	1.59958	1.86057	1	0.75786	0.75786
chr1	26345015	26345065	chr1-26345015-DEL-51	chr1	26335001	26360000	0.477061	0.702661	0.416882	0.90228	0.787742	0	0.794386	0.634898	0.458438	1.1072	1.20154	0	0.739299	0.490946	0.537831	0.880489	0.766724	0.429114	0.443963	0	1.33357	0.209166	0.54828	0.741433	0.598226	0.455148	0.526149	3	1	1
chr1	26596327	26596407	chr1-26596327-DEL-81	chr1	26590001	26615000	0.966969	1.58534	1.58607	1.98861	1.92707	1.69393	1.56859	1.48433	1.27123	1.65781	1.24908	1.62817	1.50265	1.72546	1.5628	1.64269	1.87431	1.35722	1.55714	1.49805	1.36747	1.40019	1.20669	1.59987	1.96026	1.35382	1.78718	0	0.622736	0.622736
chr1	27608854	27608986	chr1-27608854-DEL-133	chr1	27590001	27615000	1.18822	1.16162	1.29162	0.722837	1.50591	1.22242	0.985029	1.22655	1.25099	1.19231	1.29101	1.01353	0.967486	1.19867	1.29533	1.28816	1.71507	1.10656	1.26048	1.20948	0.870243	1.20504	0.865075	1.36085	1.28033	1.18101	1.024	0	0.00644729	0.00644729
chr1	27853407	27853977	chr1-27853407-DEL-571	chr1	27830001	27855000	1.00966	1.20784	1.66987	2.15604	1.82804	1.74607	1.53313	1.18725	2.03097	1.58044	1.32453	1.40872	1.51671	1.21881	1.69075	1.18034	1.94683	1.63283	1.42016	1.6815	1.45252	1.84204	1.62572	1.85703	1.65767	1.75564	2.02802	0	0.769231	0.769231
chr1	31546339	31546390	chr1-31546339-DEL-52	chr1	31540001	31565000	1.01986	1.69259	1.75141	2.06272	2.36827	2.03831	1.97676	1.8805	2.25102	1.94924	1.69169	1.44164	1.90235	1.9095	1.94495	1.90857	1.82555	2.10362	1.78587	1.91985	1.76171	2.19511	1.95811	1.85642	2.06445	1.83961	2.11953	0	0.45703	0.45703
chr1	32691161	32691337	chr1-32691161-DEL-177	chr1	32680001	32705000	0.486619	1.19909	0.899268	1.12329	1.35093	0.975962	0.839739	0.517594	0.727747	0	0.840488	0.901296	0.828456	1.10306	1.38574	0.693749	1.13418	0	1.17617	1.05617	1.24219	1.27966	1.16252	1.04261	0	1.18968	1.42969	3	0.899787	0.899787
chr1	36213944	36214013	chr1-36213944-DEL-70	chr1	36205001	36230000	0.306832	0.28385	0.30743	0.652306	0.520505	0	0.202409	0.535329	0.68365	0.177953	0	0.498936	0.385473	0.59576	0.793492	0.364187	0.526209	0.691676	0	0.547472	0.416781	0.334498	0	1.01096	0	0	0.681927	6	0.777714	0.777714
chr1	36571788	36571995	chr1-36571788-DEL-208	chr1	36555001	36580000	0.234378	0.399794	0.147941	0	0	0	0	0.342974	0	0.329714	0	0	0.289631	0	0	0	0	0	0	0	0	0.436606	0	0	0	0	0	20	0.596695	0.596695
chr1	36571788	36571995	chr1-36571788-DEL-208	chr1	36565001	36590000	0.234378	0.399794	0.147941	0	0	0	0.365444	0.342974	0	0	0.573703	0	0.289631	0	0	0	0	0	0	0	0.254662	0.436606	0	0	0	0.684076	0.352585	16	0.312319	0.596695
chr1	42166821	42167141	chr1-42166821-DEL-321	chr1	42160001	42185000	0.338061	1.05349	0	1.08103	1.09318	1.4264	1.17702	0.803138	1.26145	1.14494	0.916211	1.05898	0.83408	1.32803	0.861406	1.60957	1.47758	1.19132	0	1.14193	1.19432	1.69822	0	1.1527	1.39638	0.963681	1.13308	3	1	1
chr1	47076550	47076860	chr1-47076550-DEL-311	chr1	47075001	47100000	0.36687	0	0	0.937748	0.330475	0.813554	0	0.674057	0	0.507854	0.340587	0.591902	1.06613	0.591405	0.667565	0.866273	0.150621	0	0.737223	0.153525	0	1.89807	0.741	0.708441	0.682954	0.890856	0.485086	6	0.850137	0.850137
chr1	47708465	47708548	chr1-47708465-DEL-84	chr1	47700001	47725000	0.208088	0.878909	0	0	0.475448	0	0.427949	0.627216	0	0	0	0	0.680753	0	0	0	0.84796	0	0.4796	0.464625	0	0.686276	0.493124	0.742987	0.530318	0	0	14	0.659889	0.659889
chr1	54821879	54822196	chr1-54821879-DEL-318	chr1	54805001	54830000	0.350934	0.886869	0.674259	0	0.845377	0.712658	0.941266	0	0.906251	0.67939	0.963471	0.651819	0.811416	0.815068	0	0.727011	1.0099	0.978257	0.897995	0.685263	0.612262	0.984746	0.609949	1.03387	0.590546	0	0.924344	4	0.878479	0.878479
chr1	58729268	58729327	chr1-58729268-DEL-60	chr1	58720001	58745000	0.189925	0	0.607725	0.60497	0	0.497876	0.770322	0	0.548866	0	0	0.526488	0	0	0	0	0	0	0.668926	0	0	0	0	1.07209	0	0	0	18	0.672262	0.672262
chr1	61647742	61653848	chr1-61647742-DEL-6107	chr1	61630001	61655000	0.295133	0.507257	0.587478	0.469523	0	0	0.434016	0.55357	0.571933	0.557916	0	0	0.488827	0.589221	0.633657	0.676272	0.438844	0.876478	0.390847	0	0.456454	0.488442	0.418773	0	0	0.38683	0.468404	7	0.899787	0.899787
chr1	63444579	63444634	chr1-63444579-DEL-56	chr1	63440001	63465000	0.278673	0.353637	0.672761	0.746931	0.337029	0.603872	0.473851	0	0.522531	0.659526	0.436429	0.22398	0.694462	0.627019	0.244384	0.231012	0.55786	0.786376	0.578222	0.93351	0.211124	0.561899	0	0.28323	0.688844	0.484496	0.568719	2	0.0469879	0.0469879
chr1	65216548	65216911	chr1-65216548-DEL-364	chr1	65215001	65240000	0.545473	1.22022	0.960534	0.410759	0	0.867535	0.87844	0.9226	0.912534	0.886575	0.741441	0.807954	0.937655	0.798509	0.531058	0.771675	1.01292	1.33221	1.04919	1.22655	1.0085	1.12594	1.12595	0.724062	1.27216	0.650757	1.08546	1	0.373883	0.373883
chr1	66735522	66735853	chr1-66735522-DEL-332	chr1	66720001	66745000	0.42561	0.780006	1.04123	0.937897	1.12015	1.02593	0.745361	1.03038	0.835867	1.04404	0.717744	1.16742	0.848215	0.929743	0	0.76956	1.18226	0.82899	1.05486	0.908279	0.727591	0	1.23688	0	1.09222	0.734786	0.754359	3	0.409486	0.409486
chr1	72300641	72346156	chr1-72300641-DEL-45516	chr1	72345001	72370000	1.00845	0	2.48523	0.750408	0.257095	0	0.932288	0.630855	0	0.86436	0.693777	0	0	0	0	0	0	0	0	0.680818	0.422025	0	0.962486	0	0	0.367072	0.819379	14	0.497391	0.497391
chr1	83287807	83287913	chr1-83287807-DEL-107	chr1	83265001	83290000	0.194344	0.584911	0	0	0	0	1.01731	0	0	0	0	0	0.295067	0.900911	0	0	0	1.70217	0	0.752102	0	0	0	0	1.16874	0.927936	0	18	0.856355	0.856355
chr1	86842282	86842447	chr1-86842282-DEL-166	chr1	86825001	86850000	0.385535	0.600093	0.795026	0.98174	1.02538	1.0818	0.990109	0.990866	0.799381	1.06134	0.524485	0.840963	0.994832	1.0027	1.34017	0	0.513991	0.897696	0.979437	1.15114	0.795278	1.25298	0.653786	0.713868	0.596831	1.20593	0.922423	1	0.144784	0.144784
chr1	88993894	88993957	chr1-88993894-DEL-64	chr1	88970001	88995000	0.66185	0	1.14173	1.3312	1.07873	0.900695	1.04627	0.951027	0.833395	1.2994	0.899972	1.20645	1.09833	0	1.03218	1.12174	1.03329	1.02596	1.18851	1.04771	0.644745	1.05798	0.946436	0	0	0.666587	0.484588	4	0.801034	0.801034
chr1	91168653	91168704	chr1-91168653-DEL-52	chr1	91160001	91185000	0.383771	0.681184	0.87636	0.557912	1.04556	0.845707	0.832045	0.908498	0.654875	0.663297	0.175734	0.642751	0.585215	0.70791	0.799057	0.749026	0.965861	1.00141	0.454495	0.786059	0.820826	1.23091	0.956301	0.867048	0.982088	0.714033	1.03016	0	0.672262	0.672262
chr1	91169336	91169391	chr1-91169336-DEL-56	chr1	91160001	91185000	0.383771	0.681184	0.87636	0.557912	1.04556	0.845707	0.832045	0.908498	0.654875	0.663297	0.175734	0.642751	0.585215	0.70791	0.799057	0.749026	0.965861	1.00141	0.454495	0.786059	0.820826	1.23091	0.956301	0.867048	0.982088	0.714033	1.03016	0	0.224232	0.224232
chr1	92826424	92827237	chr1-92826424-DEL-814	chr1	92825001	92850000	1.13484	2.10543	1.88993	2.25989	2.2151	2.3617	1.98485	2.09021	2.50477	2.36696	2.32549	2.06569	2.19697	2.6101	1.55932	2.83336	2.18201	2.19192	1.956	2.19787	2.16235	2.47999	2.23037	2.78713	2.16917	2.02538	2.35787	0	0.560362	0.560362
chr1	94477682	94477763	chr1-94477682-DEL-82	chr1	94470001	94495000	0.364824	0	0	0	0.828455	0.754543	0.0734523	0	0.775825	0	0	0.58146	0.479732	0.876731	0	0.692535	0.792368	0.637332	0	0.542924	0.54131	0.393789	0	0	0.531859	1.06733	0.974801	10	0.613969	0.613969
chr1	95224955	95225273	chr1-95224955-DEL-319	chr1	95225001	95250000	0.337046	0	0	1.25954	0	0	0.711351	0	0	0.71366	0	0	0.824648	0.605879	0	0	0.806576	0	0.509202	0	0.784968	0	0	0	0.754027	0.845398	1.22952	15	0.344615	0.344615
chr1	97130752	97130845	chr1-97130752-DEL-94	chr1	97120001	97145000	0.197095	0.309874	0	0.28592	0.568072	0.44262	0.236768	0	0	0	0	0	0	0.589283	0.915806	0	0.271214	0.753414	0.355176	0.367173	0.373767	0	0.207549	0.518818	0.394417	0.204628	0.295793	9	1	1
chr1	101253203	101253276	chr1-101253203-DEL-74	chr1	101230001	101255000	0.494241	0.82123	0	0.872772	0	0	1.48521	0	0.651512	0	0	0	0	0	0	0	0	0	0	0	0	0.672903	0	0	0	0	0.604363	20	0.697882	0.697882
chr1	108190704	108193180	chr1-108190704-DEL-2477	chr1	108190001	108215000	2.43446	0	0	0	0	0	0	0	0	0	0	0	0	0.210044	0	0	0	0	0	0	0	0.329097	0	0	0	0	0	24	1	1
chr1	108193198	108194629	chr1-108193198-DEL-1432	chr1	108190001	108215000	2.43446	0	0	0	0	0	0	0	0	0	0	0	0	0.210044	0	0	0	0	0	0	0	0.329097	0	0	0	0	0	24	1	1
chr1	109030610	109032558	chr1-109030610-DEL-1949	chr1	109025001	109050000	0.398751	0.630355	0.738553	0.130495	0	0	0	0.307155	0.551991	0	0	0.498475	0	0.508091	0	0.462754	0	0.491167	0.452541	0.269668	0	0.473563	0.230839	0.416741	0.568158	0.289518	0.55368	9	0.196088	0.196088
chr1	109644542	109648773	chr1-109644542-DEL-4232	chr1	109625001	109650000	0.779929	1.96714	1.35029	1.34483	1.33263	1.64808	1.30842	1.78745	1.27996	2.14598	4.25482	1.52011	2.57936	1.91986	0	1.96302	0	2.45018	1.50845	4.1429	1.2334	2.04208	1.84365	1.46308	2.0892	1.61918	1.71824	2	0.130167	0.130167
chr1	113068701	113071155	chr1-113068701-DEL-2455	chr1	113055001	113080000	0.559702	0.851627	0.895174	0.575639	0.751293	1.07676	0.951317	1.13483	0.867572	0	0.757255	0.841346	1.1157	1.08945	0	0.595542	0.975639	1.07289	1.05241	0.474872	0.798146	0.952875	0.603362	0.529901	0.575941	0.546769	0.801585	2	0.571611	0.571611
chr1	113070090	113070139	chr1-113070090-DEL-50	chr1	113055001	113080000	0.559702	0.851627	0.895174	0.575639	0.751293	1.07676	0.951317	1.13483	0.867572	0	0.757255	0.841346	1.1157	1.08945	0	0.595542	0.975639	1.07289	1.05241	0.474872	0.798146	0.952875	0.603362	0.529901	0.575941	0.546769	0.801585	2	0.402547	0.402547
chr1	113344833	113345864	chr1-113344833-DEL-1032	chr1	113340001	113365000	0.198369	0.0877126	0.419021	0.561922	0.193687	0	0.435684	0.418721	0.288381	0.357621	0	0.24519	0	0.424462	0.878578	0	0.445292	0	0	0	0	0.506396	0.572405	0	0	0.472977	0.165853	10	0.240923	0.240923
chr1	113344833	113345864	chr1-113344833-DEL-1032	chr1	113345001	113370000	0.198369	0.0877126	0.419021	0.561922	0.193687	0	0.435684	0.418721	0.288381	0.357621	0	0.24519	0	0.424462	0.878578	0	0.445292	0	0	0	0	0.506396	0.572405	0	0	0.472977	0.165853	10	0.240923	0.240923
chr1	116369411	116369491	chr1-116369411-DEL-81	chr1	116345001	116370000	0.510133	1.26071	0.827971	0.957312	1.03011	1.11847	1.02234	1.14217	0.98249	0.911889	1.00213	0.866717	1.1187	0.76051	0.796485	1.27454	1.15964	0.995005	0.980452	0.955445	0.625873	0.869184	0.795943	1.18869	0.737713	0.706578	1.06151	0	0.957876	0.957876
chr1	119016149	119016467	chr1-119016149-DEL-319	chr1	119005001	119030000	0.500659	1.19405	0	2.1424	0.96076	0.928107	1.0348	1.75511	1.15752	1.46858	0.892468	1.21241	1.22253	1.97897	1.68719	0.923411	1.02416	1.25965	0.781431	1.39054	1.44695	1.40122	1.13047	2.26878	1.01987	1.38731	1.5304	1	0.899787	0.899787
chr1	150367356	150367413	chr1-150367356-DEL-58	chr1	150350001	150375000	0.546124	0	0.553243	0.542904	0.846124	0	0.567971	0	0	0.813402	0	0.677104	0.41228	0	0.836635	0	0	0	0.538652	0	0.717175	0.885955	0	0	0	0	0	15	0.511438	0.511438
chr1	151600486	151600787	chr1-151600486-DEL-302	chr1	151585001	151610000	0.464774	0.921081	0.517002	0.551706	1.11037	0.643286	0.789389	0.998721	0.465777	0.796931	0.932658	1.16925	0.642753	0.764083	0.768536	0.955271	1.06939	0.670784	0.4263	0.785106	0.78696	1.02075	1.27614	0.753202	1.078	0.786634	1.06196	0	0.832626	0.832626
chr1	151600788	151600837	chr1-151600788-DEL-50	chr1	151585001	151610000	0.464774	0.921081	0.517002	0.551706	1.11037	0.643286	0.789389	0.998721	0.465777	0.796931	0.932658	1.16925	0.642753	0.764083	0.768536	0.955271	1.06939	0.670784	0.4263	0.785106	0.78696	1.02075	1.27614	0.753202	1.078	0.786634	1.06196	0	0.305054	0.305054
chr1	155188651	155189392	chr1-155188651-DEL-742	chr1	155165001	155190000	0.853869	1.70518	1.39748	1.31432	2.21414	1.67847	1.27132	1.16382	1.81275	2.07275	1.48342	1.33472	2.14073	1.40911	1.56725	1.99597	1.63467	1.64994	1.19327	1.47982	1.27726	1.27769	1.99148	1.5614	1.50731	1.29148	1.41324	0	0.821365	0.821365
chr1	155188854	155189218	chr1-155188854-DEL-365	chr1	155165001	155190000	0.853869	1.70518	1.39748	1.31432	2.21414	1.67847	1.27132	1.16382	1.81275	2.07275	1.48342	1.33472	2.14073	1.40911	1.56725	1.99597	1.63467	1.64994	1.19327	1.47982	1.27726	1.27769	1.99148	1.5614	1.50731	1.29148	1.41324	0	0.769231	0.769231
chr1	157570872	157571086	chr1-157570872-DEL-215	chr1	157565001	157590000	0.520423	0	0.499416	0.276237	0.577167	0.693593	0.711552	0.546842	0.725438	0.746916	0.657682	0.546003	0	0.685615	0.692521	0	0.422161	0.766591	0.528292	0.963621	0.534252	0	0.280555	0	0.559154	0.521088	0.641857	5	0.742446	0.742446
chr1	160984567	160984684	chr1-160984567-DEL-118	chr1	160975001	161000000	0.461552	1.62726	1.40111	1.47869	1.33725	1.56987	1.46302	1.27621	0.811868	1.67209	1.19398	1.35965	1.06401	1.59913	1.32863	1.49965	1.5249	1.11689	1.03952	1.41526	0.879402	1.32715	1.00756	1.4381	1.70221	1.50058	1.59046	0	0.169206	0.169206
chr1	160985051	160985361	chr1-160985051-DEL-311	chr1	160975001	161000000	0.461552	1.62726	1.40111	1.47869	1.33725	1.56987	1.46302	1.27621	0.811868	1.67209	1.19398	1.35965	1.06401	1.59913	1.32863	1.49965	1.5249	1.11689	1.03952	1.41526	0.879402	1.32715	1.00756	1.4381	1.70221	1.50058	1.59046	0	0.184615	0.184615
chr1	161645636	161645691	chr1-161645636-DEL-56	chr1	161640001	161665000	1.36658	1.93565	2.21833	2.42797	1.13649	1.94207	2.43051	2.2047	1.65294	0	2.00755	2.84476	1.72012	1.14901	0	0	0.933355	1.62104	0	2.91416	1.07274	0	1.94356	0	2.4224	1.46426	2.20373	6	0.45703	0.45703
chr1	162486956	162487266	chr1-162486956-DEL-311	chr1	162480001	162505000	0.511844	0.92118	1.04891	0.713441	1.03661	1.07291	0.940843	1.009	0.720289	0.720069	1.11168	0.739002	0.397762	0.362988	0	1.42355	1.39828	1.28056	0.975487	0.668088	0.911932	0.707138	0.936132	1.57278	0.697981	0.760791	1.29202	1	0.63402	0.63402
chr1	165582945	165583142	chr1-165582945-DEL-198	chr1	165580001	165605000	1.05206	2.06793	2.40881	2.2819	2.27348	2.6459	2.3106	2.40225	3.02528	2.82556	1.89315	2.45757	1.8652	2.25547	1.85951	1.98431	2.33767	2.61068	2.30495	2.58969	2.26665	2.6099	2.01643	2.12283	2.30856	2.03502	2.52062	0	0.153846	0.153846
chr1	169355006	169355090	chr1-169355006-DEL-85	chr1	169350001	169375000	0.37228	1.04692	1.29332	1.39122	1.19071	1.35609	1.28738	1.28379	1.11559	1.18483	0.871484	1.3427	0.845609	1.35966	0.829051	1.15478	1.24506	1.18573	1.41774	1.28584	0.967096	1.43717	1.04676	1.50355	1.3234	0.943472	1.27284	0	0.910143	0.910143
chr1	171220984	171221098	chr1-171220984-DEL-115	chr1	171210001	171235000	0.51886	0.833879	0	0.802174	1.09242	0.896957	0	0.886591	0.680301	0.928352	0.893685	0.798248	0	0.861276	0.787785	0.841595	0.67531	0.980202	1.00155	0.857908	0.850058	1.06779	1.26299	0.889944	0.999585	0.891548	1.09278	3	0.751153	0.751153
chr1	178526151	178526503	chr1-178526151-DEL-353	chr1	178520001	178545000	1.07304	2.46914	2.00665	2.22872	2.03416	2.4634	1.87937	2.07481	2.34398	2.11776	2.19331	2.24812	2.47161	2.26313	1.82617	2.38312	2.47127	1.95852	2.20317	2.49767	2.6402	1.90293	2.32601	1.85246	1.84832	2.23757	2.18948	0	0.791615	0.791615
chr1	182447011	182447078	chr1-182447011-DEL-68	chr1	182430001	182455000	0.244144	0	1.05229	0	1.42026	0	0	0	0	0	1.13593	0	0	0	0	0	0	0	0.952863	0	0	1.38843	1.25249	0	1.32262	0	0	19	0.218529	0.218529
chr1	184799723	184800044	chr1-184799723-DEL-322	chr1	184790001	184815000	0.637282	0.946349	1.01693	0.650216	1.43436	0.843848	0.858951	0	0.854935	0.813234	0.986705	0.86416	1.19305	1.01931	0.956402	1.05647	0.715007	0	1.20619	0.903432	0.626238	1.09493	1.15442	1.41783	1.20967	0.84133	0.998318	2	0.26808	0.26808
chr1	185040670	185042601	chr1-185040670-DEL-1932	chr1	185030001	185055000	0.262507	0	0	0	0	0	0.238095	0	0	0	0.369107	0	0	0	0	0	0	0	0.562433	0	0	0	0	0	0	0	1.49481	22	0.494193	0.494193
chr1	196757583	196842265	chr1-196757583-DEL-84683	chr1	196825001	196850000	0.31901	0.658103	0	0	0	0.750886	0.830627	0.757327	0	0.28713	0	0	0	1.45042	1.66623	0	0	0	0	0	0.759596	1.22285	0	0.576132	0	0	0.537932	15	0.0954269	0.0954269
chr1	196757583	196842265	chr1-196757583-DEL-84683	chr1	196735001	196760000	0.195513	0	0	0	0.308195	0.819333	0	0	0	0	0	0	0	0	0	0	0	1.15685	0	0	0.239488	0.988505	0	1.44055	0	0.629889	0	19	0.0384246	0.0768493
chr1	197924894	197925176	chr1-197924894-DEL-283	chr1	197920001	197945000	0.245936	0.838953	0.686682	0.538632	0.715039	0.560414	0.71175	0.519453	0.525377	0	1.03186	0.688408	0.483376	0.789448	0.354258	0.779573	0.79152	0.839282	0.750713	0.489698	0.994239	1.13423	0.727175	0.578692	0.505908	0.619887	1.04761	1	0.275385	0.275385
chr1	200816818	200816873	chr1-200816818-DEL-56	chr1	200810001	200835000	0.30279	0.528733	0.755379	0	0.672226	0.682074	0.423332	0.852071	0.63985	0.655863	0.432772	0.47595	0.582516	0.788287	0.670778	0	0.397557	0	0.653501	0.841045	0.543352	0.671444	0.797767	0.597613	0	0	0.388532	5	0.168978	0.253467
chr1	200816818	200816873	chr1-200816818-DEL-56	chr1	200815001	200840000	0.30279	0.528733	0.755379	0	0.672226	0.682074	0.423332	0.852071	0.63985	0.655863	0.432772	0.47595	0.582516	0.788287	0.670778	0	0.397557	0	0.653501	0.841045	0.543352	0.671444	0.797767	0.597613	0	0	0.388532	5	0.168978	0.253467
chr1	200816818	200816873	chr1-200816818-DEL-56	chr1	200795001	200820000	0.30279	0.528733	0	0.463576	0.672226	0.682074	0	0.852071	0.63985	0.655863	0	0.47595	0.582516	0.788287	0	0.697121	0.397557	0.473651	0.653501	0.841045	0	0	0.797767	0.597613	0.682468	0.544499	0.388532	6	0.801042	0.801042
chr1	200817210	200817261	chr1-200817210-DEL-52	chr1	200810001	200835000	0.30279	0.528733	0.755379	0	0.672226	0.682074	0.423332	0.852071	0.63985	0.655863	0.432772	0.47595	0.582516	0.788287	0.670778	0	0.397557	0	0.653501	0.841045	0.543352	0.671444	0.797767	0.597613	0	0	0.388532	5	0.609783	0.914674
chr1	200817210	200817261	chr1-200817210-DEL-52	chr1	200815001	200840000	0.30279	0.528733	0.755379	0	0.672226	0.682074	0.423332	0.852071	0.63985	0.655863	0.432772	0.47595	0.582516	0.788287	0.670778	0	0.397557	0	0.653501	0.841045	0.543352	0.671444	0.797767	0.597613	0	0	0.388532	5	0.609783	0.914674
chr1	200817210	200817261	chr1-200817210-DEL-52	chr1	200795001	200820000	0.30279	0.528733	0	0.463576	0.672226	0.682074	0	0.852071	0.63985	0.655863	0	0.47595	0.582516	0.788287	0	0.697121	0.397557	0.473651	0.653501	0.841045	0	0	0.797767	0.597613	0.682468	0.544499	0.388532	6	1	1
chr1	201690166	201690382	chr1-201690166-DEL-217	chr1	201690001	201715000	0.594958	1.35585	1.72498	1.06468	1.11801	1.71837	1.24296	1.37714	1.25129	1.28353	1.10025	1.28296	1.20949	1.32992	1.74651	1.16577	1.03099	1.56922	0.995228	1.69579	0.913798	1.6254	1.14172	1.32316	1.12041	1.33487	1.76643	0	0.976354	0.976354
chr1	202451123	202452610	chr1-202451123-DEL-1488	chr1	202440001	202465000	0.471721	1.51325	1.05801	1.74364	1.40182	1.63361	1.33621	1.52063	1.39043	0	1.3396	1.09557	1.46012	0.942883	0	0.547604	1.29593	1.30107	1.06855	1.23569	1.46187	1.89501	1.39592	1.55929	1.39651	0.903324	0.856293	2	0.0828611	0.0828611
chr1	202458066	202458348	chr1-202458066-DEL-283	chr1	202440001	202465000	0.471721	1.51325	1.05801	1.74364	1.40182	1.63361	1.33621	1.52063	1.39043	0	1.3396	1.09557	1.46012	0.942883	0	0.547604	1.29593	1.30107	1.06855	1.23569	1.46187	1.89501	1.39592	1.55929	1.39651	0.903324	0.856293	2	0.75786	0.75786
chr1	203715149	203717071	chr1-203715149-DEL-1923	chr1	203695001	203720000	0.602974	1.04906	1.62275	1.1233	1.41158	1.60358	1.01726	0.42418	1.00747	0.941479	1.74202	1.26432	1.35244	0.852799	0.99103	1.20329	1.05078	1.20854	1.00701	1.32172	1.02349	1.69559	1.48764	1.1509	1.26463	1.07441	1.42199	0	0.744473	0.744473
chr1	205906503	205906564	chr1-205906503-DEL-62	chr1	205900001	205925000	0.422718	0.809552	0.688162	0.361173	0	0.622978	0.548669	0.690322	0.843219	0.307365	0.737972	0	0.516835	0.52053	0	0	0.741116	0.617359	0.603853	0.765434	0.831608	0.810221	0.775949	0.794209	0.888199	0.814105	0.524051	4	0.56045	0.56045
chr1	205981701	205981840	chr1-205981701-DEL-140	chr1	205970001	205995000	0.813483	1.39581	1.54923	1.31871	1.74196	1.45586	1.24223	1.29916	1.59273	1.70449	1.63777	1.55865	1.18591	1.43402	1.68014	1.98883	1.88192	1.37806	1.51239	1.41893	1.32695	1.79125	1.88751	1.67028	1.53578	1.6109	1.64901	0	0.915864	0.915864
chr1	207526605	207545159	chr1-207526605-DEL-18555	chr1	207520001	207545000	0.741163	0	0	0	0	0	0	0	1.59894	0	0	3.05614	0	0	0	0	0	0	0	0	0	0	0	0	2.49852	0	0	23	0.82009	0.82009
chr1	210121959	210122277	chr1-210121959-DEL-319	chr1	210120001	210145000	0.205911	0.492418	0.570414	0.35124	0	0.701325	0.220334	0	0	0.357124	0.50619	0	0.476757	0	0.417296	0	0	0	0.358731	0.397731	0	0	0	0.708589	0.324214	0.703181	0	12	0.230769	0.230769
chr1	212297794	212299274	chr1-212297794-DEL-1481	chr1	212275001	212300000	0.677223	1.44446	0.970003	0.858616	1.02731	1.34177	1.1723	1.12329	0.695474	0.918511	0.738887	0.925846	0.921169	0.954721	1.45151	1.40592	1.40195	1.23832	1.00321	0.890001	1.21913	1.27279	0.912166	1.1859	1.08036	1.13904	1.19237	0	0.607358	0.607358
chr1	212468679	212468763	chr1-212468679-DEL-85	chr1	212455001	212480000	0.88197	1.63494	1.63665	2.13577	1.91979	1.89828	1.48992	1.4567	1.44316	1.96459	1.61674	1.80744	1.82731	1.77803	1.09034	1.8269	2.00586	1.79227	1.75829	1.78205	1.8594	2.17385	1.66694	1.84551	2.14753	1.76297	1.59874	0	0.495435	0.495435
chr1	212865885	212866053	chr1-212865885-DEL-169	chr1	212860001	212885000	0.245904	0	0	0.299438	0.450464	0.561034	0	0.718408	0.735275	0	0.341373	0.385256	0.517038	0.298513	0.415276	0	0.402738	0	0.600044	0.341573	0.602457	0.0684176	0.248194	0.494447	0	0.275994	0.389294	7	0.878479	0.878479
chr1	214596761	214597094	chr1-214596761-DEL-334	chr1	214585001	214610000	0.357309	0.580855	0.855607	0.802283	0.568295	0	0.663267	0.672692	0.476963	0	0.561117	0	0	0	0	0.577863	0.629587	0.548081	0.542203	0	0.835211	1.20142	0	0	0.545574	0	0	11	0.724146	0.724146
chr1	214679646	214679711	chr1-214679646-DEL-66	chr1	214660001	214685000	0.3594	0.929314	0.79034	1.06511	0.553524	1.14618	0.694319	0.881749	0.926213	1.02137	0.713866	0.885164	0.999057	0	0.555918	0.527397	0.591623	1.02343	0.986477	1.15663	0	0.774954	0.661288	0.890196	1.10845	0.773169	0.86739	2	0.00415804	0.00415804
chr1	220112113	220112432	chr1-220112113-DEL-320	chr1	220095001	220120000	0.290024	0	0.414097	0.395267	0.530857	0	0.415375	0.220821	0	0.267032	0.784038	0.423356	0.611907	0.504102	0	0.551924	0.604643	0.565661	0.428524	0.623458	0.674253	0	0.500727	0.593347	0.396508	0.318457	0.93034	5	0.0101686	0.0101686
chr1	220817517	220817580	chr1-220817517-DEL-64	chr1	220795001	220820000	0.627725	1.18812	0.606837	0.782118	1.14703	0.891696	1.43754	1.22372	1.20819	0.619533	0.724418	0.656641	1.51643	1.24786	1.34212	0.653563	2.08612	1.59096	1.04742	0.982312	0.91093	1.91022	1.12346	1.32645	1.53422	1.02293	0.788579	0	0.764841	0.764841
chr1	226622680	226622774	chr1-226622680-DEL-95	chr1	226610001	226635000	1.08109	1.88206	2.29098	1.98544	2.21889	2.16798	1.7896	1.93932	2.19439	2.17304	1.83282	2.3839	2.0562	2.18123	1.52302	2.14902	2.53819	2.13742	2.16416	2.19524	1.78829	2.89857	1.68314	1.94329	2.28708	1.99142	2.05732	0	0.483794	0.483794
chr1	227965382	227965496	chr1-227965382-DEL-115	chr1	227960001	227985000	0.495761	0.848754	0.603404	0.680948	0	1.0672	0.732953	1.26315	1.2207	0.964369	1.09467	1.00364	1.00322	1.11201	0.808199	1.24744	1.28837	1.5376	0.645707	0.687089	0.984979	1.33988	0.620958	1.15182	0.642888	0.989524	1.23175	1	0.181451	0.181451
chr1	229237642	229238015	chr1-229237642-DEL-374	chr1	229235001	229260000	0.835858	1.52747	1.72999	2.06366	1.60395	2.11322	1.86454	1.74326	1.17819	1.61619	1.85283	1.87798	1.89074	2.08015	1.68435	2.08263	1.6039	1.58641	1.61703	2.04467	1.7518	1.99558	1.58509	2.09879	1.96612	1.77603	2.4523	0	0.217081	0.217081
chr1	231733709	231733762	chr1-231733709-DEL-54	chr1	231725001	231750000	0.307358	0.530474	0	0	0	0	0	0.497656	0	0.279165	0	0	0.663811	0.533672	0.159565	0	0.419568	0.502667	0	0.472728	0.371249	0	0.374372	0	0.226398	0	0.608601	13	0.683217	0.683217
chr1	232639784	232640097	chr1-232639784-DEL-314	chr1	232625001	232650000	0.425592	1.0583	0.751291	1.89307	0.61909	1.27646	1.42066	0.977451	1.29656	1.04525	0.695107	0.514394	0.94398	0.761514	1.06005	0.866216	1.02823	0.838214	0.70636	1.48434	1.09394	0.60009	0.588797	1.37649	0.710213	0.888293	0	1	0.462387	0.462387
chr1	233594418	233594488	chr1-233594418-DEL-71	chr1	233585001	233610000	0.388196	0.690657	0.908208	0.416854	0.469988	0.54861	0.72383	0.866839	0.226743	0.631389	0.245951	0	0.71439	0.715535	0.369978	0.331684	0	0.487946	0	0.402715	0.528596	0.503331	0	1.01451	0	0.683643	0.597904	5	0.646084	0.646084
chr1	234775710	234776440	chr1-234775710-DEL-731	chr1	234760001	234785000	0.452937	0	0	0	1.23236	0.285575	1.02191	0.917689	1.01015	0.349484	0.541726	1.10788	1.26578	1.5133	1.75212	1.37336	0	0	1.029	0	1.5205	1.04923	1.0758	1.13301	0.646444	0	0	8	0.683178	0.683178
chr1	235091682	235092820	chr1-235091682-DEL-1139	chr1	235080001	235105000	1.64381	2.76595	2.70851	2.81042	2.78483	2.91736	2.38962	2.7747	2.52887	2.89328	2.5238	2.54072	2.56985	2.0441	2.24159	2.36013	2.69437	2.71908	2.50965	2.4184	2.5661	2.87104	2.321	2.57926	2.51162	2.71295	2.77286	0	0.0941988	0.0941988
chr1	236755695	236756331	chr1-236755695-DEL-637	chr1	236745001	236770000	0.330522	0.666905	0.658156	0.69347	0.60941	0.852805	0.791373	0	0	0.613823	0.594079	0.921104	0.742265	0.580359	0.805186	0	0.726432	0.630711	0.614086	0.675425	0.685729	0.682767	0.798865	0.326975	0.817358	0.79041	0.764991	3	0.38969	0.38969
chr1	236755708	236755952	chr1-236755708-DEL-245	chr1	236745001	236770000	0.330522	0.666905	0.658156	0.69347	0.60941	0.852805	0.791373	0	0	0.613823	0.594079	0.921104	0.742265	0.580359	0.805186	0	0.726432	0.630711	0.614086	0.675425	0.685729	0.682767	0.798865	0.326975	0.817358	0.79041	0.764991	3	0.791615	0.791615
chr1	236756381	236756772	chr1-236756381-DEL-392	chr1	236745001	236770000	0.330522	0.666905	0.658156	0.69347	0.60941	0.852805	0.791373	0	0	0.613823	0.594079	0.921104	0.742265	0.580359	0.805186	0	0.726432	0.630711	0.614086	0.675425	0.685729	0.682767	0.798865	0.326975	0.817358	0.79041	0.764991	3	0.0510217	0.0510217
chr1	236756724	236756870	chr1-236756724-DEL-147	chr1	236745001	236770000	0.330522	0.666905	0.658156	0.69347	0.60941	0.852805	0.791373	0	0	0.613823	0.594079	0.921104	0.742265	0.580359	0.805186	0	0.726432	0.630711	0.614086	0.675425	0.685729	0.682767	0.798865	0.326975	0.817358	0.79041	0.764991	3	0.38969	0.38969
chr1	236757061	236757158	chr1-236757061-DEL-98	chr1	236745001	236770000	0.330522	0.666905	0.658156	0.69347	0.60941	0.852805	0.791373	0	0	0.613823	0.594079	0.921104	0.742265	0.580359	0.805186	0	0.726432	0.630711	0.614086	0.675425	0.685729	0.682767	0.798865	0.326975	0.817358	0.79041	0.764991	3	0.200535	0.200535
chr1	237578685	237578748	chr1-237578685-DEL-64	chr1	237565001	237590000	0.332578	0.640394	0.76324	0.672021	0.618893	0.691623	0.75852	0.523243	0.808312	0.491644	0	0.399927	0.775149	0.518206	0.653287	0.503259	0.241871	0.430708	0.727424	0.461921	0.395468	0.528069	0.386495	0.375227	0.729691	0.467069	0.552772	1	0.483794	0.483794
chr1	243338981	243339034	chr1-243338981-DEL-54	chr1	243320001	243345000	1.31162	2.75736	2.17896	2.23064	2.42614	2.74044	2.35933	2.26491	2.36517	2.2882	2.21717	1.95122	2.14573	2.70034	1.98005	2.14416	2.07477	2.39654	2.28276	2.6744	2.19074	2.65481	1.90123	2.54837	2.00469	2.41729	3.07947	0	0.915864	0.915864
chr1	246002323	246002456	chr1-246002323-DEL-134	chr1	246000001	246025000	0.777239	1.6422	1.23939	1.57468	1.86071	1.84925	1.81254	1.28226	1.43216	1.61545	1.5602	1.65289	1.21866	1.62445	1.65695	1.88186	1.3436	1.25243	1.68052	1.84009	1.16236	1.56702	1.64222	1.72466	1.85966	1.31478	1.47586	0	0.260831	0.260831
chr1	246003981	246004077	chr1-246003981-DEL-97	chr1	246000001	246025000	0.777239	1.6422	1.23939	1.57468	1.86071	1.84925	1.81254	1.28226	1.43216	1.61545	1.5602	1.65289	1.21866	1.62445	1.65695	1.88186	1.3436	1.25243	1.68052	1.84009	1.16236	1.56702	1.64222	1.72466	1.85966	1.31478	1.47586	0	1	1
chr1	246478547	246478640	chr1-246478547-DEL-94	chr1	246475001	246500000	0.562557	1.40995	1.22654	1.03461	1.65213	1.46949	1.34708	1.00212	1.39705	0	1.22326	0	1.37508	1.25063	0	1.20293	0	1.21651	1.33919	0	1.39762	1.56989	1.09899	1.66184	1.23679	1.08537	1.28671	5	0.402547	0.402547
chr1	246484180	246484231	chr1-246484180-DEL-52	chr1	246475001	246500000	0.562557	1.40995	1.22654	1.03461	1.65213	1.46949	1.34708	1.00212	1.39705	0	1.22326	0	1.37508	1.25063	0	1.20293	0	1.21651	1.33919	0	1.39762	1.56989	1.09899	1.66184	1.23679	1.08537	1.28671	5	0.613969	0.613969
chr1	246493799	246493863	chr1-246493799-DEL-65	chr1	246475001	246500000	0.562557	1.40995	1.22654	1.03461	1.65213	1.46949	1.34708	1.00212	1.39705	0	1.22326	0	1.37508	1.25063	0	1.20293	0	1.21651	1.33919	0	1.39762	1.56989	1.09899	1.66184	1.23679	1.08537	1.28671	5	0.527029	0.527029
chr1	246783013	246783284	chr1-246783013-DEL-272	chr1	246760001	246785000	0.427359	0.391765	0.819417	0.481369	0.295362	0.594951	0.603507	0.592049	0.32001	0.348177	0.578188	0.394995	0.419508	0.935145	0	0.993421	0.574037	1.01183	0	0.512416	0.669348	1.02686	0.640208	0	0.291655	0.551707	0.600383	3	0.117926	0.117926
chr1	246825860	246825922	chr1-246825860-DEL-63	chr1	246820001	246845000	0.304767	0.410994	0	0	0.560316	0.157565	0.38251	0.0854607	0.321956	0.408752	0.385404	0.415664	0.504984	0.62508	0	0.387424	0.574037	0.461317	0.584686	0.262584	0.747875	0.145332	0	0.9505	0.357368	0.174292	0.600383	4	0.878479	0.878479
chr1	247327763	247327841	chr1-247327763-DEL-79	chr1	247310001	247335000	0.339332	1.0868	0.525479	0	1.20836	0	0	0.449598	0.984435	0.99531	0.673251	0	1.2713	0	0	0.22283	1.52423	1.35493	1.18153	0.343752	0	1.59813	0	0.777768	0	0	0	11	0.163875	0.163875
chr1	247373457	247373651	chr1-247373457-DEL-195	chr1	247355001	247380000	0.438279	0	0.661676	0.716511	1.20836	1.30544	0	0.67524	0	0.99531	0.995396	1.20499	1.2713	0.713083	0.987428	0.73032	0	1.35493	1.18153	0.653931	1.22577	1.59813	0.831255	0	1.064	1.3921	1.01933	5	0.0769231	0.0769231
chr1	248675030	248675935	chr1-248675030-DEL-906	chr1	248675001	248700000	0.832387	1.88606	2.07746	2.15984	0.86243	1.89729	1.05696	1.2811	1.57177	2.41448	1.71309	1.41722	1.76253	1.57665	0.881855	1.15072	1.63596	1.25693	1.32572	1.89357	0	0	1.54188	1.75837	1.69947	1.12357	0	3	0.39464	0.39464
chr10	367894	368125	chr10-367894-DEL-232	chr10	350001	375000	0.220481	0.701631	0	0.704572	0	0.494468	0.415747	0	0.348513	0.27412	0	0.546001	0.731317	0.630058	0.67187	0.857584	0	0	0.519026	0.38001	1.00296	0	0.375377	0.501192	0.392964	0.463257	0.551042	7	0.230769	0.230769
chr10	367894	368125	chr10-367894-DEL-232	chr10	365001	390000	0.220481	0.701631	0	0.704572	0.570245	0.494468	0.415747	0	0.348513	0.27412	0	0.546001	0.731317	0.630058	0.67187	0	0.498826	0	0.519026	0.38001	1.00296	0	0.375377	0	0.392964	0	0.551042	8	0.153846	0.230769
chr10	489816	490012	chr10-489816-DEL-197	chr10	490001	515000	0.243534	0.608147	0.43628	0	0.281767	0.643226	0.608362	0.277073	0.571634	0.888925	0	0.508715	0	0.694675	0	0	0.650739	0.551847	0.508453	0.297623	0.78847	0	0	0	0.44394	0.714193	0.979998	8	0.615385	0.615385
chr10	780112	780251	chr10-780112-DEL-140	chr10	780001	805000	0.451663	0.754855	1.32321	0.95533	1.35746	1.04364	0.981278	0.954504	1.1629	1.5386	1.28625	1.27519	1.23546	1.00469	1.79849	1.21811	1.09577	1.1519	0.818213	1.03038	1.17312	1.50451	1.17562	1.41027	0	1.12643	0.845496	1	0.199983	0.199983
chr10	783810	784053	chr10-783810-DEL-244	chr10	780001	805000	0.451663	0.754855	1.32321	0.95533	1.35746	1.04364	0.981278	0.954504	1.1629	1.5386	1.28625	1.27519	1.23546	1.00469	1.79849	1.21811	1.09577	1.1519	0.818213	1.03038	1.17312	1.50451	1.17562	1.41027	0	1.12643	0.845496	1	0.899475	0.899475
chr10	783834	784504	chr10-783834-DEL-671	chr10	780001	805000	0.451663	0.754855	1.32321	0.95533	1.35746	1.04364	0.981278	0.954504	1.1629	1.5386	1.28625	1.27519	1.23546	1.00469	1.79849	1.21811	1.09577	1.1519	0.818213	1.03038	1.17312	1.50451	1.17562	1.41027	0	1.12643	0.845496	1	0.0941988	0.0941988
chr10	793655	793958	chr10-793655-DEL-304	chr10	780001	805000	0.451663	0.754855	1.32321	0.95533	1.35746	1.04364	0.981278	0.954504	1.1629	1.5386	1.28625	1.27519	1.23546	1.00469	1.79849	1.21811	1.09577	1.1519	0.818213	1.03038	1.17312	1.50451	1.17562	1.41027	0	1.12643	0.845496	1	0.0510217	0.0510217
chr10	1409635	1410079	chr10-1409635-DEL-445	chr10	1405001	1430000	0.36058	0.590599	0.821815	0	0.517959	0.8488	0	1.09648	0.234946	1.22273	0	0	1.02178	0.443835	1.09161	0.878727	0.65491	0.791257	0.529493	0.918248	0.8079	0	0.696451	0	0.718264	0	1.09241	7	0.0076299	0.0076299
chr10	1409912	1409995	chr10-1409912-DEL-84	chr10	1405001	1430000	0.36058	0.590599	0.821815	0	0.517959	0.8488	0	1.09648	0.234946	1.22273	0	0	1.02178	0.443835	1.09161	0.878727	0.65491	0.791257	0.529493	0.918248	0.8079	0	0.696451	0	0.718264	0	1.09241	7	0.218529	0.218529
chr10	1659737	1659857	chr10-1659737-DEL-121	chr10	1640001	1665000	0.193791	0	0	0	0	0.357945	0	0	0	0.446095	0.379007	0	0.193065	0.424176	0	0	0.601785	0	0.514816	0	0	0	0.547835	0.15722	0.127842	0.222271	0.157297	14	0.882274	0.882274
chr10	1750203	1750476	chr10-1750203-DEL-274	chr10	1735001	1760000	0.37602	0.321529	0.67124	0	0.459476	0.498285	0	0.953189	0.70741	0.862126	0.467692	0.851877	0	0.762985	0.846422	0.405715	0	0.815438	1.17833	0.794838	0	0.709215	0.756324	0.454684	0.991918	0.520413	0	6	0.957876	0.957876
chr10	3061361	3061444	chr10-3061361-DEL-84	chr10	3050001	3075000	0.802815	1.76027	1.51136	1.39322	1.67053	1.68558	1.3468	1.72504	1.60972	1.60072	1.55132	1.6033	1.311	1.52225	1.45901	1.60704	1.64642	1.72403	1.5673	1.41062	1.43698	1.62433	1.51097	1.62464	1.29925	1.16117	1.01848	0	0.65868	0.65868
chr10	4117414	4117598	chr10-4117414-DEL-185	chr10	4115001	4140000	0.200012	0	0.289401	0.450015	0.294616	0.392588	0	0	0.563815	0	0	0	0.098659	0.413602	0.31091	0.549319	0	0	0.345099	0.196286	0.241936	0.495391	0	0	0.899756	0.109212	0.267169	10	0.801034	0.801034
chr10	4666329	4668328	chr10-4666329-DEL-2000	chr10	4645001	4670000	0.269401	0	0	0.551984	0.841067	0.648246	0	0.675618	0	0.553609	0	0.133315	0	0.381103	0	0	0.475541	0.507034	0	0.591424	0.508924	1.01437	0.479841	0	0	0	0.693228	12	0.559866	0.559866
chr10	4815476	4815695	chr10-4815476-DEL-220	chr10	4795001	4820000	0.397268	0.821286	0.607849	1.18029	1.25817	1.32685	0.749418	1.09351	0.877823	1.30474	0.901243	1.08201	1.20782	0.964494	0.902567	0.972868	0.886467	1.30617	0.987104	0	0.927551	1.2928	1.25807	1.4561	1.48921	0.805398	1.09344	1	1	1
chr10	4815476	4815585	chr10-4815476-DEL-110	chr10	4795001	4820000	0.397268	0.821286	0.607849	1.18029	1.25817	1.32685	0.749418	1.09351	0.877823	1.30474	0.901243	1.08201	1.20782	0.964494	0.902567	0.972868	0.886467	1.30617	0.987104	0	0.927551	1.2928	1.25807	1.4561	1.48921	0.805398	1.09344	1	0.764841	0.764841
chr10	5616402	5616456	chr10-5616402-DEL-55	chr10	5615001	5640000	0.28953	0.992516	0	0.873571	0.73793	1.14286	0.528916	0.72801	0	0	0.804323	0.892817	0.620999	0.884534	0.726758	0.892025	1.08141	0.755313	0.991686	0.829777	0	1.20202	1.12996	0	0.951225	0.579861	0.808345	5	0.457994	0.457994
chr10	6206744	6206859	chr10-6206744-DEL-116	chr10	6190001	6215000	0.569979	1.00937	1.38742	1.35005	1.09845	1.18194	0.855815	1.36129	1.11308	1.00058	1.21813	1.10395	1.22068	1.12878	1.61833	1.94406	1.40748	1.53938	1.33391	1.19385	1.0433	1.24577	1.37633	0.839808	1.47632	1.25849	0.92904	0	0.395807	0.395807
chr10	6209996	6210951	chr10-6209996-DEL-956	chr10	6190001	6215000	0.569979	1.00937	1.38742	1.35005	1.09845	1.18194	0.855815	1.36129	1.11308	1.00058	1.21813	1.10395	1.22068	1.12878	1.61833	1.94406	1.40748	1.53938	1.33391	1.19385	1.0433	1.24577	1.37633	0.839808	1.47632	1.25849	0.92904	0	0.832626	0.832626
chr10	6210561	6210910	chr10-6210561-DEL-350	chr10	6190001	6215000	0.569979	1.00937	1.38742	1.35005	1.09845	1.18194	0.855815	1.36129	1.11308	1.00058	1.21813	1.10395	1.22068	1.12878	1.61833	1.94406	1.40748	1.53938	1.33391	1.19385	1.0433	1.24577	1.37633	0.839808	1.47632	1.25849	0.92904	0	0.153846	0.153846
chr10	6413683	6413733	chr10-6413683-DEL-51	chr10	6400001	6425000	0.871798	1.693	2.07425	2.5913	1.91617	2.24604	1.50323	1.62471	1.98855	1.66395	1.96763	1.44528	1.16635	1.89824	1.03745	1.58653	1.56357	1.86245	1.38654	1.41051	1.72698	2.05183	1.76871	1.6973	2.16673	1.67893	2.20475	0	0.457994	0.457994
chr10	7737615	7737678	chr10-7737615-DEL-64	chr10	7735001	7760000	0.190904	0.33818	0.467326	0.532768	0.593303	0.619441	0.225944	0.181067	0	0.309029	0.0165498	0.448585	0.528203	0.665801	0	0.428913	0.620072	0.577114	0.591346	0.477829	0.559109	0.508758	0.48758	0	0.525263	0.351573	0.714174	3	0.815935	0.815935
chr10	11284044	11284422	chr10-11284044-DEL-379	chr10	11270001	11295000	0.592432	0	1.17952	1.49265	1.73042	0.903025	1.30692	1.3701	1.25846	0	1.26232	0	1.09901	1.29067	1.49785	1.25849	1.81299	1.21769	1.44324	1.11805	1.39899	1.24277	1.54668	1.86926	1.46373	1.29697	0	4	0.138127	0.138127
chr10	12247086	12247355	chr10-12247086-DEL-270	chr10	12245001	12270000	0.798577	1.17616	1.24129	1.24835	1.11942	1.60525	1.05878	1.09027	1.6896	1.31232	1.3634	1.28353	1.07954	1.59919	1.58274	1.31724	1.30327	0	1.08907	1.42532	0.985973	1.64942	1.43364	1.32107	0	1.36386	1.40184	2	0.699944	0.699944
chr10	18214147	18214660	chr10-18214147-DEL-514	chr10	18210001	18235000	0.242131	0.363184	0.327586	0	0.551545	0.584324	0.352888	0.630733	0.656145	0.330403	0.644056	0.400366	0.524682	0.490257	0.763817	0	0	0.554169	0	0.476748	0.557143	0.775882	0.463141	0	0.465371	0.36477	0	6	0.135315	0.135315
chr10	26710087	26713224	chr10-26710087-DEL-3138	chr10	26710001	26735000	0.506007	0	0	0	0	0	0	0	0	0	0	0	1.36881	0	0	1.54938	1.84872	0	0	0	0	1.84154	0	0	0	0	1.93922	21	1	1
chr10	27106774	27106824	chr10-27106774-DEL-51	chr10	27085001	27110000	0.221066	0.476462	0.402502	0	0	0.28166	0.550343	0.60755	0	0.564276	0.225068	0.232827	0	0.268905	0	0.411873	0.284222	0.281431	0	0.309467	0.305018	0.529768	0.511468	0.553156	0	0.378328	0.370303	7	0.910143	0.910143
chr10	27656250	27656300	chr10-27656250-DEL-51	chr10	27655001	27680000	0.18063	0	0.668566	0	0.385707	0	0	0.359573	0	0.52424	0	0	0.455858	0	0	0.748501	0.548339	0	0.713322	0	0	0	0.691726	0	0	0	0	17	0.815935	0.815935
chr10	30677335	30677468	chr10-30677335-DEL-134	chr10	30655001	30680000	0.469227	1.05762	0.604483	0.595714	0	0	0	0.732162	0.756015	0.853173	0.857058	0.319667	0.416038	0.989282	0.543595	0.678497	0.873846	0.864586	0	0	0.641346	0.723209	0	0.889541	0.781336	0.731565	0.971732	6	0.0553846	0.0553846
chr10	31154422	31155935	chr10-31154422-DEL-1514	chr10	31130001	31155000	0.20529	0	0.456252	0.203184	0	0.377391	0.528809	0	0	0	0	0.23182	0	0.216278	0.52745	0.416817	0.761675	0.629529	0	0.480396	0	0.325347	0.149424	0.565488	0.459747	0.199155	0.149091	9	0.264211	0.264211
chr10	42778753	42779084	chr10-42778753-DEL-332	chr10	42760001	42785000	0.433384	0	0.813415	0.559499	1.36755	0	0.659961	1.34139	1.16006	0.899686	0	0.830643	0.529562	0	0	0	0.956118	0	1.17664	1.25051	0.956427	0	1.17269	0.832407	1.02584	0.561965	0.754099	8	0.514515	0.514515
chr10	44405851	44406158	chr10-44405851-DEL-308	chr10	44385001	44410000	0.313441	0.462136	0.51039	0	0	0	0.483847	0.32519	0	0.386454	0.752993	0.542268	0.400211	0	0	0	0.56535	0.733014	0.736444	0	0.144174	0.565486	0.855108	0.563803	0.668571	0.576609	0.750206	8	0.559866	0.559866
chr10	44866390	44866476	chr10-44866390-DEL-87	chr10	44855001	44880000	0.197331	1.29949	0	0	1.40003	1.32081	1.22082	1.47089	0	0	1.32217	0	1.3238	0	1.00949	0	0	1.5239	0	1.40276	1.03629	0.236359	0	0	0	0	1.45476	13	0.285675	0.285675
chr10	52302229	52302278	chr10-52302229-DEL-50	chr10	52295001	52320000	0.186983	0	0.670367	0.686568	0.276418	0.806152	0	0.46278	0	0.346221	0.307789	0	0.464618	0	0	0.810741	0.348573	0	0.376498	0.518398	0.731113	0	0.7925	0	0	0	0.585316	11	0.151572	0.151572
chr10	52604131	52604212	chr10-52604131-DEL-82	chr10	52590001	52615000	0.4486	0.565032	0	0	0	0.901646	0	0.751258	0.766863	0	0	0	0.556704	0.677684	0.746406	0	0.934069	0	0	0	0.523464	0.829551	0.949514	1.30568	0.688349	0.612455	0.699957	11	0.744615	0.744615
chr10	53023782	53029068	chr10-53023782-DEL-5287	chr10	53025001	53050000	0.191124	0.198281	0.474782	0.198578	0	0.390774	0.422447	0.399119	0	0.763807	0	0	0	0.360337	0	0	0.464635	0.267512	0.218384	0.187682	0	0.879724	0.190277	0.53365	0	0	0.581202	10	0.0249847	0.0249847
chr10	56573362	56576030	chr10-56573362-DEL-2669	chr10	56575001	56600000	0.264056	0.523349	0.829644	0.652688	0.491524	0.517701	0.948651	0.448806	0.654447	0.767806	0.1226	0.372957	0.704388	1.06353	0.61295	0.497348	0.811314	0	0.45806	0.299931	0.592202	0.723619	0.245637	0.764302	0.573028	0.602629	0.355665	1	0.723619	0.723619
chr10	59602202	59605250	chr10-59602202-DEL-3049	chr10	59605001	59630000	0.712933	1.34756	1.79414	0.812789	1.66806	1.55407	1.45438	1.0551	1.2342	1.71819	0.912135	1.7272	1.21361	1.72663	1.2368	1.53508	1.84494	1.52831	0.933008	1.41002	0.941273	1.98946	1.44104	0.974389	1.89084	1.21634	1.43821	0	0.0913043	0.0913043
chr10	69238353	69238675	chr10-69238353-DEL-323	chr10	69220001	69245000	0.841205	1.75611	1.23255	1.60336	1.44047	1.48873	1.04778	1.28313	1.28128	1.77965	1.41936	1.67027	1.25494	1.44536	1.53885	1.49311	1.90773	1.63768	1.09298	1.41658	1.24165	1.68994	1.44662	1.149	1.25291	1.21288	2.11787	0	0.789741	0.789741
chr10	69409866	69409915	chr10-69409866-DEL-50	chr10	69395001	69420000	0.987913	2.27149	2.23237	2.24178	2.05569	2.33855	2.03469	1.81684	1.90607	2.04407	1.81711	2.04936	1.89134	2.40634	2.24817	1.89875	2.11635	2.19228	2.27603	2.17202	1.74927	2.57404	2.13312	2.12926	2.15942	1.61836	2.24198	0	0.75263	0.75263
chr10	70220626	70220717	chr10-70220626-DEL-92	chr10	70210001	70235000	0.586177	0.661267	1.16456	0.766818	0.682263	0.743934	0.833353	0.829392	0.792493	0.665522	0.668667	0.684516	0.867972	0.595579	0	0.802209	0.95282	0.949053	0.679401	0.666404	0.975967	1.05217	0.685951	1.35931	1.02048	0.744164	0.656898	1	0.613408	0.613408
chr10	71296784	71296833	chr10-71296784-DEL-50	chr10	71290001	71315000	0.915409	1.57233	1.74009	2.10548	1.57214	1.50354	1.84153	1.61659	1.23957	0	1.90681	1.81606	1.76379	1.74945	0	1.77201	2.15793	1.68061	1.46499	1.95945	2.34604	2.09386	1.92904	1.92911	2.04019	1.32713	1.31688	2	0.494013	0.494013
chr10	72064899	72065202	chr10-72064899-DEL-304	chr10	72045001	72070000	0.402985	0.988919	1.17742	0.97575	1.33092	1.20141	0.823691	0.51782	0.847895	1.15403	0	1.27291	0.933602	1.03959	0	1.2703	1.30199	1.04081	0.821235	1.34374	1.12427	1.06297	0.934817	1.29261	1.33997	0	0.589832	3	0.108558	0.108558
chr10	73082851	73083073	chr10-73082851-DEL-223	chr10	73060001	73085000	0.484724	0	0	0	0.981298	0.914055	0	0.641942	0.775889	0	0	0.728074	0	0	1.17414	1.3902	1.04967	0	0.608528	0	0.875176	0	0.930786	0	1.16633	1.05951	1.26538	12	0.736605	0.736605
chr10	77376559	77376641	chr10-77376559-DEL-83	chr10	77375001	77400000	0.207478	0.274551	0.400478	0.310438	0.751622	0.372817	0.389088	0	0	0.394137	0.261892	0.292668	0	0.657792	0	0.328521	0.592535	0.614543	0.351189	0.484872	0.627227	0.691945	0.485783	0.337357	0.927945	0.304501	0	5	0.899475	0.899475
chr10	79936081	79936235	chr10-79936081-DEL-155	chr10	79925001	79950000	0.328009	0.751247	0	0	0.747709	1.09325	0	0	0.48802	0	0.905092	0	0	0.538575	1.16838	0.885249	0	0.724639	0.331715	1.02572	0	0	0.751623	0.199658	0.957462	0	0	12	0.88	0.88
chr10	83866462	83866668	chr10-83866462-DEL-207	chr10	83860001	83885000	0.37819	0.578603	0	0	0.687332	0	0	0.331953	0.604971	0	0.443536	0.561169	0.394177	0.646383	0	0.902933	0.631553	1.24526	0.520191	0	0.659441	0	0.964875	0.977827	0.879478	0.410296	0.523817	8	0.384615	0.384615
chr10	84023684	84023992	chr10-84023684-DEL-309	chr10	84010001	84035000	0.261375	0.338269	0.684792	0.463419	0.350905	0.344016	0.38495	0.534711	0.63448	0.459963	0.156815	0.424278	0.416759	0	0.384806	0.2825	0.961652	0.649188	0.280226	0.350077	0.400198	0.503289	0.904681	0	0.926723	0.318564	0.609445	2	1	1
chr10	86906419	86906758	chr10-86906419-DEL-340	chr10	86905001	86930000	0.491517	1.01114	1.04031	1.12532	1.07053	1.26925	1.07482	0	0.876301	1.07402	1.20862	1.12662	1.30116	1.11191	0	1.02283	0	1.0662	1.02945	0.913617	1.03176	1.63024	1.2739	1.3497	1.32485	0.931923	0	4	0.704615	0.704615
chr10	86906419	86906758	chr10-86906419-DEL-340	chr10	86895001	86920000	0.491517	1.01114	1.04031	1.12532	1.07053	1.26925	1.07482	0	0.876301	0	0	1.12662	0	1.11191	0	1.02283	0	1.0662	1.02945	0	0	1.63024	0	1.3497	1.32485	0.931923	0	10	0.593846	0.704615
chr10	88695222	88695346	chr10-88695222-DEL-125	chr10	88675001	88700000	0.304866	0.72617	0.701344	0.567387	0.950532	0.79297	0.534097	0.524236	0.830014	0.513832	0.753046	0.582697	0.917732	0.798255	0	0.862657	0.638137	0.787131	0.893565	0.807711	0.678261	1.00134	0.595557	0.864986	0.465495	0.392206	0.658069	1	0.676923	0.676923
chr10	89788578	89788629	chr10-89788578-DEL-52	chr10	89770001	89795000	0.723419	1.11859	1.25038	1.87348	1.80649	1.46075	1.14305	1.14501	1.83697	1.15899	1.08168	1.15998	1.22898	1.17308	0.782909	1.0587	1.60626	1.25974	1.03731	1.2869	0.908504	1.60908	1.32105	1.682	1.38318	1.38804	1.25579	0	0.721104	0.721104
chr10	97218910	97218963	chr10-97218910-DEL-54	chr10	97210001	97235000	0.601675	1.22632	0	1.23814	1.21327	1.11313	0.949035	1.00168	1.11182	1.16964	1.12226	1.20799	0.826462	1.13861	1.73607	1.19529	0.993335	1.34166	1.30075	1.00375	1.08613	1.55988	1.03033	1.02531	1.21066	1.35379	1.16879	1	0.697882	0.697882
chr10	97348526	97348851	chr10-97348526-DEL-326	chr10	97330001	97355000	0.204632	0	0	0	0	0	0	0.428472	0	0	0	0	0	0	0	0	0	0	0	0	0	0	0	0	0	0	0	25	0.849089	0.849089
chr10	97398053	97398353	chr10-97398053-DEL-301	chr10	97385001	97410000	0.516076	0.943321	0.483411	0.776049	1.06932	0.427041	0.725596	0.308017	0.733524	0.667165	0.816584	0.416053	0.558922	0.6668	1.16875	0	0.270243	0.427277	0.489567	0.51406	0	0.953192	0.885163	0.646407	0.568745	0.46849	1.01928	2	0.979843	0.979843
chr10	97657812	97657869	chr10-97657812-DEL-58	chr10	97650001	97675000	0.588371	1.11644	1.11314	0	1.2911	1.1613	1.28195	0.878587	1.06161	1.32485	1.10299	0	0	1.83602	0.678625	0	0	0	0	0	1.04108	0.954251	1.16799	0	0.922517	0	0.91959	10	0.373883	0.373883
chr10	97659157	97660417	chr10-97659157-DEL-1261	chr10	97650001	97675000	0.588371	1.11644	1.11314	0	1.2911	1.1613	1.28195	0.878587	1.06161	1.32485	1.10299	0	0	1.83602	0.678625	0	0	0	0	0	1.04108	0.954251	1.16799	0	0.922517	0	0.91959	10	1	1
chr10	97900485	97900548	chr10-97900485-DEL-64	chr10	97890001	97915000	0.355869	0.771066	0.631726	0.988995	0.845481	1.47914	0.920962	0	0.901094	0.995658	0.808896	0.746468	1.01575	0	1.15637	1.2671	0.894893	0.814555	1.03521	0.849317	0.781849	1.33502	0.852499	1.4483	0.90125	0.790641	1.45075	2	0.613969	0.613969
chr10	97900510	97900829	chr10-97900510-DEL-320	chr10	97890001	97915000	0.355869	0.771066	0.631726	0.988995	0.845481	1.47914	0.920962	0	0.901094	0.995658	0.808896	0.746468	1.01575	0	1.15637	1.2671	0.894893	0.814555	1.03521	0.849317	0.781849	1.33502	0.852499	1.4483	0.90125	0.790641	1.45075	2	0.486136	0.486136
chr10	97900702	97900765	chr10-97900702-DEL-64	chr10	97890001	97915000	0.355869	0.771066	0.631726	0.988995	0.845481	1.47914	0.920962	0	0.901094	0.995658	0.808896	0.746468	1.01575	0	1.15637	1.2671	0.894893	0.814555	1.03521	0.849317	0.781849	1.33502	0.852499	1.4483	0.90125	0.790641	1.45075	2	0.613969	0.613969
chr10	97900812	97900907	chr10-97900812-DEL-96	chr10	97890001	97915000	0.355869	0.771066	0.631726	0.988995	0.845481	1.47914	0.920962	0	0.901094	0.995658	0.808896	0.746468	1.01575	0	1.15637	1.2671	0.894893	0.814555	1.03521	0.849317	0.781849	1.33502	0.852499	1.4483	0.90125	0.790641	1.45075	2	0.835773	0.835773
chr10	100277889	100278015	chr10-100277889-DEL-127	chr10	100275001	100300000	0.2856	0.606523	1.03908	0.973229	1.20514	0.982474	1.0405	1.16143	0.901043	0.673427	1.0259	1.10795	1.18289	1.13447	1.34732	0	0.834636	0.672378	0.770427	0	0	0.852678	1.01945	1.14714	0.926019	1.05209	1.09256	3	0.610845	0.610845
chr10	100651023	100651130	chr10-100651023-DEL-108	chr10	100645001	100670000	0.393747	0.870025	0.699853	0.761014	0	0.729172	0	0.710503	0	0.656402	0	0.540687	0.735964	0	0.79575	0.911926	1.01899	0.698666	0.731878	0.730437	0	0.975919	0.793725	1.44636	0.880014	0.53712	0.934955	6	0.0811401	0.0811401
chr10	100651658	100651792	chr10-100651658-DEL-135	chr10	100645001	100670000	0.393747	0.870025	0.699853	0.761014	0	0.729172	0	0.710503	0	0.656402	0	0.540687	0.735964	0	0.79575	0.911926	1.01899	0.698666	0.731878	0.730437	0	0.975919	0.793725	1.44636	0.880014	0.53712	0.934955	6	0.838443	0.838443
chr10	103337766	103338079	chr10-103337766-DEL-314	chr10	103325001	103350000	0.25736	1.17529	1.31661	0.976017	1.19645	0.707928	0.917814	0.71638	0.776928	0.603869	1.11155	1.09477	0.531683	0	1.1764	1.16098	0.479122	0.646533	0.922882	1.45489	0.756607	1.10295	0.943342	0	0.665993	0	1.48824	3	0.789741	0.789741
chr10	103701036	103701111	chr10-103701036-DEL-76	chr10	103685001	103710000	0.963615	1.89544	1.81844	1.86439	2.24823	2.19677	1.578	1.95566	1.88886	1.85725	2.16771	1.85488	1.60256	2.01615	1.63891	1.714	1.57564	2.04863	1.88786	2.26075	1.83185	2.5537	1.51276	2.4063	1.72615	1.69709	2.16918	0	0.0828302	0.0828302
chr10	114101963	114102271	chr10-114101963-DEL-309	chr10	114095001	114120000	0.627178	1.28128	0.918686	0.90261	1.54497	1.12337	0.890018	1.05913	1.0809	0.946305	0.697906	1.37602	1.06429	0.942782	1.15143	1.2521	0.837689	1.11122	0.907394	1.03328	1.06068	1.75028	0.979121	0	1.66358	1.26654	1.00755	1	0.362158	0.362158
chr10	114998265	114998572	chr10-114998265-DEL-308	chr10	114995001	115020000	0.205016	0.491973	0.455976	0.201515	0.351271	0	0.586817	0	0.533496	0.54024	0	0.631018	0.43562	0	0	0	0.294205	0.338461	0.407826	0.365695	0.216669	0.22516	0	0.73071	0.605029	0	0.443755	8	0.704507	0.704507
chr10	118248326	118248397	chr10-118248326-DEL-72	chr10	118235001	118260000	0.322554	0	0	1.03813	0	0.939013	0.577482	0	0	0	0.666613	0	0.77778	0	0	0.718687	1.0385	0	0.820808	0.669419	0	0.990209	0.585149	0	0	0.862168	1.0301	13	1	1
chr10	119427626	119427771	chr10-119427626-DEL-146	chr10	119410001	119435000	0.384167	0.468744	0.591281	0.944887	0.553951	0.763577	0.609287	0.441067	0.998493	0.757134	1.19531	0.620137	0.681488	0.763786	0.640586	0.716766	0.736666	0.768186	0.790864	0.860476	0.711368	1.32691	0.594722	0.93465	0.72659	0.418595	1.10527	0	0.39464	0.39464
chr10	120941625	120941916	chr10-120941625-DEL-292	chr10	120925001	120950000	0.623304	1.41827	1.03056	0.836531	1.38557	1.37006	1.21202	0.669969	0.885005	0.942445	1.25051	1.10673	1.16826	1.37303	1.46634	1.3076	1.33719	1.25569	1.04072	1.41975	1.32705	1.50756	1.17925	1.59864	1.00752	1.05439	1.22729	0	0.622736	0.622736
chr10	121729666	121729979	chr10-121729666-DEL-314	chr10	121720001	121745000	0.518521	0.838587	1.18569	1.09368	1.16514	1.20666	1.37527	0.723326	0.891239	1.13087	0	0.93054	1.04181	0.846862	1.56622	0.964585	1.28532	1.2057	1.21865	1.18039	0.850338	1.29422	0.738217	1.30437	1.22753	1.03614	1.17819	1	0.198164	0.198164
chr10	122611391	122612413	chr10-122611391-DEL-1023	chr10	122610001	122635000	0.213217	0.630255	0	0	0.548632	0	0	1.176	0	0.900011	0.833381	0	0.286194	0	0	1.09028	0.486304	0.675342	0	0	0.668536	0	0.579537	0	0	0.281126	1.05194	13	0.835773	0.835773
chr10	122633343	122633407	chr10-122633343-DEL-65	chr10	122610001	122635000	0.213217	0.630255	0	0	0.548632	0	0	1.176	0	0.900011	0.833381	0	0.286194	0	0	1.09028	0.486304	0.675342	0	0	0.668536	0	0.579537	0	0	0.281126	1.05194	13	0.850137	0.850137
chr10	124230186	124230245	chr10-124230186-DEL-60	chr10	124210001	124235000	0.368518	0.450428	0.349682	0	0.486435	0.89023	0.680998	0.677719	0.405376	0.563802	0	0	0	0.634292	0	0.705168	0	0.323907	0.480321	0.608814	0	0.557581	0.388737	0	0	0.528801	0	10	0.356549	0.356549
chr10	124610897	124611010	chr10-124610897-DEL-114	chr10	124600001	124625000	0.418049	0.844561	0.536331	0.59938	0.854994	0.708265	0.493279	0.490596	1.02647	0.95015	1.06075	0.899858	0.661778	0.697631	0.773171	0.803845	0.915071	0.666485	0.762291	0.552906	0.823727	0.608337	0.531467	0.605604	0.730276	0.438741	0.702065	0	0.451781	0.451781
chr10	131623535	131623585	chr10-131623535-DEL-51	chr10	131620001	131645000	0.267474	0	0	0.478328	0	0.299228	0	0.333824	0	0.610436	0.631294	0	0	0.284507	0	0.454151	0.360911	0	0	0.417141	0	0	0.522505	0	0.400759	0.738807	0	14	0.886154	0.886154
chr10	131624655	131624736	chr10-131624655-DEL-82	chr10	131620001	131645000	0.267474	0	0	0.478328	0	0.299228	0	0.333824	0	0.610436	0.631294	0	0	0.284507	0	0.454151	0.360911	0	0	0.417141	0	0	0.522505	0	0.400759	0.738807	0	14	0.494193	0.494193
chr10	131808212	131808322	chr10-131808212-DEL-111	chr10	131795001	131820000	0.258791	0	0	0	0	0	0	0	0	0	0	0	0	0	0	0.878698	0	0.34068	0	0	0	0	0	0	0.65941	0	0.353159	22	0.646084	0.646084
chr10	131812245	131812324	chr10-131812245-DEL-80	chr10	131795001	131820000	0.258791	0	0	0	0	0	0	0	0	0	0	0	0	0	0	0.878698	0	0.34068	0	0	0	0	0	0	0.65941	0	0.353159	22	0.97831	0.97831
chr10	131884045	131884154	chr10-131884045-DEL-110	chr10	131865001	131890000	1.07387	1.9486	2.10873	1.55297	2.91334	2.18358	2.11633	1.66686	1.91717	1.91478	2.05481	2.32458	2.41392	1.97908	2.2035	2.4398	2.74549	2.22602	1.8202	1.65301	1.54	2.39725	2.12114	2.23396	2.35772	1.80161	2.15665	0	0.486136	0.486136
chr10	131884303	131884516	chr10-131884303-DEL-214	chr10	131865001	131890000	1.07387	1.9486	2.10873	1.55297	2.91334	2.18358	2.11633	1.66686	1.91717	1.91478	2.05481	2.32458	2.41392	1.97908	2.2035	2.4398	2.74549	2.22602	1.8202	1.65301	1.54	2.39725	2.12114	2.23396	2.35772	1.80161	2.15665	0	0.486136	0.486136
chr10	132149776	132149828	chr10-132149776-DEL-53	chr10	132145001	132170000	0.190488	0.565378	0.602917	0.676549	0	0	0.809406	0.557461	0.638765	0	0.827149	0	0.257145	0.658585	0	0.896991	0	0.797897	1.20715	0.781582	0	0.966765	0	0	0.4224	1.05708	0	10	0.789741	0.789741
chr10	132161838	132162139	chr10-132161838-DEL-302	chr10	132145001	132170000	0.190488	0.565378	0.602917	0.676549	0	0	0.809406	0.557461	0.638765	0	0.827149	0	0.257145	0.658585	0	0.896991	0	0.797897	1.20715	0.781582	0	0.966765	0	0	0.4224	1.05708	0	10	0.446944	0.446944
chr10	132356402	132356455	chr10-132356402-DEL-54	chr10	132355001	132380000	0.637598	0.938087	1.4616	0.980426	0.825754	1.52499	1.33335	1.22277	1.53976	0	1.08178	0.696423	0.840896	0.914094	1.328	1.04811	0.644259	1.54705	0.663136	1.47248	1.84199	1.01514	0.717816	0.884038	1.34582	0.980204	0.936355	1	0.759662	0.759662
chr10	132358303	132358360	chr10-132358303-DEL-58	chr10	132355001	132380000	0.637598	0.938087	1.4616	0.980426	0.825754	1.52499	1.33335	1.22277	1.53976	0	1.08178	0.696423	0.840896	0.914094	1.328	1.04811	0.644259	1.54705	0.663136	1.47248	1.84199	1.01514	0.717816	0.884038	1.34582	0.980204	0.936355	1	0.446944	0.446944
chr10	132358384	132358528	chr10-132358384-DEL-145	chr10	132355001	132380000	0.637598	0.938087	1.4616	0.980426	0.825754	1.52499	1.33335	1.22277	1.53976	0	1.08178	0.696423	0.840896	0.914094	1.328	1.04811	0.644259	1.54705	0.663136	1.47248	1.84199	1.01514	0.717816	0.884038	1.34582	0.980204	0.936355	1	0.604919	0.604919
chr10	132358723	132358780	chr10-132358723-DEL-58	chr10	132355001	132380000	0.637598	0.938087	1.4616	0.980426	0.825754	1.52499	1.33335	1.22277	1.53976	0	1.08178	0.696423	0.840896	0.914094	1.328	1.04811	0.644259	1.54705	0.663136	1.47248	1.84199	1.01514	0.717816	0.884038	1.34582	0.980204	0.936355	1	0.777714	0.777714
chr10	132362620	132362700	chr10-132362620-DEL-81	chr10	132355001	132380000	0.637598	0.938087	1.4616	0.980426	0.825754	1.52499	1.33335	1.22277	1.53976	0	1.08178	0.696423	0.840896	0.914094	1.328	1.04811	0.644259	1.54705	0.663136	1.47248	1.84199	1.01514	0.717816	0.884038	1.34582	0.980204	0.936355	1	0.221538	0.221538
chr10	132362633	132363107	chr10-132362633-DEL-475	chr10	132355001	132380000	0.637598	0.938087	1.4616	0.980426	0.825754	1.52499	1.33335	1.22277	1.53976	0	1.08178	0.696423	0.840896	0.914094	1.328	1.04811	0.644259	1.54705	0.663136	1.47248	1.84199	1.01514	0.717816	0.884038	1.34582	0.980204	0.936355	1	0.923077	0.923077
chr10	132521957	132522391	chr10-132521957-DEL-435	chr10	132520001	132545000	0.721681	0.910243	1.04876	1.1953	1.18807	0.716568	0.337184	0.912745	0.999974	1.22507	0.894535	0.92621	0.664527	0.932666	0	0.402062	1.50699	0.790635	0.846713	0.489805	0.336533	1.31351	0	0.821595	0.766806	0	0.609311	3	0.446944	0.446944
chr10	132522095	132522268	chr10-132522095-DEL-174	chr10	132520001	132545000	0.721681	0.910243	1.04876	1.1953	1.18807	0.716568	0.337184	0.912745	0.999974	1.22507	0.894535	0.92621	0.664527	0.932666	0	0.402062	1.50699	0.790635	0.846713	0.489805	0.336533	1.31351	0	0.821595	0.766806	0	0.609311	3	0.955002	0.955002
chr10	132651216	132651307	chr10-132651216-DEL-92	chr10	132635001	132660000	0.685015	1.419	1.39758	1.31464	1.02948	1.61428	1.76723	1.27652	1.90093	1.46225	1.25942	1.25195	1.21441	1.61756	0.967127	1.5927	1.54756	1.67474	1.44801	1.72989	0.784229	2.10868	0	1.2172	1.61134	1.50112	2.17664	1	0.367011	0.367011
chr10	132764631	132764905	chr10-132764631-DEL-275	chr10	132760001	132785000	0.188971	0	0.268756	0.230629	0.53889	0.449291	0.549991	0.631193	0	0	0	0	0	0	0	0	0.625721	0.658154	0.699802	0.456712	0	0	0	0.265237	0	0	0	15	0.886154	0.886154
chr10	132767010	132767077	chr10-132767010-DEL-68	chr10	132760001	132785000	0.188971	0	0.268756	0.230629	0.53889	0.449291	0.549991	0.631193	0	0	0	0	0	0	0	0	0.625721	0.658154	0.699802	0.456712	0	0	0	0.265237	0	0	0	15	0.258577	0.258577
chr10	132771701	132771754	chr10-132771701-DEL-54	chr10	132760001	132785000	0.188971	0	0.268756	0.230629	0.53889	0.449291	0.549991	0.631193	0	0	0	0	0	0	0	0	0.625721	0.658154	0.699802	0.456712	0	0	0	0.265237	0	0	0	15	0.96	0.96
chr10	132771875	132772144	chr10-132771875-DEL-270	chr10	132760001	132785000	0.188971	0	0.268756	0.230629	0.53889	0.449291	0.549991	0.631193	0	0	0	0	0	0	0	0	0.625721	0.658154	0.699802	0.456712	0	0	0	0.265237	0	0	0	15	0.356549	0.356549
chr10	132772282	132772389	chr10-132772282-DEL-108	chr10	132760001	132785000	0.188971	0	0.268756	0.230629	0.53889	0.449291	0.549991	0.631193	0	0	0	0	0	0	0	0	0.625721	0.658154	0.699802	0.456712	0	0	0	0.265237	0	0	0	15	0.39464	0.39464
chr10	133317302	133317946	chr10-133317302-DEL-645	chr10	133300001	133325000	0.636064	0.792613	0.940874	0.622528	0.747077	1.19536	0.79365	0	0.780069	1.15741	0.572625	0.772927	1.12406	1.08365	1.10479	0.509635	0.732789	1.06294	1.06115	0.999371	1.25719	0.960827	1.03125	0.937001	0.827367	0.790112	1.4176	1	0.143504	0.143504
chr10	133431213	133431896	chr10-133431213-DEL-684	chr10	133415001	133440000	0.808224	1.89012	1.77834	2.00364	1.76775	1.83162	1.86906	1.74158	1.90859	1.97139	1.32609	1.88416	2.07662	1.35442	1.63616	1.70783	1.9541	1.78703	1.43342	1.45538	1.41581	1.55209	1.51172	1.57924	2.04384	1.72987	1.71245	0	0.615385	0.615385
chr10	133431272	133431423	chr10-133431272-DEL-152	chr10	133415001	133440000	0.808224	1.89012	1.77834	2.00364	1.76775	1.83162	1.86906	1.74158	1.90859	1.97139	1.32609	1.88416	2.07662	1.35442	1.63616	1.70783	1.9541	1.78703	1.43342	1.45538	1.41581	1.55209	1.51172	1.57924	2.04384	1.72987	1.71245	0	0.806683	0.806683
chr10	133610766	133610940	chr10-133610766-DEL-175	chr10	133605001	133630000	0.40801	0	0	0	0	0	0.471554	0	0	0	0	0	0	0	0	0	0	0	0	0	0	0	0	0	0	0	0	25	0.721104	0.721104
chr11	363227	363316	chr11-363227-DEL-90	chr11	355001	380000	1.05358	1.75869	1.28663	1.23379	1.5413	1.72282	1.21417	0	1.08376	0	1.71367	1.17115	1.20114	1.24235	0	1.47233	1.56687	0.822906	0.818452	1.35283	1.58658	1.7849	1.81801	0	1.70468	1.36718	0	5	0.697882	0.697882
chr11	363752	363835	chr11-363752-DEL-84	chr11	355001	380000	1.05358	1.75869	1.28663	1.23379	1.5413	1.72282	1.21417	0	1.08376	0	1.71367	1.17115	1.20114	1.24235	0	1.47233	1.56687	0.822906	0.818452	1.35283	1.58658	1.7849	1.81801	0	1.70468	1.36718	0	5	0.527029	0.527029
chr11	374934	375035	chr11-374934-DEL-102	chr11	355001	380000	1.05358	1.75869	1.28663	1.23379	1.5413	1.72282	1.21417	0	1.08376	0	1.71367	1.17115	1.20114	1.24235	0	1.47233	1.56687	0.822906	0.818452	1.35283	1.58658	1.7849	1.81801	0	1.70468	1.36718	0	5	0.301538	0.301538
chr11	430872	431510	chr11-430872-DEL-639	chr11	430001	455000	0.390211	0	0	0	0	0.68998	0.345872	0	0.307756	0.396482	0	0	0.231918	0	0	0	0	0.611033	0	0	0.711697	0.442565	0	0	0	0	0	18	0.203542	0.203542
chr11	436699	436819	chr11-436699-DEL-121	chr11	430001	455000	0.390211	0	0	0	0	0.68998	0.345872	0	0.307756	0.396482	0	0	0.231918	0	0	0	0	0.611033	0	0	0.711697	0.442565	0	0	0	0	0	18	0.769231	0.769231
chr11	442404	442466	chr11-442404-DEL-63	chr11	430001	455000	0.390211	0	0	0	0	0.68998	0.345872	0	0.307756	0.396482	0	0	0.231918	0	0	0	0	0.611033	0	0	0.711697	0.442565	0	0	0	0	0	18	0.832626	0.832626
chr11	736201	736468	chr11-736201-DEL-268	chr11	725001	750000	0.328511	0	0	0	0	0	0	0	0	0	0	0	0	0	0	0.982998	0	0	0	0	0	0	0	0	0	0	0	25	0.832626	0.832626
chr11	736308	736414	chr11-736308-DEL-107	chr11	725001	750000	0.328511	0	0	0	0	0	0	0	0	0	0	0	0	0	0	0.982998	0	0	0	0	0	0	0	0	0	0	0	25	0.882274	0.882274
chr11	1078679	1078944	chr11-1078679-DEL-266	chr11	1070001	1095000	0.344954	0.865683	0.866074	0.81962	0	0.829286	0	0	0.745792	0	0.414736	1.42916	0	0.671115	0	0.379421	0.750692	0.708947	1.3036	0.746114	0.59202	0.581227	0.857433	0.862161	0.879629	1.10175	0.990695	6	0.848973	0.848973
chr11	1079544	1081506	chr11-1079544-DEL-1963	chr11	1070001	1095000	0.344954	0.865683	0.866074	0.81962	0	0.829286	0	0	0.745792	0	0.414736	1.42916	0	0.671115	0	0.379421	0.750692	0.708947	1.3036	0.746114	0.59202	0.581227	0.857433	0.862161	0.879629	1.10175	0.990695	6	0.551193	0.551193
chr11	1429739	1431912	chr11-1429739-DEL-2174	chr11	1430001	1455000	0.23936	0	0	0.248687	0.488293	0.692349	0	1.01462	0.327607	0	0	0	0.649901	0	0	0	0.431421	0.354807	0.862526	0.604415	0.542101	0	0	0	0	0.434984	0	14	1	1
chr11	1429907	1430899	chr11-1429907-DEL-993	chr11	1430001	1455000	0.23936	0	0	0.248687	0.488293	0.692349	0	1.01462	0.327607	0	0	0	0.649901	0	0	0	0.431421	0.354807	0.862526	0.604415	0.542101	0	0	0	0	0.434984	0	14	0.461357	0.461357
chr11	1432951	1433136	chr11-1432951-DEL-186	chr11	1430001	1455000	0.23936	0	0	0.248687	0.488293	0.692349	0	1.01462	0.327607	0	0	0	0.649901	0	0	0	0.431421	0.354807	0.862526	0.604415	0.542101	0	0	0	0	0.434984	0	14	1	1
chr11	1434603	1434711	chr11-1434603-DEL-109	chr11	1430001	1455000	0.23936	0	0	0.248687	0.488293	0.692349	0	1.01462	0.327607	0	0	0	0.649901	0	0	0	0.431421	0.354807	0.862526	0.604415	0.542101	0	0	0	0	0.434984	0	14	0.362158	0.362158
chr11	1435233	1435319	chr11-1435233-DEL-87	chr11	1430001	1455000	0.23936	0	0	0.248687	0.488293	0.692349	0	1.01462	0.327607	0	0	0	0.649901	0	0	0	0.431421	0.354807	0.862526	0.604415	0.542101	0	0	0	0	0.434984	0	14	0.878479	0.878479
chr11	1543092	1543141	chr11-1543092-DEL-50	chr11	1520001	1545000	0.334603	0	0.855565	0	0	0.64864	0	0.832326	0	0	0	0	0	0.325362	0	0.847643	0.230431	1.08089	0.644217	0	0.908928	0.366337	0.227809	0	0.459187	0	0.94685	13	0.927908	0.927908
chr11	1641755	1642225	chr11-1641755-DEL-471	chr11	1630001	1655000	0.370706	0.630195	0.869338	1.00684	0.440428	1.25681	0.777282	1.03589	0.773287	0.0839996	0	0	0.676324	0.876828	0.575747	1.27444	0.521882	0.386273	0	1.03362	0.443306	0.695163	0.522379	0	0.94317	0.277303	0	5	0.806683	0.806683
chr11	1686732	1686800	chr11-1686732-DEL-69	chr11	1685001	1710000	0.470323	0.561869	0.869338	0	0.719671	1.25681	0	1.03589	0.773287	0.779234	0.735681	0	0	0.876828	0	0	0	0.556934	0.729729	0	0	1.01828	0	1.12648	0.94317	0.56682	0	11	0.120365	0.120365
chr11	1950578	1950695	chr11-1950578-DEL-118	chr11	1945001	1970000	0.642344	0	0	0.924487	0	0	0	0.995326	0	0	0	0	0	0	0	1.51584	0.794649	0	0	0	0	0	0	0	0	0	0	22	0.923077	0.923077
chr11	1950578	1950695	chr11-1950578-DEL-118	chr11	1950001	1975000	0.388462	0	0	0.924487	0	0	0	0.995326	0	0	0	0	0	0	0	1.51584	0.794649	0	0	0	0	1.04888	0	0	0	0	0	21	0.846154	0.923077
chr11	2291489	2291697	chr11-2291489-DEL-209	chr11	2280001	2305000	0.509187	1.42873	0.90655	0.533727	0.593421	1.10066	1.05351	1.5176	1.04814	1.02733	1.20026	0.932802	1.41637	0.986764	1.32809	1.02982	1.27423	1.2989	1.1665	1.29398	1.28833	1.48516	0.924667	0.883848	1.2536	0.76848	1.35716	0	0.00846154	0.00846154
chr11	3103707	3103764	chr11-3103707-DEL-58	chr11	3090001	3115000	0.64182	1.11003	1.14074	1.23829	1.09232	1.0172	1.29045	0.942639	0.988521	1.08374	1.01148	0.874658	1.00302	1.16711	1.19356	2.15864	1.70561	1.02788	1.19761	1.26645	1.17442	1.32006	0.944284	1.40406	0.991407	1.01092	1.56184	0	0.39464	0.39464
chr11	3103775	3103893	chr11-3103775-DEL-119	chr11	3090001	3115000	0.64182	1.11003	1.14074	1.23829	1.09232	1.0172	1.29045	0.942639	0.988521	1.08374	1.01148	0.874658	1.00302	1.16711	1.19356	2.15864	1.70561	1.02788	1.19761	1.26645	1.17442	1.32006	0.944284	1.40406	0.991407	1.01092	1.56184	0	0.571611	0.571611
chr11	7432560	7432634	chr11-7432560-DEL-75	chr11	7425001	7450000	0.476623	0.56149	0.774897	0.815579	1.16725	0.662513	0.633349	0.664813	0	0.874462	0	0.825525	0.588187	0.798599	0	0.835831	0.972315	0.811319	0.765561	0.939202	0.582856	1.10796	0.935634	0.750685	1.09655	0.873904	0.729659	3	0.692499	0.692499
chr11	8910561	8910637	chr11-8910561-DEL-77	chr11	8895001	8920000	0.404627	0.553786	0.555723	0.737009	0.514325	0.540277	0.208905	0.232263	0.3737	0.479578	0.570515	0.469391	0.459727	0.539552	0	0	0	0.37799	0.194728	0.623844	0.302742	0.491622	0.395983	0	0.342305	0	0.44077	5	0.324397	0.324397
chr11	8978389	8978466	chr11-8978389-DEL-78	chr11	8960001	8985000	0.558019	0.571965	0.563913	0	1.15407	0	0.922892	0.609488	0.971371	0.69652	0.880281	1.00184	0.459727	0.959373	0	0	0.455067	0.904247	0.789114	1.11931	0.620497	0	0.976128	0.679844	0.468936	0.866627	0.825894	5	0.874078	0.874078
chr11	9302094	9303103	chr11-9302094-DEL-1010	chr11	9300001	9325000	0.360586	0	0	0	0	0	0.332808	0	0	0	0.50434	0.273901	0.179829	0	0.0970692	0	0	0	0	0.741218	0.431173	0	0	0	0	0.554791	0	18	1	1
chr11	9316806	9317074	chr11-9316806-DEL-269	chr11	9300001	9325000	0.360586	0	0	0	0	0	0.332808	0	0	0	0.50434	0.273901	0.179829	0	0.0970692	0	0	0	0	0.741218	0.431173	0	0	0	0	0.554791	0	18	0.736605	0.736605
chr11	9504240	9505252	chr11-9504240-DEL-1013	chr11	9500001	9525000	0.726007	1.33221	1.27069	1.6634	1.26352	1.36444	1.2668	1.47073	1.32342	1.27612	1.35251	1.31457	1.36258	2.00218	0.864718	1.7598	1.2138	1.11344	1.32349	1.64028	1.32822	1.45668	1.56846	1.57039	1.10167	1.16354	1.32738	0	0.613969	0.613969
chr11	15229945	15230002	chr11-15229945-DEL-58	chr11	15225001	15250000	0.341551	0.902273	0.675122	0.924747	0.614036	0.902822	0	0.847031	0.814729	0.791411	0.937345	0.821519	0.776896	0.908262	1.03888	0.928168	1.02589	0.83174	0.707978	0.833235	1.0969	0.855668	0.986231	0.677663	0.657603	0.559771	0.783238	1	0.495435	0.495435
chr11	17711461	17711532	chr11-17711461-DEL-72	chr11	17710001	17735000	0.255387	0	0.586186	0.742157	0.687391	0.611493	0.587649	0	0.635202	0.595447	0.418826	0.562166	0.662686	0.734501	0.835499	0.572107	0	0.75035	0.653499	0	0.812806	1.46639	0.917406	1.08749	0.785379	0.728471	0.907438	4	0.0786865	0.0786865
chr11	26529258	26529404	chr11-26529258-DEL-147	chr11	26520001	26545000	0.220994	0	0	0	0.479044	0	0	0	0	0	0	0	0.1935	0	0	0	0	0.372311	0	0	0	0.333295	0.490759	0.381314	0.94132	0.20779	0.541552	17	0.692308	0.692308
chr11	26658402	26658500	chr11-26658402-DEL-99	chr11	26640001	26665000	0.345517	0	0	0	0	0.223428	0	0.262506	0.428256	0	0	0.386949	0	0.545133	0.357547	0	1.46439	0.937058	0	0.584304	0.814397	0	0.961335	0.886929	1.15278	0.435021	0	12	0.535717	0.535717
chr11	31372227	31376099	chr11-31372227-DEL-3873	chr11	31350001	31375000	0.429345	1.02276	1.03112	0	0.839728	0	0.263454	1.09607	0.993578	1.02389	0.81636	0.677552	0.84356	0.698261	1.01349	0	0.703304	0.983119	0.663546	0.635686	0.660076	0.852695	0	0	0.889809	0.63995	0.688119	5	0.806683	0.806683
chr11	33362894	33362951	chr11-33362894-DEL-58	chr11	33340001	33365000	0.95108	2.07319	1.78578	2.0048	2.50192	1.9758	1.67092	1.42507	2.04996	1.65798	1.41268	1.96825	1.71589	1.6808	1.50117	2.46302	2.03641	2.2966	1.90092	1.98757	1.7013	2.15719	2.01474	2.79771	2.0515	1.92177	2.25904	0	0.56045	0.56045
chr11	36676376	36676705	chr11-36676376-DEL-330	chr11	36670001	36695000	0.643861	0.997747	0.657338	0.844311	0.950412	0.830369	0.928222	0.744829	0.804331	0.887131	0.689747	1.30594	0.864226	1.12552	0.923004	1.16749	0.882943	0.776533	0.951836	1.06209	0.55975	1.28536	1.38216	0	0.732721	0.872154	1.38915	1	0.604919	0.604919
chr11	36756252	36756563	chr11-36756252-DEL-312	chr11	36755001	36780000	0.814329	1.21081	0	1.32516	1.37536	1.20942	1.33066	0	0.910847	1.19277	1.31287	1.05527	0	1.12586	0	1.08689	1.20369	1.31523	0	0.976815	1.55356	0	1.52773	1.05125	1.4466	1.05405	1.37073	6	0.744615	0.744615
chr11	37427255	37427346	chr11-37427255-DEL-92	chr11	37420001	37445000	0.220897	0	0.351191	0	0.555311	0.370592	0	0.819663	0.450702	0.404239	0.100367	0.702561	0	0.280064	0.362752	0	0.430783	0	0.467366	0	0.630694	0.520816	0.371816	0	0.489237	0.298637	0	9	0.221538	0.221538
chr11	37940496	37940820	chr11-37940496-DEL-325	chr11	37930001	37955000	0.285575	0	0	0	0	0	0	0	0	0	0.0607589	0	0	0	0	0	0	0	0	0	0	0.466534	0.507414	0	0	0	0	23	0.910143	0.910143
chr11	37940496	37940820	chr11-37940496-DEL-325	chr11	37935001	37960000	0.285575	0	0	0	0	0	0	0	0	0	0.0607589	0	0	0	0	0	0	0	0	0	0	0.466534	0.507414	0	0	0	0	23	0.910143	0.910143
chr11	43888044	43888349	chr11-43888044-DEL-306	chr11	43865001	43890000	0.315913	0.567622	0.850732	0.609154	0.61756	0.996631	0.71371	0	0.607938	0.716326	0.923339	0.624128	0.659365	0.888955	0.658902	0.710036	0.696615	0.729211	0.516552	0	0.757654	1.27079	0.577635	0.668207	0.532901	0.357661	0.853582	2	0.955002	0.955002
chr11	43936451	43936508	chr11-43936451-DEL-58	chr11	43935001	43960000	0.205187	0	0.366826	0	0.291061	0.434638	0.252598	0.171359	0	0.367433	0	0	0	0	0	0	0	0.411287	0	0.201736	0.039592	0	0	0.557644	0	0.200662	0	15	0.0351657	0.0351657
chr11	44721640	44721690	chr11-44721640-DEL-51	chr11	44715001	44740000	0.244781	0.509184	0.183074	0.409228	0.515445	0.248942	0.23726	0	0.238158	0.467414	0	0	0	0.30007	0	0	0.517463	0.156708	0.379333	0.124629	0	0.346166	0.259432	0	0.380939	0.412941	0.504419	8	0.0169323	0.0169323
chr11	45111213	45111405	chr11-45111213-DEL-193	chr11	45095001	45120000	0.666244	1.20235	0.967409	1.08607	1.61502	1.53277	1.15447	1.84914	1.74518	0	1.0949	1.41818	1.44434	1.67679	1.0045	1.71714	1.40171	1.46035	1.31047	1.44267	1.49084	1.43948	1.60948	1.55814	1.76782	1.00554	1.2492	1	0.798805	0.798805
chr11	46014685	46015031	chr11-46014685-DEL-347	chr11	46005001	46030000	0.260829	0.817078	0.326768	0.542301	0	0.231099	0	0.17927	0.423456	0.428552	0	0.314441	0	0.413726	0	0.892264	0.344408	0.383454	0.339498	0.34428	0.458708	0.307808	0	0.133542	0.714923	0.283056	0	7	0.0480268	0.0480268
chr11	46139468	46140849	chr11-46139468-DEL-1382	chr11	46115001	46140000	0.609818	1.10891	0.834155	1.38136	0.704867	1.06246	1.04173	0.981826	0	1.58487	0.8135	0.954517	0.504424	0.802113	1.23369	1.27662	1.32915	1.05946	1.0648	0.872678	0.871666	0.903769	0.821884	0	1.20027	0.691055	1.02907	2	0.3083	0.3083
chr11	48658643	48658853	chr11-48658643-DEL-211	chr11	48640001	48665000	0.483946	0	0.370994	0.48157	0	0	0	1.26188	0.320058	0.74513	0.447941	0	0	0	0.303919	0	0	0.331948	0.623239	0	0.52205	0.57691	0	0.31992	0	0	1.02264	13	0.915864	0.915864
chr11	48907393	48907703	chr11-48907393-DEL-311	chr11	48900001	48925000	0.351315	0	0.958593	0.638963	1.09564	0.398665	1.21422	1.29548	0.277807	0	0	0.428879	0	0	0	0	0	0	1.15216	0	0.91682	1.30135	0	0.905577	0	0.978428	0	13	0.321727	0.321727
chr11	48914379	48914549	chr11-48914379-DEL-171	chr11	48900001	48925000	0.351315	0	0.958593	0.638963	1.09564	0.398665	1.21422	1.29548	0.277807	0	0	0.428879	0	0	0	0	0	0	1.15216	0	0.91682	1.30135	0	0.905577	0	0.978428	0	13	0.798805	0.798805
chr11	48923147	48923817	chr11-48923147-DEL-671	chr11	48900001	48925000	0.351315	0	0.958593	0.638963	1.09564	0.398665	1.21422	1.29548	0.277807	0	0	0.428879	0	0	0	0	0	0	1.15216	0	0.91682	1.30135	0	0.905577	0	0.978428	0	13	0.643563	0.643563
chr11	55721472	55721799	chr11-55721472-DEL-328	chr11	55710001	55735000	0.826582	0.945447	0.84942	1.54694	1.04968	1.19275	0.667843	0	0	0	0	0.919019	1.26864	0.72785	0	1.26833	0.553762	0	0	1.41026	0.533363	0	0	1.8318	1.10296	0.315527	0.211165	9	0.789741	0.789741
chr11	59041813	59042144	chr11-59041813-DEL-332	chr11	59035001	59060000	0.560771	1.19345	1.62879	0.986931	1.25364	1.20811	1.3193	1.28393	0.878926	1.04386	1.22907	1.37787	0.994768	1.21593	1.73543	1.20322	1.48905	1.51758	1.27117	1.18618	1.27664	1.56587	1.05855	1.27362	1.66537	1.41023	1.42313	0	0.441538	0.441538
chr11	59672311	59672376	chr11-59672311-DEL-66	chr11	59670001	59695000	1.07196	1.85765	1.94644	2.21112	2.01511	1.85767	1.51987	1.63473	1.67194	1.73898	2.06619	1.82508	1.55055	1.66284	1.59245	1.89072	2.31524	1.76792	1.62945	1.60383	1.59634	2.00068	1.43835	2.00725	1.84333	2.01253	2.41225	0	0.530782	0.530782
chr11	59690813	59690864	chr11-59690813-DEL-52	chr11	59670001	59695000	1.07196	1.85765	1.94644	2.21112	2.01511	1.85767	1.51987	1.63473	1.67194	1.73898	2.06619	1.82508	1.55055	1.66284	1.59245	1.89072	2.31524	1.76792	1.62945	1.60383	1.59634	2.00068	1.43835	2.00725	1.84333	2.01253	2.41225	0	0.910143	0.910143
chr11	60622560	60622764	chr11-60622560-DEL-205	chr11	60620001	60645000	0.407744	1.1527	0.808665	0.937318	0.897329	0.958671	0.63531	0	0.820606	0.763066	0.875751	1.00502	0.752471	1.0315	0.992097	0	0.620611	1.30287	1.10171	0.761697	0.820252	0.892817	0.620337	0.984934	0.775393	0.907363	0.99539	2	0.431892	0.431892
chr11	61205470	61243124	chr11-61205470-DEL-37655	chr11	61185001	61210000	1.40428	0	0	4.16003	4.34795	2.69987	1.61097	3.75986	0	3.06509	1.5914	0	2.73508	2.84242	0	0	0	3.08255	2.24017	3.48475	0	0	1.31203	2.77672	2.14643	0	2.02551	10	0.686632	0.762311
chr11	61205470	61243124	chr11-61205470-DEL-37655	chr11	61235001	61260000	0.842601	3.06193	0	0	0	0	0.763952	0	0	0	0	0	0	0	0	0	0	0	0	0	0	0	1.76822	0	0	0	0	23	0.762311	0.762311
chr11	64171758	64171982	chr11-64171758-DEL-225	chr11	64150001	64175000	0.941451	1.79067	1.87612	1.94463	2.32532	1.92082	2.12959	1.58481	2.09949	2.07528	1.66082	2.14711	1.9984	2.53003	2.61675	1.68875	2.41355	1.74217	1.68613	1.91702	1.80972	1.79684	1.75227	1.59359	2.08911	1.69286	1.72777	0	0.45703	0.45703
chr11	65249132	65249191	chr11-65249132-DEL-60	chr11	65245001	65270000	0.373956	0.353733	0.143126	0	0	0	0.491009	0	0.387101	0	0	0	0	0	0	0	0	0.400032	0.841141	0	0	0	0	0.317639	0	0	0	19	0.769231	0.769231
chr11	67731932	67732104	chr11-67731932-DEL-173	chr11	67710001	67735000	0.408434	0	0.292867	1.03778	0.526452	0.966808	0.996312	0.523045	0	0.824262	0.56124	0	0.675473	0	1.48552	0.531405	0	0.646138	0.765562	0.974127	0.652194	1.15909	0.672941	0	0.593565	0.929902	0.907918	6	0.870544	0.870544
chr11	68466854	68466981	chr11-68466854-DEL-128	chr11	68445001	68470000	0.816434	1.25715	1.31149	1.36876	1.23994	1.21232	1.0401	0.690735	1.33857	1.52871	1.05257	1.28025	1.17458	1.05872	1.12564	1.17056	0.945885	1.43607	1.07417	1.01375	1.02972	1.21593	0.998519	1.43688	1.04885	1.05019	1.31576	0	0.45703	0.45703
chr11	71584541	71584778	chr11-71584541-DEL-238	chr11	71575001	71600000	0.392132	1.45894	0.627415	0	1.75974	1.11506	0	0	1.00844	0	1.54206	1.17342	1.08412	1.21244	1.21299	0	1.60912	1.04005	0.899907	1.00903	1.57702	0.980929	0.936908	0	1.6287	0	0	8	0.815935	0.815935
chr11	75542045	75542190	chr11-75542045-DEL-146	chr11	75530001	75555000	0.762048	1.11606	1.52066	1.26216	1.48007	1.49086	1.37784	1.60051	1.53902	1.48333	1.59219	1.3884	1.32903	1.90552	1.62348	1.97565	1.89461	1.33889	1.61226	1.65571	1.51248	1.96274	1.46276	1.68755	1.68747	1.61961	1.88511	0	0.165427	0.165427
chr11	76692544	76692809	chr11-76692544-DEL-266	chr11	76680001	76705000	1.05648	2.16971	2.2644	1.80189	2.16785	2.59492	2.14219	1.68204	2.00538	1.82835	1.84152	2.19214	1.73432	2.30702	1.96699	2.17318	2.12634	2.33231	1.7849	2.016	2.23452	2.43506	2.13801	1.6941	1.70137	1.83827	2.18667	0	0.886154	0.886154
chr11	76934662	76934714	chr11-76934662-DEL-53	chr11	76910001	76935000	0.450867	0.888113	1.25729	0.974035	1.19493	0.814763	1.08353	0	0.965234	1.09002	1.18971	1.11361	0.888313	1.28575	0	0.820243	1.34962	1.23993	0.762012	0.851668	0.875153	1.23076	1.05679	0.787283	1.32343	0.732651	0.864365	2	0.656457	0.656457
chr11	85012140	85012342	chr11-85012140-DEL-203	chr11	85005001	85030000	0.225649	0.328041	0	0.64178	0	0	0	0	0	0	0	0	0.395786	0.526362	0	0.490181	0	0	0.566507	0	0	0	0.319454	0.407103	0	0.493192	0.829532	16	0.275385	0.275385
chr11	87977425	87977484	chr11-87977425-DEL-60	chr11	87955001	87980000	0.266475	0	0	0	0.237502	0.328045	0	0	0	0.438398	0	0.244514	0.33554	0.195717	0	0.318524	0	0	0.244613	0	0	0.560245	0	0	0	0	0	17	0.387456	0.387456
chr11	90460539	90462829	chr11-90460539-DEL-2291	chr11	90455001	90480000	0.226933	0.161203	0.349818	0.739475	0.58988	0.558627	0.711484	0.77124	0.464378	0.943293	0.448088	0.599251	0.518869	0.545945	0.579045	0	0.632571	0.486456	0.745171	0.638287	0.381486	0.901804	0.981156	0.779119	0.788777	0.296387	0	2	0.196088	0.196088
chr11	100567920	100568064	chr11-100567920-DEL-145	chr11	100550001	100575000	0.253095	0	0.857374	0.510232	0	0.81858	0.833097	0.749569	0.805483	0.669229	0.848468	0.806624	0	0.721413	0.767691	0	0.928056	0.884705	0	0	1.11709	1.544	0.889854	0.734517	1.01761	0	0	8	0.910143	0.910143
chr11	107862332	107862527	chr11-107862332-DEL-196	chr11	107860001	107885000	0.205099	0	0	0	0	0	0.323019	0	0	0	0	0	0	0	0	0.0420241	0	0	0	0	0	0	0	0	0	0	0	24	0.744473	0.744473
chr11	107913391	107917683	chr11-107913391-DEL-4293	chr11	107915001	107940000	0.311556	0.388079	0.514073	0.403072	0.356862	0	0.306263	0.487012	0.285083	0.487963	0.591567	0.475269	0	0.598891	0	0	0.390586	0.441497	0.399387	0.371198	0.576405	0.731115	0.590494	0.537425	0.445012	0.328982	0.313681	4	0.330176	0.330176
chr11	110105975	110106300	chr11-110105975-DEL-326	chr11	110085001	110110000	0.801028	0.955388	1.24426	1.18372	1.20196	1.16495	0.830024	0.948645	1.07044	1.40783	1.43073	0.704636	0.941205	0.944853	0.768623	0.75686	1.0646	0.937053	0.93913	1.07966	0.597447	1.2526	0.793309	1.58894	0.990287	1.10824	1.21376	0	0.113077	0.113077
chr11	110444646	110444705	chr11-110444646-DEL-60	chr11	110435001	110460000	0.876139	1.44276	1.31487	1.59161	1.47357	1.7636	1.39175	1.8909	1.3708	1.55125	1.31226	1.50829	1.09862	1.63592	1.11639	0.998751	1.44191	1.25564	1.26621	1.65876	0.927047	1.22076	1.29722	1.249	1.10331	1.16928	1.13886	0	0.711336	0.711336
chr11	111353916	111353972	chr11-111353916-DEL-57	chr11	111340001	111365000	0.905311	0.856781	1.09996	0.949863	1.07594	1.02133	0.924427	0.883317	1.04413	1.02723	1.27799	1.31662	0.748471	1.01095	0.801009	1.09991	1.46196	1.0865	0.916414	0.973837	1.0197	1.16777	1.0135	0.260344	1.12135	0.68206	0.817434	0	0.427261	0.427261
chr11	114622177	114622260	chr11-114622177-DEL-84	chr11	114605001	114630000	0.920974	1.17757	0	1.15935	0	1.37654	1.78076	0	0	0	1.58718	1.11682	0	1.14888	1.64509	1.86509	1.83418	0	0	1.87174	1.54002	1.9745	2.21555	2.24549	2.42783	1.16369	0	9	0.789741	0.789741
chr11	114622177	114622260	chr11-114622177-DEL-84	chr11	114615001	114640000	0.920974	1.17757	0	1.15935	0	0	1.78076	0	0	2.21167	1.58718	1.11682	1.63919	1.14888	0	1.86509	1.83418	1.50174	0	1.87174	1.54002	1.9745	0	2.24549	2.42783	1.16369	0	9	0.295426	0.590853
chr11	120516932	120517657	chr11-120516932-DEL-726	chr11	120495001	120520000	0.823318	1.31817	1.38115	1.18104	1.40961	1.45223	1.06963	1.41626	1.1304	1.20456	1.44916	1.26262	1.14112	1.13237	1.39604	1.64718	1.62671	1.06767	1.54433	1.63642	1.19619	1.81957	1.32874	2.17718	1.47906	1.52652	1.81445	0	0.705138	0.705138
chr11	125426490	125426614	chr11-125426490-DEL-125	chr11	125415001	125440000	0.30343	0.490875	0.554466	0.635464	0.899223	0.754988	0.424143	0.732623	0.53783	0.465978	0.752336	0.509487	0	0.610343	0	0.422189	0	0	0.747518	0	0.788179	0.445416	0.674231	1.08898	0.819792	0.593218	0.592498	5	0.418413	0.418413
chr11	127079214	127079441	chr11-127079214-DEL-228	chr11	127065001	127090000	0.230948	0.166226	0	0	0	0.20065	0.128514	0.255785	0.141059	0.284288	0.354177	0	0	0.143936	0	0	0	0	0	0	0.496928	0.156103	0.261969	0.20849	0	0	0.498708	13	0.659889	0.659889
chr11	127079214	127079289	chr11-127079214-DEL-76	chr11	127065001	127090000	0.230948	0.166226	0	0	0	0.20065	0.128514	0.255785	0.141059	0.284288	0.354177	0	0	0.143936	0	0	0	0	0	0	0.496928	0.156103	0.261969	0.20849	0	0	0.498708	13	0.97831	0.97831
chr11	130431460	130431525	chr11-130431460-DEL-66	chr11	130420001	130445000	0.487489	0.989878	1.01004	0.838066	0.807505	1.11114	1.25582	0.584736	0.755301	1.00771	1.1504	0.768047	1.09349	1.32373	1.05401	0.927954	1.00815	0.777008	1.20945	1.10799	1.15112	1.69194	1.06629	1.41161	0.876649	0.679632	1.11339	0	0.705138	0.705138
chr11	134046062	134046151	chr11-134046062-DEL-90	chr11	134035001	134060000	0.35108	0.867604	1.02406	0.69376	0.910588	0.837802	0.641895	1.18541	1.19411	1.3426	0.87475	0.904242	0.895732	0	0.98612	1.10322	0.977063	1.01569	0.877921	0	0.846389	1.11499	0.893501	0.877458	1.07176	0.788575	1.06895	2	0.51694	0.51694
chr12	151076	151232	chr12-151076-DEL-157	chr12	150001	175000	0.197825	0	0	0.124626	0.303129	0	0	0	0	0	0	0	0	0	0	0	0	0	0	0	0.408966	0	0	0.303768	0	0	0	22	0.667254	0.667254
chr12	258966	259085	chr12-258966-DEL-120	chr12	240001	265000	0.470942	0.767528	0.833841	1.14351	0	0.893841	0.785122	0.649162	0.801568	0.957833	0.740021	0	0.770636	0	0.88167	0.952884	0	0.841425	0.906522	0.963526	0.719781	0.883568	0.789768	0	0.815495	0.743794	0.984566	5	0.208741	0.208741
chr12	259248	259307	chr12-259248-DEL-60	chr12	240001	265000	0.470942	0.767528	0.833841	1.14351	0	0.893841	0.785122	0.649162	0.801568	0.957833	0.740021	0	0.770636	0	0.88167	0.952884	0	0.841425	0.906522	0.963526	0.719781	0.883568	0.789768	0	0.815495	0.743794	0.984566	5	0.367011	0.367011
chr12	435049	435127	chr12-435049-DEL-79	chr12	435001	460000	0.548166	0	1.93176	0	1.86451	1.70898	1.64871	0	1.30702	1.51295	1.78373	1.30646	1.4825	0	1.6696	1.87076	0	1.3808	1.45495	1.86652	1.25786	1.87937	1.53909	0	1.88988	1.70237	2.2115	6	1	1
chr12	2407295	2407397	chr12-2407295-DEL-103	chr12	2395001	2420000	0.277126	0.499838	0.64585	0.906627	0.60341	0.744847	0.442431	0.508648	0	0.364531	0.52987	0.79734	0.323995	0.379517	0	0.452098	0.903929	0.671301	0.645353	0.374351	0	0.733984	0.640007	0.269736	0.857702	0.498717	0.672479	3	0.768887	0.768887
chr12	7816067	7816403	chr12-7816067-DEL-337	chr12	7810001	7835000	0.599088	1.30513	1.56809	1.07194	1.45085	1.24637	1.27425	0.955194	1.29454	0.759792	0	0.819186	1.09465	1.2434	1.07504	1.67003	1.5924	1.74557	1.17858	1.46577	1.09813	1.58874	1.61669	1.29747	1.38012	1.29602	1.11924	1	0.157008	0.157008
chr12	8446979	8447061	chr12-8446979-DEL-83	chr12	8435001	8460000	0.891231	0	0	0	0	0	0	0	0	0	0	0	0	0	0	0.525662	0	0	0	0	0	0	0	0	0	0	0	25	0.94	0.94
chr12	10146757	10146914	chr12-10146757-DEL-158	chr12	10130001	10155000	0.654286	1.09808	0.877637	1.20576	1.42862	1.28373	0.977909	0.914788	1.12592	1.21363	0.969133	1.20017	1.05806	0.825973	0.836578	0.998184	1.15705	1.09693	0.787359	1.17992	1.14	1.4366	1.2224	1.02629	1.11043	0.925485	1.08067	0	0.692499	0.692499
chr12	11873482	11874219	chr12-11873482-DEL-738	chr12	11865001	11890000	0.232175	0	0	0.714593	1.00652	0	0	0	0	0.623225	0	0	0	0.892358	0	0	0	0.912685	1.04341	0.863117	0	0	0.539166	0.87253	0	0	0	17	0.643563	0.643563
chr12	11873482	11874219	chr12-11873482-DEL-738	chr12	11870001	11895000	0.232175	0	0	0.714593	1.00652	0	0	0	0	0.623225	0	0	0	0.892358	0	0.643982	0	0.912685	1.04341	0	0	0	0.539166	0.87253	0	0	0	17	0.643563	0.643563
chr12	14105668	14105998	chr12-14105668-DEL-331	chr12	14085001	14110000	0.469658	0.39572	0.777497	0.877235	0.45292	0.716641	0.658889	0.272955	0.602585	0.383236	0.775513	0.463039	0.80511	0.506726	0.565276	0	0.450106	0.598772	0.336137	0.807961	0.322331	0.558811	0.633371	0.558845	0.676062	0	0.427912	2	0.734719	0.734719
chr12	15513089	15513144	chr12-15513089-DEL-56	chr12	15505001	15530000	1.31846	1.91235	2.3141	2.10258	2.321	2.27873	1.78927	1.35416	1.88629	2.11159	1.98112	2.08531	2.01118	2.42945	1.62582	1.92023	2.75709	1.73212	2.13861	1.8559	1.63953	2.71118	2.04341	2.02372	1.75854	2.05119	2.10289	0	0.0941988	0.0941988
chr12	15865734	15868727	chr12-15865734-DEL-2994	chr12	15850001	15875000	0.56157	0	1.14559	1.06081	1.16011	1.14252	1.00378	0	1.00547	1.04302	0	0.999193	0.998042	0.994685	0.790521	0.699771	1.42301	1.09302	1.05298	0.817376	0.944283	1.41678	0	1.38877	1.28274	0.744305	1.11807	4	0.3083	0.3083
chr12	27240947	27240998	chr12-27240947-DEL-52	chr12	27230001	27255000	0.42035	0.459028	0	0.570698	0	0.392596	0.55618	0.580565	0	0.817435	0	0.606371	0	0.999818	0.418487	0.75231	0	0.910296	0	0	0	0.530731	0.960918	0	0	0	0	13	0.17559	0.17559
chr12	27241038	27241153	chr12-27241038-DEL-116	chr12	27230001	27255000	0.42035	0.459028	0	0.570698	0	0.392596	0.55618	0.580565	0	0.817435	0	0.606371	0	0.999818	0.418487	0.75231	0	0.910296	0	0	0	0.530731	0.960918	0	0	0	0	13	0.56045	0.56045
chr12	31116541	31120329	chr12-31116541-DEL-3789	chr12	31105001	31130000	0.255889	0	0	0	0	0	0	1.73307	0	1.55603	0	0	0	1.02887	0	1.17419	1.34422	0	0	0	0.988883	0	1.09551	0	0	1.03102	0	18	0.929236	0.929236
chr12	31122426	31122505	chr12-31122426-DEL-80	chr12	31105001	31130000	0.255889	0	0	0	0	0	0	1.73307	0	1.55603	0	0	0	1.02887	0	1.17419	1.34422	0	0	0	0.988883	0	1.09551	0	0	1.03102	0	18	0.153846	0.153846
chr12	32061588	32061649	chr12-32061588-DEL-62	chr12	32045001	32070000	0.364862	0	0.449613	0.483525	0.444142	0.597209	0.394266	0.213248	0.421611	0.556808	0.475473	0.468347	0.696603	0.443079	0.909518	0.227087	0.309832	0.586493	0.445853	0.662035	0.858096	0.238612	0.767559	0.525723	0.660217	0.203833	0.781091	1	0.75263	0.75263
chr12	47633087	47633136	chr12-47633087-DEL-50	chr12	47625001	47650000	0.424732	0.5926	0.885614	0.833633	0.724179	0.919102	0.713907	0.604837	0.578751	0.708412	0.409713	0.509027	0.693716	0.86238	0.697307	0.91193	0.641893	0.61982	0.957449	1.15012	0.762693	0.717213	0.698267	1.12662	1.1103	1.03503	0.901063	0	0.613969	0.613969
chr12	47634527	47634606	chr12-47634527-DEL-80	chr12	47625001	47650000	0.424732	0.5926	0.885614	0.833633	0.724179	0.919102	0.713907	0.604837	0.578751	0.708412	0.409713	0.509027	0.693716	0.86238	0.697307	0.91193	0.641893	0.61982	0.957449	1.15012	0.762693	0.717213	0.698267	1.12662	1.1103	1.03503	0.901063	0	0.699944	0.699944
chr12	47971791	47971854	chr12-47971791-DEL-64	chr12	47955001	47980000	0.253444	0.913869	0.669491	0.685475	0	0.66105	0.502149	0.466383	0	0	0	0.643072	0	0.823556	0.585635	0.373658	0.378987	0	0	0.531851	0.92055	1.01696	0.639898	0	0	0	0.857486	10	0.976354	0.976354
chr12	51403106	51403157	chr12-51403106-DEL-52	chr12	51385001	51410000	0.442652	1.45902	1.62251	0	0.910707	1.89466	0	0	1.49189	1.62692	0	1.60466	1.70422	1.95045	0	0.839907	0	1.60987	1.74506	1.86143	0	0	1.71189	1.65703	1.49413	1.58349	1.99107	8	0.297233	0.594466
chr12	51403106	51403157	chr12-51403106-DEL-52	chr12	51395001	51420000	0.442652	1.45902	1.62251	0	0.910707	1.89466	0	0	1.49189	1.62692	0	1.60466	1.70422	1.95045	0	0.839907	2.25898	1.60987	1.74506	1.86143	0.764828	1.16875	1.71189	1.65703	1.49413	1.58349	1.99107	5	0.595155	0.595155
chr12	53682403	53682722	chr12-53682403-DEL-320	chr12	53665001	53690000	1.1018	1.98009	1.8888	1.74455	1.61797	2.0517	1.64459	1.6453	1.32308	1.60659	1.99824	1.30042	1.54593	2.13818	1.30747	1.4598	1.10779	1.71256	1.53833	1.7248	1.67476	1.8838	1.57865	1.33881	1.80806	1.32201	1.8663	0	0.94	0.94
chr12	55079515	55081687	chr12-55079515-DEL-2173	chr12	55070001	55095000	0.884659	1.03904	1.20367	0	1.19566	1.19977	1.17806	1.25875	0	1.4741	1.35118	1.14916	0.989894	0	1.36503	0	1.23888	0	1.61577	1.39295	1.19617	1.91544	1.68878	1.46355	1.9003	1.40165	1.90483	5	0.949802	0.949802
chr12	55333426	55334399	chr12-55333426-DEL-974	chr12	55320001	55345000	0.208078	0.174858	0.276041	0	0.353112	0.201335	0	0	0	0	0	0	0	0.231975	0	0	0	0	0	0	0.184298	0.500188	0	0	0	0	0.510633	18	0.412998	0.412998
chr12	55608497	55610460	chr12-55608497-DEL-1964	chr12	55605001	55630000	0.725885	1.93519	1.58418	1.74417	1.39318	1.74865	1.72052	1.66904	1.88978	1.50188	1.46231	1.70633	1.4004	1.98548	2.19512	1.52579	1.66518	1.54208	1.74043	1.76225	1.35769	2.07138	1.58675	1.55715	1.86777	1.75264	1.91904	0	0.705138	0.705138
chr12	57634245	57635467	chr12-57634245-DEL-1223	chr12	57625001	57650000	0.56081	0	0	0	0.740378	0	0	0	0	0	0.801176	0	0.542278	0.630602	0	0	1.01024	0	0	0	0	0.621367	0.230078	0	0.788285	0	0	18	0.216271	0.216271
chr12	58328124	58336612	chr12-58328124-DEL-8489	chr12	58330001	58355000	0.336236	0	0	0.887563	0	0	0	0	0	0.916377	0	0	0.653031	0.862185	0	1.14778	1.05344	0	0.841797	0	0.904562	0	1.14873	0	0	0	0	17	0.263376	0.263376
chr12	68861996	68862737	chr12-68861996-DEL-742	chr12	68840001	68865000	0.952428	1.99178	1.60723	1.84344	1.69524	2.17786	1.73661	1.81655	1.53356	2.33638	1.82919	1.76174	1.66633	1.99708	1.83028	1.46126	1.56693	1.68873	1.80143	1.95763	1.59121	2.67098	1.95514	1.52213	1.50558	1.64427	2.2127	0	0.120365	0.120365
chr12	69282632	69282692	chr12-69282632-DEL-61	chr12	69265001	69290000	0.734712	0	0	0	0.969382	1.24817	1.22782	1.22138	0.984104	1.25115	1.25965	1.09193	0.935493	1.13198	0.942255	0.955845	0.883685	1.2333	0.952226	1.08625	0.862909	1.20834	1.17479	0.755162	1.39172	0	1.1881	4	0.656457	0.656457
chr12	69282632	69282734	chr12-69282632-DEL-103	chr12	69265001	69290000	0.734712	0	0	0	0.969382	1.24817	1.22782	1.22138	0.984104	1.25115	1.25965	1.09193	0.935493	1.13198	0.942255	0.955845	0.883685	1.2333	0.952226	1.08625	0.862909	1.20834	1.17479	0.755162	1.39172	0	1.1881	4	0.607358	0.607358
chr12	69891582	69891637	chr12-69891582-DEL-56	chr12	69870001	69895000	0.569347	0.916146	1.05455	0.419211	1.18851	1.2719	0.849371	0	0.702891	0	0.758125	0.902052	0.79204	1.00186	0.799889	0.869293	0.899446	0.804511	1.10999	1.28058	0.571806	1.45441	1.00906	0	0.706801	0.846968	1.09269	3	0.959358	0.959358
chr12	76612425	76612486	chr12-76612425-DEL-62	chr12	76590001	76615000	0.683997	1.20425	1.54036	1.20408	1.30711	1.17785	0	1.24384	1.60995	1.73338	1.35749	1.51098	1.15413	1.09114	1.2698	1.65338	1.694	1.33278	1.34944	1.12684	1.2259	1.63929	1.12094	0.91894	1.54024	1.19276	1.2016	1	0.196273	0.196273
chr12	77514877	77515199	chr12-77514877-DEL-323	chr12	77515001	77540000	0.204075	0.601448	0.362519	0.747138	0.149673	0.664471	0.729945	0.633438	0.725655	0.760324	0	0.42123	1.14131	0.44164	1.03931	0.596054	0	0.336183	0	0.574389	0	0	0.564916	0.993826	0	0	0	8	0.231155	0.231155
chr12	77982223	77982399	chr12-77982223-DEL-177	chr12	77980001	78005000	0.209992	0.721138	0	0.565319	0	0	0	0	0	0	0	0	0.677368	0	0	0.779601	0	0	0	0	0	0	0	0	0	0	0	22	0.959818	0.959818
chr12	78142678	78142737	chr12-78142678-DEL-60	chr12	78125001	78150000	0.27439	0.357649	0	0	0	0.48915	0.236797	0.496112	0.584718	0.564137	0.60513	0.532402	0.417595	0	0.281536	0.149382	0.738162	0.605488	0	0.396801	0.372583	0.624578	0.419971	0.528462	0.828543	0.563789	0.572554	5	0.374396	0.374396
chr12	80180154	80180313	chr12-80180154-DEL-160	chr12	80180001	80205000	0.399988	0.44549	0.616459	0.602627	0	0.538339	0.77064	0.62496	0	0	0.559813	1.08954	0	0.753278	0	0	0	1.25171	1.16292	0.594797	0.617945	1.81169	0.86402	1.37205	0.805107	0.663092	0.653236	7	0.00770059	0.00770059
chr12	94993232	94993367	chr12-94993232-DEL-136	chr12	94985001	95010000	0.24953	0.608705	0	0	0.651444	0.43721	0.342091	1.04636	0.47156	0.492793	0.287536	0	0.299932	0.433035	0	0.908638	0.467089	0.688292	0.203162	0.200934	0.268097	0.445985	0.221575	0.454821	0.595976	0.376701	0.577498	4	0.219796	0.219796
chr12	96978478	96978793	chr12-96978478-DEL-316	chr12	96975001	97000000	0.414777	0.933229	0.843682	0.710404	1.24726	1.2098	0.768597	1.27131	0.808079	0.897361	0.982058	0.983959	0.812483	0	0.837861	0	0.977795	1.35627	1.0651	0.946602	1.28163	1.30341	1.07711	0.998826	1.23065	0.610045	0.892944	2	0.279225	0.279225
chr12	102868085	102868188	chr12-102868085-DEL-104	chr12	102860001	102885000	0.428293	0.613796	0.65214	0.338988	0.527479	0.317351	0	0.635989	0.338531	0.442823	0.514863	0	0.50483	1.0827	0.849421	0.423973	0	0.425694	0.338672	0.452699	0.590638	0	0.32887	0.632476	0.312438	0	0	6	0.231155	0.231155
chr12	102868089	102868138	chr12-102868089-DEL-50	chr12	102860001	102885000	0.428293	0.613796	0.65214	0.338988	0.527479	0.317351	0	0.635989	0.338531	0.442823	0.514863	0	0.50483	1.0827	0.849421	0.423973	0	0.425694	0.338672	0.452699	0.590638	0	0.32887	0.632476	0.312438	0	0	6	0.263376	0.263376
chr12	106224913	106225008	chr12-106224913-DEL-96	chr12	106200001	106225000	0.878195	1.53577	1.64857	1.50502	1.59595	1.77736	1.68222	1.42645	1.30509	1.30062	1.84572	1.68072	0	1.98711	1.7748	1.70372	1.96896	1.61962	1.24338	2.18148	0	1.47111	1.63213	1.71768	1.69338	1.50026	1.70202	2	0.532737	0.532737
chr12	110507469	110507518	chr12-110507469-DEL-50	chr12	110490001	110515000	0.485215	0	1.16525	0	0	0	0	0	0	0	0.805949	0	0	0	0	0	0	1.06511	0	0	0	0	0	0	0	0	0.926622	22	0.923077	0.923077
chr12	114635232	114635324	chr12-114635232-DEL-93	chr12	114615001	114640000	0.361162	0.634718	0	0.522172	0	0	0	0.820822	0	0	0	0	0.615243	0.588612	0.675672	0	0	0	0	0	0	0	0	0.285902	0	0	0.451546	18	0.283077	0.283077
chr12	114640427	114640492	chr12-114640427-DEL-66	chr12	114640001	114665000	0.361162	0	0.588545	0	0.615156	0.681034	0.264845	0	0.71966	0.703174	0.538234	0.595373	0	0	0	0.589093	0.807869	0.640912	0.746886	0.523766	0.266	0.857712	0.543958	0	0.657127	0.401763	0	8	0.51694	0.51694
chr12	117203138	117205718	chr12-117203138-DEL-2581	chr12	117190001	117215000	0.559826	0.989444	0.926746	0.944841	1.01453	0.97507	0.800491	1.00963	0.959034	0.882703	0.941639	0.975735	0.978893	0	1.06985	0.738471	1.21287	1.33145	1.34081	0.704339	1.17325	1.43387	0.947625	1.0779	0.75849	0.643694	0.836011	1	0.610845	0.610845
chr12	118009280	118010696	chr12-118009280-DEL-1417	chr12	118000001	118025000	0.28893	0.57743	0.422343	0.419533	0.606897	0.36503	0.551233	0.658151	0.601959	0.133427	0.478391	0.534628	0.760431	0.925061	0.857654	0.471901	0.669773	0	0.452117	0	0.500716	0.52997	0.466477	0.435664	0	0.468224	0.604375	3	0.0773991	0.0773991
chr12	119547491	119547550	chr12-119547491-DEL-60	chr12	119535001	119560000	0.218145	0.719697	0	0	0	0.555915	0	0.532262	0.57072	0.861492	0.320292	0	0.510961	0.701456	0.775601	0.978179	0.606571	0.459918	0	0	0.341741	0.851208	0	1.18975	0.626437	0.347328	0.622672	8	0.172441	0.172441
chr12	119657130	119657232	chr12-119657130-DEL-103	chr12	119645001	119670000	0.711997	1.51713	1.68222	1.19927	1.40471	1.24806	1.2219	1.50643	1.38713	1.8308	1.26516	1.33457	1.61825	1.27654	1.577	1.55536	1.65204	1.34867	1.61702	1.31609	1.35913	2.21451	1.31256	1.3255	1.60828	1.29217	1.43069	0	0.559866	0.559866
chr12	119918429	119918651	chr12-119918429-DEL-223	chr12	119895001	119920000	0.184762	0.454111	0.586856	0.52929	0.570698	0.398552	0	0.367215	0	0	0.260901	0.403909	0.352461	0.329948	0	0	0.233233	0.365969	0.202716	0	0.589506	0.484399	0	0.89326	0	0.50347	0.764424	8	0.260831	0.260831
chr12	120988010	120988072	chr12-120988010-DEL-63	chr12	120970001	120995000	0.534358	0.649276	1.21329	1.07164	0.978969	1.19827	1.15829	1.42998	0.539257	0.66749	1.16308	1.27966	0	1.27398	0	0	1.07604	1.2929	1.06246	1.09088	1.20397	0.871	0.991481	1.22929	1.22867	0.807929	1.26059	3	0.0302508	0.0302508
chr12	122124332	122124414	chr12-122124332-DEL-83	chr12	122115001	122140000	1.08228	1.26626	1.52543	1.46569	1.32914	1.56617	1.31231	1.51337	1.4249	1.33046	1.44528	1.20825	1.15831	1.54918	1.54442	0.985901	1.24504	1.69404	1.36675	1.47682	1.42816	1.88702	1.56692	1.30854	1.50651	1.10445	1.4821	0	0.344615	0.344615
chr12	124311271	124311390	chr12-124311271-DEL-120	chr12	124310001	124335000	0.283796	0.612544	0.728651	0	0.65163	0.739547	0.716159	0.57563	0.768104	0.815232	1.44942	0.879675	1.0766	0.936628	0.899179	0.546214	0.648937	0.971768	0	0.780479	0	0	0.91808	0.820833	0.675654	0.553013	0.436946	4	0.338342	0.338342
chr12	124323338	124323438	chr12-124323338-DEL-101	chr12	124310001	124335000	0.283796	0.612544	0.728651	0	0.65163	0.739547	0.716159	0.57563	0.768104	0.815232	1.44942	0.879675	1.0766	0.936628	0.899179	0.546214	0.648937	0.971768	0	0.780479	0	0	0.91808	0.820833	0.675654	0.553013	0.436946	4	0.832626	0.832626
chr12	125409679	125409843	chr12-125409679-DEL-165	chr12	125395001	125420000	0.460553	0	0.393031	0	0	0.440391	1.05601	0.721217	0	0	0.705869	0.499668	0.903655	0.613893	0	0	0	1.09333	0	0	0	0.625412	0.642347	1.134	0.710811	0.452944	0.479069	11	1	1
chr12	125534651	125534706	chr12-125534651-DEL-56	chr12	125525001	125550000	0.220215	0.664984	0.515433	0	0.350444	0	0.24172	0.67992	0.159512	0	0.296166	0.334941	0.3739	0.355618	0	0	0.7377	0.454172	0.132135	0.308214	0.328953	0.75943	0.605464	0.746112	0.466617	0	0.421835	6	0.412998	0.412998
chr12	126728420	126728583	chr12-126728420-DEL-164	chr12	126720001	126745000	0.208065	0.312741	0	0.17609	0.543794	0.341042	0.384507	0.660191	0.22145	0	0	0	0	0	0	0	0	0.210789	0	0	0.278579	0	0	0.206466	0	0	0.39745	15	0.615385	0.615385
chr12	127018080	127018307	chr12-127018080-DEL-228	chr12	127010001	127035000	0.215934	0	0.714804	0.512084	0	0.587578	0.855214	0.89368	0.42565	0.716717	0	0.54959	0.345097	0	0	0.219845	0	0.598187	0.566202	0.438325	0.490834	0.483222	0	0	0.775841	0.591233	0.566437	8	0.305054	0.305054
chr12	127123665	127123735	chr12-127123665-DEL-71	chr12	127100001	127125000	0.221252	0	0	0	0	0	0.387808	0	0.282246	0	0	0	0	0	0	0	0	0	0.200704	0	0.613265	0.377758	0	0	0	0	0	21	0.821365	0.821365
chr12	128844846	128845117	chr12-128844846-DEL-272	chr12	128840001	128865000	0.223458	0.820739	0.289674	0.728548	0.406066	0.307652	0.407275	0.426386	0.595324	0.471303	0.241606	0.337142	0.647997	0.438259	0.357778	0	0.779117	0.301996	0	0.441586	0.83762	0	0	0	0	0.31012	0	7	0.899787	0.899787
chr12	128845766	128846038	chr12-128845766-DEL-273	chr12	128840001	128865000	0.223458	0.820739	0.289674	0.728548	0.406066	0.307652	0.407275	0.426386	0.595324	0.471303	0.241606	0.337142	0.647997	0.438259	0.357778	0	0.779117	0.301996	0	0.441586	0.83762	0	0	0	0	0.31012	0	7	0.65868	0.65868
chr12	128846675	128846833	chr12-128846675-DEL-159	chr12	128840001	128865000	0.223458	0.820739	0.289674	0.728548	0.406066	0.307652	0.407275	0.426386	0.595324	0.471303	0.241606	0.337142	0.647997	0.438259	0.357778	0	0.779117	0.301996	0	0.441586	0.83762	0	0	0	0	0.31012	0	7	0.630785	0.630785
chr12	128971680	128971736	chr12-128971680-DEL-57	chr12	128970001	128995000	0.216853	0.669015	0.46421	0	0.466767	0.764183	0	0.468876	0	0.497905	0.585021	0	0.265052	0.423323	0	0.547542	0.437532	0.759682	0.598368	0.464181	0	0	0.522345	0	1.00473	0.486364	0.92994	8	0.163875	0.163875
chr12	130353246	130353322	chr12-130353246-DEL-77	chr12	130345001	130370000	0.182689	0	0.42471	0.246777	0.169992	0.383222	0	0.21392	0.264882	0	0.357155	0	0	0	0	0.418575	0.659676	0	0.408831	0	0	0	0	0.366691	0.490956	0.58737	0.586566	12	0.918817	0.918817
chr12	130758644	130759038	chr12-130758644-DEL-395	chr12	130735001	130760000	0.597829	0.856524	1.11876	0.775631	1.39771	0.972529	1.12228	1.04105	0.491255	1.48602	0.709227	1.03457	0.91138	1.01138	0.771236	0.605577	0.945713	0.974107	0.784689	0.852467	0.679676	1.26637	1.24559	1.71965	1.17088	0.87267	1.41004	0	0.63402	0.63402
chr12	130759147	130759325	chr12-130759147-DEL-179	chr12	130735001	130760000	0.597829	0.856524	1.11876	0.775631	1.39771	0.972529	1.12228	1.04105	0.491255	1.48602	0.709227	1.03457	0.91138	1.01138	0.771236	0.605577	0.945713	0.974107	0.784689	0.852467	0.679676	1.26637	1.24559	1.71965	1.17088	0.87267	1.41004	0	0.560362	0.560362
chr12	130882217	130882756	chr12-130882217-DEL-540	chr12	130870001	130895000	0.593807	0.935383	0.593827	0.738283	0.940625	0.596557	0.850879	1.10538	0.577313	0.957284	0.744819	1.00249	0.840965	0.928153	0.58801	0	0.959604	1.27664	0.866913	1.02214	0.786054	1.12144	0.75194	0.901539	0.902429	0.830233	1.1429	1	0.412998	0.412998
chr12	130887425	130887586	chr12-130887425-DEL-162	chr12	130870001	130895000	0.593807	0.935383	0.593827	0.738283	0.940625	0.596557	0.850879	1.10538	0.577313	0.957284	0.744819	1.00249	0.840965	0.928153	0.58801	0	0.959604	1.27664	0.866913	1.02214	0.786054	1.12144	0.75194	0.901539	0.902429	0.830233	1.1429	1	0.744473	0.744473
chr12	130887425	130887478	chr12-130887425-DEL-54	chr12	130870001	130895000	0.593807	0.935383	0.593827	0.738283	0.940625	0.596557	0.850879	1.10538	0.577313	0.957284	0.744819	1.00249	0.840965	0.928153	0.58801	0	0.959604	1.27664	0.866913	1.02214	0.786054	1.12144	0.75194	0.901539	0.902429	0.830233	1.1429	1	0.764841	0.764841
chr12	131127825	131128000	chr12-131127825-DEL-176	chr12	131125001	131150000	0.26729	0.443607	1.01574	0.555982	0	0.688675	0.614378	0	0.646967	0.53174	0.492653	0.541672	0.536171	0.372069	0.707796	0.422879	0.574377	0.699862	0.64019	0.78017	0	0.286964	0.436627	0.471045	0.420394	0.359381	0.461406	3	0.659889	0.659889
chr12	131128972	131129062	chr12-131128972-DEL-91	chr12	131125001	131150000	0.26729	0.443607	1.01574	0.555982	0	0.688675	0.614378	0	0.646967	0.53174	0.492653	0.541672	0.536171	0.372069	0.707796	0.422879	0.574377	0.699862	0.64019	0.78017	0	0.286964	0.436627	0.471045	0.420394	0.359381	0.461406	3	0.538462	0.538462
chr12	131306036	131306248	chr12-131306036-DEL-213	chr12	131295001	131320000	0.23393	0.488176	0	0	0.34947	0.426296	0.892572	0	0.80429	0	0	0	0	0	0	0	1.34164	0.651432	0.333077	0.511236	0.499254	0.391496	0	0.778086	0.710871	0	0.619105	12	0.571429	0.571429
chr12	131306770	131306821	chr12-131306770-DEL-52	chr12	131295001	131320000	0.23393	0.488176	0	0	0.34947	0.426296	0.892572	0	0.80429	0	0	0	0	0	0	0	1.34164	0.651432	0.333077	0.511236	0.499254	0.391496	0	0.778086	0.710871	0	0.619105	12	0.571429	0.571429
chr12	131701102	131701577	chr12-131701102-DEL-476	chr12	131685001	131710000	0.492324	0.986786	0.775579	0.864335	0.417643	0.962108	0	0.967651	1.03414	0.552815	0.542144	0.839534	0	0.426127	0	0.848938	0.72288	1.02278	0.476735	0.859666	0.546888	0.953875	0.717173	0.92066	0.659685	1.0075	0.292852	3	0.856355	0.856355
chr12	131701177	131701400	chr12-131701177-DEL-224	chr12	131685001	131710000	0.492324	0.986786	0.775579	0.864335	0.417643	0.962108	0	0.967651	1.03414	0.552815	0.542144	0.839534	0	0.426127	0	0.848938	0.72288	1.02278	0.476735	0.859666	0.546888	0.953875	0.717173	0.92066	0.659685	1.0075	0.292852	3	0.683217	0.683217
chr12	132148963	132150101	chr12-132148963-DEL-1139	chr12	132140001	132165000	0.691835	1.04083	1.33837	1.16743	1.36254	1.02379	1.07828	0.737662	1.04746	1.24727	0.964203	1.30823	0	1.355	0.995411	0.802711	0	1.14682	0.986638	1.08692	0.786402	1.01389	0.793175	1.02304	1.22471	0.534617	0.985193	2	0.121434	0.121434
chr12	132149662	132150052	chr12-132149662-DEL-391	chr12	132140001	132165000	0.691835	1.04083	1.33837	1.16743	1.36254	1.02379	1.07828	0.737662	1.04746	1.24727	0.964203	1.30823	0	1.355	0.995411	0.802711	0	1.14682	0.986638	1.08692	0.786402	1.01389	0.793175	1.02304	1.22471	0.534617	0.985193	2	0.297233	0.297233
chr12	132412304	132412646	chr12-132412304-DEL-343	chr12	132395001	132420000	0.74561	1.61118	1.2884	2.03287	1.55928	2.0596	1.81211	1.54091	1.35007	1.71693	1.83947	1.70878	1.46985	1.3907	1.38823	1.02355	2.29075	1.696	1.79702	1.65398	1.80415	2.68669	1.74519	1.39085	1.88471	1.79788	2.20999	0	0.764841	0.764841
chr12	132412775	132413159	chr12-132412775-DEL-385	chr12	132395001	132420000	0.74561	1.61118	1.2884	2.03287	1.55928	2.0596	1.81211	1.54091	1.35007	1.71693	1.83947	1.70878	1.46985	1.3907	1.38823	1.02355	2.29075	1.696	1.79702	1.65398	1.80415	2.68669	1.74519	1.39085	1.88471	1.79788	2.20999	0	1	1
chr12	132413305	132413598	chr12-132413305-DEL-294	chr12	132395001	132420000	0.74561	1.61118	1.2884	2.03287	1.55928	2.0596	1.81211	1.54091	1.35007	1.71693	1.83947	1.70878	1.46985	1.3907	1.38823	1.02355	2.29075	1.696	1.79702	1.65398	1.80415	2.68669	1.74519	1.39085	1.88471	1.79788	2.20999	0	0.0769231	0.0769231
chr12	132587910	132587998	chr12-132587910-DEL-89	chr12	132585001	132610000	0.240781	0.595366	0	0.671814	0.574343	0	0	0.6285	0	0	0	0	0	0	0.527438	0.493463	0	0	0	0	0	0	0.406765	0.865742	0.436472	0	0.387407	16	0.0972623	0.0972623
chr12	132602032	132602099	chr12-132602032-DEL-68	chr12	132585001	132610000	0.240781	0.595366	0	0.671814	0.574343	0	0	0.6285	0	0	0	0	0	0	0.527438	0.493463	0	0	0	0	0	0	0.406765	0.865742	0.436472	0	0.387407	16	0.596695	0.596695
chr12	132758949	132759210	chr12-132758949-DEL-262	chr12	132745001	132770000	0.310609	0.346812	0.199066	0	0	0	0	0.485668	0.264885	0	0.22561	0	0	0.711476	0.783221	0	0.454123	0.274161	0	0.403085	0.640968	0	0.214357	0.324526	0	0	0.417551	12	0.219926	0.219926
chr12	132759119	132759205	chr12-132759119-DEL-87	chr12	132745001	132770000	0.310609	0.346812	0.199066	0	0	0	0	0.485668	0.264885	0	0.22561	0	0	0.711476	0.783221	0	0.454123	0.274161	0	0.403085	0.640968	0	0.214357	0.324526	0	0	0.417551	12	0.393846	0.393846
chr12	132895354	132896887	chr12-132895354-DEL-1534	chr12	132875001	132900000	1.01536	1.36971	1.75479	1.92284	1.49415	1.29092	1.47864	1.58848	1.38604	1.87085	1.70756	1.00459	1.51383	1.63066	1.90161	1.44144	1.34159	0.644656	1.45142	0.995919	1.00697	0	1.10212	0.685556	1.18707	1.44749	1.19556	1	0.138957	0.138957
chr12	132895536	132895939	chr12-132895536-DEL-404	chr12	132875001	132900000	1.01536	1.36971	1.75479	1.92284	1.49415	1.29092	1.47864	1.58848	1.38604	1.87085	1.70756	1.00459	1.51383	1.63066	1.90161	1.44144	1.34159	0.644656	1.45142	0.995919	1.00697	0	1.10212	0.685556	1.18707	1.44749	1.19556	1	0.180439	0.180439
chr13	19768377	19769284	chr13-19768377-DEL-908	chr13	19765001	19790000	0.302151	0.505045	0.35907	0.137681	0.753856	0.504207	0.593294	0.556596	0.198655	0.581569	0.400526	0.301536	0.425001	0.758141	0	0.350153	0.157698	0.323301	0.265735	0.41136	0.477583	0	0	0	0.318761	0.619944	0.569118	4	0.105351	0.105351
chr13	20497406	20497456	chr13-20497406-DEL-51	chr13	20480001	20505000	0.809678	1.47125	1.33	1.67178	2.19129	1.94902	1.61986	1.56161	1.36165	1.5378	1.11675	1.29388	1.48582	1.54262	1.51498	1.37149	1.67665	1.28205	1.9263	1.57725	1.4949	2.24723	1.30357	1.71991	1.90585	1.37377	1.46021	0	0.2	0.2
chr13	21186364	21186510	chr13-21186364-DEL-147	chr13	21170001	21195000	0.550735	0.377679	0.413454	0.792707	0.69257	0.550978	0.456526	0.311892	0	0.67777	0.627957	0.705747	0.71077	0.559321	0.924816	0.330183	0.946108	0.792972	0.48807	0.536978	0.498445	0.543267	0.677577	0	0.855813	0.464169	0.664028	2	0.82009	0.82009
chr13	21290449	21290508	chr13-21290449-DEL-60	chr13	21280001	21305000	0.638926	1.18988	0.996084	1.30539	1.29596	1.14975	1.06531	1.01286	0.871108	1.55347	1.35064	0.888733	1.13401	1.1949	1.75058	1.0359	1.34805	1.04766	1.16806	1.42518	0.953803	1.60998	0.836803	1.42717	1.14953	0.827661	0.928328	0	0.705138	0.705138
chr13	24735354	24735725	chr13-24735354-DEL-372	chr13	24730001	24755000	0.574439	0.765963	1.42449	0.808859	0.922322	1.02514	0.479656	0.672615	0.645812	1.0582	1.15148	0.807053	0.715898	1.07177	0.678851	0.920842	0.662573	0.980941	0.904597	0.870399	0.57722	1.08023	0.751143	0	1.02801	0.559034	1.2579	1	0.586471	0.586471
chr13	25371384	25371435	chr13-25371384-DEL-52	chr13	25360001	25385000	0.358764	0.853675	0.36726	0.892796	1.08036	0.793402	0.473524	0.875921	0.73192	1.01215	0.6887	0.765461	0.609085	1.145	0.675592	0.894136	1.04847	0.668544	0.919034	0.387076	0.721536	0.930626	0.537235	0.771586	0.824816	0.555246	0.8205	0	0.00131219	0.00131219
chr13	27051819	27051886	chr13-27051819-DEL-68	chr13	27050001	27075000	0.239528	0.647359	0.30905	0.581916	0	0.542952	0.58074	0	0.629655	0.612851	0	0	0.543111	0.451335	0.774492	0	0.730866	0.43364	0.495439	0	0	0.672728	0.580942	0.601528	0.319476	0	0.737474	8	0.801034	0.801034
chr13	27991192	27991287	chr13-27991192-DEL-96	chr13	27980001	28005000	0.937142	1.70264	2.15673	2.14547	2.20796	1.91698	1.86212	1.65225	1.66348	1.94377	2.23904	1.52146	1.54364	1.60803	2.03214	1.90393	2.1913	1.46957	2.29006	1.45437	2.01666	1.9274	1.64545	1.51291	1.84729	1.90992	2.2245	0	0.498462	0.498462
chr13	29375516	29375615	chr13-29375516-DEL-100	chr13	29355001	29380000	0.289347	0.663907	0.399547	0	0.627875	0.534084	0.502334	0.489534	0	0.294075	0.616337	0.602343	0.419053	0	0	0.92663	0.451734	0.303827	0	0	1.09434	0.814359	0	0.689234	0	0	0	10	1	1
chr13	30469465	30469687	chr13-30469465-DEL-223	chr13	30455001	30480000	1.17513	2.12363	1.95229	2.27107	1.9064	2.21969	2.06117	2.23027	2.17846	2.64118	2.268	2.03919	1.76556	2.15153	2.46747	2.3245	2.05707	1.78635	1.92029	2.23484	1.93807	2.09123	1.31046	2.3708	1.85109	1.98014	1.90302	0	0.285675	0.285675
chr13	30601449	30601783	chr13-30601449-DEL-335	chr13	30600001	30625000	0.565093	0	0	0	0	0	0.913936	0	0	0	0	0.659422	0	0	0	1.05807	0.914719	0	0	0	0	0	0	0.607957	0	0	0	21	0.338814	0.338814
chr13	33816172	33816524	chr13-33816172-DEL-353	chr13	33810001	33835000	0.318326	0	0	0	0	0.700652	0.547337	0.805384	0	0	0	0	0.844796	0	0	0	0	0.559296	0	0	0	0.899046	0	0.591118	0	0	0	19	0.2	0.2
chr13	42965659	42967311	chr13-42965659-DEL-1653	chr13	42955001	42980000	0.902452	1.41211	1.76964	1.72317	1.85647	1.89077	1.89697	1.98027	1.68338	1.73711	1.90911	1.40515	1.31137	2.16945	1.49186	1.76331	1.75336	1.66158	1.56643	1.65839	1.22547	1.52207	1.43032	2.03925	1.88939	1.31082	1.35949	0	0.470635	0.470635
chr13	43806171	43806515	chr13-43806171-DEL-345	chr13	43790001	43815000	0.28616	0.718256	0.5454	0.691269	1.1028	0.738273	0	0.642975	0	0	0.554946	0.423373	0	0.664644	0	0	0	0.472937	0.620963	0.96656	0	0.982491	0.827808	0.653073	0.71441	0.66515	0.71282	8	0.251953	0.251953
chr13	44468297	44468969	chr13-44468297-DEL-673	chr13	44460001	44485000	0.896041	1.4874	1.60406	1.19671	2.05608	1.53264	0	1.36554	1.27233	1.38049	1.4344	1.89696	1.59955	1.46282	1.58563	1.47027	1.90004	1.59899	1.83268	1.81696	1.1854	2.44599	1.83379	1.55223	1.95517	1.74528	1.5585	1	0.899787	0.899787
chr13	45105127	45105180	chr13-45105127-DEL-54	chr13	45105001	45130000	0.319919	0.396281	0.216474	0	0.295389	0.427966	0.622102	0.229116	0	0.285369	0.44659	0.446822	0.222641	0.736602	0.62879	0	0	0.358591	0.516015	0.220224	0.290313	0.535163	0.225777	0.327949	0.283178	0.196205	0.37015	4	0.486136	0.486136
chr13	45513223	45513374	chr13-45513223-DEL-152	chr13	45510001	45535000	0.529771	0.831388	0.980432	0.629058	0.789453	0.747302	0	0.739354	0.862086	0.95026	0.937819	0	0.859917	0	0	0.683012	0	0	0.744952	0.808692	0.813091	0	0.65085	0.793465	1.15498	0.855856	1.01159	7	0.0672657	0.0672657
chr13	46332753	46332901	chr13-46332753-DEL-149	chr13	46310001	46335000	0.411171	0.655174	1.05692	0.987454	0.853755	0	0.627343	0	0.452123	0.902236	1.03114	0.966639	0.543198	0.825355	0	0.724946	0.819804	0.929082	0.750705	0.645157	0.827229	1.17397	0.538085	0.224368	1.1429	0.906937	0.628636	3	0.571611	0.571611
chr13	79183271	79183326	chr13-79183271-DEL-56	chr13	79160001	79185000	0.266148	0	0	0.46409	0	0.492123	0	0.461485	0	0.49871	0.435719	0.18039	0	0	0	0.769199	0	0.386075	0	0	0	0.354884	0.124768	0.424591	0.285353	0	0	14	0.656457	0.656457
chr13	79419092	79419160	chr13-79419092-DEL-69	chr13	79395001	79420000	0.988321	1.94678	1.83537	1.69976	1.97246	1.99625	1.68946	1.61719	1.83117	1.67526	1.80425	1.52791	1.69596	1.87522	1.57989	2.12658	1.90457	1.94028	1.84532	1.9215	1.72143	2.23092	1.53915	2.2482	1.73672	1.53873	2.02767	0	0.2	0.2
chr13	81173102	81173429	chr13-81173102-DEL-328	chr13	81160001	81185000	0.182082	0.234686	0	0	0	0	0	0	0.50019	0.750437	0	0	0	0	0	0	0	0.255816	0.624136	0.613571	0.205324	0	0.402203	0.804505	0	0	0.203196	16	0.676923	0.676923
chr13	81173102	81173429	chr13-81173102-DEL-328	chr13	81165001	81190000	0.182082	0.234686	0	0	0	0	0	0	0.50019	0.750437	0	0	0	0	0	0	0	0.255816	0.624136	0.613571	0.205324	0	0.402203	0.804505	0	0	0.203196	16	0.676923	0.676923
chr13	104768369	104768506	chr13-104768369-DEL-138	chr13	104745001	104770000	0.181425	0.209118	0.441602	0	0.317047	0.268739	0.155432	0	0	0.523649	0.258655	0.545001	0	0.217752	0	0.502523	0.402425	0.541135	0	0.336633	0.220334	1.04963	0.457021	0.223934	0.578426	0	0	8	0.89189	0.89189
chr13	106570518	106570613	chr13-106570518-DEL-96	chr13	106555001	106580000	0.188352	0	0	0.349618	0	0	0	0.410779	0.585815	0.642355	0	0	0	0	0.222412	0.449547	0	0	0	0	0.674857	0	0	0	0	0	0	19	0.506549	0.506549
chr13	110813540	110813611	chr13-110813540-DEL-72	chr13	110810001	110835000	0.293087	0	0	0.490589	0	0.664446	0	0	0	0	0.637265	0	0.358566	0.371557	0	0	0	0.402471	0	0.508338	0.577632	0.672773	0.559108	0.562842	0	0	0	15	0.775995	0.775995
chr13	110827163	110827261	chr13-110827163-DEL-99	chr13	110810001	110835000	0.293087	0	0	0.490589	0	0.664446	0	0	0	0	0.637265	0	0.358566	0.371557	0	0	0	0.402471	0	0.508338	0.577632	0.672773	0.559108	0.562842	0	0	0	15	0.643563	0.643563
chr13	111044882	111045007	chr13-111044882-DEL-126	chr13	111045001	111070000	0.669568	0.943744	1.03454	1.15056	1.273	1.1433	1.06538	1.20534	1.00373	1.00204	1.09767	0.864148	0.755683	1.02132	0.882181	0.817472	1.44185	1.43118	1.00628	1.12475	0.844126	1.8526	1.28319	1.5098	1.56653	0.935228	1.54297	0	0.769231	0.769231
chr13	111052147	111052548	chr13-111052147-DEL-402	chr13	111045001	111070000	0.669568	0.943744	1.03454	1.15056	1.273	1.1433	1.06538	1.20534	1.00373	1.00204	1.09767	0.864148	0.755683	1.02132	0.882181	0.817472	1.44185	1.43118	1.00628	1.12475	0.844126	1.8526	1.28319	1.5098	1.56653	0.935228	1.54297	0	0.0131434	0.0131434
chr13	111052297	111052350	chr13-111052297-DEL-54	chr13	111045001	111070000	0.669568	0.943744	1.03454	1.15056	1.273	1.1433	1.06538	1.20534	1.00373	1.00204	1.09767	0.864148	0.755683	1.02132	0.882181	0.817472	1.44185	1.43118	1.00628	1.12475	0.844126	1.8526	1.28319	1.5098	1.56653	0.935228	1.54297	0	0.305054	0.305054
chr13	111221206	111221341	chr13-111221206-DEL-136	chr13	111220001	111245000	0.593261	1.14889	1.17787	1.39258	1.19233	1.41397	1.23555	0.988322	1.04789	1.25251	1.24688	0.828259	1.19482	1.3696	1.48249	1.19282	1.30279	1.09412	1.10081	1.28297	1.21059	1.13749	0.849289	1.1497	1.251	1.0555	1.32817	0	0.384162	0.384162
chr13	111326261	111326348	chr13-111326261-DEL-88	chr13	111305001	111330000	0.252292	0.416365	0.312787	0	0.455638	0.391315	0.31131	0.316801	0.12962	0.613039	0	0.59889	0	0.532985	0.833312	0.523678	0.456201	0.446857	0.222627	0	0	0.497936	0	0.51473	0.38306	0	0.269394	7	0.615385	0.615385
chr13	111326261	111326348	chr13-111326261-DEL-88	chr13	111320001	111345000	0.252292	0.416365	0.312787	0.390636	0	0	0.31131	0	0.12962	0.613039	0	0.59889	0	0.532985	0.833312	0.523678	0.456201	0	0	0.215603	0	0.497936	0.158932	0.51473	0.38306	0.331498	0	9	0.615385	0.615385
chr13	111473637	111473706	chr13-111473637-DEL-70	chr13	111465001	111490000	0.197875	0.525393	0.280264	0	0.496392	0	0.500249	0	0	0	0.441084	0.59308	0	0	0	0.64687	0.616011	0	0.360636	0	0.373085	0.636022	0.757551	0.23538	0.26841	0.432281	0.676663	10	0.0582004	0.0582004
chr13	112036989	112037095	chr13-112036989-DEL-107	chr13	112025001	112050000	0.248368	0.567778	0.673167	0.275153	0.264039	0.518411	0.296789	0.155417	0.686567	0.48623	0.304371	0	0	0.250829	0.528588	0.252736	0	0.269155	0.630495	0.288776	0.43052	0.669518	0.365587	0	0.527168	0.231343	0.295237	4	0.0476224	0.0476224
chr13	112290531	112304060	chr13-112290531-DEL-13530	chr13	112295001	112320000	0.412061	0.649475	0	0	0	0.48425	0.878824	0	1.3767	0	0	0	0	0	0	0	1.78762	0.449869	1.00215	0	0	0	0	1.13856	0	0	0	18	0.683217	0.683217
chr13	112449861	112449961	chr13-112449861-DEL-101	chr13	112435001	112460000	0.453381	0.828616	0.969866	0	1.03866	1.13518	1.05794	1.05915	1.13845	1.53644	1.12444	0.962663	1.18878	0.600453	1.29246	0.883653	1.05797	0.700689	0.983257	0.663993	0.814042	1.15389	0.941368	0	1.10458	1.00472	0.909444	2	0.494013	0.494013
chr13	112884736	112884794	chr13-112884736-DEL-59	chr13	112875001	112900000	0.602632	1.00906	1.56576	1.25648	1.34457	1.07923	1.23646	0	1.39862	1.28201	0.815284	1.06763	0.959961	1.13918	0	1.76712	1.28554	1.22879	1.12444	1.29814	1.20528	1.5338	1.24853	1.26957	1.47879	1.69911	1.39481	2	0.649848	0.649848
chr13	112894893	112894957	chr13-112894893-DEL-65	chr13	112875001	112900000	0.602632	1.00906	1.56576	1.25648	1.34457	1.07923	1.23646	0	1.39862	1.28201	0.815284	1.06763	0.959961	1.13918	0	1.76712	1.28554	1.22879	1.12444	1.29814	1.20528	1.5338	1.24853	1.26957	1.47879	1.69911	1.39481	2	0.180439	0.180439
chr13	113151455	113151549	chr13-113151455-DEL-95	chr13	113135001	113160000	0.497969	1.25513	1.38265	0.430444	0.792849	0.9763	1.223	1.14732	0.771137	0.661244	0.819924	1.83932	1.00817	1.21984	1.14604	1.21704	1.58601	0.915446	0.910757	0.94518	1.30675	0.602833	0	0.692387	0.661601	0.750241	1.17489	1	0.461357	0.461357
chr13	113215751	113215837	chr13-113215751-DEL-87	chr13	113200001	113225000	0.198931	0	0	0	0	0	0	0.0478797	0.422122	0	0.2561	0.27681	0	0.0666766	0	0.819273	0	0.207868	0	0.354505	0	0	0.509979	0	0.31087	0.213727	0.226763	14	0.667254	0.667254
chr13	113940487	113941057	chr13-113940487-DEL-571	chr13	113930001	113955000	0.337157	0.70242	1.04245	0.865907	0	0.879116	0.783443	1.28175	0.817723	0.816391	1.12045	0.8495	0	0.585596	0.597471	0.454553	0.838099	0.938358	0.878322	0.430996	0	1.08342	0.709116	0.711551	0.984858	0.743464	1.016	3	0.149647	0.149647
chr13	114028872	114029186	chr13-114028872-DEL-315	chr13	114010001	114035000	0.190733	0.385068	0.389927	0	0	0	0	0.284451	0	0	0.480058	0.272694	0.443484	0	1.03879	0.961294	0.801637	0.663342	0.756796	0.179356	1.37008	0	0	0	0.707464	0	0	12	0.692308	0.692308
chr13	114029090	114029186	chr13-114029090-DEL-97	chr13	114010001	114035000	0.190733	0.385068	0.389927	0	0	0	0	0.284451	0	0	0.480058	0.272694	0.443484	0	1.03879	0.961294	0.801637	0.663342	0.756796	0.179356	1.37008	0	0	0	0.707464	0	0	12	1	1
chr13	114030383	114030472	chr13-114030383-DEL-90	chr13	114010001	114035000	0.190733	0.385068	0.389927	0	0	0	0	0.284451	0	0	0.480058	0.272694	0.443484	0	1.03879	0.961294	0.801637	0.663342	0.756796	0.179356	1.37008	0	0	0	0.707464	0	0	12	0.63402	0.63402
chr13	114119875	114120118	chr13-114119875-DEL-244	chr13	114120001	114145000	0.620503	1.02609	1.00979	0.768503	1.27275	1.38704	1.34143	0.770464	0.916241	1.01771	0.586376	1.1367	1.04945	1.4373	1.18447	0.565623	1.49267	1.00282	1.18039	0.959833	1.16987	1.40009	0.902244	0.779284	1.60605	0.607556	1.47654	0	0.490953	0.490953
chr13	114119929	114120034	chr13-114119929-DEL-106	chr13	114120001	114145000	0.620503	1.02609	1.00979	0.768503	1.27275	1.38704	1.34143	0.770464	0.916241	1.01771	0.586376	1.1367	1.04945	1.4373	1.18447	0.565623	1.49267	1.00282	1.18039	0.959833	1.16987	1.40009	0.902244	0.779284	1.60605	0.607556	1.47654	0	0.479323	0.479323
chr13	114120138	114120598	chr13-114120138-DEL-461	chr13	114120001	114145000	0.620503	1.02609	1.00979	0.768503	1.27275	1.38704	1.34143	0.770464	0.916241	1.01771	0.586376	1.1367	1.04945	1.4373	1.18447	0.565623	1.49267	1.00282	1.18039	0.959833	1.16987	1.40009	0.902244	0.779284	1.60605	0.607556	1.47654	0	0.711336	0.711336
chr13	114138866	114138925	chr13-114138866-DEL-60	chr13	114120001	114145000	0.620503	1.02609	1.00979	0.768503	1.27275	1.38704	1.34143	0.770464	0.916241	1.01771	0.586376	1.1367	1.04945	1.4373	1.18447	0.565623	1.49267	1.00282	1.18039	0.959833	1.16987	1.40009	0.902244	0.779284	1.60605	0.607556	1.47654	0	0.525094	0.525094
chr13	114139802	114139933	chr13-114139802-DEL-132	chr13	114120001	114145000	0.620503	1.02609	1.00979	0.768503	1.27275	1.38704	1.34143	0.770464	0.916241	1.01771	0.586376	1.1367	1.04945	1.4373	1.18447	0.565623	1.49267	1.00282	1.18039	0.959833	1.16987	1.40009	0.902244	0.779284	1.60605	0.607556	1.47654	0	0.311069	0.311069
chr13	114225120	114226405	chr13-114225120-DEL-1286	chr13	114215001	114240000	1.24113	2.46959	2.05	2.0749	2.73121	2.80201	2.47397	1.86547	2.22713	2.42182	2.15859	2.10299	2.47828	2.67925	2.06938	1.96633	2.34286	2.27403	2.04018	2.57927	1.94659	2.34785	2.01658	2.5701	2.34792	2.13137	2.45225	0	0.656457	0.656457
chr13	114231193	114231420	chr13-114231193-DEL-228	chr13	114215001	114240000	1.24113	2.46959	2.05	2.0749	2.73121	2.80201	2.47397	1.86547	2.22713	2.42182	2.15859	2.10299	2.47828	2.67925	2.06938	1.96633	2.34286	2.27403	2.04018	2.57927	1.94659	2.34785	2.01658	2.5701	2.34792	2.13137	2.45225	0	0.82009	0.82009
chr14	22110515	22110835	chr14-22110515-DEL-321	chr14	22100001	22125000	0.224656	0.389601	0.357824	0.556704	0.491524	0.763035	0.418638	0.593328	0	1.26324	0.346586	0.295515	0.343229	0.619843	0.99573	0.270182	0.71311	0.464925	0.502449	0.468776	0.286898	0	0.433798	0	0.488326	0.210553	0	4	0.821365	0.821365
chr14	29526533	29526660	chr14-29526533-DEL-128	chr14	29525001	29550000	0.283788	0.684069	0	1.15246	0.680955	0	0.425642	1.15257	0	0	0	0	0.858907	0.314398	0	0.527916	0	0.245646	0.891292	0.420174	0.719645	1.04485	1.03019	0.535757	0.61092	0.275717	0.613885	8	0.0510217	0.0510217
chr14	31473790	31474114	chr14-31473790-DEL-325	chr14	31450001	31475000	0.455701	0.791328	1.07649	0.487614	0.980218	0.817355	0.632457	0.842913	0.877599	1.14419	1.1138	0.913271	0.721846	1.06076	0.941141	1.26787	1.20126	0.851003	0.832268	0.808345	1.10634	1.27791	0.945819	1.23916	0.768137	0.953173	0.902903	0	0.340134	0.340134
chr14	32484099	32485134	chr14-32484099-DEL-1036	chr14	32465001	32490000	0.216661	0	0.477473	0.466584	0.501275	0	0	0	0	0.883917	0	0.480634	0.106187	0	0	0	0.401641	0.467003	0.357742	0	0.587424	0.709674	0.509995	0	0.50516	0.612196	0	12	0.26808	0.26808
chr14	33820830	33821168	chr14-33820830-DEL-339	chr14	33805001	33830000	0.601308	0.955948	1.32972	1.17597	0	1.46094	1.39523	1.43269	1.49963	1.70063	0.724712	0.921806	0.905263	1.34701	0	0	1.32589	1.05796	1.36177	1.4589	1.24758	1.33726	1.3996	2.09188	1.325	0.949535	1.01324	3	0.307692	0.307692
chr14	35038495	35040301	chr14-35038495-DEL-1807	chr14	35035001	35060000	0.244004	0	0.11086	0	0	0	0	0.252513	0	0	0	0	0	0	0	0	0	0.432157	0	0	0	0.855886	0	0	0.772905	0	0	21	0.462387	0.462387
chr14	35948745	35949338	chr14-35948745-DEL-594	chr14	35945001	35970000	0.386481	0.673856	0.823248	0.250895	0.370819	0.33961	0.441829	0.718577	0.710702	0.778976	0.835982	0.316801	0.659432	0.668942	0.737033	0.492518	0.539386	0.760623	0.601017	0.94198	0.703885	0.733011	0.457725	0.865467	0.792778	0.631017	0.457481	0	0.177592	0.177592
chr14	39277673	39277760	chr14-39277673-DEL-88	chr14	39255001	39280000	0.233729	0.279521	0	0	0	0	0	0	0	0	0	0.428927	0	0	0	0.834271	0.340733	0.168744	0.301328	0	0	0.468749	0	0	0.481581	0.157423	0.298747	16	0.230769	0.230769
chr14	45823427	45823737	chr14-45823427-DEL-311	chr14	45820001	45845000	0.358676	0	0	0	0.434557	0	0.710166	0	0	0	0.0277341	0	0.560162	0.743879	0	0.701865	0.8546	0	0.627415	0.648484	0	0.346617	0	0	0.823035	0	0	15	0.231155	0.231155
chr14	46361259	46361388	chr14-46361259-DEL-130	chr14	46345001	46370000	0.181522	0.225539	0	0	0.221608	0.20482	0	0.503762	0.126783	0.480223	0	0	0.147003	0	0	0.316246	0.623029	0.433252	0.365294	0	0	0.782375	0.611643	0.374445	0	0.262541	0	11	0.486136	0.486136
chr14	50942182	50942812	chr14-50942182-DEL-631	chr14	50935001	50960000	0.187597	0	0	0	0	0.385661	0.39888	0.324027	0	0.291811	0	0.237995	0.334117	0.592704	0	0.442143	0	0	0	0.697582	0	0.788818	0	0.301316	0.340732	0	0.205868	13	0.882274	0.882274
chr14	51144230	51144293	chr14-51144230-DEL-64	chr14	51135001	51160000	0.448932	0	0.854165	0.695876	1.12372	0.995669	1.10659	0.666352	0.728655	0.847622	0.843014	0.575343	0	1.16544	0.850286	0.932026	0.980418	1.24355	0.85754	1.0298	0	1.1415	1.01284	1.07649	1.0656	0.936401	1.02706	3	0.656457	0.656457
chr14	56564496	56564848	chr14-56564496-DEL-353	chr14	56545001	56570000	0.287211	0.717122	0.815059	0.453441	0.519227	0.383263	0.2608	0.607896	0	0.607077	0	0.578199	0	0.402201	0.559212	0	0.549781	0.867178	0	0.406139	0.410553	0.859287	0.087349	0	0.677536	0.37833	0.681845	6	0.538462	0.538462
chr14	61755316	61755383	chr14-61755316-DEL-68	chr14	61750001	61775000	0.326236	0.322089	0.401707	0.114771	0.354551	0.617891	0.201675	0.196856	0	0.337182	0.440437	0.1634	0	0.456537	0.278362	0.266189	0.305077	0.528213	0.372923	0.575139	0.51952	0	0.461254	0	0.673406	0.372214	0	5	0.574892	0.574892
chr14	64327404	64327538	chr14-64327404-DEL-135	chr14	64310001	64335000	1.08694	1.90954	1.90004	2.0012	2.10073	2.18197	1.94302	1.43736	2.06559	2.03733	2.0279	1.85032	1.85898	2.04447	1.89468	2.16455	1.80143	1.91618	1.95508	2.17091	1.91519	2.12267	1.97902	1.86869	1.84835	1.91447	2.3164	0	0.134991	0.269981
chr14	64327404	64327538	chr14-64327404-DEL-135	chr14	64320001	64345000	1.08694	1.90954	1.90004	2.0012	0	2.18197	1.94302	1.43736	2.06559	2.03733	0	0	1.85898	2.04447	0	2.16455	0	1.91618	0	2.17091	1.91519	2.12267	1.97902	1.86869	0	1.91447	2.3164	7	0.483794	0.483794
chr14	64893669	64896822	chr14-64893669-DEL-3154	chr14	64890001	64915000	0.775394	1.07162	1.47051	1.30952	1.65733	1.61595	1.22124	0.738345	1.00362	0.897098	1.34721	1.19308	0.9974	1.46059	1.06826	1.08928	1.37478	1.75072	0.949102	1.6562	1.33994	1.83602	1.12443	1.50808	1.61896	1.15927	1.23169	0	0.540769	0.540769
chr14	64894905	64895080	chr14-64894905-DEL-176	chr14	64890001	64915000	0.775394	1.07162	1.47051	1.30952	1.65733	1.61595	1.22124	0.738345	1.00362	0.897098	1.34721	1.19308	0.9974	1.46059	1.06826	1.08928	1.37478	1.75072	0.949102	1.6562	1.33994	1.83602	1.12443	1.50808	1.61896	1.15927	1.23169	0	0.230718	0.230718
chr14	66343912	66344223	chr14-66343912-DEL-312	chr14	66330001	66355000	0.439491	0.773533	0.815291	0.926324	1.01205	0.776473	0.505492	0	0.801237	0.877889	0.625929	0.622191	1.13489	1.19755	1.12846	0.585619	0.828362	0.917654	0.779793	0.797508	0.752558	1.16447	0.788154	0.484117	0.58849	0.580096	0	2	0.63402	0.63402
chr14	70825425	70825530	chr14-70825425-DEL-106	chr14	70805001	70830000	0.994867	1.62376	1.64084	1.86086	1.76069	1.77784	1.47474	1.63509	1.35847	1.49692	1.54723	1.85851	1.61052	1.57642	1.07532	2.06171	1.83332	1.93667	1.59942	2.2034	1.69371	2.24086	1.58129	1.8664	1.7823	1.75257	1.54847	0	0.297233	0.297233
chr14	72024077	72024126	chr14-72024077-DEL-50	chr14	72010001	72035000	0.252013	0.475344	0	0	0.376103	0	0.413643	0.522487	0.330329	0	0.395412	0.426235	0	0	0	0.28721	0	0.605413	0.246945	0.365185	0	0.284283	0.626799	0.300837	0.533511	0	0	11	0.812308	0.812308
chr14	73487005	73487303	chr14-73487005-DEL-299	chr14	73470001	73495000	1.38127	3.4553	2.74123	3.42579	0	3.10666	2.67878	3.27808	2.57264	2.66032	2.0869	2.47444	1.84516	2.93556	2.78105	4.16952	2.65626	2.23684	2.42413	2.49501	2.33547	2.56806	2.32945	2.53375	2.13599	2.66417	2.24136	1	0.75263	0.75263
chr14	76347431	76347865	chr14-76347431-DEL-435	chr14	76345001	76370000	0.203391	0	0	0	0	0	0	0	0.289592	0	0.490223	0	0	0	0	0.579668	0.316806	0.324969	0	0	0.357677	0.607526	0	0	0	0.296756	0	18	0.75263	0.75263
chr14	76358324	76358387	chr14-76358324-DEL-64	chr14	76345001	76370000	0.203391	0	0	0	0	0	0	0	0.289592	0	0.490223	0	0	0	0	0.579668	0.316806	0.324969	0	0	0.357677	0.607526	0	0	0	0.296756	0	18	0.462387	0.462387
chr14	81002772	81003083	chr14-81002772-DEL-312	chr14	80990001	81015000	0.750673	1.52295	1.03137	1.27089	1.23846	1.3576	1.10587	1.05357	0.868466	1.398	1.60669	0.882156	0.907096	0.993796	0.776813	1.68548	1.13248	1.29935	0.94185	1.17421	1.37882	0.817589	1.13019	1.48068	0.741857	1.00414	1.215	0	0.791615	0.791615
chr14	87924251	87924324	chr14-87924251-DEL-74	chr14	87920001	87945000	0.8189	1.35123	1.48278	1.98873	1.83334	1.64156	1.6578	1.67092	1.58017	2.11247	2.01313	1.55329	1.83021	0	1.34228	0	1.76536	1.63957	1.40648	1.44588	1.41906	1.79079	1.52704	0	1.7062	1.11222	1.53004	3	0.193151	0.193151
chr14	88789448	88789669	chr14-88789448-DEL-222	chr14	88770001	88795000	0.187711	0	0.588472	0.450144	0.278707	0.722983	0.477475	0.600411	0	0.350759	0.287014	0.273029	0.213957	0.357787	0.493794	0.363968	0.570269	0.3307	0.312798	0.554497	0.269958	0.416099	0.15812	0.624938	0.332116	0.310898	0.653136	2	0.362158	0.362158
chr14	89506432	89506481	chr14-89506432-DEL-50	chr14	89495001	89520000	0.320569	0	0.28929	0.407022	0.629976	0.313597	0.370791	0.805827	0.242799	0	0.320424	0.281676	0	0	0	0	0	0.535553	0.254478	0.384427	0	0.476486	0	0	0.473352	0	0	12	0.45703	0.45703
chr14	95366377	95366436	chr14-95366377-DEL-60	chr14	95355001	95380000	0.3907	0.509284	0	0	0	0	0	0	0	0	0	0.53604	0.633546	0	0	0	0	0	0	0	0	0.774777	0	0.640399	0.344409	0	0	20	0.273981	0.273981
chr14	95423553	95423603	chr14-95423553-DEL-51	chr14	95410001	95435000	0.597147	1.07719	1.56259	1.71273	1.72262	1.70479	1.41611	1.31025	1.56801	1.43662	1.6146	1.13162	1.21641	1.69078	1.67078	1.1048	1.64056	1.89408	1.31173	1.54897	0	1.52471	1.54101	1.81843	1.63176	1.39396	1.5662	1	0.121434	0.121434
chr14	95787564	95787655	chr14-95787564-DEL-92	chr14	95775001	95800000	0.362568	0	0.463595	0.661573	0.614863	0.667928	0.714021	0.498541	0.437146	0.500275	0.718742	0.670854	0.548732	0.799205	0.726329	0.803654	0.716774	0.396608	0.884911	1.00973	0.559176	0.792891	0.795487	0.638775	0.645439	0.697374	0	2	0.938176	0.938176
chr14	100378661	100378993	chr14-100378661-DEL-333	chr14	100375001	100400000	1.15032	1.68712	1.94563	1.48301	1.88479	1.7804	1.98627	1.87963	1.6718	1.71475	1.92215	1.76666	1.50478	2.09183	0	1.61632	1.8977	1.87856	1.48898	1.53795	1.40427	2.2045	1.60262	2.58134	1.78422	1.88233	2.10788	1	0.196273	0.196273
chr14	102135204	102135363	chr14-102135204-DEL-160	chr14	102125001	102150000	0.275037	0.61955	0	0.66528	0	0	0.612883	0.850235	0	0.733396	0	0	0	0	0	0	1.02218	0	0	0	0.739376	0	0	0.874226	0	0	0	18	0.723619	0.723619
chr14	103076993	103077125	chr14-103076993-DEL-133	chr14	103055001	103080000	0.557606	1.36024	1.23898	1.47558	1.24862	1.28322	1.02861	1.19851	0.87484	1.35478	1.32699	1.24477	1.56583	0.991547	1.36583	1.06153	1.66804	1.11678	1.41012	1.02016	0.903327	1.45778	1.15005	1.04264	1.48287	0.971958	0.965732	0	0.486136	0.486136
chr14	103297685	103297788	chr14-103297685-DEL-104	chr14	103285001	103310000	0.289272	0.884009	0	0	1.20828	0	0	0	0.793844	0	0.989557	1.05468	0.829584	0	0.973207	0.983891	0.723241	1.05923	0	1.18071	0	0	0.952729	1.0225	0.928077	0	1.26647	11	0.856355	0.856355
chr14	104826838	104827023	chr14-104826838-DEL-186	chr14	104825001	104850000	0.578985	0	0	0	0	0	0	0	0	1.37182	0	0.726121	0	0	0	0	0	0	0	1.08509	0	0	0	1.48039	0.750941	0	0	21	0.506549	0.506549
chr14	104884692	104884742	chr14-104884692-DEL-51	chr14	104865001	104890000	0.245722	0.804333	0	0	0	1.18829	0	1.07739	0	0	0.946223	0	0.805052	0	0	1.46881	0	0.945177	1.12607	0	0.416485	0	0	0	0.750941	1.10985	0	15	0.89189	0.89189
chr14	106018356	106027911	chr14-106018356-DEL-9556	chr14	105995001	106020000	0.895116	2.47316	1.42764	1.51849	0	1.0107	0	1.41042	1.44039	0.392076	1.40879	1.03266	1.63308	0	0	0	0.865304	0	0.44019	0.978696	0.796108	2.9423	0	0.617828	1.05566	0	0	9	0.692499	0.692499
chr14	106300339	106300676	chr14-106300339-DEL-338	chr14	106295001	106320000	0.433708	0	0.399944	0	0	0	0	0	0	0	0	0	0	0	0	1.62331	0	0	0	0	0	0	0	0	1.34564	0	0	23	0.923077	0.923077
chr14	106714599	106762008	chr14-106714599-DEL-47410	chr14	106760001	106785000	1.20753	2.54213	0	0.833395	0.959493	1.12998	1.32653	0	0	2.21702	0	1.17085	0	2.11804	3.17225	1.5388	0	2.99313	0.288542	0	2.95933	1.8398	2.44307	0.941721	0.620508	3.70445	3.80148	7	0.88	0.88
chr14	106763577	106763678	chr14-106763577-DEL-102	chr14	106760001	106785000	1.20753	2.54213	0	0.833395	0.959493	1.12998	1.32653	0	0	2.21702	0	1.17085	0	2.11804	3.17225	1.5388	0	2.99313	0.288542	0	2.95933	1.8398	2.44307	0.941721	0.620508	3.70445	3.80148	7	0.622736	0.622736
chr15	23049493	23049564	chr15-23049493-DEL-72	chr15	23035001	23060000	0.946497	2.28022	1.64238	0	1.72091	2.73142	0.117224	2.12659	0	1.94179	0	0.352362	1.22373	1.60206	1.56077	0.885225	2.54669	0.830822	2.31523	2.22045	1.15156	0.258464	0.227806	2.28549	0.433031	1.04109	0	4	0.355123	0.355123
chr15	23862577	23862729	chr15-23862577-DEL-153	chr15	23860001	23885000	0.199231	0	0	0	0	0	0	0.158865	0.664561	0.314688	0	0	0	0.572261	0	0	0.233169	0	0	0.511509	0.217962	0.745727	0	0	0.333908	0	0	17	0.443077	0.443077
chr15	24395822	24395903	chr15-24395822-DEL-82	chr15	24380001	24405000	0.296887	0	0	1.21264	0	0.729168	0.684252	0	0	0	0.654642	0	0	5.25179	0	0.198908	0.268411	0	0	0.413596	0.708413	0.445371	0	0	0.928672	0	0	15	0.949802	0.949802
chr15	25686250	25687233	chr15-25686250-DEL-984	chr15	25670001	25695000	0.478009	0	0	0	0	0.285605	0	0	0.21403	0	0	0	0.443428	0	0	0.272837	0.627223	0.548398	0	0	0	0.655117	0.517409	0	0.383321	0	0.71429	16	0.75786	0.75786
chr15	27770729	27770788	chr15-27770729-DEL-60	chr15	27755001	27780000	0.211558	0.111427	0	0	0	0.188092	0	0.264962	0	0.279969	0	0.288713	0	0.275361	0	0	0.516624	0	0	0.0895655	0	0	0	0	0	0.354573	0	17	0.312319	0.560362
chr15	27770729	27770788	chr15-27770729-DEL-60	chr15	27765001	27790000	0.211558	0.111427	0	0.467514	0.503951	0	0	0	0.253759	0	0	0.288713	0	0	0.179879	0	0.516624	0	0.379297	0.0895655	0	0	0	0.521619	0	0.354573	0	15	0.560362	0.560362
chr15	31510512	31510561	chr15-31510512-DEL-50	chr15	31490001	31515000	1.05873	2.06474	1.92697	1.99167	1.9835	1.85159	1.47981	1.79472	1.61326	1.67446	1.75241	1.48141	1.36243	1.76189	2.16499	2.26756	2.33769	0.981007	1.43912	1.68611	2.24547	2.18755	1.71501	1.95604	1.88293	2.1508	2.36724	0	0.139187	0.139187
chr15	31510783	31510905	chr15-31510783-DEL-123	chr15	31490001	31515000	1.05873	2.06474	1.92697	1.99167	1.9835	1.85159	1.47981	1.79472	1.61326	1.67446	1.75241	1.48141	1.36243	1.76189	2.16499	2.26756	2.33769	0.981007	1.43912	1.68611	2.24547	2.18755	1.71501	1.95604	1.88293	2.1508	2.36724	0	0.446358	0.446358
chr15	31511096	31511595	chr15-31511096-DEL-500	chr15	31490001	31515000	1.05873	2.06474	1.92697	1.99167	1.9835	1.85159	1.47981	1.79472	1.61326	1.67446	1.75241	1.48141	1.36243	1.76189	2.16499	2.26756	2.33769	0.981007	1.43912	1.68611	2.24547	2.18755	1.71501	1.95604	1.88293	2.1508	2.36724	0	1	1
chr15	40037616	40037699	chr15-40037616-DEL-84	chr15	40025001	40050000	1.62669	3.0225	2.57638	2.47474	2.4965	2.45876	1.9927	2.74676	2.55104	2.60857	2.45103	2.61041	2.67658	2.58109	2.16	3.36263	2.67531	2.19741	2.41947	3.00221	2.54838	2.61804	2.49193	2.20062	2.72982	2.57225	2.618	0	0.242784	0.242784
chr15	40604194	40604245	chr15-40604194-DEL-52	chr15	40585001	40610000	0.48972	0.290663	0.524925	0.679892	0.766254	0.721641	0.349688	0.760648	0.595864	0.350718	0.593636	0.640219	0.389754	0.393604	0.260545	0.644015	0.514393	0.262146	0.469301	0.55055	0.708177	0.562077	0.587873	0.717916	0.564187	0.612434	0.465598	0	0.711336	0.711336
chr15	41293510	41293577	chr15-41293510-DEL-68	chr15	41270001	41295000	0.259091	0	0	0	0	0	0	0	0	0	0	0	0	0	0.514887	0	0.107996	0	0	0	0	0	0	0	0	0	0	24	0.672262	0.672262
chr15	44840877	44841015	chr15-44840877-DEL-139	chr15	44830001	44855000	0.769877	0	0.823562	2.05069	0	1.50343	0	1.219	1.23123	1.43847	1.70332	0	1.24298	1.38916	1.92424	1.42894	1.46241	0	1.48965	0	0	0	1.27146	0	1.33852	0	0	11	0.374396	0.374396
chr15	45462548	45462637	chr15-45462548-DEL-90	chr15	45450001	45475000	0.665416	0	0.650781	0	1.15575	0	0	0.544892	0	0	0	0	0	0.49415	1.34387	0	1.46932	0	0	0	0	0	0.579825	0.456235	1.02234	0	1.70341	16	0.769231	0.769231
chr15	45462841	45463058	chr15-45462841-DEL-218	chr15	45450001	45475000	0.665416	0	0.650781	0	1.15575	0	0	0.544892	0	0	0	0	0	0.49415	1.34387	0	1.46932	0	0	0	0	0	0.579825	0.456235	1.02234	0	1.70341	16	0.769231	0.769231
chr15	50156070	50156135	chr15-50156070-DEL-66	chr15	50140001	50165000	0.406515	0	0.524445	0.585773	0.492383	0.717276	0.955818	1.04079	0	0	0.620172	0.67723	0.372054	0	0.597375	0.563063	0.580076	0	0.871643	0.790932	0.776006	1.16967	0	0.711535	0.649231	0.605132	0.769296	6	0.699944	0.699944
chr15	50340853	50340924	chr15-50340853-DEL-72	chr15	50330001	50355000	0.700835	1.47492	1.21859	1.14754	1.65951	1.35822	1.71299	1.22388	0	1.5847	1.30865	1.28744	1.31359	1.61927	1.82813	1.08165	1.25736	1.27715	1.41088	1.70323	1.29014	1.49932	1.25065	1.75182	1.24827	1.24001	1.6913	1	0.198164	0.198164
chr15	50495240	50495295	chr15-50495240-DEL-56	chr15	50485001	50510000	0.352613	0.321831	0.58762	0.594636	1.00415	0.630344	0.339409	0.485691	0.294114	0.758218	0.528293	0	0.499327	0.75712	0	0.599753	0.576347	0	0.608391	0.506945	0	0.508095	0.440508	0.609109	0.503888	0.600349	0.580773	4	0.258577	0.258577
chr15	50679109	50679219	chr15-50679109-DEL-111	chr15	50665001	50690000	0.38709	0	0	1.00869	0.869895	0.802542	0.890083	0.923542	0.765941	0.800604	0.96731	0.824515	0.474607	0.798424	0.68577	0.754798	0.719658	0.91143	1.02721	0.865951	0.806654	1.02993	0.75267	0.801035	0.730458	0.759871	0.877087	2	0.899787	0.899787
chr15	51293987	51294258	chr15-51293987-DEL-272	chr15	51270001	51295000	0.418332	0.829696	0.968898	0.718676	0.727846	1.05637	0	0.654648	0.765876	0.817492	0.429455	0.498934	0.79625	1.29533	0	0.719833	0.790569	0.869722	0.970722	0.809654	0	1.41904	0.651165	1.08427	0.746719	0.806111	1.19596	3	0.119502	0.119502
chr15	52232987	52233319	chr15-52232987-DEL-333	chr15	52230001	52255000	0.950335	1.81612	1.52477	1.5496	2.02048	1.71911	1.56321	1.39318	1.67612	1.64939	1.88491	1.4431	1.91061	2.08021	1.73101	1.44877	1.60735	1.32327	1.72591	1.75178	1.54327	2.095	1.46087	1.47838	1.92765	1.54891	1.68538	0	0.935022	0.935022
chr15	59704663	59704723	chr15-59704663-DEL-61	chr15	59680001	59705000	0.955316	1.7854	1.66336	1.64601	1.53894	1.386	1.43042	1.26623	1.61151	1.84385	1.12852	1.60322	1.28387	1.15324	1.78161	1.27571	1.74101	1.38505	1.72921	1.5746	0.977708	1.35986	1.43827	1.20821	1.599	1.03684	1.88334	0	0.791615	0.791615
chr15	64371909	64372027	chr15-64371909-DEL-119	chr15	64370001	64395000	0.472567	0.966358	0.622291	0	0.932384	0.935158	0.971107	1.01047	0	0.943982	0.914661	0.867799	0.782662	0.755461	1.11093	0	1.31343	0.779424	0.914922	1.01521	0.802817	0.913738	0.855552	0.950979	0	0.657109	0.932953	4	0.230769	0.692308
chr15	64371909	64372027	chr15-64371909-DEL-119	chr15	64350001	64375000	0.472567	0	0	0.864796	0	0	0.971107	0	0.820795	0	0	0	0.782662	0	1.11093	1.03909	1.31343	0.779424	0.914922	0	0.802817	0.913738	0	0	1.16852	0	0	14	0.692308	0.692308
chr15	64371909	64372027	chr15-64371909-DEL-119	chr15	64355001	64380000	0.472567	0	0	0.864796	0	0	0.971107	0	0.820795	0	0	0	0.782662	0	1.11093	1.03909	1.31343	0.779424	0.914922	0	0.802817	0.913738	0	0	1.16852	0	0	14	0.692308	0.692308
chr15	65523707	65526937	chr15-65523707-DEL-3231	chr15	65510001	65535000	0.321819	0.592174	0.362171	0.552721	0.787036	0.745575	0.527732	0	0.769221	0.456623	0.568591	0.330036	0.554691	0	1.10987	0	0.228072	0.390713	0	0.647809	0.439321	0.869672	0.308412	0.406741	0.595644	0.426023	0.915876	4	0.672262	0.672262
chr15	66585310	66586076	chr15-66585310-DEL-767	chr15	66575001	66600000	0.347199	1.15191	0.888648	0.721189	0.625323	0.751667	0.645703	0.726364	0.833642	0	1.23423	0.753258	0.596228	0	0	0.710069	1.26237	0.975862	0.821128	0.999587	0.633161	0.771538	1.02172	0.836503	0.992271	0.896776	0.928149	3	1	1
chr15	67242128	67242461	chr15-67242128-DEL-334	chr15	67230001	67255000	0.226938	0	0	0.434455	0.236768	0	0	0	0	0	0	0	0	0.333165	0	0	0	0	0	0	0	0	0	0	0	0	0	23	0.609783	0.609783
chr15	67246629	67246694	chr15-67246629-DEL-66	chr15	67230001	67255000	0.226938	0	0	0.434455	0.236768	0	0	0	0	0	0	0	0	0.333165	0	0	0	0	0	0	0	0	0	0	0	0	0	23	0.609783	0.609783
chr15	68397202	68397297	chr15-68397202-DEL-96	chr15	68385001	68410000	0.246941	0	0	0	0.584202	0.597688	0	0.391279	0.566446	0.570616	0	0	0	0	0.610595	0	0	0	0.473955	0.635237	0	0.767714	0.714805	0	0	0	0.708499	15	0.769231	0.769231
chr15	68691333	68691624	chr15-68691333-DEL-292	chr15	68675001	68700000	0.206341	0	0.784759	0	0	0	0	0.696287	0	0.545073	0	0	0.986999	0	0	0	0.566348	0	0	0.548037	0	0.869942	0.667977	0	0.649613	0	1.14577	16	0.538462	0.538462
chr15	68757229	68757557	chr15-68757229-DEL-329	chr15	68740001	68765000	0.416504	0	0.808619	0	0	0	0	0.425909	0	1.04757	0	0	0	0	0	0	0.6688	0	0	0	0	0.880486	0.69512	0	0.839907	0	0	19	0.441538	0.441538
chr15	70729501	70735169	chr15-70729501-DEL-5669	chr15	70725001	70750000	0.316873	0.233264	0.302432	0	0	0.299735	0	0	0.468328	0.684233	0	0.32108	0.288993	0.472133	0	0	0	0.540751	0	0	0	0	0	0.212646	0	0	0	16	0.260831	0.260831
chr15	77038406	77040380	chr15-77038406-DEL-1975	chr15	77025001	77050000	0.46569	0.495185	0	0	0.799143	0.619078	0	0	0	0	0.62552	0	0	0	0.547464	0.595886	0.674138	0.63888	0.70647	0	0.57886	1.36362	0.571895	0.842487	0.6457	0.704238	0.973483	10	0.496774	0.496774
chr15	79599502	79599822	chr15-79599502-DEL-321	chr15	79585001	79610000	0.252551	0	0.716434	0	0.913628	0.647803	0	0	0.989751	0.815228	0.391118	0	0.733567	0.322941	0	0.493745	0.689517	1.60383	0.538676	0.66547	0	0.705516	0.484289	0.116705	0.955866	0	0.957608	8	0.604919	0.604919
chr15	80004743	80004835	chr15-80004743-DEL-93	chr15	79990001	80015000	0.479827	0.89477	1.11132	0.871066	1.34188	1.22977	1.31225	0	1.08203	1.07058	0	1.06544	0.855202	1.04956	0.564836	1.23472	0	0.867179	0.955978	1.05886	1.12195	1.1986	0.929442	0.966005	1.22329	1.21493	1.29019	3	0.111973	0.111973
chr15	82997739	82997868	chr15-82997739-DEL-130	chr15	82990001	83015000	0.870625	1.2737	1.79163	0.926993	1.32451	1.61222	1.09256	0.876861	0.753264	1.19359	0.807607	1.37369	0.957171	0.942443	0.837173	1.33709	1.29414	1.28797	0.875186	0.954997	0.862273	1.11485	1.31418	0.789341	1.32045	0.95385	1.38865	0	0.335834	0.335834
chr15	83229365	83229487	chr15-83229365-DEL-123	chr15	83220001	83245000	0.904037	1.4392	1.43058	0.981902	1.51971	1.09721	0.855394	0.799696	1.25206	0	1.21549	1.18378	0.652223	1.31321	1.02017	1.78585	2.00319	1.25129	1.00369	1.3101	1.55781	1.8675	1.59406	1.84132	1.52935	0.906107	1.17962	1	1	1
chr15	85853433	85853973	chr15-85853433-DEL-541	chr15	85840001	85865000	0.895505	1.64075	2.24206	1.95353	1.95687	2.0202	1.92861	1.80186	2.40751	1.77433	1.69182	2.00319	2.04049	2.25537	1.82213	1.7359	2.1592	2.09828	1.94442	2.25051	2.03811	2.45345	1.51078	2.01035	1.99023	2.0779	2.24255	0	0.355123	0.355123
chr15	88552420	88552497	chr15-88552420-DEL-78	chr15	88540001	88565000	0.5178	0	0	0	0	0	0.24094	0	0.436803	0	0	0	0	0	0	1.05008	0.531049	0	0	0.289965	0	0.469098	0.403933	0	0.384769	0.241119	0.235346	16	0.88	0.88
chr15	88553042	88553169	chr15-88553042-DEL-128	chr15	88540001	88565000	0.5178	0	0	0	0	0	0.24094	0	0.436803	0	0	0	0	0	0	1.05008	0.531049	0	0	0.289965	0	0.469098	0.403933	0	0.384769	0.241119	0.235346	16	0.899787	0.899787
chr15	88554477	88554530	chr15-88554477-DEL-54	chr15	88540001	88565000	0.5178	0	0	0	0	0	0.24094	0	0.436803	0	0	0	0	0	0	1.05008	0.531049	0	0	0.289965	0	0.469098	0.403933	0	0.384769	0.241119	0.235346	16	0.157008	0.157008
chr15	89325088	89325271	chr15-89325088-DEL-184	chr15	89325001	89350000	1.30142	2.33944	2.72781	2.34437	2.94626	2.43018	2.08824	2.15111	2.49718	2.36846	2.37743	2.28231	1.96244	2.52711	2.71846	2.31628	2.59642	2.60211	2.20013	2.34427	1.97074	2.73501	2.33718	2.18714	2.4908	1.85478	2.42831	0	0.247091	0.247091
chr15	89745862	89745931	chr15-89745862-DEL-70	chr15	89725001	89750000	0.409572	1.02584	1.05501	0.859012	0.818828	0.987445	0.935575	0.777472	0.693412	0.769212	0.966409	0.652193	0.71776	1.1344	1.21703	0.611142	0.674698	1.01998	0.985802	1.07062	1.13817	1.03905	0.983037	1.49995	0.983929	0.804457	1.08132	0	0.412998	0.412998
chr15	90630743	90631075	chr15-90630743-DEL-333	chr15	90620001	90645000	1.13319	0	1.60554	1.67021	1.91745	1.82388	1.94144	1.72917	0	2.1461	1.71544	0	1.5903	0	1.71684	1.68925	1.72044	1.83573	1.66412	1.60794	0	2.00952	1.75749	1.68492	1.63795	1.71252	1.79933	5	0.352308	0.352308
chr15	91047755	91048014	chr15-91047755-DEL-260	chr15	91040001	91065000	0.793659	1.95546	1.70673	1.69952	2.08961	2.01139	2.42479	1.09007	1.76883	1.45576	1.42913	1.95832	1.34876	1.98912	1.85302	1.29856	1.92043	1.51902	1.55809	2.16003	1.57399	1.84745	1.76405	2.36529	2.23179	1.51555	2.55639	0	0.0330713	0.0330713
chr15	96228496	96228546	chr15-96228496-DEL-51	chr15	96225001	96250000	0.242251	0	0	0	0	0	0	0	0	0.229164	0.211405	0	0.157784	0.244998	0	0	0	0	0	0	0	0	0	0	0.665567	0	0	21	0.764841	0.764841
chr15	98299096	98300576	chr15-98299096-DEL-1481	chr15	98290001	98315000	0.316954	1.1464	0	0.793569	0	0	0	1.24949	0	0.994676	0	0	0.971676	0	0.540031	1.09666	0	0.859237	0	0	0	0	0	0.929782	0	0	0	17	0.188246	0.188246
chr15	99798375	99798474	chr15-99798375-DEL-100	chr15	99790001	99815000	0.426534	0.842556	0.594059	1.41839	1.07357	0.690972	1.409	0	0.600913	0	0.939568	0.809422	0.618268	0	0.97912	0.71708	1.16399	0.537849	0.845523	1.24841	1.18887	0.999908	0	1.0357	0.743262	0.935321	1.21678	4	0.180439	0.180439
chr15	99799780	99800188	chr15-99799780-DEL-409	chr15	99790001	99815000	0.426534	0.842556	0.594059	1.41839	1.07357	0.690972	1.409	0	0.600913	0	0.939568	0.809422	0.618268	0	0.97912	0.71708	1.16399	0.537849	0.845523	1.24841	1.18887	0.999908	0	1.0357	0.743262	0.935321	1.21678	4	0.0220755	0.0220755
chr15	99799962	99800091	chr15-99799962-DEL-130	chr15	99790001	99815000	0.426534	0.842556	0.594059	1.41839	1.07357	0.690972	1.409	0	0.600913	0	0.939568	0.809422	0.618268	0	0.97912	0.71708	1.16399	0.537849	0.845523	1.24841	1.18887	0.999908	0	1.0357	0.743262	0.935321	1.21678	4	0.667254	0.667254
chr15	99806239	99806372	chr15-99806239-DEL-134	chr15	99790001	99815000	0.426534	0.842556	0.594059	1.41839	1.07357	0.690972	1.409	0	0.600913	0	0.939568	0.809422	0.618268	0	0.97912	0.71708	1.16399	0.537849	0.845523	1.24841	1.18887	0.999908	0	1.0357	0.743262	0.935321	1.21678	4	0.686632	0.686632
chr15	99808939	99809027	chr15-99808939-DEL-89	chr15	99790001	99815000	0.426534	0.842556	0.594059	1.41839	1.07357	0.690972	1.409	0	0.600913	0	0.939568	0.809422	0.618268	0	0.97912	0.71708	1.16399	0.537849	0.845523	1.24841	1.18887	0.999908	0	1.0357	0.743262	0.935321	1.21678	4	0.806683	0.806683
chr15	99926859	99927873	chr15-99926859-DEL-1015	chr15	99915001	99940000	0.614319	1.24596	1.20937	0.700908	1.80115	1.3091	1.02694	1.24266	0.728407	1.17347	1.21571	1.2861	0.641646	0	0.783746	1.36965	1.26242	1.77964	1.48204	1.10701	1.00899	1.72041	1.8066	1.05986	1.62371	0.682511	1.26272	1	0.978303	0.978303
chr15	99928212	99928299	chr15-99928212-DEL-88	chr15	99915001	99940000	0.614319	1.24596	1.20937	0.700908	1.80115	1.3091	1.02694	1.24266	0.728407	1.17347	1.21571	1.2861	0.641646	0	0.783746	1.36965	1.26242	1.77964	1.48204	1.10701	1.00899	1.72041	1.8066	1.05986	1.62371	0.682511	1.26272	1	0.959358	0.959358
chr15	100339565	100339624	chr15-100339565-DEL-60	chr15	100330001	100355000	0.227873	0.605202	0	0.552032	0.77641	0	0	0.602782	0.419549	0	0	0.636348	0	0.831356	0	0	0.738188	0	0.369557	0.568196	0.773027	0.571897	0.442317	0.960814	0.700232	0	0	11	0.177243	0.177243
chr15	100909079	100909219	chr15-100909079-DEL-141	chr15	100895001	100920000	0.885132	1.92699	1.55005	2.1487	2.18483	1.78288	1.69415	1.84121	1.76234	2.05623	1.71802	2.05829	1.80816	1.729	2.46824	2.05687	2.41675	1.9959	1.84105	1.8569	1.56443	1.75897	1.96097	2.13297	1.84053	2.02128	1.90427	0	0.495435	0.495435
chr15	100912863	100913171	chr15-100912863-DEL-309	chr15	100895001	100920000	0.885132	1.92699	1.55005	2.1487	2.18483	1.78288	1.69415	1.84121	1.76234	2.05623	1.71802	2.05829	1.80816	1.729	2.46824	2.05687	2.41675	1.9959	1.84105	1.8569	1.56443	1.75897	1.96097	2.13297	1.84053	2.02128	1.90427	0	0.882274	0.882274
chr15	101086139	101086200	chr15-101086139-DEL-62	chr15	101075001	101100000	0.434328	0.867857	0.871825	1.03698	0.661796	0	1.03268	0.698537	0	0.911997	0.853508	1.16138	1.05912	0.740721	1.25982	1.13215	0.870094	0.432698	0.432085	0.630154	1.10569	0.686269	0.693481	1.14434	0.763012	0	0	4	0.744473	0.744473
chr15	101086431	101086492	chr15-101086431-DEL-62	chr15	101075001	101100000	0.434328	0.867857	0.871825	1.03698	0.661796	0	1.03268	0.698537	0	0.911997	0.853508	1.16138	1.05912	0.740721	1.25982	1.13215	0.870094	0.432698	0.432085	0.630154	1.10569	0.686269	0.693481	1.14434	0.763012	0	0	4	0.959358	0.959358
chr15	101752603	101753063	chr15-101752603-DEL-461	chr15	101740001	101765000	0.773636	1.20443	1.65856	1.66067	0.724582	1.32079	1.32487	1.43986	1.19904	1.90491	1.1773	1.77853	1.59449	1.79414	1.35673	0	2.26351	1.01894	1.37924	1.67527	1.5354	1.9444	1.02078	1.99796	1.14377	1.55623	1.3651	1	0.470635	0.470635
chr15	101752695	101754025	chr15-101752695-DEL-1331	chr15	101740001	101765000	0.773636	1.20443	1.65856	1.66067	0.724582	1.32079	1.32487	1.43986	1.19904	1.90491	1.1773	1.77853	1.59449	1.79414	1.35673	0	2.26351	1.01894	1.37924	1.67527	1.5354	1.9444	1.02078	1.99796	1.14377	1.55623	1.3651	1	0.949802	0.949802
chr15	101753591	101754025	chr15-101753591-DEL-435	chr15	101740001	101765000	0.773636	1.20443	1.65856	1.66067	0.724582	1.32079	1.32487	1.43986	1.19904	1.90491	1.1773	1.77853	1.59449	1.79414	1.35673	0	2.26351	1.01894	1.37924	1.67527	1.5354	1.9444	1.02078	1.99796	1.14377	1.55623	1.3651	1	0.470635	0.470635
chr15	101754986	101755937	chr15-101754986-DEL-952	chr15	101740001	101765000	0.773636	1.20443	1.65856	1.66067	0.724582	1.32079	1.32487	1.43986	1.19904	1.90491	1.1773	1.77853	1.59449	1.79414	1.35673	0	2.26351	1.01894	1.37924	1.67527	1.5354	1.9444	1.02078	1.99796	1.14377	1.55623	1.3651	1	0.949802	0.949802
chr15	101755142	101755394	chr15-101755142-DEL-253	chr15	101740001	101765000	0.773636	1.20443	1.65856	1.66067	0.724582	1.32079	1.32487	1.43986	1.19904	1.90491	1.1773	1.77853	1.59449	1.79414	1.35673	0	2.26351	1.01894	1.37924	1.67527	1.5354	1.9444	1.02078	1.99796	1.14377	1.55623	1.3651	1	0.470635	0.470635
chr15	101756646	101759250	chr15-101756646-DEL-2605	chr15	101740001	101765000	0.773636	1.20443	1.65856	1.66067	0.724582	1.32079	1.32487	1.43986	1.19904	1.90491	1.1773	1.77853	1.59449	1.79414	1.35673	0	2.26351	1.01894	1.37924	1.67527	1.5354	1.9444	1.02078	1.99796	1.14377	1.55623	1.3651	1	0.949802	0.949802
chr15	101756990	101757080	chr15-101756990-DEL-91	chr15	101740001	101765000	0.773636	1.20443	1.65856	1.66067	0.724582	1.32079	1.32487	1.43986	1.19904	1.90491	1.1773	1.77853	1.59449	1.79414	1.35673	0	2.26351	1.01894	1.37924	1.67527	1.5354	1.9444	1.02078	1.99796	1.14377	1.55623	1.3651	1	0.470635	0.470635
chr15	101759539	101759603	chr15-101759539-DEL-65	chr15	101740001	101765000	0.773636	1.20443	1.65856	1.66067	0.724582	1.32079	1.32487	1.43986	1.19904	1.90491	1.1773	1.77853	1.59449	1.79414	1.35673	0	2.26351	1.01894	1.37924	1.67527	1.5354	1.9444	1.02078	1.99796	1.14377	1.55623	1.3651	1	0.470635	0.470635
chr15	101759816	101760776	chr15-101759816-DEL-961	chr15	101740001	101765000	0.773636	1.20443	1.65856	1.66067	0.724582	1.32079	1.32487	1.43986	1.19904	1.90491	1.1773	1.77853	1.59449	1.79414	1.35673	0	2.26351	1.01894	1.37924	1.67527	1.5354	1.9444	1.02078	1.99796	1.14377	1.55623	1.3651	1	0.949802	0.949802
chr15	101760686	101760776	chr15-101760686-DEL-91	chr15	101740001	101765000	0.773636	1.20443	1.65856	1.66067	0.724582	1.32079	1.32487	1.43986	1.19904	1.90491	1.1773	1.77853	1.59449	1.79414	1.35673	0	2.26351	1.01894	1.37924	1.67527	1.5354	1.9444	1.02078	1.99796	1.14377	1.55623	1.3651	1	0.470635	0.470635
chr15	101761311	101761466	chr15-101761311-DEL-156	chr15	101740001	101765000	0.773636	1.20443	1.65856	1.66067	0.724582	1.32079	1.32487	1.43986	1.19904	1.90491	1.1773	1.77853	1.59449	1.79414	1.35673	0	2.26351	1.01894	1.37924	1.67527	1.5354	1.9444	1.02078	1.99796	1.14377	1.55623	1.3651	1	0.899787	0.899787
chr15	101761448	101762343	chr15-101761448-DEL-896	chr15	101740001	101765000	0.773636	1.20443	1.65856	1.66067	0.724582	1.32079	1.32487	1.43986	1.19904	1.90491	1.1773	1.77853	1.59449	1.79414	1.35673	0	2.26351	1.01894	1.37924	1.67527	1.5354	1.9444	1.02078	1.99796	1.14377	1.55623	1.3651	1	0.949802	0.949802
chr15	101762347	101762534	chr15-101762347-DEL-188	chr15	101740001	101765000	0.773636	1.20443	1.65856	1.66067	0.724582	1.32079	1.32487	1.43986	1.19904	1.90491	1.1773	1.77853	1.59449	1.79414	1.35673	0	2.26351	1.01894	1.37924	1.67527	1.5354	1.9444	1.02078	1.99796	1.14377	1.55623	1.3651	1	0.470635	0.470635
chr15	101762854	101763041	chr15-101762854-DEL-188	chr15	101740001	101765000	0.773636	1.20443	1.65856	1.66067	0.724582	1.32079	1.32487	1.43986	1.19904	1.90491	1.1773	1.77853	1.59449	1.79414	1.35673	0	2.26351	1.01894	1.37924	1.67527	1.5354	1.9444	1.02078	1.99796	1.14377	1.55623	1.3651	1	0.470635	0.470635
chr15	101763576	101763913	chr15-101763576-DEL-338	chr15	101740001	101765000	0.773636	1.20443	1.65856	1.66067	0.724582	1.32079	1.32487	1.43986	1.19904	1.90491	1.1773	1.77853	1.59449	1.79414	1.35673	0	2.26351	1.01894	1.37924	1.67527	1.5354	1.9444	1.02078	1.99796	1.14377	1.55623	1.3651	1	0.470635	0.470635
chr15	101764232	101764484	chr15-101764232-DEL-253	chr15	101740001	101765000	0.773636	1.20443	1.65856	1.66067	0.724582	1.32079	1.32487	1.43986	1.19904	1.90491	1.1773	1.77853	1.59449	1.79414	1.35673	0	2.26351	1.01894	1.37924	1.67527	1.5354	1.9444	1.02078	1.99796	1.14377	1.55623	1.3651	1	0.470635	0.470635
chr16	186035	186272	chr16-186035-DEL-238	chr16	180001	205000	0.360653	0	1.1947	1.15985	0	1.27936	0.904733	1.24431	1.1989	0	0	0	0	0	1.0491	0	1.22917	0.989025	0.818503	0	0.816328	1.18136	1.00285	0	1.20354	0	0	12	0.474227	0.474227
chr16	186140	187139	chr16-186140-DEL-1000	chr16	180001	205000	0.360653	0	1.1947	1.15985	0	1.27936	0.904733	1.24431	1.1989	0	0	0	0	0	1.0491	0	1.22917	0.989025	0.818503	0	0.816328	1.18136	1.00285	0	1.20354	0	0	12	0.0684243	0.0684243
chr16	186327	186697	chr16-186327-DEL-371	chr16	180001	205000	0.360653	0	1.1947	1.15985	0	1.27936	0.904733	1.24431	1.1989	0	0	0	0	0	1.0491	0	1.22917	0.989025	0.818503	0	0.816328	1.18136	1.00285	0	1.20354	0	0	12	0.604919	0.604919
chr16	234032	234336	chr16-234032-DEL-305	chr16	215001	240000	0.280644	1.08631	0	0	1.25569	0	0	0	0	1.27314	1.16518	1.03392	1.54366	0.892303	1.0491	0.918626	1.22917	0	0	1.22791	0	0	0	1.15698	0	1.10328	1.34415	12	0.148119	0.148119
chr16	531613	531668	chr16-531613-DEL-56	chr16	520001	545000	0.370585	0	1.02851	0	0	0	0	0.632663	0.646694	0	0.61309	1.08264	0.350813	1.07574	1.4313	1.04633	0.950513	0.73938	0.693361	0	0	0	0.68184	0.931062	0	0	0	12	0.0672657	0.0672657
chr16	579428	579499	chr16-579428-DEL-72	chr16	560001	585000	0.447998	0.762647	0	0.568133	0	1.10094	0.818212	0	0	1.14994	0	0	0	0	1.4313	0	0	0	0	0	0.680795	1.38671	0	0.931062	0	0	1.38588	16	1	1
chr16	584945	585100	chr16-584945-DEL-156	chr16	560001	585000	0.447998	0.762647	0	0.568133	0	1.10094	0.818212	0	0	1.14994	0	0	0	0	1.4313	0	0	0	0	0	0.680795	1.38671	0	0.931062	0	0	1.38588	16	0.172441	0.172441
chr16	665215	665264	chr16-665215-DEL-50	chr16	650001	675000	0.674311	1.56644	1.51768	1.38785	1.94849	1.52444	1.5197	1.07097	1.33335	1.59807	0	0	1.4329	1.94827	2.27672	2.48682	1.39732	0	0	0	0	1.50399	1.81452	2.59882	1.65679	0	0	8	0.258462	0.258462
chr16	826628	826958	chr16-826628-DEL-331	chr16	805001	830000	0.948286	1.70899	1.87379	1.82846	2.50017	2.09291	1.78862	2.07488	1.55556	1.7811	2.42508	2.28702	2.14362	1.93121	1.76501	2.01977	2.31838	2.00224	1.63156	1.91505	1.87871	1.58198	1.84721	2.12002	1.76762	2.24062	1.70962	0	0.240923	0.240923
chr16	1340070	1340133	chr16-1340070-DEL-64	chr16	1330001	1355000	0.201631	0	0	0	0	0	0	0	0	0	0	0	0	0	0	0	0	0	0	0	0	0	0.368812	0	0	0	0	25	0.849089	0.849089
chr16	1761538	1761624	chr16-1761538-DEL-87	chr16	1760001	1785000	0.470747	0.704753	0.660791	1.19709	0.696776	0.700546	0.554453	0	0.492526	1.00497	0.246206	1.03871	0.430529	0.679984	1.67283	1.15298	0.748413	0.370152	0.661759	0.642832	1.25534	0.678547	0.913849	0	0.81347	0.789577	0.739287	2	0.0351657	0.0351657
chr16	2164718	2164840	chr16-2164718-DEL-123	chr16	2140001	2165000	1.0012	1.73451	1.54141	1.55758	1.19139	1.2914	1.38873	1.28255	1.52163	2.41338	0.692239	0.871926	1.13811	1.18824	2.96115	1.4579	0	2.23914	2.17548	1.42771	1.05991	0	1.71086	0	2.11143	1.12184	0	4	0.474227	0.474227
chr16	2345483	2345660	chr16-2345483-DEL-178	chr16	2325001	2350000	0.46282	0	0.584574	0	0	0	0	0.771924	0	0.450868	0	0	0	0.62992	0	0	0	0.623519	0	0.574301	0	0	0	0.760386	0.684377	0	0	18	0.744473	0.744473
chr16	2668493	2668542	chr16-2668493-DEL-50	chr16	2665001	2690000	0.95134	0	0	1.77756	1.29565	1.15975	0	1.80449	0	1.8542	2.71161	0	0	0	0	0	7.20548	0	2.50022	0	0	0	0	0	0	1.37049	1.85279	16	0.367011	0.367011
chr16	3469231	3469325	chr16-3469231-DEL-95	chr16	3450001	3475000	0.314004	0	0	0	0	0	0	0	0	0	0	0	0	0	0	0	0.977163	0	0	0	0	0	0	1.25768	0	0	0	24	0.65868	0.65868
chr16	3469538	3469632	chr16-3469538-DEL-95	chr16	3450001	3475000	0.314004	0	0	0	0	0	0	0	0	0	0	0	0	0	0	0	0.977163	0	0	0	0	0	0	1.25768	0	0	0	24	0.874078	0.874078
chr16	5249921	5250022	chr16-5249921-DEL-102	chr16	5230001	5255000	0.483228	0.720409	0.584707	0.964339	0.642944	0.862667	0.764063	1.48166	0.723078	0.984191	0.782887	0.55591	0.842633	1.1495	1.46137	1.12698	0.616672	0.875122	0.943721	1.06947	0.903899	0.900244	1.12833	2.46717	0.677399	0	0.65042	1	0.65868	0.65868
chr16	8661429	8662991	chr16-8661429-DEL-1563	chr16	8660001	8685000	0.275485	0	1.02154	0.851513	0.809457	0.459078	0	0.62028	1.05913	0.728746	0.699364	0.494726	0.519913	0.890143	0.867188	0.682909	0	1.15978	1.11123	0	0.375006	1.08786	1.07412	0	1.1536	0.796184	1.17119	5	0.384162	0.384162
chr16	10519579	10519634	chr16-10519579-DEL-56	chr16	10500001	10525000	1.02171	1.51065	2.0277	1.99182	2.32423	2.22278	1.82914	1.76078	2.04118	2.24629	1.86311	2.04961	1.92555	2.19952	1.86153	2.49981	1.9574	1.60418	2.33964	1.77274	1.75069	2.04477	1.98489	2.32104	2.43403	1.64009	2.39088	0	0.355123	0.355123
chr16	11375110	11375574	chr16-11375110-DEL-465	chr16	11375001	11400000	1.06985	1.73372	1.96297	2.01219	2.17696	2.17036	2.10209	1.66303	1.95925	2.11198	1.90513	2.1972	1.83156	1.82617	1.98016	2.27303	2.43969	1.94365	1.87537	2.06116	1.8472	2.07631	1.92532	1.98371	2.24107	1.85363	2.19535	0	0.764841	0.764841
chr16	11908463	11908787	chr16-11908463-DEL-325	chr16	11905001	11930000	0.705803	1.72601	1.57705	0	1.38228	0.985908	0	1.40933	0	1.30123	1.15897	1.31212	1.14284	1.0339	0	1.17414	1.43075	1.08777	0	1.17582	0	0	0.92983	1.65917	0	0.885817	0.705561	8	0.324397	0.324397
chr16	16840507	16846557	chr16-16840507-DEL-6051	chr16	16845001	16870000	0.316878	0	0.852868	0	0	0	0	0	0.750079	0	0	0.436916	0	0.637519	0.977233	0.34902	0	0.626602	0	0.733722	0.462027	1.30787	0.631225	0.645883	0	0	0	14	0.921476	0.921476
chr16	17132482	17132536	chr16-17132482-DEL-55	chr16	17125001	17150000	0.201926	0	0	0	0	0	0	0.500683	0	0	0	0	0	0	0	0	0	0	0	0	0	0.292736	0	0	0	0	0.36034	23	0.451781	0.451781
chr16	17143737	17143793	chr16-17143737-DEL-57	chr16	17125001	17150000	0.201926	0	0	0	0	0	0	0.500683	0	0	0	0	0	0	0	0	0	0	0	0	0	0.292736	0	0	0	0	0.36034	23	0.935022	0.935022
chr16	22695851	22695973	chr16-22695851-DEL-123	chr16	22680001	22705000	0.550632	0	0.188384	1.00695	0.905909	0.467026	0	0.37611	0.643746	0.850757	0	0.874633	1.17152	1.42612	0.816735	1.30608	0.806007	0.895534	0.342811	0.444361	0.479464	1.14116	0	0.72671	0.745132	0.729914	0.624409	4	0.431892	0.431892
chr16	22699431	22699849	chr16-22699431-DEL-419	chr16	22680001	22705000	0.550632	0	0.188384	1.00695	0.905909	0.467026	0	0.37611	0.643746	0.850757	0	0.874633	1.17152	1.42612	0.816735	1.30608	0.806007	0.895534	0.342811	0.444361	0.479464	1.14116	0	0.72671	0.745132	0.729914	0.624409	4	0.149647	0.149647
chr16	23439136	23439281	chr16-23439136-DEL-146	chr16	23430001	23455000	0.836317	1.86082	1.85571	1.25027	1.48351	1.50744	0.991345	1.44022	1.55161	1.41671	0.914187	1.2716	1.31581	1.46763	1.08343	1.72203	1.17198	1.50634	1.26687	1.7675	1.36035	1.55835	1.41508	1.53459	1.21066	1.05282	1.64442	0	0.0846298	0.0846298
chr16	23798147	23798205	chr16-23798147-DEL-59	chr16	23785001	23810000	0.816921	2.12877	1.9117	1.36719	1.54923	1.48314	1.95102	1.57024	1.67985	1.35856	1.87302	1.28337	1.2728	1.51536	1.67855	1.39542	2.16064	1.35711	1.40598	1.68883	1.16478	1.64461	1.37129	1.57634	1.13209	1.18822	1.36856	0	0.106683	0.106683
chr16	24049398	24049505	chr16-24049398-DEL-108	chr16	24025001	24050000	0.766532	1.87017	1.67714	1.15773	1.53169	1.71547	1.39175	1.59118	1.74008	1.86006	1.59691	1.79752	1.64935	1.62408	1.99596	1.48775	1.49596	1.66103	1.71569	1.66208	1.2893	1.95682	1.63786	1.50253	2.08245	1.49475	2.21624	0	0.483794	0.483794
chr16	24574339	24574458	chr16-24574339-DEL-120	chr16	24565001	24590000	0.246053	0	0	0	0	0	0	0	0.505572	0.597238	0.465783	0	0	0	0.688075	0	0	0	0	0	0.302424	0	0	0.601128	0	0	0	20	0.97831	0.97831
chr16	24574501	24574776	chr16-24574501-DEL-276	chr16	24565001	24590000	0.246053	0	0	0	0	0	0	0	0.505572	0.597238	0.465783	0	0	0	0.688075	0	0	0	0	0	0.302424	0	0	0.601128	0	0	0	20	0.479323	0.479323
chr16	27138848	27138897	chr16-27138848-DEL-50	chr16	27130001	27155000	0.435782	0.840855	1.18885	0.930831	0.713795	1.06128	0.82833	0.776773	1.16917	0.662484	1.23475	0.810021	0.575679	1.09645	1.01607	1.11333	1.49143	0.797357	0.724167	1.08871	0.943258	0.860163	0	0	0.922764	1.0587	1.30607	2	0.119502	0.119502
chr16	27228496	27228551	chr16-27228496-DEL-56	chr16	27220001	27245000	0.365944	0	0	0	0	0	0	0	0	0.745082	0	0	0	0.400183	0	0.407734	0	0	0	0.573434	0	0.800229	0	0	0.803915	0	0.657605	19	0.878479	0.878479
chr16	28993998	28994434	chr16-28993998-DEL-437	chr16	28990001	29015000	0.95662	0	0	0	0	0	0	0	0	0	0	0	0	1.27537	0	2.21367	0	0	0	0	0	0	0	0	0	0	0	24	0.744473	0.744473
chr16	31104644	31104721	chr16-31104644-DEL-78	chr16	31080001	31105000	0.378684	0	0.508156	0	0.428524	0.327035	0.520492	0	0	0	0.454176	0.344509	0.512651	0	0.59606	0.695849	0.695487	0.535203	0	0	0.485505	0.536395	0	0	0.363371	0.647708	0.426203	10	0.168349	0.168349
chr16	34102604	34102773	chr16-34102604-DEL-170	chr16	34090001	34115000	0.402725	0	0.255051	0	0	0	0	0	0	0	0	0	0	0.40376	0	0	0	0	0	0	0.826338	0.432221	0	0	0	0	0	22	0.340134	0.340134
chr16	46945716	46945772	chr16-46945716-DEL-57	chr16	46930001	46955000	1.23713	2.03641	2.29461	2.43394	2.54146	2.34473	2.15216	1.64294	2.5197	2.43106	2.29766	2.37484	2.09018	2.32744	2.00528	2.57714	2.04008	2.40093	2.33085	2.41675	2.25759	2.81189	2.32887	2.31711	2.61925	2.27867	2.76342	0	0.181451	0.181451
chr16	49506408	49506541	chr16-49506408-DEL-134	chr16	49490001	49515000	0.318771	0.405313	0.7305	0.650032	0.395685	0.57115	0.612935	0.713008	0.307648	0.506224	0.158171	0.677457	0.67062	0.58601	0.532735	0.529876	0.386754	0.384346	0.547588	0.327746	0.746957	0.603883	0.270914	0.934999	0.600335	0.489418	0	1	0.181451	0.181451
chr16	52024925	52024978	chr16-52024925-DEL-54	chr16	52000001	52025000	0.353968	0	0	0	0	0.354363	0.50165	0.32939	0.180624	0.73906	0.519853	0	0	0.816392	0.829913	0.471918	0.585585	0.558106	0.494896	0	0	0	0.603352	0.592329	0.709977	0	0.667814	10	0.762311	0.762311
chr16	55773565	55776428	chr16-55773565-DEL-2864	chr16	55765001	55790000	1.13192	0	0	0.619758	0	0	0	0	0	0	0	0	0.713174	0	0	0	0	0	0.552908	0	0	0	0	0	0	0	0	23	0.613969	0.613969
chr16	56568206	56568257	chr16-56568206-DEL-52	chr16	56565001	56590000	0.348264	0.592465	0.648789	0	0.50576	0.710237	0.773189	0	0.5084	0.782104	0.558618	0	0	0	0.410424	0.390165	0.594688	0.562163	0.665156	0.892876	0.570104	0.311768	0	0.34301	0.545428	0.834197	1.26343	6	0.39464	0.39464
chr16	56583114	56583447	chr16-56583114-DEL-334	chr16	56565001	56590000	0.348264	0.592465	0.648789	0	0.50576	0.710237	0.773189	0	0.5084	0.782104	0.558618	0	0	0	0.410424	0.390165	0.594688	0.562163	0.665156	0.892876	0.570104	0.311768	0	0.34301	0.545428	0.834197	1.26343	6	0.648462	0.648462
chr16	57292499	57294246	chr16-57292499-DEL-1748	chr16	57285001	57310000	1.09285	1.32907	1.46524	1.50546	1.66981	1.78999	1.42975	1.50343	1.6714	1.59364	1.85461	1.46703	1.25433	1.74299	1.61076	1.75674	2.0624	1.12894	1.43093	1.61367	1.48111	1.73272	1.19657	1.25322	1.93009	1.60141	1.35692	0	0.878479	0.878479
chr16	57745295	57745344	chr16-57745295-DEL-50	chr16	57735001	57760000	0.522564	0.897565	1.03387	0.624044	0.830767	1.06131	1.18531	1.34927	0.976575	1.17166	0.922878	0.956554	0.918056	1.24554	0.724094	1.02465	1.17899	1.13563	1.18059	0.987816	0.980713	1.48947	0.860899	0	1.22842	1.29832	0.999893	1	0.301538	0.301538
chr16	58119774	58119849	chr16-58119774-DEL-76	chr16	58115001	58140000	0.553053	1.00407	1.09195	1.53265	0.871016	1.02745	1.00272	0	1.22969	1.50066	0	0.548428	0	1.21014	0.982166	0	0.284354	0.828958	0.769779	1.26848	0.732621	1.15244	0.799215	1.06994	0.661659	0.841481	0.634444	4	0.278352	0.278352
chr16	58639909	58643409	chr16-58639909-DEL-3501	chr16	58620001	58645000	0.528276	1.1597	1.3717	1.34913	1.41449	0	1.06558	0	1.27058	0.960386	0	1.00376	0.91958	0	0	1.57383	1.32273	0.947963	0	0	1.11819	1.23103	0	0	0.962947	0.955686	0	10	0.0828611	0.0828611
chr16	58767007	58767062	chr16-58767007-DEL-56	chr16	58765001	58790000	0.547284	1.72661	0	1.42583	1.59634	1.82326	1.51511	0	1.77459	1.52392	1.48544	1.76291	1.24019	1.49079	1.40416	1.58938	1.97136	1.51003	1.0157	1.6343	1.73749	1.51666	1.52919	2.04279	1.67745	1.51461	1.4752	2	0.395807	0.395807
chr16	58785655	58785729	chr16-58785655-DEL-75	chr16	58765001	58790000	0.547284	1.72661	0	1.42583	1.59634	1.82326	1.51511	0	1.77459	1.52392	1.48544	1.76291	1.24019	1.49079	1.40416	1.58938	1.97136	1.51003	1.0157	1.6343	1.73749	1.51666	1.52919	2.04279	1.67745	1.51461	1.4752	2	0.431892	0.431892
chr16	65129016	65129082	chr16-65129016-DEL-67	chr16	65120001	65145000	0.21627	0.395982	0.356627	0	0.404898	0.282374	0	0	0	0.426723	0.0908709	0.734103	0	0.459001	0.642946	0	0.659452	0.32858	0.552346	0.274858	0	0.678524	0	0.738778	0.238769	0.221768	0.595648	8	0.384615	0.384615
chr16	67479903	67480220	chr16-67479903-DEL-318	chr16	67465001	67490000	0.884989	0.776304	0.681855	0.850713	0.944842	0.644523	0.756229	0.573635	1.08945	0.857913	1.46101	0.722611	0.800944	0.820664	0.659914	1.28024	0.842513	0.699206	0.75352	0.883712	0.369786	0.681704	0.556871	0.407584	0.764711	1.01603	1.21887	0	0.897126	0.897126
chr16	70169165	70169226	chr16-70169165-DEL-62	chr16	70155001	70180000	0.301693	0	1.99312	3.51281	0	0	0	1.87696	0	0	2.63749	0	0	0	3.09342	2.18856	1.75092	0	0	0	0	0	0	0	0	0	2.31862	18	0.498462	0.498462
chr16	70519107	70519426	chr16-70519107-DEL-320	chr16	70510001	70535000	0.483678	0	0	0	0	0	0.966358	0	0	0	0	0.553724	0.432323	0	0	0	0	0	0.553781	0.763181	0	0	0	0	0.871071	0	0	20	0.373883	0.373883
chr16	75395934	75396775	chr16-75395934-DEL-842	chr16	75385001	75410000	0.722085	1.64094	1.63532	1.68538	1.64794	1.72497	1.70441	1.73554	1.69735	1.59456	1.56928	1.53078	1.1703	0	0	1.50497	1.58609	1.45828	1.53969	0	1.65871	1.70653	1.4212	1.28452	1.76399	1.51533	1.82894	3	0.918261	0.918261
chr16	81517204	81517296	chr16-81517204-DEL-93	chr16	81515001	81540000	0.34304	0	0.721182	0	0.764316	0.503534	0.481598	0	0.501274	0.990689	0.928497	0.546786	0.640409	0	0.790965	0.492134	0.801483	0	0.535125	0.520658	0.587736	0.588001	0.509327	0.243805	0.579065	0	0.337242	6	0.683178	0.683178
chr16	83950288	83950467	chr16-83950288-DEL-180	chr16	83935001	83960000	0.354939	0.916298	0	0.861508	0	0	0	1.15688	1.24579	1.13368	1.02039	0	1.2171	1.3228	1.72433	1.60245	1.12303	1.05439	1.14091	0.932405	1.44186	1.71368	1.05753	1.14274	1.19397	1.12397	1.33731	5	0.569474	0.569474
chr16	85115882	85116469	chr16-85115882-DEL-588	chr16	85095001	85120000	0.607167	1.13064	1.14399	0.930935	1.63856	1.69253	1.27283	0.911117	1.42144	1.42992	0.794965	1.10502	1.01231	1.57899	0	1.15127	1.47411	1.77748	1.28261	1.30091	1.49747	1.65375	1.33547	1.48517	1.79587	1.37639	1.31708	1	0.82009	0.82009
chr16	85404165	85404297	chr16-85404165-DEL-133	chr16	85390001	85415000	0.383395	0.613892	0.642961	0	0.353926	0	0.737388	0	0.676796	0.539675	0.595567	0	0	0.505378	0	0	0	0.647044	0	0.612869	0	0	0.755897	0	0	0.924748	0.945005	13	0.0972623	0.0972623
chr16	85405152	85405249	chr16-85405152-DEL-98	chr16	85390001	85415000	0.383395	0.613892	0.642961	0	0.353926	0	0.737388	0	0.676796	0.539675	0.595567	0	0	0.505378	0	0	0	0.647044	0	0.612869	0	0	0.755897	0	0	0.924748	0.945005	13	0.122911	0.22763
chr16	85405152	85405249	chr16-85405152-DEL-98	chr16	85405001	85430000	0.383395	0.613892	0.642961	0.608367	0.353926	0	0.737388	0.437035	0.676796	0.539675	0.595567	0.612232	0.947684	0.505378	0	0.54528	0	0.647044	0	0.612869	0.392319	0	0.755897	0	0	0	0.945005	8	0.22763	0.22763
chr16	85552274	85552580	chr16-85552274-DEL-307	chr16	85530001	85555000	0.220711	0	0.620764	0.141764	0	0	0	0.490751	0	0	0	0.282258	0	0	0	0	0	0.8597	0.455237	0	0	0	0	0.718947	0	0	0	19	0.704615	0.704615
chr16	87671597	87671648	chr16-87671597-DEL-52	chr16	87650001	87675000	0.295112	0	0.668432	0	0.518433	0.579726	0.566744	0.434049	0.914674	1.13338	0.611287	0.701255	0.880207	0.805582	0	0.663125	0.756257	0.823771	0.842715	0.729639	0.759728	0.743125	0	0	0.565758	0.501962	0.899097	5	0.865552	0.865552
chr16	87948194	87948247	chr16-87948194-DEL-54	chr16	87940001	87965000	0.71809	1.00152	0.915701	1.29446	1.22742	0	1.1234	1.54053	1.06652	1.26581	1.15398	1.3124	1.54555	1.40675	0	1.2272	0	0	0.771192	1.2394	0	1.52027	0	0.69651	1.33533	1.49434	1.33038	6	0.45703	0.45703
chr16	88423105	88423183	chr16-88423105-DEL-79	chr16	88420001	88445000	0.926234	1.96518	2.36565	2.19511	1.994	2.41976	2.07443	2.26368	2.47199	1.42126	2.31689	2.66228	2.45461	2.40529	1.58737	1.91632	2.82022	1.74672	2.12169	2.09481	0	2.44733	1.7658	2.32906	1.79417	2.40127	1.99818	1	0.648462	0.648462
chr16	88558411	88558469	chr16-88558411-DEL-59	chr16	88555001	88580000	0.670348	1.18463	1.12107	1.44489	1.89301	1.60812	1.02153	1.72522	1.74055	1.40539	1.34303	1.46804	1.48173	1.66544	1.28169	1.50699	1.57516	1.22258	1.2357	1.43883	0	1.60095	1.24351	1.2147	1.30441	1.39243	1.33754	1	0.955002	0.955002
chr16	88796244	88797188	chr16-88796244-DEL-945	chr16	88795001	88820000	0.762469	0.865971	1.16652	1.07087	0.898546	1.59679	1.2676	1.67698	1.56357	1.55859	1.13584	1.49251	1.69388	1.67262	0.886583	0	0	0.895702	1.08939	0.83536	0.806914	2.05005	1.23222	0.875439	1.51281	1.22361	1.81977	2	0.023693	0.023693
chr16	88933253	88933630	chr16-88933253-DEL-378	chr16	88925001	88950000	0.478532	1.34452	0.779476	0.662351	0	0.85825	1.01971	1.01664	1.18961	1.46948	0.805145	1.04246	0.706659	0.776658	1.57541	1.42424	0.839077	0.808448	0.975805	1.10776	1.63957	1.36852	1.0828	0	0.778881	1.10419	0.549985	2	0.461317	0.461317
chr16	88933253	88933315	chr16-88933253-DEL-63	chr16	88925001	88950000	0.478532	1.34452	0.779476	0.662351	0	0.85825	1.01971	1.01664	1.18961	1.46948	0.805145	1.04246	0.706659	0.776658	1.57541	1.42424	0.839077	0.808448	0.975805	1.10776	1.63957	1.36852	1.0828	0	0.778881	1.10419	0.549985	2	0.910143	0.910143
chr16	89160397	89160465	chr16-89160397-DEL-69	chr16	89155001	89180000	0.545888	1.3265	0.688988	0.901179	0.772347	0	0	0.397405	0	0	0.321546	1.12823	0	0	0.950371	0	1.64914	0	0.68595	0	0.667998	0.847002	0.774142	0.584061	0.520178	0	0	11	1	1
chr16	89165868	89166183	chr16-89165868-DEL-316	chr16	89155001	89180000	0.545888	1.3265	0.688988	0.901179	0.772347	0	0	0.397405	0	0	0.321546	1.12823	0	0	0.950371	0	1.64914	0	0.68595	0	0.667998	0.847002	0.774142	0.584061	0.520178	0	0	11	0.865552	0.865552
chr16	89166514	89166673	chr16-89166514-DEL-160	chr16	89155001	89180000	0.545888	1.3265	0.688988	0.901179	0.772347	0	0	0.397405	0	0	0.321546	1.12823	0	0	0.950371	0	1.64914	0	0.68595	0	0.667998	0.847002	0.774142	0.584061	0.520178	0	0	11	0.448301	0.448301
chr16	89229475	89229526	chr16-89229475-DEL-52	chr16	89225001	89250000	0.453853	0.686449	0.356321	0.904608	0.991154	1.15823	1.12926	0.616711	0.889213	0	0.956188	0	0	1.03854	0.554344	0	0	0	0.337054	1.5051	0.737247	0	0	0.873873	0.652751	0.424248	1.19796	8	0.0201601	0.0201601
chr16	89241044	89241103	chr16-89241044-DEL-60	chr16	89225001	89250000	0.453853	0.686449	0.356321	0.904608	0.991154	1.15823	1.12926	0.616711	0.889213	0	0.956188	0	0	1.03854	0.554344	0	0	0	0.337054	1.5051	0.737247	0	0	0.873873	0.652751	0.424248	1.19796	8	0.910143	0.910143
chr16	89241044	89241193	chr16-89241044-DEL-150	chr16	89225001	89250000	0.453853	0.686449	0.356321	0.904608	0.991154	1.15823	1.12926	0.616711	0.889213	0	0.956188	0	0	1.03854	0.554344	0	0	0	0.337054	1.5051	0.737247	0	0	0.873873	0.652751	0.424248	1.19796	8	0.134106	0.134106
chr16	89323546	89323605	chr16-89323546-DEL-60	chr16	89300001	89325000	0.441269	0.838308	0.715631	0.691603	0	0.943743	1.20763	0.554416	0.838711	0.63801	0.878328	0.795547	0.646064	0.975528	0	0	0.747437	0.84455	0.763986	1.07148	0.81555	0.662505	0.73421	0	0.804804	0	0.520145	5	0.486136	0.486136
chr16	89421266	89421640	chr16-89421266-DEL-375	chr16	89410001	89435000	0.242913	0	0	0.831663	0	0.323587	0.538643	0.350847	0.622663	0	0	0	0	0	0.435129	0	0	0	0	0	0	0	0.309544	0	0.156108	0	0	18	0.431892	0.431892
chr16	89421266	89421415	chr16-89421266-DEL-150	chr16	89410001	89435000	0.242913	0	0	0.831663	0	0.323587	0.538643	0.350847	0.622663	0	0	0	0	0	0.435129	0	0	0	0	0	0	0	0.309544	0	0.156108	0	0	18	0.959358	0.959358
chr16	89429173	89429886	chr16-89429173-DEL-714	chr16	89410001	89435000	0.242913	0	0	0.831663	0	0.323587	0.538643	0.350847	0.622663	0	0	0	0	0	0.435129	0	0	0	0	0	0	0	0.309544	0	0.156108	0	0	18	0.498462	0.498462
chr16	89686257	89686311	chr16-89686257-DEL-55	chr16	89685001	89710000	0.640155	1.12249	1.67567	1.4161	1.64802	1.53748	1.56488	1.28326	1.50177	1.49371	1.78624	1.45203	1.11203	0	1.43475	0	1.59033	1.65279	1.23751	1.59395	2.14856	1.34852	1.54231	1.30569	1.54929	1.20041	1.58555	2	0.613408	0.613408
chr16	89879416	89879625	chr16-89879416-DEL-210	chr16	89860001	89885000	0.728106	1.11036	1.23809	0.950409	0.813465	0.964902	0.843625	0.638532	0	0.815603	0	0.976038	1.16456	1.50015	1.85114	1.47844	0.924715	0.908612	1.06218	0.95957	1.13722	1.19132	0.903239	1.10024	1.03276	0.814025	1.23006	2	0.177592	0.177592
chr16	89879458	89879541	chr16-89879458-DEL-84	chr16	89860001	89885000	0.728106	1.11036	1.23809	0.950409	0.813465	0.964902	0.843625	0.638532	0	0.815603	0	0.976038	1.16456	1.50015	1.85114	1.47844	0.924715	0.908612	1.06218	0.95957	1.13722	1.19132	0.903239	1.10024	1.03276	0.814025	1.23006	2	0.219796	0.219796
chr16	90052568	90052707	chr16-90052568-DEL-140	chr16	90045001	90070000	1.56291	0	0	0.0778092	0.336085	0	0.652167	0	0	0	0.676637	0	0	0	0	0	0	0	0	0	0.0912409	0	0	0	0	0	0	21	0.200535	0.200535
chr17	295359	295413	chr17-295359-DEL-55	chr17	295001	320000	0.223573	0	0	0	0	0	0	0	0	0	0	0	0.686489	0.715923	0.683046	0.613378	0	0	0	0	0.374968	0	0.300119	0.684503	0	0	0	19	0.553846	0.553846
chr17	299991	300178	chr17-299991-DEL-188	chr17	295001	320000	0.223573	0	0	0	0	0	0	0	0	0	0	0	0.686489	0.715923	0.683046	0.613378	0	0	0	0	0.374968	0	0.300119	0.684503	0	0	0	19	0.656457	0.656457
chr17	300101	300332	chr17-300101-DEL-232	chr17	295001	320000	0.223573	0	0	0	0	0	0	0	0	0	0	0	0.686489	0.715923	0.683046	0.613378	0	0	0	0	0.374968	0	0.300119	0.684503	0	0	0	19	0.672262	0.672262
chr17	300474	300564	chr17-300474-DEL-91	chr17	295001	320000	0.223573	0	0	0	0	0	0	0	0	0	0	0	0.686489	0.715923	0.683046	0.613378	0	0	0	0	0.374968	0	0.300119	0.684503	0	0	0	19	0.646084	0.646084
chr17	307195	307418	chr17-307195-DEL-224	chr17	295001	320000	0.223573	0	0	0	0	0	0	0	0	0	0	0	0.686489	0.715923	0.683046	0.613378	0	0	0	0	0.374968	0	0.300119	0.684503	0	0	0	19	0.128523	0.128523
chr17	790636	790802	chr17-790636-DEL-167	chr17	780001	805000	0.606732	0.670087	0.707349	1.33433	1.29971	1.23914	0.89993	0.717753	1.26926	1.43281	1.08497	0.898109	0.589524	0.972183	0	1.2915	1.54766	0.978436	0.927747	0.950188	1.02483	1.8364	0.676329	0.942855	0.993071	1.38324	1.20745	1	0.409486	0.409486
chr17	1062192	1063260	chr17-1062192-DEL-1069	chr17	1060001	1085000	0.519434	1.18523	0.594289	0	0	0.958292	0.805095	0	1.03916	0	0	0	0	0	0	0	0	0	0	0	0	0	0	0	0	0	0	21	0.130844	0.130844
chr17	1063868	1064248	chr17-1063868-DEL-381	chr17	1060001	1085000	0.519434	1.18523	0.594289	0	0	0.958292	0.805095	0	1.03916	0	0	0	0	0	0	0	0	0	0	0	0	0	0	0	0	0	0	21	0.149647	0.149647
chr17	1064580	1065485	chr17-1064580-DEL-906	chr17	1060001	1085000	0.519434	1.18523	0.594289	0	0	0.958292	0.805095	0	1.03916	0	0	0	0	0	0	0	0	0	0	0	0	0	0	0	0	0	0	21	0.149647	0.149647
chr17	1194457	1194911	chr17-1194457-DEL-455	chr17	1180001	1205000	0.405231	0	0.545528	0.70348	0	0.692176	0	0	0	0	0	0	0	0	1.05756	0.654436	0	0	0	0	0	0	0	0	0	0	0.823021	20	0.51694	0.51694
chr17	1250041	1250256	chr17-1250041-DEL-216	chr17	1245001	1270000	0.706386	1.34282	1.25504	1.29783	0.715037	1.49645	1.01687	0.829139	1.24649	1.48026	0	1.1659	0.790029	0.861072	1.79146	0.864186	1.47592	1.03523	1.00249	1.10592	0.772473	1.56557	0.798232	0.816267	1.28676	0.990514	1.42262	1	0.374396	0.374396
chr17	1250041	1250112	chr17-1250041-DEL-72	chr17	1245001	1270000	0.706386	1.34282	1.25504	1.29783	0.715037	1.49645	1.01687	0.829139	1.24649	1.48026	0	1.1659	0.790029	0.861072	1.79146	0.864186	1.47592	1.03523	1.00249	1.10592	0.772473	1.56557	0.798232	0.816267	1.28676	0.990514	1.42262	1	0.51694	0.51694
chr17	1549485	1549841	chr17-1549485-DEL-357	chr17	1545001	1570000	0.94044	0	1.27807	0	0	1.84562	1.52709	0	1.55867	0	1.65334	1.66959	0	0	1.61179	1.48018	1.79803	1.73666	0	0	0	1.59584	0	1.66811	1.69208	0	0	13	0.305786	0.305786
chr17	1551006	1551058	chr17-1551006-DEL-53	chr17	1545001	1570000	0.94044	0	1.27807	0	0	1.84562	1.52709	0	1.55867	0	1.65334	1.66959	0	0	1.61179	1.48018	1.79803	1.73666	0	0	0	1.59584	0	1.66811	1.69208	0	0	13	0.744473	0.744473
chr17	2052378	2052657	chr17-2052378-DEL-280	chr17	2035001	2060000	1.64828	2.72506	2.85055	2.9916	3.27643	2.73391	2.93367	2.52486	2.54961	2.91453	2.824	3.05585	2.80292	2.77978	2.60859	2.8735	2.77387	3.07487	3.30895	2.9873	2.87362	3.53426	2.39955	2.86391	3.35323	2.45706	2.5627	0	0.418413	0.418413
chr17	2052508	2052927	chr17-2052508-DEL-420	chr17	2035001	2060000	1.64828	2.72506	2.85055	2.9916	3.27643	2.73391	2.93367	2.52486	2.54961	2.91453	2.824	3.05585	2.80292	2.77978	2.60859	2.8735	2.77387	3.07487	3.30895	2.9873	2.87362	3.53426	2.39955	2.86391	3.35323	2.45706	2.5627	0	0.120365	0.120365
chr17	2291627	2291761	chr17-2291627-DEL-135	chr17	2285001	2310000	0.504086	0	0.780026	0	0.729614	0	1.03714	0.761268	1.21712	0	0.965966	0.438927	0.818379	0.493745	1.34584	0.798192	1.06813	0.61875	0	1.18956	0	0.482101	0.945353	0	0.816843	0	0.340657	8	0.25035	0.25035
chr17	3831491	3832548	chr17-3831491-DEL-1058	chr17	3830001	3855000	0.768706	2.11947	2.19112	1.57892	2.30086	1.78646	1.72114	1.58985	2.43546	1.2789	1.51247	2.00608	1.74377	1.94383	1.90252	1.5311	2.31018	2.09263	1.74783	2.17813	1.92772	2.27065	1.87425	2.12813	1.71552	1.83799	2.03506	0	1	1
chr17	4191602	4191953	chr17-4191602-DEL-352	chr17	4175001	4200000	0.324209	1.3349	0	0.867352	0.968121	0.801363	0.619356	0.978398	0.897345	0.828964	0.975371	0	0	0.802166	1.38169	0.967832	0	0.961348	0	0	0.625559	1.26135	0.658842	0.772467	1.02345	0.672196	1.03693	6	0.863946	0.863946
chr17	4714564	4714713	chr17-4714564-DEL-150	chr17	4690001	4715000	0.50109	1.23605	1.02464	1.35845	0.948896	1.19588	1.12807	0.901198	1.03222	1.08423	0.916226	0.989103	0.820836	0.802552	1.14141	1.19971	0.991571	0.844489	0.979313	0	0.854994	1.26913	1.25573	0	1.04549	0.921926	1.1032	2	0.320322	0.320322
chr17	4714564	4714613	chr17-4714564-DEL-50	chr17	4690001	4715000	0.50109	1.23605	1.02464	1.35845	0.948896	1.19588	1.12807	0.901198	1.03222	1.08423	0.916226	0.989103	0.820836	0.802552	1.14141	1.19971	0.991571	0.844489	0.979313	0	0.854994	1.26913	1.25573	0	1.04549	0.921926	1.1032	2	0.374417	0.374417
chr17	7205696	7205752	chr17-7205696-DEL-57	chr17	7190001	7215000	0.539514	1.22387	1.34008	0.84775	1.40881	1.51893	1.37095	1.39966	1.19245	1.46617	1.53987	1.46474	1.07967	1.23845	1.19079	1.34151	1.41914	1.10712	1.14788	1.08679	1.2852	1.18258	1.29835	1.37576	0.883568	1.33257	1.01505	0	0.479323	0.479323
chr17	7433091	7434384	chr17-7433091-DEL-1294	chr17	7425001	7450000	0.29187	0	0.461217	0.31956	0.235744	0.78867	1.05416	0.866078	0.711484	0.458742	0	0	0.801947	0.330232	0	0.141161	0.606795	0.729432	0	0	0.398388	0	0	1.35165	0.855052	0.858161	0	9	0.224232	0.224232
chr17	8107810	8108043	chr17-8107810-DEL-234	chr17	8105001	8130000	0.907367	0.847844	0.622847	0	0.934495	0.585678	0.702833	0	1.45032	1.14549	0.599292	0.596749	0.984381	0.798961	0.927269	0.899178	0.907344	1.14242	0.627579	0.440456	0.373824	0.0117165	0.410948	0.296313	0.935239	0.341986	0.339522	2	0.935765	0.935765
chr17	8107871	8107965	chr17-8107871-DEL-95	chr17	8105001	8130000	0.907367	0.847844	0.622847	0	0.934495	0.585678	0.702833	0	1.45032	1.14549	0.599292	0.596749	0.984381	0.798961	0.927269	0.899178	0.907344	1.14242	0.627579	0.440456	0.373824	0.0117165	0.410948	0.296313	0.935239	0.341986	0.339522	2	0.328645	0.328645
chr17	8885622	8885802	chr17-8885622-DEL-181	chr17	8885001	8910000	0.572904	1.09057	0.743138	0.915177	0.834685	0.897277	0.747239	1.4435	0.91754	1.1604	0.666932	0.528897	0.842225	0.970251	1.11724	1.0673	0.912424	1.0008	0.804452	0.627838	0.644915	0.879837	1.31172	0.880968	0.857514	0.753157	1.10168	0	0.706488	0.706488
chr17	10300104	10300454	chr17-10300104-DEL-351	chr17	10280001	10305000	0.208421	0	0.388159	0.721404	0.531247	0.101213	0.223547	0.507107	0.19934	0.537573	0	0.325607	0.440504	0	0	0	0.388743	0.466823	0.60706	0.505867	0	0.169701	0.382295	0	0	0.408158	0	9	0.613969	0.613969
chr17	11972795	11972899	chr17-11972795-DEL-105	chr17	11965001	11990000	0.631174	0.979816	1.41555	1.29297	1.44354	1.13636	1.05698	1.45115	0.817334	1.63837	1.00802	1.38056	1.6834	0.720218	1.35193	0.941909	0	1.44256	1.0661	1.21956	0	1.54136	1.11227	1.48956	0.826576	1.07561	0.991575	2	0.915864	0.915864
chr17	14286594	14288238	chr17-14286594-DEL-1645	chr17	14285001	14310000	0.316247	0.398083	0.41006	0	1.15091	0.715376	0	0.952987	0	0	0.728695	0.889722	0.843903	0.480681	0.842806	0	1.07749	0.658735	0.41037	0.495369	0	0.673578	0	0.507834	1.21757	0	1.04919	8	0.75786	0.75786
chr17	17327061	17327936	chr17-17327061-DEL-876	chr17	17320001	17345000	0.931321	2.01523	2.23263	1.91583	2.10948	1.97968	1.86025	1.47658	2.04422	1.85081	2.41384	2.39175	2.00865	2.22074	1.99467	1.76169	1.88454	2.16616	1.83329	2.14088	1.96707	2.03528	1.83044	2.23589	1.92834	2.39468	2.89661	0	0.569474	0.569474
chr17	18366834	18368337	chr17-18366834-DEL-1504	chr17	18355001	18380000	0.214371	0	0	0	0	0	0	0	0	0	0	0.378732	0	0	0	0	0	0	0.984482	0	0	0	0	0	0	0	0	24	0.683178	0.683178
chr17	19506813	19507119	chr17-19506813-DEL-307	chr17	19495001	19520000	0.413785	0.938632	1.0351	0.901829	0.982397	1.25174	1.12018	1.26986	0.944616	1.41407	1.2161	1.01659	1.29186	1.09671	1.32594	0	0.861627	1.14817	1.16434	1.26875	1.06033	1.37635	1.08999	1.13951	1.03032	1.40852	1.05049	1	0.938176	0.938176
chr17	19640105	19640412	chr17-19640105-DEL-308	chr17	19630001	19655000	0.253324	0	0.713234	0.99883	0.644057	0.525945	0.273745	0.767356	0	0	0.165789	0.60387	0.617654	0.525323	0	0.577355	0.731106	0.626273	0.575447	0.806685	0	1.1352	0.699769	1.44946	0.776402	0.400126	0.684607	5	0.461538	0.461538
chr17	27165751	27165810	chr17-27165751-DEL-60	chr17	27160001	27185000	0.667737	0	0	0	0	0	0	0	0	1.18649	0	0	0	0.969146	0	0	0	1.39269	0	0	0	0	0	0	0	0	1.01605	22	0.595155	0.595155
chr17	30906013	30906092	chr17-30906013-DEL-80	chr17	30890001	30915000	0.504399	0.971838	1.13015	1.2359	0.750415	0.556803	0.470397	0.707514	0	0	0	0	0.695289	0	0	1.17779	1.22372	0.543927	0.774139	1.37245	1.23324	0.833087	0	0	0.654976	1.16915	0.755291	8	0.156539	0.156539
chr17	33006160	33006227	chr17-33006160-DEL-68	chr17	33000001	33025000	0.445784	1.09968	1.01177	1.06372	0.330879	0.623994	0	0.688468	0.287186	0.952796	1.01899	0.79626	0	0.942902	0	0.4002	1.00401	1.55938	0.628345	0.967348	0.528376	0.930749	1.0921	0	0.510174	0.664731	0	5	0.78101	0.78101
chr17	34157871	34157983	chr17-34157871-DEL-113	chr17	34155001	34180000	0.584893	1.6345	0	0.984443	1.52645	1.22962	0	1.31597	0.923133	0	1.31658	1.04996	1.2033	1.61624	1.03092	1.10242	0	0	1.73575	1.29549	0.731629	1.63056	1.45253	0	0	0	1.80719	8	0.0410155	0.0410155
chr17	34545963	34547596	chr17-34545963-DEL-1634	chr17	34530001	34555000	0.50412	0	1.03895	0.595974	0.737299	0.67197	0.665198	0	0.449094	0.773908	0	0.488427	0.565769	0.655612	0	0.684951	0.408536	0.951226	0.763649	0.759852	0.643213	0.859894	0.51424	0	0.765523	0	0.486226	6	0.384162	0.384162
chr17	37418846	37422300	chr17-37418846-DEL-3455	chr17	37395001	37420000	0.35494	0.287536	0.880018	0	0	0	0	0	0	0	0.385016	0	0	0	0.729286	0.864829	0	0.890722	0	0.376936	0.205312	0	0	0.678061	0	0	0	17	0.775995	0.775995
chr17	41227951	41239302	chr17-41227951-DEL-11352	chr17	41230001	41255000	0.246359	0	0	0	0.546755	0.386756	0	0	0.560817	0	0	0	0.313658	0	0	0.124897	0.629672	0	0	0.439119	0.370222	0.251068	0	0	0	0	0.169411	16	1	1
chr17	41235844	41235895	chr17-41235844-DEL-52	chr17	41230001	41255000	0.246359	0	0	0	0.546755	0.386756	0	0	0.560817	0	0	0	0.313658	0	0	0.124897	0.629672	0	0	0.439119	0.370222	0.251068	0	0	0	0	0.169411	16	0.285247	0.285247
chr17	41288742	41288854	chr17-41288742-DEL-113	chr17	41285001	41310000	0.338237	0.381823	0.399908	0	0	0	0.411904	0	0.992753	0	0	0	0	0	0.471304	0	0	0	0.717823	0	0	0	0	0.655991	0.396243	0	0	18	0.651177	0.651177
chr17	43360598	43362816	chr17-43360598-DEL-2219	chr17	43355001	43380000	0.721536	0.528056	0	0.866606	1.39619	0	0.562884	0	0.276416	0	0	0.91793	0	1.24462	0	0	0	0.820003	0	0	1.13117	0	0	0	1.73944	0	0	16	0.957876	0.957876
chr17	46009358	46009595	chr17-46009358-DEL-238	chr17	45985001	46010000	0.318456	0.785959	1.06069	1.16788	0.952478	1.02689	0	0.613672	0.697362	0	0.36031	0.939456	0	0.865094	0.495614	1.23772	0.964387	1.12662	0.625591	1.14372	0.575589	1.07794	0	0.916154	0.913932	0	1.14893	5	0.224232	0.224232
chr17	48342413	48342480	chr17-48342413-DEL-68	chr17	48330001	48355000	0.445665	0.935292	1.00068	0.906308	1.04559	1.41174	0.979607	0.76477	1.23492	1.07045	0.777837	1.19815	0.968615	1.07492	1.03016	1.12452	1.00664	1.28403	0.977754	1.21397	0.883889	1.2294	0.850176	0	0.855294	1.02384	1.12081	1	0.751153	0.751153
chr17	49569195	49569330	chr17-49569195-DEL-136	chr17	49555001	49580000	1.27683	2.62307	2.31536	2.50696	2.59424	2.57777	2.12842	1.85808	2.4045	2.29353	2.58999	2.44232	2.52466	1.99281	2.44351	2.48494	2.34742	2.4092	2.29373	2.39216	1.95921	3.3674	2.51197	2.12538	2.68027	2.3868	2.42939	0	0.301538	0.301538
chr17	50350143	50350526	chr17-50350143-DEL-384	chr17	50335001	50360000	0.390451	1.08148	1.03668	1.23553	1.19469	1.25913	1.12836	0	1.4596	1.16351	1.53293	1.02058	1.01492	1.1052	0	1.18949	1.43754	0.966988	1.313	1.18741	1.57631	0	1.18347	0	1.06957	1.35478	1.323	4	0.821365	0.821365
chr17	57131654	57132277	chr17-57131654-DEL-624	chr17	57110001	57135000	0.767843	1.54326	1.41367	1.54642	1.95667	1.72782	1.3708	1.30221	1.6358	1.68413	1.23485	1.69115	1.22725	1.25305	2.17988	1.55491	0	1.47994	1.55385	1.31161	1.61137	1.99958	1.98551	1.84313	1.66802	1.33067	1.91921	1	0.0294758	0.0294758
chr17	57846215	57846305	chr17-57846215-DEL-91	chr17	57835001	57860000	0.983644	1.41549	1.59758	1.907	1.80178	1.83092	1.71503	1.37986	1.91393	1.80779	1.70964	1.45383	1.68194	1.76146	1.52002	1.33073	2.22336	1.82104	1.49948	1.55034	1.88059	1.6798	1.41701	1.52401	1.92942	1.74635	1.95291	0	0.0107665	0.0107665
chr17	60042994	60043066	chr17-60042994-DEL-73	chr17	60025001	60050000	0.82541	0.701674	0	2.3781	0	0	0	0	2.02158	0	2.33756	0.931708	0.62474	1.64886	2.69461	0.8487	1.67786	1.04595	0	1.5979	1.30061	1.34237	2.02762	6.4584	0	0	0	10	0.705138	0.705138
chr17	64135820	64136791	chr17-64135820-DEL-972	chr17	64130001	64155000	1.50168	3.06832	2.633	2.43877	2.86611	2.95628	2.35095	2.13794	2.53721	3.0673	3.08144	2.63656	2.39474	2.96154	2.3878	2.54758	2.85296	2.71155	2.74539	2.80779	2.36918	3.34238	2.34422	3.12001	2.89615	2.53182	3.35602	0	0.918621	0.918621
chr17	64422082	64422356	chr17-64422082-DEL-275	chr17	64405001	64430000	1.0574	1.58274	1.87114	1.97601	2.12103	2.20735	1.94258	1.46275	1.58898	1.93325	1.4822	1.86349	2.00615	2.11627	1.53303	1.87522	2.53656	2.13599	1.87963	2.20463	2.20045	2.33785	1.85412	1.64906	2.15731	2.24443	1.94348	0	0.649848	0.649848
chr17	66562075	66562184	chr17-66562075-DEL-110	chr17	66555001	66580000	0.300887	0.834321	0	0.608783	0	0.539734	0.663183	0.923725	0.358655	0.360082	0.559697	0.690483	0.830504	0.649905	0.933911	0.407647	0.578767	0.570459	0.885783	0.545005	0.4179	0.601392	0.723935	0	0.592015	0.958861	0	4	0.762311	0.762311
chr17	68035451	68035507	chr17-68035451-DEL-57	chr17	68020001	68045000	0.333202	0.617179	0.669645	0.669787	0.674752	0.645505	0.89768	0.744559	0.952067	0.894913	0.443098	0.763606	0.659316	0.736483	1.35907	1.00566	1.09793	0.690045	0.706836	0.636126	0.647814	0.863535	0.753675	0	0.629576	0	0.719829	2	0.820769	0.820769
chr17	68958898	68958951	chr17-68958898-DEL-54	chr17	68945001	68970000	0.201112	0	0.363492	0	0	0.214077	0.492716	0.370767	0	0	0	0.20799	0.268697	0	0	0	0	0.503477	0	0	0	0	0.410948	0	0	0.399052	0.477533	16	0.801034	0.801034
chr17	68958898	68958951	chr17-68958898-DEL-54	chr17	68950001	68975000	0.201112	0	0.363492	0.599532	0.292188	0.214077	0.492716	0.370767	0.322651	0	0	0.20799	0.268697	0	0	0.296987	0	0.503477	0.406856	0.573923	0	0.447439	0.410948	0	0.829549	0.399052	0.477533	8	0.373883	0.801034
chr17	68958898	68958951	chr17-68958898-DEL-54	chr17	68935001	68960000	0.201112	0	0	0	0	0	0.492716	0	0	0	0	0	0.268697	0	0	0	0	0	0	0	0	0	0.410948	0.278037	0	0	0	22	0.569474	0.801034
chr17	68964786	68965118	chr17-68964786-DEL-333	chr17	68945001	68970000	0.201112	0	0.363492	0	0	0.214077	0.492716	0.370767	0	0	0	0.20799	0.268697	0	0	0	0	0.503477	0	0	0	0	0.410948	0	0	0.399052	0.477533	16	0.656054	0.656054
chr17	68964786	68965118	chr17-68964786-DEL-333	chr17	68950001	68975000	0.201112	0	0.363492	0.599532	0.292188	0.214077	0.492716	0.370767	0.322651	0	0	0.20799	0.268697	0	0	0.296987	0	0.503477	0.406856	0.573923	0	0.447439	0.410948	0	0.829549	0.399052	0.477533	8	0.0959197	0.191839
chr17	70163784	70164116	chr17-70163784-DEL-333	chr17	70155001	70180000	0.348659	0	0.740493	0.602925	0	0.842387	0	0.537963	0.447807	0.591202	0.662099	0.486019	0.260785	0.777131	0	0	0.825329	0.735868	0.526983	0	0.680488	1.00115	0.662951	0	0.546262	0.51471	0.784822	7	0.495435	0.495435
chr17	74301867	74302070	chr17-74301867-DEL-204	chr17	74280001	74305000	0.543056	1.00188	1.00647	0.519985	0.439433	0.69062	0.589431	0.699778	0	0.463502	0.155019	0.520947	0.228992	0.487178	0.407875	0.572548	0	0.870542	0.58463	0.829891	0.914599	1.26405	0.753164	0.848162	1.10209	0.305046	1.16796	2	0.918817	0.918817
chr17	74642958	74643092	chr17-74642958-DEL-135	chr17	74635001	74660000	0.460762	0.871743	0.907695	0.829686	1.30339	1.1861	0.739003	0.868575	0.811587	0.845903	0.882287	1.0613	0.590949	0.81556	1.17719	0.909376	1.32838	1.32409	1.05516	0.826671	0.8333	1.68642	1.24801	0	1.63515	0.998699	1.1333	1	0.237211	0.237211
chr17	75044188	75044504	chr17-75044188-DEL-317	chr17	75025001	75050000	0.438938	1.10193	0.85116	0.652014	1.11928	0.512487	0.579537	0.718165	0.765526	0.86764	1.06641	0.518283	0.767075	0.524675	0	0.44465	0.953376	0.739178	0.551836	0.600304	0.730047	1.31693	0.388367	0.531499	0.664864	0.628639	0.83121	1	0.879847	0.879847
chr17	75276483	75276789	chr17-75276483-DEL-307	chr17	75255001	75280000	0.705031	1.52221	1.19569	1.10567	1.34513	1.52643	1.29191	1.10988	1.20323	1.47944	1.10329	1.17588	1.39798	0.926413	1.5743	1.33283	1.36951	1.51318	1.15012	1.08784	1.19951	1.52404	0.942516	1.98246	1.13962	1.10995	1.25894	0	0.75263	0.75263
chr17	76283603	76284547	chr17-76283603-DEL-945	chr17	76270001	76295000	1.49205	2.46933	2.85199	3.51689	3.57844	3.33135	3.16513	2.99143	2.9755	3.17982	3.29809	3.2709	3.55797	3.20847	3.47042	3.64195	3.15976	2.98722	2.72439	3.36108	3.18689	3.76948	3.05306	2.64432	3.06881	3.2777	3.32815	0	0.0144243	0.0144243
chr17	77245972	77246139	chr17-77245972-DEL-168	chr17	77245001	77270000	0.701033	1.64247	1.4403	0	1.71622	1.56274	1.26841	1.27292	2.05015	0.96775	1.57027	1.47437	1.30652	1.25762	1.10895	1.45057	1.79629	1.99478	1.06335	1.69355	0	1.35503	1.45943	2.2871	1.08938	1.17639	1.52391	2	0.384615	0.384615
chr17	77249767	77249878	chr17-77249767-DEL-112	chr17	77245001	77270000	0.701033	1.64247	1.4403	0	1.71622	1.56274	1.26841	1.27292	2.05015	0.96775	1.57027	1.47437	1.30652	1.25762	1.10895	1.45057	1.79629	1.99478	1.06335	1.69355	0	1.35503	1.45943	2.2871	1.08938	1.17639	1.52391	2	0.810702	0.810702
chr17	79709603	79710165	chr17-79709603-DEL-563	chr17	79705001	79730000	0.607356	1.16474	1.12263	1.23733	1.24805	1.32036	1.34534	0.997582	0.9334	1.27109	1.17035	0.968557	0.98591	1.49298	1.28551	1.29889	0.986148	1.52895	1.01295	1.71507	0.840366	1.81192	1.49657	1.22669	1.28307	1.61179	0	1	0.106	0.106
chr17	80090387	80090449	chr17-80090387-DEL-63	chr17	80070001	80095000	0.272192	0	0.35531	0	0.536979	0.438054	0.732539	0	0	0.27552	0.37246	0.49188	0.484857	0.417855	0	0	0.23089	0.795959	0.419733	0.285428	0.931421	0.53719	0.47282	0.82128	0.422995	0.74288	0	7	0.431892	0.431892
chr17	80155176	80155266	chr17-80155176-DEL-91	chr17	80135001	80160000	0.284384	0.652314	0.559593	0.758143	0	0	0.603213	0.540463	0	0	0	0.580561	0.484857	0	0	0	0	0	0	0.615293	0	0	0.4816	1.0129	0.413202	0.319014	0	14	0.801034	0.801034
chr17	80257657	80257729	chr17-80257657-DEL-73	chr17	80255001	80280000	0.691493	1.02944	0	1.29018	1.27156	1.04251	1.37519	1.28195	1.25228	1.48396	0	0.903207	0.806088	1.6281	1.51948	0.851435	1.16102	0.756918	1.03538	1.18245	1.16611	1.40852	0	2.2771	1.10065	0.711408	1.15199	3	1	1
chr17	80260542	80260757	chr17-80260542-DEL-216	chr17	80255001	80280000	0.691493	1.02944	0	1.29018	1.27156	1.04251	1.37519	1.28195	1.25228	1.48396	0	0.903207	0.806088	1.6281	1.51948	0.851435	1.16102	0.756918	1.03538	1.18245	1.16611	1.40852	0	2.2771	1.10065	0.711408	1.15199	3	0.0738462	0.0738462
chr17	80840923	80841132	chr17-80840923-DEL-210	chr17	80835001	80860000	0.486291	0.97501	0.934119	1.14337	1.01848	0.975342	0.587823	1.01537	0	0	1.03024	0.569383	0.799856	0	0.790121	0.588104	0.921677	0.604693	0.677373	0.842773	1.11715	0.663803	1.19877	0.457084	0	0.97677	1.08247	4	0.0076299	0.0076299
chr17	80994697	80994774	chr17-80994697-DEL-78	chr17	80975001	81000000	0.7846	1.59484	1.5043	1.52364	1.75472	1.92808	1.79859	2.0922	1.54476	1.86815	1.58437	1.66573	1.97909	1.90661	1.13763	2.37213	2.22481	2.01561	1.66276	1.59776	1.52043	1.55746	1.76387	1.96589	1.59984	2.0989	1.91968	0	0.462387	0.462387
chr17	81119648	81119707	chr17-81119648-DEL-60	chr17	81100001	81125000	0.550765	0	1.02033	0.390838	0.732778	1.04156	0.617425	1.41059	0.595783	0.875247	0.617195	0.706251	0.484508	1.1309	0.850256	1.49105	1.00273	1.14759	0.768324	0.549353	0.575548	1.03611	1.52667	0.681185	1.04167	0.647171	1.12755	1	0.143504	0.143504
chr17	81253712	81253762	chr17-81253712-DEL-51	chr17	81230001	81255000	0.554014	0.663082	1.32132	1.11409	0	1.06791	0.818802	0.689477	0.853777	0	1.52927	1.01437	1.14788	0.812591	0	1.00286	1.24873	1.66924	0.955465	0.870897	1.19196	1.54488	1.04107	0.60894	0.93996	1.05067	1.14328	3	0.0568071	0.0568071
chr17	81488377	81488431	chr17-81488377-DEL-55	chr17	81475001	81500000	0.615326	0.997488	1.28692	0.885325	1.41522	1.27589	1.00709	1.41567	1.61115	1.03082	0.989843	1.38102	1.29811	1.11576	1.11523	1.33365	1.56661	1.6562	1.47826	1.34199	1.31909	0	1.21493	1.80677	1.26242	1.60066	1.44456	1	0.850137	0.850137
chr17	82340015	82340093	chr17-82340015-DEL-79	chr17	82325001	82350000	0.794925	1.23813	1.49348	1.13233	1.41028	1.30371	1.03465	1.05147	1.32335	1.47722	1.81801	1.14926	1.50387	1.83997	1.51466	1.18073	0.941862	1.42148	1.38046	1.28559	0.754356	1.44808	1.41851	1.73069	1.46079	0.964453	1.58354	0	0.910143	0.910143
chr17	82411999	82412106	chr17-82411999-DEL-108	chr17	82410001	82435000	0.885081	0	1.43114	1.36329	1.3661	1.65111	1.7501	0	1.50232	1.56537	1.95649	1.27455	1.64659	1.69365	2.34189	1.75133	1.78133	0	1.52143	1.63931	1.44366	0	1.7381	0	1.40748	1.69194	1.66452	5	0.874078	0.874078
chr17	83047812	83047886	chr17-83047812-DEL-75	chr17	83040001	83065000	0.182435	0	0.851586	0.586949	0.485079	1.09948	0	0	0.724578	0	0	0.994587	0.967385	0	0.553995	0	1.06764	0	0	0	1.01388	0	0	0	0	0.774416	0.878275	14	0.373883	0.373883
chr17	83052541	83052642	chr17-83052541-DEL-102	chr17	83040001	83065000	0.182435	0	0.851586	0.586949	0.485079	1.09948	0	0	0.724578	0	0	0.994587	0.967385	0	0.553995	0	1.06764	0	0	0	1.01388	0	0	0	0	0.774416	0.878275	14	0.569474	0.569474
chr17	83052870	83052971	chr17-83052870-DEL-102	chr17	83040001	83065000	0.182435	0	0.851586	0.586949	0.485079	1.09948	0	0	0.724578	0	0	0.994587	0.967385	0	0.553995	0	1.06764	0	0	0	1.01388	0	0	0	0	0.774416	0.878275	14	0.569474	0.569474
chr17	83055343	83055399	chr17-83055343-DEL-57	chr17	83040001	83065000	0.182435	0	0.851586	0.586949	0.485079	1.09948	0	0	0.724578	0	0	0.994587	0.967385	0	0.553995	0	1.06764	0	0	0	1.01388	0	0	0	0	0.774416	0.878275	14	0.305786	0.305786
chr17	83055716	83055772	chr17-83055716-DEL-57	chr17	83040001	83065000	0.182435	0	0.851586	0.586949	0.485079	1.09948	0	0	0.724578	0	0	0.994587	0.967385	0	0.553995	0	1.06764	0	0	0	1.01388	0	0	0	0	0.774416	0.878275	14	0.106854	0.106854
chr18	837103	837418	chr18-837103-DEL-316	chr18	835001	860000	1.33842	2.83719	2.86849	3.25288	2.94094	3.38313	2.60933	3.2318	3.35232	3.16506	2.91548	3.10786	2.85655	3.07284	2.40965	2.42471	3.05097	2.82904	2.93101	3.04272	2.94579	2.59188	2.36056	3.51125	2.60372	2.90019	3.42413	0	0.949802	0.949802
chr18	2997379	2997459	chr18-2997379-DEL-81	chr18	2990001	3015000	0.779833	0.950135	0.898666	0.789526	0.600382	1.16913	0.865974	1.123	0.756346	1.1661	1.09914	0.836529	1.20621	1.37382	0.711367	1.30358	0.977211	0.896559	0.844433	1.05031	0.867347	1.09862	0.423817	0.882773	1.2084	0.931597	1.09783	0	0.874078	0.874078
chr18	3772345	3772398	chr18-3772345-DEL-54	chr18	3750001	3775000	0.323061	0.243577	0	0	0	0	0	0	0	0	0	0.121903	0	0.320917	0	0	0.245375	0	0.441561	0.700747	0.33147	0.410495	0	0.839918	0.38796	0	0	16	0.243064	0.243064
chr18	3997015	3997471	chr18-3997015-DEL-457	chr18	3990001	4015000	0.363033	0.0504058	0.506734	0.989009	0.63988	0.675372	0	0.390935	0	0.374361	0.508922	0.435849	0.787388	0.757283	0	0.673117	0.939529	0.610414	0	1.08636	0.376669	0.458948	0	0.42204	0.405965	0	0	7	0.218529	0.218529
chr18	5209660	5210616	chr18-5209660-DEL-957	chr18	5185001	5210000	0.446349	0.61044	0.850662	0	0.996278	0.47382	0	0.667747	0.536173	0.858175	0	0	0	0	0	0.669658	0	0.695629	0.631236	0	0.543159	0.593452	0.955493	0	0	0	0.49175	12	0.859616	0.859616
chr18	5324645	5326243	chr18-5324645-DEL-1599	chr18	5315001	5340000	0.528289	0.793105	1.16882	1.00728	0.76909	0.656534	1.30714	0.592614	0.67082	1.05502	0.953107	0.959706	0.758024	0.986962	0.722266	0.712692	0.92742	0.69323	0.620474	0.80347	0.977366	1.05219	0.856899	0.656849	1.00916	0.825384	0	1	0.692499	0.692499
chr18	5958110	5958160	chr18-5958110-DEL-51	chr18	5955001	5980000	0.378158	0.392498	0.429896	0	0.515509	0.312359	0.408051	0.133885	0.364966	0	0.274025	0	0.447292	0.57956	0	0.129442	0.485594	0	0.191446	0	0.427536	0.587011	0	0	0.81869	0	0.683534	9	0.420968	0.420968
chr18	6541312	6541500	chr18-6541312-DEL-189	chr18	6525001	6550000	0.454825	0.576753	0.684814	0.317551	1.19475	0.729375	0	0.852965	0.929031	0	0.744516	0.764376	0	0.640204	0.786499	0	1.30439	0.875095	0.870238	0.96087	0.719006	1.3421	0.66138	0.32434	0.903347	0.683431	0	5	0.479323	0.479323
chr18	12227983	12228048	chr18-12227983-DEL-66	chr18	12225001	12250000	0.329039	0.664434	1.07656	0	0.796245	0.782386	0.943386	0.961519	0.980474	0.842203	1.01873	0.690376	0	1.44743	0.930666	0	0.825582	0	0	1.07531	0	1.01779	1.13443	0.671032	0	0	0.731617	8	0.78101	0.78101
chr18	12669053	12669123	chr18-12669053-DEL-71	chr18	12650001	12675000	0.455079	1.62783	1.55619	1.3256	1.46168	1.63245	1.30631	1.32509	1.37046	0	0	0	0	1.02555	1.14336	0	0.834173	1.09136	1.01369	1.64208	0	1.88608	1.53276	0	1.39123	1.48778	1.5544	7	0.656457	0.656457
chr18	24023934	24023983	chr18-24023934-DEL-50	chr18	24005001	24030000	0.302427	0.49027	0.63128	0	0.425665	0.464239	0.672019	0.57589	0.593514	0.463856	0	0.461743	0.661198	0.10602	0.700849	0.746555	0.715356	0.52729	0	0.565779	0	1.0221	0.0829403	0.519027	0.643648	0	0.589366	5	0.683217	0.683217
chr18	25893618	25893686	chr18-25893618-DEL-69	chr18	25890001	25915000	0.401635	0.864033	0.765531	0.532016	0.84863	0.782741	0.924332	0.543434	0.612367	0.876794	0.914343	0.868101	0.887547	0.984934	0	0.532394	1.25473	1.38552	0.98082	1.20293	0.839827	1.57721	1.24582	1.88965	1.10825	1.35391	1.49707	1	0.134991	0.134991
chr18	26167842	26171358	chr18-26167842-DEL-3517	chr18	26155001	26180000	0.372723	0.653897	0.617343	0.77638	0.203998	0.47329	0.86382	0	0.363494	0.372511	0.314053	0.329076	0.411392	0.222896	0.554123	0.368822	0.229927	0.465358	0.445665	0.463438	0.594175	0	0.297146	0.639395	0.280063	0	0.137843	3	0.0273929	0.0273929
chr18	26466002	26466080	chr18-26466002-DEL-79	chr18	26455001	26480000	0.199282	0	0.269202	0	0	0.669019	0.764187	0	0.27648	0	0.287604	0	0	0.446337	0.260303	0.472045	0.363919	0	0.198692	0.139064	0	0	0.256426	0	0.413955	0	0.378373	12	0.340134	0.340134
chr18	32145673	32145724	chr18-32145673-DEL-52	chr18	32145001	32170000	0.79607	1.44251	1.1873	1.20193	1.42964	1.31309	1.48319	1.49055	1.19601	1.69069	1.45354	1.48358	1.37854	1.41431	1.27513	1.48076	1.55117	1.12096	1.37815	1.82776	1.44888	1.86109	0.963223	0.867184	1.55999	0.967832	1.36812	0	0.646084	0.646084
chr18	35957485	35957633	chr18-35957485-DEL-149	chr18	35950001	35975000	0.521076	0	1.35449	1.24631	1.51246	1.18647	1.41258	1.10842	1.44192	1.268	0	1.28061	1.17119	1.55419	1.28655	1.29205	1.61629	0	1.31798	1.0795	1.07463	1.79766	1.04989	1.33761	1.68241	1.04107	1.42445	3	0.849089	0.849089
chr18	40167293	40167346	chr18-40167293-DEL-54	chr18	40160001	40185000	0.189103	0.32598	0	0.142458	0	0	0.41444	0.1702	0.23894	0.336654	0.299855	0	0	0	0	0	0.62928	0	0.191223	0	0	0	0.123548	0.511387	0.428196	0	0.305876	13	0.055041	0.055041
chr18	49493482	49493803	chr18-49493482-DEL-322	chr18	49485001	49510000	0.640447	0.850955	0.662541	0.995308	0.818767	0.731512	1.134	0.990291	1.09896	1.32293	1.02964	1.1088	0.887593	1.27024	1.05748	1.03625	1.05301	0.988635	1.37012	1.22502	0.85227	0.986524	0.870995	1.2308	0.811879	1.1541	1.19641	0	0.03	0.03
chr18	57024581	57024856	chr18-57024581-DEL-276	chr18	57005001	57030000	0.208626	0.175429	0.321101	0.195331	0.447241	0.331892	0.21183	0.405861	0.33974	0	0.396374	0	0.635194	0.467883	0	0.729525	0.359842	0.538334	0.479712	0	0.395269	0	0.353438	0.637519	0.495861	0.216336	0.369105	5	0.576116	0.576116
chr18	57642331	57642436	chr18-57642331-DEL-106	chr18	57620001	57645000	0.674563	0.653691	1.28048	0	0.99748	0.921647	0.475882	0.767858	0	0.578603	0.804828	0.849431	0	0	0	1.14728	1.15428	0.580409	0.823022	0.895948	1.08177	0.863366	0.806839	1.23454	0.873398	0.659431	1.1568	5	1	1
chr18	58134346	58134671	chr18-58134346-DEL-326	chr18	58120001	58145000	0.73929	0	0	1.43907	1.22227	1.58373	1.4288	1.32593	1.36636	1.47422	1.38288	1.34669	1.18608	1.42952	1.36115	0.920656	1.07944	1.26078	1.07779	1.40514	0	1.35124	1.53741	1.81339	0	1.29204	1.3615	4	0.384615	0.384615
chr18	59234065	59234478	chr18-59234065-DEL-414	chr18	59225001	59250000	0.18697	0	0	0.508565	0	0.382672	0.421151	0.516593	0.143089	0.560028	0.274206	0.800859	0.126722	0.385191	0.263259	0	0.254784	0.61695	0	0.694773	0	0.28845	0.466188	0	0.500113	0.187642	0.340029	7	0.422875	0.422875
chr18	62580507	62580638	chr18-62580507-DEL-132	chr18	62575001	62600000	0.770029	1.0054	1.26547	1.18711	1.46185	1.62116	0.79993	0.856576	1.16936	1.2833	1.06706	0.974611	0.985814	0.974866	1.11254	1.39473	1.16946	1.30171	1.08122	1.25292	0.894694	1.09173	0.86801	1.31232	0.813206	1.23607	1.23096	0	0.976354	0.976354
chr18	62581587	62581674	chr18-62581587-DEL-88	chr18	62575001	62600000	0.770029	1.0054	1.26547	1.18711	1.46185	1.62116	0.79993	0.856576	1.16936	1.2833	1.06706	0.974611	0.985814	0.974866	1.11254	1.39473	1.16946	1.30171	1.08122	1.25292	0.894694	1.09173	0.86801	1.31232	0.813206	1.23607	1.23096	0	0.683217	0.683217
chr18	63145352	63145401	chr18-63145352-DEL-50	chr18	63125001	63150000	0.528407	0.704213	1.10695	0.680274	1.04696	0.774248	1.07278	0.625037	0.536021	0.712338	1.00862	0.661964	0.820032	0.969691	0.503059	0.727818	0.717336	0.876836	0.588454	1.04087	1.04086	0.624693	1.00899	0.63043	0.637851	0.963964	1.07147	0	0.775995	0.775995
chr18	70282363	70282687	chr18-70282363-DEL-325	chr18	70270001	70295000	0.350041	0.226734	0.577417	0.339484	0.651373	0.470699	0.0980354	0.0924414	0.109009	0.205935	0	0.61328	0.427002	0.206237	0	0.396489	0.742944	0.493969	0.602244	0.132884	0.405711	0.462784	0.611249	0	0.593384	0	0.337015	4	0.571611	0.571611
chr18	76508874	76509005	chr18-76508874-DEL-132	chr18	76495001	76520000	0.308414	0	0.458878	0	0.928206	0	0.267299	0	0.906767	0.781444	0	0.431718	0	0	0	0	0.976439	0.591608	0.259779	0	0	0.232227	0.142117	0	0.902685	0.234963	0	13	0.26808	0.26808
chr18	76508874	76509005	chr18-76508874-DEL-132	chr18	76500001	76525000	0.308414	0.598774	0.458878	0.206673	0.928206	0	0.267299	0.731223	0.906767	0.781444	0	0.431718	0	0	0.272037	0.699245	0.976439	0.591608	0.259779	0	0	0.232227	0.142117	0	0.902685	0.234963	0	8	0.0232984	0.0465969
chr18	77057815	77058115	chr18-77057815-DEL-301	chr18	77045001	77070000	0.945815	1.07201	0.74863	1.13896	0.777084	0.92626	0.781778	0.906044	0.721429	1.22168	0.949936	1.11534	0.889735	0.920038	0.823604	0.956663	0.946638	1.04873	0.835579	1.00996	0.762868	1.01527	0.764913	1.02929	0.978217	0.770164	0.713447	0	1	1
chr18	77141407	77141500	chr18-77141407-DEL-94	chr18	77125001	77150000	0.829578	1.26466	1.31356	0	1.02541	0.954731	0.787347	0.828188	1.39909	1.31096	1.27543	1.28893	0.943339	1.19435	0.99455	0.730024	1.04121	1.01376	1.1497	0.92617	1.08224	0.758874	0.976767	1.29574	0.770888	0.720505	0.716881	1	0.532737	0.532737
chr18	78754029	78754142	chr18-78754029-DEL-114	chr18	78735001	78760000	0.186816	0.22775	0	0.0899225	0.0853947	0	0	0	0.525197	0.412238	0	0.217399	0.142892	0.152512	0	0	0	0	0.217979	0	0	0	0	0	0	0	0	17	0.711336	0.711336
chr18	79245951	79246097	chr18-79245951-DEL-147	chr18	79235001	79260000	0.186834	0	0.408763	0.499796	0	0.474399	0	0.54858	0	0.432481	0.479349	0.281598	0.417706	0.373369	0.678189	0.371973	0.626692	0	0.580773	0.382397	0.562236	0.513445	0	1.0891	0.234783	0	0.929969	7	0.587512	0.587512
chr18	79246164	79246234	chr18-79246164-DEL-71	chr18	79235001	79260000	0.186834	0	0.408763	0.499796	0	0.474399	0	0.54858	0	0.432481	0.479349	0.281598	0.417706	0.373369	0.678189	0.371973	0.626692	0	0.580773	0.382397	0.562236	0.513445	0	1.0891	0.234783	0	0.929969	7	1	1
chr18	79521174	79521436	chr18-79521174-DEL-263	chr18	79520001	79545000	0.93836	1.64281	1.94893	1.98643	1.43045	1.73413	1.82586	1.51817	1.57963	1.79355	1.94925	1.7842	1.47491	1.7071	1.29635	0.97778	1.44744	1.47895	2.04583	1.48469	1.99868	2.49259	1.03347	0.957934	1.76341	1.36155	1.55235	0	0.0232984	0.0232984
chr18	79525029	79525160	chr18-79525029-DEL-132	chr18	79520001	79545000	0.93836	1.64281	1.94893	1.98643	1.43045	1.73413	1.82586	1.51817	1.57963	1.79355	1.94925	1.7842	1.47491	1.7071	1.29635	0.97778	1.44744	1.47895	2.04583	1.48469	1.99868	2.49259	1.03347	0.957934	1.76341	1.36155	1.55235	0	0.863946	0.863946
chr18	79525353	79525418	chr18-79525353-DEL-66	chr18	79520001	79545000	0.93836	1.64281	1.94893	1.98643	1.43045	1.73413	1.82586	1.51817	1.57963	1.79355	1.94925	1.7842	1.47491	1.7071	1.29635	0.97778	1.44744	1.47895	2.04583	1.48469	1.99868	2.49259	1.03347	0.957934	1.76341	1.36155	1.55235	0	0.835773	0.835773
chr18	79764531	79765046	chr18-79764531-DEL-516	chr18	79765001	79790000	0.212811	0.200164	0	0.513148	0	0.453351	0	0	0.552594	0	0	0.101809	0	0	0	0.623187	0.427295	0.668561	0.491924	0.12568	0	0.528173	0	0.494063	0	0.567808	0.632975	12	0.108919	0.108919
chr18	79765076	79765204	chr18-79765076-DEL-129	chr18	79765001	79790000	0.212811	0.200164	0	0.513148	0	0.453351	0	0	0.552594	0	0	0.101809	0	0	0	0.623187	0.427295	0.668561	0.491924	0.12568	0	0.528173	0	0.494063	0	0.567808	0.632975	12	0.918261	0.918261
chr18	79780141	79780350	chr18-79780141-DEL-210	chr18	79765001	79790000	0.212811	0.200164	0	0.513148	0	0.453351	0	0	0.552594	0	0	0.101809	0	0	0	0.623187	0.427295	0.668561	0.491924	0.12568	0	0.528173	0	0.494063	0	0.567808	0.632975	12	0.495435	0.806683
chr18	79780141	79780350	chr18-79780141-DEL-210	chr18	79775001	79800000	0.212811	0.200164	0.174179	0.513148	0	0.453351	0.424979	0	0.552594	0	0	0	0	0	0	0.623187	0	0.668561	0.491924	0.12568	0	0.528173	0	0.494063	0.359656	0.567808	0.632975	11	0.806683	0.806683
chr18	79780187	79780291	chr18-79780187-DEL-105	chr18	79765001	79790000	0.212811	0.200164	0	0.513148	0	0.453351	0	0	0.552594	0	0	0.101809	0	0	0	0.623187	0.427295	0.668561	0.491924	0.12568	0	0.528173	0	0.494063	0	0.567808	0.632975	12	0.697882	0.736605
chr18	79780187	79780291	chr18-79780187-DEL-105	chr18	79775001	79800000	0.212811	0.200164	0.174179	0.513148	0	0.453351	0.424979	0	0.552594	0	0	0	0	0	0	0.623187	0	0.668561	0.491924	0.12568	0	0.528173	0	0.494063	0.359656	0.567808	0.632975	11	0.736605	0.736605
chr18	80032973	80033024	chr18-80032973-DEL-52	chr18	80020001	80045000	0.569322	0.608943	0.353205	0.386268	0.328505	0.555002	0.233122	0	0	0.586717	0	0.558656	0.513168	0.508267	0.384781	0	0.552597	0.469481	0.447989	0.373785	0	0.568527	0.598836	0.305131	0.493216	0.63082	0	6	0.539953	0.539953
chr19	492843	492978	chr19-492843-DEL-136	chr19	490001	515000	0.65821	0	1.3575	0	1.99031	1.1398	1.46364	1.48173	1.33751	1.62362	1.18583	1.91241	1.75917	0.984324	1.27683	1.89575	1.74251	0.977982	1.63664	1.59095	1.69456	2.06662	1.16128	2.23486	1.62014	1.04036	1.29155	2	0.330176	0.330176
chr19	667324	667480	chr19-667324-DEL-157	chr19	650001	675000	0.714112	1.194	1.134	0.967716	1.04454	0.922188	1.21843	1.26322	0.621476	1.47527	0.966239	0.822722	0	1.31986	0.972992	1.37138	1.02288	1.41856	1.12886	0.969522	0.805068	0.839459	0.926249	1.31337	1.23352	0.869248	1.36832	1	1	1
chr19	765231	765306	chr19-765231-DEL-76	chr19	750001	775000	0.691751	1.29351	1.3211	1.0971	1.33296	1.47971	0.992602	0.799173	1.20106	1.18328	1.3961	1.14647	1.42727	1.80287	1.4896	1.73183	0.962391	1.3032	1.01169	1.20141	1.17704	1.66588	1.04168	1.38251	1.44158	0.727603	1.52642	0	0.613408	0.613408
chr19	861324	861388	chr19-861324-DEL-65	chr19	845001	870000	0.744624	1.08344	0.965136	0.940125	0.644683	0.901854	1.09261	0	0.658552	1.02754	1.54801	1.09958	1.22084	0.825347	1.35139	1.43081	0.915753	1.13535	0.823535	1.07666	1.62133	1.00694	0.988205	0.932348	1.0647	0.978103	0.863808	1	0.919734	0.919734
chr19	866581	866631	chr19-866581-DEL-51	chr19	845001	870000	0.744624	1.08344	0.965136	0.940125	0.644683	0.901854	1.09261	0	0.658552	1.02754	1.54801	1.09958	1.22084	0.825347	1.35139	1.43081	0.915753	1.13535	0.823535	1.07666	1.62133	1.00694	0.988205	0.932348	1.0647	0.978103	0.863808	1	0.279225	0.279225
chr19	866849	866899	chr19-866849-DEL-51	chr19	845001	870000	0.744624	1.08344	0.965136	0.940125	0.644683	0.901854	1.09261	0	0.658552	1.02754	1.54801	1.09958	1.22084	0.825347	1.35139	1.43081	0.915753	1.13535	0.823535	1.07666	1.62133	1.00694	0.988205	0.932348	1.0647	0.978103	0.863808	1	0.721104	0.721104
chr19	1247065	1247368	chr19-1247065-DEL-304	chr19	1230001	1255000	0.661082	0	0	0	0	0	0	0	0	0	0	0	0	0	0	0	0	0	0	0	0	0	0	0	0	2.11329	2.63381	24	0.938176	0.938176
chr19	2015867	2015980	chr19-2015867-DEL-114	chr19	2000001	2025000	0.75487	0.841468	1.44864	1.34951	2.15218	1.48057	1.04289	1.07233	1.06783	1.62055	1.9677	1.34692	1.43778	1.48072	1.69866	1.63319	1.53539	1.48105	1.36088	1.29359	1.44619	1.55787	1.49707	1.57986	1.41386	1.58292	1.39928	0	0.75263	0.75263
chr19	2153880	2153986	chr19-2153880-DEL-107	chr19	2140001	2165000	0.675999	1.18575	1.30465	1.30183	0	1.50514	0	1.23956	0	0	0	1.44582	1.27813	0	0	0	1.22087	1.99064	0	1.48379	0	1.76919	1.43001	1.63854	1.39012	1.35593	1.60243	10	0.237857	0.237857
chr19	2278345	2278398	chr19-2278345-DEL-54	chr19	2265001	2290000	0.185468	0	0	0	0	0	0	0	0	0.887529	0	0	0	0	0	0	0	0	0	0	0	0	0	0	0	0.811365	0	24	0.744473	0.744473
chr19	2333000	2333120	chr19-2333000-DEL-121	chr19	2310001	2335000	0.307968	0.763099	0	0	0	0.414511	0.567641	0	0.606647	0	0	0.296851	0	0	0	0.798213	0	0	0	0	0.866438	0	0.422611	0	0.406345	0	0	17	0.692308	0.692308
chr19	2772765	2773256	chr19-2772765-DEL-492	chr19	2770001	2795000	0.318433	1.4945	1.47156	1.46343	0	1.39357	0.714547	1.35001	1.39386	1.52967	1.38781	1.32633	1.54036	0	1.54527	1.8142	0	0	1.48063	1.43721	1.5989	0	1.23536	1.5881	1.19377	1.13234	1.12647	5	0.959358	0.959358
chr19	2772971	2773052	chr19-2772971-DEL-82	chr19	2770001	2795000	0.318433	1.4945	1.47156	1.46343	0	1.39357	0.714547	1.35001	1.39386	1.52967	1.38781	1.32633	1.54036	0	1.54527	1.8142	0	0	1.48063	1.43721	1.5989	0	1.23536	1.5881	1.19377	1.13234	1.12647	5	0.879847	0.879847
chr19	2773522	2773603	chr19-2773522-DEL-82	chr19	2770001	2795000	0.318433	1.4945	1.47156	1.46343	0	1.39357	0.714547	1.35001	1.39386	1.52967	1.38781	1.32633	1.54036	0	1.54527	1.8142	0	0	1.48063	1.43721	1.5989	0	1.23536	1.5881	1.19377	1.13234	1.12647	5	0.879847	0.879847
chr19	2805821	2805876	chr19-2805821-DEL-56	chr19	2805001	2830000	0.304772	0	0	0	1.33275	0	0.813096	0	0	0	0	0	0	0	0	0	1.72635	0	0	0	0	0	0	0	0	0	0	23	0.530782	0.530782
chr19	2817870	2818126	chr19-2817870-DEL-257	chr19	2805001	2830000	0.304772	0	0	0	1.33275	0	0.813096	0	0	0	0	0	0	0	0	0	1.72635	0	0	0	0	0	0	0	0	0	0	23	0.474678	0.474678
chr19	3173349	3175786	chr19-3173349-DEL-2438	chr19	3175001	3200000	0.76092	1.14212	1.27203	1.31142	1.37653	1.31502	1.56782	1.25474	1.64673	1.45223	1.50551	1.71982	0	1.24108	1.53903	2.14846	1.85664	1.41556	0.77468	1.37553	1.66294	1.33958	1.52608	0	1.6643	0	0	4	0.251906	0.251906
chr19	3174843	3175074	chr19-3174843-DEL-232	chr19	3175001	3200000	0.76092	1.14212	1.27203	1.31142	1.37653	1.31502	1.56782	1.25474	1.64673	1.45223	1.50551	1.71982	0	1.24108	1.53903	2.14846	1.85664	1.41556	0.77468	1.37553	1.66294	1.33958	1.52608	0	1.6643	0	0	4	0.935022	0.935022
chr19	3310082	3310141	chr19-3310082-DEL-60	chr19	3310001	3335000	0.568936	0	1.2937	1.59446	1.07924	1.29519	0	0	1.32193	0	1.0627	1.63802	1.10801	0	1.34319	1.07527	1.5313	1.3939	1.5582	0	0	1.29477	1.56652	1.38274	1.61407	0	1.51785	8	0.530782	0.530782
chr19	3716046	3717366	chr19-3716046-DEL-1321	chr19	3715001	3740000	0.790627	0	1.39922	1.20272	1.6036	1.23869	1.5035	1.44014	1.66558	1.18049	1.0424	1.21125	1.24794	1.04625	1.08123	0	2.10307	1.26281	1.34184	1.55455	0.966722	1.69772	1.56152	1.11473	1.72622	0.991566	0	3	0.801034	0.801034
chr19	3973098	3974169	chr19-3973098-DEL-1072	chr19	3970001	3995000	0.763022	0	1.65974	1.93614	0	1.5135	0	1.38131	0	1.87597	1.35175	1.67993	0	1.55668	2.00639	1.73471	1.69267	1.62973	1.36663	1.62007	1.03484	2.00534	1.57048	2.00756	1.25023	1.84949	1.41227	5	0.461538	0.461538
chr19	3994547	3994873	chr19-3994547-DEL-327	chr19	3970001	3995000	0.763022	0	1.65974	1.93614	0	1.5135	0	1.38131	0	1.87597	1.35175	1.67993	0	1.55668	2.00639	1.73471	1.69267	1.62973	1.36663	1.62007	1.03484	2.00534	1.57048	2.00756	1.25023	1.84949	1.41227	5	0.0535812	0.0535812
chr19	4125891	4126093	chr19-4125891-DEL-203	chr19	4120001	4145000	0.476155	0.810749	0.511319	0.747607	0.858621	0.802554	0.722712	0.602585	0.719798	0.892613	0.559244	0.7003	0.759265	0.592889	0.34652	0.829939	0.664344	1.35031	0.529928	0.494319	0.466236	0.622724	0.491152	1.21121	0.672191	0.703581	0.694043	0	0.613408	0.613408
chr19	4874747	4875065	chr19-4874747-DEL-319	chr19	4855001	4880000	0.547218	0	0.448261	0.255757	0	0.129168	0.337809	0.166244	0	0.267333	0.60899	0.367803	0	0.692313	0	0.288962	0	0.275018	0	0.167985	0.168733	0	0.241851	0	0	0	0	12	0.25035	0.25035
chr19	5796157	5796378	chr19-5796157-DEL-222	chr19	5785001	5810000	0.514973	0.812069	0.937472	0.990069	0.508858	0.731276	1.09692	0.93897	1.0383	1.41124	0.840851	0.832629	1.06738	0.878815	0	0	1.16103	0.678263	1.0621	0.724065	1.2229	1.22267	0.93386	0	1.14381	0.898228	0.968046	3	0.431892	0.431892
chr19	6429055	6429144	chr19-6429055-DEL-90	chr19	6410001	6435000	0.225033	0	0	0	0	0	0	0	0	0	0.123529	0	0	0	0.35225	0	0	0	0	0	0	0	0	0	0	0.264301	0	23	0.65868	0.65868
chr19	8274662	8289524	chr19-8274662-DEL-14863	chr19	8250001	8275000	1.41439	2.67048	1.54591	2.48128	2.588	3.04829	2.63161	0	2.18646	2.63259	3.20776	2.35887	2.44239	2.60671	2.31262	3.10085	3.01997	2.93065	2.16554	2.77641	2.43926	2.6118	2.6404	1.16463	1.39678	3.79297	2.34891	1	0.923077	0.923077
chr19	8771017	8778466	chr19-8771017-DEL-7450	chr19	8765001	8790000	1.46311	4.60498	0	0	1.265	0	1.5497	0	0	4.38147	4.25806	1.13158	0	0.931897	0	0	2.06621	0	0	0	1.67451	3.58236	2.71867	5.19715	0	0	5.95393	13	0.96	0.96
chr19	8884375	8884521	chr19-8884375-DEL-147	chr19	8880001	8905000	0.39884	0.759255	0.774219	0	0.284936	0	1.04633	0	0.837544	0	0.762682	0.904292	0.361392	0	1.11146	0.34246	0	0	0	0.309791	0	0	0.455548	0	0.497323	0	0.28729	12	0.0149935	0.0149935
chr19	9112269	9114445	chr19-9112269-DEL-2177	chr19	9110001	9135000	0.507974	1.28855	0.841353	1.18987	1.17676	0.871906	0.746492	0	0.820168	1.07658	0.975755	1.10625	0	1.09364	1.30426	0.824673	0.917538	0.864103	0.668125	1.10276	0.610353	1.10608	0.89238	0.953809	1.17169	0.459396	1.32229	2	0.340134	0.340134
chr19	9408968	9409023	chr19-9408968-DEL-56	chr19	9390001	9415000	0.208776	0.189505	0	0	0	0	0.168024	0	0	0.050823	0.342422	0	0	0.384066	0	0	0	0.321803	0	0	0	0	0	0	0	0	0	20	0.789741	0.789741
chr19	15581078	15581138	chr19-15581078-DEL-61	chr19	15565001	15590000	0.632767	1.54858	1.60523	1.58885	1.67159	1.66178	1.66401	1.63702	1.50084	1.32282	1.43966	1.40889	0	1.23673	1.22891	1.76452	1.33186	1.44622	1.34086	1.68463	1.22412	1.82234	1.40682	2.00934	1.47729	1.27978	1.33219	1	0.25035	0.25035
chr19	16033447	16033570	chr19-16033447-DEL-124	chr19	16020001	16045000	0.445443	1.24685	1.05548	0.911217	0.707843	1.25317	0.709338	0.950796	1.04819	0.761117	0.799688	0.960813	1.06213	0.738869	0.499963	1.17827	0	0.776561	0.942215	1.05362	1.0985	0.915521	0.930872	0.63719	0.84805	0.648786	1.02425	1	0.651177	0.651177
chr19	17463768	17463946	chr19-17463768-DEL-179	chr19	17460001	17485000	0.602339	0.880902	0.729305	1.31372	1.18416	1.12651	0.654962	1.16479	1.20759	0.865529	0.974298	0.842651	1.31869	0.993473	1.0899	0.496212	1.35443	0.820163	1.17573	1.08115	1.35566	1.03053	0.887643	0.824767	0.801218	0.879395	0.960663	0	0.630785	0.630785
chr19	17593101	17593483	chr19-17593101-DEL-383	chr19	17585001	17610000	0.42381	0	0.895773	0.35372	0.913934	0.862257	0.542788	1.00374	0	0.925541	0.672578	0.938511	0.595338	0.901515	0	0.97098	0.826163	0.876849	1.13438	0.749388	0.781208	0.821274	0	0.979624	0.971476	0.934461	0.950371	4	0.683178	0.683178
chr19	19147210	19147483	chr19-19147210-DEL-274	chr19	19125001	19150000	0.900431	1.16696	1.29096	1.22838	1.26343	1.26604	0.918014	1.5502	1.18688	1.15478	1.20452	1.27883	0.934886	1.27776	1.7022	1.51485	1.69685	1.17901	0.953466	1.23065	0.736578	1.63246	0.963377	0.787093	1.34842	1.0447	1.2765	0	0.574383	0.574383
chr19	19930530	19930582	chr19-19930530-DEL-53	chr19	19925001	19950000	0.247896	0.792578	1.08204	0.891088	0.845843	0.531163	0	0.748611	0	0.629528	0	0.487244	0.363069	0.860844	0.578552	0.459234	0.593661	0.196212	0.478359	0.430774	0.467293	0	0	0.619595	0.576216	0.507339	0.385137	5	0.899787	0.899787
chr19	20913506	20914147	chr19-20913506-DEL-642	chr19	20895001	20920000	0.31146	0.671998	0.91998	0.559301	0.445184	0.433278	0.43824	0.352075	0	0.848058	0.557771	0.338799	0	0	0.490487	0.840017	0.882678	0.391116	0.990257	0.753106	0.796674	0.706196	0.245855	0	0.636358	0.578113	0.365996	4	0.789741	0.789741
chr19	21865429	21865526	chr19-21865429-DEL-98	chr19	21855001	21880000	0.270805	0.618057	1.3003	0.794105	0.313449	0.907219	1.12044	0.648693	0.521325	0.442217	1.20684	0.860489	0.673643	0.848048	0.775466	0.653907	0.839221	0.561392	1.30435	0.754651	0	1.07964	0.231763	0.609234	1.1115	0.937355	1.03189	1	0.777714	0.777714
chr19	21865696	21865920	chr19-21865696-DEL-225	chr19	21855001	21880000	0.270805	0.618057	1.3003	0.794105	0.313449	0.907219	1.12044	0.648693	0.521325	0.442217	1.20684	0.860489	0.673643	0.848048	0.775466	0.653907	0.839221	0.561392	1.30435	0.754651	0	1.07964	0.231763	0.609234	1.1115	0.937355	1.03189	1	0.949802	0.949802
chr19	22756179	22756762	chr19-22756179-DEL-584	chr19	22755001	22780000	0.190037	0	0	0.403178	0.40184	0	0	0	0	0	0.329645	0.300381	0	0	0	0	0	0	0.264827	0	0.228308	0.214634	0.273572	0.554597	0	0.299718	0.234963	15	0.613408	0.613408
chr19	22756599	22756682	chr19-22756599-DEL-84	chr19	22755001	22780000	0.190037	0	0	0.403178	0.40184	0	0	0	0	0	0.329645	0.300381	0	0	0	0	0	0	0.264827	0	0.228308	0.214634	0.273572	0.554597	0	0.299718	0.234963	15	0.494193	0.494193
chr19	23282326	23283970	chr19-23282326-DEL-1645	chr19	23275001	23300000	0.470376	0.414173	0.500343	0.312938	0	0.290066	0.587875	0	0.803119	0	0.354283	0.231367	0.274558	0.394198	0.366843	0	0	0.406239	0.372852	0	0	0.71006	0	0.142516	0.672181	0.321772	0.317833	8	0.312319	0.312319
chr19	23622971	23625516	chr19-23622971-DEL-2546	chr19	23625001	23650000	0.275118	0.618256	0.568066	0.536321	0.62237	0	0.996882	0.909371	0.760504	0.639959	0.476646	0.418492	0.638172	0.79245	0.986319	0.326877	0.656403	0.673335	0.612625	0.510543	0.769291	0.741719	0	0.933264	0	0.315827	1.0461	3	0.494193	0.494193
chr19	23635793	23635882	chr19-23635793-DEL-90	chr19	23625001	23650000	0.275118	0.618256	0.568066	0.536321	0.62237	0	0.996882	0.909371	0.760504	0.639959	0.476646	0.418492	0.638172	0.79245	0.986319	0.326877	0.656403	0.673335	0.612625	0.510543	0.769291	0.741719	0	0.933264	0	0.315827	1.0461	3	0.569083	0.569083
chr19	29719367	29719758	chr19-29719367-DEL-392	chr19	29715001	29740000	0.774022	1.22968	1.77826	1.41342	1.21776	1.51944	1.33674	1.8809	1.3759	1.34414	1.24344	1.27496	1.30652	1.47661	1.62248	1.72246	1.58827	1.39685	1.26951	1.38152	1.52893	1.32071	1.36226	1.86298	1.50021	1.45567	1.4972	0	0.177243	0.177243
chr19	29910047	29910230	chr19-29910047-DEL-184	chr19	29910001	29935000	0.417451	0	0	0	0.721532	0	0	0	0.455189	0.726772	0	0	0	0.533496	0	0	0	0.397807	0	0	0	0.691578	0	0	0	0	0	20	0.846154	0.846154
chr19	29920158	29920209	chr19-29920158-DEL-52	chr19	29910001	29935000	0.417451	0	0	0	0.721532	0	0	0	0.455189	0.726772	0	0	0	0.533496	0	0	0	0.397807	0	0	0	0.691578	0	0	0	0	0	20	0.846154	0.846154
chr19	34252578	34252876	chr19-34252578-DEL-299	chr19	34230001	34255000	0.413044	1.21111	0.921142	0.622856	0.811212	0.628403	0	0	0.644771	0	0.87411	0.687178	0	1.00633	0	0.911715	0.723004	1.0147	0.732677	0.970485	0.557822	0.658655	0	0.756035	1.17693	0.976335	0.727697	6	0.446944	0.446944
chr19	35045651	35045719	chr19-35045651-DEL-69	chr19	35025001	35050000	0.673053	1.01693	1.24519	1.60345	1.19842	1.31397	1.27212	1.03913	1.58415	1.29692	1.00588	1.32974	1.99591	1.28243	1.66905	1.12094	1.0896	1.28187	1.29153	1.5198	1.07187	1.45699	1.16085	1.11027	1.49995	1.16603	1.49514	0	0.835773	0.835773
chr19	37268662	37273728	chr19-37268662-DEL-5067	chr19	37260001	37285000	1.52804	4.01929	0	0	2.79461	0	0	0	4.09974	0	4.87629	0	0	0	0	0	0	3.4489	0	0	3.05544	3.34007	3.68235	3.83048	0	2.0629	0	16	0.879847	0.879847
chr19	38344662	38344761	chr19-38344662-DEL-100	chr19	38325001	38350000	0.61867	0	0	0	0	0.95939	0.660299	0	0	0	0	0	0	0	0	0	0	0	0	0	0	0	0	0	0	0	0	24	0.801034	0.801034
chr19	38743330	38743401	chr19-38743330-DEL-72	chr19	38720001	38745000	0.505713	1.18388	1.65847	1.2779	1.31326	0.949339	1.22865	0.773627	0.757014	1.20553	0.903195	1.02842	1.00096	1.27601	0.877829	1.43062	1.45624	0.963967	0.931245	1.19252	1.14415	1.21282	1.37704	1.0808	1.36505	1.2624	1.42406	0	0.878479	0.878479
chr19	38945479	38945542	chr19-38945479-DEL-64	chr19	38930001	38955000	1.00596	1.73137	1.94418	1.53802	1.98137	1.64686	1.32941	2.47576	1.7876	1.78513	1.57908	1.71351	1.50435	1.55777	1.89681	1.40778	2.21255	1.54489	1.81894	1.46889	2.10875	1.89595	1.674	1.8491	1.9042	1.52094	1.92202	0	0.231155	0.231155
chr19	39068497	39068562	chr19-39068497-DEL-66	chr19	39050001	39075000	0.314287	0	0	0	0	0	0	0	0	0	0	0	0	0	0	0	1.10207	0	0	0	0	0	0	0	0	0	0	25	0.798805	0.798805
chr19	39196681	39196754	chr19-39196681-DEL-74	chr19	39190001	39215000	0.30283	0.607387	0.664876	0.515434	0.362484	0.832831	0.716576	0.544483	0.889373	0.744878	0.884086	0.595038	0.517933	0.831319	1.28461	0.901689	0.989548	0.908546	0.425518	0.62366	0.934653	1.21001	0.388521	0	0.973335	0.604049	0.817419	1	0.0467071	0.0467071
chr19	39766905	39767210	chr19-39766905-DEL-306	chr19	39760001	39785000	0.815296	1.00335	1.09842	1.76009	1.57021	1.3859	1.37941	1.40241	1.1801	1.25838	1.59735	1.23351	1.3822	1.45815	0.706853	1.10745	1.18117	1.55615	1.64643	1.40038	0.943507	1.37924	1.25381	1.92372	1.40232	0.920274	1.30568	0	0.338342	0.338342
chr19	39873589	39889864	chr19-39873589-DEL-16276	chr19	39850001	39875000	1.11595	1.89553	1.89189	1.89837	2.1889	1.72343	1.57982	2.50359	1.79561	2.07129	1.79608	1.99724	1.40404	1.70471	2.71982	0	2.05936	2.40843	2.05774	2.27626	1.95783	1.88391	1.86636	2.40305	1.82417	1.98932	1.96887	1	0.324397	0.324397
chr19	40117181	40119395	chr19-40117181-DEL-2215	chr19	40115001	40140000	0.603477	0	1.12653	1.09731	1.21435	0.982755	0.953415	0	0.786406	1.30236	1.08906	1.08906	0.972628	0.728373	0.782294	1.31393	1.24866	1.0363	1.29483	1.14061	0.903855	1.13716	0.732353	0	1.11793	0.955312	0.870534	3	0.138127	0.138127
chr19	41361587	41361878	chr19-41361587-DEL-292	chr19	41345001	41370000	0.331566	0	0	0.320999	0	0.458123	0	0	0.442923	0.225135	0	0.179716	0	0.485244	0.398943	0	0.479685	0.47492	0	0.524497	0	0	0.201722	0	0	0	0.321803	14	0.230769	0.230769
chr19	43196801	43260668	chr19-43196801-DEL-63868	chr19	43190001	43215000	0.210869	1.47286	0	0	0.501015	0.31131	0	0.934366	0.633773	0.764292	0.331063	0.740697	0.68203	0.56992	0	1.11994	0	0	0.8746	1.10508	0	1.03112	0	1.29694	0.694467	0.510309	0.379478	8	0.409486	0.409486
chr19	43432522	43432583	chr19-43432522-DEL-62	chr19	43415001	43440000	0.990357	2.20655	1.64647	1.90634	2.02151	1.9296	2.30361	2.02807	1.74361	1.81853	2.16319	1.80026	1.32346	1.52798	1.58433	2.27435	1.94816	1.85678	1.89402	2.23331	1.56348	2.04907	1.87053	2.22932	2.32287	1.5103	2.9499	0	0.0568071	0.0568071
chr19	43998007	43998059	chr19-43998007-DEL-53	chr19	43995001	44020000	0.212962	0	0.511171	0.295488	0.436004	0.47565	0.39144	0.32946	0.159036	0	0.281484	0.231389	0.156041	0.468974	0	0.232284	0.364904	0	0.4757	0	0.46229	0	0.334282	0	0	0.256208	0.5656	8	0.849089	0.849089
chr19	44778418	44778489	chr19-44778418-DEL-72	chr19	44770001	44795000	1.02447	1.63375	1.5638	1.62202	1.84617	1.32589	1.27623	1.3178	1.70556	1.59747	1.50739	1.73745	1.8188	1.71857	0.769151	2.00486	1.39529	1.50013	1.46127	1.46045	1.26584	1.85964	1.72917	1.45456	1.6772	1.53723	1.60452	0	0.479323	0.479323
chr19	44778634	44778705	chr19-44778634-DEL-72	chr19	44770001	44795000	1.02447	1.63375	1.5638	1.62202	1.84617	1.32589	1.27623	1.3178	1.70556	1.59747	1.50739	1.73745	1.8188	1.71857	0.769151	2.00486	1.39529	1.50013	1.46127	1.46045	1.26584	1.85964	1.72917	1.45456	1.6772	1.53723	1.60452	0	0.397104	0.397104
chr19	45400750	45401074	chr19-45400750-DEL-325	chr19	45390001	45415000	0.763174	0	1.73555	0	1.56333	1.66599	1.68002	1.75638	0	0	0	0	0	0	1.41477	0	0	1.57855	0	1.6231	0	1.89902	0	2.03356	1.53414	0	0	15	0.789741	0.789741
chr19	45594722	45594856	chr19-45594722-DEL-135	chr19	45570001	45595000	0.585908	0.612065	0.894808	0.812951	0.741649	0.76599	0.730747	0.436956	0.412334	1.0902	0.869366	0.658869	0	1.18511	0.513899	0.750385	1.02265	1.38687	0.968072	1.15298	1.10595	1.31404	0.862754	1.0058	0.862466	0.466961	0.791747	1	0.39464	0.39464
chr19	45775395	45776370	chr19-45775395-DEL-976	chr19	45760001	45785000	0.225346	0.548894	0	0.793596	0	0.505292	0	0	0	0	0.508569	0	0	0.570222	0	0	0	0	0	0.839887	0	0	0	0	0	0	0	20	0.295426	0.295426
chr19	46078806	46078901	chr19-46078806-DEL-96	chr19	46060001	46085000	0.222373	0	0.553433	0	0	0	0	0	0	0.800061	0	0	0	0	0	0	0	0	0	0	0	0.730471	0	0	0	0	0	23	0.490953	0.490953
chr19	46389363	46389414	chr19-46389363-DEL-52	chr19	46385001	46410000	0.786373	1.63586	1.62359	1.29531	1.19207	0	1.68916	1.47154	0.915391	1.16791	1.49604	1.42983	1.53809	1.6786	1.6057	1.60094	1.80105	1.45627	1.36218	1.32224	1.36229	1.29555	1.22102	1.31245	1.28594	1.31946	1.69291	1	0.395807	0.395807
chr19	46510527	46510576	chr19-46510527-DEL-50	chr19	46500001	46525000	0.727078	1.37722	1.34573	1.58218	1.38503	1.59118	1.3145	1.3532	1.31796	1.37215	1.49608	1.45057	1.54469	1.57829	1.78657	1.06324	1.35501	1.37845	1.5166	1.17473	1.45549	1.41626	1.32933	1.83736	0	1.27779	2.09354	1	0.0351657	0.0351657
chr19	47025009	47025475	chr19-47025009-DEL-467	chr19	47015001	47040000	0.328563	1.26241	1.39874	1.48644	1.29818	1.36055	1.30171	1.49459	1.16953	1.33121	1.20479	1.19267	1.27769	0	1.52695	1.49004	1.30469	1.28011	1.32707	1.40691	1.1867	1.11138	1.42906	1.55071	1.25274	1.45085	1.56636	1	0.609783	0.609783
chr19	47025009	47025475	chr19-47025009-DEL-467	chr19	47020001	47045000	0.328563	0	1.39874	0	1.29818	0	0	1.49459	1.16953	1.33121	1.20479	0	0	0	0	0	0	0	0	0	0	1.11138	1.42906	0	0	1.45085	1.56636	16	0.384162	0.609783
chr19	47027493	47027646	chr19-47027493-DEL-154	chr19	47015001	47040000	0.328563	1.26241	1.39874	1.48644	1.29818	1.36055	1.30171	1.49459	1.16953	1.33121	1.20479	1.19267	1.27769	0	1.52695	1.49004	1.30469	1.28011	1.32707	1.40691	1.1867	1.11138	1.42906	1.55071	1.25274	1.45085	1.56636	1	0.196656	0.393311
chr19	47027493	47027646	chr19-47027493-DEL-154	chr19	47020001	47045000	0.328563	0	1.39874	0	1.29818	0	0	1.49459	1.16953	1.33121	1.20479	0	0	0	0	0	0	0	0	0	0	1.11138	1.42906	0	0	1.45085	1.56636	16	0.75786	0.75786
chr19	47925188	47951723	chr19-47925188-DEL-26536	chr19	47930001	47955000	1.85562	0	0	0	7.88814	0	0	0	0	0	0	0	0	0	4.43758	0	0	4.64873	0	0	0	0	0	0	0	0	0	23	0.495435	0.495435
chr19	48342290	48342342	chr19-48342290-DEL-53	chr19	48325001	48350000	0.229309	0.523118	0	0	0.540881	0	0.36736	0.557684	0	0	0	0	0.405745	0	0	0	0	0.170859	0.406973	0.640984	0	0.815381	0.406023	0	0.488335	0	0	15	0.544604	0.544604
chr19	48871725	48871860	chr19-48871725-DEL-136	chr19	48850001	48875000	0.865896	1.09765	1.35645	1.5084	1.38136	1.82421	1.49508	1.34163	1.54223	1.85368	1.61092	1.5654	1.29413	1.42763	1.08112	1.44782	1.95693	1.58708	1.26218	1.54555	1.2568	1.69985	1.41404	1.54131	1.53889	1.1292	1.52483	0	0.865552	0.865552
chr19	49875294	49875365	chr19-49875294-DEL-72	chr19	49860001	49885000	0.48852	0.62441	0.513695	0.761007	0.86198	0.785519	0.793762	0.689432	1.10413	0.497495	0.576599	0	0.725403	0.784441	0	0.688854	0.522343	0	0.336001	0.668155	1.00876	0.971146	0	0.470508	0.819664	0.678737	0.577053	4	0.278352	0.278352
chr19	50331240	50331297	chr19-50331240-DEL-58	chr19	50315001	50340000	1.07835	0	1.62927	1.93358	1.97617	1.90671	2.08211	1.55291	2.31337	0	1.73679	2.19757	2.00001	2.05163	1.90394	1.58777	2.32792	2.14465	2.06314	0	2.34097	0	0	1.8826	2.05609	1.64863	0	6	0.355123	0.355123
chr19	51976030	51976090	chr19-51976030-DEL-61	chr19	51975001	52000000	0.311788	0	0.287867	0.652881	0.586733	0.33135	0.391905	0	0.424805	0	0.179316	0.312757	0.292715	0.672184	0.577271	0.338402	0.528088	0	0.52688	0.289058	0.324042	0	0.298052	0.133401	0.407361	0.59774	0	6	0.251953	0.251953
chr19	52866049	52866150	chr19-52866049-DEL-102	chr19	52845001	52870000	0.191273	0	0	0	0.381642	0	0	0.32524	0	0.255219	0	0	0	0	0	0.464392	0	0	0.308749	0.272907	0	0	0	0	0	0	0	20	0.196088	0.196088
chr19	53317537	53317851	chr19-53317537-DEL-315	chr19	53315001	53340000	0.567479	1.23224	0.934516	1.218	0.959328	0.890793	0.842019	0.607313	0.987135	0	0.777103	0.808983	0.5906	0.727707	1.3712	1.44103	0.433207	1.21797	1.18523	0.913467	0.73819	0	0.963991	1.47167	0	0.838932	0.590028	3	0.764841	0.764841
chr19	53919697	53920972	chr19-53919697-DEL-1276	chr19	53895001	53920000	0.289418	0.869837	0.485005	0.670424	0.708293	0.63478	0.246506	0.151196	0.652588	0.555718	0.659478	0.395146	0.706379	0	1.47743	0.472366	1.14427	0	0.615782	0.458468	0.431995	0.259836	0.210185	0.476016	0.683999	1.08712	0.360553	2	0.0769231	0.0769231
chr19	54471909	54472019	chr19-54471909-DEL-111	chr19	54455001	54480000	0.880947	2.28721	2.32022	1.72256	2.19363	2.17232	1.63279	1.0444	1.89983	2.17581	1.66656	2.02201	1.64387	1.92335	2.08523	1.74942	1.72516	2.21316	1.41754	1.98068	1.94665	2.07074	1.43463	2.05973	2.34255	1.61136	1.75351	0	0.75263	0.75263
chr19	55147346	55147418	chr19-55147346-DEL-73	chr19	55130001	55155000	0.250034	0.257221	0	0.746655	0	0.584914	0.242535	0.669864	0.425715	0.697047	0.733024	0.556386	0.655741	0	0.36412	0	0	0.442941	0.638241	0.578093	0.760341	0.861424	0.43929	0	0	0.393587	1.08989	7	0.33388	0.571611
chr19	55147346	55147418	chr19-55147346-DEL-73	chr19	55140001	55165000	0.250034	0.257221	0.632136	0.746655	0.365611	0	0.242535	0	0	0	0.733024	0	0.655741	0.481004	0	0	0.364724	0.442941	0	0.578093	0.760341	0.861424	0.43929	0	1.13937	0.393587	1.08989	9	0.571611	0.571611
chr19	55159746	55159819	chr19-55159746-DEL-74	chr19	55140001	55165000	0.250034	0.257221	0.632136	0.746655	0.365611	0	0.242535	0	0	0	0.733024	0	0.655741	0.481004	0	0	0.364724	0.442941	0	0.578093	0.760341	0.861424	0.43929	0	1.13937	0.393587	1.08989	9	0.97831	0.97831
chr19	55508639	55508712	chr19-55508639-DEL-74	chr19	55500001	55525000	0.712468	0	1.05009	0.782835	1.04908	0.889486	1.00671	0.899813	0.658184	1.02584	0	0.844535	0	1.05162	1.21119	0.6662	1.13568	0	0	1.34139	0	0	1.13057	1.693	1.1397	0	0.986021	8	0.667254	0.667254
chr19	55508639	55508786	chr19-55508639-DEL-148	chr19	55500001	55525000	0.712468	0	1.05009	0.782835	1.04908	0.889486	1.00671	0.899813	0.658184	1.02584	0	0.844535	0	1.05162	1.21119	0.6662	1.13568	0	0	1.34139	0	0	1.13057	1.693	1.1397	0	0.986021	8	0.929236	0.929236
chr19	56069593	56069642	chr19-56069593-DEL-50	chr19	56050001	56075000	1.08279	1.90088	2.62296	1.79599	2.37477	2.27373	1.60792	2.13363	2.18556	2.37746	2.04916	2.59107	2.42119	2.25022	2.35711	2.37209	2.22479	2.33711	2.42499	2.47192	2.05366	2.39954	1.62757	2.18421	2.58478	2.19476	2.35025	0	0.94	0.94
chr19	56176451	56176650	chr19-56176451-DEL-200	chr19	56160001	56185000	0.64914	1.12882	1.39658	1.32496	1.5309	1.08176	0.808874	1.22505	0.960023	1.38938	1.10239	1.14893	1.59598	1.1002	1.35583	0.662987	1.06172	1.29349	1.41134	1.17441	1.08825	0.894189	1.3237	0.982589	1.22357	1.1961	1.37211	0	0.33388	0.33388
chr19	56176460	56176509	chr19-56176460-DEL-50	chr19	56160001	56185000	0.64914	1.12882	1.39658	1.32496	1.5309	1.08176	0.808874	1.22505	0.960023	1.38938	1.10239	1.14893	1.59598	1.1002	1.35583	0.662987	1.06172	1.29349	1.41134	1.17441	1.08825	0.894189	1.3237	0.982589	1.22357	1.1961	1.37211	0	0.856355	0.856355
chr19	56339290	56339425	chr19-56339290-DEL-136	chr19	56335001	56360000	0.629233	1.40492	1.27603	0	1.10425	1.45258	0.910063	1.05667	0.968749	0	1.12037	0	0	1.25471	1.16209	0.799442	0	0	0	1.25594	1.18567	1.31965	0	0	1.44747	0	0	11	0.539953	0.539953
chr19	56355089	56358553	chr19-56355089-DEL-3465	chr19	56335001	56360000	0.629233	1.40492	1.27603	0	1.10425	1.45258	0.910063	1.05667	0.968749	0	1.12037	0	0	1.25471	1.16209	0.799442	0	0	0	1.25594	1.18567	1.31965	0	0	1.44747	0	0	11	0.949802	0.949802
chr19	57169124	57169335	chr19-57169124-DEL-212	chr19	57165001	57190000	0.464016	1.11563	0.871138	0.742988	0.721199	0.381323	0.917676	1.37334	1.12076	0.894424	0.81064	0.986546	0.737218	0.590172	0.682374	0.89171	1.28678	0.836478	0.781673	0.771295	0.974945	0.725574	0.897455	0.538737	0.586084	0.726365	0.74596	0	0.596695	0.596695
chr19	57171948	57172122	chr19-57171948-DEL-175	chr19	57165001	57190000	0.464016	1.11563	0.871138	0.742988	0.721199	0.381323	0.917676	1.37334	1.12076	0.894424	0.81064	0.986546	0.737218	0.590172	0.682374	0.89171	1.28678	0.836478	0.781673	0.771295	0.974945	0.725574	0.897455	0.538737	0.586084	0.726365	0.74596	0	0.96	0.96
chr19	57482446	57482522	chr19-57482446-DEL-77	chr19	57460001	57485000	0.258785	0	0.452656	0.431947	0	0.369292	0.564747	0	0	0.138781	0	0.268253	0.405557	0	0	0.5325	0.445854	0.416763	0	0.270797	0.46542	0	0	0.560913	0	0.240009	0.525917	11	0.65868	0.65868
chr19	58168310	58168388	chr19-58168310-DEL-79	chr19	58145001	58170000	0.496879	0	0	1.13417	1.30422	1.22627	0	0	0.764913	1.26839	1.29257	1.01778	0.752608	0	0.605407	1.26789	0	0	1.09152	1.0096	1.13018	0	0	1.02602	1.55507	1.20369	0	10	0.949802	0.949802
chr2	197427	197595	chr2-197427-DEL-169	chr2	195001	220000	0.381101	0.715632	0.841033	0.446823	1.04484	1.55492	0	0.435719	0.952044	0.733383	0	1.03446	0.815017	0.774865	1.12836	0.979076	0.960281	0.776265	0	0.774269	1.1065	0	0	0.899692	0.932587	1.12206	0	6	0.613969	0.613969
chr2	296362	296424	chr2-296362-DEL-63	chr2	295001	320000	0.494812	1.21858	1.03704	1.3597	1.32526	1.2391	0	1.13517	0.793345	1.02335	0.835971	1.07266	0.790611	1.14885	0.663744	1.26606	0.585504	0.914081	0.484862	0.948416	0.885702	0.817418	0.560357	0.430187	1.06362	0.795468	0.79924	1	0.574383	0.574383
chr2	671354	671618	chr2-671354-DEL-265	chr2	655001	680000	0.548702	1.0129	1.10976	1.20181	1.1997	0.960204	1.24682	1.10981	1.22271	1.31974	0.856719	1.10566	1.28964	0.99403	0.805298	1.0438	0.623661	1.30036	1.06282	0.78027	1.4005	0.970485	0.882695	0.908166	0.804177	0.714757	1.05479	0	0.15974	0.15974
chr2	3319823	3319899	chr2-3319823-DEL-77	chr2	3295001	3320000	0.260325	0.604154	0.660325	0	0	0.742355	0.643276	0	0.537954	0	0	0	0	0.547274	0	0	0	0	0	0.730486	0.621136	0.550137	0.945681	0.999196	0.649739	0.502796	1.00793	12	0.211556	0.211556
chr2	3671555	3671710	chr2-3671555-DEL-156	chr2	3650001	3675000	0.657597	1.52911	1.4832	1.03725	0.982859	1.46369	1.28311	0	0.853915	1.22173	1.2691	1.10861	0.954173	0	1.11507	1.33709	1.48286	1.76592	1.15412	1.2142	0	1.68515	1.20772	0.987924	1.44835	0.93748	1.2561	3	0.775995	0.775995
chr2	3671986	3672609	chr2-3671986-DEL-624	chr2	3650001	3675000	0.657597	1.52911	1.4832	1.03725	0.982859	1.46369	1.28311	0	0.853915	1.22173	1.2691	1.10861	0.954173	0	1.11507	1.33709	1.48286	1.76592	1.15412	1.2142	0	1.68515	1.20772	0.987924	1.44835	0.93748	1.2561	3	0.165427	0.165427
chr2	3837623	3837740	chr2-3837623-DEL-118	chr2	3815001	3840000	0.283239	0.748387	0.587691	0	0.12024	0.724317	0	0	0.567855	0.804436	0.461206	0	0.765815	0.564402	0	0.805697	0.700904	0.482007	0.801684	0	0.745359	0.707412	0	0.391335	0.30111	0.426348	0	8	0.0356019	0.0356019
chr2	7198445	7198507	chr2-7198445-DEL-63	chr2	7185001	7210000	0.224064	0.362504	0	0.0662314	0.333226	0.481102	0.489838	0.202732	0.245831	0.646543	0	0.185989	0.243364	0.148818	0.356695	0.319574	0.460635	0.32733	0.524176	0	0	0.938477	0.28309	0.374048	0.19398	0.326078	0	5	0.736605	0.736605
chr2	9406032	9406199	chr2-9406032-DEL-168	chr2	9400001	9425000	0.55781	1.38148	1.28146	1.25814	1.0472	1.1254	0.61657	1.096	1.11128	1.30164	0.99611	1.13587	0.664903	0.801069	1.24862	0	1.13374	1.05277	0.86458	1.01637	0	1.18957	0.643992	0.960447	1.08607	0.870468	1.22537	2	0.312319	0.312319
chr2	10697651	10697792	chr2-10697651-DEL-142	chr2	10675001	10700000	0.555805	0.394701	1.22054	0.968916	1.31911	1.1799	1.05186	0.933285	0.995203	1.29612	1.07133	1.06508	1.04547	1.00392	1.33183	1.53247	1.11482	1.30979	1.01134	0.898742	0.925636	1.14101	0.884352	1.11216	1.06173	0.727993	0.989002	0	0.198164	0.198164
chr2	30331902	30331961	chr2-30331902-DEL-60	chr2	30330001	30355000	0.347434	0.500481	0.633473	0	0.727618	0.611251	0.349293	0.80422	0.613901	0.592502	0.329805	0.88581	0.4643	0.418255	0.406592	0	0.815692	0.342543	0.704079	0.50493	0	0.942597	0.470009	0	0.744367	0.214791	0.602304	4	1	1
chr2	32939881	32940027	chr2-32939881-DEL-147	chr2	32940001	32965000	0.357821	1.12108	0.787038	0.854474	0.71403	0.744087	0.612538	0.282304	0.643597	0.31597	0.563742	0.772279	0.458548	0.573339	0.691401	0.631529	0.802897	0.976725	0.535854	0.883149	0.718323	0.761024	0.541115	0.792203	0.429041	0.413977	0.983226	0	0.156539	0.156539
chr2	36505308	36505561	chr2-36505308-DEL-254	chr2	36505001	36530000	0.372823	0.387342	0.634073	0.596332	0.733787	0.763454	0.668954	0.465561	0.348159	0.708995	0.551767	0.543533	0.595364	0.829338	0.558806	0.643047	0.753427	0.776984	0.987071	0.771975	0.477549	0.88644	0.644172	0.832554	0.762681	0.717891	0.895699	0	0.925997	0.925997
chr2	36974778	36974831	chr2-36974778-DEL-54	chr2	36955001	36980000	0.302667	0	0.628175	0.27316	0	0.487321	0.240943	0.431527	0	0	0	0.261788	0.396404	0.751267	0.776783	0.616625	0.507544	0	0	0.256929	0	0.584078	0.24853	0.536424	0.606305	0.395312	0.343171	8	0.273981	0.273981
chr2	37249577	37249643	chr2-37249577-DEL-67	chr2	37230001	37255000	0.197593	0.161241	0	0.343781	0.281015	0.262696	0.292073	0.372034	0	0.66072	0.439126	0.346539	0.404627	0.477734	0	0	0.210247	0.339954	0.10072	0	0.0768445	0.042987	0.328758	0.576861	0.491283	0	0.673211	6	0.409486	0.409486
chr2	37519944	37520015	chr2-37519944-DEL-72	chr2	37520001	37545000	0.465752	0.759124	1.0081	0.947288	0.62192	0.913508	1.1384	1.07652	1.0339	1.33391	1.07477	0.668045	1.24704	0.764246	0	1.02669	0.826038	0.823992	0.834103	0.918242	0	0.729114	0	1.74816	0.879001	0.794849	1.08504	3	0.138127	0.138127
chr2	37813769	37813824	chr2-37813769-DEL-56	chr2	37810001	37835000	0.466667	0.921112	0.592052	0.447276	0	0.648448	0.99045	0.798177	1.11259	0.886791	0.929237	0.511052	0.422841	0.617429	0.739785	0.859126	0.727517	0.659074	0.685585	0.644599	0.81565	0.693904	0.825915	0.832177	0.655318	0.596228	0.957025	1	0.397104	0.397104
chr2	43132597	43132656	chr2-43132597-DEL-60	chr2	43110001	43135000	0.697028	1.68837	1.6083	1.81521	1.64279	1.64331	1.46439	1.44304	1.7365	1.28487	1.6491	1.6684	1.43823	1.93723	1.67975	2.10492	1.8441	1.6143	1.57032	1.88807	1.47019	1.5887	1.27684	1.2258	1.53344	1.54003	1.83072	0	0.0868575	0.0868575
chr2	43871112	43871375	chr2-43871112-DEL-264	chr2	43865001	43890000	0.516448	1.09229	0.830917	0.900839	1.0989	0.937127	0.666812	0.933869	0.832634	1.31901	0.90506	1.02773	0.893823	1.03265	1.34608	1.033	1.07244	0.863108	0.76389	1.00305	1.24616	1.19199	0.994784	1.62413	1.42146	0.591066	1.14038	0	0.850137	0.850137
chr2	44556449	44556769	chr2-44556449-DEL-321	chr2	44540001	44565000	0.24303	0.883155	0.889763	0.469161	0.479447	0.520387	0.694847	0.591024	0.555494	0.472422	0.326199	0.48499	0.285434	0.604888	0.474038	0.601236	0	0.877004	0.383159	0.77387	0.779942	0.642505	0.43904	0.5863	0.580135	0.822651	0.625385	1	0.00335024	0.00335024
chr2	53398625	53400861	chr2-53398625-DEL-2237	chr2	53395001	53420000	0.245498	0.587224	0.46449	0.405962	0.713078	0.58252	0.64665	0.546551	0.470051	0.265552	0.533447	0	0.733072	0.509278	0.654829	0.592789	0.271148	0.688701	0.318165	0.723847	0.787521	0.684731	0.424396	0.544489	0.51655	0.634267	0.442412	1	0.777714	0.777714
chr2	53868487	53868555	chr2-53868487-DEL-69	chr2	53860001	53885000	0.211166	0.300886	0	0	0	0.152578	0	0	0	0.325486	0.513108	0	0	0	0	0	0	0	0	0	0	0	0	0.0740863	0	0.173293	0	20	0.604919	0.604919
chr2	57755094	57755151	chr2-57755094-DEL-58	chr2	57745001	57770000	0.345082	0	0	0	0	0	0	0	0	0	0	0	0	0	0.369884	0	0.902763	0	0	0	0	0	0	0	0	0	0	24	0.849089	0.849089
chr2	65600942	65601211	chr2-65600942-DEL-270	chr2	65595001	65620000	0.406937	0	0	0	1.35405	0	0	1.10771	0	1.29344	1.08928	1.07963	0.86012	1.34098	1.09227	0	1.01524	1.41857	0	1.112	0.716665	0	0	1.09693	0	0	0	13	0.551193	0.551193
chr2	68450686	68450750	chr2-68450686-DEL-65	chr2	68445001	68470000	1.56687	3.13798	3.01361	2.89668	3.06375	3.37449	2.74104	3.01608	2.80591	2.74517	3.08547	3.03033	2.89525	3.5203	3.50082	3.30398	3.6504	3.08766	2.43307	3.04036	2.79669	2.91588	3.02069	3.11789	2.6487	2.92821	3.16659	0	0.569474	0.569474
chr2	71164573	71164633	chr2-71164573-DEL-61	chr2	71145001	71170000	0.681464	1.30394	1.11199	1.16746	1.53383	1.1233	0.915227	1.25166	1.24164	1.19045	1.23624	1.09529	0.644065	1.09852	1.63919	1.25023	0.929311	1.20822	1.24964	0.922747	1.09597	1.40695	1.09422	1.51897	1.22968	0.884703	1.25645	0	0.721104	0.721104
chr2	73203804	73204115	chr2-73203804-DEL-312	chr2	73200001	73225000	0.410864	1.3566	1.60909	0	1.39661	1.62426	0	1.4794	1.74171	1.48611	1.49907	1.72768	1.58133	1.6717	1.39223	1.56716	1.75774	1.64572	1.65084	1.3778	1.14153	1.54066	0	1.82832	1.64191	1.30428	0	4	0.622736	0.622736
chr2	73302304	73302362	chr2-73302304-DEL-59	chr2	73280001	73305000	0.64625	1.03224	1.1629	0.574178	0.611216	0.930983	0.586086	0.758788	0.91545	0.933287	0.942636	0.854927	0.690722	1.09589	0.797091	0.776561	1.52972	0.875795	0.702484	0.533115	0.872086	0.791826	1.07038	1.11183	0.959821	0.67045	0.687743	0	0.156539	0.156539
chr2	74220626	74220949	chr2-74220626-DEL-324	chr2	74210001	74235000	0.798382	1.86247	1.66577	2.02887	2.25241	1.68674	1.48856	1.53647	1.42327	1.10196	1.70596	1.52456	1.45398	1.99967	1.49213	1.68906	1.71394	1.60891	1.36858	1.73018	1.67737	1.9293	1.52794	1.76014	1.79577	1.67022	1.93061	0	0.0568071	0.0568071
chr2	75712133	75712292	chr2-75712133-DEL-160	chr2	75700001	75725000	0.593531	1.5474	0.931817	1.15802	1.25949	1.54138	0.829214	1.29447	1.33057	1.08096	1.39706	0.973821	0.888915	1.18324	1.01952	1.51259	1.57505	1.14771	1.04949	1.07432	0.832326	1.44159	1.12414	1.37143	0.912097	0.961453	1.53992	0	0.910143	0.910143
chr2	75788497	75788576	chr2-75788497-DEL-80	chr2	75770001	75795000	0.44385	0.606805	0.108295	0	0.677409	0.349385	0	0	0	0.894128	0.458533	0	0.689323	0.877204	0.678152	0.171013	0	0.557833	0	1.26002	0	0.723041	0.765625	0.528085	0.859439	0.382285	0.767687	8	0.683178	0.683178
chr2	85712025	85712099	chr2-85712025-DEL-75	chr2	85710001	85735000	0.788857	1.16238	1.49318	1.32411	1.37785	1.4467	1.07012	1.3292	1.49333	1.40541	1.2105	1.38476	1.09778	1.25194	1.14844	1.21404	1.77156	1.25133	1.33923	1.60885	1.13922	1.8912	1.73991	1.45766	1.76415	1.2251	1.66123	0	1	1
chr2	85712025	85712249	chr2-85712025-DEL-225	chr2	85710001	85735000	0.788857	1.16238	1.49318	1.32411	1.37785	1.4467	1.07012	1.3292	1.49333	1.40541	1.2105	1.38476	1.09778	1.25194	1.14844	1.21404	1.77156	1.25133	1.33923	1.60885	1.13922	1.8912	1.73991	1.45766	1.76415	1.2251	1.66123	0	0.646084	0.646084
chr2	88729711	88732765	chr2-88729711-DEL-3055	chr2	88725001	88750000	0.394824	0	0	0	0	0	0	0	0	1.8755	0	0	0	0	0	0	0	0	0	0	1.85436	0	0	0	0	0	0	24	0.886154	0.886154
chr2	88832772	89142573	chr2-88832772-DEL-309802	chr2	88815001	88840000	1.38118	0	0	0	1.19766	0	1.12273	1.2635	2.6717	1.94265	0	1.50895	1.39013	2.18521	2.32346	0	0	2.58591	1.88185	1.81231	0	2.18742	1.94325	0	0	1.94518	0	11	0.0238462	0.0953846
chr2	88832772	89142573	chr2-88832772-DEL-309802	chr2	89030001	89055000	0.659187	0	2.11876	0	1.7847	0	0	0	0	0	0	0	2.03769	0	0.523143	0	0	0	5.52407	2.70909	0	2.74549	0	0	4.14046	0	0.457259	17	0.94	0.94
chr2	88832772	89142573	chr2-88832772-DEL-309802	chr2	89065001	89090000	0.228069	0	0	0	0	1.42535	2.75673	1.69182	0	0	0	2.04415	0	2.26397	0	0	0	2.6142	0	0	3.4968	0	0	0	0	2.8407	0	18	0.94	0.94
chr2	88832772	89142573	chr2-88832772-DEL-309802	chr2	88850001	88875000	1.03312	1.53268	3.19205	0	0	2.02538	0	0	0	0	0	1.50895	1.39013	0	0	0	0	0	0	0	4.25613	0	0	0	5.61646	0	2.1624	18	0.395385	0.790769
chr2	99487252	99488558	chr2-99487252-DEL-1307	chr2	99485001	99510000	0.867009	0	1.51626	1.53086	1.65075	1.74444	0	0	0	0	0	1.44306	0	0	0	1.50937	1.87868	1.59658	0	0	0	0	0	1.64675	0	1.4729	1.95446	15	0.251953	0.251953
chr2	102003376	102003471	chr2-102003376-DEL-96	chr2	101995001	102020000	0.823817	1.46514	1.00955	1.3043	0.735336	1.46103	0.999229	1.48375	1.60998	1.86553	1.1531	1.24981	1.94428	1.38206	0.997092	1.04785	0.720611	0.95849	1.19699	1.72451	0.774406	1.19291	1.42123	1.68893	1.01926	0.961586	1.15866	0	0.39464	0.39464
chr2	102706025	102706359	chr2-102706025-DEL-335	chr2	102700001	102725000	0.2925	0	0.59246	0	0.551358	0.480845	0	0.769196	0.383827	0	0.922727	0	0.760105	0.386469	0.227705	0.417176	0.82171	1.25662	0.98043	0	1.00848	1.48346	0.730833	0.374436	0	0	0	9	0.258462	0.258462
chr2	107887650	107888259	chr2-107887650-DEL-610	chr2	107865001	107890000	1.34844	0	0	3.05059	0	1.06613	0	0	0	0	0	0	1.77377	0	0	0	0	4.84294	7.05174	0	2.76954	0	1.44476	4.37124	0	2.35366	0	17	0.338342	0.338342
chr2	109520578	109520914	chr2-109520578-DEL-337	chr2	109505001	109530000	0.822557	1.5686	1.32998	0.989514	1.42976	1.76045	1.66497	1.50256	1.5598	1.22082	1.40898	0	0	1.50216	0	1.37267	1.79499	2.58887	1.41669	1.25855	0	2.62196	1.51935	1.79752	1.45651	1.40886	0	5	0.443029	0.443029
chr2	112114599	112114978	chr2-112114599-DEL-380	chr2	112105001	112130000	0.355693	0.424355	0.792157	0	0	0.540568	0.539207	0	0.535956	1.08953	0.637344	0.552718	0	0.430986	0	0.842656	0.537928	0.405007	0	0.569323	0.409825	0.649577	0.807083	1.44469	0.700808	0	0.337676	7	0.609783	0.609783
chr2	112114865	112114978	chr2-112114865-DEL-114	chr2	112105001	112130000	0.355693	0.424355	0.792157	0	0	0.540568	0.539207	0	0.535956	1.08953	0.637344	0.552718	0	0.430986	0	0.842656	0.537928	0.405007	0	0.569323	0.409825	0.649577	0.807083	1.44469	0.700808	0	0.337676	7	0.560362	0.560362
chr2	113130529	113130700	chr2-113130529-DEL-172	chr2	113115001	113140000	0.414457	0	0	0	0	0	0	0	0	0	0	0	0	0	0	0	0	0	0	0	0	0	0	0	0	0	0.740439	25	0.832626	0.832626
chr2	113393750	113396034	chr2-113393750-DEL-2285	chr2	113375001	113400000	0.552006	0	0	1.56019	1.10304	0	0.840596	0	0	0	0	0.442325	0	1.18855	0	0	0	0.371293	0.995638	1.30726	0	0	0.842416	0	0	1.42777	1.84747	15	0.386329	0.386329
chr2	113395016	113395142	chr2-113395016-DEL-127	chr2	113375001	113400000	0.552006	0	0	1.56019	1.10304	0	0.840596	0	0	0	0	0.442325	0	1.18855	0	0	0	0.371293	0.995638	1.30726	0	0	0.842416	0	0	1.42777	1.84747	15	0.0849092	0.0849092
chr2	117041375	117041428	chr2-117041375-DEL-54	chr2	117040001	117065000	0.191146	0.0598249	0	0	0	0	0	0	0.571558	0	0.322001	0	0.230225	0	0	0	0.149345	0	0	0.117341	0.26438	0	0	0.92951	0	0.187927	0	17	0.75263	0.75263
chr2	117043421	117043517	chr2-117043421-DEL-97	chr2	117040001	117065000	0.191146	0.0598249	0	0	0	0	0	0	0.571558	0	0.322001	0	0.230225	0	0	0	0.149345	0	0	0.117341	0.26438	0	0	0.92951	0	0.187927	0	17	0.128523	0.128523
chr2	118867495	118867547	chr2-118867495-DEL-53	chr2	118860001	118885000	0.729358	1.4679	1.34428	1.4693	1.00389	1.07267	1.06857	0.966899	1.40208	1.07757	1.00537	1.05488	1.12172	1.24523	0.540599	1.54494	1.24636	1.43519	1.34762	0.801575	0.983644	1.8506	1.29779	1.02447	1.37047	1.23122	1.90606	0	0.65868	0.65868
chr2	126971667	126971731	chr2-126971667-DEL-65	chr2	126960001	126985000	0.326606	0.275641	0.707148	0.679558	0.350091	0.61581	0.390159	0.514329	0.540901	0.686752	0.357389	0.528103	0.571707	0.771032	0.648892	0.577119	0.369075	0.463896	0.525175	0.363315	0.438123	0.277737	0.611803	0.961648	0.275054	0.375662	0	1	0.307692	0.307692
chr2	135465183	135465325	chr2-135465183-DEL-143	chr2	135455001	135480000	0.201356	0.871625	0.258891	0.45552	0	0.630613	0.582664	0.322679	0	0	0.299934	0	0.370872	0	0	0.582471	0	0.714276	0.132691	0	0	0	0	0.390645	0.628411	0.287228	0.356799	11	0.297233	0.297233
chr2	156415865	156416043	chr2-156415865-DEL-179	chr2	156415001	156440000	0.186787	0.515965	0.5941	0.587639	0.676849	0.634951	0.488878	0.474887	0.544806	0.659262	0.796644	0.575219	0.244034	0.692733	0	0.417086	0.654856	0.555741	0.33105	0.360238	0.397466	0.417001	0.529467	0.631155	0.266531	0.661103	0.449623	1	0.200535	0.200535
chr2	159283569	159283663	chr2-159283569-DEL-95	chr2	159270001	159295000	0.211213	0	0	0.416495	0.0684333	0.411772	0	0	0	0.241872	0.288808	0.215912	0.357825	0.13358	0.0873468	0	0	0	0.355033	0.384517	0.387522	0.471805	0.0890345	0.563717	0	0	0.426557	10	0.897126	0.897126
chr2	160089759	160089886	chr2-160089759-DEL-128	chr2	160080001	160105000	0.371487	0.87124	0	0	0.699779	0.876181	0.529039	0	0	0.747618	0	0	0.91135	0	0	0	0.523419	0.824137	0.98796	1.02547	0	0	0.894796	0	0.649454	0	0	14	0.630785	0.630785
chr2	170135503	170135811	chr2-170135503-DEL-309	chr2	170130001	170155000	0.265881	0.663557	0.587638	0	0.195415	0.189227	0	0.0621797	0.514616	0.348718	0	0.393805	0	0	0.39254	0.401851	0	0.560787	0	0.224338	0	0.610696	0	0	0.41231	0.231456	0.494013	10	0.821365	0.821365
chr2	170149567	170149646	chr2-170149567-DEL-80	chr2	170130001	170155000	0.265881	0.663557	0.587638	0	0.195415	0.189227	0	0.0621797	0.514616	0.348718	0	0.393805	0	0	0.39254	0.401851	0	0.560787	0	0.224338	0	0.610696	0	0	0.41231	0.231456	0.494013	10	0.97831	0.97831
chr2	170150227	170150353	chr2-170150227-DEL-127	chr2	170130001	170155000	0.265881	0.663557	0.587638	0	0.195415	0.189227	0	0.0621797	0.514616	0.348718	0	0.393805	0	0	0.39254	0.401851	0	0.560787	0	0.224338	0	0.610696	0	0	0.41231	0.231456	0.494013	10	0.821365	0.821365
chr2	171808202	171808311	chr2-171808202-DEL-110	chr2	171795001	171820000	0.206223	0.318289	0.465113	0.346007	0.47232	0.398929	0	0	0.267378	0.834044	0.191907	0.370703	0	0	0.0360105	0	0	0.395525	0.295206	0	0	0.84834	0.227695	0	0.730997	0.170085	0.508782	9	0.117926	0.117926
chr2	179200621	179216831	chr2-179200621-DEL-16211	chr2	179205001	179230000	0.225742	0	0.265325	0	0	0	0.27588	0.134548	0.183257	0	0	0	0.328317	0.565273	0	0	0.894211	0	0.511724	0.464711	0	0	0	0	0	0.414822	0	16	0.112933	0.112933
chr2	190383557	190383859	chr2-190383557-DEL-303	chr2	190370001	190395000	0.520478	1.22771	1.11392	1.24043	1.0162	1.35469	0.915354	0.793655	0.936447	1.06861	0.612403	0.944598	0.92478	1.05794	0.431443	0.862615	1.18936	1.29516	0.820164	1.06526	0.939286	1.17798	0.948664	1.46895	0.954489	1.01133	1.19343	0	0.812308	0.812308
chr2	190639370	190639474	chr2-190639370-DEL-105	chr2	190635001	190660000	0.301138	0.46596	0.308228	0.371859	0	0.752834	0.359603	0.461469	0.418599	0.357822	0.594508	0.412601	0	0.441006	0.523606	0.539088	0.596091	0.49277	0	0.475603	0	0.810017	0	0.48444	0.445304	0	0	7	0.821365	0.821365
chr2	191694678	191695005	chr2-191694678-DEL-328	chr2	191685001	191710000	0.933745	1.457	1.52232	2.07581	1.59349	1.75388	1.19536	1.43317	1.48663	1.55251	1.72725	1.40532	1.37677	1.40926	1.70656	1.38515	1.40219	1.19736	1.6393	1.42209	1.17636	1.50991	1.31238	1.60776	1.40301	1.36639	1.44768	0	0.108919	0.108919
chr2	191697463	191697797	chr2-191697463-DEL-335	chr2	191685001	191710000	0.933745	1.457	1.52232	2.07581	1.59349	1.75388	1.19536	1.43317	1.48663	1.55251	1.72725	1.40532	1.37677	1.40926	1.70656	1.38515	1.40219	1.19736	1.6393	1.42209	1.17636	1.50991	1.31238	1.60776	1.40301	1.36639	1.44768	0	0.108919	0.108919
chr2	195314725	195314799	chr2-195314725-DEL-75	chr2	195305001	195330000	0.45906	1.27393	0.476182	1.23465	0.953881	1.37961	1.39012	1.51831	1.45616	1.93811	0.65548	0.827642	1.24087	1.40298	1.29724	0.942419	0.724254	0.763563	0.815706	1.4029	1.31375	0.801991	0.674693	1.3965	0.63066	0.901352	0.855208	0	0.63402	0.63402
chr2	196749893	196750224	chr2-196749893-DEL-332	chr2	196745001	196770000	0.183537	0	0.557693	0.5147	0.497725	0	0	0.500233	0	0	0.347009	0	0	0	0.492941	0	0.874515	0.578671	0	0.723405	0.291544	0	0	0.657016	0	0	0	15	0.957876	0.957876
chr2	198849484	198849533	chr2-198849484-DEL-50	chr2	198845001	198870000	0.185555	0.297402	0	0.207701	0	0.319943	0	0	0.360611	0	0.131784	0.252758	0.248629	0.329364	0.202	0	0.438813	0.399817	0	0.243097	0.536765	0.140221	0.397753	0	0.298498	0	0.266307	9	0.384615	0.384615
chr2	201856926	201857246	chr2-201856926-DEL-321	chr2	201840001	201865000	0.339265	0	0.721164	0.591405	0	0.705594	0.755044	1.23077	0.641216	0.630166	0	0	0.60549	0.658262	0.495611	0	0	0	0.327532	0.669995	0.633439	0.42173	0.3083	1.21333	0.247586	0.849855	0.751075	7	0.604919	0.604919
chr2	204320532	204320595	chr2-204320532-DEL-64	chr2	204310001	204335000	0.185338	0	0	0.349993	0.544311	0.4531	0	0.193319	0.32598	0	0	0	0.291229	0.353224	0.622746	0	0.429934	0	0	0	0.29845	0.219642	0.558138	0.523337	0.354607	0.388072	0	11	0.461538	0.461538
chr2	206172630	206173132	chr2-206172630-DEL-503	chr2	206150001	206175000	1.05247	2.06467	1.48064	1.79887	2.43928	2.14142	1.34388	1.53472	1.54761	1.62541	2.06006	1.60089	1.55693	1.46514	1.18814	1.4964	2.15254	1.79075	1.66095	1.82636	1.28474	2.32201	1.85031	1.84072	1.62071	1.34886	2.2507	0	0.93959	0.93959
chr2	206172905	206173037	chr2-206172905-DEL-133	chr2	206150001	206175000	1.05247	2.06467	1.48064	1.79887	2.43928	2.14142	1.34388	1.53472	1.54761	1.62541	2.06006	1.60089	1.55693	1.46514	1.18814	1.4964	2.15254	1.79075	1.66095	1.82636	1.28474	2.32201	1.85031	1.84072	1.62071	1.34886	2.2507	0	0.363506	0.363506
chr2	206172949	206173037	chr2-206172949-DEL-89	chr2	206150001	206175000	1.05247	2.06467	1.48064	1.79887	2.43928	2.14142	1.34388	1.53472	1.54761	1.62541	2.06006	1.60089	1.55693	1.46514	1.18814	1.4964	2.15254	1.79075	1.66095	1.82636	1.28474	2.32201	1.85031	1.84072	1.62071	1.34886	2.2507	0	0.551193	0.551193
chr2	206375041	206375414	chr2-206375041-DEL-374	chr2	206375001	206400000	0.275623	0.290247	0.331182	0.497047	0.566282	0.323295	0.282711	0	0	0.367657	0.422263	0	0.453305	0.31832	0.507807	0	0.579126	0.702605	0.202164	0.380455	0.453938	1.22288	0	0	0	0	0.471081	8	0.667254	0.667254
chr2	207476202	207476253	chr2-207476202-DEL-52	chr2	207465001	207490000	0.666506	1.35531	1.49675	1.2828	1.08537	1.626	0	1.26794	1.3402	1.36015	1.30791	1.29698	1.27902	1.49308	1.26049	1.34287	1.51545	1.08792	1.41326	1.18011	1.34148	1.3694	1.29117	1.5383	1.50736	1.25273	1.63201	1	0.78101	0.78101
chr2	212665607	212665743	chr2-212665607-DEL-137	chr2	212660001	212685000	0.628129	1.1118	1.09587	1.38265	1.4641	0.807245	0.968851	0.952877	0.98837	1.93403	1.28266	1.35319	1.04936	1.30452	0.535973	0.892519	1.33386	1.58521	1.07991	0.980462	1.21035	1.84295	1.61263	1.19838	1.17056	0	0.867569	1	0.736605	0.736605
chr2	219456894	219456961	chr2-219456894-DEL-68	chr2	219445001	219470000	0.294117	0	0	0	0	0	0	0	0	0	0	0	0	0	0	0	0	0	0	0	0	0	0	0	0	0	0.568129	25	0.865552	0.865552
chr2	222556763	222556843	chr2-222556763-DEL-81	chr2	222555001	222580000	0.276205	0.612542	0.382274	0.437979	0	0.695889	0	0.81015	0.368833	0.542894	0.805879	0.573655	0.26807	0.519117	0	0.740953	0.688357	0.731277	0.481039	0	0	0.871085	0.564483	0.752718	0.797082	0	0.305984	6	0.307692	0.307692
chr2	224656164	224658438	chr2-224656164-DEL-2275	chr2	224645001	224670000	0.603214	1.18825	1.25302	1.40759	0.944353	1.00792	1.57961	0.905957	0.821379	1.05498	0.935272	1.22603	0.624331	1.20791	1.04545	1.48802	1.02417	1.16733	1.10292	1.1702	0.906084	1.10256	1.17778	1.62495	0.931567	0.943173	1.35514	0	0.287174	0.287174
chr2	227777789	227777880	chr2-227777789-DEL-92	chr2	227755001	227780000	0.654154	1.00407	0.981294	0.458022	1.00888	0.994278	0.806218	0.79496	1.02614	1.14499	0.987365	0.838813	0.684356	0.970975	0.869303	0.49555	2.1511	1.43003	1.00074	0.985551	1.09709	1.41252	1.67526	1.06196	2.26158	1.17236	1.1059	0	0.297233	0.297233
chr2	229743176	229743225	chr2-229743176-DEL-50	chr2	229740001	229765000	0.41922	1.28953	1.33108	0	1.22009	1.22979	0.929745	0.843684	0	1.08826	1.28526	1.16106	1.34838	1.28443	1.32877	1.46544	1.01908	1.13868	1.06398	1.51726	1.01599	1.06961	1.0638	1.2321	1.04309	0	1.10262	3	0.185689	0.185689
chr2	230979942	230980080	chr2-230979942-DEL-139	chr2	230980001	231005000	1.38931	1.0343	1.53966	1.40049	1.90293	1.7596	1.45306	1.8193	1.95228	1.42691	1.71958	1.58614	1.51794	1.70327	1.57675	1.84646	1.40488	1.5969	1.28326	1.93106	1.71192	1.69722	1.20927	1.52512	1.39911	1.48075	1.39762	0	0.208741	0.208741
chr2	231824914	231825805	chr2-231824914-DEL-892	chr2	231800001	231825000	1.10372	1.61292	1.17507	1.08944	1.34139	1.11869	0	1.23308	1.12344	1.8004	0.995576	1.5551	0.913751	0.963086	2.27412	1.09269	1.11114	1.9623	0.997179	0.871073	1.2985	1.38252	1.06964	2.21778	0.885193	1.10815	1.54916	1	0.821365	0.821365
chr2	232333150	232333236	chr2-232333150-DEL-87	chr2	232315001	232340000	0.488988	1.3194	1.14537	0.72715	1.47615	1.09294	1.05216	1.08181	0.801458	1.32183	1.0274	0.973889	1.17489	1.14699	0.923845	1.86905	1.25542	0.972826	1.42368	0.911323	1.48442	1.18518	1.03849	1.56207	1.19484	1.17247	1.05035	0	0.119502	0.119502
chr2	233143974	233144097	chr2-233143974-DEL-124	chr2	233130001	233155000	0.20887	0.823781	0.690938	0	0.502471	0.683724	0.29329	0.882092	0.575292	0.28102	0.776603	0.497922	0	0.29319	0	0.614374	0.354623	0	0.397471	0.648067	0	0.792384	0.711478	0.569546	0.657128	0.426038	0.784779	5	0.882274	0.882274
chr2	233463397	233463515	chr2-233463397-DEL-119	chr2	233445001	233470000	0.420527	1.17027	0.437937	0.766796	1.05154	1.21511	0.816165	1.06368	0.605698	0	1.12561	0.7391	0	0.985799	1.42732	0	1.18856	0.773127	0.999357	1.20271	1.02	0.75292	0.712752	1.09257	0.876277	0.999172	1.1278	3	0.721104	0.721104
chr2	233722832	233725340	chr2-233722832-DEL-2509	chr2	233710001	233735000	0.334524	0	0	0	0.492761	0.410837	0.451288	0	0.301895	0.633662	0.309829	0	0.442713	0.593433	0.838479	0	0.377339	0.393972	0	0.560561	0.411124	0.448789	0.562993	0	0.30438	0	0.344884	9	0.683178	0.683178
chr2	234544704	234544792	chr2-234544704-DEL-89	chr2	234530001	234555000	0.263383	0	0	1.62716	0	0	0	1.52765	0	1.2251	0	0	1.11169	1.67253	0	1.51883	1.1574	0	0	0	0	1.65024	0	1.30687	0	0	0	17	0.957876	0.957876
chr2	236491136	236491219	chr2-236491136-DEL-84	chr2	236490001	236515000	0.803382	1.18718	1.31222	1.34899	1.54407	1.15934	1.38235	0.96157	1.73842	1.70627	1.61394	1.54026	1.53353	1.55748	0	1.25309	1.71289	1.88779	1.56784	1.4725	1.56667	1.46138	1.14406	1.80348	1.36827	1.81958	1.82346	1	0.457994	0.457994
chr2	237593001	237593177	chr2-237593001-DEL-177	chr2	237575001	237600000	0.931955	1.48188	1.23993	2.15435	1.86025	1.91661	1.50931	1.72267	1.72022	1.28574	1.42082	1.58337	1.47373	1.68474	1.39982	1.6316	1.57353	1.93268	1.76117	1.62556	1.09181	2.03998	1.55847	1.93827	1.80883	1.27872	1.67497	0	0.120949	0.120949
chr2	237598094	237598210	chr2-237598094-DEL-117	chr2	237575001	237600000	0.931955	1.48188	1.23993	2.15435	1.86025	1.91661	1.50931	1.72267	1.72022	1.28574	1.42082	1.58337	1.47373	1.68474	1.39982	1.6316	1.57353	1.93268	1.76117	1.62556	1.09181	2.03998	1.55847	1.93827	1.80883	1.27872	1.67497	0	0.595155	0.595155
chr2	237957350	237957423	chr2-237957350-DEL-74	chr2	237950001	237975000	0.281619	0.508579	0.302533	0.674645	0	0.449867	0	0.60162	0	0	0	0	0.373109	0	0	0	0.47498	0.418518	0.491786	0.538353	0.241752	0.524153	0	0.462017	0.415874	0.469751	0	11	0.180439	0.180439
chr2	239017396	239017445	chr2-239017396-DEL-50	chr2	239005001	239030000	0.31692	0.869949	0.541409	0.543273	0.359893	0.564127	0	0.288821	0.740061	0.675246	0.54119	0.570831	0	0.653572	0.355044	1.14877	0	0	0.454223	0.560058	0	0.853586	0.654471	0	0.529421	0.47281	0.87371	6	0.335952	0.335952
chr2	239914658	239914771	chr2-239914658-DEL-114	chr2	239900001	239925000	0.20592	0.432912	0	0	0.50288	0.515401	0	0	0.647352	0	0	0.262627	0.212782	0.562296	0	0	0.390511	0	0.669418	0.376316	0.462935	0.849213	0	0.219015	0.438543	0.394114	0	11	0.461538	0.461538
chr2	240042132	240042635	chr2-240042132-DEL-504	chr2	240020001	240045000	0.598631	1.03963	1.36286	1.19589	1.18817	1.50377	1.05176	0.960914	1.36826	1.58209	1.47798	1.32118	0.797826	1.09315	1.24457	0	1.50103	1.08804	1.40763	1.30031	1.07445	1.6757	0.970117	1.33803	1.34609	1.13416	1.34257	1	0.307692	0.307692
chr2	240147553	240148075	chr2-240147553-DEL-523	chr2	240145001	240170000	0.659204	1.3298	1.52969	1.46002	1.29337	1.63785	1.54008	1.21553	1.20918	1.64052	1.49551	1.27786	1.39316	1.63748	1.97976	0	1.54648	1.57862	1.05276	1.50186	1.58329	2.37153	1.51305	1.49391	1.27939	0	1.67656	2	0.798805	0.798805
chr2	240157840	240158008	chr2-240157840-DEL-169	chr2	240145001	240170000	0.659204	1.3298	1.52969	1.46002	1.29337	1.63785	1.54008	1.21553	1.20918	1.64052	1.49551	1.27786	1.39316	1.63748	1.97976	0	1.54648	1.57862	1.05276	1.50186	1.58329	2.37153	1.51305	1.49391	1.27939	0	1.67656	2	0.135315	0.135315
chr2	240158395	240158621	chr2-240158395-DEL-227	chr2	240145001	240170000	0.659204	1.3298	1.52969	1.46002	1.29337	1.63785	1.54008	1.21553	1.20918	1.64052	1.49551	1.27786	1.39316	1.63748	1.97976	0	1.54648	1.57862	1.05276	1.50186	1.58329	2.37153	1.51305	1.49391	1.27939	0	1.67656	2	0.976447	0.976447
chr2	240498470	240498538	chr2-240498470-DEL-69	chr2	240485001	240510000	0.387796	0	0	1.30214	0	0	0.53671	0.824398	0	0.429768	0.806737	0.77643	0	1.07198	0	1.09661	0	0	1.03101	0	0	0	0	0	0	0	0.840734	16	0.882274	0.882274
chr2	240623387	240623462	chr2-240623387-DEL-76	chr2	240610001	240635000	0.220352	0	0	0.652667	0	0	0	0	0	0	0	0	0	0	0	0	0	0	0	0	0	0	0	0	0	0	0	25	0.968696	0.968696
chr2	240842606	240842903	chr2-240842606-DEL-298	chr2	240830001	240855000	0.223383	0.668935	0.652092	0.766293	0.496449	0.570002	0.621406	0.832899	0.746024	0	0	0.922018	0.38875	0	0	0.869216	0.417822	0.658123	0	0.461933	0	0.899122	1.00987	0	0.416427	0.771745	0.756591	7	0.307692	0.307692
chr2	240848087	240848329	chr2-240848087-DEL-243	chr2	240830001	240855000	0.223383	0.668935	0.652092	0.766293	0.496449	0.570002	0.621406	0.832899	0.746024	0	0	0.922018	0.38875	0	0	0.869216	0.417822	0.658123	0	0.461933	0	0.899122	1.00987	0	0.416427	0.771745	0.756591	7	0.789741	0.789741
chr2	240976512	240976646	chr2-240976512-DEL-135	chr2	240975001	241000000	0.208363	0.521312	0.167245	0	0	0.366228	0	0.562373	0.618109	0	0	0	0	0.589131	1.08718	0	0.639278	0	0	0	0	0.789049	0	0	0.465071	0.897498	0.29108	14	0.402547	0.402547
chr2	240977007	240978806	chr2-240977007-DEL-1800	chr2	240975001	241000000	0.208363	0.521312	0.167245	0	0	0.366228	0	0.562373	0.618109	0	0	0	0	0.589131	1.08718	0	0.639278	0	0	0	0	0.789049	0	0	0.465071	0.897498	0.29108	14	0.704507	0.704507
chr2	240977367	240977501	chr2-240977367-DEL-135	chr2	240975001	241000000	0.208363	0.521312	0.167245	0	0	0.366228	0	0.562373	0.618109	0	0	0	0	0.589131	1.08718	0	0.639278	0	0	0	0	0.789049	0	0	0.465071	0.897498	0.29108	14	0.409486	0.409486
chr2	240977905	240978759	chr2-240977905-DEL-855	chr2	240975001	241000000	0.208363	0.521312	0.167245	0	0	0.366228	0	0.562373	0.618109	0	0	0	0	0.589131	1.08718	0	0.639278	0	0	0	0	0.789049	0	0	0.465071	0.897498	0.29108	14	0.121434	0.121434
chr2	240979662	240980021	chr2-240979662-DEL-360	chr2	240975001	241000000	0.208363	0.521312	0.167245	0	0	0.366228	0	0.562373	0.618109	0	0	0	0	0.589131	1.08718	0	0.639278	0	0	0	0	0.789049	0	0	0.465071	0.897498	0.29108	14	0.683178	0.683178
chr2	240980135	240980764	chr2-240980135-DEL-630	chr2	240975001	241000000	0.208363	0.521312	0.167245	0	0	0.366228	0	0.562373	0.618109	0	0	0	0	0.589131	1.08718	0	0.639278	0	0	0	0	0.789049	0	0	0.465071	0.897498	0.29108	14	0.175903	0.175903
chr2	240985517	240985732	chr2-240985517-DEL-216	chr2	240975001	241000000	0.208363	0.521312	0.167245	0	0	0.366228	0	0.562373	0.618109	0	0	0	0	0.589131	1.08718	0	0.639278	0	0	0	0	0.789049	0	0	0.465071	0.897498	0.29108	14	0.441538	0.441538
chr2	241603295	241603494	chr2-241603295-DEL-200	chr2	241595001	241620000	0.444283	1.13784	0.91014	1.18933	1.1324	0.976694	0.795023	0	0.952486	0	0.719563	0.741254	0	0	0.824556	1.35279	1.25144	0.720925	0	0	0.717558	0.826147	0.807965	0.960341	0	0	0	9	0.791615	0.791615
chr2	241741528	241741629	chr2-241741528-DEL-102	chr2	241720001	241745000	0.290174	0.563819	0	0	0.424119	0	0	0	0	0	0	0	0.60896	0	0	0	0.30028	0	0	0	0.479463	0	0	0	0	0	0	21	0.101431	0.101431
chr2	241742919	241742998	chr2-241742919-DEL-80	chr2	241720001	241745000	0.290174	0.563819	0	0	0.424119	0	0	0	0	0	0	0	0.60896	0	0	0	0.30028	0	0	0	0.479463	0	0	0	0	0	0	21	0.33388	0.33388
chr2	241890938	241891003	chr2-241890938-DEL-66	chr2	241870001	241895000	1.23488	1.82929	2.33067	1.72298	1.71367	1.56842	2.10365	1.85072	1.72091	2.2705	2.02869	1.86293	1.36121	1.73859	2.01317	1.59958	2.08123	1.90517	1.89214	2.00448	1.42169	2.64712	1.28248	2.05783	2.20272	1.82193	1.87288	0	0.188246	0.188246
chr20	280212	280275	chr20-280212-DEL-64	chr20	260001	285000	0.584966	0	0.957122	0.485119	1.06005	0.691053	0.914706	1.16237	0.650888	0.499917	1.09778	0.703454	0.611582	0.727272	0.808991	1.23726	0.925028	0.681719	0.837528	0.692648	0.834079	0.740055	0.521961	0.574051	0.759187	0.991068	0.791743	1	0.571611	0.571611
chr20	1408500	1410170	chr20-1408500-DEL-1671	chr20	1385001	1410000	0.504951	0.415381	0.656075	0	0	0	0.372017	0	0	0	0	0	0	0	0	0	0.612144	0	0	0	0.0860423	0	0	0	0.439549	0	0	20	0.610845	0.610845
chr20	2534330	2534443	chr20-2534330-DEL-114	chr20	2515001	2540000	0.302994	0	0.402648	0.81155	0.755138	0.507888	0.89729	0	0.726853	0	0.68155	0.495309	0.515443	0.767323	0.508637	0.512621	0.607893	0.491216	0	0	0.70713	0	0.594074	0.722123	1.02718	0.991009	0	7	0.048647	0.048647
chr20	3041110	3041406	chr20-3041110-DEL-297	chr20	3030001	3055000	0.698851	1.13489	0	1.6417	1.68294	1.51197	1.17052	1.4101	1.82443	1.43652	1.5358	1.19919	1.1672	1.20927	0	0.889462	1.63294	1.69887	1.36953	1.54476	1.23188	2.05402	0.986195	1.82424	0	0	1.81855	4	0.526711	0.526711
chr20	4227653	4227704	chr20-4227653-DEL-52	chr20	4205001	4230000	0.53578	0.854332	1.06582	1.10734	0	1.17539	1.02266	0	1.18739	1.01753	1.11177	1.02867	0	0	1.31028	1.14638	1.23222	1.05244	0.83677	0	0.710045	0	1.08606	1.25812	1.1346	0	0.999535	7	1	1
chr20	6270522	6270596	chr20-6270522-DEL-75	chr20	6265001	6290000	0.192875	0.487046	0	0.371896	0.424153	0	0.367179	0	0	0	0	0	0.256854	0	0.44475	0.468587	0.124375	0	0	0	0.219548	0.464463	0.286959	0	0	0.485525	0	14	0.330176	0.330176
chr20	14072399	14072461	chr20-14072399-DEL-63	chr20	14065001	14090000	0.247695	0.410258	0.515035	0.457056	0.187018	0.472336	0.289237	0.470234	0.547646	0	0	0.363262	0.436941	0	0.480931	0.543887	0	0.846517	0.231367	0.47488	0.558092	0	0	0	0.515444	0.573823	0	8	0.461317	0.461317
chr20	17303496	17303547	chr20-17303496-DEL-52	chr20	17280001	17305000	0.192023	0	0	0.471775	0.277618	0	0	0	0.392905	0	0.246217	0.205994	0	0	0.153947	0.162103	0	0	0.175735	0.183454	0.442952	0.110445	0	0.583685	0.286554	0	0.211119	12	0.231155	0.231155
chr20	19678281	19678408	chr20-19678281-DEL-128	chr20	19670001	19695000	0.75927	1.24349	0.917996	1.38214	1.3416	1.24985	1.46045	1.10836	1.19831	0.980585	0.844253	1.18293	1.35136	1.25219	1.59086	0.915598	1.1726	1.61021	1.18915	1.1036	1.0348	1.35891	1.12299	1.76181	1.36119	1.12583	1.56277	0	0.138127	0.138127
chr20	22327808	22327859	chr20-22327808-DEL-52	chr20	22315001	22340000	0.461185	0.925208	0.641942	0.608432	0.80203	1.12292	0.917833	1.33217	0.834214	1.03018	0.738428	0.849657	0.668849	0.902011	0.93806	1.37018	1.25724	1.05027	1.21688	0.772944	2.10813	1.30385	1.12697	1.54179	0.993215	0.849286	1.00623	0	0.113856	0.113856
chr20	22674685	22675012	chr20-22674685-DEL-328	chr20	22675001	22700000	0.413151	0.550675	0.693698	0.844279	0.839716	0.731149	0.585033	1.00196	0	0.786354	0.63515	0.986853	0	0.88421	0.399368	1.0132	0.947426	0.891628	0.644642	0.667961	1.26377	1.41952	1.19019	1.12856	1.20817	0.565993	0.768196	2	0.551193	0.551193
chr20	23240441	23240496	chr20-23240441-DEL-56	chr20	23235001	23260000	0.205247	0	0.605158	0	0	0.196483	0.645496	0	0.281305	0.609714	0.382741	0.689665	0	0	0	0.593568	0.610782	0.485376	0.673594	0	0	0.88881	0.44212	0.816335	1.10208	0.226666	0.538353	9	0.734719	0.734719
chr20	24982235	24982291	chr20-24982235-DEL-57	chr20	24975001	25000000	0.975015	0	0	2.49599	0	2.24672	0	1.84009	0	0	0	2.39902	0	0	0	0	0	1.86444	0	2.33692	0	2.33914	0	0	1.97015	0	0	18	0.769231	0.769231
chr20	33093546	33093648	chr20-33093546-DEL-103	chr20	33075001	33100000	0.293045	0.623461	0.641218	0.429776	0.825093	0.462516	0.297536	0.315384	0.301762	0.720202	0.638452	0.454308	0.511179	0.551753	0	0	0.575387	0.631358	0.478123	0.629826	0.448996	0.734686	0.895834	0	0.646875	0.495841	0.671794	3	0.759662	0.759662
chr20	34528007	34528339	chr20-34528007-DEL-333	chr20	34520001	34545000	0.679176	1.32319	1.6005	1.22219	1.29505	1.4448	1.616	1.45623	1.23922	1.10115	1.38272	1.3303	1.50028	1.62994	1.72669	1.7261	1.28182	1.61156	0.95173	1.42595	1.29761	1.64847	1.53254	1.1924	1.16068	1.90044	1.42514	0	0.656457	0.656457
chr20	34817145	34817212	chr20-34817145-DEL-68	chr20	34810001	34835000	0.377405	1.30374	1.36008	0	1.4674	1.61941	0	1.14099	1.13119	0.99956	0	1.17877	0.886449	1.43868	1.32699	0	1.47949	1.56598	1.61042	1.16374	1.17253	1.95267	1.32804	1.20461	1.60305	1.45638	1.43865	4	0.148444	0.148444
chr20	35097534	35097583	chr20-35097534-DEL-50	chr20	35085001	35110000	0.565619	1.55536	0.878098	1.27784	0.994908	0.92762	1.4247	1.24481	1.10314	0.457402	0.96985	0.964521	0.996647	1.06709	0.544801	1.05856	0.722086	0.812928	1.09796	1.25875	1.25701	1.09254	1.01458	0.966806	1.13794	0	1.37028	1	0.441538	0.441538
chr20	35901906	35901959	chr20-35901906-DEL-54	chr20	35880001	35905000	0.225545	0	0	0	0	0	0	0	0	0	0	0	0	0.340229	0	0	0	0	0.630994	0	0	0.645619	0	0	0	0	0	23	0.882274	0.882274
chr20	35960724	35960783	chr20-35960724-DEL-60	chr20	35945001	35970000	0.857813	1.47498	1.16292	1.172	1.5205	1.53732	1.24273	1.26615	1.64512	1.60471	1.51831	1.41747	0.987357	0	1.26579	1.40922	1.47057	1.21819	1.24453	1.13638	1.30234	1.48981	1.36549	1.27655	1.41283	1.37591	1.72617	1	0.0472615	0.0472615
chr20	37187207	37187518	chr20-37187207-DEL-312	chr20	37165001	37190000	0.793801	0.966743	1.22092	1.35456	1.10578	1.40725	1.09303	1.83317	0.640294	1.10456	0.945358	1.04844	1.15778	1.21776	1.32655	0.82068	1.39366	0.744661	1.34071	1.13819	0.827633	1.29417	0.93037	1.38954	1.38326	0.929658	1.44404	0	0.846154	0.846154
chr20	38426468	38427167	chr20-38426468-DEL-700	chr20	38405001	38430000	0.392349	0.76822	0	0.49673	0.935756	0.752764	0.755829	0.773004	0.502792	0.628495	0.48047	0.786845	0.692991	0.921642	0.992305	0.844387	1.0339	1.07646	0.636585	0.726079	0.428653	0.924025	0.50256	1.33391	1.07928	0.606071	0.914632	1	0.651177	0.651177
chr20	38895906	38895959	chr20-38895906-DEL-54	chr20	38890001	38915000	0.876487	1.98406	1.81776	1.44847	2.22454	2.0982	1.79844	1.58035	1.71658	2.00654	1.95092	1.67851	1.84822	1.65236	2.06543	1.58169	1.46627	1.73607	1.88185	2.06886	2.05454	2.3811	1.64284	2.02318	2.01151	1.81887	1.76083	0	0.683217	0.683217
chr20	43852629	43855142	chr20-43852629-DEL-2514	chr20	43830001	43855000	0.50476	0.945555	0.67877	0.762354	0.656744	0.632736	1.10436	0.75034	0.963168	0.513155	0.671476	0.714422	0.699348	1.21641	1.01152	0.594397	0.615436	1.13663	0.831824	0.760063	0.735759	0.541674	0.791864	0.42181	0.981202	0.500131	0.569133	0	0.57274	0.57274
chr20	44677210	44680191	chr20-44677210-DEL-2982	chr20	44665001	44690000	0.528796	0	0.654284	0.918097	0.552174	0.784833	0.590448	0.671681	0	0.979699	0.696379	1.08168	0.761427	0.173281	0	0.52327	0	0	0.857587	0.40764	0.72367	0.985822	0.877995	0.526812	0.881839	0	0.98461	6	0.129418	0.129418
chr20	45773800	45773920	chr20-45773800-DEL-121	chr20	45765001	45790000	0.992681	1.90824	2.28167	2.02918	2.09069	2.08395	1.83044	2.74056	2.57885	1.97923	2.42979	2.2916	1.65022	2.05473	0	2.51657	1.75971	1.85096	1.81174	2.19822	2.25265	1.94254	1.77135	2.39631	2.00525	1.90628	2.34045	1	0.470635	0.470635
chr20	46420066	46420128	chr20-46420066-DEL-63	chr20	46405001	46430000	0.809875	1.63486	1.43025	1.25126	1.48124	1.0916	1.03772	0.90782	0.760652	1.18226	1.1614	1.46144	1.20012	0.981753	0	1.43925	1.60312	1.27437	1.04164	1.29954	1.19063	1.25439	1.39611	0.959336	1.23415	1.08196	1.49236	1	0.108558	0.108558
chr20	47390326	47390651	chr20-47390326-DEL-326	chr20	47375001	47400000	1.04063	1.83012	1.8155	2.18182	1.84893	1.92265	1.98199	1.81431	2.35909	1.81304	2.05527	2.14289	1.98262	2.25128	2.63175	1.45035	1.89739	2.29769	1.86177	2.03657	2.0431	2.66343	1.94965	2.74666	2.12242	2.05061	2.21696	0	0.539953	0.539953
chr20	49834353	49834433	chr20-49834353-DEL-81	chr20	49820001	49845000	0.333081	0	0.996815	0	0.953678	0	0	0.948696	0.906569	0.867392	0.859386	0.61752	1.17895	0.486303	0.772685	0.784231	0	0.817474	0.685943	0.649735	0	0.698666	0.511103	0.759403	0	0.527278	0	8	0.470635	0.470635
chr20	49927199	49927278	chr20-49927199-DEL-80	chr20	49925001	49950000	0.371192	1.43783	1.8189	1.83566	0	1.68653	1.53814	1.55214	0	1.7282	1.63414	1.55601	0	1.63727	1.91773	2.02267	1.86822	1.73556	1.20979	1.66308	1.32485	0	0	0	0	1.60989	0	8	0.428549	0.428549
chr20	50197997	50198144	chr20-50197997-DEL-148	chr20	50175001	50200000	1.35781	2.364	2.41645	2.00088	2.13192	2.59886	2.15747	1.8666	2.6547	2.28605	2.42175	2.46108	3.18213	2.36806	2.50417	2.23029	2.56674	2.39983	2.39144	2.69758	2.05375	2.59264	1.94487	2.08602	2.61098	2.82936	3.15343	0	0.656457	0.656457
chr20	53228574	53228630	chr20-53228574-DEL-57	chr20	53210001	53235000	0.277109	0	0.526776	0.491767	0.468552	0.441013	0.372622	0	0.313006	0.533211	0.36499	0.468657	0.422204	0.550614	0.542904	0.570924	1.51663	0.661939	0.481734	0.408758	0.585432	0.885707	0.489103	0.658208	0.617868	0.417182	0.65095	2	0.551193	0.551193
chr20	53841426	53841598	chr20-53841426-DEL-173	chr20	53825001	53850000	0.583733	0.930755	0.631971	1.10532	0.43742	0.579865	0.61178	1.02347	1.00593	0.543946	0.498362	0.588337	0.7314	0.923581	1.23792	1.16235	0.737528	0.909281	0.464511	0.641734	0.899626	0.560304	0.714116	0.538308	0	0.574753	1.11078	1	0.886154	0.886154
chr20	54676113	54676426	chr20-54676113-DEL-314	chr20	54660001	54685000	0.41718	0.643928	0.9604	0.86837	0.837176	1.24177	0.77984	1.13277	0.807944	1.02378	0.701022	0.965222	0.696032	0.640505	1.07049	0.932482	0	0.895585	0.845402	0.854057	1.21384	0.999859	0	0.968158	0.703663	0.839608	0.897476	2	0.210769	0.210769
chr20	57598461	57598510	chr20-57598461-DEL-50	chr20	57580001	57605000	0.987158	2.01933	1.83832	1.61254	1.9043	1.974	1.45467	1.70464	2.22974	2.02598	1.82166	1.5941	1.51118	2.05896	2.08632	1.79635	1.3866	1.79549	1.84205	2.06459	1.5034	1.76759	1.97153	1.5047	1.86306	1.70731	2.32935	0	0.832626	0.832626
chr20	57660509	57660763	chr20-57660509-DEL-255	chr20	57645001	57670000	0.234318	0	0	0	0	0	0.314653	0	0	0.51591	0	0	0	0	0	0	0.438803	0	0	0	0	0	0	0.414993	0	0	0	22	0.494193	0.494193
chr20	58643931	58643982	chr20-58643931-DEL-52	chr20	58625001	58650000	0.653486	1.50327	0.971577	1.41764	0.972424	1.03374	1.28361	0.999849	0.952553	0.959819	0.890537	0.972228	0.603899	1.34817	1.0597	0.93429	1.10031	0.793724	0.713351	1.08155	1.06736	1.24371	1.00625	0.926453	0.901654	0.88545	1.41439	0	0.0469879	0.0469879
chr20	61970872	61970933	chr20-61970872-DEL-62	chr20	61955001	61980000	0.336054	0.97502	0.462797	1.19287	0	1.0403	0.743804	0.411056	0	0.725655	1.27774	1.23341	0.752236	1.2661	1.59825	1.25383	0	0.89225	0.89491	1.02972	0.848498	0.886997	0.997341	0.926067	0.555239	0.948709	1.32535	3	0.51694	0.51694
chr20	62417506	62417558	chr20-62417506-DEL-53	chr20	62395001	62420000	0.876928	1.78138	1.82748	2.27754	1.65148	1.6277	1.56668	1.66903	1.91946	1.68408	1.51373	1.81561	1.40864	2.03704	0	2.05378	2.33934	1.72887	1.46362	1.52188	1.45601	2.74726	1.31331	1.76152	1.82983	1.80783	1.53353	1	0.96	0.96
chr20	62417854	62417906	chr20-62417854-DEL-53	chr20	62395001	62420000	0.876928	1.78138	1.82748	2.27754	1.65148	1.6277	1.56668	1.66903	1.91946	1.68408	1.51373	1.81561	1.40864	2.03704	0	2.05378	2.33934	1.72887	1.46362	1.52188	1.45601	2.74726	1.31331	1.76152	1.82983	1.80783	1.53353	1	0.923077	0.923077
chr20	62498752	62498831	chr20-62498752-DEL-80	chr20	62490001	62515000	0.294711	0	0.225962	0	0	0.450677	0.0578385	0.905782	0	0	0	0.396051	0	0.486692	0.903721	0	0.603222	0	0.37949	0	0	1.25809	0	0	0.756195	0.619882	0	14	0.108919	0.108919
chr20	62655310	62655365	chr20-62655310-DEL-56	chr20	62645001	62670000	0.288255	0	0	0.479109	0	0	0.657633	0	0	0	0	0.619913	0	0.739266	0	0	1.37448	0	0.867263	0.41526	0	0	1.06528	0.550473	0	0	0.820859	16	1	1
chr20	62954026	62954078	chr20-62954026-DEL-53	chr20	62945001	62970000	0.398696	0.331298	0.553881	0.515956	0.832484	0.500902	0	0.488561	0.865207	0.827554	0.701167	0.450596	0	0.26669	0	0.679248	0.616095	0.461172	0.397703	0.414828	0.708623	0.749641	0.81768	0	0.930934	0.961585	0.663349	4	0.53356	0.53356
chr20	62960991	62961070	chr20-62960991-DEL-80	chr20	62945001	62970000	0.398696	0.331298	0.553881	0.515956	0.832484	0.500902	0	0.488561	0.865207	0.827554	0.701167	0.450596	0	0.26669	0	0.679248	0.616095	0.461172	0.397703	0.414828	0.708623	0.749641	0.81768	0	0.930934	0.961585	0.663349	4	0.130167	0.130167
chr20	62966031	62966085	chr20-62966031-DEL-55	chr20	62945001	62970000	0.398696	0.331298	0.553881	0.515956	0.832484	0.500902	0	0.488561	0.865207	0.827554	0.701167	0.450596	0	0.26669	0	0.679248	0.616095	0.461172	0.397703	0.414828	0.708623	0.749641	0.81768	0	0.930934	0.961585	0.663349	4	0.89189	0.89189
chr20	62966086	62966250	chr20-62966086-DEL-165	chr20	62945001	62970000	0.398696	0.331298	0.553881	0.515956	0.832484	0.500902	0	0.488561	0.865207	0.827554	0.701167	0.450596	0	0.26669	0	0.679248	0.616095	0.461172	0.397703	0.414828	0.708623	0.749641	0.81768	0	0.930934	0.961585	0.663349	4	0.335834	0.335834
chr20	63045226	63045304	chr20-63045226-DEL-79	chr20	63040001	63065000	0.350003	0.493985	0.955435	0.754179	0.581566	1.23619	0.946607	0.579217	0.612422	1.38429	1.00913	0.567581	0.980102	1.18868	1.36151	0.615307	1.12404	0.978449	0.881457	1.08338	1.03003	0.796625	0.631274	0	1.06276	0.812445	0.835812	1	0.0908473	0.0908473
chr20	63304191	63304270	chr20-63304191-DEL-80	chr20	63295001	63320000	0.414431	0.742673	0.52998	0	0.88842	0.57437	0.847871	1.03391	0.691588	0.912341	0.904421	0.828529	0.294618	1.13494	1.05555	0.858414	0.814045	0.831799	0	0.750567	0	1.28118	0.679329	0.863705	0	1.80535	0	5	0.798805	0.798805
chr20	63314806	63314857	chr20-63314806-DEL-52	chr20	63295001	63320000	0.414431	0.742673	0.52998	0	0.88842	0.57437	0.847871	1.03391	0.691588	0.912341	0.904421	0.828529	0.294618	1.13494	1.05555	0.858414	0.814045	0.831799	0	0.750567	0	1.28118	0.679329	0.863705	0	1.80535	0	5	0.656457	0.656457
chr20	63392631	63392694	chr20-63392631-DEL-64	chr20	63390001	63415000	0.271945	0	0.776175	0	0	0	0	0	0.614119	0	0	0	0.52595	0.446868	0	0	0	0	0	0	0.586783	0	0	0.855159	0	0	0.39935	19	0.736605	0.736605
chr20	63402001	63402059	chr20-63402001-DEL-59	chr20	63390001	63415000	0.271945	0	0.776175	0	0	0	0	0	0.614119	0	0	0	0.52595	0.446868	0	0	0	0	0	0	0.586783	0	0	0.855159	0	0	0.39935	19	0.527029	0.527029
chr20	63535751	63535820	chr20-63535751-DEL-70	chr20	63515001	63540000	0.523879	1.50829	1.35938	1.28634	1.39996	1.33397	1.67269	1.13235	1.48292	1.50959	1.17331	1.12	1.12637	0.926217	1.11233	0	1.40971	1.26931	1.3603	1.23971	1.12276	1.76245	1.25456	1.2299	1.77892	0.934365	0.894113	1	0.366646	0.366646
chr20	63669645	63669815	chr20-63669645-DEL-171	chr20	63645001	63670000	0.346354	0.587688	0	0	0	0.822842	0	0.853555	0	0	0	0	0	1.26353	1.10737	0	0	0	1.02695	0	1.69375	0	0	0	0	0	0	19	0.461317	0.461317
chr20	63669645	63670043	chr20-63669645-DEL-399	chr20	63645001	63670000	0.346354	0.587688	0	0	0	0.822842	0	0.853555	0	0	0	0	0	1.26353	1.10737	0	0	0	1.02695	0	1.69375	0	0	0	0	0	0	19	1	1
chr20	63747316	63747510	chr20-63747316-DEL-195	chr20	63735001	63760000	0.230258	0.554877	0	0	0.656292	0.271039	0	0	0	0.710384	0.481613	0	0	0	0.483636	0.500195	0.590512	0.757218	0	0	0	0	0	0	0	0	0	17	0.45703	0.45703
chr20	63960307	63960687	chr20-63960307-DEL-381	chr20	63960001	63985000	1.04871	2.01354	1.56069	1.45235	1.67014	1.39786	1.4477	1.62909	1.34044	1.77974	1.26092	1.00969	1.54973	1.65661	1.85546	1.37275	1.76912	1.50236	1.69209	1.6247	1.3179	1.78975	1.9356	1.60359	2.04835	1.31669	1.85333	0	0.97831	0.97831
chr20	63964837	63966113	chr20-63964837-DEL-1277	chr20	63960001	63985000	1.04871	2.01354	1.56069	1.45235	1.67014	1.39786	1.4477	1.62909	1.34044	1.77974	1.26092	1.00969	1.54973	1.65661	1.85546	1.37275	1.76912	1.50236	1.69209	1.6247	1.3179	1.78975	1.9356	1.60359	2.04835	1.31669	1.85333	0	0.352308	0.352308
chr20	63965068	63965153	chr20-63965068-DEL-86	chr20	63960001	63985000	1.04871	2.01354	1.56069	1.45235	1.67014	1.39786	1.4477	1.62909	1.34044	1.77974	1.26092	1.00969	1.54973	1.65661	1.85546	1.37275	1.76912	1.50236	1.69209	1.6247	1.3179	1.78975	1.9356	1.60359	2.04835	1.31669	1.85333	0	0.15974	0.15974
chr20	64125393	64126222	chr20-64125393-DEL-830	chr20	64125001	64150000	0.447658	0	0.318877	0.616842	0.754768	0.750488	0.659291	1.04974	0.793785	1.0737	0.358522	0.319998	0.797013	1.10654	1.20268	2.10498	0.840841	0.33756	0.282759	0.795957	0.476944	1.03975	0.835548	1.24233	0.463923	0.443849	0.354522	1	1	1
chr20	64126766	64126841	chr20-64126766-DEL-76	chr20	64125001	64150000	0.447658	0	0.318877	0.616842	0.754768	0.750488	0.659291	1.04974	0.793785	1.0737	0.358522	0.319998	0.797013	1.10654	1.20268	2.10498	0.840841	0.33756	0.282759	0.795957	0.476944	1.03975	0.835548	1.24233	0.463923	0.443849	0.354522	1	0.812308	0.812308
chr20	64131847	64131914	chr20-64131847-DEL-68	chr20	64125001	64150000	0.447658	0	0.318877	0.616842	0.754768	0.750488	0.659291	1.04974	0.793785	1.0737	0.358522	0.319998	0.797013	1.10654	1.20268	2.10498	0.840841	0.33756	0.282759	0.795957	0.476944	1.03975	0.835548	1.24233	0.463923	0.443849	0.354522	1	0.181451	0.181451
chr20	64132186	64132252	chr20-64132186-DEL-67	chr20	64125001	64150000	0.447658	0	0.318877	0.616842	0.754768	0.750488	0.659291	1.04974	0.793785	1.0737	0.358522	0.319998	0.797013	1.10654	1.20268	2.10498	0.840841	0.33756	0.282759	0.795957	0.476944	1.03975	0.835548	1.24233	0.463923	0.443849	0.354522	1	0.219926	0.219926
chr20	64136448	64136501	chr20-64136448-DEL-54	chr20	64125001	64150000	0.447658	0	0.318877	0.616842	0.754768	0.750488	0.659291	1.04974	0.793785	1.0737	0.358522	0.319998	0.797013	1.10654	1.20268	2.10498	0.840841	0.33756	0.282759	0.795957	0.476944	1.03975	0.835548	1.24233	0.463923	0.443849	0.354522	1	0.569474	0.569474
chr20	64220782	64220862	chr20-64220782-DEL-81	chr20	64210001	64235000	0.810105	0	0	0	0	0	0	0	0	0	0.183941	0	0	0	0	0	0	0	0	0	0	0.847398	0	0	1.63959	0	0	23	0.82009	0.82009
chr21	16359642	16359780	chr21-16359642-DEL-139	chr21	16340001	16365000	0.237151	0.436524	0.358304	0.768571	0.442381	0.405743	0.466059	0.601899	0	0.702127	0.344602	0.361896	0.283691	0.660945	0.398714	0.646327	0.472697	0.548574	0.195548	0	0.574124	0.702812	0.157954	0	0.83418	0.270494	0.424444	3	0.94	0.94
chr21	17069141	17069196	chr21-17069141-DEL-56	chr21	17055001	17080000	0.185105	0	0	0	0	0.143225	0.27608	0	0.0452386	0	0.267186	0.137472	0	0	0	0.715551	0.223383	0.34248	0	0.198874	0	0.347105	0	0	0.262081	0	0.326051	14	1	1
chr21	29179904	29180257	chr21-29179904-DEL-354	chr21	29160001	29185000	0.295593	0.551715	0.187808	0.411657	0.293941	0.24581	0.293509	0.444808	0.427883	0.527606	0.554538	0.682205	0.294586	0.270959	0	0.49762	0	0.471807	0	0.462325	0.342354	0.393817	0.318002	0.377834	0.31014	0.458438	0.703877	3	0.0949051	0.0949051
chr21	29229496	29229835	chr21-29229496-DEL-340	chr21	29220001	29245000	0.423143	0	0	0	0	0	0	0	0.155672	0	0	0	0	0	0	0	0	0	0.253352	0	0	0.177377	0.262085	0.401691	0	0	0	21	0.846154	0.846154
chr21	33322041	33322106	chr21-33322041-DEL-66	chr21	33315001	33340000	0.378089	0	0	0.778685	0.633296	0.644447	0	0.821212	0	0	0	0.545779	0.538358	0	0	0	0.643117	0.399377	0.649472	0	0	0.645594	0.650944	0	0.719007	0.77952	0.640632	12	0.544604	0.544604
chr21	34700230	34701084	chr21-34700230-DEL-855	chr21	34685001	34710000	0.289096	0	0.445782	0.635433	0	0	0	0.539707	0.521169	0.564404	0	0	0	0.65702	0	0.503743	1.17684	0	0.743953	0	0	1.12125	0	0.535245	0	0	0.878436	14	1	1
chr21	36144485	36144655	chr21-36144485-DEL-171	chr21	36120001	36145000	0.997543	1.95606	1.78203	1.59482	1.84326	2.06194	1.8057	1.94337	1.95759	2.10319	2.11797	1.89169	1.92115	1.60933	1.25999	2.0591	1.71412	2.21626	2.00559	2.10736	2.07156	3.16417	1.65543	1.4477	2.20115	1.88722	2.50231	0	0.96	0.96
chr21	36492139	36492460	chr21-36492139-DEL-322	chr21	36480001	36505000	0.785993	1.10706	0.975424	0.845927	1.12106	0.852047	0.43552	0.80076	1.00331	0.803344	0.838368	1.13372	0.756975	0.857615	0.774687	0.928636	1.34539	0.899612	1.05189	0.65302	1.07087	1.09569	1.02362	0.800481	0.855341	0.595383	0.640933	0	0.287174	0.287174
chr21	36496720	36496827	chr21-36496720-DEL-108	chr21	36480001	36505000	0.785993	1.10706	0.975424	0.845927	1.12106	0.852047	0.43552	0.80076	1.00331	0.803344	0.838368	1.13372	0.756975	0.857615	0.774687	0.928636	1.34539	0.899612	1.05189	0.65302	1.07087	1.09569	1.02362	0.800481	0.855341	0.595383	0.640933	0	0.88	0.88
chr21	41474315	41474394	chr21-41474315-DEL-80	chr21	41450001	41475000	0.620445	1.44167	1.18874	1.67419	1.43491	1.43885	1.55523	1.09432	1.25394	1.62671	1.26513	1.48141	1.41785	1.30447	1.61897	1.40498	2.07673	1.13478	1.18084	1.27653	1.15428	1.28023	1.36986	1.64044	1.64509	1.28674	1.13199	0	0.622736	0.622736
chr21	41474595	41474648	chr21-41474595-DEL-54	chr21	41450001	41475000	0.620445	1.44167	1.18874	1.67419	1.43491	1.43885	1.55523	1.09432	1.25394	1.62671	1.26513	1.48141	1.41785	1.30447	1.61897	1.40498	2.07673	1.13478	1.18084	1.27653	1.15428	1.28023	1.36986	1.64044	1.64509	1.28674	1.13199	0	0.683217	0.683217
chr21	41474831	41474913	chr21-41474831-DEL-83	chr21	41450001	41475000	0.620445	1.44167	1.18874	1.67419	1.43491	1.43885	1.55523	1.09432	1.25394	1.62671	1.26513	1.48141	1.41785	1.30447	1.61897	1.40498	2.07673	1.13478	1.18084	1.27653	1.15428	1.28023	1.36986	1.64044	1.64509	1.28674	1.13199	0	0.78101	0.78101
chr21	41474867	41475083	chr21-41474867-DEL-217	chr21	41450001	41475000	0.620445	1.44167	1.18874	1.67419	1.43491	1.43885	1.55523	1.09432	1.25394	1.62671	1.26513	1.48141	1.41785	1.30447	1.61897	1.40498	2.07673	1.13478	1.18084	1.27653	1.15428	1.28023	1.36986	1.64044	1.64509	1.28674	1.13199	0	0.135315	0.135315
chr21	41604390	41604442	chr21-41604390-DEL-53	chr21	41590001	41615000	0.225351	0.54569	0	0.37815	0.648889	0.274564	0.267412	0.620452	0.432548	0	0.354337	0.616827	0	0	0.676387	0.242807	0.715426	0.516395	0.337778	0.27534	0.291864	0.850028	0.536205	0.802383	0.724142	0.264843	0.502392	4	1	1
chr21	41806071	41806371	chr21-41806071-DEL-301	chr21	41795001	41820000	0.619184	1.54414	1.20797	1.54684	2.09988	1.42661	1.18858	0.927147	1.37046	0.785736	1.55857	1.36899	1.22129	1.17715	1.92194	1.83735	1.49196	1.20327	1.24923	1.27271	1.39976	1.5113	1.60034	1.17165	1.09891	1.32066	1.30424	0	0.923077	0.923077
chr21	41806135	41806267	chr21-41806135-DEL-133	chr21	41795001	41820000	0.619184	1.54414	1.20797	1.54684	2.09988	1.42661	1.18858	0.927147	1.37046	0.785736	1.55857	1.36899	1.22129	1.17715	1.92194	1.83735	1.49196	1.20327	1.24923	1.27271	1.39976	1.5113	1.60034	1.17165	1.09891	1.32066	1.30424	0	0.78101	0.78101
chr21	41814066	41814300	chr21-41814066-DEL-235	chr21	41795001	41820000	0.619184	1.54414	1.20797	1.54684	2.09988	1.42661	1.18858	0.927147	1.37046	0.785736	1.55857	1.36899	1.22129	1.17715	1.92194	1.83735	1.49196	1.20327	1.24923	1.27271	1.39976	1.5113	1.60034	1.17165	1.09891	1.32066	1.30424	0	0.384615	0.384615
chr21	42137641	42137722	chr21-42137641-DEL-82	chr21	42115001	42140000	0.972284	2.27034	2.18936	2.58698	2.05355	2.23908	2.26382	1.88457	2.40271	2.24985	1.99105	2.21801	2.13065	2.51324	2.13434	2.31648	1.75698	2.38053	2.14513	2.17878	1.91251	2.17234	2.04318	2.47382	1.99891	2.49556	2.14007	0	0.821365	0.821365
chr21	42283666	42283728	chr21-42283666-DEL-63	chr21	42275001	42300000	0.635217	1.38871	1.00382	1.68004	0	1.09596	1.31889	0.832323	1.14103	1.50987	1.05957	1.18238	0.968752	0	1.2093	1.34496	1.62084	0.959451	1.7218	1.26726	1.19788	1.35686	1.02675	1.1384	0	1.2314	1.27039	3	0.149647	0.149647
chr21	42283724	42283904	chr21-42283724-DEL-181	chr21	42275001	42300000	0.635217	1.38871	1.00382	1.68004	0	1.09596	1.31889	0.832323	1.14103	1.50987	1.05957	1.18238	0.968752	0	1.2093	1.34496	1.62084	0.959451	1.7218	1.26726	1.19788	1.35686	1.02675	1.1384	0	1.2314	1.27039	3	0.918261	0.918261
chr21	42283740	42284164	chr21-42283740-DEL-425	chr21	42275001	42300000	0.635217	1.38871	1.00382	1.68004	0	1.09596	1.31889	0.832323	1.14103	1.50987	1.05957	1.18238	0.968752	0	1.2093	1.34496	1.62084	0.959451	1.7218	1.26726	1.19788	1.35686	1.02675	1.1384	0	1.2314	1.27039	3	0.651177	0.651177
chr21	42570077	42570127	chr21-42570077-DEL-51	chr21	42550001	42575000	0.836053	2.50457	1.21431	1.5536	1.52988	1.36798	1.36567	1.43868	1.40362	1.26299	2.52122	1.57549	1.53306	1.62773	1.21942	0	1.23398	1.52338	1.59522	1.41304	1.04675	1.60162	1.60953	2.01219	1.44306	1.34598	1.57585	1	0.198164	0.198164
chr21	42570265	42570315	chr21-42570265-DEL-51	chr21	42550001	42575000	0.836053	2.50457	1.21431	1.5536	1.52988	1.36798	1.36567	1.43868	1.40362	1.26299	2.52122	1.57549	1.53306	1.62773	1.21942	0	1.23398	1.52338	1.59522	1.41304	1.04675	1.60162	1.60953	2.01219	1.44306	1.34598	1.57585	1	0.111973	0.111973
chr21	42670361	42670420	chr21-42670361-DEL-60	chr21	42655001	42680000	0.195778	0	0	0	0	0	0	0	0	0	0	0	0.181433	0.441259	0	0	0	0	0	0	0	0	0	0	0.105606	0	0	23	1	1
chr21	43787217	43787314	chr21-43787217-DEL-98	chr21	43785001	43810000	1.08884	2.07905	1.56611	1.166	1.51714	1.54492	1.32836	1.45934	1.47422	1.47533	1.6537	1.71909	1.18217	1.5062	1.52629	1.51276	0.934732	1.46736	1.31391	1.37469	1.2761	1.78411	1.87192	1.11536	1.60258	1.12649	1.98571	0	0.312319	0.312319
chr21	44335932	44335983	chr21-44335932-DEL-52	chr21	44330001	44355000	0.720905	0	0	0	1.02082	0	0.116808	0.732594	0	1.1338	0.802243	1.93412	1.35985	0	1.00005	0.459195	0	1.2898	0	1.03587	0	1.76901	1.30996	0	0	0	1.63539	12	0.305054	0.305054
chr21	44502911	44503001	chr21-44502911-DEL-91	chr21	44495001	44520000	0.38209	0.676677	0.901228	0	0.529158	1.08629	0.595865	0.642799	1.08502	0.846337	0	0.770527	0.852594	0.727588	0.64472	0.741441	0.948493	1.04395	1.01979	0.678246	0.588139	1.06676	0.459946	0.998048	0.832853	0.876867	0	3	0.560362	0.560362
chr21	44951879	44952195	chr21-44951879-DEL-317	chr21	44940001	44965000	1.09791	2.19826	2.10712	2.11987	1.99451	2.13348	1.41255	1.63621	1.91592	1.99776	2.01235	1.95328	2.32929	1.44432	1.91663	1.99475	1.92591	1.73215	1.79771	1.64573	2.22386	2.19991	1.8024	2.15523	1.96804	1.62448	2.39032	0	0.409486	0.409486
chr21	45146051	45146129	chr21-45146051-DEL-79	chr21	45135001	45160000	1.07177	1.69257	2.16731	1.72538	1.48014	1.708	0.67697	1.92507	1.64282	1.40708	1.03167	1.61977	1.3636	1.66706	1.63156	2.08496	1.92164	2.21707	1.63474	1.35934	0.881297	2.24285	1.55682	1.44986	1.72545	2.0435	1.6917	0	0.89189	0.89189
chr21	45542111	45542171	chr21-45542111-DEL-61	chr21	45535001	45560000	0.532524	0	0.64428	0.29678	0.993683	0.775043	0	1.07878	0.429748	0	0	1.05165	0.522427	0.854413	0	0	0	0.786804	0	0	0.831325	0	0.587026	0	0.3967	0.533781	1.33594	11	0.130844	0.130844
chr21	45553677	45554141	chr21-45553677-DEL-465	chr21	45535001	45560000	0.532524	0	0.64428	0.29678	0.993683	0.775043	0	1.07878	0.429748	0	0	1.05165	0.522427	0.854413	0	0	0	0.786804	0	0	0.831325	0	0.587026	0	0.3967	0.533781	1.33594	11	0.656054	0.656054
chr21	45637535	45637646	chr21-45637535-DEL-112	chr21	45635001	45660000	0.44094	0.535116	0.707392	0.249954	0	0.429325	0	0.828104	0.425814	0	0	0.438208	0	0	0.675838	0.967925	0.617195	1.09363	0	0.50227	0.587862	0	0.680883	0	0	0	1.03302	11	0.57274	0.57274
chr21	45637535	45637590	chr21-45637535-DEL-56	chr21	45635001	45660000	0.44094	0.535116	0.707392	0.249954	0	0.429325	0	0.828104	0.425814	0	0	0.438208	0	0	0.675838	0.967925	0.617195	1.09363	0	0.50227	0.587862	0	0.680883	0	0	0	1.03302	11	0.759662	0.759662
chr21	45814443	45814492	chr21-45814443-DEL-50	chr21	45805001	45830000	0.262451	0.629741	0.836484	0	0.987165	0.713051	0.606774	0	0.912011	0.249194	0.506886	0	0.704448	0.748893	0	0	0	0.86628	0.714302	0.452482	0.282839	0.904088	0.604817	1.01117	0.573484	0	1.08579	7	0.812308	0.812308
chr21	45815618	45815717	chr21-45815618-DEL-100	chr21	45805001	45830000	0.262451	0.629741	0.836484	0	0.987165	0.713051	0.606774	0	0.912011	0.249194	0.506886	0	0.704448	0.748893	0	0	0	0.86628	0.714302	0.452482	0.282839	0.904088	0.604817	1.01117	0.573484	0	1.08579	7	0.367011	0.367011
chr21	45815858	45816083	chr21-45815858-DEL-226	chr21	45805001	45830000	0.262451	0.629741	0.836484	0	0.987165	0.713051	0.606774	0	0.912011	0.249194	0.506886	0	0.704448	0.748893	0	0	0	0.86628	0.714302	0.452482	0.282839	0.904088	0.604817	1.01117	0.573484	0	1.08579	7	0.367011	0.367011
chr21	46135335	46135453	chr21-46135335-DEL-119	chr21	46125001	46150000	0.61307	1.06411	1.37222	0.269447	1.32219	1.06696	1.1342	0.446564	0.62857	1.6247	0.93378	1.25305	1.56629	1.02787	0.84053	2.04423	1.50908	0.575823	1.15104	1.1413	0.760587	1.3869	1.07308	0.872522	0.813378	0.974142	1.01709	0	0.479323	0.479323
chr22	16277970	16278481	chr22-16277970-DEL-512	chr22	16275001	16300000	1.81539	3.90256	1.91708	3.28946	2.50834	2.29772	2.77963	1.51303	2.03978	2.60224	1.94606	1.60488	3.11336	2.64336	2.35915	2.5331	2.55756	2.39696	3.12971	1.90029	1.87226	1.67756	1.5763	3.53285	2.54198	2.49412	2.30959	0	0.539953	0.539953
chr22	17173799	17173861	chr22-17173799-DEL-63	chr22	17155001	17180000	0.668579	1.63732	1.38278	0	1.62283	0	1.49711	1.1105	0	0	1.2254	1.42807	1.3317	1.60544	1.30809	0	1.53222	1.35418	1.77433	0	1.04477	1.64854	1.31522	1.93232	1.12797	1.58466	1.74556	6	0.723619	0.723619
chr22	19727619	19727702	chr22-19727619-DEL-84	chr22	19710001	19735000	0.473839	0.624671	0.397626	1.25587	0	0.918253	0.612257	0.533272	0.667355	0.889751	1.26646	0.37669	1.16668	0.996755	1.58456	0	0.805003	0	0.678875	0.761027	0.970942	1.22644	0.56331	0.482349	0.567136	1.30219	0.738382	3	0.744473	0.744473
chr22	19959772	19959838	chr22-19959772-DEL-67	chr22	19935001	19960000	0.768875	1.34802	1.62587	1.67095	1.52504	1.67519	1.05935	1.60317	1.44521	1.39544	1.309	1.57111	1.81023	1.28498	1.3252	1.7019	1.49025	1.56268	1.57569	1.27849	2.03367	1.28252	1.67316	1.72712	1.25372	1.41231	2.41211	0	0.428549	0.428549
chr22	22580279	22586216	chr22-22580279-DEL-5938	chr22	22575001	22600000	0.626906	0.710418	0.833802	0	1.28093	0.751472	0.587144	0.805453	0	0.622295	1.40679	1.06096	0	0.821492	0	0.639153	1.61491	1.2212	1.15839	1.13671	1.11843	1.19864	1.07813	0.744145	1.45883	1.10745	0.84977	4	0.39464	0.39464
chr22	22655112	22655604	chr22-22655112-DEL-493	chr22	22645001	22670000	0.190214	0	0	0	0	0	0.425257	0	1.33635	0	0	0	0	0	0	0.519965	0.892388	0.910722	0	0.4966	0	0.785083	0	0	0	1.02925	0	18	0.231155	0.231155
chr22	22698403	22904994	chr22-22698403-DEL-206592	chr22	22755001	22780000	0.607003	1.57509	1.52607	1.63058	1.34048	1.11622	0.639452	0.913703	0.973632	0.970834	1.11635	1.36545	1.20809	1.29629	0	1.4893	1.21564	1.58427	1.42201	1.28297	1.42075	1.31383	0	2.10172	1.62472	1.07163	1.73911	2	0.39464	0.777714
chr22	22698403	22904994	chr22-22698403-DEL-206592	chr22	22850001	22875000	0.608494	1.15204	0.59785	0	0.808866	0.812665	0.846095	1.57752	0.613648	0.688403	1.13401	1.03391	0	1.08565	0	1.3144	1.07961	1.12707	0.886406	0.905399	1.07283	1.8103	0	1.10148	0.919703	0.867833	0.954413	4	0.610845	0.777714
chr22	22698403	22904994	chr22-22698403-DEL-206592	chr22	22870001	22895000	0.608494	0	0.59785	0	0	0.812665	0	1.57752	0	0.688403	0	1.03391	2.07463	1.08565	2.09845	0	1.07961	0	0.886406	0	0	1.8103	2.07551	0	0	0.867833	0.954413	12	0.777714	0.777714
chr22	22761487	22761576	chr22-22761487-DEL-90	chr22	22755001	22780000	0.607003	1.57509	1.52607	1.63058	1.34048	1.11622	0.639452	0.913703	0.973632	0.970834	1.11635	1.36545	1.20809	1.29629	0	1.4893	1.21564	1.58427	1.42201	1.28297	1.42075	1.31383	0	2.10172	1.62472	1.07163	1.73911	2	0.744615	0.744615
chr22	23130060	23130111	chr22-23130060-DEL-52	chr22	23125001	23150000	0.50185	1.69667	0	1.42719	0	1.44383	1.58732	0	1.52823	1.20501	1.54527	1.73946	1.6348	1.53975	1.21649	1.80288	0	1.89086	1.68136	1.4877	0.775506	1.89014	1.42886	1.47764	1.59466	0	1.67556	5	0.656457	0.656457
chr22	23136242	23137372	chr22-23136242-DEL-1131	chr22	23125001	23150000	0.50185	1.69667	0	1.42719	0	1.44383	1.58732	0	1.52823	1.20501	1.54527	1.73946	1.6348	1.53975	1.21649	1.80288	0	1.89086	1.68136	1.4877	0.775506	1.89014	1.42886	1.47764	1.59466	0	1.67556	5	0.395807	0.395807
chr22	23502790	23502878	chr22-23502790-DEL-89	chr22	23500001	23525000	0.603707	0.979334	1.14679	0.922556	1.0697	1.27606	0.887599	1.18712	0.961389	0.638792	0.889552	1.09078	0.755376	0	1.05515	0.917959	0.713257	0.572667	0.798789	0.939494	0.717219	1.14542	0.566583	1.25571	1.16613	0.539887	1.42648	1	0.75786	0.75786
chr22	23853747	23856318	chr22-23853747-DEL-2572	chr22	23845001	23870000	1.11974	1.90384	0	2.27025	2.22868	3.27967	2.51305	3.55328	1.7237	1.90197	2.29345	2.43232	1.77555	2.18959	2.24611	1.60834	1.70764	1.55949	1.3839	1.87662	1.01452	2.31052	2.56354	2.63302	2.06894	3.33891	2.1526	1	0.446944	0.446944
chr22	25054081	25056685	chr22-25054081-DEL-2605	chr22	25045001	25070000	0.684313	1.99631	1.67279	1.55201	1.38827	1.86531	1.49705	1.20453	1.30981	1.39734	1.28695	1.44273	1.68925	1.6574	0.946315	1.54316	1.25328	1.42206	1.40117	1.68469	1.84469	1.52142	1.22412	2.4646	1.0982	1.4066	1.69741	0	0.929395	0.929395
chr22	25348999	25349052	chr22-25348999-DEL-54	chr22	25330001	25355000	0.486576	1.39582	1.72206	0.933802	1.07052	1.28082	0.604381	1.42534	1.20635	1.03986	1.33369	0.998692	1.20138	0.72709	0.555701	1.3476	1.08628	1.37966	1.2457	0.933438	1.2789	1.17491	1.06012	1.94733	1.67833	1.6238	0.724218	0	0.704615	0.704615
chr22	26772104	26773829	chr22-26772104-DEL-1726	chr22	26750001	26775000	0.329272	0.387005	0	0.465123	0.376555	0.599181	0.562556	0.238095	0.70996	0	0.487924	0.259359	0.716599	0.538449	0	0.813472	0.509553	0.830183	0.411049	0.579875	0.0908616	0.298107	0.451079	0.79131	0.688509	0	0.507757	4	0.443077	0.443077
chr22	35249172	35250146	chr22-35249172-DEL-975	chr22	35230001	35255000	0.54616	0.779724	1.14085	1.11019	1.38458	0.978915	1.07592	0.897592	1.20158	0.785332	1.15595	0.922747	0.975934	1.14931	0.592609	1.5065	0	0.797888	1.28272	0.79648	0.655189	1.27581	0.494961	0.665424	1.23874	0.663084	1.14587	1	0.0974141	0.0974141
chr22	38217261	38217416	chr22-38217261-DEL-156	chr22	38200001	38225000	0.224103	0.372043	0	0	0	0	0.829172	0	0	0	0	0	0	0.391757	0	0	0	0.3679	0	0	0.495152	0	0	0	0	0.451587	0	20	0.571611	0.571611
chr22	40170415	40170488	chr22-40170415-DEL-74	chr22	40165001	40190000	0.27549	0.162545	0.506913	0.314906	0.758618	0	0.389958	0.468032	0.699963	0.542829	0.890914	0.439241	0.802994	0.505461	0.750357	0.675596	0.768045	0.78621	0.846194	0.440548	0.335819	0.59627	0.358657	0.57498	0.677041	0.395321	0.451561	1	0.181451	0.181451
chr22	40170743	40170832	chr22-40170743-DEL-90	chr22	40165001	40190000	0.27549	0.162545	0.506913	0.314906	0.758618	0	0.389958	0.468032	0.699963	0.542829	0.890914	0.439241	0.802994	0.505461	0.750357	0.675596	0.768045	0.78621	0.846194	0.440548	0.335819	0.59627	0.358657	0.57498	0.677041	0.395321	0.451561	1	0.446944	0.446944
chr22	44619543	44620007	chr22-44619543-DEL-465	chr22	44610001	44635000	0.230898	1.30554	1.05719	0.964599	0	0	0	0.923272	0	0	0	1.05156	0	0	1.65003	0	0.94801	0.847111	0.755461	0	1.10823	1.37508	0.938297	0	0	1.69096	0	13	0.362158	0.362158
chr22	44661127	44661192	chr22-44661127-DEL-66	chr22	44650001	44675000	0.575161	1.30554	0	0	1.18889	1.05591	0	0	1.78231	0.6962	0	1.05156	1.55917	0	1.65003	0	0	0	0	1.0665	0	1.37508	0	0	1.23787	0	0	15	0.832626	0.832626
chr22	44661127	44661192	chr22-44661127-DEL-66	chr22	44660001	44685000	0.575161	1.30554	0	0	0	0	0	0	1.78231	0.6962	0	0	1.55917	0	0	0	0	0	0	1.0665	0	1.37508	0	0	1.23787	0	0	19	0.395807	0.791614
chr22	44745164	44745218	chr22-44745164-DEL-55	chr22	44745001	44770000	0.486676	0	1.46519	1.13319	0	1.0901	1.25128	0	0.965492	1.35187	0.929789	0.807174	0	1.00796	0.881532	1.18521	1.02181	1.11729	0.612688	1.08911	0	0	0	0	0.542085	1.34777	0	9	0.656457	0.656457
chr22	45092481	45092543	chr22-45092481-DEL-63	chr22	45085001	45110000	0.407653	0.416745	0.340281	0.769114	0.867025	0.841652	1.30628	0.998029	1.06503	0.968037	0.998724	1.33223	0.637128	0.709051	0	0.818831	1.157	0.908107	1.09036	0.89271	1.36898	0.992277	0.567935	1.14644	0.877145	0	1.13618	2	0.216271	0.216271
chr22	45568566	45568803	chr22-45568566-DEL-238	chr22	45560001	45585000	0.338979	0.692358	1.01193	0.824699	0.569873	0.78587	0.631182	0.791104	0.571233	0.2929	0	0.536928	0.748768	0.499238	1.42873	0.935835	0.634686	0.6602	0.289712	0.639025	0.550024	0	0.870495	0.54553	0	0.868622	0.364232	3	0.498462	0.498462
chr22	45993509	45993720	chr22-45993509-DEL-212	chr22	45975001	46000000	1.14284	2.16154	2.54631	2.68595	2.89007	2.87442	1.92055	2.31655	2.24946	1.67263	2.44585	2.79317	2.49739	2.3653	3.26998	2.21749	2.34609	2.17716	2.38244	2.40825	2.47029	3.04413	2.54562	2.98123	2.97162	2.8491	2.60514	0	0.219796	0.219796
chr22	45993789	45993848	chr22-45993789-DEL-60	chr22	45975001	46000000	1.14284	2.16154	2.54631	2.68595	2.89007	2.87442	1.92055	2.31655	2.24946	1.67263	2.44585	2.79317	2.49739	2.3653	3.26998	2.21749	2.34609	2.17716	2.38244	2.40825	2.47029	3.04413	2.54562	2.98123	2.97162	2.8491	2.60514	0	0.0127717	0.0127717
chr22	46687276	46687338	chr22-46687276-DEL-63	chr22	46670001	46695000	0.197904	1.20561	0	0	0.34782	0	1.13324	0	0.866388	0	0	0	0.500465	0	0	0.761457	0	0.760913	0	0.718751	0	1.10583	0	0	0.985736	0	0	16	0.775995	0.775995
chr22	47211110	47211265	chr22-47211110-DEL-156	chr22	47190001	47215000	0.231574	0	0.642129	0	0.620339	0	0	0.958632	0.547092	0.852552	0	0	0	0	1.69517	0.873663	0.791011	0	0.470468	0.764292	0	0	0.559156	0.35153	0.489214	0	0.503542	12	0.812308	0.812308
chr22	47211447	47211935	chr22-47211447-DEL-489	chr22	47190001	47215000	0.231574	0	0.642129	0	0.620339	0	0	0.958632	0.547092	0.852552	0	0	0	0	1.69517	0.873663	0.791011	0	0.470468	0.764292	0	0	0.559156	0.35153	0.489214	0	0.503542	12	0.820769	0.820769
chr22	48514996	48515113	chr22-48514996-DEL-118	chr22	48500001	48525000	0.254012	0.793532	0	0.916512	0	1.11818	1.02721	1.01354	0.9817	0.99974	0	0	0.758444	1.12972	0.968584	0	0.911834	1.34945	0.818434	1.59783	1.05595	0	0.532247	0	1.25817	1.34127	0	8	0.128523	0.128523
chr22	49645044	49645370	chr22-49645044-DEL-327	chr22	49640001	49665000	0.201003	0	0.471844	0.294507	0	0.342018	0	0.310783	0.426843	0	0	0	0	0.298571	0.378303	0.871311	0.359463	0.563812	0.596703	0	0.804151	0	0.187718	0	0.770477	0.199615	0	11	0.443029	0.443029
chr22	50053912	50053988	chr22-50053912-DEL-77	chr22	50030001	50055000	0.332285	0.842828	0.961565	0	0.960469	0.601265	0.63899	0.808507	0.720532	0.408541	1.09495	0.763543	0.73824	0.902281	0.528188	0	1.04246	0.929285	0.731665	1.36785	0.728307	0.754231	0.602073	0.971258	0.812585	0.688631	0.882947	2	0.567283	0.567283
chr22	50137784	50137841	chr22-50137784-DEL-58	chr22	50125001	50150000	0.525364	1.22517	1.21307	1.26171	0.976894	1.16885	0.941787	0.830483	1.07711	1.23483	0.76733	1.33556	0.778002	1.42618	0.417465	0.814817	1.07279	0.933102	0.996804	1.30633	0.626715	0.902323	1.15053	1.32665	1.0189	1.2393	0.724832	0	0.571611	0.571611
chr22	50147176	50147463	chr22-50147176-DEL-288	chr22	50125001	50150000	0.525364	1.22517	1.21307	1.26171	0.976894	1.16885	0.941787	0.830483	1.07711	1.23483	0.76733	1.33556	0.778002	1.42618	0.417465	0.814817	1.07279	0.933102	0.996804	1.30633	0.626715	0.902323	1.15053	1.32665	1.0189	1.2393	0.724832	0	0.143504	0.143504
chr22	50147198	50147293	chr22-50147198-DEL-96	chr22	50125001	50150000	0.525364	1.22517	1.21307	1.26171	0.976894	1.16885	0.941787	0.830483	1.07711	1.23483	0.76733	1.33556	0.778002	1.42618	0.417465	0.814817	1.07279	0.933102	0.996804	1.30633	0.626715	0.902323	1.15053	1.32665	1.0189	1.2393	0.724832	0	0.721104	0.721104
chr22	50337601	50337663	chr22-50337601-DEL-63	chr22	50335001	50360000	1.16371	1.7997	1.30072	2.25083	1.98359	1.47017	2.15128	2.54468	1.97701	2.23219	1.49983	1.87274	1.23136	1.94182	1.37407	2.09595	1.80938	2.15761	0	2.09769	1.21815	2.14415	1.40214	1.95064	1.36258	1.72511	1.95974	1	0.976354	0.976354
chr22	50343932	50344717	chr22-50343932-DEL-786	chr22	50335001	50360000	1.16371	1.7997	1.30072	2.25083	1.98359	1.47017	2.15128	2.54468	1.97701	2.23219	1.49983	1.87274	1.23136	1.94182	1.37407	2.09595	1.80938	2.15761	0	2.09769	1.21815	2.14415	1.40214	1.95064	1.36258	1.72511	1.95974	1	0.498462	0.498462
chr22	50345573	50345680	chr22-50345573-DEL-108	chr22	50335001	50360000	1.16371	1.7997	1.30072	2.25083	1.98359	1.47017	2.15128	2.54468	1.97701	2.23219	1.49983	1.87274	1.23136	1.94182	1.37407	2.09595	1.80938	2.15761	0	2.09769	1.21815	2.14415	1.40214	1.95064	1.36258	1.72511	1.95974	1	0.75263	0.75263
chr22	50504097	50504231	chr22-50504097-DEL-135	chr22	50495001	50520000	0.736356	1.33243	1.18524	1.31671	1.27819	1.27677	1.59591	1.53328	1.14544	1.2962	1.26848	1.23929	1.31786	1.3859	1.66184	1.42503	1.18106	1.27607	1.33388	1.09464	1.28396	1.14417	0.781313	1.65447	1.51164	0.790831	1.36009	0	0.49	0.49
chr22	50507736	50507825	chr22-50507736-DEL-90	chr22	50495001	50520000	0.736356	1.33243	1.18524	1.31671	1.27819	1.27677	1.59591	1.53328	1.14544	1.2962	1.26848	1.23929	1.31786	1.3859	1.66184	1.42503	1.18106	1.27607	1.33388	1.09464	1.28396	1.14417	0.781313	1.65447	1.51164	0.790831	1.36009	0	0.221538	0.221538
chr22	50511352	50511707	chr22-50511352-DEL-356	chr22	50495001	50520000	0.736356	1.33243	1.18524	1.31671	1.27819	1.27677	1.59591	1.53328	1.14544	1.2962	1.26848	1.23929	1.31786	1.3859	1.66184	1.42503	1.18106	1.27607	1.33388	1.09464	1.28396	1.14417	0.781313	1.65447	1.51164	0.790831	1.36009	0	0.260831	0.260831
chr22	50616779	50616922	chr22-50616779-DEL-144	chr22	50615001	50640000	0.902523	1.6256	1.13231	1.45307	1.70626	1.37439	1.84099	1.1942	1.33485	1.46529	1.50341	1.13375	2.05481	1.56595	1.25727	1.16508	1.36544	1.06082	1.36247	1.78252	1.24204	1.58445	1.23929	1.58304	1.5415	1.34507	1.62798	0	1	1
chr3	187092	192724	chr3-187092-DEL-5633	chr3	165001	190000	0.247681	0.0313131	0	0.386708	0	0	0.89272	0.648096	0	0	0	0	0	0	0.226602	0	0.330063	0	0.293857	0	0.429025	0	0.455592	0	0	0	0	17	0.0684243	0.0684243
chr3	5234144	5234313	chr3-5234144-DEL-170	chr3	5210001	5235000	1.1247	2.11723	2.12411	1.77472	2.28658	1.91128	1.6841	1.54928	1.90932	2.30656	2.11312	2.0194	1.79752	1.95731	1.78254	1.653	2.66941	2.42676	1.962	1.39523	1.5354	2.55122	2.11528	2.12026	2.51162	1.44909	2.41483	0	0.285247	0.285247
chr3	8307756	8307827	chr3-8307756-DEL-72	chr3	8295001	8320000	0.224869	0.437785	0.536695	0.545974	0.5132	0.62056	0.388858	0.15553	0.439166	0	0	0.445694	0.406442	0	0.474757	0.538172	0.54444	0.661836	0.511702	0.508738	0	0	0.692662	0.594805	0.463452	0.389025	0.388893	5	0.789741	0.789741
chr3	8411765	8412165	chr3-8411765-DEL-401	chr3	8410001	8435000	0.458473	0.746702	0.735973	0.659312	1.03166	1.03306	0.627773	0.30339	0.77674	0.670814	0.463362	0.949577	0.610301	0.940174	0.718071	0.659888	1.35245	1.01265	0.944737	0.775503	0.675182	0.954848	1.3541	0.97737	0.683597	0.662077	1.15724	0	1	1
chr3	8412375	8412474	chr3-8412375-DEL-100	chr3	8410001	8435000	0.458473	0.746702	0.735973	0.659312	1.03166	1.03306	0.627773	0.30339	0.77674	0.670814	0.463362	0.949577	0.610301	0.940174	0.718071	0.659888	1.35245	1.01265	0.944737	0.775503	0.675182	0.954848	1.3541	0.97737	0.683597	0.662077	1.15724	0	0.367011	0.367011
chr3	11057677	11057746	chr3-11057677-DEL-70	chr3	11045001	11070000	0.267435	0.863195	0.451772	0.486045	0.514225	0.712869	0.429221	0.514527	0	0.421126	0.74742	0.318375	0.39848	0.82934	0	0	0.351664	0.190716	0	0.573771	0.57346	0.326414	0.418809	1.17555	0.451527	0.312746	0.868268	4	0.78101	0.78101
chr3	11573265	11573316	chr3-11573265-DEL-52	chr3	11550001	11575000	0.286059	0	0	0.863214	0.442766	0	0.388924	0.594727	0	0.416092	0	0.218199	0	0.779599	0	0.336172	0.566172	1.17837	0.824756	0	0.712661	0.735668	0.242051	0	0.820997	0.038244	0.500832	9	0.959358	0.959358
chr3	14119423	14119496	chr3-14119423-DEL-74	chr3	14100001	14125000	0.672116	0.98378	1.60461	1.09721	1.46822	1.29543	0.964368	0.830271	1.26509	1.69973	1.50994	1.22295	0.906788	0.947771	1.78622	1.04224	1.51728	1.19621	1.22086	0.843898	1.58261	1.08051	0.839714	0.997736	1.36608	1.25883	1.36862	0	0.801034	0.801034
chr3	15592531	15592698	chr3-15592531-DEL-168	chr3	15585001	15610000	0.496715	1.41146	1.64698	1.46204	1.53347	1.69988	1.41357	1.57826	1.34012	1.55521	1.44887	1.27291	1.276	1.38971	1.62095	1.45764	1.45632	1.05349	1.29647	1.72307	1.16259	1.81281	1.41171	1.64163	1.42084	1.3238	1.88187	0	0.35738	0.35738
chr3	15592531	15592614	chr3-15592531-DEL-84	chr3	15585001	15610000	0.496715	1.41146	1.64698	1.46204	1.53347	1.69988	1.41357	1.57826	1.34012	1.55521	1.44887	1.27291	1.276	1.38971	1.62095	1.45764	1.45632	1.05349	1.29647	1.72307	1.16259	1.81281	1.41171	1.64163	1.42084	1.3238	1.88187	0	0.722609	0.722609
chr3	17148682	17148782	chr3-17148682-DEL-101	chr3	17140001	17165000	0.276386	0	0.278715	0.756206	0.540536	0.492997	0.457313	0.406356	0.456555	0.556756	0.0879253	0.404372	0.267658	0.695052	0	0.633607	0	0.24954	0	0.420506	0.374359	0.585829	0.463307	0.77891	0	0	0.69823	6	0.164177	0.164177
chr3	25657906	25658072	chr3-25657906-DEL-167	chr3	25635001	25660000	0.633317	0	0	1.1583	0	0.984637	0	0	0	0.79574	0	0.959645	0.813913	1.0576	1.19486	0.706842	0	0	1.0684	0	1.05219	1.02444	1.07992	0	1.33592	0	0	13	0.237857	0.237857
chr3	26745215	26745534	chr3-26745215-DEL-320	chr3	26725001	26750000	0.179837	0.43299	0.375079	0.467259	0	0.378805	0.425646	0.524811	0.25295	0.90212	0.254039	0	0.380362	0.516892	0	0.490935	0.281832	0.379835	0.361688	0.278714	0.445268	0	0.42508	0.469191	0.399346	0.368856	0.498089	4	0.443077	0.443077
chr3	32160267	32160597	chr3-32160267-DEL-331	chr3	32150001	32175000	0.581801	0.824759	0.809084	0.797905	0.839069	0.999733	0.601043	0.935068	0.716915	0.746129	0.764483	0.74074	0.539851	0.929758	1.04753	0.815273	1.05518	1.06613	1.07432	0.998841	0.718239	1.36655	0.676697	1.26246	1.03681	1.02666	0.803657	0	0.196273	0.196273
chr3	32162370	32162651	chr3-32162370-DEL-282	chr3	32150001	32175000	0.581801	0.824759	0.809084	0.797905	0.839069	0.999733	0.601043	0.935068	0.716915	0.746129	0.764483	0.74074	0.539851	0.929758	1.04753	0.815273	1.05518	1.06613	1.07432	0.998841	0.718239	1.36655	0.676697	1.26246	1.03681	1.02666	0.803657	0	0.196273	0.196273
chr3	32379090	32379238	chr3-32379090-DEL-149	chr3	32355001	32380000	0.597024	0.903096	1.22572	1.22165	1.4664	1.30014	1.28758	1.19163	1.40161	1.35678	1.54898	1.12618	1.09789	1.58836	1.15259	1.25987	0.985056	1.11732	1.01035	1.24581	1.27573	1.3443	1.25326	0.788296	1.21047	0.967368	1.27159	0	0.344615	0.344615
chr3	34250716	34250777	chr3-34250716-DEL-62	chr3	34250001	34275000	0.333396	0.714939	0.66494	0.503795	0.528735	0.681396	0.41156	0.558099	0.595182	0.351488	0.600218	0.543596	0.534356	0.436636	0.668347	0.723241	0.297038	0.608076	0.502287	0.564367	0.307196	0.562703	0.620339	1.37096	0.30827	0.577176	0.743855	0	0.979843	0.979843
chr3	34250752	34250882	chr3-34250752-DEL-131	chr3	34250001	34275000	0.333396	0.714939	0.66494	0.503795	0.528735	0.681396	0.41156	0.558099	0.595182	0.351488	0.600218	0.543596	0.534356	0.436636	0.668347	0.723241	0.297038	0.608076	0.502287	0.564367	0.307196	0.562703	0.620339	1.37096	0.30827	0.577176	0.743855	0	0.918817	0.918817
chr3	34250906	34250966	chr3-34250906-DEL-61	chr3	34250001	34275000	0.333396	0.714939	0.66494	0.503795	0.528735	0.681396	0.41156	0.558099	0.595182	0.351488	0.600218	0.543596	0.534356	0.436636	0.668347	0.723241	0.297038	0.608076	0.502287	0.564367	0.307196	0.562703	0.620339	1.37096	0.30827	0.577176	0.743855	0	0.527029	0.527029
chr3	38113450	38113584	chr3-38113450-DEL-135	chr3	38105001	38130000	0.752757	1.65903	1.5971	0.999705	1.31207	1.61975	1.52558	1.136	1.55921	1.3105	1.49392	1.34088	0.917813	1.28134	0	1.5786	1.94647	1.63076	1.7238	1.54221	1.18821	1.64246	1.01492	0.569147	1.76282	1.09068	1.23678	1	0.571611	0.571611
chr3	39197875	39197934	chr3-39197875-DEL-60	chr3	39175001	39200000	0.721961	1.79109	1.86028	1.7718	2.00894	1.79578	1.61415	1.89649	1.87577	1.3693	1.75978	1.55024	1.34065	1.65381	1.555	1.81818	1.43829	1.84262	1.60143	1.54765	1.38823	1.95843	1.88029	1.17862	1.70396	1.88868	2.0664	0	0.97937	0.97937
chr3	44510750	44510799	chr3-44510750-DEL-50	chr3	44510001	44535000	0.570693	1.05812	0.802022	0.781656	0.982618	0.978938	0.551524	0.990109	0.789021	0.721213	0.554754	0.670343	0.61355	1.03329	0.741442	0.77143	0.885284	0.934999	0.984857	1.04068	0	1.31635	0.804556	1.03145	0.925799	0.688602	0.78276	1	0.0390653	0.0390653
chr3	45031804	45031874	chr3-45031804-DEL-71	chr3	45025001	45050000	0.543818	0.885861	0.923694	1.4143	0.924985	1.34456	1.23191	1.01306	0.849857	0.999047	1.00917	1.02037	1.40018	1.33147	1.36654	1.3348	0.976155	1.3342	1.13161	1.40894	1.17349	0.975876	1.04769	1.16971	1.02149	0.783558	1.13814	0	0.351706	0.351706
chr3	45675544	45675615	chr3-45675544-DEL-72	chr3	45675001	45700000	0.878795	1.07519	1.01723	1.24076	1.15457	1.26617	1.35267	1.03596	0.997967	1.79779	1.07905	1.28848	0.988189	1.22561	0	1.21261	1.15327	1.61334	1.30428	1.14443	0.930852	1.1515	1.32214	1.42258	1.08023	1.20044	1.05086	1	0.723619	0.723619
chr3	46741151	46741206	chr3-46741151-DEL-56	chr3	46735001	46760000	0.194064	0	0	0	0	0	0	0	0	0	0	0	0	0	0	0.55607	0	0	0	0	0	0	0	0	0	0	0	25	0.762311	0.762311
chr3	46754014	46809681	chr3-46754014-DEL-55668	chr3	46735001	46760000	0.194064	0	0	0	0	0	0	0	0	0	0	0	0	0	0	0.55607	0	0	0	0	0	0	0	0	0	0	0	25	0.921476	0.921476
chr3	48400316	48400377	chr3-48400316-DEL-62	chr3	48385001	48410000	0.333389	1.34547	0	1.56087	0	0	0	0	0	0	0.555149	0	0	1.2665	0	0	0	0	0	1.26641	0	0	1.24996	0	0	0	0	20	0.744615	0.744615
chr3	48561634	48561724	chr3-48561634-DEL-91	chr3	48545001	48570000	0.754909	1.14651	1.07491	1.08969	1.31516	1.07657	1.24299	1.03378	0.93769	1.17914	0.998858	1.31076	1.674	1.28033	0	0	0.899472	1.28926	0.971312	1.00891	0.817807	1.34319	1.05152	1.1536	1.0535	0	1.19451	3	0.801042	0.801042
chr3	49160317	49160639	chr3-49160317-DEL-323	chr3	49155001	49180000	0.290027	0	0	0	0	0	0.528392	0	0	0	0.668557	0	0.870781	0	0	0.817807	0.787722	0	0.985216	0.564051	1.17852	0	0.599136	0	1.12896	0.802407	0	15	0.446944	0.446944
chr3	49456844	49457172	chr3-49456844-DEL-329	chr3	49455001	49480000	0.680783	0.763391	1.18928	1.54274	1.50624	1.02711	0.747238	1.03308	1.13057	1.15431	1.20424	1.01486	0.945025	1.12373	1.47175	1.23832	0.533692	0.88762	0.855507	1.01458	1.09234	1.31259	1.26173	1.47183	1.46138	0.866539	1.36296	0	0.230769	0.230769
chr3	49938712	49939484	chr3-49938712-DEL-773	chr3	49925001	49950000	0.54458	1.09019	1.02998	1.18015	0.543324	1.14812	0.968477	0.971747	1.38432	0.834008	1.13414	1.07153	0	0.693936	0.695275	0.894101	1.18389	1.29803	1.07973	1.3362	1.09415	1.10204	0.924013	0.59796	1.4505	1.17049	1.21646	1	0.959358	0.959358
chr3	52675822	52676156	chr3-52675822-DEL-335	chr3	52670001	52695000	0.492165	1.26426	0.705812	0.862682	0.766582	0.77646	0	0.803689	0.912737	1.23731	0.500102	0.847866	0.931566	0.648397	0.753429	0.824864	0.900609	0.547993	0.668335	1.04488	0.853876	1.16805	0.394373	1.12767	0.725505	1.06539	0.800248	1	0.704507	0.704507
chr3	57747921	57747971	chr3-57747921-DEL-51	chr3	57745001	57770000	0.643847	0.773367	0.725464	0.412619	0.915872	0.8314	0.701432	0.936893	0.924275	1.27171	0.836502	0.686131	0.521662	0.73062	0.403512	0.760466	1.06887	0.861373	0.525656	0.764699	0.477492	0.586202	0.471453	0.737173	0.747692	0.543	0.60746	0	0.736605	0.736605
chr3	58549052	58551597	chr3-58549052-DEL-2546	chr3	58535001	58560000	0.791064	1.5971	1.30623	1.23914	1.31518	1.48415	1.14774	1.44701	1.40875	1.5077	1.3237	0.90703	1.23046	1.46175	1.38853	1.52508	1.43919	1.55711	0.989843	1.1919	1.12482	1.49678	1.32471	1.80821	1.59932	1.39955	1.38395	0	0.0539687	0.0539687
chr3	59215276	59215339	chr3-59215276-DEL-64	chr3	59195001	59220000	0.509226	0.771367	0.876165	1.05949	1.02606	0.866309	0.546137	0.992318	1.37184	0.909343	0	1.23462	0.755583	0.894881	0.634326	0.481663	1.10604	1.23169	1.1333	1.0789	1.08381	1.5671	0.425052	0.929834	1.53539	0.984937	0.937922	1	0.0198003	0.0198003
chr3	69314156	69314227	chr3-69314156-DEL-72	chr3	69300001	69325000	1.00317	1.90846	2.14359	1.7215	1.64312	1.79488	1.60082	1.33705	1.70066	1.77174	1.19215	1.73655	1.57638	1.3316	1.12269	2.11809	1.5574	2.24463	1.71142	1.68447	1.88358	2.07313	1.51774	1.40191	1.87441	1.46986	1.48454	0	0.263376	0.263376
chr3	72074473	72074638	chr3-72074473-DEL-166	chr3	72070001	72095000	0.497437	0.877755	0.989187	0.93211	1.24744	1.07636	0.823476	0.71627	0.921996	0.698329	1.21671	0.903562	0.977282	0.477621	1.1778	1.61063	1.20861	1.50803	1.04391	0.626371	0.984935	1.8378	0.686271	0.687968	1.51789	0.656097	1.59477	0	0.94	0.94
chr3	75678584	75678657	chr3-75678584-DEL-74	chr3	75655001	75680000	0.324114	0	0	0.725103	0	0.6695	0.998424	0	0.566589	0.593933	0.528376	0	0.870536	0.762602	0	1.06831	1.02068	0.819711	0.432801	0.978173	0	0.581508	0.987185	0.809102	0.656335	0.867296	0.833336	7	0.0595956	0.0595956
chr3	82152797	82154842	chr3-82152797-DEL-2046	chr3	82135001	82160000	0.312794	0.480732	0.628685	0.693265	0.434372	0.541882	0.477124	0	0.658171	0.711913	0.683439	0.611477	0.660866	0.354856	0.5915	0.973362	0	0.731751	0.598973	0.606797	0.419606	0.841435	0	0	0.837643	0.692472	0.787468	4	0.979843	0.979843
chr3	84908905	84909035	chr3-84908905-DEL-131	chr3	84890001	84915000	0.24509	0.685173	0	0.369883	0.846114	0.427347	0.811804	0	0.426314	0	0	0	0.57121	0	0.163368	0	0	0.589773	0.421621	0.694805	0.362226	0.664351	0.620795	0.584235	0.711881	0.219085	0.413103	8	0.0828302	0.0828302
chr3	100587904	100588223	chr3-100587904-DEL-320	chr3	100580001	100605000	0.5631	0.963727	1.16296	0.915222	0.877144	1.09947	0.926662	0.766343	0.971422	1.35049	0.891713	0.976837	1.35272	0.995741	0.685497	1.23512	1.02214	1.05017	0.941738	0.932288	0.78656	0.959762	0.874736	0.766689	0.77394	1.01493	1.09053	0	0.0604465	0.0604465
chr3	102564931	102565268	chr3-102564931-DEL-338	chr3	102545001	102570000	0.216364	0.427583	0.443759	0	0.40496	0	0	0	0.41766	0.472883	0	0	0.54858	0.696089	0.410905	0	0.47739	0.480634	0	0.522493	0.487829	1.03476	0	0.262455	0.597622	0.546479	0.63145	9	0.569474	0.569474
chr3	106073586	106074067	chr3-106073586-DEL-482	chr3	106065001	106090000	0.19084	0.188387	0.422232	0.494487	0.400706	0.480337	0.39869	0	0.309288	0.256481	0.799149	0.257673	0	0	0.24971	0	0.134777	0	0.432943	0	0.519612	0.165798	0.482394	0.323209	0.475907	0.51557	0	7	0.899787	0.899787
chr3	106074252	106074328	chr3-106074252-DEL-77	chr3	106065001	106090000	0.19084	0.188387	0.422232	0.494487	0.400706	0.480337	0.39869	0	0.309288	0.256481	0.799149	0.257673	0	0	0.24971	0	0.134777	0	0.432943	0	0.519612	0.165798	0.482394	0.323209	0.475907	0.51557	0	7	0.744473	0.744473
chr3	106074348	106074784	chr3-106074348-DEL-437	chr3	106065001	106090000	0.19084	0.188387	0.422232	0.494487	0.400706	0.480337	0.39869	0	0.309288	0.256481	0.799149	0.257673	0	0	0.24971	0	0.134777	0	0.432943	0	0.519612	0.165798	0.482394	0.323209	0.475907	0.51557	0	7	0.899787	0.899787
chr3	106633986	106634053	chr3-106633986-DEL-68	chr3	106615001	106640000	0.619162	1.06128	1.15548	1.05595	0.925334	0.983297	0.977989	1.05835	1.02201	0.872738	0.957643	1.23736	1.22697	0.934387	0.970674	0.87371	1.59964	0.877238	1.12333	0.597743	0.974392	1.31162	0.751364	0.805337	1.73517	0.827289	1.27349	0	0.840251	0.840251
chr3	111524881	111530185	chr3-111524881-DEL-5305	chr3	111530001	111555000	0.486817	1.03503	0.950665	1.35521	0.79269	0	1.29673	1.23097	0	0	0.888355	1.24175	1.13823	0.984589	1.23039	0	0.663686	1.08386	0.999678	0.993072	1.28352	1.18437	0.797574	0.834634	0.973114	1.15024	0.918455	4	0.801042	0.801042
chr3	113941871	113942165	chr3-113941871-DEL-295	chr3	113930001	113955000	0.473689	0.590922	0.732731	0.710655	0.877877	0.998626	0.98081	1.18589	0.786596	0.741515	1.01606	0.701792	0.687063	1.21217	0.754986	0.98826	0.87826	0.865179	0.978158	0.720838	0.626036	0.90061	1.01209	1.14006	0.868201	0.927724	1.05776	0	0.53356	0.53356
chr3	119701067	119701494	chr3-119701067-DEL-428	chr3	119680001	119705000	1.21516	1.87435	2.3345	2.04774	2.07307	2.03964	1.6328	1.65747	1.78892	1.89741	1.90175	1.92111	1.53041	1.99273	1.84773	2.11181	1.9599	1.68275	1.83369	2.00297	1.71333	2.20405	1.90798	2.11687	1.77381	1.51129	1.83891	0	0.938176	0.938176
chr3	121554965	121555080	chr3-121554965-DEL-116	chr3	121530001	121555000	1.11299	1.98948	1.84113	1.8317	1.91162	1.98681	1.45628	2.19447	1.77496	1.64191	1.71507	1.70806	1.86523	2.0309	1.54367	1.80174	2.04621	1.69007	1.95342	1.89463	1.72737	2.389	1.78358	1.84896	1.64319	1.81093	2.08164	0	0.595155	0.595155
chr3	124750365	124750414	chr3-124750365-DEL-50	chr3	124730001	124755000	0.509516	1.65282	1.4024	1.83456	0	1.77395	1.5337	1.7399	1.48641	0	1.53453	1.46081	1.64143	1.62081	1.49573	0	1.40286	0	0	1.83513	1.07173	1.79941	1.83296	2.10146	1.36751	1.5285	1.55029	5	0.897126	0.897126
chr3	125217452	125218319	chr3-125217452-DEL-868	chr3	125200001	125225000	0.498986	0.944446	1.1527	1.02941	1.30484	0.506257	0.902569	0.668456	0.711588	1.0964	0.611865	1.29199	0.910031	0.848899	2.16704	1.14739	1.54905	1.02139	1.08477	0.930863	1.37024	1.12811	0.758182	0.879361	0.870685	0.978903	1.16804	0	0.0972623	0.0972623
chr3	126476106	126476185	chr3-126476106-DEL-80	chr3	126475001	126500000	0.498627	1.00285	0.688752	0	0	0.524434	0.650879	0	1.09983	0.889227	0.915703	0.667537	0.785342	0.833804	0.48127	0.724623	1.07721	0.986707	0.934954	1.0109	0.809019	1.02693	0	0	0.76394	0.940242	0	6	1	1
chr3	129376489	129376610	chr3-129376489-DEL-122	chr3	129370001	129395000	0.348663	0	1.05394	1.09847	0.764004	0	0	0.373753	0	0	1.10923	0	0	0	0	0	0	0.782741	0.42502	1.13182	0	0	0	0	0	0	0	18	0.976354	0.976354
chr3	129465625	129465934	chr3-129465625-DEL-310	chr3	129455001	129480000	0.445926	0.79532	0.947279	1.31572	0.959496	1.02123	1.04055	0.759485	0	0.885928	1.03549	0.84092	0.85665	0.794903	1.22593	0.945624	1.10471	1.09015	1.01951	0.941151	0.932639	0.989705	0	0.961837	0	1.01152	0	4	0.0868575	0.173715
chr3	129465625	129465934	chr3-129465625-DEL-310	chr3	129460001	129485000	0.445926	0.79532	0.947279	1.31572	0.959496	1.02123	1.04055	0.759485	0.839183	0	1.03549	0.84092	0.85665	0.794903	1.22593	0.945624	1.10471	1.09015	1.01951	0.941151	0.932639	0.989705	0.9115	0.961837	0.985694	1.01152	0	2	0.182384	0.182384
chr3	129818402	129818476	chr3-129818402-DEL-75	chr3	129815001	129840000	0.527199	0.863613	0.785723	1.37049	0.992476	1.06847	0.852397	0.835048	1.07661	1.47802	1.0774	0.737255	0.788582	0.642922	0.774623	1.18824	0.951778	1.0551	1.05284	1.06628	0.934416	1.30529	0.733574	1.44879	1.14928	0.673445	1.04651	0	0.263376	0.263376
chr3	129818402	129818576	chr3-129818402-DEL-175	chr3	129815001	129840000	0.527199	0.863613	0.785723	1.37049	0.992476	1.06847	0.852397	0.835048	1.07661	1.47802	1.0774	0.737255	0.788582	0.642922	0.774623	1.18824	0.951778	1.0551	1.05284	1.06628	0.934416	1.30529	0.733574	1.44879	1.14928	0.673445	1.04651	0	0.567283	0.567283
chr3	129938477	129939024	chr3-129938477-DEL-548	chr3	129920001	129945000	0.654148	1.27547	1.06489	1.44247	1.44253	1.49484	1.08665	0	1.244	1.07679	1.22543	1.41667	1.0871	1.37733	0.719163	1.71776	1.53827	1.39171	1.27858	1.59586	1.16533	1.97221	1.24723	0.851567	1.6309	1.1885	1.71984	1	0.426265	0.426265
chr3	132215300	132215407	chr3-132215300-DEL-108	chr3	132200001	132225000	0.403638	0	0.734458	0	1.14147	0	1.21269	0	0	1.3134	1.12951	0.787335	0	1.20744	0	0	0	1.00794	0	0	1.04417	0	1.02336	0	0.740813	0	0.934447	14	0.461317	0.461317
chr3	133418008	133418115	chr3-133418008-DEL-108	chr3	133415001	133440000	0.814173	1.62431	1.5781	1.34853	1.25285	0	1.36581	1.58862	1.43466	1.38206	1.73423	1.49704	1.28045	1.80495	1.41078	1.5147	1.31021	1.27806	1.03109	0	0.93794	1.29632	0	2.00823	1.68458	1.39505	1.3377	3	0.338814	0.338814
chr3	134575293	134575508	chr3-134575293-DEL-216	chr3	134570001	134595000	0.474794	1.10124	0.640515	0.811687	0.951333	0.820692	0.828154	0.809358	0.647667	0.888656	1.10275	0.892571	0	0.852665	0.904415	0.962778	0.780285	0.992186	0.897114	0.928004	0.711423	1.08614	0.758731	0	1.12516	1.15034	0.486206	2	0.791615	0.791615
chr3	138050638	138050842	chr3-138050638-DEL-205	chr3	138045001	138070000	1.04066	1.68413	1.43993	1.40015	1.77991	1.55057	1.82108	1.76122	1.45934	1.86612	1.46615	1.7103	1.292	1.62269	1.31031	1.08395	1.56653	1.68486	1.55894	1.68692	1.508	2.12749	1.93094	1.29723	1.50079	1.36735	1.81127	0	0.393846	0.393846
chr3	141931214	141931293	chr3-141931214-DEL-80	chr3	141915001	141940000	0.246367	0.491826	0.691074	0.552217	0.553676	0	0	0.366633	0.480888	0.444583	0	0.396768	0.377739	0.916583	1.12165	0.851469	1.1876	0.387243	0.440593	1.03278	0.414022	0.890974	0.396891	0.428806	0.633579	0.897886	0.680746	3	0.373883	0.373883
chr3	143889675	143889856	chr3-143889675-DEL-182	chr3	143865001	143890000	0.676874	1.44287	0.995787	1.13801	1.24474	1.32009	1.07844	0.929749	1.56498	1.66005	1.18623	1.16939	1.23438	1.31225	1.03648	1.16479	0.928916	1.33031	1.13824	1.28048	1.20055	1.13177	1.33113	1.44469	1.36804	1.21952	1.20379	0	0.976354	0.976354
chr3	143978619	143978682	chr3-143978619-DEL-64	chr3	143960001	143985000	1.18449	2.07566	1.65182	1.6558	2.29373	2.07126	2.22849	1.71909	1.89537	1.68059	1.87342	1.77083	1.76849	2.27838	1.53183	1.64041	2.04082	2.04512	1.61507	2.11504	1.78897	2.39937	1.60984	2.00552	1.59269	1.66452	1.29302	0	0.821365	0.821365
chr3	145273277	145273366	chr3-145273277-DEL-90	chr3	145260001	145285000	0.218929	0.332585	0.458747	0.353484	0.464609	0.346547	0.684553	0	0.641051	0.432159	0.399718	0	0.298441	0	0	0	0	0.587968	0.451705	0.179635	0	0.33207	0.299718	0.401311	0	0.139183	0	9	0.498462	0.498462
chr3	149550685	149552359	chr3-149550685-DEL-1675	chr3	149545001	149570000	0.421003	0	0	0	0	0	0.967807	0	0	0	0	0	0	0	0	0	0	0	0	0	0	0	0	0	0	0	0	25	0.742446	0.742446
chr3	151081300	151081349	chr3-151081300-DEL-50	chr3	151060001	151085000	0.281659	0	0	0	0.619596	0.263609	0.294285	0	0	0	0	0	0.387981	0.581822	0.399468	0	0.597933	0	0.196129	0.147311	0	0	0	0	0.234713	0	0	16	0.82009	0.82009
chr3	151293583	151293638	chr3-151293583-DEL-56	chr3	151285001	151310000	0.668161	0	1.1002	0.987179	1.61303	0	1.07086	0	0	0	0	0.988326	0	0	1.08755	1.16997	0	0	0	0	1.22815	1.20535	0	0	0	0	0	17	0.959358	0.959358
chr3	152599599	152599701	chr3-152599599-DEL-103	chr3	152585001	152610000	0.333257	0.982552	0.7009	0	0.630854	0.67519	0.689494	0.619353	0.849515	1.02663	0.76217	0.711466	0.669249	1.05893	0	0.97042	0.812633	0.487304	0.744351	0.491982	0.773614	0.916092	0.522035	0.585999	0.913594	0.728278	0.860006	2	0.705138	0.705138
chr3	158632951	158634122	chr3-158632951-DEL-1172	chr3	158625001	158650000	0.711666	1.69177	1.60857	1.64514	1.6937	1.37091	1.5226	1.37682	1.36022	0	0.779575	1.62966	1.04136	1.23774	1.59228	1.56279	1.54505	1.53321	1.20522	1.11347	1.09689	1.69343	1.05289	1.22566	1.88988	1.27301	1.68242	1	0.93959	0.93959
chr3	160019924	160019979	chr3-160019924-DEL-56	chr3	160015001	160040000	0.804797	1.60931	1.76895	2.18817	1.84558	1.82419	1.65541	1.70447	1.87042	2.02879	1.86268	1.75645	1.76604	1.79132	2.04788	1.95508	1.82329	1.66582	1.71638	1.58354	1.52861	1.94541	1.41538	1.60554	1.52038	1.77712	1.73892	0	0.286309	0.286309
chr3	162794345	162908545	chr3-162794345-DEL-114201	chr3	162775001	162800000	0.765292	1.34068	0	0	0.826624	0.73055	0.962447	1.21737	0	0	0	0	0	0	0.68143	0.760913	0	0	0	0	0.460174	0.922557	0	0.131588	0.631159	0	0	15	0.230718	0.230718
chr3	162794345	162908545	chr3-162794345-DEL-114201	chr3	162905001	162930000	0.495076	0.735693	0	0	1.24413	0.638028	0.640779	0.822592	0	0	0	0	0.583105	0	0.583829	0.815597	0	0	0	0	0	1.20109	0	0	0	0	0	17	0.0725935	0.145187
chr3	162999524	163005765	chr3-162999524-DEL-6242	chr3	163005001	163030000	0.247133	0.0937422	0.590736	0	0.309462	0.354124	0.392585	0	0.0812951	0.296617	0.252456	0	0.286095	0.217081	0.270785	0.548696	0	0	0.465469	0.13809	0.335762	0.395918	0.233108	0	0.465781	0	0	8	0.0165474	0.0165474
chr3	172683107	172683427	chr3-172683107-DEL-321	chr3	172660001	172685000	0.463862	0.671439	0.674049	0.95968	0.460289	0.737064	1.43332	0.648107	0.714864	0.515536	0.523649	0.532093	0.6926	1.08053	0	0.652518	0.732518	0.314807	0.640177	0.688645	0.830263	1.03073	0.469657	0.959056	1.19824	0.480026	0.641807	1	0.134991	0.134991
chr3	181742904	181742993	chr3-181742904-DEL-90	chr3	181725001	181750000	0.278054	0.262963	0.17128	0.446458	0	0.407283	0	0.856632	0.504391	0.435766	0.345612	0	0.345878	0.593833	0.410827	0.170653	0	0	0.377326	0	0.422566	0	0	0	0	0.363274	0	11	0.659889	0.659889
chr3	191423222	191423278	chr3-191423222-DEL-57	chr3	191400001	191425000	0.718557	1.8841	1.73034	1.42575	1.3438	1.70535	1.59305	1.66197	1.48754	1.71762	1.34544	1.50242	1.08224	1.80479	1.45484	1.34856	1.53536	1.80609	1.63105	1.5746	1.36473	1.60389	1.43589	1.58786	1.3107	1.606	1.695	0	0.409486	0.409486
chr3	192810357	192810430	chr3-192810357-DEL-74	chr3	192795001	192820000	1.14013	1.21767	2.69902	1.97635	1.44883	2.58056	1.9216	1.8613	1.38661	2.51947	2.65712	2.99552	2.20458	3.11682	2.31142	2.14543	1.94323	2.82401	1.53415	2.84621	2.03774	1.91722	2.57374	3.25054	1.25956	2.52252	3.09726	0	0.75263	0.75263
chr3	193582746	193582797	chr3-193582746-DEL-52	chr3	193575001	193600000	0.747952	1.81809	1.49057	1.62654	1.82378	1.80239	1.57759	1.84991	1.63943	1.80629	1.49599	1.73598	1.63608	1.48652	1.52457	1.65727	1.51909	1.55687	1.31332	1.57289	1.13653	2.11056	1.49026	2.03134	1.78364	1.3737	1.75534	0	0.704507	0.704507
chr3	194152387	194152454	chr3-194152387-DEL-68	chr3	194130001	194155000	0.751377	1.29653	1.32873	1.62324	1.15572	1.35878	1.05392	1.13569	1.40745	1.55006	1.22329	1.37102	0.97731	1.04096	0.863792	1.00109	1.54883	1.55058	1.3151	1.30707	0.749174	1.89807	0.519022	1.00248	1.58598	0.979467	1.63636	0	0.0868575	0.0868575
chr3	194400436	194401192	chr3-194400436-DEL-757	chr3	194395001	194420000	0.513211	0.497681	0.50556	1.16152	0.538062	0	1.02242	0.619619	0.430883	0.701106	1.05472	0.775414	0.857537	0	0.0479674	0.755598	0.209114	0	1.33432	0	0.46151	0.156186	0.343258	1.41108	0	1.16619	0.706138	5	0.93959	0.93959
chr3	194677954	194679561	chr3-194677954-DEL-1608	chr3	194665001	194690000	0.720505	1.37388	1.04477	1.52712	1.46048	1.29694	1.40116	1.03149	1.34771	1.03227	1.14289	1.41745	1.04129	1.43402	1.22539	1.69634	1.24863	1.14623	1.40511	1.56048	1.51512	1.46339	0.96185	0.891558	1.60542	1.34326	1.66404	0	0.283077	0.283077
chr3	195109836	195110125	chr3-195109836-DEL-290	chr3	195090001	195115000	0.513726	0.781299	0.829392	0.965685	0.878917	1.07857	1.00333	0.783842	0.978892	0.963779	1.25923	1.2001	0.855795	1.04593	1.08496	1.22442	1.12369	1.16323	1.16231	1.63441	0.598328	1.1295	1.39374	0.644906	1.05168	1.07237	1.04939	0	0.882274	0.882274
chr3	195272792	195272947	chr3-195272792-DEL-156	chr3	195250001	195275000	1.55122	2.4866	3.11178	2.71372	3.16595	3.45695	3.00501	2.99283	3.01612	3.04493	2.96585	3.15468	2.83263	3.20241	3.20966	3.20627	3.21854	2.56174	3.11464	3.58751	2.9892	3.15243	2.86248	2.71966	3.29303	2.12154	2.65569	0	0.93959	0.93959
chr3	195613341	195613474	chr3-195613341-DEL-134	chr3	195610001	195635000	0.887852	0	0	2.25114	0	1.84816	0	0	1.92792	0	0	0.852805	1.81737	0	0	2.34282	1.58826	1.50615	1.30207	0	3.05764	2.44294	1.81315	0	1.46319	2.1983	0.951895	11	0.0232984	0.0232984
chr3	195619069	195619125	chr3-195619069-DEL-57	chr3	195610001	195635000	0.887852	0	0	2.25114	0	1.84816	0	0	1.92792	0	0	0.852805	1.81737	0	0	2.34282	1.58826	1.50615	1.30207	0	3.05764	2.44294	1.81315	0	1.46319	2.1983	0.951895	11	0.31612	0.31612
chr3	195840251	195840310	chr3-195840251-DEL-60	chr3	195835001	195860000	0.865487	1.41348	1.98953	1.9219	1.72968	2.04685	1.15445	1.39471	1.62764	1.69855	1.69597	1.29141	1.97647	2.04198	1.05102	1.35246	1.43542	1.26798	1.44839	1.73474	1.49306	1.68702	1.45677	1.54557	1.25915	1.72518	1.83579	0	0.850137	0.850137
chr3	195842346	195843061	chr3-195842346-DEL-716	chr3	195835001	195860000	0.865487	1.41348	1.98953	1.9219	1.72968	2.04685	1.15445	1.39471	1.62764	1.69855	1.69597	1.29141	1.97647	2.04198	1.05102	1.35246	1.43542	1.26798	1.44839	1.73474	1.49306	1.68702	1.45677	1.54557	1.25915	1.72518	1.83579	0	0.622736	0.622736
chr3	196207553	196207649	chr3-196207553-DEL-97	chr3	196195001	196220000	0.924138	2.19764	2.04797	2.05268	2.52384	1.94758	1.81594	1.61705	2.19057	1.83446	2.20104	2.25749	2.01602	2.51311	0	1.84754	2.0369	2.09776	2.03055	2.25947	0	1.60813	2.19798	2.12069	2.23507	2.18527	1.98702	2	0.835773	0.835773
chr3	196207588	196207783	chr3-196207588-DEL-196	chr3	196195001	196220000	0.924138	2.19764	2.04797	2.05268	2.52384	1.94758	1.81594	1.61705	2.19057	1.83446	2.20104	2.25749	2.01602	2.51311	0	1.84754	2.0369	2.09776	2.03055	2.25947	0	1.60813	2.19798	2.12069	2.23507	2.18527	1.98702	2	0.692308	0.692308
chr3	196317395	196317478	chr3-196317395-DEL-84	chr3	196315001	196340000	0.200376	0.57846	0.553643	0	0.573928	0.412305	0.648846	0.261071	0.508799	0.488904	0.0851701	0.328724	0.564149	0.737319	0.700631	0	0	0.595911	0.261371	0.398106	0.363498	0.309741	0	0.322334	0.723989	0.199404	0.0858857	4	0.230718	0.230718
chr3	196329048	196329975	chr3-196329048-DEL-928	chr3	196315001	196340000	0.200376	0.57846	0.553643	0	0.573928	0.412305	0.648846	0.261071	0.508799	0.488904	0.0851701	0.328724	0.564149	0.737319	0.700631	0	0	0.595911	0.261371	0.398106	0.363498	0.309741	0	0.322334	0.723989	0.199404	0.0858857	4	0.938176	0.938176
chr3	196334809	196335019	chr3-196334809-DEL-211	chr3	196315001	196340000	0.200376	0.57846	0.553643	0	0.573928	0.412305	0.648846	0.261071	0.508799	0.488904	0.0851701	0.328724	0.564149	0.737319	0.700631	0	0	0.595911	0.261371	0.398106	0.363498	0.309741	0	0.322334	0.723989	0.199404	0.0858857	4	0.874078	0.874078
chr3	197207702	197212376	chr3-197207702-DEL-4675	chr3	197190001	197215000	0.445822	0.822178	0.823018	0.777656	1.1155	0.960573	0.807351	0.888759	1.03066	0.881518	0.947338	1.03982	0.935803	0.849941	0.805573	0.897889	0.651161	1.02226	1.11513	1.15138	0.935414	1.22827	0.866609	0.898377	1.13832	1.06858	0.926617	0	0.734719	0.734719
chr3	197207702	197212376	chr3-197207702-DEL-4675	chr3	197195001	197220000	0.445822	0.822178	0.823018	0.777656	1.1155	0.960573	0.807351	0.888759	1.03066	0.881518	0.947338	1.03982	0.935803	0.849941	0.805573	0.897889	0.651161	1.02226	1.11513	1.15138	0.935414	1.22827	0.866609	0.898377	1.13832	1.06858	0.926617	0	0.734719	0.734719
chr3	197207702	197212376	chr3-197207702-DEL-4675	chr3	197205001	197230000	0.445822	0	0.823018	0.777656	1.1155	0.960573	0.807351	0.888759	1.03066	0.881518	0.947338	1.03982	0	0.849941	0.805573	0.897889	0.651161	1.02226	1.11513	1.15138	0	1.22827	0.866609	0.898377	0	1.06858	0.926617	4	0.734719	0.734719
chr3	197510616	197510684	chr3-197510616-DEL-69	chr3	197500001	197525000	0.349963	0.699131	0	0.742339	1.004	0.823767	0.630582	0.815061	0.9051	0	0.730949	1.07822	0	0	0	0.947912	0	0.445979	0	0.743511	0.509378	1.19239	0.729605	0	1.11837	0	0	10	0.856355	0.856355
chr3	197517476	197517527	chr3-197517476-DEL-52	chr3	197500001	197525000	0.349963	0.699131	0	0.742339	1.004	0.823767	0.630582	0.815061	0.9051	0	0.730949	1.07822	0	0	0	0.947912	0	0.445979	0	0.743511	0.509378	1.19239	0.729605	0	1.11837	0	0	10	0.121434	0.121434
chr3	197658832	197658951	chr3-197658832-DEL-120	chr3	197655001	197680000	0.839294	1.28302	0	0	1.22887	1.3958	0	1.57297	2.07661	1.07076	0.867914	0.577688	1.03849	1.08218	1.37865	0.622633	1.19038	0.996075	1.40143	1.01538	1.82822	2.00471	1.50982	0	1.33215	0	1.48613	5	0.00772271	0.00772271
chr3	197663503	197663552	chr3-197663503-DEL-50	chr3	197655001	197680000	0.839294	1.28302	0	0	1.22887	1.3958	0	1.57297	2.07661	1.07076	0.867914	0.577688	1.03849	1.08218	1.37865	0.622633	1.19038	0.996075	1.40143	1.01538	1.82822	2.00471	1.50982	0	1.33215	0	1.48613	5	0.736605	0.736605
chr3	197876879	197876950	chr3-197876879-DEL-72	chr3	197870001	197895000	0.502412	1.21148	0.950372	0.892345	1.03521	1.04878	0.557325	0	0	0.77084	1.02969	0.539966	0.772212	1.21005	1.03349	0.842136	0.688052	1.04109	0.856946	0.581416	0.712267	0.789584	0.764132	0.834422	0.936496	0.908953	0.775879	2	0.949802	0.949802
chr3	197877080	197877187	chr3-197877080-DEL-108	chr3	197870001	197895000	0.502412	1.21148	0.950372	0.892345	1.03521	1.04878	0.557325	0	0	0.77084	1.02969	0.539966	0.772212	1.21005	1.03349	0.842136	0.688052	1.04109	0.856946	0.581416	0.712267	0.789584	0.764132	0.834422	0.936496	0.908953	0.775879	2	0.224232	0.224232
chr4	519672	519783	chr4-519672-DEL-112	chr4	495001	520000	0.340432	0.877998	1.07055	0.772133	0	0	1.05186	1.47247	1.01244	0.868048	0.9145	0.746931	0.57271	0.502213	0.929458	0.524703	0.826912	0.873128	0.698262	0	1.06446	0	0.412615	0.686313	0.736616	0.60463	0	5	0.630785	0.630785
chr4	668525	668802	chr4-668525-DEL-278	chr4	655001	680000	0.972881	1.55772	1.84231	1.9394	1.65862	1.85802	2.25311	1.78485	1.03563	1.97219	1.72707	1.73234	1.95721	1.72896	2.47273	1.5601	2.16231	1.11132	1.45948	1.93787	1.23256	1.54239	1.29321	2.0469	1.57353	1.61854	2.27827	0	0.51694	0.51694
chr4	789912	790065	chr4-789912-DEL-154	chr4	770001	795000	0.349827	0.860156	0.716756	0	0.855301	0.727289	1.06029	0.515378	0.568922	0.580745	0.1151	0.484854	0.611017	0.712823	0	0.655175	0.589863	0.509682	0.525468	0.707114	0.813966	1.01764	0	0.420974	0.402301	0	0.887206	4	0.704507	0.704507
chr4	999843	1000015	chr4-999843-DEL-173	chr4	1000001	1025000	0.596946	1.15369	1.04502	1.15817	1.40128	1.501	0.930393	0.779994	0.914256	0.64548	1.17635	1.20382	0	0.86247	0.975402	1.37952	1.44807	1.45376	1.40664	1.45568	1.56068	1.9163	1.3982	1.03141	1.64278	1.86661	1.44363	1	0.474227	0.474227
chr4	1020855	1020917	chr4-1020855-DEL-63	chr4	1000001	1025000	0.596946	1.15369	1.04502	1.15817	1.40128	1.501	0.930393	0.779994	0.914256	0.64548	1.17635	1.20382	0	0.86247	0.975402	1.37952	1.44807	1.45376	1.40664	1.45568	1.56068	1.9163	1.3982	1.03141	1.64278	1.86661	1.44363	1	0.443029	0.443029
chr4	1273422	1273764	chr4-1273422-DEL-343	chr4	1270001	1295000	0.438375	0	0	0	0.889859	0	0.831562	0	0.627239	0	0.588311	1.10934	0	0.978463	0	0	0	0.766181	0.467849	0	0	0	0	1.26018	0.825268	0	0	16	0.395807	0.395807
chr4	1278823	1278952	chr4-1278823-DEL-130	chr4	1270001	1295000	0.438375	0	0	0	0.889859	0	0.831562	0	0.627239	0	0.588311	1.10934	0	0.978463	0	0	0	0.766181	0.467849	0	0	0	0	1.26018	0.825268	0	0	16	0.305786	0.305786
chr4	1283065	1283201	chr4-1283065-DEL-137	chr4	1270001	1295000	0.438375	0	0	0	0.889859	0	0.831562	0	0.627239	0	0.588311	1.10934	0	0.978463	0	0	0	0.766181	0.467849	0	0	0	0	1.26018	0.825268	0	0	16	0.863946	0.863946
chr4	1357097	1357260	chr4-1357097-DEL-164	chr4	1345001	1370000	0.649041	1.60027	2.14734	1.87296	0	2.3407	2.07214	0	1.61783	2.0199	1.64634	1.92444	2.17045	1.63385	1.94092	1.6732	0	1.07249	1.72624	1.75079	0	2.00766	0	1.63405	1.66256	1.96398	2.16777	5	0.397104	0.397104
chr4	1363937	1364000	chr4-1363937-DEL-64	chr4	1345001	1370000	0.649041	1.60027	2.14734	1.87296	0	2.3407	2.07214	0	1.61783	2.0199	1.64634	1.92444	2.17045	1.63385	1.94092	1.6732	0	1.07249	1.72624	1.75079	0	2.00766	0	1.63405	1.66256	1.96398	2.16777	5	0.910143	0.910143
chr4	1364240	1364303	chr4-1364240-DEL-64	chr4	1345001	1370000	0.649041	1.60027	2.14734	1.87296	0	2.3407	2.07214	0	1.61783	2.0199	1.64634	1.92444	2.17045	1.63385	1.94092	1.6732	0	1.07249	1.72624	1.75079	0	2.00766	0	1.63405	1.66256	1.96398	2.16777	5	0.219926	0.219926
chr4	1379759	1379870	chr4-1379759-DEL-112	chr4	1375001	1400000	0.390868	0	0	0	1.99435	0	0	1.57972	0	0	0	0	0	0	0	0	1.58454	0	0	0	1.60386	0	1.86204	0	0	0	0	21	0.446944	0.446944
chr4	1391670	1391744	chr4-1391670-DEL-75	chr4	1375001	1400000	0.390868	0	0	0	1.99435	0	0	1.57972	0	0	0	0	0	0	0	0	1.58454	0	0	0	1.60386	0	1.86204	0	0	0	0	21	0.397104	0.397104
chr4	1395011	1395165	chr4-1395011-DEL-155	chr4	1375001	1400000	0.390868	0	0	0	1.99435	0	0	1.57972	0	0	0	0	0	0	0	0	1.58454	0	0	0	1.60386	0	1.86204	0	0	0	0	21	0.443077	0.443077
chr4	1397626	1397985	chr4-1397626-DEL-360	chr4	1375001	1400000	0.390868	0	0	0	1.99435	0	0	1.57972	0	0	0	0	0	0	0	0	1.58454	0	0	0	1.60386	0	1.86204	0	0	0	0	21	0.534912	0.534912
chr4	1546056	1546522	chr4-1546056-DEL-467	chr4	1530001	1555000	0.967726	0	0.62549	0	0.792946	0.503352	0.441774	0.36488	0	0.528237	0.623601	0	0.294437	0.690773	0.849439	0	0.997374	0	0	0	0	0.491879	0.650762	0.395669	0	0	0	12	0.219926	0.219926
chr4	1672162	1672216	chr4-1672162-DEL-55	chr4	1660001	1685000	0.844957	1.24702	1.72543	0.966364	1.37716	1.5058	1.363	1.05759	1.17878	0.818588	1.22666	1.22567	1.12738	1.61094	1.73625	1.38834	1.28197	1.23569	1.26609	1.02308	1.62692	0.420614	1.01881	1.60194	1.02025	1.42135	1.41725	0	0.219926	0.219926
chr4	1829042	1829221	chr4-1829042-DEL-180	chr4	1810001	1835000	0.608908	1.44023	1.0179	0.733974	1.69028	1.4611	0.924072	0.411859	1.29067	1.22634	1.15126	0.904239	1.42676	1.5906	1.16362	1.31097	1.39438	1.14204	0.914038	1.01365	1.02207	1.27641	1.00241	1.46482	1.10594	1.08922	1.37537	0	0.959818	0.959818
chr4	3341308	3341375	chr4-3341308-DEL-68	chr4	3325001	3350000	0.576948	1.4623	0	1.30278	1.38401	1.11875	1.05892	0	1.01021	0.987675	1.40525	0	0.834073	0	1.21734	1.72877	1.15954	0	1.13491	1.16779	0.807365	1.46928	0.756672	1.26037	1.14692	1.01801	1.20934	5	0.744615	0.744615
chr4	3483081	3483168	chr4-3483081-DEL-88	chr4	3470001	3495000	0.406072	0	0.873099	0	1.10203	0.56486	0	0	0	0	0.953067	0.662403	0	0	0.879929	0	0	0.684929	0.146611	0	0.753219	1.15702	0.782194	0	0.914427	0	0.87696	13	0.0369231	0.0369231
chr4	3490077	3490217	chr4-3490077-DEL-141	chr4	3470001	3495000	0.406072	0	0.873099	0	1.10203	0.56486	0	0	0	0	0.953067	0.662403	0	0	0.879929	0	0	0.684929	0.146611	0	0.753219	1.15702	0.782194	0	0.914427	0	0.87696	13	0.622736	0.622736
chr4	3892794	4159897	chr4-3892794-DEL-267104	chr4	3870001	3895000	0.432247	0.865029	1.06252	0	0	0.705655	0.480276	0	0.712328	1.11958	0.826139	0.678532	0.590298	0	0	0.727823	0	0.741077	0.503038	0.479437	0.387634	0	0.809467	0.895969	0	0	0.662996	9	0.656457	0.882274
chr4	3892794	4159897	chr4-3892794-DEL-267104	chr4	3945001	3970000	0.745272	1.03254	1.66747	0	1.19619	1.36554	0	1.81323	2.0071	1.81441	1.68471	1.58518	1.54327	1.2827	2.20707	0	0	0	1.75496	1.96934	1.01489	0	0	2.75856	1.75373	0	2.03105	8	0.882274	0.882274
chr4	3892794	4159897	chr4-3892794-DEL-267104	chr4	4095001	4120000	0.688474	1.23135	2.08093	0.852222	0	1.09893	1.29655	1.86742	1.14003	0.796448	0.778184	0	1.1053	0.738123	0.922325	1.19515	0.588086	0	1.00741	1.19073	0	0.916427	0.90913	1.34481	0.839266	0.842283	0	5	0.218529	0.655588
chr4	6353776	6353874	chr4-6353776-DEL-99	chr4	6330001	6355000	0.796495	1.58367	1.28882	1.82853	1.28369	1.83469	1.58594	1.56898	1.64799	1.60102	1.32664	1.51665	1.37963	1.68308	1.15893	1.63468	1.58841	1.52299	1.31607	1.65782	1.47776	1.55406	1.7265	2.43135	1.91908	1.96807	1.49324	0	0.0769231	0.0769231
chr4	6649863	6651183	chr4-6649863-DEL-1321	chr4	6625001	6650000	0.368376	0.430175	0	0.309093	0.292539	0.275891	0	0.50045	0.172439	0	0.439706	0	0.634719	0.205235	0.527372	0.459664	0	0	0.429119	0	0.376698	0.847499	0	0.465047	0.11081	0	0	10	1	1
chr4	6879815	6879877	chr4-6879815-DEL-63	chr4	6865001	6890000	0.897578	1.79581	1.42015	1.91809	1.59256	1.68927	0	0	2.00398	2.03885	1.40149	0	1.38086	1.83138	1.60796	2.09927	0	1.59076	1.33222	1.76641	1.41186	2.22322	1.45744	1.43158	1.85235	1.657	0	5	1	1
chr4	6879954	6880012	chr4-6879954-DEL-59	chr4	6865001	6890000	0.897578	1.79581	1.42015	1.91809	1.59256	1.68927	0	0	2.00398	2.03885	1.40149	0	1.38086	1.83138	1.60796	2.09927	0	1.59076	1.33222	1.76641	1.41186	2.22322	1.45744	1.43158	1.85235	1.657	0	5	0.312319	0.312319
chr4	6880257	6880317	chr4-6880257-DEL-61	chr4	6865001	6890000	0.897578	1.79581	1.42015	1.91809	1.59256	1.68927	0	0	2.00398	2.03885	1.40149	0	1.38086	1.83138	1.60796	2.09927	0	1.59076	1.33222	1.76641	1.41186	2.22322	1.45744	1.43158	1.85235	1.657	0	5	0.791615	0.791615
chr4	7336419	7336642	chr4-7336419-DEL-224	chr4	7325001	7350000	0.183647	0.47337	0.341853	0.475615	0.402478	0.488942	0.262173	0.352017	0.318453	0.669498	0.310106	0.15138	0.508777	0.40045	0.67448	0.593277	0.541973	0	0	0.364275	0	0	0.345455	0.895424	0.552951	0.351893	0.48278	4	0.106683	0.188246
chr4	7336419	7336642	chr4-7336419-DEL-224	chr4	7330001	7355000	0.183647	0	0.341853	0	0.402478	0	0.262173	0.352017	0	0	0.310106	0.15138	0.508777	0.40045	0.67448	0	0.541973	0	0.0821479	0.364275	0	0	0	0.895424	0	0.351893	0.48278	11	0.188246	0.188246
chr4	7741565	7741636	chr4-7741565-DEL-72	chr4	7730001	7755000	0.392092	0	0	0.879269	0.961985	0.629346	0	0.526269	0.446934	0	0	1.29617	0.412794	0	0	0	0	0	0.985308	0	1.04619	0	0	1.11678	0	0	0	16	1	1
chr4	7748678	7748743	chr4-7748678-DEL-66	chr4	7730001	7755000	0.392092	0	0	0.879269	0.961985	0.629346	0	0.526269	0.446934	0	0	1.29617	0.412794	0	0	0	0	0	0.985308	0	1.04619	0	0	1.11678	0	0	0	16	0.128523	0.128523
chr4	7994068	7995166	chr4-7994068-DEL-1099	chr4	7985001	8010000	0.380725	0.815538	0	1.23357	0.51213	0.87383	0.686581	0	1.07687	0	0.373918	1.32107	0.507495	0.866391	1.1921	1.25736	1.30296	0.732656	0.769133	0.868947	1.04034	1.19221	0.799797	1.09186	1.51642	0	0.893869	4	0.919734	0.919734
chr4	9758867	9758948	chr4-9758867-DEL-82	chr4	9745001	9770000	0.293701	0	0	0	0.433695	0	0	0.784022	0.457944	0	0	0.398408	0	0	0	0	0.484732	0	0.398675	0	0.280769	0.617675	0.568562	0	0.686198	0	0.669625	15	0.97937	0.97937
chr4	10134484	10134653	chr4-10134484-DEL-170	chr4	10110001	10135000	0.213689	0.784274	0	0	0	0	0.573099	0	0	0	0	0	0	0	1.08227	0	1.07672	0	0	0	0	0	0	1.0725	0	0	0	21	0.409486	0.409486
chr4	10134484	10134755	chr4-10134484-DEL-272	chr4	10110001	10135000	0.213689	0.784274	0	0	0	0	0.573099	0	0	0	0	0	0	0	1.08227	0	1.07672	0	0	0	0	0	0	1.0725	0	0	0	21	0.387456	0.387456
chr4	14204701	14204776	chr4-14204701-DEL-76	chr4	14190001	14215000	0.348975	0	0.475057	0.582487	0.458521	0	0.299181	0.23286	0.48059	0	0.371166	0	0.475735	0	0	0.483966	0.506534	0.232035	0.569422	0.43216	0.464391	0.559825	0.303154	0	0.527449	0	0	9	0.144784	0.144784
chr4	25239428	25239568	chr4-25239428-DEL-141	chr4	25225001	25250000	0.602631	0.770702	0.637192	0.766447	0	0.669753	0.542404	0.436303	0.499252	0.617919	0.721696	0.755427	0.411896	0.728707	0.843798	0.593687	0.665187	0.521633	0.726125	0.585039	0.457614	0.725701	0.494224	0.655053	0.392041	0.635693	0.516458	1	0.138869	0.138869
chr4	37585303	37585563	chr4-37585303-DEL-261	chr4	37570001	37595000	0.690866	1.35599	1.55487	1.40756	1.51647	1.42083	1.43949	1.40621	1.68191	1.47778	1.15394	1.47627	1.41406	1.53217	1.4158	1.5774	1.27505	1.49304	1.28831	1.50437	1.44953	1.62853	1.47805	1.67246	1.3863	1.24127	1.66054	0	0.646084	0.646084
chr4	37883839	37884018	chr4-37883839-DEL-180	chr4	37880001	37905000	0.351454	1.10545	0.56302	0.596671	0.300426	0.754461	0.343796	0.560862	0.753383	0.536577	0.352858	0.600356	0.409653	0.740901	0.442368	0	0.580001	0	0.291974	0.893559	0.523748	0.652711	0	0.743916	0.546278	0.37041	0.887137	3	0.181451	0.181451
chr4	37883839	37883910	chr4-37883839-DEL-72	chr4	37880001	37905000	0.351454	1.10545	0.56302	0.596671	0.300426	0.754461	0.343796	0.560862	0.753383	0.536577	0.352858	0.600356	0.409653	0.740901	0.442368	0	0.580001	0	0.291974	0.893559	0.523748	0.652711	0	0.743916	0.546278	0.37041	0.887137	3	0.391367	0.391367
chr4	38880091	38880145	chr4-38880091-DEL-55	chr4	38860001	38885000	1.20179	2.18031	2.15607	1.99492	2.13908	2.03713	1.94988	1.49213	1.71116	0	0	2.04472	1.94621	1.92534	2.15058	1.61669	1.9673	1.77989	1.95688	2.01729	1.9289	1.98136	1.92595	2.2008	2.08521	2.03886	2.20048	2	0.551193	0.659889
chr4	38880091	38880145	chr4-38880091-DEL-55	chr4	38870001	38895000	1.20179	2.18031	2.15607	1.99492	2.13908	2.03713	1.94988	1.49213	1.71116	1.94245	1.73992	2.04472	1.94621	1.92534	2.15058	1.61669	1.9673	1.77989	1.95688	2.01729	1.9289	1.98136	1.92595	2.2008	2.08521	2.03886	2.20048	0	0.659889	0.659889
chr4	38880091	38880145	chr4-38880091-DEL-55	chr4	38875001	38900000	1.20179	2.18031	2.15607	1.99492	2.13908	2.03713	1.94988	1.49213	1.71116	1.94245	1.73992	2.04472	1.94621	1.92534	2.15058	1.61669	1.9673	1.77989	1.95688	2.01729	1.9289	1.98136	1.92595	2.2008	2.08521	2.03886	2.20048	0	0.659889	0.659889
chr4	40982195	40982245	chr4-40982195-DEL-51	chr4	40965001	40990000	0.500804	0	0	0.746155	0.617041	0.833499	0.761991	0	0	0	0	0.643204	0.848449	0.656231	0	1.11372	0.843751	1.2401	0	0.583318	0	0.977204	0.438697	1.22652	0.650443	0	1.21963	10	0.426265	0.426265
chr4	42760661	42767525	chr4-42760661-DEL-6865	chr4	42755001	42780000	0.179564	0	0	0	0	0	0	0.15898	0	0	0.277093	0	0	0	0	0	0.30263	0	0	0.543591	0	0	0.360572	0	0.576963	0.579358	0	19	0.159796	0.159796
chr4	42760661	42767525	chr4-42760661-DEL-6865	chr4	42760001	42785000	0.179564	0.277353	0	0	0	0	0	0.15898	0	0	0.277093	0	0	0	0	0	0	0.362133	0	0.543591	0	0.362819	0.360572	0.660321	0	0.579358	0	17	0.0463539	0.0927078
chr4	43749789	43750093	chr4-43749789-DEL-305	chr4	43725001	43750000	0.197411	0.377182	0.288394	0.144669	0	0.476028	0	0.334885	0.202001	0	0.163366	0	0.804335	0	0	0	0.434152	0	0.726504	0.301605	0.556684	0	0.51253	0.538566	0.339508	0	0.34624	10	0.347446	0.347446
chr4	47123508	47123578	chr4-47123508-DEL-71	chr4	47115001	47140000	0.295657	0.500139	0	0.2507	0.373577	0.246492	0.540528	0.643559	0	0.433413	0	0.407308	0.480391	0.397039	0.0889203	0.463085	0.671759	0.516029	0.285171	0	0.562009	0.623531	0	0.540553	0	0.477207	0.606344	6	0.409486	0.409486
chr4	47923200	47923249	chr4-47923200-DEL-50	chr4	47915001	47940000	0.832018	1.11444	1.14323	0.868846	1.23664	1.58507	1.22482	1.32355	0.949669	1.05529	1.41698	1.21281	0.969291	0	1.21845	1.32199	1.40793	1.20399	1.47008	1.17081	1.45565	1.61185	0.89406	1.26158	0.828786	1.34137	1.59672	1	0.461538	0.461538
chr4	48120165	48120226	chr4-48120165-DEL-62	chr4	48105001	48130000	0.809075	1.44255	1.49456	1.64883	2.01989	1.48959	1.70352	1.27961	1.7462	1.5187	1.66248	1.77303	1.40758	1.43773	1.61162	1.63382	1.83397	1.6857	1.48034	1.53764	1.81819	1.97754	1.53088	1.60162	1.698	1.72869	1.69228	0	0.596695	0.596695
chr4	56057800	56057996	chr4-56057800-DEL-197	chr4	56045001	56070000	0.374808	0.951751	0.773949	0.657938	0.908037	0.883976	0.767124	0.61582	0.780357	1.1666	0.808033	0.609763	0.893658	0.863082	0.672936	0.642088	1.24948	0.894772	0.810766	0.79905	0.505371	0.982297	0.72232	0.828152	0.75697	0.812627	0.800399	0	0.736605	0.736605
chr4	68508039	68625351	chr4-68508039-DEL-117313	chr4	68485001	68510000	1.1265	2.23912	2.39882	2.14887	2.21792	1.17352	2.02719	1.50008	0	1.56838	1.81042	1.46368	1.47143	2.05155	1.73922	1.48641	2.40019	1.48717	0	2.31249	0	2.05802	0	1.85742	1.51782	1.96441	2.26469	4	0.522457	0.522457
chr4	70516303	70516405	chr4-70516303-DEL-103	chr4	70495001	70520000	0.24394	0.519331	0	0	0	0	0	0.582769	0.424121	0.543845	0	0	0.659852	0.311486	0	0	0	0.424729	0	0.690839	0.448166	0	0	0.648823	0	0	0	16	0.305054	0.305054
chr4	75187068	75187117	chr4-75187068-DEL-50	chr4	75165001	75190000	0.180412	0	0	0	0	0	0	0	0.184885	0	0	0	0.376812	0	0.484313	0	0	0	0	0	0	0.444653	0	0	0	0	0.290355	21	0.959358	0.959358
chr4	75626634	75626689	chr4-75626634-DEL-56	chr4	75615001	75640000	0.353387	0.610691	0.811432	0.622713	0.681219	0	0.58662	0.401244	0	0	0.575543	0	0	0.558051	0	0.37689	0.943753	0	0	0	0	0	0	0.551426	0	0.632287	0	14	0.821365	0.821365
chr4	76150171	76150279	chr4-76150171-DEL-109	chr4	76140001	76165000	0.392432	0.892047	0.834724	0.936213	0.750277	1.01518	0.34159	0.991362	0.904929	0.763475	0.924808	1.19036	0.816245	0.675236	0.886948	0.782867	1.19009	0.700683	1.58674	0.599545	0.934563	0.723847	0.772923	1.086	0.603961	0.55859	0.781033	0	0.560362	0.560362
chr4	79558551	79558634	chr4-79558551-DEL-84	chr4	79550001	79575000	0.212173	0.221982	0	0.311117	0.137034	0.238841	0.327273	0	0	0.202648	0.179803	0.300563	0.185072	0	0.555523	0	0.340363	0.434786	0.491739	0	0.404296	0.0876126	0.627336	0	0.350979	0	0	9	0.138127	0.138127
chr4	81851574	81851623	chr4-81851574-DEL-50	chr4	81835001	81860000	0.36159	0.876324	0.515029	0.420911	0.684353	0.765404	0.557074	0.370352	0.938954	0.938178	0.574974	0.325299	0.351092	0.743088	0.559006	0.510821	0.546938	0.591631	1.00684	0.564143	0.635369	0.829002	0.646466	0.838672	0	0.60457	0	2	0.56045	0.56045
chr4	82474356	82474676	chr4-82474356-DEL-321	chr4	82450001	82475000	0.798074	1.2897	1.30817	1.10414	1.60229	1.31497	1.37265	1.34259	1.39553	1.22161	1.27762	1.25416	1.22764	1.28935	1.4101	1.71689	1.57888	1.06092	1.29625	1.41293	0.971601	1.64056	1.53724	1.4996	1.6137	1.20337	1.0573	0	0.0161873	0.0161873
chr4	83100480	83100533	chr4-83100480-DEL-54	chr4	83090001	83115000	0.493226	0	0	0	0	0	0.696025	0	0	0	0	0	0	0	0	0	0	0	0	0	0	0	0	0	0	0	0	25	0.742446	0.742446
chr4	85475629	85475691	chr4-85475629-DEL-63	chr4	85460001	85485000	0.192892	0.476625	0.234225	0.276447	0.00751479	0.224896	0.445871	0.692645	0.107687	0.361591	0.159947	0.340159	0.420856	0.155956	0.554279	0.326182	0	0	0.359587	0	0	0	0	0	0	0.133705	0	9	0.312308	0.312308
chr4	85541132	85541452	chr4-85541132-DEL-321	chr4	85540001	85565000	0.193703	0.289802	0.244445	0.389223	0.201408	0	0	0	0.313123	0.165715	0.166152	0.232531	0	0.372127	0	0.458294	0.523051	0	0	0.218837	0	0	0	0	0.334838	0	0	13	0.340134	0.340134
chr4	87110986	87111317	chr4-87110986-DEL-332	chr4	87095001	87120000	0.837398	0	1.62956	0	0	1.7465	0	1.42787	1.50978	1.72599	0	0	1.50246	1.84321	1.39743	0	0	0	1.50317	1.99805	0	1.7619	0	1.5034	0	1.95806	0	13	0.538462	0.538462
chr4	87347092	87353146	chr4-87347092-DEL-6055	chr4	87330001	87355000	0.606939	1.48915	1.77565	1.16462	1.38827	1.06766	1.01716	1.02061	1.33475	1.8411	1.28766	1.41984	1.37024	1.45754	1.63591	1.17211	1.40222	1.34769	0.832007	1.38231	1.49158	1.06381	1.14076	1.61202	1.07885	1.31604	1.21995	0	0.0127717	0.0127717
chr4	87854484	87854800	chr4-87854484-DEL-317	chr4	87830001	87855000	0.356422	1.09008	0.906076	0	0.819794	1.25394	0.841518	1.05694	0.845186	1.04219	0.707631	0.708877	0.881185	0.899112	0	0.605145	1.23428	1.21034	1.0594	0.816874	0	1.30899	1.16519	0	0	0.754279	0.943401	5	0.51694	0.51694
chr4	88228845	88228907	chr4-88228845-DEL-63	chr4	88205001	88230000	0.66553	1.56123	1.18294	0.881875	1.07303	1.19642	1.1526	1.1931	0.842499	1.41942	1.26222	1.07803	1.0441	1.04408	1.14509	1.29395	1.15338	1.32209	0.946899	1.26354	1.07602	1.61175	1.18255	1.28785	1.44652	1.25248	1.64456	0	0.75263	0.75263
chr4	96374501	96374582	chr4-96374501-DEL-82	chr4	96355001	96380000	0.243721	0.321118	0.21401	0	0	0	0.308235	0.0714965	0.292124	0	0.23604	0.506683	0	0	0	0	0.523901	0	0	0	0.150324	0.370479	0	0.456477	0	0	0	15	0.25035	0.25035
chr4	99101893	99102226	chr4-99101893-DEL-334	chr4	99100001	99125000	0.696722	1.41887	1.46491	1.48313	1.44373	1.33091	1.12652	1.40282	1.78618	0	1.4389	1.54907	1.42406	1.14578	2.00455	1.48398	1.60634	1.50068	1.651	1.56795	1.25454	1.32783	1.26929	1.54485	1.47721	1.43693	1.53175	1	0.704615	0.704615
chr4	100371910	100371979	chr4-100371910-DEL-70	chr4	100360001	100385000	0.181898	0.357305	0.356701	0.176234	0	0.158115	0	0	0.467838	0	0	0.410377	0.15321	0	0.243215	0	0	0.267185	0	0.225178	0	0.269534	0	0	0.22891	0	0	14	0.850137	0.850137
chr4	101866630	101867194	chr4-101866630-DEL-565	chr4	101865001	101890000	0.221818	0.249614	0.661397	0	0.609712	0	0.364296	0.445658	0.552532	0	0.340029	0.66813	0.276597	0.320435	0.230347	0.424252	0	0.570283	0.269306	0	0	0.373538	0.433462	0.493877	0.603384	0	0.459857	7	0.335952	0.335952
chr4	102620123	102620225	chr4-102620123-DEL-103	chr4	102610001	102635000	0.607129	1.20143	1.61432	1.2244	1.46482	1.39862	1.34989	0.766821	1.24847	1.16613	1.19958	1.25945	1.22553	1.30778	0.762645	1.07205	1.0502	1.41439	1.1818	1.47353	1.36964	1.38598	1.1168	1.23701	1.37237	1.01021	1.56893	0	0.462387	0.462387
chr4	105313733	105313792	chr4-105313733-DEL-60	chr4	105290001	105315000	0.252667	0.128878	0.557743	0	0.66322	0	0.418342	0.281992	0.439958	0	0	0.500113	0.509382	0	0	0.357439	0.520368	0.576979	0.704154	0.450205	0.57165	0	0	0.223139	0.355922	0.324113	0	9	0.643563	0.643563
chr4	108186519	108186819	chr4-108186519-DEL-301	chr4	108175001	108200000	0.661847	1.28382	1.31654	1.79772	1.18839	1.58706	1.36185	1.15737	0.869694	1.35116	1.45394	0.651212	0.859723	0.811346	1.29199	1.42791	1.23137	1.16322	0.921886	1.39433	1.21138	1.50798	1.36458	1.60137	0.772761	1.09803	0.862316	0	0.506549	0.506549
chr4	108691841	108691896	chr4-108691841-DEL-56	chr4	108670001	108695000	0.317156	1.29609	0.775099	0.671947	0.843517	0.8525	0.602223	0.786479	0.921714	0.753641	0.910543	0.912721	0.706711	0.664365	1.13642	1.33663	0.217432	0.462838	0.545265	0.736319	0.527873	0.63176	0.736831	0.731526	0.802905	0.622158	0.503539	0	0.0131168	0.0131168
chr4	110595164	110595353	chr4-110595164-DEL-190	chr4	110585001	110610000	0.246238	0	0	0.345932	0	0	0	0	0	0	0.27429	0	0	0.399591	0.715505	0	0	0	0.573391	0.527994	0	0.38564	0	0.189628	0	0.277413	0	17	0.593846	0.593846
chr4	114586664	114589884	chr4-114586664-DEL-3221	chr4	114580001	114605000	0.203229	0	0	0	0	0	0	0	0	0	0	0.812112	0	0	0	0.33611	0	0	0.323	0	0.170425	0.629798	0	0	0	0	0.408672	20	0.651177	0.651177
chr4	114589948	114592708	chr4-114589948-DEL-2761	chr4	114580001	114605000	0.203229	0	0	0	0	0	0	0	0	0	0	0.812112	0	0	0	0.33611	0	0	0.323	0	0.170425	0.629798	0	0	0	0	0.408672	20	0.651177	0.651177
chr4	116330323	116330639	chr4-116330323-DEL-317	chr4	116330001	116355000	0.222699	0.362961	0	0.241845	0.530316	0	0	0.387012	0	0.428086	0.648626	0	0.515281	0.442208	0.171921	0.808535	0.843197	0.216867	0	0.546071	0	1.41219	0.926498	0.849497	1.2094	0	0	9	0.156923	0.156923
chr4	119434855	119434933	chr4-119434855-DEL-79	chr4	119430001	119455000	0.402487	1.11609	0	0	0	0.355925	0	1.93994	1.35025	0	2.23702	0	0	0.823329	0	1.29737	1.9064	0	0.509858	0	0	0	0.957403	0	1.31165	0.348663	0.938539	13	0.373883	0.373883
chr4	120165933	120166137	chr4-120165933-DEL-205	chr4	120145001	120170000	0.227232	0	0	0.161225	0	0.485203	0	0.424195	0.23149	0	0.276728	0.403986	0.355003	0.427103	0	0	0.328307	0.288108	0.345422	0.55996	0.580364	0.468417	0.454292	0	0	0	0.44927	10	0.42903	0.42903
chr4	121313557	121313702	chr4-121313557-DEL-146	chr4	121310001	121335000	0.477114	1.02887	0.77136	0	0.85329	0.698892	0	1.08308	0.836667	0.731898	0.707531	0.830012	0.944562	0.836786	0.833037	0	0.766154	0.725865	0.784148	0.748458	0.618097	0.987084	1.09746	1.29052	0	0.783997	0.855675	4	0.335952	0.335952
chr4	122716688	122716737	chr4-122716688-DEL-50	chr4	122715001	122740000	0.650959	1.13889	1.16141	1.34025	1.57667	1.49874	0.913996	1.33341	1.19913	1.19137	1.26125	1.50508	1.34878	1.29032	1.1722	1.53265	1.40446	0	1.05718	1.53307	1.21899	1.40722	1.50786	1.19539	1.33581	0.903011	1.52344	1	0.426265	0.426265
chr4	129669766	129670056	chr4-129669766-DEL-291	chr4	129645001	129670000	0.228361	0.109624	0.274128	0.283918	0	0.395705	0	0.350381	0.37949	0.155293	0.423534	0.469625	0.589317	0.319254	0.599584	0.329544	0.0940161	0	0	0	0	0.419251	0.403448	0.146764	0.578555	0.404034	0.607573	6	0.929236	0.929236
chr4	141309625	141311908	chr4-141309625-DEL-2284	chr4	141295001	141320000	0.443043	0.343295	0.369874	0	0.453221	0.466037	0.151294	0.268438	0.570576	0.575472	0.52184	0.509829	0.370545	0	0.613935	0.768194	0.851575	0.758153	0	0.495562	0.369951	0.282542	0.539376	0.553443	0.673593	0.448163	0.448696	3	0.181451	0.181451
chr4	142108391	142108447	chr4-142108391-DEL-57	chr4	142100001	142125000	0.245861	0.51519	0.47226	0.343201	0.526459	0.490368	0	0	0.555388	0.598343	0.392843	0	0.53844	0.904124	0.569618	0	0.649883	0.562204	0	0.394927	0	0.953594	0.766684	1.15009	0	0.433421	0	8	0.874078	0.874078
chr4	146999439	146999751	chr4-146999439-DEL-313	chr4	146995001	147020000	0.351654	0	0	0.436565	0.861723	0	0	0	0	0	0	0.613936	0.561224	0.605422	0	0.655514	0.532964	0	0	0.570203	0.630739	0	0	0.753737	0	0.567729	0	15	0.286858	0.286858
chr4	154634590	154634643	chr4-154634590-DEL-54	chr4	154630001	154655000	0.858815	1.75528	1.8257	1.51704	1.59455	1.94789	1.36748	1.46167	1.49851	1.52556	1.84157	1.32718	1.26373	1.80334	1.49879	1.68979	1.54781	1.8089	1.51107	1.58541	1.32569	1.48221	1.46016	1.54921	1.55414	1.41425	1.93995	0	0.287174	0.287174
chr4	158257033	158257176	chr4-158257033-DEL-144	chr4	158250001	158275000	0.524948	0.621011	0.71892	0.734667	0.704343	0.993457	1.01441	0.924713	0.554135	1.64475	0.627828	1.04823	0.502533	0.633475	0.515447	1.25846	0.311398	0.643374	0.901072	0.728127	0.96816	1.35209	0.664091	0.976945	2.15396	0.807797	0.911252	0	0.38969	0.38969
chr4	158257130	158257212	chr4-158257130-DEL-83	chr4	158250001	158275000	0.524948	0.621011	0.71892	0.734667	0.704343	0.993457	1.01441	0.924713	0.554135	1.64475	0.627828	1.04823	0.502533	0.633475	0.515447	1.25846	0.311398	0.643374	0.901072	0.728127	0.96816	1.35209	0.664091	0.976945	2.15396	0.807797	0.911252	0	0.38969	0.38969
chr4	159094716	159094847	chr4-159094716-DEL-132	chr4	159090001	159115000	0.505682	0.521097	0.637928	0.626957	0.712236	0.743658	0.514829	0.380249	0.652079	0.316769	0.613279	0.395291	0.565022	0.510748	0.375836	0.949808	0	0.489762	0.323653	0.53294	0.403731	0.496498	0.628966	0.935805	0	0.712261	0.834443	2	0.373883	0.373883
chr4	162472852	162475268	chr4-162472852-DEL-2417	chr4	162475001	162500000	0.325864	0.662556	0.540859	0.823909	0	0.637936	0.796535	0.979906	0.299981	0.834208	0.813181	0	0.711741	0.876275	0.976109	0.597466	0.990468	0.573107	0.569062	0.964095	0.81682	0.976574	0.632272	2.00993	0.317876	0.585723	0.726977	2	0.704507	0.704507
chr4	168155445	168155532	chr4-168155445-DEL-88	chr4	168150001	168175000	0.511988	1.17713	1.00804	0.955524	0.86844	1.18736	1.32107	1.0448	1.24284	1.12562	0.757907	0.925989	1.1677	1.01754	1.18823	1.01444	0.919793	0.900372	1.0659	1.13282	0.733737	1.25695	0.854255	0.800324	1.05036	1.17217	1.35552	0	0.656457	0.656457
chr4	168155728	168155969	chr4-168155728-DEL-242	chr4	168150001	168175000	0.511988	1.17713	1.00804	0.955524	0.86844	1.18736	1.32107	1.0448	1.24284	1.12562	0.757907	0.925989	1.1677	1.01754	1.18823	1.01444	0.919793	0.900372	1.0659	1.13282	0.733737	1.25695	0.854255	0.800324	1.05036	1.17217	1.35552	0	1	1
chr4	168155849	168155937	chr4-168155849-DEL-89	chr4	168150001	168175000	0.511988	1.17713	1.00804	0.955524	0.86844	1.18736	1.32107	1.0448	1.24284	1.12562	0.757907	0.925989	1.1677	1.01754	1.18823	1.01444	0.919793	0.900372	1.0659	1.13282	0.733737	1.25695	0.854255	0.800324	1.05036	1.17217	1.35552	0	0.279225	0.279225
chr4	169783433	169783507	chr4-169783433-DEL-75	chr4	169780001	169805000	0.696643	1.15417	0	0	0	1.43025	1.22697	0	1.08875	0	0	0	1.1268	1.27584	0.986481	1.28264	1.45331	0.96004	0	1.31573	1.05631	0	1.11862	0	1.43281	1.14644	1.4506	10	0.461538	0.461538
chr4	174224843	174224914	chr4-174224843-DEL-72	chr4	174200001	174225000	0.61121	1.5463	1.42053	1.15309	1.5417	1.02688	1.18848	1.59495	1.32613	1.37211	1.12547	1.08273	1.48441	1.33524	1.10389	1.26436	1.02971	1.53799	1.43919	0.746306	1.36127	1.49633	0.9907	1.79546	0.969608	1.14516	1.23636	0	0.490953	0.490953
chr4	183734665	183737816	chr4-183734665-DEL-3152	chr4	183715001	183740000	0.541237	1.17201	1.27937	0.828556	1.15418	1.2885	1.11718	0.874403	0.957377	1.12508	0.793288	0.887304	0.942002	1.11581	0.743067	0.719258	1.24623	1.17832	0.933419	1.09488	0.680864	0.785011	0.997912	1.21332	1.12156	0.876148	1.35632	0	0.791615	0.791615
chr4	184257347	184257410	chr4-184257347-DEL-64	chr4	184240001	184265000	1.27691	2.58654	2.41714	2.52754	1.71616	2.46036	2.16818	2.61767	2.44479	2.32505	2.3441	2.28709	1.97606	2.32266	2.49002	2.8028	2.69728	2.12594	2.05276	2.43677	2.13332	2.26852	2.19646	2.42612	2.30586	2.16871	2.54252	0	0.138869	0.138869
chr4	186034373	186034462	chr4-186034373-DEL-90	chr4	186025001	186050000	0.634523	1.24427	1.19529	1.12338	1.33725	1.30468	1.28177	1.23852	1.03722	1.45151	0.854216	1.09255	1.40795	1.00983	0	1.23043	1.20666	1.33016	1.12717	1.25359	0.75338	1.316	1.3839	1.05015	1.25532	1.08154	1.33937	1	0.367011	0.367011
chr4	186042960	186043091	chr4-186042960-DEL-132	chr4	186025001	186050000	0.634523	1.24427	1.19529	1.12338	1.33725	1.30468	1.28177	1.23852	1.03722	1.45151	0.854216	1.09255	1.40795	1.00983	0	1.23043	1.20666	1.33016	1.12717	1.25359	0.75338	1.316	1.3839	1.05015	1.25532	1.08154	1.33937	1	0.148119	0.148119
chr4	186929558	186929691	chr4-186929558-DEL-134	chr4	186925001	186950000	0.234306	0	0	0.452	0.00675974	0	0	0.644185	0	0.402821	0.290407	0	0	0	0	0.405898	0.319439	0.612433	0.374105	0	0	0	0	0.188805	0	0	0.404605	15	0.526711	0.526711
chr4	186959315	186959373	chr4-186959315-DEL-59	chr4	186935001	186960000	0.234306	0	0	0.452	0	0	0	0.644185	0	0.402821	0.290407	0	0	0	0	0.405898	0.319439	0.612433	0	0	0	0	0	0.188805	0	0	0.404605	17	0.0868905	0.0868905
chr4	186959370	186960363	chr4-186959370-DEL-994	chr4	186935001	186960000	0.234306	0	0	0.452	0	0	0	0.644185	0	0.402821	0.290407	0	0	0	0	0.405898	0.319439	0.612433	0	0	0	0	0	0.188805	0	0	0.404605	17	0.181451	0.181451
chr4	186959400	186961974	chr4-186959400-DEL-2575	chr4	186935001	186960000	0.234306	0	0	0.452	0	0	0	0.644185	0	0.402821	0.290407	0	0	0	0	0.405898	0.319439	0.612433	0	0	0	0	0	0.188805	0	0	0.404605	17	0.0868905	0.0868905
chr4	188505254	188505314	chr4-188505254-DEL-61	chr4	188490001	188515000	0.224381	0.352014	0.36891	0	0.283346	0	0	0	0.565882	0	0	0.459175	0	0	0	0.332508	0.37753	0.287747	0.663456	0	0	0.311774	0.422449	0.323334	0.333141	0.300325	0.408883	11	0.915864	0.915864
chr4	189233138	189233886	chr4-189233138-DEL-749	chr4	189225001	189250000	0.221297	0.305218	0	0.717057	0.231638	0.16911	0.423028	0.223983	1.31231	0.680188	1.19296	0.423416	0.330787	0.433433	0	0.58841	0.711	1.19129	0.139747	0.695814	0.602046	0.296901	0.45983	0.708597	0	0.437607	0.233863	3	0.211556	0.211556
chr4	189234335	189234674	chr4-189234335-DEL-340	chr4	189225001	189250000	0.221297	0.305218	0	0.717057	0.231638	0.16911	0.423028	0.223983	1.31231	0.680188	1.19296	0.423416	0.330787	0.433433	0	0.58841	0.711	1.19129	0.139747	0.695814	0.602046	0.296901	0.45983	0.708597	0	0.437607	0.233863	3	0.443029	0.443029
chr5	80842	81012	chr5-80842-DEL-171	chr5	75001	100000	1.79513	0	0	0	0	0	0	0.370239	0	0	0	0	0	0	0	0.776598	0	0	0	0.393717	0	0.764446	0.236182	0	0	0	0	21	0.832626	0.832626
chr5	83245	83994	chr5-83245-DEL-750	chr5	75001	100000	1.79513	0	0	0	0	0	0	0.370239	0	0	0	0	0	0	0	0.776598	0	0	0	0.393717	0	0.764446	0.236182	0	0	0	0	21	0.959358	0.959358
chr5	83282	83431	chr5-83282-DEL-150	chr5	75001	100000	1.79513	0	0	0	0	0	0	0.370239	0	0	0	0	0	0	0	0.776598	0	0	0	0.393717	0	0.764446	0.236182	0	0	0	0	21	0.446944	0.446944
chr5	84755	85204	chr5-84755-DEL-450	chr5	75001	100000	1.79513	0	0	0	0	0	0	0.370239	0	0	0	0	0	0	0	0.776598	0	0	0	0.393717	0	0.764446	0.236182	0	0	0	0	21	0.959358	0.959358
chr5	165986	166181	chr5-165986-DEL-196	chr5	165001	190000	0.389763	1.31733	0.918401	0.761891	1.0335	0.631427	1.34017	0.68103	0.965369	1.24779	0.805248	0.833228	0.770065	1.32844	1.36384	1.15619	0.944661	1.16286	0	0.699819	1.10722	1.03516	0.783008	0.721033	0.500461	0.742249	0.345898	1	0.193151	0.193151
chr5	175673	175732	chr5-175673-DEL-60	chr5	165001	190000	0.389763	1.31733	0.918401	0.761891	1.0335	0.631427	1.34017	0.68103	0.965369	1.24779	0.805248	0.833228	0.770065	1.32844	1.36384	1.15619	0.944661	1.16286	0	0.699819	1.10722	1.03516	0.783008	0.721033	0.500461	0.742249	0.345898	1	0.607358	0.607358
chr5	176047	176273	chr5-176047-DEL-227	chr5	165001	190000	0.389763	1.31733	0.918401	0.761891	1.0335	0.631427	1.34017	0.68103	0.965369	1.24779	0.805248	0.833228	0.770065	1.32844	1.36384	1.15619	0.944661	1.16286	0	0.699819	1.10722	1.03516	0.783008	0.721033	0.500461	0.742249	0.345898	1	0.838443	0.838443
chr5	302310	302404	chr5-302310-DEL-95	chr5	300001	325000	0.669031	0	1.9043	1.90115	1.41893	0	1.88056	1.60242	1.54879	1.41817	1.39805	1.83982	0	0	1.66082	0	2.20722	0	1.54421	0	1.14184	1.67682	1.85285	0	1.83457	1.77648	1.70995	8	0.0913043	0.0913043
chr5	467489	467580	chr5-467489-DEL-92	chr5	460001	485000	0.684051	0	1.10055	1.76069	1.36563	0	1.39327	1.55324	0	1.62306	1.3771	1.41398	0	1.33772	1.64065	0	1.31887	1.75945	0	0	1.80707	0	0	1.43665	0.930126	0	1.15715	10	0.659889	0.659889
chr5	467607	468296	chr5-467607-DEL-690	chr5	460001	485000	0.684051	0	1.10055	1.76069	1.36563	0	1.39327	1.55324	0	1.62306	1.3771	1.41398	0	1.33772	1.64065	0	1.31887	1.75945	0	0	1.80707	0	0	1.43665	0.930126	0	1.15715	10	0.153846	0.153846
chr5	468021	468204	chr5-468021-DEL-184	chr5	460001	485000	0.684051	0	1.10055	1.76069	1.36563	0	1.39327	1.55324	0	1.62306	1.3771	1.41398	0	1.33772	1.64065	0	1.31887	1.75945	0	0	1.80707	0	0	1.43665	0.930126	0	1.15715	10	0.724146	0.724146
chr5	474325	474795	chr5-474325-DEL-471	chr5	460001	485000	0.684051	0	1.10055	1.76069	1.36563	0	1.39327	1.55324	0	1.62306	1.3771	1.41398	0	1.33772	1.64065	0	1.31887	1.75945	0	0	1.80707	0	0	1.43665	0.930126	0	1.15715	10	0.212499	0.212499
chr5	474625	474795	chr5-474625-DEL-171	chr5	460001	485000	0.684051	0	1.10055	1.76069	1.36563	0	1.39327	1.55324	0	1.62306	1.3771	1.41398	0	1.33772	1.64065	0	1.31887	1.75945	0	0	1.80707	0	0	1.43665	0.930126	0	1.15715	10	0.159985	0.159985
chr5	608767	608816	chr5-608767-DEL-50	chr5	600001	625000	0.228275	0	0	0	0	0	0	0	0	0	0.440793	0	0	0	0	0	0	0.490575	0	0	0	1.01645	0	0	0	0	0	23	0.910143	0.910143
chr5	774709	774768	chr5-774709-DEL-60	chr5	755001	780000	0.250475	1.15088	0	0	0	0	0	0	0	1.69438	0	0	2.04278	0	0	0.986514	0.263511	0	0	0	0.59698	0	0.463742	0	0	0	1.11711	18	0.705138	0.705138
chr5	841329	841400	chr5-841329-DEL-72	chr5	835001	860000	0.36918	0	0.842685	0.689309	1.28233	0	0	0.267361	0	0	0	0.891245	0	0.486568	0	0	0.595554	0.711229	0	0	0	0	0.535557	0	0.34398	0	0	16	0.330176	0.330176
chr5	1022502	1023980	chr5-1022502-DEL-1479	chr5	1015001	1040000	0.45379	0	0.334546	0.508576	0.201923	0.592911	0	0.514764	0.791697	0.626801	0.985456	0.479777	0.422238	0.685737	0.168454	1.35544	1.34368	0.738234	1.19704	0.492838	0.246134	0.941334	0.700745	0.902261	0.693803	0.881912	0.544818	2	0.461538	0.461538
chr5	1024922	1025413	chr5-1024922-DEL-492	chr5	1015001	1040000	0.45379	0	0.334546	0.508576	0.201923	0.592911	0	0.514764	0.791697	0.626801	0.985456	0.479777	0.422238	0.685737	0.168454	1.35544	1.34368	0.738234	1.19704	0.492838	0.246134	0.941334	0.700745	0.902261	0.693803	0.881912	0.544818	2	0.800618	0.800618
chr5	1025754	1026576	chr5-1025754-DEL-823	chr5	1015001	1040000	0.45379	0	0.334546	0.508576	0.201923	0.592911	0	0.514764	0.791697	0.626801	0.985456	0.479777	0.422238	0.685737	0.168454	1.35544	1.34368	0.738234	1.19704	0.492838	0.246134	0.941334	0.700745	0.902261	0.693803	0.881912	0.544818	2	0.275385	0.275385
chr5	1036947	1037070	chr5-1036947-DEL-124	chr5	1015001	1040000	0.45379	0	0.334546	0.508576	0.201923	0.592911	0	0.514764	0.791697	0.626801	0.985456	0.479777	0.422238	0.685737	0.168454	1.35544	1.34368	0.738234	1.19704	0.492838	0.246134	0.941334	0.700745	0.902261	0.693803	0.881912	0.544818	2	0.705138	0.705138
chr5	1039515	1039620	chr5-1039515-DEL-106	chr5	1015001	1040000	0.45379	0	0.334546	0.508576	0.201923	0.592911	0	0.514764	0.791697	0.626801	0.985456	0.479777	0.422238	0.685737	0.168454	1.35544	1.34368	0.738234	1.19704	0.492838	0.246134	0.941334	0.700745	0.902261	0.693803	0.881912	0.544818	2	0.610845	0.610845
chr5	1170488	1170694	chr5-1170488-DEL-207	chr5	1155001	1180000	0.48464	0.833596	0.878006	1.18153	1.01082	1.25396	1.19676	0.443244	1.28764	1.06456	0.819461	0.925723	1.05944	1.55468	0	1.20845	0.789824	0.842996	1.15843	0.823136	1.08172	0	0.514257	0.956658	1.3065	0.911866	1.14628	2	0.656457	0.656457
chr5	1178179	1180617	chr5-1178179-DEL-2439	chr5	1155001	1180000	0.48464	0.833596	0.878006	1.18153	1.01082	1.25396	1.19676	0.443244	1.28764	1.06456	0.819461	0.925723	1.05944	1.55468	0	1.20845	0.789824	0.842996	1.15843	0.823136	1.08172	0	0.514257	0.956658	1.3065	0.911866	1.14628	2	0.764841	0.764841
chr5	1459009	1459090	chr5-1459009-DEL-82	chr5	1455001	1480000	0.839767	1.64903	1.9808	1.24273	1.96955	1.50932	1.85876	1.07979	1.21383	1.76862	1.87759	1.34769	1.33987	1.47607	1.65292	1.40542	2.18487	1.48981	1.77273	1.39145	1.6344	1.57944	1.41024	1.17494	1.87735	1.07507	1.11945	0	0.540769	0.540769
chr5	1459383	1459488	chr5-1459383-DEL-106	chr5	1455001	1480000	0.839767	1.64903	1.9808	1.24273	1.96955	1.50932	1.85876	1.07979	1.21383	1.76862	1.87759	1.34769	1.33987	1.47607	1.65292	1.40542	2.18487	1.48981	1.77273	1.39145	1.6344	1.57944	1.41024	1.17494	1.87735	1.07507	1.11945	0	0.777714	0.777714
chr5	1475734	1475801	chr5-1475734-DEL-68	chr5	1455001	1480000	0.839767	1.64903	1.9808	1.24273	1.96955	1.50932	1.85876	1.07979	1.21383	1.76862	1.87759	1.34769	1.33987	1.47607	1.65292	1.40542	2.18487	1.48981	1.77273	1.39145	1.6344	1.57944	1.41024	1.17494	1.87735	1.07507	1.11945	0	0.134991	0.134991
chr5	6519769	6519818	chr5-6519769-DEL-50	chr5	6515001	6540000	0.224705	0	0	0	0	0	0	0	0	0	0	0	0	0	0	0	0	0	0	0	0	0	0	0	0	0.411858	0	25	0.721104	0.721104
chr5	10345672	10345796	chr5-10345672-DEL-125	chr5	10345001	10370000	0.452226	0.345969	0.977195	0	0.381945	1.11591	0	0	0	0.423552	0	0	0	0	0	0	0.281318	0	0	0	0	0	0	0	0	0	0	20	0.775995	0.775995
chr5	10346326	10346403	chr5-10346326-DEL-78	chr5	10345001	10370000	0.452226	0.345969	0.977195	0	0.381945	1.11591	0	0	0	0.423552	0	0	0	0	0	0	0.281318	0	0	0	0	0	0	0	0	0	0	20	0.835773	0.835773
chr5	10549090	10549235	chr5-10549090-DEL-146	chr5	10545001	10570000	0.590364	0.598436	0.561573	0.755732	0.984209	0.505885	0.686734	0.694496	0.776574	0.553327	0.763451	0.584075	0.526003	0.744528	1.19958	0.895038	0.659497	0.90026	0.54902	0.652382	0	0.632865	0.425798	1.03769	0.960046	0.979567	0.933321	1	0.972575	0.972575
chr5	10638939	10640085	chr5-10638939-DEL-1147	chr5	10625001	10650000	0.826982	1.16015	1.26429	0	1.08746	1.57856	0	1.40336	0	1.16814	1.31271	1.52258	1.15828	1.4147	0	1.43326	1.63454	1.21726	1.35305	1.32389	0	0.979525	0.385721	1.05845	0	0.887255	1.20087	6	0.443029	0.443029
chr5	10639289	10639350	chr5-10639289-DEL-62	chr5	10625001	10650000	0.826982	1.16015	1.26429	0	1.08746	1.57856	0	1.40336	0	1.16814	1.31271	1.52258	1.15828	1.4147	0	1.43326	1.63454	1.21726	1.35305	1.32389	0	0.979525	0.385721	1.05845	0	0.887255	1.20087	6	0.918261	0.918261
chr5	10639785	10639970	chr5-10639785-DEL-186	chr5	10625001	10650000	0.826982	1.16015	1.26429	0	1.08746	1.57856	0	1.40336	0	1.16814	1.31271	1.52258	1.15828	1.4147	0	1.43326	1.63454	1.21726	1.35305	1.32389	0	0.979525	0.385721	1.05845	0	0.887255	1.20087	6	0.918261	0.918261
chr5	13967695	13967815	chr5-13967695-DEL-121	chr5	13960001	13985000	0.605026	1.08549	1.07741	1.13451	0	1.35875	1.6763	1.3927	1.24468	1.4673	0.939487	1.09795	1.07834	1.19744	1.25893	1.57594	1.30841	1.25507	1.1484	1.43776	0.955773	1.33901	1.19048	1.29482	1.26369	1.12089	1.55469	1	0.462387	0.462387
chr5	29069211	29069423	chr5-29069211-DEL-213	chr5	29060001	29085000	0.22221	0.375345	0	0.400079	0.248365	0.258714	0	0	0.531729	0.511806	0	0.643292	0.423974	0	0	0	0.481852	0.427622	0	0.348412	0.530453	0.247688	0.209232	0.619984	0.400299	0	0.321651	9	0.324397	0.324397
chr5	31570381	31570436	chr5-31570381-DEL-56	chr5	31555001	31580000	0.458077	1.01866	1.31844	0.914246	1.29584	1.12287	1.03618	1.63675	0.957539	1.1059	1.02578	1.06112	0.845442	0.963757	0.599162	0.673265	1.12331	1.26582	1.16104	0.958826	1.10606	1.21446	0.989219	1.52397	0.873104	0.68121	1.25251	0	0.61387	0.61387
chr5	35191033	35191369	chr5-35191033-DEL-337	chr5	35180001	35205000	0.22306	0.572705	0.826109	1.0544	0.876547	0.966541	1.03467	0.784294	1.18061	1.49211	0	0.706612	1.05841	0.991161	0.589497	0.935723	0	1.03416	1.01141	1.05847	1.19028	0.970862	0.831233	0.447353	1.02051	0.649999	0	3	0.490953	0.490953
chr5	35196036	35196085	chr5-35196036-DEL-50	chr5	35180001	35205000	0.22306	0.572705	0.826109	1.0544	0.876547	0.966541	1.03467	0.784294	1.18061	1.49211	0	0.706612	1.05841	0.991161	0.589497	0.935723	0	1.03416	1.01141	1.05847	1.19028	0.970862	0.831233	0.447353	1.02051	0.649999	0	3	0.569474	0.569474
chr5	35614072	35614384	chr5-35614072-DEL-313	chr5	35605001	35630000	0.224663	0.255287	0.663064	0	0.5381	0	0.974776	0.56634	0.197649	0.624308	0	0.60505	0.188844	0.5597	0	0.608305	0	0.532268	0.450332	0	0.31955	0.239631	0.601289	0.423886	0.835741	0.319299	0.567921	6	1	1
chr5	37293698	37294028	chr5-37293698-DEL-331	chr5	37275001	37300000	0.28138	0	0	0	0	0.3689	0.283917	0	0	0.250359	0.252926	0	0	0.606175	0	0	0.439727	0	0	0	0	0	0	0.605115	0.0935568	0.385193	0.231154	16	0.462387	0.462387
chr5	44794892	44795468	chr5-44794892-DEL-577	chr5	44770001	44795000	0.462838	0.808465	1.35985	0.832503	0	0.899417	0.901844	1.35521	0.858173	1.12959	1.04808	0.977316	0.876082	0.882097	1.39247	1.02649	0.764561	0.842428	1.19134	0.932997	1.18816	1.0608	0.751889	0.975167	1.08189	0.743836	1.1812	1	0.338814	0.338814
chr5	54419268	54419329	chr5-54419268-DEL-62	chr5	54410001	54435000	0.246253	0.712198	0.620081	0.414162	0.499843	0.540601	0.691402	0.394006	0.289726	0.546752	0.555081	0.562159	0.730694	0	0.549945	0.808571	0.534319	0.66162	0.654735	0.475647	0	0.640489	0.333794	0.832565	0.925027	0.294539	0.52162	2	0.676923	0.676923
chr5	54513748	54513798	chr5-54513748-DEL-51	chr5	54500001	54525000	0.701754	1.09052	1.15394	1.00525	1.80377	1.30815	1.15494	1.24905	1.05575	1.34752	1.29993	1.62669	0.907547	0.916095	1.34939	1.4516	1.40803	1.40852	1.29697	0.993796	1.4822	1.95498	1.50849	1.42893	1.61068	1.27321	1.49738	0	0.431892	0.431892
chr5	55696271	55696495	chr5-55696271-DEL-225	chr5	55690001	55715000	0.609659	0.918228	0.685287	1.00952	1.38966	1.46591	1.13715	0.850669	1.50585	1.23532	0.963303	1.001	0.9945	1.14217	0.810795	1.22742	1.1766	1.19552	1.21396	1.51038	1.03972	1.65765	1.02465	1.39837	1.27667	1.1587	1.59204	0	0.237857	0.237857
chr5	60668137	60668256	chr5-60668137-DEL-120	chr5	60660001	60685000	0.625074	1.42769	1.94478	1.40248	1.48846	1.57352	1.32019	1.2774	1.18561	1.47039	1.44546	1.4268	1.07245	1.19758	0.531568	1.46895	1.4874	1.38699	1.51644	1.29922	0	1.81867	1.42265	1.32831	1.64828	1.22848	1.27594	1	0.578767	0.578767
chr5	65732257	65734553	chr5-65732257-DEL-2297	chr5	65715001	65740000	0.451887	1.01611	0.869523	0.668134	0.852896	0.995654	0.96463	0.826209	1.13023	1.00854	0.836625	1.10363	1.23919	1.23341	1.22356	1.36951	1.16878	1.01258	1.18405	0.864818	0.888906	1.26438	0.718018	0.61552	1.3439	1.1032	1.50778	0	0.457994	0.457994
chr5	66522268	66522569	chr5-66522268-DEL-302	chr5	66510001	66535000	0.226413	0	0	0.423048	0.250306	0	0	0	0	0.373938	0	0	0.607973	0	0.377147	0	0.464469	0.3444	0	0	0.480008	0	0	0	0.445193	0	0.42836	16	0.915864	0.915864
chr5	74503577	74503644	chr5-74503577-DEL-68	chr5	74480001	74505000	0.200942	0.261588	0.396661	0.540736	0.562543	0	0.207138	0.182072	0.573177	0	0	0.150191	0.277715	0	0	0.223548	0.239594	0.247202	0	0	0	0.587262	0	0	0.490119	0	0	12	0.347446	0.347446
chr5	76172130	76172207	chr5-76172130-DEL-78	chr5	76160001	76185000	0.292674	0.454753	0	0	0.536101	0.297093	0.40825	0.429673	0	0.410668	0.241715	0.161899	0.314264	0	0	0	0.435571	0.522043	0	0.486581	0.317883	1.02163	0.515249	0	1.04274	0	0.283319	9	1	1
chr5	76699600	76699795	chr5-76699600-DEL-196	chr5	76690001	76715000	0.321674	0	0	0.710031	0.445945	0.343862	0	0	0.305205	0	0	0	0	0	0	0.416624	0	0	0	0	0	0.8131	0	0	0	0	0	20	0.815935	0.815935
chr5	77794847	77795027	chr5-77794847-DEL-181	chr5	77770001	77795000	0.459086	0	0.520543	0.529103	0.534105	0.843256	1.07585	0.687133	0.736819	1.04676	0.642142	0.597613	0.901004	0.638849	1.14875	0.784819	0.808986	0.427954	0.612887	0.845791	0.471401	0.249781	0.559019	0.588465	0.761941	0.602288	0.504717	1	0.959818	0.959818
chr5	78980926	78981249	chr5-78980926-DEL-324	chr5	78975001	79000000	0.63495	0	0	0	2.17124	0	0	1.18883	0	1.68163	0	0	0	0	0	1.16268	0	0	0	0	1.43026	2.08485	0	1.51533	0	0	0	19	0.744615	0.744615
chr5	78981904	78982222	chr5-78981904-DEL-319	chr5	78975001	79000000	0.63495	0	0	0	2.17124	0	0	1.18883	0	1.68163	0	0	0	0	0	1.16268	0	0	0	0	1.43026	2.08485	0	1.51533	0	0	0	19	0.863946	0.863946
chr5	80301309	80301388	chr5-80301309-DEL-80	chr5	80300001	80325000	0.230882	0.712776	0.465744	1.00078	0.795374	0.484745	0.546534	0.786073	0.752243	0	0.74217	0.495506	0.531279	0.829018	0.7587	0.741391	0	0	0.762481	0.75595	0.764362	0	0.520095	0.806338	0.815887	0.589167	0.485757	4	0.641852	0.641852
chr5	80691949	80692020	chr5-80691949-DEL-72	chr5	80670001	80695000	0.619083	0.945699	1.0245	1.18886	1.18023	1.22284	0.77647	0.920195	1.04081	1.09024	1.34555	1.11022	1.34685	0.829466	1.20696	0.945795	0.962398	0.927057	1.12665	1.20345	0.795329	1.42329	1.17475	0	1.15667	0.913806	0.858337	1	0.273981	0.273981
chr5	80692357	80692424	chr5-80692357-DEL-68	chr5	80670001	80695000	0.619083	0.945699	1.0245	1.18886	1.18023	1.22284	0.77647	0.920195	1.04081	1.09024	1.34555	1.11022	1.34685	0.829466	1.20696	0.945795	0.962398	0.927057	1.12665	1.20345	0.795329	1.42329	1.17475	0	1.15667	0.913806	0.858337	1	0.869415	0.869415
chr5	99504186	99507200	chr5-99504186-DEL-3015	chr5	99500001	99525000	0.385868	0.996178	0	0	0	1.09448	0	0	0	0.495388	0	1.3237	0	1.12052	0	0	0.850802	0	0	0.701566	1.40786	0.907879	0	0.132433	0.719476	1.12784	0	14	0.462387	0.462387
chr5	99522465	99523283	chr5-99522465-DEL-819	chr5	99500001	99525000	0.385868	0.996178	0	0	0	1.09448	0	0	0	0.495388	0	1.3237	0	1.12052	0	0	0.850802	0	0	0.701566	1.40786	0.907879	0	0.132433	0.719476	1.12784	0	14	1	1
chr5	115633640	115634114	chr5-115633640-DEL-475	chr5	115625001	115650000	1.30948	1.85383	2.58451	2.12052	2.99426	2.32066	2.29298	2.00716	2.07376	1.97635	2.69543	2.24637	1.77229	2.63476	2.44889	2.1769	2.53411	2.22651	1.89005	2.0769	2.12313	2.4919	2.45782	2.44344	2.77016	2.33306	2.38403	0	0.0595956	0.0595956
chr5	116129459	116129676	chr5-116129459-DEL-218	chr5	116125001	116150000	0.256731	0	0.564176	0	0.478299	0	0.964485	0	0.388538	0	0	0	0	0	0.848624	0.972739	0	0	0	0	0	0.413446	0	1.32739	0.985999	0.325154	0	16	0.586471	0.586471
chr5	116558441	116558761	chr5-116558441-DEL-321	chr5	116555001	116580000	0.843237	1.35007	1.6235	1.0938	1.81461	1.22197	1.3601	1.48027	1.04437	1.70866	1.01969	1.23225	1.32382	1.26487	0.967141	0.774734	1.73867	0.924222	1.4639	1.09302	1.09076	1.69432	1.6652	1.43933	1.94827	1.15653	1.42694	0	1	1
chr5	116886378	116886436	chr5-116886378-DEL-59	chr5	116870001	116895000	0.273909	0	0	0	0	0	0	0	0	0	0	0	0	0.244751	0	0	0	0	0	0	0	0.4623	0	0.674848	0	0	0	23	0.530782	0.530782
chr5	122498615	122498686	chr5-122498615-DEL-72	chr5	122490001	122515000	0.300692	0.624274	0.608431	0.672378	0.948508	0.660942	0	0.376045	0.633367	0.699495	0.389165	0	0.559751	0.559962	0.48499	0.546429	0.595128	0.640823	0.571958	0.869535	0.990051	1.39239	0.556446	0.953525	0.749394	0.57572	0.830867	2	0.586471	0.586471
chr5	124898461	124898534	chr5-124898461-DEL-74	chr5	124890001	124915000	0.360561	0.401797	0.694247	0.708903	0.857155	0.388405	0	0.60198	0.478583	0.567814	0.32742	0	0.51851	0.461415	1.12937	0.504845	0.803665	0.462894	0.619096	0.509717	0.612071	0	0.489867	0	0	0	0.306795	6	0.938176	0.938176
chr5	124898748	124898920	chr5-124898748-DEL-173	chr5	124890001	124915000	0.360561	0.401797	0.694247	0.708903	0.857155	0.388405	0	0.60198	0.478583	0.567814	0.32742	0	0.51851	0.461415	1.12937	0.504845	0.803665	0.462894	0.619096	0.509717	0.612071	0	0.489867	0	0	0	0.306795	6	0.88	0.88
chr5	124898791	124898855	chr5-124898791-DEL-65	chr5	124890001	124915000	0.360561	0.401797	0.694247	0.708903	0.857155	0.388405	0	0.60198	0.478583	0.567814	0.32742	0	0.51851	0.461415	1.12937	0.504845	0.803665	0.462894	0.619096	0.509717	0.612071	0	0.489867	0	0	0	0.306795	6	0.595155	0.595155
chr5	125028143	125028468	chr5-125028143-DEL-326	chr5	125005001	125030000	0.291836	0.736956	0	0.308898	0.33502	0	0.486377	0.737081	0.559227	0.518659	0.602087	0.439514	0	0	0.60679	0	0.80848	0.741884	0	0.533384	0.530881	0.593329	0	0	0	0	0	11	0.117926	0.117926
chr5	126667411	126667511	chr5-126667411-DEL-101	chr5	126650001	126675000	0.922947	1.59512	1.53849	1.48266	1.24613	1.57454	1.44617	1.36391	1.77917	1.61819	1.60742	1.47384	1.89052	1.60513	1.82243	1.77476	2.21842	1.54108	1.2326	1.89398	1.58219	1.82386	1.58288	1.35943	1.75669	1.67532	1.84609	0	0.486136	0.486136
chr5	126844369	126844497	chr5-126844369-DEL-129	chr5	126835001	126860000	0.306465	1.1124	0	0	0	0	1.10314	0.459329	1.4615	1.33572	1.25566	1.22386	1.26362	0	0	0	1.54711	1.24941	0	0	1.03379	1.22767	0	1.2066	1.31256	1.18203	0	11	0.397104	0.397104
chr5	128071748	128075224	chr5-128071748-DEL-3477	chr5	128070001	128095000	0.353276	0.667638	0.628364	0.822668	0.429343	0.805146	0.736334	0.737419	0.611594	0.733087	0.896353	0.492559	0.676391	0.547169	0.371342	0.383201	0.451952	0.617871	0.633038	0.729853	0.398981	0.530693	0.321923	0	0	0.443053	0.795777	2	0.595155	0.595155
chr5	139398762	139399055	chr5-139398762-DEL-294	chr5	139390001	139415000	1.23984	2.24427	2.12315	2.18799	2.094	2.41487	2.06031	2.39209	2.39983	1.99841	2.07074	2.24246	1.95448	2.30747	2.54346	2.44323	1.9387	2.05395	2.26435	2.08654	2.43621	2.10006	1.96269	2.08424	1.99386	1.95626	2.35431	0	0.301538	0.301538
chr5	143974070	143974244	chr5-143974070-DEL-175	chr5	143970001	143995000	0.303157	0.793043	0.868617	0.610543	0.768079	0.48082	0.753935	0.414932	0.657565	0.644675	0	0.778262	0.587636	0.808344	0.497507	0	0.814818	0.937433	0.43594	0.437675	0.609372	1.00556	0.574064	0.950067	1.15808	0	0.889016	3	0.686632	0.686632
chr5	143991111	143991202	chr5-143991111-DEL-92	chr5	143970001	143995000	0.303157	0.793043	0.868617	0.610543	0.768079	0.48082	0.753935	0.414932	0.657565	0.644675	0	0.778262	0.587636	0.808344	0.497507	0	0.814818	0.937433	0.43594	0.437675	0.609372	1.00556	0.574064	0.950067	1.15808	0	0.889016	3	0.683217	0.683217
chr5	150366629	150366954	chr5-150366629-DEL-326	chr5	150345001	150370000	0.505989	1.22287	1.38322	1.0261	1.68648	1.33116	0.972636	1.4163	1.51613	1.24021	1.14529	1.03853	1.02028	1.41168	1.13964	1.29009	1.13604	1.30022	0.835311	1.1257	1.00428	1.66348	0.929938	1.57771	0	1.2525	1.41252	1	0.648462	0.648462
chr5	150798100	150802037	chr5-150798100-DEL-3938	chr5	150775001	150800000	0.477037	0	1.33234	0.809953	1.0617	0.879793	0.556514	0.943868	0.73073	0.71332	1.25	0	0.551043	0.428757	0.551229	0.583039	1.17122	0.412549	0.877774	1.00639	0.813229	0.641723	0.592078	0.724111	0.570988	0	1.19964	3	0.0164087	0.0164087
chr5	152515543	152515607	chr5-152515543-DEL-65	chr5	152515001	152540000	0.360901	0.745737	0.797388	1.02586	0.887572	0.999253	0	1.38316	0.751495	0.644332	0.705079	0.685858	0.931799	1.09747	0.574601	0.986646	0	0	0	0	0.943624	1.35976	0.828025	0.736117	0.989341	0.759036	1.26638	5	0.656054	0.656054
chr5	154744624	154744938	chr5-154744624-DEL-315	chr5	154740001	154765000	0.586624	0.45001	0.565563	0.695175	0.531712	0.637893	0.565156	0.743407	0.675743	1.0763	0.889871	0.457162	0.865353	0.536034	0.710659	0.512527	0.699935	0.423038	0.663644	0.439018	0.28372	0.660636	0.507658	0.633265	0.652156	0.604437	0.600237	0	0.208741	0.208741
chr5	160653399	160653497	chr5-160653399-DEL-99	chr5	160635001	160660000	0.475526	0	0	0	0	0	0.420868	0	0	0	0	0	0	0	0	0	0.422709	0	0	0	0.311	0	0	0	0	0	0	23	0.812308	0.812308
chr5	163434777	163436283	chr5-163434777-DEL-1507	chr5	163415001	163440000	0.981349	2.03406	1.75778	1.92574	2.23298	2.31156	1.9908	2.1216	2.11319	2.02297	1.89982	1.85194	2.02467	1.78435	2.2463	2.3181	2.32043	1.88241	2.0067	1.86247	1.66934	1.98928	2.10289	2.25606	1.76427	1.83699	2.24163	0	0.0278591	0.0278591
chr5	170802700	170802753	chr5-170802700-DEL-54	chr5	170795001	170820000	0.585414	1.04512	0.940902	0.928656	0.783808	1.30465	1.15548	1.2052	1.11162	0	0.693858	0.939383	0.9658	1.03794	0.876984	0.461929	0.786901	0.700068	0.609431	1.20799	1.13511	0.676093	0.894012	1.2321	0.662704	0.835178	1.02772	1	0.462387	0.462387
chr5	172189808	172189869	chr5-172189808-DEL-62	chr5	172180001	172205000	0.851575	2.00421	1.62118	1.9106	1.73904	1.99862	1.75609	1.78537	1.98295	1.72702	1.46108	1.91835	1.50794	2.07583	1.41128	1.76527	1.61721	1.63095	1.47601	1.89071	1.6817	1.92959	1.76167	1.65929	1.53988	1.44099	2.00627	0	0.672262	0.672262
chr5	172296737	172296992	chr5-172296737-DEL-256	chr5	172285001	172310000	0.793584	1.40533	1.39067	1.58746	1.61007	1.6761	1.21543	0.985091	1.39865	1.53531	1.33741	1.5395	1.09741	1.71351	1.09246	1.47813	1.39784	1.32245	1.1552	1.47263	1.48096	1.67608	1.58333	0.966453	1.80669	1.25876	1.27662	0	0.237211	0.237211
chr5	172718635	172718724	chr5-172718635-DEL-90	chr5	172695001	172720000	0.919753	1.17823	1.71777	1.37401	1.31192	1.53933	1.18724	1.00942	1.43274	1.59929	1.17404	1.36909	0.977408	1.51657	1.10432	2.0017	1.46742	1.37992	1.45781	1.40508	1.73638	2.03696	1.53492	1.32407	0.922234	1.09772	1.36111	0	0.224232	0.224232
chr5	173273229	173273554	chr5-173273229-DEL-326	chr5	173270001	173295000	0.501486	0.520248	0.17096	0	0	0.510444	0.362473	0	0	0.484785	0.335576	0.263798	0.575269	0.886704	0	0.0225204	0.640456	0.420662	0.555622	0.427817	0.426115	0.740589	0.618563	0.467629	0.716654	0.506164	0.57683	5	0.560362	0.560362
chr5	174320529	174320786	chr5-174320529-DEL-258	chr5	174310001	174335000	0.687046	1.32151	1.49326	1.55232	2.03463	1.40119	0.924423	0.66776	0.605806	0.568287	1.46753	1.58535	1.13093	1.42427	0.968371	1.32344	1.80666	1.76069	0.970698	1.50478	1.27683	1.60014	1.81434	1.73721	1.47966	0.538964	1.36515	0	0.596695	0.596695
chr5	177108225	177108671	chr5-177108225-DEL-447	chr5	177100001	177125000	0.761714	1.58483	1.23587	1.13348	1.36801	1.19628	0.953045	1.40268	0.933686	1.66175	0.936306	1.45804	0.875622	0.955579	1.18236	1.00009	1.94028	1.08003	1.48604	1.08731	1.4458	1.11872	1.27564	1.33276	1.28652	1.12941	1.78016	0	0.483794	0.483794
chr5	177396407	177396595	chr5-177396407-DEL-189	chr5	177375001	177400000	0.621517	0.980663	0.70937	1.40199	1.05433	1.06262	0.910201	0.862081	0.611645	1.12483	1.45266	0.812295	0.823535	1.01051	0	0.789083	1.50874	1.23081	1.01015	1.10181	0.871986	1.49856	0.830649	1.12152	0.858649	0.672026	1.12653	1	0.0537162	0.0537162
chr5	178239494	178239713	chr5-178239494-DEL-220	chr5	178225001	178250000	0.30395	1.28279	1.44083	1.34678	1.44409	1.70967	1.71466	1.33589	1.43862	1.50743	0.947936	0	0	1.6628	1.17413	0	1.81514	1.49502	1.47142	1.60154	0	1.72754	1.59183	0	0	0	0.938171	7	0.910143	0.910143
chr5	180096141	180096311	chr5-180096141-DEL-171	chr5	180085001	180110000	0.216339	0	0.504161	0.272931	0	0	0.610177	0.418901	0.556068	0	0.471002	0.539989	0	0.273682	0.896801	0.606706	0.786396	0	0.343513	0	0	0	0	0.132211	0	0	0	13	1	1
chr5	180617427	180618079	chr5-180617427-DEL-653	chr5	180595001	180620000	0.37936	0.454249	0	0	1.14448	1.07502	0.610971	0.376272	0.811728	0.862823	0.944207	1.00278	0.826516	0.649759	1.05632	0	0.817159	0.889604	0	0.971583	0	1.28808	0.933595	0.691818	1.06047	0	0.804264	6	0.88	0.88
chr5	180617798	180617999	chr5-180617798-DEL-202	chr5	180595001	180620000	0.37936	0.454249	0	0	1.14448	1.07502	0.610971	0.376272	0.811728	0.862823	0.944207	1.00278	0.826516	0.649759	1.05632	0	0.817159	0.889604	0	0.971583	0	1.28808	0.933595	0.691818	1.06047	0	0.804264	6	0.242497	0.242497
chr5	181160699	181160758	chr5-181160699-DEL-60	chr5	181145001	181170000	1.06486	1.61493	1.63988	1.74699	1.91751	2.06091	1.82793	1.70675	1.84918	1.84994	1.7379	2.14379	1.64075	1.92159	2.15125	2.3279	2.77098	1.53457	1.8159	1.98748	1.57212	1.91271	1.13234	2.09839	1.43313	1.79415	1.78912	0	0.457994	0.457994
chr6	229638	229729	chr6-229638-DEL-92	chr6	215001	240000	0.740628	0	0	0	0	0.2439	0	0	0.607543	0.62802	0	0	0	0	0	0	0	0	0	0	0	0	0	0	0.342546	0	0	22	0.935022	0.935022
chr6	396768	396819	chr6-396768-DEL-52	chr6	390001	415000	1.18759	2.07898	2.31178	1.94413	1.90069	2.27618	1.56551	1.98013	2.07007	2.00927	2.08073	2.19433	2.02993	1.90994	1.4469	2.69799	2.50989	1.69861	1.85109	2.59177	1.85736	2.27302	1.78518	2.05746	2.16141	1.48334	2.00979	0	0.607358	0.607358
chr6	396987	397055	chr6-396987-DEL-69	chr6	390001	415000	1.18759	2.07898	2.31178	1.94413	1.90069	2.27618	1.56551	1.98013	2.07007	2.00927	2.08073	2.19433	2.02993	1.90994	1.4469	2.69799	2.50989	1.69861	1.85109	2.59177	1.85736	2.27302	1.78518	2.05746	2.16141	1.48334	2.00979	0	0.667254	0.667254
chr6	601201	601720	chr6-601201-DEL-520	chr6	580001	605000	0.510282	1.25816	0.888305	1.33143	1.22293	1.61236	0.753052	0.941796	1.11007	1.08733	1.45052	0.726614	1.00134	1.28452	0.694483	1.78538	1.3342	1.20059	1.32655	1.23551	1.12441	1.40465	0.857422	1.17655	1.19014	0.881129	1.65985	0	0.356549	0.356549
chr6	601851	602374	chr6-601851-DEL-524	chr6	580001	605000	0.510282	1.25816	0.888305	1.33143	1.22293	1.61236	0.753052	0.941796	1.11007	1.08733	1.45052	0.726614	1.00134	1.28452	0.694483	1.78538	1.3342	1.20059	1.32655	1.23551	1.12441	1.40465	0.857422	1.17655	1.19014	0.881129	1.65985	0	0.789741	0.789741
chr6	1441376	1441473	chr6-1441376-DEL-98	chr6	1425001	1450000	0.281524	0.736715	0	0	0.980484	0.632256	0	0.462694	0.792538	0	0	0.800287	0.413229	0	0	0.714155	0.754206	0.526763	0.779936	0.247846	0.589655	0.95197	0.786231	0.636221	0	0.665016	0.494699	8	0.384615	0.384615
chr6	5037015	5038941	chr6-5037015-DEL-1927	chr6	5020001	5045000	0.321725	0	0.200181	0.5553	1.02547	0.619128	0.648778	0.591112	0	0.780751	0	0.947522	0.658727	0.474012	0.931816	0.583524	0.477396	0.933341	0.380878	0.509633	0.563503	0.867242	0.771375	0	0.870678	0.553976	0	5	0.230769	0.230769
chr6	5134983	5135458	chr6-5134983-DEL-476	chr6	5125001	5150000	0.720484	1.41223	0.675885	0.857352	1.17274	1.39068	1.0319	0.859511	0.944394	1.20471	0.956821	1.26141	1.01884	1.18215	1.24768	0.923173	0.701542	1.39965	1.0452	1.44851	0.924817	1.55619	0.887822	1.16396	1.0047	1.00556	1.16045	0	0.101431	0.101431
[truncated: 2,902 more rows]
