# Supplementary material for: An integrative TAD catalog in lymphoblastoid cell lines discloses the functional impact of deletions and insertions in human genomes
Source: HighWire-hosted journal article supplement (doi:10.1101/gr.279419.124), 2024-12-01
Supplement: Supplemental_Table_S6.xlsx [file Supplemental_Table_S6.xlsx]

## Sheet: Table S7
Table S6. Summary statistics of the homozygous and heterozygous TAD-SVs' associated test with boundary scores
Deletions (Insertions is attached after deletions starting from row 21)
CHROM	START_POS	END_POS	INFO_ID	BOUND_CHR	FLANK_START	FLANK_END	BOUND_SCORE	GM18534	GM18939	GM19036	GM19240	GM19650	GM19833	GM20509	GM20847	HG00096	HG00171	HG00514	HG00733	HG00864	HG01114	HG01505	HG01573	HG01596	HG02011	HG02018	HG02492	HG02587	HG03009	HG03065	HG03371	HG03683	HG03732	num_NaNs	pvalue_0_1	qvalue	pvalue_0_1_2	qvalue_0_1_2
chr1	214679646	214679711	chr1-214679646-DEL-66	chr1	214660001	214685000	0.3594	0.929314	0.79034	1.06511	0.553524	1.14618	0.694319	0.881749	0.926213	1.02137	0.713866	0.885164	0.999057	0	0.555918	0.527397	0.591623	1.02343	0.986477	1.15663	0	0.774954	0.661288	0.890196	1.10845	0.773169	0.86739	2	0.00415804	0.00415804	0.00620036	0.00620036
chr11	44721640	44721690	chr11-44721640-DEL-51	chr11	44715001	44740000	0.244781	0.509184	0.183074	0.409228	0.515445	0.248942	0.23726	0	0.238158	0.467414	0	0	0	0.30007	0	0	0.517463	0.156708	0.379333	0.12463	0	0.346166	0.259432	0	0.380939	0.412941	0.504419	8	0.0169323	0.0169323	0.0512856	0.0512856
chr12	120988010	120988072	chr12-120988010-DEL-63	chr12	120970001	120995000	0.534358	0.649276	1.21329	1.07164	0.978969	1.19827	1.15829	1.42998	0.539257	0.66749	1.16308	1.27966	0	1.27398	0	0	1.07604	1.2929	1.06246	1.09088	1.20397	0.871	0.991481	1.22929	1.22867	0.807929	1.26059	3	0.0302508	0.0302508	0.0947992	0.0947992
chr13	25371384	25371435	chr13-25371384-DEL-52	chr13	25360001	25385000	0.358764	0.853675	0.36726	0.892796	1.08036	0.793402	0.473524	0.875921	0.73192	1.01215	0.6887	0.765461	0.609085	1.145	0.675592	0.894136	1.04847	0.668544	0.919034	0.387076	0.721536	0.930626	0.537235	0.771586	0.824816	0.555246	0.8205	0	0.00131219	0.00131219	0.0060293	0.0060293
chr13	111052147	111052548	chr13-111052147-DEL-402	chr13	111045001	111070000	0.669568	0.943744	1.03454	1.15056	1.273	1.1433	1.06538	1.20534	1.00373	1.00204	1.09767	0.864148	0.755683	1.02132	0.882181	0.817472	1.44185	1.43118	1.00628	1.12475	0.844126	1.8526	1.28319	1.5098	1.56653	0.935228	1.54297	0	0.0131434	0.0131434	0.0359367	0.0359367
chr13	112036989	112037095	chr13-112036989-DEL-107	chr13	112025001	112050000	0.248368	0.567778	0.673167	0.275153	0.264039	0.518411	0.296789	0.155417	0.686567	0.48623	0.304371	0	0	0.250829	0.528588	0.252736	0	0.269155	0.630495	0.288776	0.43052	0.669518	0.365587	0	0.527168	0.231343	0.295237	4	0.0476224	0.0476224	0.116778	0.116778
chr17	57846215	57846305	chr17-57846215-DEL-91	chr17	57835001	57860000	0.983644	1.41549	1.59758	1.907	1.80178	1.83092	1.71503	1.37986	1.91393	1.80779	1.70964	1.45383	1.68194	1.76146	1.52002	1.33073	2.22336	1.82104	1.49948	1.55034	1.88059	1.6798	1.41701	1.52401	1.92942	1.74635	1.95291	0	0.0107665	0.0107665	0.0192245	0.0192245
chr18	49493482	49493803	chr18-49493482-DEL-322	chr18	49485001	49510000	0.640447	0.850955	0.662541	0.995308	0.818767	0.731512	1.134	0.990291	1.09896	1.32293	1.02964	1.1088	0.887593	1.27024	1.05748	1.03625	1.05301	0.988635	1.37012	1.22502	0.85227	0.986524	0.870995	1.2308	0.811879	1.1541	1.19641	0	0.03	0.03	0.0540811	0.0540811
chr19	8884375	8884521	chr19-8884375-DEL-147	chr19	8880001	8905000	0.39884	0.759255	0.774219	0	0.284936	0	1.04633	0	0.837544	0	0.762682	0.904292	0.361392	0	1.11146	0.34246	0	0	0	0.309791	0	0	0.455548	0	0.497323	0	0.28729	12	0.0149935	0.0149935	0.0330542	0.0330542
chr19	39196681	39196754	chr19-39196681-DEL-74	chr19	39190001	39215000	0.30283	0.607387	0.664876	0.515434	0.362484	0.832831	0.716576	0.544483	0.889373	0.744878	0.884086	0.595038	0.517933	0.831319	1.28461	0.901689	0.989548	0.908546	0.425518	0.62366	0.934653	1.21001	0.388521	0	0.973335	0.604049	0.817419	1	0.0467072	0.0467072	0.0553219	0.0553219
chr2	44556449	44556769	chr2-44556449-DEL-321	chr2	44540001	44565000	0.24303	0.883155	0.889763	0.469161	0.479447	0.520387	0.694847	0.591024	0.555494	0.472422	0.326199	0.48499	0.285434	0.604888	0.474038	0.601236	0	0.877004	0.383159	0.77387	0.779942	0.642505	0.43904	0.5863	0.580135	0.822651	0.625385	1	0.00335024	0.00335024	0.0175223	0.0175223
chr3	162999524	163005765	chr3-162999524-DEL-6242	chr3	163005001	163030000	0.247133	0.0937421	0.590736	0	0.309462	0.354124	0.392585	0	0.0812951	0.296617	0.252456	0	0.286095	0.217081	0.270785	0.548696	0	0	0.465469	0.13809	0.335762	0.395918	0.233108	0	0.465781	0	0	8	0.0165474	0.0165474	0.0484301	0.0484301
chr3	195613341	195613474	chr3-195613341-DEL-134	chr3	195610001	195635000	0.887852	0	0	2.25114	0	1.84816	0	0	1.92792	0	0	0.852805	1.81737	0	0	2.34282	1.58826	1.50615	1.30207	0	3.05764	2.44294	1.81315	0	1.46319	2.1983	0.951895	11	0.0232984	0.0232984	0.0421929	0.0421929
chr4	87347092	87353146	chr4-87347092-DEL-6055	chr4	87330001	87355000	0.606939	1.48915	1.77565	1.16462	1.38827	1.06766	1.01716	1.02061	1.33475	1.8411	1.28766	1.41984	1.37024	1.45754	1.63591	1.17211	1.40222	1.34769	0.832007	1.38231	1.49158	1.06381	1.14076	1.61202	1.07885	1.31604	1.21995	0	0.0127717	0.0127717	0.0257076	0.0257076
chr7	149878840	149879003	chr7-149878840-DEL-164	chr7	149875001	149900000	0.620092	1.55118	0.719347	0.681695	0.69164	0.687155	0.737649	0	0.828447	0.726386	0	0.552475	1.13431	0.752857	0	0	0	0	0.538507	1.0137	0	0.531019	0.96458	0	0.516652	0.804217	1.40529	8	0.0230573	0.0230573	0.0078347	0.0078347
chr7	158164354	158164415	chr7-158164354-DEL-62	chr7	158140001	158165000	0.472228	0.97692	0.558201	0.619627	0.900173	0.655982	0.887233	0.50241	0.839117	0.664038	0.965183	1.24577	0	0.886343	0	0.760068	0.648482	1.19165	0.841537	0.967346	0.787647	0.420725	1.13362	1.25716	0.671085	0.864261	0	3	0.048647	0.048647	0.0563795	0.0563795
chr8	644401	649414	chr8-644401-DEL-5014	chr8	640001	665000	0.222525	0.733518	0	1.09764	0	0	0.584421	0	0	1.48568	0	0.89639	0	0	0.526408	0	0.558817	0	0.797682	0.389067	0	1.32305	0.953547	1.0649	0	0	0	14	0.00252356	0.00252356	0.00390876	0.00390876
Insertions
CHROM	START_POS	END_POS	INFO_ID	BOUND_CHR	FLANK_START	FLANK_END	BOUND_SCORE	GM18534	GM18939	GM19036	GM19240	GM19650	GM19833	GM20509	GM20847	HG00096	HG00171	HG00514	HG00733	HG00864	HG01114	HG01505	HG01573	HG01596	HG02011	HG02018	HG02492	HG02587	HG03009	HG03065	HG03371	HG03683	HG03732	num_NaNs	pvalue_0_1	qvalue	pvalue_0_1_2	qvalue_0_1_2
chr1	154755493	154755493	chr1-154755493-INS-61	chr1	154740001	154765000	0.276206	0.690446	0.866664	0	0.737667	0.64537	0.458864	0.339296	0.826718	0.798503	0.588132	0.714431	0.686113	0.989226	0.575487	0.847722	0.810761	1.00884	0.426792	1.16957	0	0.392245	0.928922	0	1.03448	0.299732	0.550461	3	0.0414462	0.0414462	0.0719541	0.0719541
chr11	76934760	76934760	chr11-76934760-INS-53	chr11	76910001	76935000	0.450867	0.888113	1.25729	0.974035	1.19493	0.814763	1.08353	0	0.965234	1.09002	1.18971	1.11361	0.888313	1.28575	0	0.820243	1.34962	1.23993	0.762012	0.851668	0.875153	1.23076	1.05679	0.787283	1.32343	0.732651	0.864365	2	0.0169323	0.0169323	0.0306913	0.0306913
chr13	20497497	20497497	chr13-20497497-INS-95	chr13	20480001	20505000	0.809678	1.47125	1.33	1.67178	2.19129	1.94902	1.61986	1.56161	1.36165	1.5378	1.11675	1.29388	1.48582	1.54262	1.51498	1.37149	1.67665	1.28205	1.9263	1.57725	1.4949	2.24723	1.30357	1.71991	1.90585	1.37377	1.46021	0	0.00527244	0.00527244	0.0227932	0.0227932
chr15	76198866	76198866	chr15-76198866-INS-67	chr15	76175001	76200000	0.273497	1.42981	1.53972	1.20012	0	0	0	0	1.15319	1.63747	1.35451	0	1.44381	1.5919	0.880399	0	0	0	1.34369	0	1.24277	0	0	0	0	1.33738	0	14	0.023693	0.023693	0.0370436	0.0370436
chr17	315167	315167	chr17-315167-INS-302	chr17	295001	320000	0.223573	0	0	0	0	0	0	0	0	0	0	0	0.686489	0.715923	0.683046	0.613378	0	0	0	0	0.374968	0	0.300119	0.684503	0	0	0	19	0.0351833	0.0351833	0.01413	0.01413
chr17	80840656	80840656	chr17-80840656-INS-56	chr17	80835001	80860000	0.486291	0.97501	0.934119	1.14337	1.01848	0.975342	0.587823	1.01537	0	0	1.03024	0.569383	0.799856	0	0.790121	0.588104	0.921677	0.604693	0.677373	0.842773	1.11715	0.663802	1.19877	0.457084	0	0.97677	1.08247	4	0.0351833	0.0351833	0.0450744	0.0450744
chr17	82215698	82215698	chr17-82215698-INS-404	chr17	82195001	82220000	0.527753	1.24232	1.17864	0.897131	1.19887	0.99024	0.799573	0.843507	1.19645	0.800077	1.35173	1.14722	1.40334	1.07282	1.29226	0.867246	0.853915	0.931455	1.11445	0.642013	1.05761	0.788597	0.543459	0	1.14541	1.14734	1.13302	1	0.0220755	0.0220755	0.0572155	0.0572155
chr19	37789443	37789443	chr19-37789443-INS-1092	chr19	37780001	37805000	0.243764	1.5334	0.289078	0	1.52813	0	1.25986	0.505184	0	0.511887	0.314582	0.50907	0.279927	0	1.87791	0.500137	0.908896	0.359094	0.311231	1.27299	0.373349	0.765727	0.34978	0	0.340655	0	0.61169	6	0.00180694	0.00180694	0.00957903	0.00957903
chr2	36777089	36777089	chr2-36777089-INS-308	chr2	36760001	36785000	0.22977	0.301453	0.750919	0.380482	0.647544	0.318563	0.387853	0.454865	0	0.385472	0.34021	0.434326	0.407896	0	0.305837	0.480573	0.594956	0.525181	0.542921	0	0.151998	0.701601	0.689164	0.702434	0.510502	0.481053	0.816512	3	0.00768133	0.00768133	0.0300071	0.0300071
chr2	159519810	159519810	chr2-159519810-INS-159	chr2	159505001	159530000	0.211877	0	0.229023	0.325916	0.234856	0.392967	0.651255	0.613754	0.408336	0.697896	0.352814	0	0.167027	0	0	0	0.267066	0	0	0	0	0.420293	0	0	0.525782	0.314812	0.42823	11	0.0110416	0.0110416	0.0303232	0.0303232
chr2	178757149	178757149	chr2-178757149-INS-90	chr2	178750001	178775000	0.255475	0.948544	0.772293	1.05069	0.688147	0.8598	0.400139	0	0.544239	0.855681	0.792986	0.694355	0.584043	1.12887	0	0.922033	0.924309	0.898792	0	0.92436	0.48665	1.06222	0.478497	0.788622	0.639234	0.662831	0.732747	3	0.012405	0.012405	0.0418832	0.0418832
chr20	31730454	31730454	chr20-31730454-INS-1425	chr20	31725001	31750000	1.36692	2.05361	1.77292	2.19595	2.05678	0	1.98722	1.84033	1.99627	1.82084	1.53043	1.92474	2.03774	2.22433	1.69701	1.89878	2.11256	1.83911	2.06634	2.13322	1.88941	2.24279	1.6822	2.31103	2.2145	1.85208	1.81832	1	0.0230573	0.0230573	0.03196	0.03196
chr3	3190695	3190695	chr3-3190695-INS-1382	chr3	3180001	3205000	1.06686	1.69867	2.17895	1.69799	1.67459	1.93301	1.31406	1.41255	1.65157	1.99288	1.87541	1.88171	1.55809	1.95023	1.46204	1.82059	1.59993	1.85901	1.79639	1.92092	2.01387	2.0462	1.51614	1.6465	1.9942	1.69626	1.76341	0	0.0342049	0.0342049	0.0721771	0.0721771
chr3	45501161	45501161	chr3-45501161-INS-319	chr3	45490001	45515000	0.528023	1.16613	1.45265	1.6008	1.74638	1.37875	1.49008	1.15784	1.18861	1.24565	1.23403	1.11325	1.26459	1.55205	1.39848	1.48774	1.34744	1.53344	1.47949	1.49574	0.935565	1.91563	1.23265	1.22837	1.24719	1.16009	2.37531	0	0.0290455	0.0290455	0.01396	0.01396
chr3	84900406	84900406	chr3-84900406-INS-15193	chr3	84890001	84915000	0.24509	0.685173	0	0.369883	0.846114	0.427347	0.811804	0	0.426314	0	0	0	0.57121	0	0.163368	0	0	0.589773	0.421621	0.694805	0.362226	0.664351	0.620795	0.584235	0.711881	0.219085	0.413103	8	0.00598966	0.00598966	0.00070939	0.00070939
chr3	145272499	145272499	chr3-145272499-INS-8632	chr3	145260001	145285000	0.218929	0.332585	0.458747	0.353484	0.464609	0.346546	0.684553	0	0.641051	0.432159	0.399718	0	0.298441	0	0	0	0	0.587968	0.451705	0.179635	0	0.33207	0.299718	0.401311	0	0.139183	0	9	0.012405	0.012405	0.0392567	0.0392567
chr3	151664751	151664751	chr3-151664751-INS-10490	chr3	151650001	151675000	0.263043	0.172989	0	0	0.280844	0.500022	0.273985	0	0.177387	0.645849	0.200172	0.497789	0.226278	0.41728	0.596944	0.314518	0.629524	0.362023	0.457453	0.593131	0.451131	0.196953	0.296315	0	0	0.25931	0	6	0.00041128	0.00041128	0.00342415	0.00342415
chr3	195622265	195622265	chr3-195622265-INS-103	chr3	195610001	195635000	0.887852	0	0	2.25114	0	1.84816	0	0	1.92792	0	0	0.852805	1.81737	0	0	2.34282	1.58826	1.50615	1.30207	0	3.05764	2.44294	1.81315	0	1.46319	2.1983	0.951895	11	0.011103	0.011103	0.0337626	0.0337626
chr4	88379688	88379688	chr4-88379688-INS-66	chr4	88365001	88390000	0.803407	1.33132	1.30921	1.37148	1.11555	1.42432	1.27628	1.33481	1.01835	1.44433	1.28332	1.36254	1.23691	0.85796	1.17538	1.16648	1.41611	1.18641	1.44234	1.311	1.15112	1.02031	1.08849	1.19625	1.20314	1.0987	1.57014	0	0.048647	0.048647	0.0518573	0.0518573
chr4	181241392	181241392	chr4-181241392-INS-1020	chr4	181230001	181255000	0.180634	0.331791	0.552283	0	0	0.252448	0	0.565637	0.269308	0.398935	0	0.124908	0	0	0.434054	0.259064	0	0.447058	0.180868	0.500178	0	0	0.714293	0	0	0	0	13	0.00090189	0.00090189	0.00332066	0.00332066
chr6	170394631	170394631	chr6-170394631-INS-152	chr6	170390001	170415000	0.247605	0	0	0	0.666179	0.567946	0	0.467417	0.319305	0.564722	0	0.151272	0	0.407249	0.451573	0.812279	0.358754	0	0.360984	0	0.650579	0	0	0.692601	0	0.403806	0	12	0.030915	0.030915	0.0701958	0.0701958
chr6	170399369	170399369	chr6-170399369-INS-349	chr6	170390001	170415000	0.247605	0	0	0	0.666179	0.567946	0	0.467417	0.319305	0.564722	0	0.151272	0	0.407249	0.451573	0.812279	0.358754	0	0.360984	0	0.650579	0	0	0.692601	0	0.403806	0	12	0.0155126	0.0155126	0.00042907	0.00042907
chr7	158151084	158151084	chr7-158151084-INS-288	chr7	158140001	158165000	0.472228	0.97692	0.558201	0.619627	0.900173	0.655982	0.887233	0.50241	0.839117	0.664038	0.965183	1.24577	0	0.886343	0	0.760068	0.648482	1.19165	0.841537	0.967346	0.787647	0.420725	1.13362	1.25716	0.671085	0.864261	0	3	0.048647	0.048647	0.0447905	0.0447905
chr7	158151485	158151485	chr7-158151485-INS-628	chr7	158140001	158165000	0.472228	0.97692	0.558201	0.619627	0.900173	0.655982	0.887233	0.50241	0.839117	0.664038	0.965183	1.24577	0	0.886343	0	0.760068	0.648482	1.19165	0.841537	0.967346	0.787647	0.420725	1.13362	1.25716	0.671085	0.864261	0	3	0.0158128	0.0158128	0.035021	0.035021
chr7	158163680	158163680	chr7-158163680-INS-193	chr7	158140001	158165000	0.472228	0.97692	0.558201	0.619627	0.900173	0.655982	0.887233	0.50241	0.839117	0.664038	0.965183	1.24577	0	0.886343	0	0.760068	0.648482	1.19165	0.841537	0.967346	0.787647	0.420725	1.13362	1.25716	0.671085	0.864261	0	3	0.048647	0.048647	0.0563795	0.0563795
chr8	46988983	46988983	chr8-46988983-INS-74	chr8	46970001	46995000	0.368605	0.702721	0	0	0.0137175	0.493276	0	0.834014	0.781749	0.584397	0.546901	0.542593	0.791472	0.715184	0.445734	0.958993	0.325323	0	0	0.736246	0.655137	0.287273	0.521288	0.662347	0.43575	0	0	7	0.0458585	0.0458585	0.0750386	0.0750386
chr9	34115453	34115453	chr9-34115453-INS-302	chr9	34095001	34120000	0.372049	0.57436	0.522531	0.323952	0	0.531558	0.249189	0.420019	0	0.511861	0.666906	0.444785	0	0.384686	0.430998	0	0.439116	0	0.894882	0	0.616215	1.1738	0	0	0	0.448397	0.47766	9	0.0160101	0.0320201	0.0491697	0.0491697
chr9	94551960	94551960	chr9-94551960-INS-319	chr9	94535001	94560000	0.381634	0.461513	0.819766	0.117431	0.201903	0.479226	0.846183	0	0.292841	0	0	0.625204	0.606239	0.592412	0	0	0.430191	0.809976	0	0.535835	0.591738	0	0.517112	0.803014	0	1.11768	0.458884	8	0.0472615	0.0472615	0.0355374	0.0355374
