# Supplementary material for: An integrative TAD catalog in lymphoblastoid cell lines discloses the functional impact of deletions and insertions in human genomes
Source: HighWire-hosted journal article supplement (doi:10.1101/gr.279419.124), 2024-12-01
Supplement: Supplemental_Table_S7.xlsx [file Supplemental_Table_S7.xlsx]

## Sheet: Table S8
Table S7. List of TAD-SVs that intersect with ENCODE cCREs
TAD-SV identifier	cCRE accession ID	cCRE annotation
chr1-27608854-DEL-133	EH38E2797979	dELS,CTCF-bound
chr10-53023782-DEL-5287	EH38E1468643	dELS
chr10-53023782-DEL-5287	EH38E1468644	dELS,CTCF-bound
chr11-44721640-DEL-51	EH38E2955622	dELS
chr15-91047755-DEL-260	EH38E1788036	dELS
chr17-76283603-DEL-945	EH38E3244456	dELS,CTCF-bound
chr18-26167842-DEL-3517	EH38E3261256	dELS
chr18-26167842-DEL-3517	EH38E3261257	PLS
chr18-49493482-DEL-322	EH38E3268379	pELS
chr18-79521174-DEL-263	EH38E3278313	dELS
chr2-44556449-DEL-321	EH38E3340652	dELS
chr2-44556449-DEL-321	EH38E3340653	dELS
chr22-45993789-DEL-60	EH38E3487379	dELS,CTCF-bound
chr3-44510750-DEL-50	EH38E3509308	PLS,CTCF-bound
chr5-150798100-DEL-3938	EH38E2421381	dELS,CTCF-bound
chr5-150798100-DEL-3938	EH38E2421382	dELS,CTCF-bound
chr5-163434777-DEL-1507	EH38E2427512	dELS
chr6-87408456-DEL-133	EH38E3719661	pELS,CTCF-bound
chr6-87408456-DEL-133	EH38E3719662	pELS,CTCF-bound
chr7-2225230-DEL-60	EH38E3753810	dELS
chr7-158164354-DEL-62	EH38E3812597	dELS
chr8-39374555-DEL-155154	EH38E2626179	dELS
chr8-39374555-DEL-155154	EH38E2626180	dELS
chr8-39374555-DEL-155154	EH38E2626181	dELS
chr8-39374555-DEL-155154	EH38E2626184	dELS,CTCF-bound
chr8-39374555-DEL-155154	EH38E2626186	DNase-H3K4me3
chr8-39374555-DEL-155154	EH38E2626187	DNase-H3K4me3
chr8-39374555-DEL-155154	EH38E2626188	dELS,CTCF-bound
chr8-39374555-DEL-155154	EH38E3829794	dELS,CTCF-bound
chr8-39374555-DEL-155154	EH38E3829795	dELS,CTCF-bound
chr8-39374555-DEL-155154	EH38E2626190	dELS
chr8-39374555-DEL-155154	EH38E3829796	pELS
chr8-39374555-DEL-155154	EH38E3829797	PLS
chr8-39374555-DEL-155154	EH38E3829798	CTCF-only,CTCF-bound
chr8-143618315-DEL-14208	EH38E3868959	pELS,CTCF-bound
chr8-143618315-DEL-14208	EH38E3868958	pELS,CTCF-bound
chr8-143618315-DEL-14208	EH38E3868960	dELS,CTCF-bound
chr8-143618315-DEL-14208	EH38E2675436	dELS
chr8-143618315-DEL-14208	EH38E3868962	pELS
chr1-248404196-INS-8323	EH38E1440642	DNase-H3K4me3,CTCF-bound
chr15-29561004-INS-6936	EH38E3125071	dELS
chr17-82215698-INS-404	EH38E1893132	pELS,CTCF-bound
chr19-16197976-INS-50	EH38E3293959	PLS,CTCF-bound
chr19-47419531-INS-4301	EH38E3311482	PLS,CTCF-bound
chr19-47419531-INS-9813	EH38E3311482	PLS,CTCF-bound
chr2-178757149-INS-90	EH38E3387477	dELS
chr3-123043973-INS-60	EH38E2232545	CTCF-only,CTCF-bound
chr3-151664751-INS-10490	EH38E2248830	dELS
chr3-151664880-INS-78	EH38E2248831	dELS
chr5-1667294-INS-117	EH38E3622981	DNase-H3K4me3,CTCF-bound
chr5-1667294-INS-52	EH38E3622981	DNase-H3K4me3,CTCF-bound
chr6-27681016-INS-72	EH38E2456764	pELS
chr6-151669148-INS-55	EH38E3741353	dELS,CTCF-bound
chr7-158151084-INS-288	EH38E2604964	dELS
chr7-158151485-INS-628	EH38E3812593	dELS,CTCF-bound
