# Supplementary material for: An integrative TAD catalog in lymphoblastoid cell lines discloses the functional impact of deletions and insertions in human genomes
Source: HighWire-hosted journal article supplement (doi:10.1101/gr.279419.124), 2024-12-01
Supplement: Supplemental_Table_S8.xlsx [file Supplemental_Table_S8.xlsx]

## Sheet: Table S9
Table S8. List of TAD-SVs that intersect with the database of GWAS SNP-SV pairs in high LD
TAD-SVs	SV-eQTL	SV-sQTL	SVS	FLANK	G_VALUE	P_VALUE(G)	SNPS	DISEASE/TRAIT	MAPPED_TRAIT	OR or BETA	P-VALUE	CHR_ID	CHR_POS	STRONGEST SNP-RISK ALLELE	RISK ALLELE FREQUENCY	REPORTED GENE(S)	MAPPED_GENE	RowNum
chr10-1409635-DEL-445			SV7776	+100k	0.848049	1.43e-11	rs17293817	Ejection fraction in Tripanosoma cruzi seropositivity	ejection fraction measurement		2e-06	10	1410591	rs17293817-?	NR	NR	ADARB2	182545
chr11-46014685-DEL-347			SV14088	+100k	0.867995	2.36e-14	rs4237660	Cortical surface area	cortical surface area measurement		2e-08	11	46013915	rs4237660-C	0.3399	NR	PHF21A	300239
chr16-88796244-DEL-945			SV34880	+100k	0.931047	6.15e-14	rs2272443	Heel bone mineral density	heel bone mineral density	0.0250528	2e-27	16	88787600	rs2272443-C	0.774944	PIEZO1	PIEZO1 - CDT1	6052
chr16-88796244-DEL-945			SV34880	+100k	0.931047	6.15e-14	rs2272443	Heel bone mineral density	heel bone mineral density		5e-20	16	88787600	rs2272443-?	NR		PIEZO1 - CDT1	337349
chr16-88796244-DEL-945			SV34880	+100k	0.931047	6.15e-14	rs2272443	Heel bone mineral density	heel bone mineral density	0.0224558	3e-21	16	88787600	rs2272443-?	NR		PIEZO1 - CDT1	84841
chr18-49493482-DEL-322	Y		SV40778	-100k	0.873698	1.11e-14	rs34092054	Hip circumference adjusted for BMI	BMI-adjusted hip circumference	0.0169491	2e-09	18	49488950	rs34092054-A	NR	RPL17-C18orf32, MIR1539, RPL17	RPL17, RPL17-C18orf32	340898
chr18-49493482-DEL-322	Y		SV40778	+100k	1	2.37e-17	rs1133353 x rs7229278	Total PHF-tau (SNP x SNP interaction)	PHF-tau measurement		4e-08	18	49496556	rs1133353-? x rs7229278-?	NR	NR x NR	No mapped genes x SRP72P1	46640
chr2-44556449-DEL-321			SV48425	+100k	0.957831	1.72e-16	rs12468040	Educational attainment (MTAG)	self reported educational attainment	0.0122	1e-19	2	44627842	rs12468040-T	0.3819	Intergenic	CAMKMT	134278
chr2-44556449-DEL-321			SV48425	+100k	0.957831	1.72e-16	rs12468040	Educational attainment (years of education)	self reported educational attainment		6e-16	2	44627842	rs12468040-?	NR		CAMKMT	316085
chr2-44556449-DEL-321			SV48425	+100k	0.957831	1.72e-16	rs12468040	Educational attainment (years of education)	self reported educational attainment	0.0137	3e-21	2	44627842	rs12468040-T	0.3819		CAMKMT	84979
chr2-44556449-DEL-321			SV48425	+100k	0.957831	1.72e-16	rs10191477	General risk tolerance (MTAG)	risk-taking behaviour	0.0081	2e-11	2	44631548	rs10191477-T	0.386	CAMKMT	CAMKMT	49
chr2-44556449-DEL-321			SV48425	+100k	0.877505	9.36e-15	rs4324362	Age at first sexual intercourse	age at first sexual intercourse measurement	0.0266273	1e-11	2	44639754	rs4324362-G	0.379905	CAMKMT	CAMKMT	175422
chr5-150798100-DEL-3938			SV78323	-100k	0.846224	3.02e-11	rs11741861	Crohn's disease	Crohn's disease		2e-19	5	150898347	rs11741861-?		RPS14, TCOF1, CD74, NDST1, SYNPO, MYOZ3, DCTN4, SMIM3, AC010441.1, IRGM, ZNF300, GPX3, ANXA6, SLC36A3, SLC36A2, RBM22, TNIP1, CCDC69, GM2A	IRGM, ZNF300	229713
chr5-150798100-DEL-3938			SV78323	-100k	0.846224	3.02e-11	rs11741861	Ulcerative colitis	ulcerative colitis	1.12804	7e-08	5	150898347	rs11741861-G	0.07656	NR	IRGM, ZNF300	160952
chr5-150798100-DEL-3938			SV78323	-100k	0.846224	3.02e-11	rs11741861	Inflammatory bowel disease	inflammatory bowel disease		3e-15	5	150898347	rs11741861-?		RPS14, TCOF1, CD74, NDST1, SYNPO, MYOZ3, DCTN4, SMIM3, AC010441.1, IRGM, ZNF300, GPX3, ANXA6, SLC36A3, SLC36A2, RBM22, TNIP1, CCDC69, GM2A	IRGM, ZNF300	233121
chr5-150798100-DEL-3938			SV78323	-100k	0.846224	3.02e-11	rs11741861	Inflammatory bowel disease	inflammatory bowel disease	1.249	3e-37	5	150898347	rs11741861-G	0.093	TNIP1, IRGM, ZNF300P1	IRGM, ZNF300	181615
chr5-150798100-DEL-3938			SV78323	-100k	0.846224	3.02e-11	rs11741861	Crohn's disease	Crohn's disease	1.32921	6e-44	5	150898347	rs11741861-G	0.07656	NR	IRGM, ZNF300	159862
chr7-126657145-DEL-70	Y		SV90153	-100k	0.843834	5.6e-13	rs2097641	Externalizing behaviour (multivariate analysis)	attention deficit hyperactivity disorder, substance abuse, antisocial behaviour measurement	0.007	1e-08	7	126649421	rs2097641-G	0.614		GRM8	252743
chr7-126657145-DEL-70	Y		SV90153	-100k	0.945035	5.75e-15	rs7811921	Neuroticism	neuroticism measurement	5.54	3e-08	7	126656173	rs7811921-T	NR	NR	GRM8	103263
chr7-158164354-DEL-62			SV91872	+100k	1	2.09e-16	rs4272321	Coronary artery calcified atherosclerotic plaque (130 HU threshold) in type 2 diabetes	coronary artery calcification	0.262	8e-07	7	158159143	rs4272321-?	NR	PTPRN2	PTPRN2	190996
chr8-10833579-DEL-128			SV93701	-100k	0.809071	2.46e-13	rs4841436	Aspartate aminotransferase levels	aspartate aminotransferase measurement	9.26	2e-20	8	10736964	rs4841436-C	0.4	SOX7, PINX1	PINX1, PINX1	14063
chr8-10833579-DEL-128			SV93701	-100k	0.809071	2.46e-13	rs4841436	Systolic blood pressure	systolic blood pressure		3e-08	8	10736964	rs4841436-?	NR		PINX1, PINX1	372479
chr8-10833579-DEL-128			SV93701	-100k	0.840151	4.65e-14	rs2116093	Spherical equivalent or myopia (age of diagnosis)	refractive error, age at onset, Myopia	5.527	3e-08	8	10755789	rs2116093-C	0.4303	BC043573	PINX1, PINX1	102150
chr8-10833579-DEL-128			SV93701	-100k	0.809071	2.46e-13	rs891556	Medication use (calcium channel blockers)	Calcium channel blocker use measurement	0.0511894	5e-10	8	10766123	rs891556-G	0.397703	PINX1	PINX1, PINX1	131754
chr8-10833579-DEL-128			SV93701	-100k	0.809071	2.46e-13	rs2409669	Phospholipids to total lipids ratio in medium LDL	low density lipoprotein cholesterol measurement, lipid or lipoprotein measurement	0.0280872	3e-11	8	10766459	rs2409669-A	0.393494		PINX1, PINX1	325761
chr8-10833579-DEL-128			SV93701	+100k	0.910661	1.86e-15	rs11986935	Gut microbiota (beta diversity)	gut microbiome measurement	0.97	5e-08	8	10834039	rs11986935-?	NR	SOX7, PINX1	PINX1, PINX1	216787
chr8-10833579-DEL-128			SV93701	+100k	0.877505	9.36e-15	rs4840519	General factor of neuroticism	neuroticism measurement	0.010548	1e-09	8	10835603	rs4840519-T	NR	SOX7, PINX1	PINX1, PINX1	60224
chr8-10833579-DEL-128			SV93701	+100k	0.910661	1.55e-15	rs6989160	Spherical equivalent	refractive error	0.07	4e-10	8	10847850	rs6989160-A		NR	PINX1 - XKR6	61627
chr8-10833579-DEL-128			SV93701	+100k	0.910661	1.55e-15	rs1991651	Sum neutrophil eosinophil counts	neutrophil count, eosinophil count	0.0261034	2e-12	8	10848901	rs1991651-G	0.6178	RP11-177H2.2	PINX1 - XKR6	215395
chr8-10833579-DEL-128			SV93701	+100k	0.910661	1.55e-15	rs1991651	Sum basophil neutrophil counts	neutrophil count, basophil count	0.0269483	3e-13	8	10848901	rs1991651-G	0.6178	RP11-177H2.2	PINX1 - XKR6	215973
chr8-10833579-DEL-128			SV93701	+100k	0.910661	1.55e-15	rs1991651	Granulocyte count	granulocyte count	0.0262839	1e-12	8	10848901	rs1991651-G	0.6178	RP11-177H2.2	PINX1 - XKR6	213043
chr8-10833579-DEL-128			SV93701	+100k	0.910661	1.55e-15	rs1991651	Neutrophil count	neutrophil count		1e-29	8	10848901	rs1991651-G	0.56731	NR	PINX1 - XKR6	44624
chr8-10833579-DEL-128			SV93701	+100k	0.910661	1.55e-15	rs1991651	Myeloid white cell count	myeloid white cell count	0.0267901	5e-13	8	10848901	rs1991651-G	0.6178	RP11-177H2.2	PINX1 - XKR6	232626
chr8-10833579-DEL-128			SV93701	+100k	0.910661	1.55e-15	rs1991651	Neutrophil count	neutrophil count	0.0267595	4e-13	8	10848901	rs1991651-G	0.6178	RP11-177H2.2	PINX1 - XKR6	232724
chr8-10833579-DEL-128			SV93701	+100k	0.910661	1.55e-15	rs1991651	Age at first sexual intercourse	age at first sexual intercourse measurement	0.0181569	2e-17	8	10848901	rs1991651-C	0.382382	LOC101929229	PINX1 - XKR6	278231
chr8-10833579-DEL-128			SV93701	+100k	0.825143	1.02e-13	rs877116	Basophil count	basophil count	0.0161637	9e-13	8	10855435	rs877116-T	0.588763		PINX1 - XKR6	114269
chr8-10833579-DEL-128			SV93701	+100k	0.825143	1.02e-13	rs877116	Mean arterial pressure	mean arterial pressure	0.0194	6e-17	8	10855435	rs877116-T	NR		PINX1 - XKR6	352252
chr8-10833579-DEL-128			SV93701	+100k	0.825143	1.02e-13	rs877116	Basophil count	basophil count	0.016442	4e-15	8	10855435	rs877116-T	0.588647	NR	PINX1 - XKR6	114249
chr8-10833579-DEL-128			SV93701	+100k	0.829369	1.1e-13	rs7819602	Red cell distribution width	red blood cell distribution width	0.0166006	3e-09	8	10869332	rs7819602-G	0.613118		PINX1 - XKR6	98563
chr8-10833579-DEL-128			SV93701	+100k	0.829369	1.1e-13	rs7819602	Systemic lupus erythematosus	systemic lupus erythematosus	1.15	1e-09	8	10869332	rs7819602-?	NR	MSRA	PINX1 - XKR6	87736
chr8-70671321-DEL-1088	Y	Y	SV95069	-100k	1	2.09e-16	rs35580034	Diverticular disease	diverticular disease	0.002428	6e-06	8	70659838	rs35580034-A	0.521848	LACTB2	LACTB2, LACTB2-AS1	31230
chr8-70671321-DEL-1088	Y	Y	SV95069	+100k	1	2.09e-16	rs7017914	Femoral neck bone mineral density	femoral neck bone mineral density	0.03	2e-07	8	70678968	rs7017914-A	0.49	XKR9	XKR9	128571
chr8-70671321-DEL-1088	Y	Y	SV95069	+100k	1	2.09e-16	rs13254770	Waist circumference adjusted for body mass index	BMI-adjusted waist circumference	0.0157965	3e-08	8	70698020	rs13254770-C	NR	XKR9	XKR9	334498
chr8-70671321-DEL-1088	Y	Y	SV95069	+100k	0.840116	2.34e-14	rs1838392	Haemorrhoidal disease	hemorrhoid	1.05	5e-39	8	70770348	rs1838392-T	0.3902	XKR9	XKR9	268620
chr8-143618315-DEL-14208	Y		SV97198	-100k	1	3.36e-13	rs2242086	Serum metabolite levels	serum metabolite measurement	0.426	1e-55	8	143613329	rs2242086-C	0.777636	TSTA3	GFUS, GFUS	21826
chr11-14252402-INS-55			SV13333	-100k	0.86087	8.34e-09	rs2303975	HDL cholesterol levels	high density lipoprotein cholesterol measurement	0.0279	8e-08	11	14255453	rs2303975-A	0.142	COPB1	SPON1	217367
chr12-125316602-INS-3138			SV20488	-100k	1	1.14e-12	rs1666839	Smoking initiation (ever regular vs never regular) (MTAG)	smoking status measurement	0.00699863	4e-10	12	125314817	rs1666839-A	0.622	NR	TMEM132B	88186
chr12-125316602-INS-3138			SV20488	+100k	0.901845	2.44e-11	rs326391	Externalizing behaviour (multivariate analysis)	attention deficit hyperactivity disorder, substance abuse, antisocial behaviour measurement	0.007	2e-08	12	125321681	rs326391-C	0.382		TMEM132B	251618
chr19-37789443-INS-1092	Y	Y	SV44760	-100k	0.869963	9.5e-15	rs11673023	Sex hormone-binding globulin levels	sex hormone-binding globulin measurement	0.00669357	5e-08	19	37748881	rs11673023-C	0.829185	NR	ZNF573	36281
chr19-37789443-INS-1092	Y	Y	SV44760	-100k	0.869963	9.5e-15	rs11673023	Sex hormone-binding globulin levels adjusted for BMI	sex hormone-binding globulin measurement	0.0074998	1e-11	19	37748881	rs11673023-C	0.829185	NR	ZNF573	44728
chr20-31730454-INS-1425	Y		SV55507	+100k	1	2.96e-16	rs6121038	Brain region volumes	brain volume measurement		3e-15	20	31666970	rs6121038-?	NR	NR	BCL2L1	106322
chr20-31730454-INS-1425	Y		SV55507	+100k	1	2.96e-16	rs6121038	Brain region volumes	brain volume measurement		2e-14	20	31666970	rs6121038-?	NR	NR	BCL2L1	104668
chr20-31730454-INS-1425	Y		SV55507	+100k	1	2.96e-16	rs6121038	Brain region volumes	brain volume measurement		1e-13	20	31666970	rs6121038-?	NR	NR	BCL2L1	1617
chr20-31730454-INS-1425	Y		SV55507	+100k	1	2.96e-16	rs6121038	Brain region volumes	brain volume measurement		2e-16	20	31666970	rs6121038-?	NR	NR	BCL2L1	104318
chr20-31730454-INS-1425	Y		SV55507	+100k	0.876423	6.3e-14	rs10439607	Caudate nucleus volume	caudate nucleus volume	6.763	1e-11	20	31670738	rs10439607-A	0.3083	NR	BCL2L1	5600
chr20-31730454-INS-1425	Y		SV55507	+100k	0.876423	6.3e-14	rs10439607	Putamen volume	putamen volume	8.129	4e-16	20	31670738	rs10439607-A	0.3086	NR	BCL2L1	5652
chr20-31730454-INS-1425	Y		SV55507	+100k	0.876423	6.3e-14	rs10439607	Pallidum volume	pallidum volume	6.17	7e-10	20	31670738	rs10439607-A	0.308	NR	BCL2L1	5636
chr20-31730454-INS-1425	Y		SV55507	+100k	0.908645	1.78e-14	rs6060627	Subcortical volume (MOSTest)	neuroimaging measurement, brain volume measurement		2e-22	20	31674356	rs6060627-?		CPED1	BCL2L1	38066
chr20-31730454-INS-1425	Y		SV55507	+100k	0.801996	9.05e-13	rs6060775	Brain region volumes	brain volume measurement		4e-09	20	31698388	rs6060775-?	NR	NR	BCL2L1, BCL2L1-AS1	104212
chr20-31730454-INS-1425	Y		SV55507	+100k	0.801996	9.05e-13	rs6060775	Brain region volumes	brain volume measurement		2e-08	20	31698388	rs6060775-?	NR	NR	BCL2L1, BCL2L1-AS1	106320
chr20-31730454-INS-1425	Y		SV55507	+100k	1	2.96e-16	rs6060796	Lung function (FVC)	vital capacity		5e-14	20	31701236	rs6060796-?	NR		BCL2L1, BCL2L1-AS1	370681
chr20-31730454-INS-1425	Y		SV55507	+100k	1	2.96e-16	rs6087771	Pallidum volume	pallidum volume	5.829	6e-09	20	31718921	rs6087771-T	0.7006	NR	BCL2L1	5637
chr20-31730454-INS-1425	Y		SV55507	+100k	1	2.96e-16	rs6087771	Subcortical brain region volumes	brain volume measurement, putamen volume	33.58	1e-12	20	31718921	rs6087771-T	0.71	BCL2L1	BCL2L1	198942
chr20-31730454-INS-1425	Y		SV55507	+100k	1	2.96e-16	rs6087771	Putamen volume	putamen volume	41.038	2e-09	20	31718921	rs6087771-?	NR	BCL2L1	BCL2L1	175051
chr20-31730454-INS-1425	Y		SV55507	+100k	1	2.96e-16	rs6087771	Caudate nucleus volume	caudate nucleus volume	6.923	4e-12	20	31718921	rs6087771-T	0.7001	NR	BCL2L1	5625
chr20-31730454-INS-1425	Y		SV55507	+100k	1	2.96e-16	rs6087771	Putamen volume	putamen volume	8.672	4e-18	20	31718921	rs6087771-T	0.7	NR	BCL2L1	5653
chr20-31730454-INS-1425	Y		SV55507	-100k	0.876423	6.3e-14	rs6087775	Vertex-wise cortical thickness	cortical thickness	6.65	3e-11	20	31737962	rs6087775-A	0.32		BCL2L1 - TPX2	347700
chr20-31730454-INS-1425	Y		SV55507	-100k	1	2.96e-16	rs6060941	Vertex-wise sulcal depth	brain measurement	5.83	6e-09	20	31779580	rs6060941-T	0.32		TPX2	339951
chr20-31730454-INS-1425	Y		SV55507	-100k	1	2.96e-16	rs6060941	Platelet-to-lymphocyte ratio	platelet-to-lymphocyte ratio		9e-16	20	31779580	rs6060941-C	0.712		TPX2	261180
chr20-31730454-INS-1425	Y		SV55507	-100k	0.876423	6.3e-14	rs6089075	Brain morphology (MOSTest)	brain measurement, neuroimaging measurement		1e-14	20	31805081	rs6089075-?		COX4I2, BCL2L1, AL160175.1, TPX2, MYLK2, FOXS1, DUSP15, TTLL9	TPX2 - MYLK2	39694
chr3-99936541-INS-328	Y		SV63790	-100k	0.805466	6.31e-11	rs1688766	Nonsyndromic cleft lip with cleft palate	Cleft palate, cleft lip	1.23457	5e-07	3	99929006	rs1688766-G	0.83	COL8A1	CMSS1, FILIP1L	166290
chr4-1283682-INS-140		Y	SV67349	+100k	0.913391	2.02e-14	rs13108904	Obesity-related traits	heart rate	0.04	2e-06	4	1297325	rs13108904-A	0.357	MAEA, KIAA1530	MAEA	129104
chr5-55696709-INS-296			SV76193	-100k	0.847834	3.48e-14	rs13156231	White blood cell count	myeloid white cell count		1e-11	5	55634423	rs13156231-G	0.66371	NR	SLC38A9	54497
chr5-55696709-INS-296			SV76193	-100k	0.813262	1.03e-13	rs7704138	Height	body height	0.028	3e-11	5	55648434	rs7704138-T	0.47	SLC38A9	SLC38A9	220017
chr5-55696709-INS-296			SV76193	-100k	0.802164	2.27e-13	rs4326104	Hip index	BMI-adjusted hip circumference	0.0223837	8e-13	5	55659880	rs4326104-G	NR	SLC38A9	SLC38A9	312111
chr7-158163680-INS-193			SV91871	+100k	1	2.09e-16	rs4272321	Coronary artery calcified atherosclerotic plaque (130 HU threshold) in type 2 diabetes	coronary artery calcification	0.262	8e-07	7	158159143	rs4272321-?	NR	PTPRN2	PTPRN2	190996
