# Supplementary material for: An integrative TAD catalog in lymphoblastoid cell lines discloses the functional impact of deletions and insertions in human genomes
Source: HighWire-hosted journal article supplement (doi:10.1101/gr.279419.124), 2024-12-01
Supplement: Supplemental_Table_S9.xlsx [file Supplemental_Table_S9.xlsx]

## Sheet: Table S10
Table S9. Summary statistics of the TAD-SVs that overlapped with SV-eQTLs' associated test with gene expression values
Deletions
gene	INFO_ID	NA18534	NA18939	NA19036	NA19240	NA19650	NA19983	NA20509	NA20847	HG00096	HG00171	HG00514	HG00733	HG00864	HG01114	HG01505	HG01573	HG01596	HG02011	HG02018	HG02492	HG02587	HG03009	HG03065	HG03371	HG03683	HG03732	pvalue_0_1	qvalue
ITGB3BP	chr1-63444579-DEL-56	3.64668	4.02861	4.01464	3.66218	4.49078	4.23308	4.21359	4.08861	4.38927	3.92221	3.56543	3.69036	3.97872	4.10199	3.98228	4.26554	4.18029	3.89901	3.84004	4.14168	4.54624	4.15875	3.86107	4.61714	4.10366	4.43127	0.428549	0.428549
ZNF502	chr3-44510750-DEL-50	0.505437	0.711072	1.16934	0.680864	0.703322	0.658127	0.429553	0.838574	1.1641	1.13012	0.171685	1.32935	0.564333	0.454587	1.00824	1.82615	0.138858	0.409951	0.584878	0.825207	0.906216	1.2783	0.618792	0.891358	1.55315	0.709215	0.0014681	0.00440429
LOC105377056	chr3-44510750-DEL-50	0.0515847	0.259984	0.24882	0.200549	0.133223	0.102748	0.153295	0.211812	0.0436047	0.395408	0.0914977	0.593296	0.118553	0.143066	0.342175	0.53026	0.0255186	0.109707	0.112703	0.189359	0.349621	0.228916	0.0916985	0.161873	0.339314	0.184628	0.00337054	0.00505581
ZNF852	chr3-44510750-DEL-50	3.27757	3.40615	3.68643	3.0715	3.23011	3.51012	3.37508	3.67136	3.44721	3.65897	2.6969	3.13264	3.83927	2.92203	2.79273	3.07487	3.18586	3.58965	3.45265	2.96908	3.258	3.45068	3.82122	3.17936	3.71417	3.27839	0.882274	0.882274
TMEM150C	chr4-82474356-DEL-321	0.0918362	0.508127	0.307329	0.412162	0.340342	0.67871	0.614028	0.190464	0.246862	0.36372	0.354217	0.618256	0.370713	1.09615	0.301791	0.314429	0.402944	0.0768346	0.253294	0.313552	0.0816796	0.643493	0.429698	0.0418527	0.651803	0.618386	0.351706	0.351706
SLC35A1	chr6-87408456-DEL-133	4.09134	3.96346	4.25039	4.18295	4.04108	4.35418	4.06881	4.3855	4.03268	4.2206	4.22083	4.19291	4.48474	4.09492	4.14323	4.46911	3.82772	3.98884	3.83711	3.82111	4.18232	4.52345	4.07898	4.17672	4.43945	4.04595	0.704507	0.704507
GRM8	chr7-126657145-DEL-70	0.514823	0.731901	0.682338	0.253319	0.724139	0.966824	0.367965	1.35338	0.620768	0.299109	0.162468	0.942694	1.38041	1.12999	0.599893	0.122852	0.516968	0.258357	1.24431	0.329619	0.258644	0.399478	1.02615	0.267508	0.830825	0.501271	0.42903	0.42903
XKR9	chr8-70671321-DEL-1088	0.230725	0.0789015	0.301779	0.267848	0.270861	0.136379	0.530737	0.218365	0.579581	0.80411	0.121598	0.69051	0.195844	0.504393	0.102031	0.128661	0.129104	0.446265	0.214502	0.225182	0.273766	0.139141	0.287291	0.175466	0.46309	0.130936	4.04e-05	0.00012115
ERICH1	chr8-644401-DEL-5014	1.74803	2.39738	1.67257	2.07912	1.95939	1.97346	2.23384	2.59605	2.2522	2.07933	2.28958	2.55232	2.34662	2.5533	1.99451	2.2193	2.04547	1.90066	1.92946	1.8503	1.79807	2.06147	1.68038	1.86154	2.31917	2.23454	0.00012162	0.00012162
LACTB2-AS1	chr8-70671321-DEL-1088	0.28126	0.747766	0.767221	0.630501	0.505454	0.615394	0.582245	0.804946	0.770581	0.637258	0.586462	0.892929	0.726417	0.987291	0.540901	0.502549	0.611283	0.74751	0.558708	0.608649	0.527226	0.495588	0.842963	0.300785	1.05231	0.68865	0.667254	0.667254
LOC105375798	chr8-143618315-DEL-14208	0.440111	0.715646	0.590923	0.477315	0.521632	0.464308	0.444294	0.694049	0.539899	0.746252	0.618093	0.789651	0.705868	0.643124	0.636834	1.07418	0.580056	0.633124	0.593224	0.627197	0.435011	0.531156	0.619231	0.249734	0.893681	0.700195	0.879847	0.879847
LACTB2	chr8-70671321-DEL-1088	3.93393	4.05628	4.27594	3.24684	4.45658	4.59855	4.27197	4.1858	4.79205	4.4518	3.26269	3.39421	4.31971	3.78727	3.5627	3.98031	4.31199	4.31699	3.96672	4.04723	4.40307	4.27337	4.04042	4.43626	4.2567	4.50078	0.273981	0.410971
LOC105378309	chr10-53023782-DEL-5287	0	0.0204374	0	0	0	0	0	0.041445	0	0	0	0	0.00932221	0.0225901	0.00669271	0.00867984	0.0535572	0.316367	0.017637	0	0.0163475	0.0346317	0.0448963	0	0.0112164	0	0.074951	0.074951
RPL17-C18orf32	chr18-49493482-DEL-322	0.567425	0.559495	0.214836	0.166291	0.425751	0.224864	0.426275	0.413386	0.353499	0.194666	0.100051	0.194077	0.541147	0.361187	0.271835	0.0724869	0.410258	0.65357	0.225536	0.294691	0.523937	0.477009	0.194022	0.115092	0.0627154	0.413274	0.208741	0.279225
SNORD58A	chr18-49493482-DEL-322	5.29513	5.53516	6.19238	6.08099	5.61922	5.45814	5.56034	5.39865	5.48944	5.37428	6.14564	6.1298	5.34168	6.2488	5.66634	6.10937	5.62239	5.63369	4.90099	5.64084	5.38293	5.80373	5.41263	5.73315	5.99001	5.52577	0.279225	0.279225
CPNE1	chr20-35960724-DEL-60	6.34898	6.0101	6.06918	5.42314	5.96745	6.08829	6.10954	5.98862	6.72877	5.92945	5.15323	5.18791	6.1428	5.39288	5.72292	5.8173	5.98007	6.16833	5.78987	6.11769	5.91867	6.17741	5.95375	5.44866	5.22544	5.13264	0.108558	0.108558
Insertions
gene	INFO_ID	NA18534	NA18939	NA19036	NA19240	NA19650	NA19983	NA20509	NA20847	HG00096	HG00171	HG00514	HG00733	HG00864	HG01114	HG01505	HG01573	HG01596	HG02011	HG02018	HG02492	HG02587	HG03009	HG03065	HG03371	HG03683	HG03732	pvalue_0_1	qvalue
CCDC163	chr1-45497763-INS-354	2.45195	2.138	2.80731	1.61381	2.67117	2.30225	2.0888	2.48176	2.61654	2.9133	1.15317	1.76539	2.48915	2.02237	2.4393	2.32049	2.64138	2.62909	2.67738	2.59695	2.67836	2.70554	1.965	2.04724	2.47609	2.71801	0.0127717	0.038315
TESK2	chr1-45497763-INS-354	3.72756	3.23298	3.77611	2.97257	2.95979	2.9844	3.07023	3.65321	3.29935	3.1272	3.01144	2.83746	3.36106	3.11416	3.03218	2.74893	3.05962	3.43118	3.11739	3.18382	3.84149	3.13031	2.86341	3.24466	3.32353	3.26923	0.0414462	0.0537162
TMEM69	chr1-45497763-INS-354	5.31216	5.35683	5.56342	5.26365	5.60295	5.65957	5.67324	5.64913	5.97743	5.48924	5.03285	4.72075	5.75588	4.82068	4.94332	5.20731	5.90924	5.80096	5.3165	5.6145	5.70931	5.88852	5.58336	6.14517	5.67817	5.56688	0.0537162	0.0537162
TTLL4	chr2-218711871-INS-333	3.54441	3.56157	3.14133	3.38411	3.85781	3.89286	3.65699	3.78342	3.93395	3.57073	3.68447	3.48969	3.53872	3.96951	3.26142	3.63013	3.98938	3.23309	3.37353	3.66485	3.52826	3.69452	3.34596	3.6403	3.61172	3.90347	0.281188	0.281188
BAZ2B	chr2-159519810-INS-159	3.00047	3.25699	3.32508	3.61413	1.74825	2.74887	2.6845	2.94203	3.31112	3.20085	3.26402	3.14497	3.17853	2.85378	2.92582	3.24253	2.95751	3.56123	2.23019	3.10532	3.46241	2.77622	2.67529	3.43129	3.21011	2.88733	0.312319	0.312319
CMSS1	chr3-99936541-INS-328	3.98055	3.61247	3.3894	3.19673	3.97192	4.11536	3.99902	3.60984	4.44999	3.70182	3.46724	2.78522	3.94605	3.2388	3.21063	4.15779	4.16544	3.69401	3.54339	3.88371	3.93019	4.08586	3.23886	4.22312	3.9702	3.83063	0.0638462	0.191538
FILIP1L	chr3-99936541-INS-328	2.05228	2.12399	1.5626	2.55874	2.07102	2.4436	2.45931	2.90256	3.45248	2.69077	3.08118	2.95493	2.18616	3.16907	2.01857	2.50654	2.07117	2.6468	2.49921	2.18833	2.13865	2.25397	1.34248	2.06363	2.48166	2.04838	0.275385	0.275385
LNP1	chr3-99936541-INS-328	2.62675	2.30104	2.57711	2.03812	2.42853	2.89766	2.46846	2.12639	2.71406	2.45691	2.04197	1.97889	2.71609	2.39809	2.29103	2.84024	2.45162	2.63554	2.57638	2.3098	2.20383	2.31742	2.44984	2.20345	2.73492	2.42133	0.241538	0.275385
SCAMP1-AS1	chr5-78358346-INS-319	3.15937	3.08499	3.41387	2.35359	2.75282	3.15989	2.4768	2.83608	3.33841	2.93283	2.23578	2.82869	3.40184	2.8129	2.2846	2.85377	2.436	2.72635	2.49064	2.86484	2.55602	3.04476	3.40082	2.67956	2.98028	2.67249	0.180439	0.180439
SCAPER	chr15-76198866-INS-67	2.73273	2.45051	2.4129	2.56122	2.47386	2.41328	2.50199	2.9628	2.56566	2.78567	2.24128	2.83587	2.78891	2.94974	2.26613	2.59523	2.09273	2.66384	2.60316	1.97003	2.2105	2.36937	2.15192	1.86171	2.55522	2.63028	0.0315559	0.0315559
ZNF793	chr19-37789443-INS-1092	0.998759	1.66124	1.85186	1.32091	0.688729	1.90107	1.11693	1.02714	1.21966	1.08149	0.944442	0.991522	1.31225	0.632209	0.917464	1.80745	1.26322	1.20222	0.589053	1.22379	1.48473	1.02608	0.387105	1.88905	1.82936	2.13023	0.622736	0.622736
ZFP30	chr19-37789443-INS-1092	2.84184	2.75061	3.0096	2.52442	2.80727	2.73255	2.81978	3.04385	3.30012	2.71814	2.36506	2.65712	3.11363	2.27262	2.30068	2.80997	2.35655	3.12849	2.36168	2.92487	3.25587	2.94638	2.87714	2.97743	3.14896	2.88073	0.0604465	0.120893
PNMA8B	chr19-46509020-INS-311	0.0114104	0.0417585	0.00716231	0.00693615	0.0767188	0	0.0105451	0.034211	0.0191851	0.0174782	0	0.0215961	0.0115049	0.00467905	0.00826147	0.0213463	0.0369614	0.0176513	0.0072871	0.0404136	0.010117	0.0391466	0.00374991	0	0.0229942	0.0177911	0.321727	0.321727
DUSP15	chr20-31730454-INS-1425	0.267976	0.152504	0.0787395	0.0486645	0.0294428	0.0874904	0.0892641	0.0798946	0.0414086	0.181778	0.0307824	0.0507277	0.118349	0.0652276	0.0889457	0.0377726	0.115206	0.225792	0.18673	0.108063	0.198497	0.221736	0.168017	0.247375	0.0326277	0.110358	0.420968	0.420968
