# Supplementary material for: An integrative TAD catalog in lymphoblastoid cell lines discloses the functional impact of deletions and insertions in human genomes
Source: HighWire-hosted journal article supplement (doi:10.1101/gr.279419.124), 2024-12-01
Supplement: Supplemental_Table_S10.xlsx [file Supplemental_Table_S10.xlsx]

## Sheet: Table S11
Table S10. Summary statistics of the TAD-SVs that overlapped with SV-sQTLs' associated test with gene splicing ratios
Deletions
feature_id	INFO_ID	NA18534	NA18939	NA19036	NA19240	NA19650	NA19983	NA20509	NA20847	HG00096	HG00171	HG00514	HG00733	HG00864	HG01114	HG01505	HG01573	HG01596	HG02011	HG02018	HG02492	HG02587	HG03009	HG03065	HG03371	HG03683	HG03732	pvalue_0_1	qvalue
1:63486773:63490083:clu_29045_-	chr1-63444579-DEL-56	0.283486	-1.84594	-1.38755	1.39895	-1.59055	-0.592523	-0.253364	0.539492	-0.0835432	1.14636	2.11552	1.30195	-1.93118	1.81788	-1.50039	1.40937	-0.386135	0.592421	0.233656	-2.17845	-1.12048	0.140028	0.0326959	-1.88956	-1.49196	0.325339	0.177243	0.177243
6:87391835:87392725:clu_24429_+	chr6-87408456-DEL-133	-0.936183	0.0123479	1.07631	2.1583	-0.932265	0.412867	-0.841126	-0.767154	0.562549	0.0191374	-0.627627	1.20783	2.16516	-0.33572	-0.512317	1.60925	2.54334	-0.708359	0.0362337	-1.04076	-1.14138	0.385166	-0.996222	-1.15969	0.681233	-0.554325	0.014847	0.014847
7:2235564:2239418:clu_36460_-	chr7-2225230-DEL-60	-0.773481	0.259054	-0.673531	-0.473234	0.939102	0.399567	-0.254454	0.143982	-1.13462	1.78867	0.719822	-0.675079	-1.77511	-1.00243	0.538211	0.294961	0.47733	1.41815	-0.857731	0.430241	0.466682	1.13247	0.0958782	1.28634	1.153	2.20548	0.113077	0.226154
7:2235564:2238015:clu_36460_-	chr7-2225230-DEL-60	1.16564	-1.39039	-0.384425	-0.454952	-0.488396	0.28787	-0.331725	0.31875	1.5742	-1.30221	-0.801903	0.606824	1.5925	0.32731	-0.997168	0.269603	-0.456201	-1.81504	0.246548	-0.344128	-0.02048	-0.861933	0.0804627	-0.422569	-0.707499	-1.79066	0.540769	0.540769
8:70669538:70674818:clu_22301_+	chr8-70671321-DEL-1088	-0.0059803	-0.950419	-0.39955	-0.929802	2.01342	-1.22776	2.06943	-1.07784	1.31972	1.64231	0.333125	0.5051	-1.20383	1.51086	-0.365966	-0.762884	-1.01716	-0.780188	-1.21529	-0.646946	1.77351	-1.18727	0.00994081	1.33476	0.612355	-0.937157	0.00024416	0.00036624
8:664676:668598:clu_8652_-	chr8-644401-DEL-5014	1.24546	-0.414052	1.21778	-0.759694	1.20929	1.13129	-0.186955	0.427311	0.216711	-0.715791	0.872046	-1.94336	-0.991152	-1.63439	-0.645591	0.436654	1.04318	0.134623	0.345217	1.37016	1.42313	0.506337	1.3933	0.331152	0.336981	0.661554	0.012405	0.037215
8:70652752:70653695:clu_22301_+	chr8-70671321-DEL-1088	0.704935	1.30539	0.883035	0.859624	-1.80869	0.580523	-2.48375	0.948607	-1.97327	-1.8257	1.12868	0.267389	1.13345	-1.57485	0.266203	1.1734	1.25105	-0.185246	0.328117	0.560184	-1.19698	0.807123	-0.0606761	-0.594006	0.0574263	0.818711	0.00013999	0.00036624
8:640834:668598:clu_8652_-	chr8-644401-DEL-5014	-1.33125	1.22196	-1.4756	0.898362	-1.55711	-1.49841	0.0613296	0.288855	0.635482	0.816366	-0.256177	1.19119	1.20511	1.12714	0.0585172	-0.635507	-0.610807	0.414936	0.447919	-1.57724	-1.6308	-0.181406	-1.5528	-0.199111	-0.0102558	-0.255825	0.0409243	0.0613864
8:70652752:70674818:clu_22301_+	chr8-70671321-DEL-1088	-0.807817	-1.10851	-1.29185	-0.198083	-0.627174	0.125329	0.590269	-0.457157	1.30965	0.292661	0.754102	-1.32381	-1.13029	0.663405	0.442659	-0.975022	-1.26481	1.83301	0.648585	-0.0006443	-0.305015	-0.0870021	0.0905169	-0.570061	-1.26685	0.181843	1	1
8:640834:655451:clu_8652_-	chr8-644401-DEL-5014	-1.11403	-0.706673	-1.25632	1.16766	-1.36015	-1.27491	0.72446	-0.953779	-1.46964	1.19651	-1.24532	2.2206	0.327811	0.733921	1.01688	0.983511	-1.34383	-0.855612	-1.29331	-1.42779	-1.3354	-1.41943	-1.33112	-0.126074	-0.0204037	-0.0308668	0.25035	0.25035
20:35632923:35664760:clu_21372_-	chr20-35960724-DEL-60	1.74617	0.529841	0.298889	-0.216541	-0.391229	0.191113	0.0144534	-0.368097	0.3368	-0.0640161	-0.44147	-0.241749	0.440355	-0.503521	0.525605	0.455731	-0.287251	1.36669	-0.306092	-0.0280025	-0.167166	-0.169622	-0.432385	-0.916697	-0.475933	-0.963485	0.0204189	0.0255237
20:35655344:35658930:clu_21372_-	chr20-35960724-DEL-60	-2.66674	-0.1131	-0.0479149	0.324691	0.682168	0.111165	0.232633	0.199351	-0.366086	0.0756577	0.587792	0.0153259	-0.615657	0.625111	-0.328198	-0.84565	0.819914	-0.019236	0.522568	0.629328	0.722698	0.518111	0.397488	0.963883	0.527364	1.15046	0.0315559	0.0315559
20:35632923:35658930:clu_21372_-	chr20-35960724-DEL-60	0.152098	0.418184	0.353582	0.0317102	-0.009831	1.00881	0.817291	-0.411666	-0.837659	0.0738244	-0.126864	1.31861	-0.501478	0.529499	1.17006	-1.23701	-0.464932	1.04	0.128767	0.239788	-0.015342	0.578768	-0.0509546	-2.05641	-0.244741	-1.08966	0.00770059	0.0192515
20:35626381:35626735:clu_21369_-	chr20-35960724-DEL-60	-0.432567	0.0365434	-0.758824	0.380615	0.448366	-0.411455	0.123351	0.158921	-0.47193	-0.489007	0.142723	-0.876845	-0.264312	-0.471092	-1.1168	-0.07634	0.00231816	0.118498	-0.0120962	0.846607	0.0663234	0.321752	0.0414382	0.769644	0.496257	0.992429	0.00770059	0.0192515
20:35626381:35626567:clu_21369_-	chr20-35960724-DEL-60	0.548644	0.0262163	0.522271	-0.0708763	-0.411626	0.380335	-0.27186	-0.0914839	0.483738	0.420867	-0.190571	0.69705	0.130736	0.265358	0.713292	0.415219	0.324432	0.172651	0.48457	-0.176643	0.101298	-0.0410546	-0.358616	-0.959188	0.294405	-1.34658	0.0127717	0.0212861
Insertions
feature_id	INFO_ID	NA18534	NA18939	NA19036	NA19240	NA19650	NA19983	NA20509	NA20847	HG00096	HG00171	HG00514	HG00733	HG00864	HG01114	HG01505	HG01573	HG01596	HG02011	HG02018	HG02492	HG02587	HG03009	HG03065	HG03371	HG03683	HG03732	pvalue_0_1	qvalue
1:45495166:45499345:clu_28892_-	chr1-45497763-INS-354	-0.584336	-0.690839	-0.870622	-0.328232	-0.916103	0.852304	1.00983	0.325025	0.52802	0.46688	0.417361	-0.0758602	-0.70905	-0.43326	-0.255925	1.04261	-0.894569	-0.714337	-0.833058	-0.815077	0.389508	-0.812819	-0.485895	-0.710008	0.476267	-0.182443	0.798805	0.798805
1:45495545:45499345:clu_28892_-	chr1-45497763-INS-354	-0.494622	0.399963	0.206488	2.15295	0.256737	0.122463	0.18343	-1.07719	-0.581156	0.645504	0.599063	-0.646	1.59738	-0.786766	0.120775	-0.45301	0.0685585	0.596656	0.339627	-0.44869	-1.21106	-0.740054	-0.926154	1.99068	-0.401448	-0.0372532	0.0972623	0.21884
1:45495166:45496556:clu_28892_-	chr1-45497763-INS-354	-0.0973575	0.798389	0.295351	-0.274953	0.299073	0.0537545	-0.131064	-0.416363	-0.272238	0.169442	0.00379653	-0.385418	-0.665686	-0.246195	-0.142387	0.0973352	1.07306	-0.276865	0.627438	-0.16283	-1.27856	-0.814071	0.670716	0.499751	-1.26252	0.616364	0.0315559	0.142002
1:45551155:45561789:clu_13870_+	chr1-45497763-INS-354	-1.65831	0.338599	0.901746	-0.0883704	0.246304	0.614062	0.506154	-0.89883	1.40053	-1.24228	-0.481572	-1.34872	1.48164	-0.1669	0.728616	-0.396617	-0.345471	0.413395	0.893262	-1.12611	-1.61519	0.834473	0.313306	0.199494	-0.0089016	0.237625	0.356549	0.534824
1:45551155:45552436:clu_13870_+	chr1-45497763-INS-354	-1.74648	0.475494	-0.0782115	-0.445241	-0.698239	-2.57892	0.338158	1.01339	-0.574092	0.996793	0.536873	0.958206	-0.57979	0.0716316	-1.05433	-0.628239	0.781793	0.299322	-0.391775	0.861487	0.718653	-0.177377	-0.359558	-0.607451	0.442949	-0.515916	0.0008224	0.00740161
1:45497383:45498443:clu_28892_-	chr1-45497763-INS-354	-0.358158	-0.254775	-0.421526	0.117849	-0.478358	-0.304789	-0.265716	-0.296485	-0.492929	0.747192	0.965159	0.41892	-0.295049	0.0310697	-0.414728	-0.18357	-0.429635	-0.458144	-0.411745	1.06123	0.162753	0.494036	-0.120517	-0.349792	-0.1514	0.222858	0.759662	0.798805
1:45329437:45330516:clu_28882_-	chr1-45497763-INS-354	-0.0101257	-0.532283	0.114476	-0.232161	0.617168	0.0567839	-1.8209	-0.216109	0.439854	0.100393	-0.522721	0.0323449	-0.0962659	0.576924	0.395834	-0.603638	-0.16264	0.59196	0.606588	-0.385492	-0.331452	0.574097	-0.19664	0.200069	-0.238301	0.00248673	0.759662	0.798805
1:45496623:45499345:clu_28892_-	chr1-45497763-INS-354	0.415746	0.319724	-0.319892	0.227263	0.552086	0.569951	-1.45671	-0.255958	0.0313342	0.102947	0.309006	-1.04703	-0.241934	-0.74307	-0.485387	-0.149284	-0.276344	-0.30163	0.335349	-0.548836	-0.546858	0.753355	0.953421	0.760929	0.319862	0.171306	0.0868905	0.21884
1:45329437:45329889:clu_28882_-	chr1-45497763-INS-354	0.619638	0.544853	-0.370871	0.43357	-1.17882	-0.454895	1.36494	0.360149	-1.05866	0.268921	1.05846	-0.295574	0.709996	-1.04516	-0.485708	0.70367	0.299062	-0.533303	-1.12577	0.522145	0.159057	-0.654819	0.598365	0.227618	-0.578998	0.352073	0.134106	0.241391
4:1347503:1348090:clu_40407_+	chr4-1283682-INS-140	0.132231	-0.874533	-0.984197	1.36926	1.73226	-0.936428	0.307477	0.640928	-1.00495	-1.0023	-0.966919	0.339404	-0.988214	1.12369	-1.01137	0.547393	-1.01834	-0.979052	1.06492	1.17136	-1.04448	1.3725	-0.945094	-0.629945	0.397102	0.424815	0.0568071	0.0568071
15:76292700:76311350:clu_2802_-	chr15-76198866-INS-67	-0.833786	-0.62786	-0.121878	0.489506	0.0302432	-1.87447	-0.54422	-0.717972	0.106052	0.912909	-0.463577	-0.454358	-0.660607	1.21285	-0.442947	0.438258	1.41645	-0.200293	1.29535	0.921223	-1.00226	0.446997	-0.318642	-2.65492	0.753506	0.114923	0.0537162	0.0537162
19:37507047:37508265:clu_27679_+	chr19-37789443-INS-1092	-0.422718	0.996525	1.16693	1.74005	-1.49107	1.27422	-1.43701	-1.29986	-0.0197065	-1.50204	1.75438	-1.17939	-0.229968	0.488043	0.980819	-1.06366	0.701475	1.30822	0.340187	-1.42146	-1.30793	-1.4192	-0.70546	2.31707	-1.44003	2.42994	0.0122329	0.0366987
19:37476434:37483879:clu_27679_+	chr19-37789443-INS-1092	0.930236	0.156171	-0.0499078	-0.602873	0.725198	-0.58195	0.669874	1.32495	0.672205	0.477631	-1.2777	0.324167	0.650253	0.699337	-1.14563	-1.35799	0.347396	0.00744218	0.650689	0.512994	0.353345	0.738536	1.16845	-1.79174	0.230506	-1.66757	0.240562	0.240562
19:37506966:37508265:clu_27679_+	chr19-37789443-INS-1092	-0.979128	-0.0706396	-0.223306	0.464992	-0.226925	-1.22119	0.261882	0.507532	-0.743152	0.543089	-0.0060234	1.54937	-1.13925	-0.994852	0.466128	2.23504	-1.28135	-0.273729	-0.429555	0.628614	0.69927	0.0691089	-1.07588	-1.01731	2.13538	-0.967641	0.0356019	0.0534029
