# Supplementary material for: An integrative TAD catalog in lymphoblastoid cell lines discloses the functional impact of deletions and insertions in human genomes
Source: HighWire-hosted journal article supplement (doi:10.1101/gr.279419.124), 2024-12-01
Supplement: Supplemental_Table_S11.xlsx [file Supplemental_Table_S11.xlsx]

## Sheet: Table S12
Table S11. Summary statistics of the causal mediation analysis for the TAD-SV-eQTLs
Deletions
gene	INFO_ID	NA18534	NA18939	NA19036	NA19240	NA19650	NA19983	NA20509	NA20847	HG00096	HG00171	HG00514	HG00733	HG00864	HG01114	HG01505	HG01573	HG01596	HG02011	HG02018	HG02492	HG02587	HG03009	HG03065	HG03371	HG03683	HG03732	pval_ACME	pval_ADE	pval_Total
ZNF502	chr3-44510750-DEL-50	0.505437	0.711072	1.16934	0.680864	0.703322	0.658127	0.429553	0.838574	1.1641	1.13012	0.171685	1.32935	0.564333	0.454587	1.00824	1.82615	0.138858	0.409951	0.584878	0.825207	0.906216	1.2783	0.618792	0.891358	1.55315	0.709215	0.514	0.002	0
LOC105377056	chr3-44510750-DEL-50	0.0515847	0.259984	0.24882	0.200549	0.133223	0.102748	0.153295	0.211812	0.0436047	0.395408	0.0914977	0.593296	0.118553	0.143066	0.342175	0.53026	0.0255186	0.109707	0.112703	0.189359	0.349621	0.228916	0.0916985	0.161873	0.339314	0.184628	0.314	0	0
XKR9	chr8-70671321-DEL-1088	0.230725	0.0789015	0.301779	0.267848	0.270861	0.136379	0.530737	0.218365	0.579581	0.80411	0.121598	0.69051	0.195844	0.504393	0.102031	0.128661	0.129104	0.446265	0.214502	0.225182	0.273766	0.139141	0.287291	0.175466	0.46309	0.130936	0.338	0	0.002
ERICH1	chr8-644401-DEL-5014	1.74803	2.39738	1.67257	2.07912	1.95939	1.97346	2.23384	2.59605	2.2522	2.07933	2.28958	2.55232	2.34662	2.5533	1.99451	2.2193	2.04547	1.90066	1.92946	1.8503	1.79807	2.06147	1.68038	1.86154	2.31917	2.23454	0.904	0	0.002
Insertions
gene	INFO_ID	NA18534	NA18939	NA19036	NA19240	NA19650	NA19983	NA20509	NA20847	HG00096	HG00171	HG00514	HG00733	HG00864	HG01114	HG01505	HG01573	HG01596	HG02011	HG02018	HG02492	HG02587	HG03009	HG03065	HG03371	HG03683	HG03732	pval_ACME	pval_ADE	pval_Total
CCDC163	chr1-45497763-INS-354	2.45195	2.138	2.80731	1.61381	2.67117	2.30225	2.0888	2.48176	2.61654	2.9133	1.15317	1.76539	2.48915	2.02237	2.4393	2.32049	2.64138	2.62909	2.67738	2.59695	2.67836	2.70554	1.965	2.04724	2.47609	2.71801	0.248	0.002	0.022
SCAPER	chr15-76198866-INS-67	2.73273	2.45051	2.4129	2.56122	2.47386	2.41328	2.50199	2.9628	2.56566	2.78567	2.24128	2.83587	2.78891	2.94974	2.26613	2.59523	2.09273	2.66384	2.60316	1.97003	2.2105	2.36937	2.15192	1.86171	2.55522	2.63028	0.086	0.226	0.024
