# Supplementary material for: An integrative TAD catalog in lymphoblastoid cell lines discloses the functional impact of deletions and insertions in human genomes
Source: HighWire-hosted journal article supplement (doi:10.1101/gr.279419.124), 2024-12-01
Supplement: Supplemental_Table_S12.xlsx [file Supplemental_Table_S12.xlsx]

## Sheet: Table S13
Table S12. Summary statistics of the causal mediation analysis for the TAD-SV-sQTLs
Deletions
feature_id	INFO_ID	NA18534	NA18939	NA19036	NA19240	NA19650	NA19983	NA20509	NA20847	HG00096	HG00171	HG00514	HG00733	HG00864	HG01114	HG01505	HG01573	HG01596	HG02011	HG02018	HG02492	HG02587	HG03009	HG03065	HG03371	HG03683	HG03732	pval_ACME	pval_ADE	pval_Total
6:87391835:87392725:clu_24429_+	chr6-87408456-DEL-133	-0.936183	0.0123479	1.07631	2.1583	-0.932265	0.412867	-0.841126	-0.767154	0.562549	0.0191374	-0.627627	1.20783	2.16516	-0.33572	-0.512317	1.60925	2.54334	-0.708359	0.0362337	-1.04076	-1.14138	0.385166	-0.996222	-1.15969	0.681233	-0.554325	0.736	0.008	0.002
8:70669538:70674818:clu_22301_+	chr8-70671321-DEL-1088	-0.0059803	-0.950419	-0.39955	-0.929802	2.01342	-1.22776	2.06943	-1.07784	1.31972	1.64231	0.333125	0.5051	-1.20383	1.51086	-0.365966	-0.762884	-1.01716	-0.780188	-1.21529	-0.646946	1.77351	-1.18727	0.00994081	1.33476	0.612355	-0.937157	0.498	0	0
8:664676:668598:clu_8652_-	chr8-644401-DEL-5014	1.24546	-0.414052	1.21778	-0.759694	1.20929	1.13129	-0.186955	0.427311	0.216711	-0.715791	0.872046	-1.94336	-0.991152	-1.63439	-0.645591	0.436654	1.04318	0.134623	0.345217	1.37016	1.42313	0.506337	1.3933	0.331152	0.336981	0.661554	0.304	0.222	0.026
8:70652752:70653695:clu_22301_+	chr8-70671321-DEL-1088	0.704935	1.30539	0.883035	0.859624	-1.80869	0.580523	-2.48375	0.948607	-1.97327	-1.8257	1.12868	0.267389	1.13345	-1.57485	0.266203	1.1734	1.25105	-0.185246	0.328117	0.560184	-1.19698	0.807123	-0.0606761	-0.594006	0.0574263	0.818711	0.884	0	0
20:35632923:35664760:clu_21372_-	chr20-35960724-DEL-60	1.74617	0.529841	0.298889	-0.216541	-0.391229	0.191113	0.0144534	-0.368097	0.3368	-0.0640161	-0.44147	-0.241749	0.440355	-0.503521	0.525605	0.455731	-0.287251	1.36669	-0.306092	-0.0280025	-0.167166	-0.169622	-0.432385	-0.916697	-0.475933	-0.963485	0.786	0.024	0.024
20:35655344:35658930:clu_21372_-	chr20-35960724-DEL-60	-2.66674	-0.1131	-0.0479149	0.324691	0.682168	0.111165	0.232633	0.199351	-0.366086	0.0756577	0.587792	0.0153259	-0.615657	0.625111	-0.328198	-0.84565	0.819914	-0.019236	0.522568	0.629328	0.722698	0.518111	0.397488	0.963883	0.527364	1.15046	0.796	0.12	0.084
20:35632923:35658930:clu_21372_-	chr20-35960724-DEL-60	0.152098	0.418184	0.353582	0.0317102	-0.009831	1.00881	0.817291	-0.411666	-0.837659	0.0738244	-0.126864	1.31861	-0.501478	0.529499	1.17006	-1.23701	-0.464932	1.04	0.128767	0.239788	-0.015342	0.578768	-0.0509546	-2.05641	-0.244741	-1.08966	0.948	0.008	0.014
20:35626381:35626735:clu_21369_-	chr20-35960724-DEL-60	-0.432567	0.0365434	-0.758824	0.380615	0.448366	-0.411455	0.123351	0.158921	-0.47193	-0.489007	0.142723	-0.876845	-0.264312	-0.471092	-1.1168	-0.07634	0.00231816	0.118498	-0.0120962	0.846607	0.0663234	0.321752	0.0414382	0.769644	0.496257	0.992429	0.552	0.026	0.012
20:35626381:35626567:clu_21369_-	chr20-35960724-DEL-60	0.548644	0.0262163	0.522271	-0.0708763	-0.411626	0.380335	-0.27186	-0.0914839	0.483738	0.420867	-0.190571	0.69705	0.130736	0.265358	0.713292	0.415219	0.324432	0.172651	0.48457	-0.176643	0.101298	-0.0410546	-0.358616	-0.959188	0.294405	-1.34658	0.66	0.012	0.008
Insertions
feature_id	INFO_ID	NA18534	NA18939	NA19036	NA19240	NA19650	NA19983	NA20509	NA20847	HG00096	HG00171	HG00514	HG00733	HG00864	HG01114	HG01505	HG01573	HG01596	HG02011	HG02018	HG02492	HG02587	HG03009	HG03065	HG03371	HG03683	HG03732	pval_ACME	pval_ADE	pval_Total
1:45551155:45552436:clu_13870_+	chr1-45497763-INS-354	-1.74648	0.475494	-0.0782115	-0.445241	-0.698239	-2.57892	0.338158	1.01339	-0.574092	0.996793	0.536873	0.958206	-0.57979	0.0716316	-1.05433	-0.628239	0.781793	0.299322	-0.391775	0.861487	0.718653	-0.177377	-0.359558	-0.607451	0.442949	-0.515916	0.452	0.002	0.002
19:37507047:37508265:clu_27679_+	chr19-37789443-INS-1092	-0.422718	0.996525	1.16693	1.74005	-1.49107	1.27422	-1.43701	-1.29986	-0.0197065	-1.50204	1.75438	-1.17939	-0.229968	0.488043	0.980819	-1.06366	0.701475	1.30822	0.340187	-1.42146	-1.30793	-1.4192	-0.70546	2.31707	-1.44003	2.42994	0.936	0.014	0.008
