# Supplementary material for: An integrative TAD catalog in lymphoblastoid cell lines discloses the functional impact of deletions and insertions in human genomes
Source: HighWire-hosted journal article supplement (doi:10.1101/gr.279419.124), 2024-12-01
Supplement: Supplemental_Table_S13.xlsx [file Supplemental_Table_S13.xlsx]

## Sheet: Table S14
Table S13. Summary statistics of the CTCF motif scanning result using MA0139.1
motif_id	motif_alt_id	sequence_name	start	stop	strand	score	p-value	q-value	matched_sequence
MA0139.1	CTCF	chr3-84900406-INS-15193	3532	3550	-	15.0656	2.7e-06	0.414	CTCCCAGTAGGGGTCGACA
MA0139.1	CTCF	chr4-189233218-INS-68	32	50	-	14.5902	3.52e-06	0.414	ACACCACCAGAGAGCACTA
MA0139.1	CTCF	chr7-55763041-INS-54332	4746	4764	+	12.8197	8.92e-06	0.414	TGAACACAAGGAGGTGCTG
MA0139.1	CTCF	chr3-84900406-INS-15193	5416	5434	+	12.6885	9.53e-06	0.414	AGGCCCCCAGATGGTGCAA
MA0139.1	CTCF	chr7-55763041-INS-54332	4776	4794	+	12.5902	1e-05	0.414	TGCCCAACAGAGGGCATGG
MA0139.1	CTCF	chr3-151664751-INS-10490	1377	1395	-	12.5574	1.02e-05	0.414	AGGGCTGCAGGTGGAGCTG
MA0139.1	CTCF	chr7-55763041-INS-54332	48280	48298	-	12.459	1.07e-05	0.414	GCGGCGCCAGGTGGCGGGG
MA0139.1	CTCF	chr7-55763041-INS-54332	29446	29464	-	12.3934	1.1e-05	0.414	GGGACACTAGGTGACAGAG
MA0139.1	CTCF	chr3-151664751-INS-10490	9268	9286	-	11.7705	1.5e-05	0.414	CACCCACCAGAAGGAAGAA
MA0139.1	CTCF	chr7-55763041-INS-54332	23939	23957	+	11.6721	1.57e-05	0.414	TACCCAGCAGATGGTGAGA
MA0139.1	CTCF	chr3-84900406-INS-15193	3439	3457	+	11.4426	1.75e-05	0.414	TCACCAGCAGAGGCTGCAG
MA0139.1	CTCF	chr7-55763041-INS-54332	52330	52348	-	11.2951	1.88e-05	0.414	GGGGCTGCAGAGGGTGGTG
MA0139.1	CTCF	chr7-55763041-INS-54332	41770	41788	+	11.1803	1.98e-05	0.414	GGCCCACAAGGTGAAACTA
MA0139.1	CTCF	chr7-55763041-INS-54332	41253	41271	-	11.1311	2.03e-05	0.414	GGACAACCAGAGGTCACTC
MA0139.1	CTCF	chr7-55763041-INS-54332	31489	31507	-	11.0164	2.14e-05	0.414	TCATCACCAGAGTGCAGCA
MA0139.1	CTCF	chr7-55763041-INS-54332	43549	43567	-	11.0164	2.14e-05	0.414	TGACCCGGAGGTGGCTGTA
MA0139.1	CTCF	chr7-55763041-INS-54332	14299	14317	+	10.9016	2.26e-05	0.414	TGGGCAACAGAGGGAGACC
MA0139.1	CTCF	chr7-55763041-INS-54332	47682	47700	-	10.7541	2.42e-05	0.414	CGGCCAGCGGGAGATGCCC
MA0139.1	CTCF	chr7-55763041-INS-54332	4628	4646	+	10.6557	2.53e-05	0.414	TGAACTCCAGGAGGCAAAA
MA0139.1	CTCF	chr7-55763041-INS-54332	53814	53832	-	10.6393	2.55e-05	0.414	AGACCACCTGAGGTCAGGA
MA0139.1	CTCF	chr7-55763041-INS-54332	43300	43318	-	10.2951	2.98e-05	0.459	TGTTCTGCAGGGGGAAATG
MA0139.1	CTCF	chr3-195622265-INS-103	44	62	+	10.1148	3.24e-05	0.459	TGGCCTCGGGGAGGTGCTG
MA0139.1	CTCF	chr7-55763041-INS-54332	12147	12165	-	10	3.41e-05	0.459	AGCCCAGAAGATGGAAGCT
MA0139.1	CTCF	chr3-84900406-INS-15193	14270	14288	-	9.96721	3.46e-05	0.459	CTACCACCAGATTGAACAG
MA0139.1	CTCF	chr7-55763041-INS-54332	52487	52505	-	9.91803	3.53e-05	0.459	TACTCAGGAGGTGGAGGCA
MA0139.1	CTCF	chr3-151664751-INS-10490	2283	2301	+	9.60656	4.06e-05	0.464	AACCCACCAGAAGGAAGAA
MA0139.1	CTCF	chr7-55763041-INS-54332	11104	11122	+	9.4918	4.27e-05	0.464	AACCCAGGAGGTGGAGGTT
MA0139.1	CTCF	chr7-55763041-INS-54332	45387	45405	-	9.4918	4.27e-05	0.464	AACCCAGGAGGTGGAGGTT
MA0139.1	CTCF	chr7-55763041-INS-54332	51154	51172	+	9.4918	4.27e-05	0.464	AACCCAGGAGGTGGAGGTT
MA0139.1	CTCF	chr7-55763041-INS-54332	2358	2376	+	9.36066	4.52e-05	0.464	CAGCAGCCAGGGGGTGCTT
MA0139.1	CTCF	chr7-55763041-INS-54332	24810	24828	+	9.21311	4.82e-05	0.464	ATGCCTCCATAGGGCAGTC
MA0139.1	CTCF	chr3-151664751-INS-10490	10045	10063	-	9.14754	4.96e-05	0.464	TCCCCTCTGGAGGACACTA
MA0139.1	CTCF	chr11-90259558-INS-30815	17429	17447	-	9.13115	4.99e-05	0.464	GGACCTGTAGTTGGAACCA
MA0139.1	CTCF	chr7-55763041-INS-54332	42658	42676	+	9.08197	5.1e-05	0.464	ACTCCAGCAGGGGCAACAA
MA0139.1	CTCF	chr7-55763041-INS-54332	8114	8132	-	8.86885	5.59e-05	0.464	AGGCCAGGAGTTGGAGGAG
MA0139.1	CTCF	chr11-90259558-INS-30815	17085	17103	+	8.86885	5.59e-05	0.464	TTTCAAGAAGGAGGCAGTG
MA0139.1	CTCF	chr7-55763041-INS-54332	28517	28535	-	8.83607	5.66e-05	0.464	GTGCCTCCAGGGTGCTCTG
MA0139.1	CTCF	chr3-151664751-INS-10490	1403	1421	+	8.78689	5.78e-05	0.464	GATCCACTGGGTGAAGCCA
MA0139.1	CTCF	chr3-84900406-INS-15193	5964	5982	+	8.65574	6.11e-05	0.464	TAACCTGCTGGGGTCAGGG
MA0139.1	CTCF	chr19-43329085-INS-5440	41	59	-	8.62295	6.2e-05	0.464	TGCCCACCAGAGAACAACC
MA0139.1	CTCF	chr3-151664751-INS-10490	423	441	-	8.57377	6.33e-05	0.464	CCAACTCCAGAGGTTGGTA
MA0139.1	CTCF	chr7-55763041-INS-54332	43347	43365	+	8.57377	6.33e-05	0.464	AGTCCAGAAGATGAAGGAA
MA0139.1	CTCF	chr7-55763041-INS-54332	48176	48194	-	8.47541	6.6e-05	0.464	GGGGCTGCAGCTGGCGCTG
MA0139.1	CTCF	chr11-90259558-INS-30815	16777	16795	+	8.39344	6.83e-05	0.464	TATTCTCCAGGGGAAGGTA
MA0139.1	CTCF	chr11-90259558-INS-30815	7597	7615	+	8.32787	7.02e-05	0.464	CCTCCAGCAGAAGCAGGCG
MA0139.1	CTCF	chr7-55763041-INS-54332	48282	48300	+	8.27869	7.16e-05	0.464	CCGCCACCTGGCGCCGCTC
MA0139.1	CTCF	chr3-195622265-INS-103	78	96	+	8.2459	7.26e-05	0.464	TGGCCTGGGGAAGGTGCTG
MA0139.1	CTCF	chr3-151664751-INS-10490	10048	10066	+	8.22951	7.31e-05	0.464	TGTCCTCCAGAGGGGAACT
MA0139.1	CTCF	chr7-55763041-INS-54332	37126	37144	-	8.21311	7.36e-05	0.464	CCATCAGCAAATGGCACTC
MA0139.1	CTCF	chr7-55763041-INS-54332	26157	26175	-	8.18033	7.46e-05	0.464	AGGTCAGGAGATGGAGACC
MA0139.1	CTCF	chr11-90259558-INS-30815	11835	11853	-	8.16393	7.51e-05	0.464	AAACCACAAGGAGATACCA
MA0139.1	CTCF	chr11-90259558-INS-30815	5057	5075	-	8.13115	7.62e-05	0.464	TAACCCCCAGATGGGGGAG
MA0139.1	CTCF	chr4-188504120-INS-783	632	650	+	8.06557	7.83e-05	0.464	TATCCAATAGGAGGTAATA
MA0139.1	CTCF	chr7-55763041-INS-54332	14498	14516	+	8.01639	7.99e-05	0.464	TTACCACATGGTGGAACAT
MA0139.1	CTCF	chr7-55763041-INS-54332	47073	47091	-	8	8.04e-05	0.464	GGATCACCTGAGGTCAGTA
MA0139.1	CTCF	chr3-84900406-INS-15193	12605	12623	-	7.95082	8.21e-05	0.464	GGGTCACCTGAGGTCGGGA
MA0139.1	CTCF	chr3-151664751-INS-10490	2111	2129	+	7.93443	8.26e-05	0.464	GAGCCAGTAGTGGTAACCC
MA0139.1	CTCF	chr7-55763041-INS-54332	25082	25100	+	7.90164	8.37e-05	0.464	AGATCACCTGAGGTCAGCA
MA0139.1	CTCF	chr4-1357005-INS-82	50	68	-	7.81967	8.66e-05	0.464	TAACCAGCTGGAGGGGCCC
MA0139.1	CTCF	chr3-145272499-INS-8632	5692	5710	+	7.80328	8.72e-05	0.464	CCACCACCTGAGGTCCCAA
MA0139.1	CTCF	chr7-55763041-INS-54332	48360	48378	-	7.80328	8.72e-05	0.464	TGGCCGTCAGAGGTCAAAC
MA0139.1	CTCF	chr3-151664751-INS-10490	1193	1211	-	7.70492	9.08e-05	0.475	GCCCCACAGGAAGGCAGCC
MA0139.1	CTCF	chr11-90259558-INS-30815	7465	7483	+	7.54098	9.7e-05	0.492	CATCCATCAGGGTGAGCTG
MA0139.1	CTCF	chr7-55763041-INS-54332	29326	29344	+	7.54098	9.7e-05	0.492	AGGACACTGGAGGACAGGA
# The format of this file is described at https://meme-suite.org/meme/doc/fimo-output-format.html#tsv_results.
# fimo --oc . --verbosity 1 --bgfile TAD_INS_seq_true_pos_new_bg --thresh 1.0E-4 MA0139.1.meme TAD_INS_seq_true_pos_new.fa
