# Supplementary material for: An integrative TAD catalog in lymphoblastoid cell lines discloses the functional impact of deletions and insertions in human genomes
Source: HighWire-hosted journal article supplement (doi:10.1101/gr.279419.124), 2024-12-01
Supplement: Supplemental_Table_S14.xlsx [file Supplemental_Table_S14.xlsx]

## Sheet: Table S15
Table S14. Summary statistics of the CTCF motif scanning result using CTCFBSDB 2.0
motif_id	motif_alt_id	sequence_name	start	stop	strand	score	p-value	q-value	matched_sequence
MIT_LM23		chr7-55763041-INS-54332	4746	4765	+	17.816	4.16e-07	0.136	TGAACACAAGGAGGTGCTGG
MIT_LM2		chr4-189233218-INS-68	32	50	-	16.4172	1.25e-06	0.124	ACACCACCAGAGAGCACTA
MIT_LM23		chr3-84900406-INS-15193	5416	5435	+	15.4172	1.91e-06	0.312	AGGCCCCCAGATGGTGCAAG
EMBL_M1		chr7-55763041-INS-54332	48283	48296	+	15.8221	1.95e-06	0.407	CGCCACCTGGCGCC
MIT_LM2		chr7-55763041-INS-54332	31489	31507	-	15.2883	2.62e-06	0.124	TCATCACCAGAGTGCAGCA
MIT_LM7		chr3-151664751-INS-10490	1376	1395	-	15.1043	2.79e-06	0.402	AGGGCTGCAGGTGGAGCTGC
MIT_LM2		chr7-55763041-INS-54332	53814	53832	-	15.1656	2.83e-06	0.124	AGACCACCTGAGGTCAGGA
EMBL_M2		chr3-145272499-INS-8632	3083	3091	+	14.378	2.99e-06	0.486	GGAACTGCA
EMBL_M2		chr7-55763041-INS-54332	24000	24008	+	14.378	2.99e-06	0.486	GGAACTGCA
MIT_LM7		chr7-55763041-INS-54332	48175	48194	-	14.8037	3.38e-06	0.402	GGGGCTGCAGCTGGCGCTGG
REN_20		chr7-55763041-INS-54332	48280	48299	-	8.27143	3.55e-06	0.514	AGCGGCGCCAGGTGGCGGGG
EMBL_M1		chr4-189233218-INS-68	35	48	+	14.8589	3.94e-06	0.407	TGCTCTCTGGTGGT
MIT_LM7		chr3-84900406-INS-15193	3439	3458	+	14.2822	4.69e-06	0.402	TCACCAGCAGAGGCTGCAGA
MIT_LM23		chr3-151664751-INS-10490	1376	1395	-	13.8221	4.92e-06	0.507	AGGGCTGCAGGTGGAGCTGC
REN_20		chr3-84900406-INS-15193	3438	3457	+	7.3	4.98e-06	0.514	ATCACCAGCAGAGGCTGCAG
MIT_LM7		chr7-55763041-INS-54332	23939	23958	+	14.1534	5.08e-06	0.402	TACCCAGCAGATGGTGAGAC
EMBL_M1		chr3-84900406-INS-15193	3535	3548	+	14.3067	5.77e-06	0.407	CGACCCCTACTGGG
MIT_LM2		chr7-55763041-INS-54332	45687	45705	+	14.0245	5.79e-06	0.124	GGATCACTTGAGGTCAGTA
EMBL_M1		chr7-55763041-INS-54332	23941	23954	-	14.2086	6.14e-06	0.407	CACCATCTGCTGGG
EMBL_M1		chr7-55763041-INS-54332	4778	4791	-	14.1718	6.3e-06	0.407	TGCCCTCTGTTGGG
MIT_LM2		chr7-55763041-INS-54332	47073	47091	-	13.8834	6.31e-06	0.124	GGATCACCTGAGGTCAGTA
MIT_LM7		chr7-55763041-INS-54332	37125	37144	-	13.7975	6.32e-06	10	CCATCAGCAAATGGCACTCA
REN_20		chr7-55763041-INS-54332	52330	52349	-	6.52857	6.58e-06	0.514	TGGGGCTGCAGAGGGTGGTG
MIT_LM2		chr7-55763041-INS-54332	25082	25100	+	13.7178	6.97e-06	0.124	AGATCACCTGAGGTCAGCA
MIT_LM2		chr7-55763041-INS-54332	41253	41271	-	13.5951	7.51e-06	0.124	GGACAACCAGAGGTCACTC
MIT_LM23		chr7-55763041-INS-54332	14633	14652	+	13.0491	7.62e-06	0.507	TGGTCACTGGGTGCTGCTGA
MIT_LM2		chr7-55763041-INS-54332	29446	29464	-	13.4969	7.96e-06	0.124	GGGACACTAGGTGACAGAG
REN_20		chr7-55763041-INS-54332	28517	28536	-	5.95714	8.06e-06	0.514	CGTGCCTCCAGGGTGCTCTG
MIT_LM2		chr7-55763041-INS-54332	4776	4794	+	13.3374	8.74e-06	0.124	TGCCCAACAGAGGGCATGG
REN_20		chr3-84900406-INS-15193	14270	14289	-	5.67143	8.9e-06	0.514	ACTACCACCAGATTGAACAG
MIT_LM7		chr7-55763041-INS-54332	3900	3919	-	13.2147	8.96e-06	0.402	TCTCCAGTAGCTGGGACTAC
MIT_LM23		chr7-55763041-INS-54332	14495	14514	-	12.7485	9.01e-06	0.507	GTTCCACCATGTGGTAATGC
MIT_LM7		chr4-189233218-INS-68	31	50	-	13.1963	9.06e-06	0.402	ACACCACCAGAGAGCACTAC
REN_20		chr7-55763041-INS-54332	43549	43568	-	5.42857	9.66e-06	0.514	TTGACCCGGAGGTGGCTGTA
MIT_LM2		chr7-55763041-INS-54332	24810	24828	+	13.0798	1.02e-05	0.124	ATGCCTCCATAGGGCAGTC
MIT_LM7		chr7-55763041-INS-54332	52329	52348	-	12.9141	1.07e-05	0.402	GGGGCTGCAGAGGGTGGTGC
EMBL_M2		chr3-84900406-INS-15193	4086	4094	-	12.75	1.12e-05	0.774	GGAAGTGCA
REN_20		chr7-55763041-INS-54332	2357	2376	+	4.87143	1.16e-05	0.514	TCAGCAGCCAGGGGGTGCTT
MIT_LM7		chr7-55763041-INS-54332	6657	6676	+	12.6871	1.22e-05	0.402	TCCCCAGGAGCTGGGACTAT
MIT_LM23		chr7-55763041-INS-54332	48175	48194	-	12.1902	1.22e-05	0.507	GGGGCTGCAGCTGGCGCTGG
MIT_LM23		chr3-84900406-INS-15193	14269	14288	-	12.1534	1.25e-05	0.507	CTACCACCAGATTGAACAGG
MIT_LM23		chr3-84900406-INS-15193	3439	3458	+	12.1411	1.26e-05	0.507	TCACCAGCAGAGGCTGCAGA
MIT_LM7		chr7-55763041-INS-54332	29703	29722	+	12.5951	1.29e-05	0.402	TCCCCAGTAGCTGGGACTAC
EMBL_M1		chr3-84900406-INS-15193	5418	5431	-	13.0675	1.31e-05	0.551	CACCATCTGGGGGC
EMBL_M1		chr7-55763041-INS-54332	29449	29462	+	13	1.37e-05	0.551	TGTCACCTAGTGTC
REN_20		chr11-90259558-INS-30815	17429	17448	-	4.24286	1.4e-05	0.514	AGGACCTGTAGTTGGAACCA
REN_20		chr5-110144557-INS-6081	5536	5555	+	4.2	1.42e-05	0.514	GGAGCCTACAGAGGCAGGCA
MIT_LM7		chr7-55763041-INS-54332	7974	7993	-	12.3742	1.46e-05	0.402	TTGCCAGCACAGGGTATTAT
EMBL_M2		chr20-31730454-INS-1425	1309	1317	+	12.6829	1.52e-05	0.774	AGAACTGCA
MIT_LM7		chr7-55763041-INS-54332	27752	27771	+	12.2883	1.54e-05	0.402	GCTCCAGCAAATGGAGGAGT
MIT_LM23		chr11-90259558-INS-30815	5056	5075	-	11.7669	1.54e-05	0.507	TAACCCCCAGATGGGGGAGT
MIT_LM23		chr7-55763041-INS-54332	14498	14517	+	11.6748	1.62e-05	0.507	TTACCACATGGTGGAACATG
MIT_LM7		chr11-90259558-INS-30815	5056	5075	-	12.1288	1.69e-05	0.402	TAACCCCCAGATGGGGGAGT
MIT_LM23		chr7-55763041-INS-54332	48090	48109	+	11.5337	1.74e-05	0.507	AAGCTACCAGGAGGAGCTTT
EMBL_M2		chr19-43329085-INS-5440	1603	1611	+	12.3476	1.74e-05	0.774	GGAACTGCC
MIT_LM2		chr7-55763041-INS-54332	50448	50466	-	12.1227	1.75e-05	0.124	GGGTCACCTGAGGTCAGGA
MIT_LM2		chr7-55763041-INS-54332	12147	12165	-	12.1043	1.77e-05	0.124	AGCCCAGAAGATGGAAGCT
MIT_LM7		chr3-84900406-INS-15193	5416	5435	+	11.9939	1.82e-05	0.402	AGGCCCCCAGATGGTGCAAG
EMBL_M1		chr7-55763041-INS-54332	24812	24825	-	12.5399	1.86e-05	0.551	TGCCCTATGGAGGC
MIT_LM2		chr7-55763041-INS-54332	4509	4527	-	12.0123	1.86e-05	0.124	AGATCACCTGATGTCAGGA
MIT_LM23		chr7-55763041-INS-54332	2358	2377	+	11.4049	1.87e-05	0.507	CAGCAGCCAGGGGGTGCTTT
MIT_LM7		chr7-55763041-INS-54332	4746	4765	+	11.9264	1.89e-05	0.402	TGAACACAAGGAGGTGCTGG
MIT_LM2		chr7-55763041-INS-54332	3901	3919	-	11.9509	1.92e-05	0.124	TCTCCAGTAGCTGGGACTA
REN_20		chr3-151664751-INS-10490	474	493	-	2.94286	1.99e-05	0.548	GTAACAGCAAGATGGCTGCC
MIT_LM2		chr20-31730454-INS-1425	10	28	+	11.8773	2e-05	0.124	GGATCACTTGAGGTCAGGA
MIT_LM2		chr7-55763041-INS-54332	357	375	+	11.8773	2e-05	0.124	GGATCACTTGAGGTCAGGA
MIT_LM2		chr7-55763041-INS-54332	21661	21679	-	11.8773	2e-05	0.124	GGATCACTTGAGGTCAGGA
REN_20		chr19-43329085-INS-5440	2410	2429	+	2.88571	2.01e-05	0.548	GGCACCACAAGGGGGATAGG
MIT_LM23		chr3-195622265-INS-103	44	63	+	11.2577	2.02e-05	0.507	TGGCCTCGGGGAGGTGCTGG
REN_20		chr11-3654367-INS-2708	2505	2524	-	2.87143	2.02e-05	0.548	AGGACAGACAGAGGGAGGAG
MIT_LM2		chr4-189232875-INS-2722	615	633	-	11.8528	2.03e-05	0.124	ACACCACCACAGAGCAGTA
MIT_LM2		chr4-189232875-INS-2722	717	735	-	11.8528	2.03e-05	0.124	ACACCACCACAGAGCAGTA
MIT_LM7		chr3-84900406-INS-15193	3761	3780	+	11.7485	2.09e-05	0.402	TGAGCTGCAGTTGGCTCTGC
MIT_LM2		chr7-55763041-INS-54332	23274	23292	+	11.7669	2.13e-05	0.124	AGATCACTTGAGGTCAGGA
MIT_LM2		chr7-55763041-INS-54332	12482	12500	-	11.7362	2.17e-05	0.124	GGATCACCTGAGGTCAGGA
MIT_LM2		chr7-55763041-INS-54332	18711	18729	+	11.7362	2.17e-05	0.124	GGATCACCTGAGGTCAGGA
MIT_LM2		chr7-55763041-INS-54332	34210	34228	-	11.7362	2.17e-05	0.124	GGATCACCTGAGGTCAGGA
MIT_LM2		chr7-55763041-INS-54332	41438	41456	+	11.7362	2.17e-05	0.124	GGATCACCTGAGGTCAGGA
MIT_LM2		chr7-55763041-INS-54332	41736	41754	+	11.7362	2.17e-05	0.124	GGATCACCTGAGGTCAGGA
MIT_LM2		chr20-31730454-INS-1425	782	800	-	11.6258	2.3e-05	0.124	AGATCACCTGAGGTCAGGA
MIT_LM2		chr7-55763041-INS-54332	956	974	+	11.6258	2.3e-05	0.124	AGATCACCTGAGGTCAGGA
MIT_LM2		chr7-55763041-INS-54332	50834	50852	-	11.6258	2.3e-05	0.124	AGATCACCTGAGGTCAGGA
MIT_LM2		chr7-55763041-INS-54332	50998	51016	+	11.6258	2.3e-05	0.124	AGATCACCTGAGGTCAGGA
MIT_LM2		chr7-55763041-INS-54332	43549	43567	-	11.6196	2.31e-05	0.124	TGACCCGGAGGTGGCTGTA
MIT_LM7		chr7-55763041-INS-54332	10518	10537	+	11.5706	2.31e-05	0.402	CAAACACCAGCTGGCTGTCT
EMBL_M2		chr4-189232875-INS-2722	712	720	-	12.0061	2.45e-05	0.774	AGTACTGCA
MIT_LM2		chr4-189235431-INS-205	98	116	-	11.5031	2.46e-05	0.124	AAACCACCACAGAGCACTA
MIT_LM2		chr3-151664751-INS-10490	9268	9286	-	11.454	2.52e-05	0.124	CACCCACCAGAAGGAAGAA
MIT_LM7		chr11-90259558-INS-30815	22114	22133	-	11.4049	2.53e-05	0.402	GGTCCCATAGATGGCTCTGG
REN_20		chr7-55763041-INS-54332	42397	42416	-	1.7	2.6e-05	0.603	CCGGCCTGCTGGTGGTTCTT
MIT_LM2		chr3-84900406-INS-15193	3532	3550	-	11.3988	2.6e-05	0.124	CTCCCAGTAGGGGTCGACA
REN_20		chr11-90259558-INS-30815	1607	1626	+	1.64286	2.63e-05	0.603	CCTACCACAAGAGAGTGCGT
EMBL_M1		chr7-55763041-INS-54332	53817	53830	+	11.9939	2.63e-05	0.551	TGACCTCAGGTGGT
MIT_LM2		chr11-90259558-INS-30815	17085	17103	+	11.3681	2.65e-05	0.124	TTTCAAGAAGGAGGCAGTG
MIT_LM23		chr7-55763041-INS-54332	41770	41789	+	10.7055	2.69e-05	0.604	GGCCCACAAGGTGAAACTAC
MIT_LM7		chr19-43329085-INS-5440	4130	4149	-	11.2883	2.7e-05	0.402	TAGCCAGAAAACGGCACTTT
MIT_LM2		chr3-151664751-INS-10490	1193	1211	-	11.3129	2.72e-05	0.124	GCCCCACAGGAAGGCAGCC
EMBL_M2		chr7-55763041-INS-54332	33756	33764	-	11.9512	2.74e-05	0.774	GGAACTGCT
EMBL_M2		chr7-55763041-INS-54332	34743	34751	+	11.9512	2.74e-05	0.774	GGAACTGCT
EMBL_M1		chr7-55763041-INS-54332	11106	11119	-	11.9202	2.76e-05	0.551	CTCCACCTCCTGGG
EMBL_M1		chr7-55763041-INS-54332	45390	45403	+	11.9202	2.76e-05	0.551	CTCCACCTCCTGGG
EMBL_M1		chr7-55763041-INS-54332	51156	51169	-	11.9202	2.76e-05	0.551	CTCCACCTCCTGGG
MIT_LM7		chr11-90259558-INS-30815	9845	9864	+	11.2454	2.76e-05	0.402	CATACAGGAGATGGAGATTT
MIT_LM7		chr3-84900406-INS-15193	14269	14288	-	11.2209	2.8e-05	0.402	CTACCACCAGATTGAACAGG
MIT_LM23		chr7-55763041-INS-54332	48282	48301	+	10.6258	2.81e-05	0.604	CCGCCACCTGGCGCCGCTCA
MIT_LM7		chr5-110144557-INS-6081	5276	5295	-	11.184	2.86e-05	0.402	CCTGCAGCTGAGGGTCCTGT
MIT_LM7		chr7-55763041-INS-54332	41252	41271	-	11.1288	2.95e-05	0.402	GGACAACCAGAGGTCACTCA
EMBL_M2		chr7-55763041-INS-54332	40864	40872	-	11.878	2.97e-05	0.774	GGCAGTGCA
REN_20		chr7-55763041-INS-54332	14497	14516	+	0.885714	3e-05	0.603	ATTACCACATGGTGGAACAT
MIT_LM2		chr7-55763041-INS-54332	37126	37144	-	11.1288	3.01e-05	0.124	CCATCAGCAAATGGCACTC
MIT_LM2		chr3-151664751-INS-10490	7004	7022	+	11.0613	3.12e-05	0.124	GGATGACCAGAGGTCAGTC
MIT_LM2		chr7-55763041-INS-54332	29703	29721	+	11.0613	3.12e-05	0.124	TCCCCAGTAGCTGGGACTA
MIT_LM2		chr7-55763041-INS-54332	44081	44099	+	11.0429	3.15e-05	0.124	GGAGCACTTGAGGTCAGGA
MIT_LM23		chr4-1357005-INS-82	49	68	-	10.3926	3.16e-05	0.604	TAACCAGCTGGAGGGGCCCA
MIT_LM7		chr7-55763041-INS-54332	14495	14514	-	10.9755	3.2e-05	0.402	GTTCCACCATGTGGTAATGC
MIT_LM2		chr7-55763041-INS-54332	20953	20971	-	11.0061	3.21e-05	0.124	GAATCACCTGAGGTCAGGA
MIT_LM23		chr3-84900406-INS-15193	3283	3302	+	10.3497	3.23e-05	0.604	TGACCTACAGATGGGGTTTT
MIT_LM2		chr7-55763041-INS-54332	20106	20124	+	10.9939	3.23e-05	0.124	GGGTCACCCGAGGTCAGGA
EMBL_M2		chr7-55763041-INS-54332	24990	24998	-	11.811	3.27e-05	0.774	AGCACTGCA
EMBL_M2		chr7-55763041-INS-54332	26635	26643	-	11.811	3.27e-05	0.774	AGCACTGCA
MIT_LM2		chr7-55763041-INS-54332	27217	27235	+	10.9632	3.29e-05	0.124	AGATCACCTGAGGTCAGGG
MIT_LM2		chr7-55763041-INS-54332	32724	32742	+	10.9632	3.29e-05	0.124	AGATCACCTGAGGTCAGGG
EMBL_M1		chr3-84900406-INS-15193	4993	5006	-	11.6319	3.3e-05	0.551	TGTCATCTGGTAGC
EMBL_M1		chr3-84900406-INS-15193	3441	3454	-	11.6258	3.32e-05	0.551	CAGCCTCTGCTGGT
EMBL_M1		chr3-84900406-INS-15193	1153	1166	+	11.6196	3.33e-05	0.551	TGCCTTCTGCTAGC
EMBL_M1		chr5-110144557-INS-6081	3084	3097	+	11.6196	3.33e-05	0.551	TGCCTTCTGCTAGC
MIT_LM23		chr7-55763041-INS-54332	47681	47700	-	10.2454	3.41e-05	0.604	CGGCCAGCGGGAGATGCCCT
MIT_LM2		chr7-55763041-INS-54332	10177	10195	+	10.865	3.46e-05	0.124	GGACCATCTGAGGTCAGGA
EMBL_M1		chr19-43329085-INS-5440	2413	2426	-	11.546	3.48e-05	0.551	ATCCCCCTTGTGGT
EMBL_M1		chr7-55763041-INS-54332	7978	7991	+	11.546	3.48e-05	0.551	TACCCTGTGCTGGC
MIT_LM2		chr4-189235431-INS-205	30	48	-	10.8466	3.5e-05	0.124	ACACCACCACAGAGCACTA
MIT_LM2		chr4-189234207-INS-272	30	48	-	10.8466	3.5e-05	0.124	ACACCACCACAGAGCACTA
MIT_LM2		chr4-189232875-INS-2722	35	53	-	10.8466	3.5e-05	0.124	ACACCACCACAGAGCACTA
MIT_LM2		chr4-189235431-INS-205	64	82	-	10.8466	3.5e-05	0.124	ACACCACCACAGAGCACTA
MIT_LM2		chr4-189232875-INS-2722	69	87	-	10.8466	3.5e-05	0.124	ACACCACCACAGAGCACTA
MIT_LM2		chr4-189235431-INS-205	132	150	-	10.8466	3.5e-05	0.124	ACACCACCACAGAGCACTA
MIT_LM2		chr4-189234207-INS-272	132	150	-	10.8466	3.5e-05	0.124	ACACCACCACAGAGCACTA
MIT_LM2		chr4-189234207-INS-272	166	184	-	10.8466	3.5e-05	0.124	ACACCACCACAGAGCACTA
MIT_LM2		chr4-189234207-INS-272	200	218	-	10.8466	3.5e-05	0.124	ACACCACCACAGAGCACTA
MIT_LM2		chr4-189234207-INS-272	234	252	-	10.8466	3.5e-05	0.124	ACACCACCACAGAGCACTA
MIT_LM2		chr4-189232875-INS-2722	478	496	-	10.8466	3.5e-05	0.124	ACACCACCACAGAGCACTA
MIT_LM2		chr4-189232875-INS-2722	513	531	-	10.8466	3.5e-05	0.124	ACACCACCACAGAGCACTA
MIT_LM2		chr4-189232875-INS-2722	547	565	-	10.8466	3.5e-05	0.124	ACACCACCACAGAGCACTA
MIT_LM2		chr4-189232875-INS-2722	683	701	-	10.8466	3.5e-05	0.124	ACACCACCACAGAGCACTA
MIT_LM2		chr4-189232875-INS-2722	819	837	-	10.8466	3.5e-05	0.124	ACACCACCACAGAGCACTA
MIT_LM2		chr4-189232875-INS-2722	887	905	-	10.8466	3.5e-05	0.124	ACACCACCACAGAGCACTA
MIT_LM2		chr4-189232875-INS-2722	1023	1041	-	10.8466	3.5e-05	0.124	ACACCACCACAGAGCACTA
MIT_LM2		chr4-189232875-INS-2722	1091	1109	-	10.8466	3.5e-05	0.124	ACACCACCACAGAGCACTA
MIT_LM2		chr4-189232875-INS-2722	1125	1143	-	10.8466	3.5e-05	0.124	ACACCACCACAGAGCACTA
MIT_LM2		chr4-189232875-INS-2722	1159	1177	-	10.8466	3.5e-05	0.124	ACACCACCACAGAGCACTA
MIT_LM2		chr4-189232875-INS-2722	1193	1211	-	10.8466	3.5e-05	0.124	ACACCACCACAGAGCACTA
MIT_LM2		chr4-189232875-INS-2722	1227	1245	-	10.8466	3.5e-05	0.124	ACACCACCACAGAGCACTA
MIT_LM2		chr4-189232875-INS-2722	1261	1279	-	10.8466	3.5e-05	0.124	ACACCACCACAGAGCACTA
MIT_LM2		chr4-189232875-INS-2722	1295	1313	-	10.8466	3.5e-05	0.124	ACACCACCACAGAGCACTA
MIT_LM2		chr4-189232875-INS-2722	1329	1347	-	10.8466	3.5e-05	0.124	ACACCACCACAGAGCACTA
MIT_LM2		chr4-189232875-INS-2722	1363	1381	-	10.8466	3.5e-05	0.124	ACACCACCACAGAGCACTA
MIT_LM2		chr4-189232875-INS-2722	1465	1483	-	10.8466	3.5e-05	0.124	ACACCACCACAGAGCACTA
MIT_LM2		chr4-189232875-INS-2722	1499	1517	-	10.8466	3.5e-05	0.124	ACACCACCACAGAGCACTA
MIT_LM2		chr4-189232875-INS-2722	1533	1551	-	10.8466	3.5e-05	0.124	ACACCACCACAGAGCACTA
MIT_LM2		chr4-189232875-INS-2722	1669	1687	-	10.8466	3.5e-05	0.124	ACACCACCACAGAGCACTA
MIT_LM2		chr4-189232875-INS-2722	1703	1721	-	10.8466	3.5e-05	0.124	ACACCACCACAGAGCACTA
MIT_LM2		chr4-189232875-INS-2722	1737	1755	-	10.8466	3.5e-05	0.124	ACACCACCACAGAGCACTA
MIT_LM2		chr4-189232875-INS-2722	1771	1789	-	10.8466	3.5e-05	0.124	ACACCACCACAGAGCACTA
MIT_LM2		chr4-189232875-INS-2722	1805	1823	-	10.8466	3.5e-05	0.124	ACACCACCACAGAGCACTA
MIT_LM2		chr4-189232875-INS-2722	1873	1891	-	10.8466	3.5e-05	0.124	ACACCACCACAGAGCACTA
MIT_LM2		chr4-189232875-INS-2722	2009	2027	-	10.8466	3.5e-05	0.124	ACACCACCACAGAGCACTA
MIT_LM2		chr4-189232875-INS-2722	2043	2061	-	10.8466	3.5e-05	0.124	ACACCACCACAGAGCACTA
MIT_LM2		chr4-189232875-INS-2722	2077	2095	-	10.8466	3.5e-05	0.124	ACACCACCACAGAGCACTA
MIT_LM2		chr4-189232875-INS-2722	2179	2197	-	10.8466	3.5e-05	0.124	ACACCACCACAGAGCACTA
MIT_LM2		chr4-189232875-INS-2722	2213	2231	-	10.8466	3.5e-05	0.124	ACACCACCACAGAGCACTA
MIT_LM2		chr4-189232875-INS-2722	2247	2265	-	10.8466	3.5e-05	0.124	ACACCACCACAGAGCACTA
MIT_LM2		chr4-189232875-INS-2722	2315	2333	-	10.8466	3.5e-05	0.124	ACACCACCACAGAGCACTA
MIT_LM2		chr4-189232875-INS-2722	2349	2367	-	10.8466	3.5e-05	0.124	ACACCACCACAGAGCACTA
MIT_LM2		chr4-189232875-INS-2722	2383	2401	-	10.8466	3.5e-05	0.124	ACACCACCACAGAGCACTA
MIT_LM2		chr4-189232875-INS-2722	2417	2435	-	10.8466	3.5e-05	0.124	ACACCACCACAGAGCACTA
MIT_LM2		chr4-189232875-INS-2722	2519	2537	-	10.8466	3.5e-05	0.124	ACACCACCACAGAGCACTA
MIT_LM2		chr4-189232875-INS-2722	2553	2571	-	10.8466	3.5e-05	0.124	ACACCACCACAGAGCACTA
MIT_LM2		chr4-189232875-INS-2722	2621	2639	-	10.8466	3.5e-05	0.124	ACACCACCACAGAGCACTA
MIT_LM23		chr7-55763041-INS-54332	23939	23958	+	10.1043	3.66e-05	0.604	TACCCAGCAGATGGTGAGAC
EMBL_M2		chr19-43329085-INS-5440	3431	3439	+	11.7744	3.67e-05	0.774	GGAATTGCA
MIT_LM7		chr7-55763041-INS-54332	11104	11123	+	10.7178	3.68e-05	0.402	AACCCAGGAGGTGGAGGTTG
MIT_LM7		chr7-55763041-INS-54332	45386	45405	-	10.7178	3.68e-05	0.402	AACCCAGGAGGTGGAGGTTG
MIT_LM7		chr7-55763041-INS-54332	51154	51173	+	10.7178	3.68e-05	0.402	AACCCAGGAGGTGGAGGTTG
MIT_LM23		chr7-55763041-INS-54332	42396	42415	-	10.0859	3.7e-05	0.604	CGGCCTGCTGGTGGTTCTTG
EMBL_M1		chr7-55763041-INS-54332	12150	12163	+	11.4294	3.74e-05	0.551	TTCCATCTTCTGGG
MIT_LM2		chr3-151664751-INS-10490	2283	2301	+	10.7117	3.76e-05	0.132	AACCCACCAGAAGGAAGAA
EMBL_M1		chr3-151664751-INS-10490	2285	2298	-	11.4172	3.77e-05	0.551	TTCCTTCTGGTGGG
EMBL_M1		chr3-151664751-INS-10490	9271	9284	+	11.4172	3.77e-05	0.551	TTCCTTCTGGTGGG
MIT_LM7		chr7-55763041-INS-54332	462	481	-	10.6748	3.77e-05	0.402	TCCCAAGTAGTTGGGACTGT
MIT_LM7		chr3-151664751-INS-10490	1293	1312	-	10.6748	3.77e-05	0.402	TGTGGAGCAGGGGGCGGCGC
MIT_LM7		chr7-55763041-INS-54332	31080	31099	-	10.6258	3.87e-05	0.402	TGGGCAGAAGAGGAGGCTGA
EMBL_M2		chr5-110144557-INS-6081	5099	5107	+	11.7378	3.89e-05	0.774	GGAACTGCG
MIT_LM7		chr7-55763041-INS-54332	2669	2688	-	10.5399	4.05e-05	0.402	GAAGCAGGTGATGGAGCTGG
MIT_LM7		chr11-134046062-INS-135	26	45	+	10.5337	4.07e-05	0.402	TGAGCAGGGGAAGGTGCTGT
MIT_LM7		chr11-134046062-INS-135	116	135	+	10.5337	4.07e-05	0.402	TGAGCAGGGGAAGGTGCTGT
EMBL_M1		chr7-55763041-INS-54332	41256	41269	+	11.2883	4.08e-05	0.551	TGACCTCTGGTTGT
MIT_LM2		chr3-84900406-INS-15193	4866	4884	+	10.5337	4.13e-05	0.144	AAGTCACTGGATGGCATGG
EMBL_M1		chr7-55763041-INS-54332	2360	2373	-	11.2577	4.16e-05	0.551	CACCCCCTGGCTGC
REN_20		chr4-189233218-INS-68	32	51	-	-1.52857	4.18e-05	0.603	AACACCACCAGAGAGCACTA
REN_20		chr7-55763041-INS-54332	4775	4794	+	-1.58571	4.21e-05	0.603	GTGCCCAACAGAGGGCATGG
REN_20		chr11-90259558-INS-30815	30529	30548	-	-1.61429	4.22e-05	0.603	TTTGCAGGAAGATGGATGGA
MIT_LM2		chr7-55763041-INS-54332	29326	29344	+	10.3926	4.44e-05	0.153	AGGACACTGGAGGACAGGA
MIT_LM2		chr3-84900406-INS-15193	14270	14288	-	10.3497	4.54e-05	0.154	CTACCACCAGATTGAACAG
REN_20		chr3-84900406-INS-15193	5415	5434	+	-2.24286	4.58e-05	0.603	CAGGCCCCCAGATGGTGCAA
REN_20		chr7-55763041-INS-54332	41253	41272	-	-2.24286	4.58e-05	0.603	AGGACAACCAGAGGTCACTC
EMBL_M2		chr7-55763041-INS-54332	9055	9063	+	11.4695	4.58e-05	0.774	GGAACAGCA
EMBL_M2		chr7-55763041-INS-54332	28623	28631	+	11.4695	4.58e-05	0.774	GGAACAGCA
MIT_LM2		chr7-55763041-INS-54332	10518	10536	+	10.3313	4.59e-05	0.154	CAAACACCAGCTGGCTGTC
EMBL_M1		chr3-84900406-INS-15193	4868	4881	-	11.0859	4.61e-05	0.551	TGCCATCCAGTGAC
MIT_LM2		chr7-55763041-INS-54332	41770	41788	+	10.319	4.62e-05	0.154	GGCCCACAAGGTGAAACTA
REN_20		chr7-55763041-INS-54332	48176	48195	-	-2.37143	4.65e-05	0.603	CGGGGCTGCAGCTGGCGCTG
EMBL_M1		chr7-55763041-INS-54332	48363	48376	+	11.0368	4.75e-05	0.551	TGACCTCTGACGGC
REN_20		chr7-55763041-INS-54332	31489	31508	-	-2.57143	4.78e-05	0.603	ATCATCACCAGAGTGCAGCA
MIT_LM2		chr7-55763041-INS-54332	44915	44933	+	10.2393	4.81e-05	0.159	ACATCACCTGAGGTCAGGA
MIT_LM7		chr5-110144557-INS-6081	5480	5499	+	10.1963	4.87e-05	0.421	AAGTCTGCAGAGGTTACTGC
MIT_LM23		chr7-55763041-INS-54332	44594	44613	-	9.52761	4.89e-05	0.67	TTTCGACAAGGTCTTGCTCT
MIT_LM7		chr19-43329085-INS-5440	1458	1477	+	10.184	4.9e-05	0.421	AGAATAGCAGATGGAACACT
REN_20		chr7-55763041-INS-54332	14298	14317	+	-2.8	4.94e-05	0.603	CTGGGCAACAGAGGGAGACC
REN_20		chr7-55763041-INS-54332	1612	1631	+	-2.81429	4.95e-05	0.603	ATAGCCTAGAAGGGGCTGGT
MIT_LM2		chr4-189232875-INS-2722	410	428	-	10.184	4.95e-05	0.159	ACACCACCACAGAGCACTG
MIT_LM2		chr4-189232875-INS-2722	751	769	-	10.184	4.95e-05	0.159	ACACCACCACAGAGCACTG
MIT_LM2		chr4-189232875-INS-2722	921	939	-	10.184	4.95e-05	0.159	ACACCACCACAGAGCACTG
EMBL_M1		chr3-84900406-INS-15193	14273	14286	+	10.9571	4.98e-05	0.551	TTCAATCTGGTGGT
MIT_LM7		chr11-90259558-INS-30815	7465	7484	+	10.1411	5.01e-05	0.421	CATCCATCAGGGTGAGCTGA
MIT_LM7		chr7-55763041-INS-54332	28516	28535	-	10.1288	5.04e-05	0.421	GTGCCTCCAGGGTGCTCTGC
MIT_LM2		chr3-84900406-INS-15193	4991	5009	+	10.1472	5.05e-05	0.16	AGGCTACCAGATGACACCT
MIT_LM23		chr7-55763041-INS-54332	3900	3919	-	9.41104	5.19e-05	0.67	TCTCCAGTAGCTGGGACTAC
MIT_LM7		chr19-43329085-INS-5440	1933	1952	-	10.0736	5.19e-05	0.421	TGTGCAGCGGCTGCCGCTGC
REN_20		chr11-90259558-INS-30815	5057	5076	-	-3.15714	5.22e-05	0.603	ATAACCCCCAGATGGGGGAG
REN_20		chr7-55763041-INS-54332	37126	37145	-	-3.22857	5.27e-05	0.603	GCCATCAGCAAATGGCACTC
EMBL_M2		chr11-90259558-INS-30815	18018	18026	-	11.0976	5.28e-05	0.774	GGTATTGCA
EMBL_M1		chr7-55763041-INS-54332	28593	28606	-	10.8466	5.31e-05	0.551	CTTCCCCTAGTGTC
MIT_LM23		chr7-55763041-INS-54332	5542	5561	-	9.34969	5.35e-05	0.67	TGAGCACCACGTATTGCCTT
MIT_LM23		chr11-90259558-INS-30815	7465	7484	+	9.34356	5.36e-05	0.67	CATCCATCAGGGTGAGCTGA
MIT_LM7		chr7-55763041-INS-54332	50162	50181	-	9.99387	5.42e-05	0.421	CCAGCAACAGATGGGCCTGG
MIT_LM23		chr11-90259558-INS-30815	8279	8298	-	9.30675	5.46e-05	0.67	TGATGATCAGGTGGTGTTAG
REN_20		chr7-55763041-INS-54332	24809	24828	+	-3.45714	5.48e-05	0.603	TATGCCTCCATAGGGCAGTC
MIT_LM7		chr3-151664751-INS-10490	6715	6734	+	9.96933	5.49e-05	0.421	ACCCCAGGAGAGGGTTCTTG
REN_20		chr3-151664751-INS-10490	1377	1396	-	-3.48571	5.5e-05	0.603	CAGGGCTGCAGGTGGAGCTG
EMBL_M2		chr3-151664751-INS-10490	1146	1154	-	11.0793	5.5e-05	0.774	GGCACTGCT
EMBL_M2		chr7-55763041-INS-54332	37248	37256	+	11.0793	5.5e-05	0.774	GGCACTGCT
REN_20		chr7-55763041-INS-54332	8114	8133	-	-3.58571	5.6e-05	0.603	GAGGCCAGGAGTTGGAGGAG
EMBL_M1		chr7-55763041-INS-54332	42660	42673	-	10.7546	5.6e-05	0.551	TTGCCCCTGCTGGA
MIT_LM7		chr7-55763041-INS-54332	43299	43318	-	9.92638	5.61e-05	0.421	TGTTCTGCAGGGGGAAATGC
EMBL_M1		chr3-151664751-INS-10490	10050	10063	-	10.7423	5.65e-05	0.551	TCCCCTCTGGAGGA
MIT_LM7		chr7-55763041-INS-54332	4776	4795	+	9.91411	5.65e-05	0.421	TGCCCAACAGAGGGCATGGA
MIT_LM23		chr4-189233218-INS-68	31	50	-	9.22086	5.7e-05	0.67	ACACCACCAGAGAGCACTAC
MIT_LM2		chr7-55763041-INS-54332	7975	7993	-	9.90798	5.71e-05	0.176	TTGCCAGCACAGGGTATTA
EMBL_M1		chr3-151664751-INS-10490	1380	1393	+	10.6994	5.79e-05	0.551	CTCCACCTGCAGCC
EMBL_M1		chr7-55763041-INS-54332	28747	28760	-	10.681	5.84e-05	0.551	TGCCCCCTACTACC
MIT_LM7		chr7-55763041-INS-54332	7415	7434	-	9.84049	5.87e-05	0.421	ACCTCAGTAGCTGGGACTAT
EMBL_M1		chr11-90259558-INS-30815	5060	5073	+	10.6687	5.89e-05	0.551	CCCCATCTGGGGGT
EMBL_M1		chr7-55763041-INS-54332	31492	31505	+	10.6626	5.9e-05	0.551	TGCACTCTGGTGAT
MIT_LM7		chr4-189232875-INS-2722	409	428	-	9.81595	5.94e-05	0.421	ACACCACCACAGAGCACTGC
MIT_LM7		chr4-189232875-INS-2722	750	769	-	9.81595	5.94e-05	0.421	ACACCACCACAGAGCACTGC
MIT_LM7		chr4-189232875-INS-2722	920	939	-	9.81595	5.94e-05	0.421	ACACCACCACAGAGCACTGC
MIT_LM2		chr7-55763041-INS-54332	46414	46432	-	9.82822	5.95e-05	0.176	TGCCCACTTGATTGGAGCA
REN_20		chr3-151664751-INS-10490	9268	9287	-	-3.94286	5.97e-05	0.603	GCACCCACCAGAAGGAAGAA
MIT_LM2		chr7-55763041-INS-54332	46746	46764	-	9.79141	6.07e-05	0.176	GGATCACTTGAGGCCAGGA
MIT_LM23		chr19-43329085-INS-5440	1674	1693	+	9.09202	6.07e-05	0.67	TGAATAGCAGGTGGATCAGA
MIT_LM23		chr11-90259558-INS-30815	20435	20454	-	9.07975	6.11e-05	0.67	GTGCCACCATGTCTGGCTAA
EMBL_M2		chr7-55763041-INS-54332	3629	3637	+	11.0549	6.13e-05	0.774	AGAAGTGCA
EMBL_M2		chr11-90259558-INS-30815	17612	17620	+	11.0549	6.13e-05	0.774	AGAAGTGCA
MIT_LM23		chr7-55763041-INS-54332	47962	47981	+	9.06748	6.14e-05	0.67	GGAACTCGAGGCGGGGCTGT
MIT_LM23		chr11-90259558-INS-30815	1608	1627	+	9.06135	6.16e-05	0.67	CTACCACAAGAGAGTGCGTT
EMBL_M1		chr7-128107669-INS-67	22	35	+	10.589	6.16e-05	0.551	CGTCCCCTGCCAGC
EMBL_M1		chr11-90259558-INS-30815	7633	7646	-	10.5583	6.28e-05	0.551	TGTTCCCTAGTGGT
MIT_LM2		chr4-189232875-INS-2722	2281	2299	-	9.71166	6.32e-05	0.176	ACACCACAACAGAGCACTA
MIT_LM2		chr7-55763041-INS-54332	28926	28944	+	9.68098	6.42e-05	0.176	AGATCACTTGAGGCCAGGA
MIT_LM2		chr19-43329085-INS-5440	41	59	-	9.67485	6.44e-05	0.176	TGCCCACCAGAGAACAACC
MIT_LM2		chr3-84900406-INS-15193	5964	5982	+	9.67485	6.44e-05	0.176	TAACCTGCTGGGGTCAGGG
MIT_LM2		chr4-189232875-INS-2722	1	19	-	9.66871	6.46e-05	0.176	ACACCACCACAGAGCACTC
MIT_LM2		chr4-189234207-INS-272	98	116	-	9.66871	6.46e-05	0.176	ACACCACCACAGAGCACTC
MIT_LM2		chr4-189232875-INS-2722	171	189	-	9.66871	6.46e-05	0.176	ACACCACCACAGAGCACTC
MIT_LM2		chr4-189232875-INS-2722	581	599	-	9.66871	6.46e-05	0.176	ACACCACCACAGAGCACTC
MIT_LM2		chr4-189232875-INS-2722	649	667	-	9.66871	6.46e-05	0.176	ACACCACCACAGAGCACTC
MIT_LM2		chr4-189232875-INS-2722	785	803	-	9.66871	6.46e-05	0.176	ACACCACCACAGAGCACTC
MIT_LM2		chr4-189232875-INS-2722	989	1007	-	9.66871	6.46e-05	0.176	ACACCACCACAGAGCACTC
MIT_LM2		chr4-189232875-INS-2722	1057	1075	-	9.66871	6.46e-05	0.176	ACACCACCACAGAGCACTC
MIT_LM2		chr4-189232875-INS-2722	1975	1993	-	9.66871	6.46e-05	0.176	ACACCACCACAGAGCACTC
MIT_LM2		chr4-189232875-INS-2722	2145	2163	-	9.66871	6.46e-05	0.176	ACACCACCACAGAGCACTC
REN_20		chr19-16197976-INS-50	14	33	-	-4.44286	6.59e-05	0.603	GGCAGCGGCCGAGGGCGGTG
MIT_LM7		chr4-189232875-INS-2722	34	53	-	9.60123	6.64e-05	0.443	ACACCACCACAGAGCACTAT
MIT_LM7		chr4-189232875-INS-2722	477	496	-	9.60123	6.64e-05	0.443	ACACCACCACAGAGCACTAT
EMBL_M1		chr7-55763041-INS-54332	4630	4643	-	10.4417	6.71e-05	0.551	TGCCTCCTGGAGTT
MIT_LM7		chr7-55763041-INS-54332	43548	43567	-	9.57055	6.75e-05	0.443	TGACCCGGAGGTGGCTGTAA
MIT_LM7		chr7-55763041-INS-54332	37236	37255	+	9.55828	6.79e-05	0.443	GGGCTGGTAGAAGGCACTGC
EMBL_M2		chr19-43329085-INS-5440	4186	4194	+	10.9024	6.83e-05	0.774	GGCATTGCA
EMBL_M2		chr3-151664751-INS-10490	8942	8950	+	10.9024	6.83e-05	0.774	GGCATTGCA
REN_20		chr11-90259558-INS-30815	12076	12095	-	-4.61429	6.84e-05	0.603	ACTACCATCAGAGTGAGCAG
MIT_LM23		chr7-55763041-INS-54332	43548	43567	-	8.84049	6.86e-05	0.697	TGACCCGGAGGTGGCTGTAA
REN_20		chr7-55763041-INS-54332	13096	13115	+	-4.68571	6.94e-05	0.603	TTCACCAGCAGACGCTGGCA
MIT_LM7		chr7-55763041-INS-54332	2358	2377	+	9.49693	7.01e-05	0.443	CAGCAGCCAGGGGGTGCTTT
MIT_LM23		chr7-55763041-INS-54332	28516	28535	-	8.79141	7.03e-05	0.697	GTGCCTCCAGGGTGCTCTGC
EMBL_M1		chr3-151664751-INS-10490	1297	1310	+	10.3497	7.07e-05	0.551	CGCCCCCTGCTCCA
EMBL_M1		chr7-55763041-INS-54332	14301	14314	-	10.3436	7.1e-05	0.551	CTCCCTCTGTTGCC
EMBL_M1		chr7-55763041-INS-54332	30533	30546	-	10.3436	7.1e-05	0.551	CTCCCTCTGTTGCC
MIT_LM23		chr7-55763041-INS-54332	10518	10537	+	8.76687	7.11e-05	0.697	CAAACACCAGCTGGCTGTCT
MIT_LM2		chr3-151664751-INS-10490	10048	10066	+	9.47853	7.12e-05	0.192	TGTCCTCCAGAGGGGAACT
REN_20		chr7-55763041-INS-54332	37235	37254	+	-4.81429	7.14e-05	0.603	AGGGCTGGTAGAAGGCACTG
MIT_LM7		chr3-84900406-INS-15193	3531	3550	-	9.45399	7.17e-05	0.443	CTCCCAGTAGGGGTCGACAG
EMBL_M1		chr7-55763041-INS-54332	53362	53375	-	10.3252	7.17e-05	0.551	TGCTCCCTGGAGGG
REN_20		chr3-151664751-INS-10490	9540	9559	-	-4.85714	7.21e-05	0.603	GGCGCCAGCAGCGGCAACCT
REN_20		chr7-55763041-INS-54332	23938	23957	+	-4.87143	7.24e-05	0.603	ATACCCAGCAGATGGTGAGA
EMBL_M1		chr7-55763041-INS-54332	811	824	+	10.3067	7.25e-05	0.551	TGCCTTCTAGTGAA
MIT_LM23		chr3-84900406-INS-15193	3761	3780	+	8.72393	7.26e-05	0.697	TGAGCTGCAGTTGGCTCTGC
MIT_LM7		chr3-84900406-INS-15193	5369	5388	+	9.41718	7.31e-05	0.443	CAATCAGCACGGGTAACTGT
EMBL_M1		chr3-151664751-INS-10490	1119	1132	-	10.2761	7.37e-05	0.551	CACCCTCTGCAGCC
EMBL_M1		chr7-55763041-INS-54332	52333	52346	+	10.2761	7.37e-05	0.551	CACCCTCTGCAGCC
MIT_LM7		chr3-151664751-INS-10490	1643	1662	+	9.39877	7.38e-05	0.443	AATACACCAATTGGCACTCT
MIT_LM2		chr3-151664751-INS-10490	10045	10063	-	9.3865	7.45e-05	0.2	TCCCCTCTGGAGGACACTA
MIT_LM7		chr11-90259558-INS-30815	7010	7029	-	9.37423	7.47e-05	0.443	TCCCAAGTAGCTGGGACTGC
EMBL_M1		chr7-55763041-INS-54332	8117	8130	+	10.2454	7.5e-05	0.551	CTCCAACTCCTGGC
MIT_LM2		chr11-90259558-INS-30815	16857	16875	-	9.3681	7.52e-05	0.2	TTACCAGCTGGTTTCAGGA
MIT_LM23		chr19-43329085-INS-5440	2408	2427	-	8.65031	7.53e-05	0.702	TATCCCCCTTGTGGTGCCCA
REN_20		chr3-84900406-INS-15193	5788	5807	-	-5.1	7.63e-05	0.603	GTGAGGAACAGGTGGCACAC
REN_20		chr7-55763041-INS-54332	7975	7994	-	-5.11429	7.65e-05	0.603	TTTGCCAGCACAGGGTATTA
EMBL_M2		chr19-37789443-INS-1092	196	204	-	10.7927	7.69e-05	0.774	GGAACTACA
EMBL_M1		chr3-84900406-INS-15193	10102	10115	-	10.1779	7.78e-05	0.552	TGCCTCCTTATGGT
EMBL_M2		chr3-151664751-INS-10490	640	648	-	10.7195	7.92e-05	0.774	GGAAGTGCC
REN_20		chr3-84900406-INS-15193	5963	5982	+	-5.25714	7.92e-05	0.603	GTAACCTGCTGGGGTCAGGG
EMBL_M1		chr7-55763041-INS-54332	48092	48105	-	10.135	7.97e-05	0.552	CTCCTCCTGGTAGC
REN_20		chr3-151664751-INS-10490	2110	2129	+	-5.3	8e-05	0.603	TGAGCCAGTAGTGGTAACCC
EMBL_M1		chr19-16197976-INS-50	17	30	+	10.1227	8.02e-05	0.552	CGCCCTCGGCCGCT
REN_20		chr7-55763041-INS-54332	4745	4764	+	-5.34286	8.08e-05	0.603	CTGAACACAAGGAGGTGCTG
REN_20		chr7-55763041-INS-54332	29446	29465	-	-5.34286	8.08e-05	0.603	TGGGACACTAGGTGACAGAG
REN_20		chr7-55763041-INS-54332	27751	27770	+	-5.38571	8.17e-05	0.603	GGCTCCAGCAAATGGAGGAG
EMBL_M1		chr7-55763041-INS-54332	26160	26173	+	10.0859	8.19e-05	0.552	CTCCATCTCCTGAC
EMBL_M2		chr11-90259558-INS-30815	1884	1892	-	10.6524	8.22e-05	0.774	AGAACTGCC
EMBL_M2		chr3-84900406-INS-15193	5720	5728	-	10.6524	8.22e-05	0.774	AGAACTGCC
MIT_LM2		chr19-43329085-INS-5440	4131	4149	-	9.17178	8.3e-05	0.204	TAGCCAGAAAACGGCACTT
REN_20		chr7-158151485-INS-628	105	124	-	-5.5	8.4e-05	0.603	GGTGTCGGCAGGGAGAGGCA
EMBL_M2		chr3-84900406-INS-15193	5498	5506	+	10.5976	8.44e-05	0.774	GGCACAGCA
MIT_LM7		chr3-145272499-INS-8632	1098	1117	+	9.12883	8.47e-05	0.484	ACACTACCAGATGTTACAGT
MIT_LM7		chr3-84900406-INS-15193	3283	3302	+	9.12883	8.47e-05	0.484	TGACCTACAGATGGGGTTTT
MIT_LM23		chr3-145272499-INS-8632	1098	1117	+	8.39264	8.52e-05	0.736	ACACTACCAGATGTTACAGT
REN_20		chr5-110144557-INS-6081	1005	1024	-	-5.55714	8.52e-05	0.603	ACTACCATCAGAGTGAACAG
REN_20		chr7-55763041-INS-54332	10517	10536	+	-5.55714	8.52e-05	0.603	CCAAACACCAGCTGGCTGTC
EMBL_M2		chr3-196002629-INS-470	150	158	-	10.5366	8.66e-05	0.774	GGAGCTGCA
EMBL_M2		chr3-84900406-INS-15193	3169	3177	+	10.5366	8.66e-05	0.774	GGAGCTGCA
EMBL_M2		chr3-84900406-INS-15193	4232	4240	+	10.5366	8.66e-05	0.774	GGAGCTGCA
EMBL_M2		chr7-55763041-INS-54332	48344	48352	+	10.5366	8.66e-05	0.774	GGAGCTGCA
MIT_LM23		chr7-55763041-INS-54332	48279	48298	-	8.35583	8.67e-05	0.736	GCGGCGCCAGGTGGCGGGGG
MIT_LM2		chr11-90259558-INS-30815	5057	5075	-	9.06135	8.77e-05	0.204	TAACCCCCAGATGGGGGAG
EMBL_M1		chr7-55763041-INS-54332	14499	14512	+	9.96319	8.78e-05	0.566	TACCACATGGTGGA
MIT_LM23		chr7-55763041-INS-54332	48142	48161	+	8.32515	8.8e-05	0.736	CGATCGCAAGGTAGCGCAGA
MIT_LM7		chr3-151664751-INS-10490	4965	4984	-	9.04908	8.82e-05	0.493	CAGGAAGCAGAGGTTGCAGT
MIT_LM23		chr11-90259558-INS-30815	15164	15183	+	8.31288	8.85e-05	0.736	TGCCCATTAGTTGATGCAGT
EMBL_M2		chr3-151664751-INS-10490	1219	1227	+	10.4817	8.89e-05	0.774	GGGACTGCA
EMBL_M2		chr11-90259558-INS-30815	7009	7017	-	10.4817	8.89e-05	0.774	GGGACTGCA
EMBL_M2		chr7-55763041-INS-54332	19286	19294	+	10.4817	8.89e-05	0.774	GGGACTGCA
EMBL_M2		chr7-55763041-INS-54332	42993	43001	-	10.4817	8.89e-05	0.774	GGGACTGCA
EMBL_M1		chr7-55763041-INS-54332	27754	27767	-	9.93252	8.93e-05	0.566	CTCCATTTGCTGGA
EMBL_M1		chr7-55763041-INS-54332	47840	47853	-	9.92025	8.99e-05	0.566	CGTCACCGGGAGGT
MIT_LM7		chr11-90259558-INS-30815	30161	30180	-	9	9.04e-05	0.493	TCTCCAGCCGGGAGTGCGGT
MIT_LM2		chr3-151664751-INS-10490	1294	1312	-	9	9.05e-05	0.204	TGTGGAGCAGGGGGCGGCG
MIT_LM7		chr7-55763041-INS-54332	37653	37672	-	8.99387	9.07e-05	0.493	AACCCAGGAGGCGGAGCTTG
MIT_LM23		chr7-55763041-INS-54332	41252	41271	-	8.25153	9.11e-05	0.736	GGACAACCAGAGGTCACTCA
MIT_LM2		chr11-90259558-INS-30815	6663	6681	+	8.97546	9.16e-05	0.204	TCCCCAATACCTGGCAGCA
MIT_LM2		chr7-55763041-INS-54332	14498	14516	+	8.97546	9.16e-05	0.204	TTACCACATGGTGGAACAT
MIT_LM2		chr3-84900406-INS-15193	5071	5089	+	8.96933	9.19e-05	0.204	GCACCTGTGGGTGCCAGCA
MIT_LM23		chr7-55763041-INS-54332	29703	29722	+	8.22086	9.25e-05	0.736	TCCCCAGTAGCTGGGACTAC
EMBL_M2		chr3-145272499-INS-8632	941	949	-	10.378	9.29e-05	0.774	AGTAGTGCA
EMBL_M2		chr3-145272499-INS-8632	1509	1517	+	10.378	9.29e-05	0.774	AGTAGTGCA
EMBL_M2		chr7-55763041-INS-54332	6475	6483	+	10.378	9.29e-05	0.774	AGTAGTGCA
EMBL_M2		chr3-84900406-INS-15193	11656	11664	-	10.378	9.29e-05	0.774	AGTAGTGCA
MIT_LM2		chr3-151664751-INS-10490	7290	7308	-	8.90798	9.47e-05	0.204	TGACCAGAAAAGGACATTA
REN_20		chr3-151664751-INS-10490	3018	3037	+	-5.97143	9.47e-05	0.656	GCAGTCTGCAGGTTGCAGAA
MIT_LM7		chr7-55763041-INS-54332	8113	8132	-	8.89571	9.53e-05	0.509	AGGCCAGGAGTTGGAGGAGG
EMBL_M1		chr20-31730454-INS-1425	641	654	+	9.80368	9.59e-05	0.566	CTCCACCTCCCGGG
EMBL_M1		chr7-55763041-INS-54332	21518	21531	+	9.80368	9.59e-05	0.566	CTCCACCTCCCGGG
EMBL_M1		chr7-55763041-INS-54332	30479	30492	-	9.80368	9.59e-05	0.566	CTCCACCTCCCGGG
EMBL_M1		chr7-55763041-INS-54332	14500	14513	-	9.79755	9.63e-05	0.566	TTCCACCATGTGGT
MIT_LM2		chr4-189232875-INS-2722	103	121	-	8.86503	9.67e-05	0.204	ACACCACCACAGAGCACAA
MIT_LM2		chr4-189232875-INS-2722	137	155	-	8.86503	9.67e-05	0.204	ACACCACCACAGAGCACAA
MIT_LM2		chr4-189235431-INS-205	166	184	-	8.86503	9.67e-05	0.204	ACACCACCACAGAGCACAA
MIT_LM2		chr4-189232875-INS-2722	205	223	-	8.86503	9.67e-05	0.204	ACACCACCACAGAGCACAA
MIT_LM2		chr4-189232875-INS-2722	239	257	-	8.86503	9.67e-05	0.204	ACACCACCACAGAGCACAA
MIT_LM2		chr4-189232875-INS-2722	274	292	-	8.86503	9.67e-05	0.204	ACACCACCACAGAGCACAA
MIT_LM2		chr4-189232875-INS-2722	308	326	-	8.86503	9.67e-05	0.204	ACACCACCACAGAGCACAA
MIT_LM2		chr4-189232875-INS-2722	342	360	-	8.86503	9.67e-05	0.204	ACACCACCACAGAGCACAA
MIT_LM2		chr4-189232875-INS-2722	376	394	-	8.86503	9.67e-05	0.204	ACACCACCACAGAGCACAA
MIT_LM2		chr4-189232875-INS-2722	444	462	-	8.86503	9.67e-05	0.204	ACACCACCACAGAGCACAA
MIT_LM2		chr4-189232875-INS-2722	853	871	-	8.86503	9.67e-05	0.204	ACACCACCACAGAGCACAA
MIT_LM2		chr4-189232875-INS-2722	955	973	-	8.86503	9.67e-05	0.204	ACACCACCACAGAGCACAA
MIT_LM2		chr4-189232875-INS-2722	1397	1415	-	8.86503	9.67e-05	0.204	ACACCACCACAGAGCACAA
MIT_LM2		chr4-189232875-INS-2722	1431	1449	-	8.86503	9.67e-05	0.204	ACACCACCACAGAGCACAA
MIT_LM2		chr4-189232875-INS-2722	1567	1585	-	8.86503	9.67e-05	0.204	ACACCACCACAGAGCACAA
MIT_LM2		chr4-189232875-INS-2722	1601	1619	-	8.86503	9.67e-05	0.204	ACACCACCACAGAGCACAA
MIT_LM2		chr4-189232875-INS-2722	1839	1857	-	8.86503	9.67e-05	0.204	ACACCACCACAGAGCACAA
MIT_LM2		chr4-189232875-INS-2722	1907	1925	-	8.86503	9.67e-05	0.204	ACACCACCACAGAGCACAA
MIT_LM2		chr4-189232875-INS-2722	1941	1959	-	8.86503	9.67e-05	0.204	ACACCACCACAGAGCACAA
MIT_LM2		chr4-189232875-INS-2722	2111	2129	-	8.86503	9.67e-05	0.204	ACACCACCACAGAGCACAA
MIT_LM2		chr4-189232875-INS-2722	2451	2469	-	8.86503	9.67e-05	0.204	ACACCACCACAGAGCACAA
MIT_LM2		chr4-189232875-INS-2722	2485	2503	-	8.86503	9.67e-05	0.204	ACACCACCACAGAGCACAA
MIT_LM2		chr4-189232875-INS-2722	2587	2605	-	8.86503	9.67e-05	0.204	ACACCACCACAGAGCACAA
MIT_LM2		chr4-189232875-INS-2722	2655	2673	-	8.86503	9.67e-05	0.204	ACACCACCACAGAGCACAA
MIT_LM2		chr4-189232875-INS-2722	2689	2707	-	8.86503	9.67e-05	0.204	ACACCACCACAGAGCACAA
MIT_LM7		chr7-55763041-INS-54332	48090	48109	+	8.85276	9.73e-05	0.512	AAGCTACCAGGAGGAGCTTT
MIT_LM2		chr7-55763041-INS-54332	4628	4646	+	8.82822	9.85e-05	0.207	TGAACTCCAGGAGGCAAAA
EMBL_M1		chr7-55763041-INS-54332	28520	28533	+	9.74847	9.88e-05	0.566	AGCACCCTGGAGGC
MIT_LM23		chr7-55763041-INS-54332	17967	17986	+	8.07975	9.89e-05	0.769	ATTCCCCCAGGGCTCGCTGA
EMBL_M1		chr7-55763041-INS-54332	31209	31222	+	9.73006	9.98e-05	0.566	CACCACCTTCTCGC
EMBL_M2		chr7-55763041-INS-54332	6776	6784	-	10.2561	9.99e-05	0.792	AGAACTGCT
EMBL_M2		chr7-55763041-INS-54332	32041	32049	+	10.2561	9.99e-05	0.792	AGAACTGCT
# FIMO (Find Individual Motif Occurrences): Version 5.5.5 compiled on Dec 6 2023 at 19:32:37
# The format of this file is described at https://meme-suite.org/meme/doc/fimo-output-format.html#tsv_results.
# fimo --oc . --verbosity 1 --bgfile TAD_INS_seq_true_pos_new_bg --thresh 1.0E-4 CTCFBSDB_PWM_new_bg.meme TAD_INS_seq_true_pos_new.fa
