# Supplementary material for: An integrative TAD catalog in lymphoblastoid cell lines discloses the functional impact of deletions and insertions in human genomes
Source: HighWire-hosted journal article supplement (doi:10.1101/gr.279419.124), 2024-12-01
Supplement: Supplemental_Table_S15.xlsx [file Supplemental_Table_S15.xlsx]

## Sheet: Table S16
Table S15. The loop locations of the Integrative Catalog
#chr1	x1	x2	chr2	y1	y2	name	score	strand1	strand2	color	observed	expectedBL	expectedDonut	expectedH	expectedV	fdrBL	fdrDonut	fdrH	fdrV	numCollapsed	centroid1	centroid2	radius
chr10	36890000	36900000	chr10	37750000	37760000	.	.	.	.	255255	109	45.4514	44.5791	43.2126	50.1683	1.76493e-09	4.01783e-09	4.03361e-09	0.000176557	1	36895000	37755000	0
chr10	73355000	73360000	chr10	73645000	73650000	.	.	.	.	255255	144	65.9876	57.7135	55.5837	81.1258	2.95606e-08	6.50758e-15	8.96071e-15	0.00285717	2	73355000	73645000	3536
chr10	133550000	133555000	chr10	133600000	133605000	.	.	.	.	255255	106	32.6348	44.1423	53.3074	53.6512	2.08107e-14	8.88343e-09	0.000221188	0.000229462	1	133552500	133602500	0
chr10	132690000	132695000	chr10	132960000	132965000	.	.	.	.	255255	104	50.7697	57.6787	58.2987	57.1956	0.000364349	0.000505359	0.000537809	0.000559582	1	132692500	132962500	0
chr10	131905000	131910000	chr10	131980000	131985000	.	.	.	.	255255	457	217.227	234.469	257.946	229.125	1.21721e-27	1.49658e-27	6.72782e-11	1.83579e-27	2	131905000	131982500	2500
chr10	20855000	20860000	chr10	21075000	21080000	.	.	.	.	255255	147	81.8114	70.3956	86.6259	67.6254	0.000708428	6.60036e-09	0.00105516	8.27632e-09	1	20857500	21077500	0
chr10	11430000	11435000	chr10	11470000	11475000	.	.	.	.	255255	440	143.292	148.039	157.519	195.751	0	0	0	2.25772e-23	11	11426136	11471590	19608
chr10	114300000	114305000	chr10	114790000	114795000	.	.	.	.	255255	226	87.7344	80.9972	100.581	82.8036	1.10568e-23	1.09161e-23	8.83945e-13	1.7622e-23	7	114303928	114785357	14374
chr10	52880000	52890000	chr10	55090000	55100000	.	.	.	.	255255	100	44.8966	48.4088	55.7877	49.2922	8.01243e-07	1.77113e-06	0.00845207	0.00839573	1	52885000	55095000	0
chr10	120945000	120950000	chr10	121605000	121610000	.	.	.	.	255255	165	51.4497	50.4767	63.0104	51.0929	9.76948e-23	9.69634e-23	9.26385e-14	1.57109e-22	11	120948863	121606590	14552
chr10	110135000	110140000	chr10	110550000	110555000	.	.	.	.	255255	118	46.5107	56.1356	74.7849	56.677	9.0143e-13	3.83111e-07	0.00491609	4.77265e-07	2	110137500	110555000	2500
chr10	101600000	101605000	chr10	101780000	101785000	.	.	.	.	255255	550	138.126	114.747	148.908	125.646	0	0	0	0	19	101603289	101778552	16595
chr10	122295000	122300000	chr10	122430000	122435000	.	.	.	.	255255	521	143.593	156.981	170.453	219.373	0	0	0	0	13	122294423	122435192	13060
chr10	117495000	117500000	chr10	118105000	118110000	.	.	.	.	255255	111	49.3886	49.7196	53.1889	59.1569	1.3518e-05	1.76627e-05	1.99594e-05	2.09107e-05	2	117500000	118110000	3536
chr10	103710000	103715000	chr10	103860000	103865000	.	.	.	.	255255	524	139.418	117.978	171.742	132.959	0	0	0	0	28	103715714	103862857	24852
chr10	30780000	30785000	chr10	31805000	31810000	.	.	.	.	255255	197	74.7768	77.6537	88.1986	103.248	7.63548e-25	1.18249e-14	1.65918e-14	1.04656e-06	2	30782500	31810000	2500
chr10	42750000	42760000	chr10	43100000	43110000	.	.	.	.	255255	290	148.904	141.175	133.075	170.437	2.08216e-17	2.71425e-17	3.70236e-17	7.94235e-07	2	42755000	43100000	5000
chr10	74585000	74590000	chr10	74820000	74825000	.	.	.	.	255255	186	87.1668	87.2754	113.16	87.5407	9.17205e-12	1.05251e-11	6.7766e-05	1.42232e-11	2	74595000	74820000	7906
chr10	87860000	87865000	chr10	88090000	88095000	.	.	.	.	255255	501	215.099	198.538	309.804	195.533	1.87895e-39	2.15296e-39	7.96355e-05	2.72877e-39	11	87866136	88097500	30220
chr10	17900000	17910000	chr10	18100000	18110000	.	.	.	.	255255	506	227.054	232.741	244.07	274.505	1.07515e-40	1.12188e-40	4.12476e-19	4.24865e-19	2	17910000	18105000	5000
chr10	70760000	70765000	chr10	70880000	70885000	.	.	.	.	255255	232	123.444	115.734	104.718	146.383	4.25539e-06	2.19553e-14	3.00241e-14	6.94977e-06	1	70762500	70882500	0
chr10	107405000	107410000	chr10	108785000	108790000	.	.	.	.	255255	57	23.5155	23.4972	23.7367	27.0244	6.99398e-05	0.000113268	0.000112159	0.0173495	1	107407500	108787500	0
chr10	46105000	46110000	chr10	46280000	46285000	.	.	.	.	255255	300	12.5606	18.088	30.9066	15.8948	0	0	0	0	8	46107500	46280000	17500
chr10	38780000	38790000	chr10	39260000	39270000	.	.	.	.	255255	58	24.2625	30.4331	27.0237	30.6589	4.26737e-05	0.0260007	0.0247874	0.0248109	2	38775000	39265000	10000
chr10	132220000	132225000	chr10	132635000	132640000	.	.	.	.	255255	82	29.6826	34.0908	35.028	37.2246	3.60932e-10	5.70774e-06	6.34704e-06	6.59965e-06	2	132222500	132640000	2500
chr10	92295000	92300000	chr10	92430000	92435000	.	.	.	.	255255	123	66.1403	59.8659	56.1452	69.9605	0.000560047	1.88039e-08	2.30601e-08	0.000826558	2	92297500	92430000	2500
chr10	95180000	95185000	chr10	95600000	95605000	.	.	.	.	255255	197	96.8076	93.4395	103.248	116.719	1.07891e-14	1.18249e-14	1.01964e-06	1.04656e-06	2	95185000	95602500	2500
chr10	110800000	110805000	chr10	110870000	110875000	.	.	.	.	255255	654	282.832	332.075	424.409	356.845	0	1.20264e-27	3.58777e-08	1.31319e-27	14	110804285	110890714	18688
chr10	45720000	45730000	chr10	50060000	50070000	.	.	.	.	255255	35	3.06772	5.50042	3.00206	2.36866	2.56641e-19	2.97081e-10	1.34174e-18	1.16912e-21	1	45725000	50065000	0
chr10	93550000	93555000	chr10	93815000	93820000	.	.	.	.	255255	172	82.6271	79.1522	101.831	82.1264	1.8321e-08	2.23634e-08	0.0054066	2.8107e-08	2	93555000	93815000	3536
chr10	44180000	44185000	chr10	44225000	44230000	.	.	.	.	255255	172	77.9691	88.9155	100.245	101.133	1.8321e-08	2.23634e-08	0.0054066	0.00551134	3	44180833	44229166	10673
chr10	39060000	39065000	chr10	39380000	39385000	.	.	.	.	255255	138	60.9259	73.4808	75.8618	76.5664	5.8604e-13	8.83489e-07	1.03676e-06	1.04435e-06	1	39062500	39382500	0
chr10	29995000	30000000	chr10	30380000	30385000	.	.	.	.	255255	130	59.4182	44.3993	63.7427	47.1066	1.68033e-10	3.20529e-17	4.56049e-05	4.49004e-17	2	29997500	30385000	2500
chr10	37855000	37860000	chr10	37970000	37975000	.	.	.	.	255255	174	55.5264	57.3113	54.3664	62.1775	1.88813e-26	1.83817e-26	3.00869e-26	1.47411e-16	1	37857500	37972500	0
chr10	32790000	32795000	chr10	33005000	33010000	.	.	.	.	255255	553	119.887	122.307	162.051	152.544	0	0	0	0	25	32798700	33007900	20678
chr10	62435000	62440000	chr10	63720000	63725000	.	.	.	.	255255	114	50.3624	54.992	56.9915	60.5045	2.82099e-06	3.61053e-06	4.17551e-06	4.38673e-06	3	62439166	63719166	3727
chr10	67855000	67860000	chr10	68295000	68300000	.	.	.	.	255255	202	86.2237	104.067	124.693	102.278	4.08255e-16	1.0175e-07	0.0302964	1.25937e-07	9	67857500	68302500	7071
chr10	11670000	11680000	chr10	13710000	13720000	.	.	.	.	255255	64	21.8007	27.9995	30.879	29.1059	3.02825e-07	0.00107307	0.000971353	0.000987327	1	11675000	13715000	0
chr10	90880000	90885000	chr10	91635000	91640000	.	.	.	.	255255	101	43.2954	42.5898	50.9327	54.462	2.06679e-07	2.57159e-07	0.00188997	0.00195411	1	90882500	91637500	0
chr10	73890000	73900000	chr10	74620000	74630000	.	.	.	.	255255	155	76.4839	83.31	89.6166	82.5583	1.2037e-10	0.000153341	0.000172212	0.000171753	1	73895000	74625000	0
chr10	26700000	26710000	chr10	27350000	27360000	.	.	.	.	255255	117	58.3786	60.0953	61.0644	74.7415	1.27917e-06	2.5118e-06	2.70075e-06	0.0195676	1	26705000	27355000	0
chr10	100670000	100675000	chr10	100740000	100745000	.	.	.	.	255255	373	113.433	125.269	150.344	140.658	0	0	0	0	9	100669166	100743055	8352
chr10	96400000	96405000	chr10	97695000	97700000	.	.	.	.	255255	39	5.6338	5.83799	6.12117	3.88702	5.44111e-14	2.77567e-13	3.57242e-13	1.51638e-19	1	96402500	97697500	0
chr10	100430000	100435000	chr10	100875000	100880000	.	.	.	.	255255	108	57.5523	50.9003	49.548	54.8862	5.88152e-05	7.90471e-05	8.72866e-05	9.09346e-05	2	100435000	100877500	2500
chr10	41720000	41725000	chr10	41755000	41760000	.	.	.	.	255255	267	149.435	95.3657	172.525	85.1921	1.78461e-12	3.24127e-39	0.000417082	5.9701e-39	1	41722500	41757500	0
chr10	30725000	30730000	chr10	31765000	31770000	.	.	.	.	255255	161	63.686	76.3569	95.9313	90.6041	9.49412e-13	1.06129e-12	4.73448e-06	4.81047e-06	1	30727500	31767500	0
chr10	93115000	93120000	chr10	93350000	93355000	.	.	.	.	255255	258	107.742	124.84	113.489	170.739	1.38893e-21	1.56239e-10	2.18478e-21	0.00384277	1	93117500	93352500	0
chr10	99845000	99850000	chr10	100240000	100245000	.	.	.	.	255255	239	108.137	95.2235	118.617	95.9154	3.05816e-16	2.77312e-28	4.75062e-16	4.704e-28	10	99849000	100237000	11511
chr10	91295000	91300000	chr10	91635000	91640000	.	.	.	.	255255	187	71.4038	69.1292	74.6116	68.1449	3.6967e-21	3.70189e-21	5.54345e-21	5.62201e-21	6	91297500	91635000	7500
chr10	102390000	102395000	chr10	102585000	102590000	.	.	.	.	255255	168	78.1568	78.8407	70.3401	111.864	1.29763e-07	1.61886e-07	1.13469e-14	0.0156344	1	102392500	102587500	0
chr10	45000000	45005000	chr10	45670000	45675000	.	.	.	.	255255	68	17.3964	22.765	24.7511	28.7757	5.53822e-13	1.25455e-08	3.40809e-05	3.51439e-05	3	45002500	45667500	7071
chr10	3480000	3485000	chr10	3780000	3785000	.	.	.	.	255255	115	56.1657	57.4802	65.6714	58.6245	1.63807e-06	2.08893e-06	0.0130437	2.56097e-06	4	3481250	3773750	8839
chr10	6110000	6115000	chr10	6200000	6205000	.	.	.	.	255255	323	151.59	150.257	202.68	161.688	8.52761e-27	8.9905e-27	0.000957035	7.7901e-13	4	6107500	6203750	5154
chr10	128260000	128270000	chr10	129970000	129980000	.	.	.	.	255255	132	62.7119	60.3646	65.7868	71.7682	2.89967e-05	2.05406e-10	6.35846e-05	6.31079e-05	3	128268333	129968333	7454
chr10	74420000	74425000	chr10	75020000	75025000	.	.	.	.	255255	195	79.7562	93.4189	96.6378	114.188	3.84396e-14	4.25359e-14	5.88692e-14	2.35236e-06	4	74418750	75021250	6374
chr10	45990000	46000000	chr10	49960000	49970000	.	.	.	.	255255	18	1.50121	1.58603	0.905737	0.732403	1.15499e-08	1.75044e-06	1.42356e-09	1.04414e-09	1	45995000	49965000	0
chr10	99390000	99395000	chr10	99710000	99715000	.	.	.	.	255255	190	87.4005	70.5913	77.138	81.422	8.52088e-13	3.03646e-22	4.60816e-22	1.31488e-12	4	99391250	99711250	6374
chr10	119205000	119210000	chr10	119415000	119420000	.	.	.	.	255255	484	93.1666	111.982	155.326	117.869	0	0	0	0	9	119204166	119422500	20276
chr10	55095000	55100000	chr10	55500000	55505000	.	.	.	.	255255	82	35.8736	38.074	38.2796	37.9292	4.18016e-06	5.70774e-06	6.34704e-06	6.59965e-06	3	55095833	55499166	6871
chr10	77165000	77170000	chr10	77710000	77715000	.	.	.	.	255255	280	90.1311	84.3914	123.885	91.0326	0	0	3.48355e-15	0	14	77169285	77711785	14398
chr10	55090000	55095000	chr10	57655000	57660000	.	.	.	.	255255	33	7.38583	6.67683	7.35069	6.42373	3.40072e-07	1.40296e-06	1.53584e-06	1.36742e-06	1	55092500	57657500	0
chr10	116790000	116795000	chr10	117175000	117180000	.	.	.	.	255255	524	161.976	133.822	146.138	173.324	0	0	0	0	25	116797700	117174500	16824
chr10	73260000	73265000	chr10	73640000	73645000	.	.	.	.	255255	197	73.1235	67.7966	73.7052	71.8392	7.63548e-25	7.46344e-25	1.16024e-24	1.20967e-24	8	73256875	73640000	15625
chr10	93080000	93085000	chr10	93290000	93295000	.	.	.	.	255255	427	191.443	176.844	203.224	238.161	4.04633e-40	4.38601e-40	1.96072e-20	1.89492e-20	16	93080000	93284687	18918
chr10	117855000	117860000	chr10	118105000	118110000	.	.	.	.	255255	178	79.0101	82.1415	83.3968	91.4156	8.07695e-10	9.59491e-10	1.22432e-09	1.24521e-09	6	117860833	118107500	8334
chr10	104250000	104260000	chr10	110070000	110080000	.	.	.	.	255255	61	19.7905	19.5171	23.3259	22.2539	3.92993e-06	3.67321e-09	1.01899e-05	9.75844e-06	1	104255000	110075000	0
chr10	62820000	62825000	chr10	63080000	63085000	.	.	.	.	255255	160	80.6971	71.3188	74.3274	91.8824	4.81155e-06	2.07215e-12	2.71626e-12	7.38841e-06	6	62826666	63078333	11606
chr10	45470000	45475000	chr10	45590000	45595000	.	.	.	.	255255	228	121.247	113.129	144.957	105.878	1.87771e-13	2.16444e-13	2.63137e-05	2.92796e-13	6	45466666	45591666	9204
chr10	27310000	27315000	chr10	36845000	36850000	.	.	.	.	255255	14	0.536961	0.414182	0.368476	0.457056	4.69294e-05	0.000165032	0.000116571	0.000104404	1	27312500	36847500	0
chr10	59625000	59630000	chr10	59805000	59810000	.	.	.	.	255255	433	72.0803	66.1226	92.6185	71.0851	0	0	0	0	17	59628970	59808088	19468
chr10	66180000	66190000	chr10	67520000	67530000	.	.	.	.	255255	139	76.132	65.7772	63.967	77.5357	1.02484e-06	1.9125e-06	2.24963e-06	0.0326384	2	66185000	67520000	5000
chr10	45920000	45925000	chr10	49890000	49895000	.	.	.	.	255255	13	0.361494	0.870514	0.0359529	0.246785	0.000448343	0.00157409	0.0011483	0.0010108	1	45922500	49892500	0
chr10	74730000	74740000	chr10	75600000	75610000	.	.	.	.	255255	52	17.9147	19.7282	21.032	22.3677	7.0865e-06	0.00617664	0.00579447	0.00571785	1	74735000	75605000	0
chr10	930000	935000	chr10	1045000	1050000	.	.	.	.	255255	281	108.908	115.089	120.544	123.325	7.21317e-29	6.95886e-29	1.11109e-28	2.0687e-15	11	930681	1046136	13251
chr10	75390000	75395000	chr10	76310000	76315000	.	.	.	.	255255	52	21.6935	21.0116	21.8019	24.5301	0.00178	0.00304368	0.00287217	0.00288741	1	75392500	76312500	0
chr10	3240000	3245000	chr10	4765000	4770000	.	.	.	.	255255	122	49.3463	53.2878	51.9288	65.6406	2.88232e-08	3.49194e-08	4.2564e-08	0.00120513	1	3242500	4767500	0
chr10	30725000	30730000	chr10	31080000	31085000	.	.	.	.	255255	103	45.5472	43.5953	47.6791	46.1907	5.63596e-08	6.93189e-08	8.17618e-08	8.7619e-08	2	30727500	31080000	2500
chr10	82455000	82460000	chr10	82505000	82510000	.	.	.	.	255255	115	51.7632	60.2811	59.9576	62.6138	1.63807e-06	2.08893e-06	2.42306e-06	0.0132428	1	82457500	82507500	0
chr10	115795000	115800000	chr10	116285000	116290000	.	.	.	.	255255	199	63.3482	67.8345	75.4619	78.3965	1.30712e-25	1.27588e-25	2.00563e-25	4.583e-15	9	115798611	116290833	9196
chr10	97915000	97920000	chr10	98040000	98045000	.	.	.	.	255255	309	106.556	107.307	115.476	113.677	7.30031e-39	6.6645e-39	1.16557e-38	1.1755e-38	20	97916750	98036750	17850
chr10	116680000	116685000	chr10	117175000	117180000	.	.	.	.	255255	249	73.235	66.9529	75.3796	82.9634	0	0	0	8.68631e-32	13	116681730	117176730	11571
chr10	42630000	42640000	chr10	43130000	43140000	.	.	.	.	255255	233	123.093	113.771	147.07	101.814	6.4266e-06	4.0323e-14	1.12682e-05	5.62438e-14	1	42635000	43135000	0
chr10	48655000	48660000	chr10	48775000	48780000	.	.	.	.	255255	206	109.44	100.319	134.291	88.9691	1.34471e-08	1.68808e-08	0.0125756	4.26368e-17	2	48657500	48775000	2500
chr10	72130000	72135000	chr10	72215000	72220000	.	.	.	.	255255	414	192.507	197.152	209.48	235.464	4.66309e-36	8.83661e-18	1.12107e-17	1.08167e-17	7	72133214	72221071	9395
chr10	96640000	96645000	chr10	96915000	96920000	.	.	.	.	255255	218	106.621	110.863	139.747	114.533	4.00731e-11	4.8058e-11	0.000573138	6.25925e-11	1	96642500	96917500	0
chr10	84265000	84270000	chr10	84370000	84375000	.	.	.	.	255255	327	137.602	136.312	179.558	137.135	5.41422e-28	5.62139e-28	1.19219e-13	8.39374e-28	9	84264166	84366388	14283
chr10	120220000	120225000	chr10	120735000	120740000	.	.	.	.	255255	56	20.2515	22.3914	23.6898	24.5339	0.000140175	0.000228682	0.000224934	0.000229555	1	120222500	120737500	0
chr10	23300000	23310000	chr10	24190000	24200000	.	.	.	.	255255	170	75.0521	86.387	95.9957	96.9119	4.88163e-15	2.10635e-07	2.49343e-07	2.53029e-07	1	23305000	24195000	0
chr10	80695000	80700000	chr10	81180000	81185000	.	.	.	.	255255	187	49.9747	55.791	64.7114	66.8141	3.53621e-32	3.39757e-32	5.54345e-21	5.62201e-21	6	80695833	81180000	12937
chr10	63870000	63875000	chr10	63975000	63980000	.	.	.	.	255255	208	84.909	79.8548	78.6245	91.7262	6.80826e-18	7.13095e-18	1.05498e-17	1.07091e-17	9	63870833	63977500	9718
chr10	45460000	45465000	chr10	46025000	46030000	.	.	.	.	255255	69	25.0797	23.1791	23.0779	27.0927	1.10234e-05	4.92415e-09	5.67202e-09	1.76291e-05	4	45465000	46030000	3536
chr10	102165000	102170000	chr10	102395000	102400000	.	.	.	.	255255	331	184.944	164.071	207.36	155.514	1.12837e-14	1.45474e-14	0.00014483	1.89679e-14	2	102170000	102400000	3536
chr10	48360000	48365000	chr10	48505000	48510000	.	.	.	.	255255	259	56.1846	59.0511	76.2788	65.2935	0	0	0	0	10	48364500	48509000	10308
chr10	43395000	43400000	chr10	43450000	43455000	.	.	.	.	255255	646	255.826	233.673	224.028	353.807	0	0	0	5.32765e-26	17	43402794	43449852	18142
chr10	110315000	110320000	chr10	110350000	110355000	.	.	.	.	255255	593	285.002	263.07	298.936	307.463	2.92534e-39	3.64979e-39	4.05955e-39	1.99108e-16	4	110316250	110352500	8004
chr10	12255000	12260000	chr10	12820000	12825000	.	.	.	.	255255	141	58.3968	76.8192	93.9887	71.7399	6.19642e-14	1.83642e-07	0.00707146	2.22781e-07	1	12257500	12822500	0
chr10	80140000	80145000	chr10	80215000	80220000	.	.	.	.	255255	248	109.669	109.402	135.218	152.509	1.08222e-18	1.15872e-18	1.51916e-08	1.54524e-08	2	80142500	80220000	2500
chr10	62435000	62440000	chr10	62590000	62595000	.	.	.	.	255255	352	170.569	126.085	155.749	132.202	2.66905e-19	5.95195e-36	4.16247e-19	9.37125e-36	8	62441875	62585625	20406
chr10	68215000	68220000	chr10	68295000	68300000	.	.	.	.	255255	547	239.981	251.021	283.46	300.366	0	6.24811e-28	7.12502e-28	7.16893e-28	19	68216710	68301447	16276
chr10	11780000	11785000	chr10	11985000	11990000	.	.	.	.	255255	279	106.421	79.8231	95.4047	100.663	3.34904e-28	0	0	5.26822e-28	16	11789375	11985312	13423
chr10	96405000	96410000	chr10	97035000	97040000	.	.	.	.	255255	168	70.9519	95.6652	100.682	101.679	7.72876e-15	1.61886e-07	0.0153615	0.0156344	4	96398750	97035000	9100
chr10	114300000	114310000	chr10	114460000	114470000	.	.	.	.	255255	1055	591.364	490.372	650.355	443.014	0	0	9.77814e-15	0	8	114308750	114433750	31474
chr10	35335000	35340000	chr10	35555000	35560000	.	.	.	.	255255	109	50.0732	52.0369	50.3392	60.1122	3.64311e-05	4.84625e-05	5.38913e-05	5.63752e-05	1	35337500	35557500	0
chr10	97460000	97465000	chr10	97550000	97555000	.	.	.	.	255255	335	139.38	145.228	168.615	163.322	1.88586e-30	1.92917e-30	2.61831e-15	2.75631e-15	6	97465833	97550833	8498
chr10	5440000	5450000	chr10	6290000	6300000	.	.	.	.	255255	103	50.9344	54.7869	56.7114	56.6482	0.00115992	0.00245172	0.00258229	0.00256925	1	5445000	6295000	0
chr10	32315000	32320000	chr10	32375000	32380000	.	.	.	.	255255	158	70.4841	75.8732	79.9931	94.4272	6.79277e-12	7.70738e-12	1.68381e-05	1.71578e-05	1	32317500	32377500	0
chr10	62435000	62440000	chr10	63155000	63160000	.	.	.	.	255255	279	107.583	71.3035	82.4743	87.0808	3.34904e-28	0	0	0	4	62440000	63156250	9100
chr10	91850000	91860000	chr10	92430000	92440000	.	.	.	.	255255	196	91.699	98.5304	96.2353	119.175	5.64279e-14	3.8271e-06	1.12863e-13	4.63179e-06	1	91855000	92435000	0
chr10	102830000	102835000	chr10	103240000	103245000	.	.	.	.	255255	373	144.177	153.137	179.595	154.673	0	0	2.68578e-24	2.82946e-24	6	102835000	103248333	9502
chr10	83670000	83680000	chr10	84320000	84330000	.	.	.	.	255255	87	40.6546	40.2851	47.6288	39.5149	0.00100766	0.00223188	0.00225334	0.00224426	1	83675000	84325000	0
chr10	95180000	95185000	chr10	95360000	95365000	.	.	.	.	255255	728	223.074	210.243	220.878	350.021	0	0	0	0	9	95187500	95364166	20276
chr10	90145000	90150000	chr10	90590000	90595000	.	.	.	.	255255	147	60.1501	56.9762	56.9821	61.7904	5.65201e-16	5.98943e-16	8.32732e-16	8.27632e-09	2	90147500	90595000	2500
chr10	93375000	93380000	chr10	93480000	93485000	.	.	.	.	255255	628	89.5056	92.2801	149.252	101.045	0	0	0	0	25	93376900	93485100	32406
chr10	67785000	67790000	chr10	68300000	68305000	.	.	.	.	255255	171	62.7763	49.3377	54.4209	60.0267	8.93909e-16	3.37815e-25	5.44773e-25	5.6462e-25	8	67790625	68301250	8221
chr10	22250000	22260000	chr10	22410000	22420000	.	.	.	.	255255	632	305.186	348.02	407.018	382.412	2.41251e-23	2.59817e-23	5.4999e-06	3.63762e-23	2	22255000	22420000	5000
chr10	125980000	125985000	chr10	126500000	126505000	.	.	.	.	255255	192	47.2082	49.4071	60.755	55.8881	0	1.65373e-34	2.76278e-34	3.00809e-34	9	125981944	126503055	10957
chr10	30725000	30730000	chr10	31485000	31490000	.	.	.	.	255255	128	46.982	52.3858	57.0385	64.4792	1.83172e-16	7.50717e-10	9.53841e-10	0.000110268	3	30727500	31494166	8334
chr10	120945000	120950000	chr10	121730000	121735000	.	.	.	.	255255	249	72.2298	62.7326	91.9063	62.9056	0	0	8.53068e-32	0	17	120946029	121734558	20556
chr10	130185000	130190000	chr10	131875000	131880000	.	.	.	.	255255	202	39.0688	31.253	38.3164	35.4804	0	0	0	0	17	130192794	131874264	14255
chr10	50360000	50365000	chr10	50625000	50630000	.	.	.	.	255255	154	74.6471	77.1016	77.4198	90.5616	8.54668e-11	9.85682e-11	8.33791e-05	8.4786e-05	3	50362500	50617500	15000
chr10	12255000	12260000	chr10	12660000	12665000	.	.	.	.	255255	364	161.983	174.885	233.842	196.695	3.39727e-22	4.06747e-22	8.33558e-09	8.13e-09	10	12261500	12656000	9124
chr10	133435000	133440000	chr10	133495000	133500000	.	.	.	.	255255	309	135.77	135.282	128.901	159.299	8.81642e-23	9.61496e-23	1.34102e-22	3.18131e-10	8	133444375	133501875	16512
chr10	35120000	35125000	chr10	35215000	35220000	.	.	.	.	255255	916	248.11	198.432	225.368	234.16	0	0	0	0	37	35128716	35206418	34941
chr10	45250000	45255000	chr10	45670000	45675000	.	.	.	.	255255	226	48.6792	56.9666	78.9089	69.5507	0	0	1.73225e-23	1.62143e-36	10	45250000	45670000	12748
chr10	75110000	75115000	chr10	75230000	75235000	.	.	.	.	255255	267	125.168	90.7345	106.114	102.326	1.78461e-12	3.24127e-39	3.86669e-24	3.89702e-24	11	75114772	75225227	17999
chr10	87855000	87860000	chr10	88270000	88275000	.	.	.	.	255255	299	114.729	128.761	169.054	131.94	3.66891e-35	4.87973e-20	1.54279e-08	6.78828e-20	9	87863055	88274722	15713
chr10	90745000	90750000	chr10	90860000	90865000	.	.	.	.	255255	374	159.647	136.507	150.714	190.68	9.75673e-25	0	0	1.55688e-24	15	90753500	90862166	14700
chr10	89790000	89800000	chr10	90650000	90660000	.	.	.	.	255255	345	182.854	156.114	217.436	142.18	2.23802e-17	2.74223e-17	5.19377e-06	5.71124e-33	1	89795000	90655000	0
chr10	58300000	58305000	chr10	58385000	58390000	.	.	.	.	255255	301	125.274	123.094	115.163	178.469	1.29987e-20	1.43926e-20	1.07581e-35	7.41181e-09	8	58293125	58391875	16226
chr10	71815000	71820000	chr10	72045000	72050000	.	.	.	.	255255	120	55.5072	59.2306	63.9194	68.5295	9.57121e-08	1.17942e-07	0.00246053	0.00249839	1	71817500	72047500	0
chr10	34665000	34670000	chr10	35210000	35215000	.	.	.	.	255255	79	36.0639	35.7093	44.9406	38.9887	2.7077e-05	3.83086e-05	0.0214359	0.022122	2	34670000	35215000	3536
chr10	105950000	105955000	chr10	106170000	106175000	.	.	.	.	255255	155	60.7622	64.6499	69.2525	69.1635	7.30266e-19	5.2629e-11	6.78261e-11	6.93216e-11	10	105955000	106180500	21915
chr10	72360000	72365000	chr10	73160000	73165000	.	.	.	.	255255	80	30.9708	26.7616	31.2821	26.2075	1.47468e-05	2.9052e-09	2.25714e-05	3.36917e-09	4	72363750	73161250	6374
chr10	14605000	14610000	chr10	14645000	14650000	.	.	.	.	255255	939	330.57	352.368	376.181	382.447	0	0	0	0	11	14605227	14652500	10365
chr10	2835000	2840000	chr10	3040000	3045000	.	.	.	.	255255	208	70.7596	61.3833	64.1854	72.5706	3.74415e-29	0	5.73693e-29	6.03901e-29	6	2840000	3042500	5590
chr10	91295000	91300000	chr10	91920000	91925000	.	.	.	.	255255	106	52.0539	44.136	53.6673	47.6957	0.000149485	8.88343e-09	0.000221188	1.14273e-08	6	91296666	91910833	11697
chr10	51005000	51010000	chr10	52215000	52220000	.	.	.	.	255255	109	46.4418	41.6801	39.5674	50.3409	8.83341e-10	1.04496e-09	1.26954e-09	5.63752e-05	10	51006000	52216000	13583
chr10	43670000	43675000	chr10	44385000	44390000	.	.	.	.	255255	255	49.3669	37.263	42.4521	46.8108	0	0	0	0	17	43676911	44386029	17770
chr10	48660000	48665000	chr10	49165000	49170000	.	.	.	.	255255	119	46.2559	50.4691	57.0002	61.0514	3.99403e-13	2.13288e-07	2.54282e-07	2.67282e-07	7	48666071	49174642	16676
chr10	70550000	70555000	chr10	70810000	70815000	.	.	.	.	255255	220	100.207	101.535	145.387	93.8003	1.42153e-11	1.6912e-11	0.000320639	1.77932e-21	3	70550833	70815833	3727
chr10	129885000	129890000	chr10	130125000	130130000	.	.	.	.	255255	85	34.0525	32.2552	41.0532	36.3505	5.63443e-07	7.49249e-07	0.00191147	8.85043e-07	2	129890000	130127500	2500
chr10	87410000	87420000	chr10	87500000	87510000	.	.	.	.	255255	59	24.0122	22.037	23.285	29.9326	1.98283e-05	5.37319e-05	4.89193e-05	0.0155892	2	87420000	87500000	7071
chr10	79560000	79565000	chr10	79930000	79935000	.	.	.	.	255255	251	74.6346	91.8142	87.2878	156.179	0	8.4593e-33	1.4569e-32	0.0171759	5	79550500	79929500	13153
chr10	12210000	12215000	chr10	12710000	12715000	.	.	.	.	255255	370	206.247	163.943	160.752	238.972	5.84759e-10	1.23683e-23	1.59094e-23	9.88977e-10	1	12212500	12712500	0
chr10	93005000	93010000	chr10	93350000	93355000	.	.	.	.	255255	215	93.1307	90.1997	76.4506	120.466	4.59305e-20	4.67487e-20	7.7575e-32	2.86273e-10	3	93005833	93354166	3728
chr10	22335000	22340000	chr10	22695000	22700000	.	.	.	.	255255	176	72.5538	89.7921	106.971	82.5099	2.18686e-17	2.80453e-09	0.00173148	3.61042e-09	1	22337500	22697500	0
chr10	13785000	13790000	chr10	14090000	14095000	.	.	.	.	255255	212	110.005	90.0355	112.413	96.069	8.01408e-10	4.14932e-19	1.23279e-09	6.33154e-19	3	13790833	14094166	3728
chr10	56470000	56475000	chr10	56820000	56825000	.	.	.	.	255255	120	59.8576	59.3417	58.9676	68.3199	9.57121e-08	1.17942e-07	1.4167e-07	0.00249839	1	56472500	56822500	0
chr10	123130000	123135000	chr10	123550000	123555000	.	.	.	.	255255	548	188.644	172.301	202.299	210.527	0	0	0	0	25	123138900	123556900	16862
chr10	42170000	42180000	chr10	43100000	43110000	.	.	.	.	255255	57	23.1053	16.0124	21.9675	16.6945	8.92382e-05	2.17388e-07	0.000210602	2.24575e-07	1	42175000	43105000	0
chr10	6580000	6585000	chr10	7415000	7420000	.	.	.	.	255255	45	16.5619	17.556	18.6819	19.4307	0.00160005	0.00280183	0.00255537	0.0026117	1	6582500	7417500	0
chr10	97405000	97410000	chr10	97550000	97555000	.	.	.	.	255255	162	76.1442	73.3118	83.3447	83.8269	4.85452e-13	5.39309e-13	3.0589e-06	3.11216e-06	2	97407500	97555000	2500
chr10	23155000	23160000	chr10	23290000	23295000	.	.	.	.	255255	420	121.327	103.418	127.804	125.084	0	0	0	0	10	23161000	23293000	11068
chr10	98370000	98375000	chr10	98570000	98575000	.	.	.	.	255255	105	49.917	56.4846	57.7397	60.4179	0.000234466	0.000322504	0.000346628	0.000359945	1	98372500	98572500	0
chr10	110770000	110775000	chr10	110840000	110845000	.	.	.	.	255255	374	140.784	187.462	214.896	210.621	0	1.14215e-24	2.36191e-10	2.30417e-10	1	110772500	110842500	0
chr10	125860000	125870000	chr10	127850000	127860000	.	.	.	.	255255	103	52.176	50.5789	54.2032	58.9889	0.00115992	0.00245172	0.00258229	0.00256925	1	125865000	127855000	0
chr10	88090000	88095000	chr10	88270000	88275000	.	.	.	.	255255	526	253.42	248.184	214.751	333.656	1.76979e-23	2.35437e-23	0	2.58516e-07	7	88111785	88271785	19298
chr10	103705000	103710000	chr10	104120000	104125000	.	.	.	.	255255	140	76.7565	68.9309	88.48	70.4004	2.5084e-07	3.11756e-07	0.0094614	3.75553e-07	1	103707500	104122500	0
chr10	35235000	35240000	chr10	35565000	35570000	.	.	.	.	255255	247	110.668	105.986	143.169	108.224	2.05588e-18	2.20776e-18	2.29091e-08	3.21003e-18	10	35235500	35561500	13601
chr10	75025000	75030000	chr10	75235000	75240000	.	.	.	.	255255	137	67.0023	52.6331	51.1483	70.0468	1.15319e-06	1.35588e-12	1.80507e-12	1.7246e-06	2	75025000	75237500	2500
chr10	133140000	133145000	chr10	133305000	133310000	.	.	.	.	255255	126	37.4257	34.5688	39.4134	34.322	2.79545e-23	3.14088e-23	1.52428e-15	4.36688e-23	4	133146250	133311250	11859
chr10	102165000	102170000	chr10	102355000	102360000	.	.	.	.	255255	542	231.107	240.463	291.728	264.418	0	0	9.45229e-27	9.50979e-27	12	102168750	102352083	12977
chr10	125980000	125985000	chr10	126095000	126100000	.	.	.	.	255255	220	110.894	106.614	128.832	107.231	1.42153e-11	1.6912e-11	0.000320639	2.21915e-11	1	125982500	126097500	0
chr10	95755000	95760000	chr10	96270000	96275000	.	.	.	.	255255	80	28.0369	32.1986	30.9855	41.5885	2.08165e-09	2.06401e-05	2.25714e-05	0.015348	2	95760000	96277500	5590
chr10	84540000	84545000	chr10	84610000	84615000	.	.	.	.	255255	210	115.405	99.6555	98.5908	100.161	2.09812e-09	2.58682e-09	3.21833e-09	3.2909e-09	1	84542500	84612500	0
chr10	46280000	46285000	chr10	47380000	47385000	.	.	.	.	255255	407	15.6364	16.3698	16.8507	37.9363	0	0	0	0	9	46284166	47380833	13438
chr10	50360000	50365000	chr10	50505000	50510000	.	.	.	.	255255	297	137.048	153.501	161.749	179.569	1.46138e-19	2.68628e-08	3.2468e-08	3.31095e-08	4	50361250	50501250	13807
chr10	112135000	112140000	chr10	112310000	112315000	.	.	.	.	255255	444	181.041	176.689	177.169	239.26	0	0	0	2.61359e-24	11	112135227	112312500	19381
chr10	59620000	59625000	chr10	59905000	59910000	.	.	.	.	255255	262	128.097	116.261	152.324	120.647	1.96388e-11	8.85247e-23	3.08305e-11	1.35834e-22	2	59622500	59910000	2500
chr10	117485000	117490000	chr10	117685000	117690000	.	.	.	.	255255	105	49.4122	51.0922	49.3224	58.5259	0.000234466	0.000322504	0.000346628	0.000359945	1	117487500	117687500	0
chr10	72745000	72750000	chr10	72795000	72800000	.	.	.	.	255255	194	89.9894	103.077	113.812	109.69	7.22201e-14	2.902e-06	3.41101e-06	3.50013e-06	1	72747500	72797500	0
chr10	68550000	68555000	chr10	68895000	68900000	.	.	.	.	255255	178	63.7251	60.3215	68.136	71.2393	4.75326e-18	3.53997e-28	6.98817e-18	7.18855e-18	3	68549166	68899166	3727
chr10	119690000	119695000	chr10	119730000	119735000	.	.	.	.	255255	567	217.866	220.43	300.334	200.051	0	0	1.46058e-32	0	13	119689807	119740192	17405
chr10	71895000	71900000	chr10	72045000	72050000	.	.	.	.	255255	332	170.929	146.327	161.137	175.737	7.01487e-15	1.66083e-29	1.12245e-14	1.17638e-14	14	71903214	72047857	24653
chr10	18650000	18660000	chr10	22620000	22630000	.	.	.	.	255255	84	23.2844	28.9972	46.1555	27.0079	2.92891e-16	2.05293e-10	0.00841249	1.90456e-10	1	18655000	22625000	0
chr10	89260000	89265000	chr10	89370000	89375000	.	.	.	.	255255	583	217.707	232.523	297.047	288.87	0	0	1.55109e-36	1.54902e-36	18	89270277	89376666	28725
chr10	96765000	96770000	chr10	96825000	96830000	.	.	.	.	255255	429	194.985	184.039	187.469	235.093	4.38943e-21	1.00034e-40	1.36355e-40	6.8927e-21	7	96766785	96827500	10715
chr10	133420000	133425000	chr10	133570000	133575000	.	.	.	.	255255	147	17.7026	15.1087	15.1975	17.2507	0	0	0	0	6	133426666	133572500	15834
chr10	93115000	93120000	chr10	93505000	93510000	.	.	.	.	255255	104	46.0545	54.9734	50.1185	54.8783	2.89248e-08	0.000505359	0.000537809	0.000559582	1	93117500	93507500	0
chr10	130185000	130190000	chr10	131785000	131790000	.	.	.	.	255255	121	34.636	29.1578	34.4269	31.0199	6.34108e-21	7.69104e-29	9.4885e-21	1.00604e-20	4	130192500	131786250	5154
chr10	108540000	108550000	chr10	108780000	108790000	.	.	.	.	255255	454	234.398	215.009	218.198	234.137	1.11169e-26	1.23222e-26	1.84665e-26	1.91938e-26	1	108545000	108785000	0
chr10	101210000	101215000	chr10	102075000	102080000	.	.	.	.	255255	47	14.1618	16.1884	18.2897	18.2605	1.34385e-06	0.000697375	0.000653737	0.000675832	1	101212500	102077500	0
chr10	123390000	123395000	chr10	123550000	123555000	.	.	.	.	255255	512	191.585	155.194	151.684	213.173	0	0	0	1.15e-42	15	123395833	123552500	16415
chr10	70165000	70170000	chr10	70360000	70365000	.	.	.	.	255255	188	91.8688	96.1933	89.6606	121.886	2.82809e-12	3.21485e-12	4.28191e-12	3.40579e-05	1	70167500	70362500	0
chr10	82810000	82815000	chr10	82965000	82970000	.	.	.	.	255255	191	82.6191	81.3395	93.5236	85.423	4.61966e-13	5.20267e-13	7.0405e-13	7.14689e-13	6	82804166	82964166	11784
chr10	62590000	62595000	chr10	63715000	63720000	.	.	.	.	255255	132	50.4655	60.9009	66.2079	75.0827	4.27142e-11	4.8987e-11	1.85989e-05	1.88481e-05	6	62602500	63718333	10035
chr10	77715000	77720000	chr10	77835000	77840000	.	.	.	.	255255	479	172.848	152.094	173.799	170.998	0	0	0	0	8	77718750	77840625	9291
chr10	28665000	28670000	chr10	29300000	29305000	.	.	.	.	255255	169	48.1348	53.9098	61.0952	70.5842	5.10383e-35	2.27631e-24	3.62299e-24	5.72033e-15	10	28669000	29305500	13647
chr10	58955000	58960000	chr10	59180000	59185000	.	.	.	.	255255	387	141.793	151.155	205.403	151.689	0	0	1.5425e-12	0	9	58951388	59180277	9162
chr10	13785000	13790000	chr10	14485000	14490000	.	.	.	.	255255	107	57.9448	45.3607	58.1974	49.4455	9.42874e-05	4.38405e-09	0.000139234	0.00014527	1	13787500	14487500	0
chr10	96640000	96645000	chr10	96715000	96720000	.	.	.	.	255255	808	313.225	314.913	448.851	338.892	0	0	1.46794e-31	0	23	96647717	96712717	60407
chr10	37140000	37145000	chr10	37195000	37200000	.	.	.	.	255255	159	33.3468	57.724	83.7039	78.1665	3.0467e-41	2.24964e-20	1.11037e-05	1.13004e-05	3	37152500	37202500	11180
chr10	4105000	4110000	chr10	4655000	4660000	.	.	.	.	255255	115	52.2967	54.3159	59.6184	72.4868	1.63807e-06	2.08893e-06	2.42306e-06	0.0132428	1	4107500	4657500	0
chr10	109910000	109915000	chr10	110565000	110570000	.	.	.	.	255255	122	51.8831	59.9586	65.9078	62.578	2.88232e-08	3.49194e-08	0.00118506	0.00120513	1	109912500	110567500	0
chr10	125045000	125050000	chr10	125625000	125630000	.	.	.	.	255255	111	35.4354	38.8692	45.625	48.7713	1.77326e-16	2.38658e-10	2.94895e-10	3.14245e-10	6	125046666	125630833	6719
chr10	26725000	26730000	chr10	26875000	26880000	.	.	.	.	255255	831	303.446	231.36	227.256	294.022	0	0	0	0	30	26732666	26869833	43994
chr10	102915000	102920000	chr10	103065000	103070000	.	.	.	.	255255	571	154.302	132.877	163.187	142.562	0	0	0	0	26	102920769	103063461	24339
chr10	38095000	38100000	chr10	38355000	38360000	.	.	.	.	255255	46	13.0009	12.8075	12.4453	19.2009	3.62543e-06	7.82143e-06	7.65922e-06	0.00135701	2	38095000	38357500	2500
chr10	114875000	114880000	chr10	115125000	115130000	.	.	.	.	255255	308	93.4864	79.9134	99.8043	92.1492	0	0	2.77157e-38	0	12	114875833	115126666	14264
chr10	7120000	7125000	chr10	7415000	7420000	.	.	.	.	255255	322	111.285	94.1681	107.229	126.734	0	0	0	2.60948e-26	11	7121590	7412954	10494
chr10	51960000	51965000	chr10	52215000	52220000	.	.	.	.	255255	175	96.5842	81.7822	86.0103	104.652	3.94222e-09	4.7547e-09	5.96746e-09	0.00237275	2	51967500	52217500	5000
chr10	117215000	117220000	chr10	118240000	118245000	.	.	.	.	255255	96	35.2864	39.696	45.6344	45.9755	1.31944e-10	5.74153e-06	6.44438e-06	6.88124e-06	5	117218500	118241500	8485
chr10	102165000	102170000	chr10	102225000	102230000	.	.	.	.	255255	755	372.183	342.427	419.561	336.773	0	0	6.12328e-22	0	14	102171071	102226428	24560
chr10	102925000	102930000	chr10	103490000	103495000	.	.	.	.	255255	115	44.628	57.7629	61.3546	71.3017	9.75869e-12	2.08893e-06	2.42306e-06	0.0132428	4	102921250	103487500	11792
chr10	101835000	101840000	chr10	102070000	102075000	.	.	.	.	255255	484	181.68	171.578	248.263	185.274	0	0	3.01677e-15	0	12	101838750	102071250	15104
chr10	15900000	15905000	chr10	16805000	16810000	.	.	.	.	255255	193	45.0576	50.9524	88.7653	50.3713	0	5.61146e-35	2.06122e-13	1.02972e-34	2	15902500	16817500	10000
chr10	62490000	62495000	chr10	62555000	62560000	.	.	.	.	255255	240	75.1977	87.7163	102.382	94.495	0	1.1944e-28	2.58086e-16	2.02986e-28	1	62492500	62557500	0
chr10	99430000	99435000	chr10	99710000	99715000	.	.	.	.	255255	226	90.2711	94.0588	118.059	116.838	1.10568e-23	1.09161e-23	8.83945e-13	8.87874e-13	6	99436666	99710000	13176
chr10	67660000	67670000	chr10	67770000	67780000	.	.	.	.	255255	1428	550.967	521.51	492.66	798.255	0	0	0	2.97566e-31	2	67665000	67780000	5000
chr10	27555000	27560000	chr10	28180000	28185000	.	.	.	.	255255	114	33.8791	33.5311	36.4697	39.2744	9.18928e-18	1.04933e-17	1.35843e-17	3.25389e-11	5	27556500	28179500	6325
chr10	9335000	9340000	chr10	10675000	10680000	.	.	.	.	255255	122	42.9617	38.5341	46.6734	44.0116	3.3012e-14	2.5001e-21	4.72687e-14	5.0406e-14	10	9336500	10678000	12298
chr10	110605000	110610000	chr10	110800000	110805000	.	.	.	.	255255	146	71.9503	70.1976	92.0771	66.0662	9.71216e-09	1.16528e-08	0.00147183	1.45186e-08	2	110607500	110807500	5000
chr10	120220000	120225000	chr10	120335000	120340000	.	.	.	.	255255	160	56.8677	57.2796	61.3943	61.891	9.16188e-21	9.22421e-21	2.71626e-12	2.78759e-12	5	120222500	120338500	9000
chr10	72360000	72365000	chr10	72870000	72875000	.	.	.	.	255255	299	138.087	94.0581	174.724	79.8665	4.38689e-20	0	1.54279e-08	0	3	72364166	72875833	3728
chr10	43135000	43140000	chr10	43395000	43400000	.	.	.	.	255255	146	70.6564	72.3228	94.1584	67.4543	9.71216e-09	1.16528e-08	0.00147183	1.45186e-08	1	43137500	43397500	0
chr10	37970000	37980000	chr10	38400000	38410000	.	.	.	.	255255	107	60.9766	42.2052	58.3788	39.954	0.000203654	1.657e-08	0.000447296	1.75842e-08	1	37975000	38405000	0
chr10	92515000	92520000	chr10	92875000	92880000	.	.	.	.	255255	95	29.6331	26.6784	28.2314	29.6623	1.18324e-15	1.6562e-15	1.9901e-15	2.0198e-15	5	92519500	92876500	8062
chr10	52810000	52820000	chr10	55260000	55270000	.	.	.	.	255255	99	52.4359	43.8289	46.5789	50.6594	0.00552723	3.3251e-06	3.35633e-06	0.0121662	1	52815000	55265000	0
chr10	43920000	43925000	chr10	44385000	44390000	.	.	.	.	255255	82	28.3634	29.9595	30.7638	35.5184	3.60932e-10	5.02111e-10	5.72475e-10	6.59965e-06	2	43922500	44385000	2500
chr10	91950000	91955000	chr10	92020000	92025000	.	.	.	.	255255	253	126.403	120.239	132.9	123.351	1.14852e-09	4.30179e-20	1.82264e-09	1.84084e-09	1	91952500	92022500	0
chr10	101300000	101305000	chr10	101440000	101445000	.	.	.	.	255255	230	65.6076	79.603	87.7547	109.882	1.58532e-38	4.53981e-25	7.34517e-25	9.45953e-14	2	101300000	101442500	2500
chr10	112720000	112725000	chr10	113380000	113385000	.	.	.	.	255255	116	42.7811	46.0298	47.2056	57.8675	4.45156e-12	5.03711e-12	6.3586e-12	1.47389e-06	3	112722500	113387500	5000
chr10	11175000	11180000	chr10	11685000	11690000	.	.	.	.	255255	100	39.8128	45.2889	53.7632	46.7808	3.88143e-07	4.87871e-07	0.00281337	6.04533e-07	2	11175000	11685000	3536
chr10	100335000	100340000	chr10	100430000	100435000	.	.	.	.	255255	987	215.669	230.912	250.024	320.453	0	0	0	0	18	100340277	100432777	16651
chr10	3780000	3785000	chr10	4030000	4035000	.	.	.	.	255255	247	116.233	118.135	130.984	134.165	2.05588e-18	2.20776e-18	2.29091e-08	2.33855e-08	3	3795833	4037500	14240
chr10	60115000	60120000	chr10	60440000	60445000	.	.	.	.	255255	223	97.7201	98.9473	110.088	108.281	2.90367e-12	3.41749e-12	4.50882e-12	4.53382e-12	17	60109264	60437500	20005
chr10	34990000	35000000	chr10	36880000	36890000	.	.	.	.	255255	60	24.9366	22.7791	23.5511	30.7206	0.00408059	2.44691e-05	2.248e-05	0.00940503	1	34995000	36885000	0
chr10	23155000	23160000	chr10	23525000	23530000	.	.	.	.	255255	156	63.222	63.7912	72.4024	76.9792	2.44449e-11	2.78998e-11	3.61166e-11	3.69255e-11	9	23159722	23529722	12970
chr10	30725000	30730000	chr10	31810000	31815000	.	.	.	.	255255	191	86.7269	66.2381	73.4413	91.7221	4.61966e-13	1.3057e-22	1.9969e-22	7.14689e-13	6	30729166	31806666	9316
chr10	60235000	60240000	chr10	60645000	60650000	.	.	.	.	255255	79	32.8266	33.8971	30.1958	48.8062	2.7077e-05	3.83086e-05	7.63943e-09	0.022122	2	60237500	60650000	2500
chr10	62680000	62685000	chr10	63080000	63085000	.	.	.	.	255255	111	38.5339	47.3181	45.9141	58.8868	1.77326e-16	2.38658e-10	2.94895e-10	2.09107e-05	1	62682500	63082500	0
chr10	11110000	11120000	chr10	11270000	11280000	.	.	.	.	255255	1064	603.763	531.648	555.936	656.143	0	0	0	9.02182e-16	5	11111000	11265000	20396
chr10	70460000	70465000	chr10	70540000	70545000	.	.	.	.	255255	561	182.357	168.804	198.845	180.768	0	0	0	0	24	70464166	70537291	26154
chr10	4850000	4855000	chr10	5430000	5435000	.	.	.	.	255255	128	43.5131	46.4197	53.8262	56.1943	1.83172e-16	1.95604e-16	9.53841e-10	1.0116e-09	4	4847500	5432500	7071
chr10	61745000	61750000	chr10	62255000	62260000	.	.	.	.	255255	190	93.3169	97.1731	106.103	117.456	8.52088e-13	1.36814e-05	1.5845e-05	1.62938e-05	6	61749166	62255000	14166
chr10	45250000	45255000	chr10	45460000	45465000	.	.	.	.	255255	251	64.4962	62.3199	88.0493	52.5549	0	0	1.4569e-32	0	9	45248055	45464722	10914
chr10	125855000	125860000	chr10	126180000	126185000	.	.	.	.	255255	113	54.0466	50.87	58.3965	46.9697	4.8059e-06	6.18008e-06	7.11132e-06	6.99546e-11	1	125857500	126182500	0
chr10	123580000	123585000	chr10	123895000	123900000	.	.	.	.	255255	168	76.376	70.1614	101.777	61.1446	7.72876e-15	8.3131e-15	0.0153615	9.69665e-24	1	123582500	123897500	0
chr10	32190000	32195000	chr10	32370000	32375000	.	.	.	.	255255	456	201.481	161.699	187.646	186.507	2.15272e-27	0	0	0	14	32195000	32363571	16264
chr10	31030000	31035000	chr10	31485000	31490000	.	.	.	.	255255	129	55.1297	64.1692	70.305	69.5611	3.29837e-10	6.37231e-05	7.04945e-05	7.17906e-05	2	31035000	31487500	2500
chr10	62455000	62460000	chr10	62525000	62530000	.	.	.	.	255255	453	221.725	251.769	274.515	239.143	1.17222e-26	2.13271e-10	2.5732e-10	1.78045e-26	2	62457500	62535000	7500
chr10	74125000	74130000	chr10	74230000	74235000	.	.	.	.	255255	237	115.029	96.0206	98.0306	136.766	1.0189e-15	1.48121e-27	1.5842e-15	1.16041e-06	1	74127500	74232500	0
chr10	106795000	106800000	chr10	107815000	107820000	.	.	.	.	255255	84	29.3831	33.6058	34.9927	36.9322	5.91332e-11	1.49493e-06	1.69072e-06	1.7524e-06	3	106794166	107819166	10672
chr10	112565000	112570000	chr10	113105000	113110000	.	.	.	.	255255	95	37.9729	41.4881	48.5212	43.8544	3.01508e-10	1.03247e-05	1.15112e-05	1.22839e-05	3	112564166	113119166	12133
chr10	57340000	57345000	chr10	58150000	58155000	.	.	.	.	255255	71	27.2311	24.181	29.0386	22.4457	2.65483e-06	7.29936e-10	4.13923e-06	8.04327e-10	2	57340000	58152500	2500
chr10	11780000	11790000	chr10	13070000	13080000	.	.	.	.	255255	127	69.6906	57.1945	65.359	62.0796	0.000245153	5.82608e-09	0.000543482	0.000534558	1	11785000	13075000	0
chr10	41820000	41830000	chr10	42670000	42680000	.	.	.	.	255255	58	10.6992	16.3308	21.702	18.6901	2.40194e-16	8.11335e-08	0.000102401	8.29544e-08	1	41825000	42675000	0
chr10	109880000	109885000	chr10	110280000	110285000	.	.	.	.	255255	184	98.5456	62.2876	72.2724	67.0973	8.8312e-05	4.2607e-20	6.28076e-20	6.42045e-20	6	109889166	110286666	14554
chr10	76545000	76550000	chr10	76980000	76985000	.	.	.	.	255255	95	28.2157	26.5641	28.2175	29.1643	1.18324e-15	1.6562e-15	1.9901e-15	2.0198e-15	8	76550625	76986875	12655
chr10	53600000	53610000	chr10	55740000	55750000	.	.	.	.	255255	98	48.1218	41.4896	43.703	43.1393	2.76034e-06	6.04936e-06	6.23509e-06	6.16059e-06	2	53605000	55740000	5000
chr10	89425000	89430000	chr10	89790000	89795000	.	.	.	.	255255	121	42.4074	35.7243	46.0717	33.6876	7.65811e-14	7.26435e-21	1.08585e-13	1.00604e-20	2	89427500	89787500	5000
chr10	88060000	88065000	chr10	88110000	88115000	.	.	.	.	255255	561	265.69	281.67	340.937	312.338	2.77667e-31	3.54156e-31	1.23517e-11	1.20723e-11	6	88070000	88109166	8208
chr10	112475000	112480000	chr10	113380000	113385000	.	.	.	.	255255	124	33.635	33.0078	41.5778	46.7597	2.49238e-22	2.83804e-22	8.63857e-15	9.13419e-15	6	112475000	113385000	7906
chr10	132380000	132390000	chr10	132450000	132460000	.	.	.	.	255255	1033	444.282	415.328	452.383	464.212	0	0	0	0	4	132390000	132450000	7071
chr10	89790000	89795000	chr10	90865000	90870000	.	.	.	.	255255	98	29.6078	23.7667	28.2655	28.4177	4.83708e-17	1.99e-23	8.18436e-17	8.50271e-17	9	89795277	90864166	8625
chr10	119745000	119750000	chr10	119855000	119860000	.	.	.	.	255255	380	181.236	180.228	200.303	213.006	2.53972e-26	2.94451e-26	2.44834e-11	2.37363e-11	13	119750576	119854423	16862
chr10	21485000	21490000	chr10	23040000	23045000	.	.	.	.	255255	118	55.8085	58.2913	75.6569	52.9051	3.06809e-07	3.83111e-07	0.00491609	4.77265e-07	1	21487500	23042500	0
chr10	85995000	86000000	chr10	86585000	86590000	.	.	.	.	255255	74	30.5094	32.7979	34.3933	35.5524	2.82006e-07	0.000678143	0.000701554	0.000718705	2	85997500	86585000	2500
chr10	85555000	85560000	chr10	86375000	86380000	.	.	.	.	255255	88	38.4427	30.1091	29.1559	40.5522	6.71786e-08	1.88339e-12	2.23652e-12	0.000496884	3	85550833	86379166	6872
chr10	96015000	96020000	chr10	96200000	96205000	.	.	.	.	255255	286	141.718	144.411	182.215	152.988	8.43218e-17	9.69463e-17	1.50713e-06	1.31206e-16	10	96019500	96215500	18248
chr10	102915000	102920000	chr10	103240000	103245000	.	.	.	.	255255	502	128.648	153.747	166.645	164.39	0	0	0	0	17	102915147	103247500	16123
chr10	62435000	62440000	chr10	63080000	63085000	.	.	.	.	255255	157	78.0118	75.7899	80.2938	85.1754	1.68087e-05	1.4692e-11	2.53625e-05	2.58044e-05	2	62435000	63085000	3536
chr10	68990000	69000000	chr10	69220000	69230000	.	.	.	.	255255	998	537.546	471.959	618.731	506.184	3.46859e-36	0	5.33513e-09	5.3685e-36	9	69001666	69217222	18088
chr10	63525000	63530000	chr10	63725000	63730000	.	.	.	.	255255	120	60.0447	56.6814	63.0191	67.5002	9.57121e-08	1.17942e-07	0.00246053	0.00249839	1	63527500	63727500	0
chr10	3780000	3785000	chr10	3870000	3875000	.	.	.	.	255255	529	252.884	249.84	308.645	311.625	4.1563e-24	5.49977e-24	1.21846e-07	1.20086e-07	2	3782500	3870000	2500
chr10	50430000	50435000	chr10	50505000	50510000	.	.	.	.	255255	572	209.199	236.507	272.108	309.384	0	0	8.86575e-34	3.32986e-13	9	50425277	50503055	9557
chr10	92085000	92090000	chr10	92435000	92440000	.	.	.	.	255255	598	123.15	153.003	186.843	186.608	0	0	0	0	23	92082065	92434021	15510
chr10	88945000	88950000	chr10	89565000	89570000	.	.	.	.	255255	63	25.1461	25.4362	28.3981	28.1615	0.000498657	0.000787288	0.000785075	0.000800477	2	88942500	89565000	5590
chr10	27240000	27245000	chr10	28535000	28540000	.	.	.	.	255255	43	12.4066	13.5	13.9098	15.464	6.01542e-05	0.000123595	0.000113506	0.000111038	1	27242500	28537500	0
chr10	41820000	41830000	chr10	43520000	43530000	.	.	.	.	255255	44	11.3965	10.8942	13.2578	13.8472	4.18636e-08	1.73574e-07	7.62736e-05	6.58277e-05	1	41825000	43525000	0
chr10	117210000	117215000	chr10	117440000	117445000	.	.	.	.	255255	140	60.8358	55.5637	74.8352	54.3472	1.31882e-13	1.43884e-13	3.72231e-07	2.11121e-13	2	117220000	117442500	7500
chr10	62610000	62615000	chr10	62680000	62685000	.	.	.	.	255255	628	292.865	285.519	381.063	312.071	0	0	1.64547e-22	1.57798e-22	5	62612500	62684500	8602
chr10	110745000	110750000	chr10	111200000	111205000	.	.	.	.	255255	92	33.5614	47.5529	49.7908	51.1175	3.29262e-09	5.60372e-05	0.0446559	0.0455551	2	110747500	111205000	2500
chr10	89035000	89040000	chr10	89070000	89075000	.	.	.	.	255255	262	130.632	140.875	156.392	128.404	1.96388e-11	2.43739e-11	0.00147258	3.12091e-11	2	89037500	89075000	2500
chr10	29995000	30000000	chr10	30590000	30595000	.	.	.	.	255255	103	33.9946	33.7367	42.3455	35.5022	3.20628e-13	3.9193e-13	8.17618e-08	5.14931e-13	2	30000000	30592500	2500
chr10	114550000	114555000	chr10	114875000	114880000	.	.	.	.	255255	183	57.0548	65.4872	80.8631	68.2704	2.24246e-30	9.53131e-20	7.76403e-11	1.42877e-19	5	114553500	114879500	6325
chr10	36395000	36400000	chr10	37585000	37590000	.	.	.	.	255255	45	7.46564	7.57403	7.62207	7.58062	3.76032e-15	1.53841e-14	2.2652e-14	1.93826e-14	1	36397500	37587500	0
chr10	71895000	71900000	chr10	72340000	72345000	.	.	.	.	255255	250	78.646	72.9898	69.6086	112.052	2.19572e-32	0	0	4.6008e-19	6	71896666	72335000	12528
chr10	64735000	64740000	chr10	66180000	66185000	.	.	.	.	255255	65	24.2632	23.9597	27.0807	23.8769	1.19477e-07	1.88203e-07	0.000235634	2.00585e-07	4	64733750	66178750	6374
chr10	121820000	121825000	chr10	121885000	121890000	.	.	.	.	255255	411	206.343	204.497	200.862	211.463	2.74675e-17	3.6046e-17	4.55797e-17	4.39878e-17	6	121820833	121897500	14240
chr10	17650000	17660000	chr10	22310000	22320000	.	.	.	.	255255	58	19.0141	21.7332	26.9949	22.1088	2.18713e-08	0.000113719	0.0247874	0.00010322	3	17655000	22325000	10000
chr10	98465000	98470000	chr10	98660000	98665000	.	.	.	.	255255	443	75.9217	72.805	77.6757	95.8109	0	0	0	0	16	98467812	98665625	16313
chr10	43405000	43410000	chr10	44960000	44965000	.	.	.	.	255255	52	16.9295	15.8918	16.4481	18.1149	7.56956e-06	1.34119e-05	1.28023e-05	1.36343e-05	1	43407500	44962500	0
chr10	73525000	73530000	chr10	73640000	73645000	.	.	.	.	255255	854	151.371	139.899	163.931	166.651	0	0	0	0	26	73534230	73641346	20299
chr10	129030000	129035000	chr10	130110000	130115000	.	.	.	.	255255	58	24.2592	22.3613	30.056	19.2554	3.3902e-05	5.4965e-05	0.0107813	5.58089e-08	3	129030833	130122500	10138
chr10	110615000	110620000	chr10	110650000	110655000	.	.	.	.	255255	355	168.578	191.72	230.06	177.041	5.24829e-20	6.40086e-20	1.62751e-07	8.54796e-20	1	110617500	110652500	0
chr10	38020000	38025000	chr10	42625000	42630000	.	.	.	.	255255	235	5.17325	4.34016	3.92655	5.78071	0	0	0	0	4	38020000	42627500	7500
chr10	102165000	102170000	chr10	102480000	102485000	.	.	.	.	255255	260	132.873	123.433	124.372	134.474	4.97391e-11	6.2154e-11	7.83188e-11	7.92111e-11	2	102170000	102480000	3536
chr10	82810000	82820000	chr10	84210000	84220000	.	.	.	.	255255	90	43.5558	44.5459	44.2189	48.1886	0.000236664	0.000525393	0.000532874	0.000531138	1	82815000	84215000	0
chr10	72360000	72365000	chr10	72830000	72835000	.	.	.	.	255255	548	86.88	76.1788	120.988	72.5179	0	0	0	0	15	72365500	72833833	17052
chr10	5445000	5450000	chr10	5875000	5880000	.	.	.	.	255255	92	33.0736	38.1915	52.4908	39.6507	3.29262e-09	4.19704e-09	0.0446559	6.50134e-05	2	5445000	5875000	3536
chr10	80695000	80700000	chr10	81015000	81020000	.	.	.	.	255255	209	74.0157	78.8548	93.0104	91.4928	1.47003e-29	3.52905e-18	5.24156e-18	5.31651e-18	7	80700357	81017500	10227
chr10	60820000	60825000	chr10	60960000	60965000	.	.	.	.	255255	433	159.665	155.219	171.453	186.795	4.437e-42	4.755e-42	6.494e-42	6.963e-42	15	60818166	60963166	14349
chr10	89800000	89810000	chr10	111990000	112000000	.	.	.	.	255255	17	3.7177	2.71968	2.22514	2.30907	0.0135439	0.00476664	0.000391169	0.000285207	1	89805000	111995000	0
chr10	132455000	132460000	chr10	132635000	132640000	.	.	.	.	255255	581	97.9991	89.9583	112.763	119.293	0	0	0	0	24	132462500	132639791	19974
chr10	114470000	114475000	chr10	114545000	114550000	.	.	.	.	255255	607	198.222	178.048	206.761	203.958	0	0	0	0	17	114478970	114544852	24652
chr10	80380000	80385000	chr10	80440000	80445000	.	.	.	.	255255	442	148.033	129.771	160.882	128.863	0	0	0	0	8	80385625	80440625	12022
chr10	69010000	69015000	chr10	69495000	69500000	.	.	.	.	255255	97	35.9571	33.4804	31.7	44.9605	5.77388e-11	7.2646e-11	8.95306e-11	3.80591e-06	2	69012500	69495000	2500
chr10	22335000	22340000	chr10	22620000	22625000	.	.	.	.	255255	206	95.4408	107.902	133.989	95.8224	2.71645e-17	1.68808e-08	0.0125756	4.26368e-17	2	22337500	22625000	2500
chr10	101820000	101830000	chr10	102390000	102400000	.	.	.	.	255255	168	83.9317	84.2319	104.877	78.4941	3.16606e-07	5.51619e-07	0.0357407	6.57778e-07	2	101820000	102395000	5000
chr10	28625000	28630000	chr10	29300000	29305000	.	.	.	.	255255	111	44.3398	33.5584	31.0214	53.01	2.04654e-10	2.07579e-16	2.64705e-16	2.09107e-05	2	28627500	29305000	2500
chr10	79245000	79250000	chr10	79280000	79285000	.	.	.	.	255255	933	432.625	466.789	431.563	475.842	0	0	0	0	5	79244500	79284500	9899
chr10	32255000	32260000	chr10	32345000	32350000	.	.	.	.	255255	589	176.316	178.737	245.896	211.081	0	0	4.48042e-38	0	26	32260000	32351538	26082
chr10	42785000	42790000	chr10	43460000	43465000	.	.	.	.	255255	56	23.7674	22.0268	22.9703	27.7096	0.000140175	0.000228682	0.000224934	0.0267036	2	42785000	43460000	3536
chr10	14530000	14540000	chr10	14820000	14830000	.	.	.	.	255255	1139	430.818	492.936	496.168	718.219	0	0	0	1.31097e-25	1	14535000	14825000	0
chr10	12260000	12270000	chr10	12480000	12490000	.	.	.	.	255255	867	432.004	440.21	554.219	459.491	0	0	2.99777e-15	0	3	12255000	12485000	10000
chr10	87815000	87820000	chr10	89240000	89245000	.	.	.	.	255255	59	17.2248	16.2159	18.5655	16.5525	1.031e-08	1.88724e-08	1.91826e-08	2.06667e-08	1	87817500	89242500	0
chr10	79530000	79535000	chr10	80225000	80230000	.	.	.	.	255255	30	1.64548	2.18247	2.5403	2.51128	1.36088e-19	1.72278e-16	7.68149e-14	1.1501e-13	2	79530000	80230000	3536
chr10	91490000	91500000	chr10	91630000	91640000	.	.	.	.	255255	814	405.715	428.751	435.564	455.551	6.20776e-33	6.53024e-33	9.07151e-33	9.2104e-33	2	91495000	91625000	10000
chr10	132230000	132235000	chr10	132615000	132620000	.	.	.	.	255255	115	36.7203	56.6135	63.0715	54.5043	3.34232e-18	2.08893e-06	0.0130437	2.56097e-06	2	132227500	132625000	9014
chr10	46320000	46325000	chr10	46540000	46545000	.	.	.	.	255255	129	30.7026	50.6621	43.9592	61.7714	1.11463e-33	3.84441e-10	1.06029e-16	7.17906e-05	2	46322500	46540000	2500
chr10	13790000	13795000	chr10	13990000	13995000	.	.	.	.	255255	154	72.8878	68.0061	91.0048	68.8568	8.54668e-11	9.85682e-11	8.33791e-05	1.28774e-10	3	13792500	14000833	8333
chr10	17670000	17680000	chr10	31340000	31350000	.	.	.	.	255255	28	5.85888	7.27132	7.64609	6.41789	3.50043e-06	0.000834362	0.00104154	0.000891864	1	17675000	31345000	0
chr10	53120000	53125000	chr10	53155000	53160000	.	.	.	.	255255	287	142.843	154.785	143.013	156.861	4.80588e-17	9.04682e-07	7.38194e-17	1.10125e-06	1	53122500	53157500	0
chr10	72420000	72425000	chr10	72465000	72470000	.	.	.	.	255255	174	82.709	91.1231	95.8479	95.8789	6.60978e-09	8.00871e-09	1.00031e-08	1.01725e-08	2	72417500	72460000	9014
chr10	106795000	106800000	chr10	106980000	106985000	.	.	.	.	255255	571	171.531	160.567	189.772	182.127	0	0	0	0	16	106798125	106981250	14644
chr10	77845000	77850000	chr10	78025000	78030000	.	.	.	.	255255	153	82.6899	66.1015	83.7059	74.0635	8.13871e-05	1.83739e-10	0.000122301	2.38137e-10	5	77852500	78027500	15811
chr10	89790000	89795000	chr10	90785000	90790000	.	.	.	.	255255	116	53.8508	44.916	67.2795	42.6622	9.46687e-07	5.03711e-12	0.00952368	6.79382e-12	1	89792500	90787500	0
chr10	92140000	92145000	chr10	92205000	92210000	.	.	.	.	255255	211	102.785	116.468	134.055	123.097	1.30051e-09	1.59701e-09	0.0037753	0.00380782	3	92142500	92212500	5000
chr10	110745000	110750000	chr10	111595000	111600000	.	.	.	.	255255	55	11.1482	15.3716	15.2816	20.616	2.88159e-14	4.82889e-10	5.76193e-10	0.000445689	2	110745000	111597500	2500
chr10	32250000	32255000	chr10	32440000	32445000	.	.	.	.	255255	157	67.4263	76.5011	85.3462	88.0912	1.29497e-11	1.4692e-11	2.53625e-05	2.58044e-05	2	32247500	32442500	5000
chr10	4955000	4960000	chr10	5005000	5010000	.	.	.	.	255255	219	73.0395	68.6131	58.0274	60.9245	1.0229e-33	9.61497e-34	0	0	1	4957500	5007500	0
chr10	26335000	26340000	chr10	26725000	26730000	.	.	.	.	255255	216	91.5476	84.4591	118.089	77.6946	2.20022e-20	2.23863e-20	1.70427e-10	3.48979e-20	9	26338611	26728055	21119
chr10	27445000	27450000	chr10	28180000	28185000	.	.	.	.	255255	93	31.3719	38.5639	44.7872	40.4297	1.50174e-09	1.91329e-09	3.52623e-05	3.77167e-05	1	27447500	28182500	0
chr10	84160000	84170000	chr10	86410000	86420000	.	.	.	.	255255	60	27.908	24.0875	30.3442	21.2547	0.00408059	2.44691e-05	0.00929498	2.18399e-05	1	84165000	86415000	0
chr10	23530000	23535000	chr10	23695000	23700000	.	.	.	.	255255	150	75.8169	70.2317	67.2966	75.0328	9.66098e-10	1.13633e-09	1.43592e-09	1.44534e-09	3	23527500	23700833	10138
chr10	73095000	73100000	chr10	73160000	73165000	.	.	.	.	255255	637	250.637	250.22	282.791	303.868	0	0	0	0	16	73100000	73158437	22520
chr10	88215000	88220000	chr10	88385000	88390000	.	.	.	.	255255	176	84.7204	91.9264	87.6387	114.93	2.33967e-09	2.80453e-09	3.54131e-09	0.00177121	1	88217500	88387500	0
chr10	71895000	71900000	chr10	72220000	72225000	.	.	.	.	255255	161	64.9109	63.5656	70.9935	70.3593	9.49412e-13	1.06129e-12	1.39706e-12	1.43503e-12	3	71897500	72222500	5000
chr10	69640000	69645000	chr10	69715000	69720000	.	.	.	.	255255	225	110.081	114.081	100.52	133.699	9.82582e-13	1.14866e-12	1.52522e-12	7.09193e-05	2	69647500	69717500	5000
chr10	96855000	96860000	chr10	97020000	97025000	.	.	.	.	255255	145	74.6799	71.8805	70.2007	87.945	1.70152e-08	2.05306e-08	2.52666e-08	0.00207428	3	96850833	97019166	13744
chr10	115700000	115705000	chr10	116285000	116290000	.	.	.	.	255255	116	44.5517	47.0314	47.6621	49.9046	4.45156e-12	5.03711e-12	6.3586e-12	1.47389e-06	6	115705833	116289166	8498
chr10	2930000	2935000	chr10	3040000	3045000	.	.	.	.	255255	405	100.589	104.348	133.069	125.153	0	0	0	0	22	2932727	3044545	18700
chr10	21505000	21510000	chr10	22245000	22250000	.	.	.	.	255255	88	31.7207	38.2961	41.194	40.1543	6.71786e-08	8.73523e-08	0.00047259	0.000496884	2	21507500	22240000	7500
chr10	113875000	113880000	chr10	114100000	114105000	.	.	.	.	255255	260	119.615	122.557	115.367	166.177	3.48957e-22	6.2154e-11	5.48088e-22	0.00242412	3	113875833	114100833	3727
chr10	31030000	31035000	chr10	31760000	31765000	.	.	.	.	255255	106	50.3619	57.8626	58.3589	59.0005	0.000149485	0.00020399	0.000221188	0.000229462	1	31032500	31762500	0
chr10	66180000	66190000	chr10	67770000	67780000	.	.	.	.	255255	98	49.2837	40.1394	47.4398	37.3041	0.00793501	6.04936e-06	6.23509e-06	1.05103e-10	1	66185000	67775000	0
chr10	84430000	84435000	chr10	84530000	84535000	.	.	.	.	255255	243	104.813	101.978	98.1728	131.69	2.59712e-17	2.81907e-17	4.05153e-17	1.17155e-07	5	84429500	84536500	8062
chr10	58265000	58270000	chr10	59895000	59900000	.	.	.	.	255255	52	14.0618	13.2144	17.2058	13.779	6.59504e-09	1.52938e-08	1.28023e-05	1.51204e-08	1	58267500	59897500	0
chr10	110075000	110080000	chr10	110410000	110415000	.	.	.	.	255255	119	45.6596	49.3651	55.9183	43.4413	3.99403e-13	2.13288e-07	2.54282e-07	6.06909e-13	3	110077500	110412500	5000
chr10	64040000	64045000	chr10	66180000	66185000	.	.	.	.	255255	151	31.4991	33.7435	38.8666	43.704	2.22433e-36	2.5197e-36	4.22575e-26	4.27189e-26	10	64040000	66182500	15207
chr10	45350000	45355000	chr10	45665000	45670000	.	.	.	.	255255	137	60.9541	58.8037	50.0615	86.1335	1.22627e-12	1.35588e-12	1.80507e-12	0.0221025	2	45355000	45672500	5590
chr10	31320000	31330000	chr10	31480000	31490000	.	.	.	.	255255	631	313.602	299.085	342.345	333.527	3.72205e-23	0	5.52138e-23	5.61975e-23	4	31325000	31487500	10308
chr10	44930000	44935000	chr10	44975000	44980000	.	.	.	.	255255	763	205.193	219.713	289.826	296.8	0	0	0	0	16	44933437	44983750	14977
chr10	22245000	22250000	chr10	22985000	22990000	.	.	.	.	255255	175	69.373	72.3746	73.358	93.8239	4.63977e-17	4.82844e-17	6.82163e-17	6.0648e-09	12	22251666	22988333	24180
chr10	38085000	38090000	chr10	42560000	42565000	.	.	.	.	255255	203	5.19939	4.50931	4.57607	5.01604	0	0	0	0	5	38089500	42558500	13601
chr10	39410000	39415000	chr10	39460000	39465000	.	.	.	.	255255	158	71.0615	80.6829	78.6889	91.133	6.79277e-12	1.46642e-05	1.68381e-05	1.71578e-05	8	39383750	39472500	36250
chr10	105795000	105800000	chr10	106185000	106190000	.	.	.	.	255255	94	44.1391	42.3792	50.0584	45.3562	1.37618e-05	1.83159e-05	0.0239461	2.1609e-05	3	105795833	106184166	6871
chr10	98750000	98755000	chr10	99245000	99250000	.	.	.	.	255255	126	46.5437	55.9667	62.6742	71.2002	1.06919e-15	2.80017e-09	0.000248754	0.000253445	5	98750500	99247500	8602
chr10	75395000	75400000	chr10	76545000	76550000	.	.	.	.	255255	31	5.20583	5.80402	5.07538	8.64674	2.94022e-08	1.3599e-07	1.62966e-07	0.000961784	1	75397500	76547500	0
chr10	52885000	52890000	chr10	53600000	53605000	.	.	.	.	255255	134	62.3125	58.9346	64.821	60.5589	4.95107e-06	1.1904e-11	7.31468e-06	1.69198e-11	5	52885500	53600500	8246
chr10	62435000	62440000	chr10	62820000	62825000	.	.	.	.	255255	158	64.3557	63.9453	74.8121	72.8309	6.79277e-12	7.70738e-12	1.00412e-11	1.02796e-11	4	62438750	62822500	5154
chr10	122340000	122345000	chr10	122430000	122435000	.	.	.	.	255255	516	168.349	183.794	190.876	235.782	0	0	0	0	13	122345961	122434807	11767
chr10	79820000	79825000	chr10	79925000	79930000	.	.	.	.	255255	44	7.9137	10.619	9.99964	15.9452	4.27184e-11	1.38932e-07	1.47956e-07	0.00489468	3	79829166	79929166	6871
chr10	59620000	59625000	chr10	60435000	60440000	.	.	.	.	255255	92	40.2032	41.4412	44.5524	48.6211	4.11806e-05	5.60372e-05	6.08339e-05	6.50134e-05	2	59625000	60435000	3536
chr10	67785000	67790000	chr10	68205000	68210000	.	.	.	.	255255	195	96.0448	72.8628	88.4947	77.0353	3.84396e-14	4.26146e-24	5.88692e-14	6.86852e-24	1	67787500	68207500	0
chr10	3770000	3780000	chr10	4650000	4660000	.	.	.	.	255255	254	89.6983	109.684	90.7332	166.726	1.8456e-33	7.58883e-20	3.81982e-33	0.0160814	2	3780000	4655000	5000
chr10	13660000	13665000	chr10	13775000	13780000	.	.	.	.	255255	819	178.62	155.574	175.679	232.495	0	0	0	0	19	13660394	13775657	17090
chr10	95755000	95760000	chr10	95790000	95795000	.	.	.	.	255255	715	345.315	380.095	379.6	354.627	1.9991e-41	2.5774e-41	2.8176e-41	2.6807e-41	1	95757500	95792500	0
chr10	22570000	22575000	chr10	22985000	22990000	.	.	.	.	255255	561	168.652	172.691	161.575	257.938	0	0	0	4.01453e-31	15	22571166	22986500	18693
chr10	18650000	18660000	chr10	20000000	20010000	.	.	.	.	255255	183	99.0928	84.7048	95.3848	94.8302	0.00026344	2.2442e-10	2.73555e-10	2.80778e-10	2	18655000	20000000	5000
chr10	95290000	95300000	chr10	96270000	96280000	.	.	.	.	255255	95	46.8452	48.2734	54.7614	52.3615	1.62396e-05	3.55225e-05	0.0482096	0.0478355	2	95295000	96280000	5000
chr10	110420000	110425000	chr10	110455000	110460000	.	.	.	.	255255	597	258.222	333.457	300.652	335.54	2.59407e-40	4.04085e-17	3.57938e-40	4.42509e-17	4	110421250	110457500	8004
chr10	37975000	37980000	chr10	38095000	38100000	.	.	.	.	255255	221	102.609	96.7514	97.5805	128.431	8.4059e-12	5.23769e-22	1.29816e-11	0.000242642	4	37976250	38095000	6731
chr10	51060000	51065000	chr10	51960000	51965000	.	.	.	.	255255	124	48.9974	58.6729	65.8107	62.0117	8.37548e-09	1.00465e-08	0.000552634	0.000561679	2	51067500	51962500	5000
chr10	16840000	16845000	chr10	17255000	17260000	.	.	.	.	255255	614	62.8561	67.8467	81.9235	82.9206	0	0	0	0	26	16839038	17255576	17984
chr10	96020000	96030000	chr10	96320000	96330000	.	.	.	.	255255	782	384.51	390.356	499.452	434.857	8.00907e-27	8.64765e-27	2.74167e-06	1.18439e-26	1	96025000	96325000	0
chr10	93915000	93920000	chr10	94315000	94320000	.	.	.	.	255255	168	56.7858	55.7072	70.0048	64.0338	5.97476e-24	5.89333e-24	1.13469e-14	1.16565e-14	6	93917500	94316666	10035
chr10	78040000	78045000	chr10	79345000	79350000	.	.	.	.	255255	58	18.7785	20.7595	27.0368	20.61	2.81363e-08	5.4965e-05	0.0107813	5.59976e-05	1	78042500	79347500	0
chr10	123140000	123150000	chr10	129960000	129970000	.	.	.	.	255255	21	2.37839	2.91389	2.74202	2.66146	2.83961e-08	5.83269e-06	8.35201e-06	6.92138e-06	1	123145000	129965000	0
chr10	85995000	86000000	chr10	86375000	86380000	.	.	.	.	255255	171	67.5534	54.633	53.4519	74.5516	8.93909e-16	3.37815e-25	5.44773e-25	1.34458e-15	1	85997500	86377500	0
chr10	47440000	47450000	chr10	48180000	48190000	.	.	.	.	255255	97	18.2841	38.9241	43.677	43.9503	1.33626e-30	1.09258e-05	1.14297e-05	1.11445e-05	3	47445000	48185000	10000
chr10	62045000	62050000	chr10	62080000	62085000	.	.	.	.	255255	527	239.7	264.655	281.716	241.327	0	1.45051e-23	1.64835e-23	0	2	62045000	62082500	2500
chr10	43690000	43695000	chr10	44030000	44035000	.	.	.	.	255255	179	47.2582	56.227	61.5272	64.4372	2.6996e-40	1.28992e-28	3.22499e-18	3.31497e-18	8	43687500	44032500	15000
chr10	73845000	73850000	chr10	73880000	73885000	.	.	.	.	255255	1496	352.133	403.525	447.461	313.589	0	0	0	0	6	73842500	73881666	7683
chr10	4845000	4850000	chr10	5620000	5625000	.	.	.	.	255255	69	22.707	24.6443	28.8182	29.456	3.10355e-09	1.63765e-05	1.71695e-05	1.76291e-05	1	4847500	5622500	0
chr10	84370000	84375000	chr10	84535000	84540000	.	.	.	.	255255	382	102.72	95.885	95.7047	137.517	0	0	0	0	19	84371710	84535394	19427
chr10	101440000	101445000	chr10	101570000	101575000	.	.	.	.	255255	147	76.2968	62.3964	61.3013	76.819	5.52569e-09	6.60036e-09	8.32732e-16	8.27632e-09	1	101442500	101572500	0
chr10	100170000	100175000	chr10	100370000	100375000	.	.	.	.	255255	145	78.6917	71.057	77.3482	65.4551	0.00137711	2.05306e-08	0.00204247	2.54592e-08	1	100172500	100372500	0
chr10	117335000	117340000	chr10	117370000	117375000	.	.	.	.	255255	236	98.8097	115.752	117.785	113.026	1.85255e-15	2.07641e-15	2.87794e-15	2.89295e-15	2	117335000	117372500	2500
chr10	99845000	99850000	chr10	100430000	100435000	.	.	.	.	255255	86	37.8614	41.226	46.8879	37.8544	2.8116e-07	0.00118142	0.00121928	4.41456e-07	1	99847500	100432500	0
chr10	99970000	99975000	chr10	100045000	100050000	.	.	.	.	255255	604	239.492	255.063	303.518	356.374	0	4.152e-42	4.567e-42	2.99203e-18	3	99970833	100045833	3727
chr10	51385000	51390000	chr10	51960000	51965000	.	.	.	.	255255	188	54.588	56.1643	52.2716	71.328	1.22733e-32	1.18201e-32	1.96466e-32	2.47514e-21	4	51388750	51962500	5154
chr10	79770000	79780000	chr10	79920000	79930000	.	.	.	.	255255	62	16.8187	17.2951	16.6955	25.3868	3.18477e-10	1.2631e-09	1.43724e-09	0.00319426	1	79775000	79925000	0
chr10	100435000	100440000	chr10	100505000	100510000	.	.	.	.	255255	452	181.73	173.396	203.873	206.363	0	0	3.27224e-26	3.12189e-26	13	100437884	100513653	11160
chr10	29285000	29290000	chr10	30625000	30630000	.	.	.	.	255255	50	3.72333	3.13372	3.85341	3.84155	1.27818e-31	1.72766e-35	6.34218e-31	7.40698e-31	2	29290000	30627500	2500
chr10	93380000	93385000	chr10	93675000	93680000	.	.	.	.	255255	104	56.4803	50.8	56.1395	60.3305	0.000364349	0.000505359	0.000537809	0.000559582	4	93385000	93680000	3536
chr10	26680000	26685000	chr10	26880000	26885000	.	.	.	.	255255	421	178.981	131.71	100.486	219.119	3.17939e-38	0	0	3.7137e-19	2	26685000	26882500	2500
chr10	46105000	46110000	chr10	47380000	47385000	.	.	.	.	255255	236	4.81535	6.04788	6.75428	9.27266	0	0	0	0	2	46107500	47380000	2500
chr10	19820000	19825000	chr10	19925000	19930000	.	.	.	.	255255	103	49.7225	47.9113	60.8518	45.9304	0.000559848	6.93189e-08	0.000825771	8.7619e-08	1	19822500	19927500	0
chr10	60205000	60210000	chr10	60645000	60650000	.	.	.	.	255255	115	49.2961	49.8235	47.1527	74.5456	1.63807e-06	2.08893e-06	1.39088e-11	0.0132428	2	60205000	60647500	2500
chr10	107410000	107415000	chr10	108540000	108545000	.	.	.	.	255255	65	17.047	20.5224	20.8129	26.2191	1.72012e-11	1.88203e-07	2.0086e-07	0.000244545	3	107410833	108544166	3728
chr10	27370000	27375000	chr10	27655000	27660000	.	.	.	.	255255	154	49.8997	41.1744	47.7939	47.5225	1.72274e-18	1.22177e-27	1.70603e-27	1.74433e-27	7	27371785	27655357	7889
chr10	96640000	96645000	chr10	97025000	97030000	.	.	.	.	255255	236	79.2359	80.9241	92.8269	90.4795	3.53647e-27	3.39794e-27	5.59741e-27	5.69582e-27	5	96641500	97030500	10000
chr10	74735000	74740000	chr10	75020000	75025000	.	.	.	.	255255	442	176.795	152.828	166.223	184.895	0	0	0	0	12	74742500	75021250	12311
chr10	62490000	62495000	chr10	63085000	63090000	.	.	.	.	255255	131	38.867	44.3002	46.5418	49.4774	1.21539e-17	1.28886e-17	1.73063e-17	1.35798e-10	2	62492500	63085000	2500
chr10	24720000	24725000	chr10	24950000	24955000	.	.	.	.	255255	148	49.6318	59.8087	69.9117	67.6199	2.51697e-16	2.6573e-16	4.62571e-09	4.67383e-09	2	24722500	24950000	2500
chr10	17850000	17855000	chr10	18105000	18110000	.	.	.	.	255255	152	62.4006	62.8084	61.8259	74.9454	2.91768e-10	3.39692e-10	4.31899e-10	4.3822e-10	3	17854166	18105833	3728
chr10	115140000	115150000	chr10	115410000	115420000	.	.	.	.	255255	444	250.15	205.158	202.331	277.861	4.51264e-09	3.20161e-24	4.65138e-24	6.73312e-09	1	115145000	115415000	0
chr10	58780000	58790000	chr10	59810000	59820000	.	.	.	.	255255	182	92.5561	83.8036	104.072	84.187	2.36757e-10	3.95572e-10	0.000703229	4.91852e-10	2	58785000	59810000	5000
chr10	41760000	41765000	chr10	41810000	41815000	.	.	.	.	255255	347	62.0399	86.2442	103.8	143.349	0	0	0	4.19418e-34	4	41768750	41813750	8839
chr10	99615000	99620000	chr10	99710000	99715000	.	.	.	.	255255	549	299.929	262.88	271.981	289.868	1.70215e-28	2.2066e-28	2.50506e-28	2.51249e-28	14	99625357	99709642	14464
chr10	113800000	113805000	chr10	114100000	114105000	.	.	.	.	255255	692	176.877	181.333	222.635	214.977	0	0	0	0	20	113801750	114105250	13252
chr10	51070000	51075000	chr10	52215000	52220000	.	.	.	.	255255	126	52.0386	58.4049	59.5014	68.8855	2.35556e-09	2.80017e-09	3.49822e-09	0.000253445	2	51067500	52217500	5000
chr10	49590000	49595000	chr10	50275000	50280000	.	.	.	.	255255	118	60.5749	48.9038	65.4014	46.9862	3.06809e-07	3.83111e-07	0.00491609	1.36798e-12	2	49592500	50275000	2500
chr10	20855000	20860000	chr10	21490000	21495000	.	.	.	.	255255	72	32.8108	24.0411	32.287	24.8252	0.00125537	2.7196e-10	0.00194822	2.06705e-06	2	20860000	21495000	3536
chr10	49595000	49600000	chr10	50220000	50225000	.	.	.	.	255255	171	39.2138	43.2972	50.4127	46.5063	4.79447e-36	4.79085e-36	5.44773e-25	7.54162e-36	14	49595714	50219285	14365
chr10	106705000	106710000	chr10	108780000	108785000	.	.	.	.	255255	58	19.701	20.9411	22.221	21.6533	3.3902e-05	5.4965e-05	5.45553e-05	5.59976e-05	1	106707500	108782500	0
chr10	22695000	22700000	chr10	22985000	22990000	.	.	.	.	255255	293	150.585	123.222	102.848	180.725	1.54506e-18	1.74747e-18	8.06263e-33	1.39977e-07	1	22697500	22987500	0
chr10	97910000	97920000	chr10	98660000	98670000	.	.	.	.	255255	87	36.8334	37.4236	36.9607	36.3876	2.38234e-07	5.67123e-07	5.61476e-07	5.74331e-07	1	97915000	98665000	0
chr10	76630000	76635000	chr10	76980000	76985000	.	.	.	.	255255	81	30.2816	30.2282	31.1043	33.5975	8.7162e-10	1.22938e-09	1.20877e-05	1.24927e-05	2	76632500	76985000	2500
chr10	118565000	118570000	chr10	118850000	118855000	.	.	.	.	255255	293	113.785	109.204	137.578	116.128	5.23174e-33	4.89425e-33	2.36927e-18	8.2638e-33	8	118570625	118850625	8705
chr10	110590000	110600000	chr10	110880000	110890000	.	.	.	.	255255	601	286.152	324.543	363.433	367.781	2.9429e-41	9.32401e-18	1.22591e-17	1.23795e-17	10	110598000	110890000	22672
chr10	71725000	71730000	chr10	71770000	71775000	.	.	.	.	255255	546	240.719	266.601	337.84	297.551	0	1.05041e-27	1.14527e-09	1.20689e-27	8	71718750	71774375	33149
chr10	118570000	118575000	chr10	118795000	118800000	.	.	.	.	255255	233	95.474	103.529	123.132	109.822	4.14733e-26	1.22411e-14	4.7942e-06	1.68581e-14	8	118568750	118801875	9783
chr10	95290000	95295000	chr10	95755000	95760000	.	.	.	.	255255	65	20.4014	23.5647	29.4856	23.7959	1.19477e-07	1.88203e-07	0.000235634	2.00585e-07	1	95292500	95757500	0
chr10	113700000	113710000	chr10	114100000	114110000	.	.	.	.	255255	925	221.117	247.585	281.073	309.336	0	0	0	0	9	113698333	114105000	21082
chr10	71310000	71315000	chr10	71810000	71815000	.	.	.	.	255255	185	60.9528	52.134	65.4591	61.4293	2.83953e-31	2.74873e-31	2.80611e-20	2.86133e-20	7	71313214	71812500	10714
chr10	45460000	45465000	chr10	45670000	45675000	.	.	.	.	255255	360	97.9325	86.046	117.641	117.056	0	0	0	0	17	45466911	45665441	13672
chr10	84930000	84935000	chr10	86375000	86380000	.	.	.	.	255255	52	20.2406	16.1971	17.7728	21.1562	0.00178	1.34119e-05	1.28023e-05	0.00288741	4	84928750	86377500	5154
chr10	37840000	37850000	chr10	38360000	38370000	.	.	.	.	255255	106	51.8055	53.2617	56.6078	56.3948	0.000320455	0.000667489	0.000705549	0.000707722	3	37851666	38361666	7453
chr10	115355000	115360000	chr10	116285000	116290000	.	.	.	.	255255	70	20.639	25.6049	29.4722	27.8	1.19072e-09	8.05399e-06	8.51356e-06	8.74334e-06	1	115357500	116287500	0
chr10	123995000	124000000	chr10	124385000	124390000	.	.	.	.	255255	620	168.106	159.266	206.58	207.677	0	0	0	0	25	123995900	124391500	16357
chr10	21490000	21500000	chr10	23060000	23070000	.	.	.	.	255255	174	78.8146	90.6097	108.483	89.7278	1.67621e-08	2.86022e-08	0.00765087	3.48438e-08	1	21495000	23065000	0
chr10	110300000	110310000	chr10	112130000	112140000	.	.	.	.	255255	84	24.7875	37.4109	40.4621	42.8794	6.21867e-11	4.506e-06	0.00841249	0.00848668	1	110305000	112135000	0
chr10	22530000	22540000	chr10	27940000	27950000	.	.	.	.	255255	21	4.5316	4.51436	4.27725	4.7342	0.00125469	0.00486438	0.00609627	0.0052629	1	22535000	27945000	0
chr10	95790000	95795000	chr10	95830000	95835000	.	.	.	.	255255	1188	379.242	447.509	519.438	597.791	0	0	0	0	14	95783571	95836428	26769
chr10	21520000	21525000	chr10	22335000	22340000	.	.	.	.	255255	113	40.241	46.7064	52.8861	49.9633	4.52859e-11	5.23961e-11	7.11132e-06	7.44357e-06	7	21522500	22326785	18434
chr10	71725000	71730000	chr10	71810000	71815000	.	.	.	.	255255	366	129.552	148.018	175.891	181.278	9.273e-41	9.0947e-41	1.6599e-22	1.73573e-22	5	71712500	71813500	15033
chr10	117540000	117550000	chr10	129970000	129980000	.	.	.	.	255255	24	6.94529	6.26853	6.44705	7.1803	0.0156683	0.0458691	0.0470183	0.0449849	2	117545000	129970000	5000
chr10	30685000	30690000	chr10	30720000	30725000	.	.	.	.	255255	426	200.47	191.672	193.722	197.711	1.99135e-20	9.15671e-40	3.24447e-20	3.13759e-20	6	30680833	30720833	15723
chr10	60810000	60820000	chr10	61840000	61850000	.	.	.	.	255255	180	87.4535	88.5246	119.739	83.0528	7.09854e-10	1.19532e-09	0.00132153	1.4751e-09	2	60815000	61840000	5000
chr10	12120000	12130000	chr10	14950000	14960000	.	.	.	.	255255	51	20.1092	17.0513	18.5093	19.3093	0.00463297	5.41098e-05	5.46391e-05	4.99426e-05	1	12125000	14955000	0
chr10	22335000	22340000	chr10	22985000	22990000	.	.	.	.	255255	219	66.8829	83.8518	79.3176	115.398	1.0229e-33	2.38624e-21	3.71515e-21	3.74176e-11	6	22334166	22987500	16666
chr10	17605000	17610000	chr10	17870000	17875000	.	.	.	.	255255	171	43.3204	40.7994	65.7609	38.9389	4.79447e-36	4.79085e-36	1.30567e-15	7.54162e-36	3	17609166	17865833	13437
chr10	88835000	88840000	chr10	88930000	88935000	.	.	.	.	255255	994	194.098	177.051	246.654	206.295	0	0	0	0	23	88838369	88928152	17696
chr10	44390000	44395000	chr10	44855000	44860000	.	.	.	.	255255	139	54.354	52.7581	48.2761	69.6958	2.7983e-13	3.06674e-13	8.75834e-21	6.29934e-07	6	44391666	44855833	17180
chr10	119770000	119775000	chr10	119815000	119820000	.	.	.	.	255255	123	55.1706	67.5805	74.2943	65.7827	1.55933e-08	0.00076437	0.000812851	0.000826558	1	119772500	119817500	0
chr10	71835000	71840000	chr10	71895000	71900000	.	.	.	.	255255	744	361.574	345.852	398.25	413.285	0	0	3.85617e-20	4.46487e-20	1	71837500	71897500	0
chr10	69305000	69310000	chr10	69385000	69390000	.	.	.	.	255255	287	138.867	145.388	140.139	173.185	4.80588e-17	5.51285e-17	7.38194e-17	1.10125e-06	1	69307500	69387500	0
chr10	118565000	118570000	chr10	119195000	119200000	.	.	.	.	255255	56	16.4723	14.9564	20.245	13.0766	1.978e-07	1.48488e-10	0.000224934	1.54955e-10	2	118567500	119200000	2500
chr10	63210000	63215000	chr10	63630000	63635000	.	.	.	.	255255	388	153.002	178.343	196.996	238.233	0	1.93502e-28	1.02654e-12	9.93604e-13	6	63215000	63626666	13177
chr10	61895000	61900000	chr10	62420000	62425000	.	.	.	.	255255	158	65.4549	88.8383	95.7351	88.0713	6.79277e-12	1.46642e-05	1.68381e-05	1.71578e-05	2	61897500	62430000	7500
chr10	59905000	59910000	chr10	60030000	60035000	.	.	.	.	255255	383	195.204	190.416	188.781	229.068	4.43679e-12	4.5616e-27	5.96049e-27	7.38362e-12	3	59910833	60035833	12134
chr10	18400000	18410000	chr10	21520000	21530000	.	.	.	.	255255	61	26.983	27.08	28.9791	25.6617	0.00240969	0.00580384	0.00544515	0.00558092	1	18405000	21525000	0
chr10	51700000	51705000	chr10	52215000	52220000	.	.	.	.	255255	105	43.3716	44.6266	42.3225	55.6247	1.4713e-08	1.78564e-08	2.1251e-08	0.000359945	1	51702500	52217500	0
chr10	101275000	101280000	chr10	101570000	101575000	.	.	.	.	255255	250	115.425	104.984	95.9375	143.174	2.94954e-19	3.1327e-19	3.53067e-32	6.69176e-09	6	101287500	101572500	15000
chr10	11110000	11115000	chr10	11750000	11755000	.	.	.	.	255255	104	37.0002	34.7474	35.5653	44.1915	1.30823e-13	1.57423e-13	1.97907e-13	4.49195e-08	2	11117500	11752500	5000
chr10	101970000	101975000	chr10	102005000	102010000	.	.	.	.	255255	529	260.701	295.298	322.962	247.899	4.1563e-24	5.49977e-24	1.21846e-07	6.35406e-24	3	101965833	102000833	11785
chr10	21990000	21995000	chr10	23065000	23070000	.	.	.	.	255255	160	72.6338	56.8076	66.2946	62.5725	1.84136e-12	9.22421e-21	2.71626e-12	2.78759e-12	10	22004000	23066000	11597
chr10	132220000	132225000	chr10	132345000	132350000	.	.	.	.	255255	347	113.162	123.037	159.56	133.726	0	2.71617e-34	5.97914e-18	4.19418e-34	14	132224285	132352142	15690
chr10	91005000	91010000	chr10	91160000	91165000	.	.	.	.	255255	185	71.5824	77.603	103.645	81.9396	1.89264e-20	1.88785e-11	9.6087e-05	2.53184e-11	2	91007500	91157500	5000
chr10	99560000	99565000	chr10	99710000	99715000	.	.	.	.	255255	284	110.129	102.449	118.569	133.954	6.96763e-30	6.66188e-30	1.07936e-29	3.9983e-16	9	99558611	99710833	13989
chr10	42550000	42555000	chr10	42635000	42640000	.	.	.	.	255255	294	128.015	119.854	128.753	124.098	8.61652e-19	2.16374e-33	1.32047e-18	1.34033e-18	9	42553055	42637500	10687
chr10	61750000	61755000	chr10	62035000	62040000	.	.	.	.	255255	151	66.4661	64.1964	89.2289	67.8115	5.33419e-10	6.252e-10	0.000257944	7.99711e-10	3	61749166	62039166	6871
chr10	59830000	59835000	chr10	59905000	59910000	.	.	.	.	255255	643	292.288	281.026	295.584	400.398	0	0	0	5.01478e-07	3	59829166	59904166	7453
chr10	116445000	116450000	chr10	116780000	116785000	.	.	.	.	255255	47	23.7043	22.638	23.5403	24.5453	0.0236411	0.041094	0.0371535	0.0373465	2	116445000	116785000	3536
chr10	123105000	123110000	chr10	123955000	123960000	.	.	.	.	255255	85	35.4577	42.1368	41.3298	46.8192	5.63443e-07	0.00186802	0.00191147	0.00199017	1	123107500	123957500	0
chr10	104405000	104410000	chr10	104610000	104615000	.	.	.	.	255255	149	55.6816	54.183	67.5259	48.6231	1.12105e-16	1.17386e-16	2.59333e-09	3.59331e-25	7	104406071	104617500	11429
chr10	71385000	71390000	chr10	71895000	71900000	.	.	.	.	255255	125	42.8206	56.3193	57.7008	57.0794	2.54625e-15	5.32963e-09	6.60977e-09	7.00637e-09	2	71385000	71895000	3536
chr10	109880000	109885000	chr10	110135000	110140000	.	.	.	.	255255	300	122.093	92.0105	127.662	94.4409	2.39139e-20	0	3.64784e-20	0	10	109884000	110131500	9394
chr10	23990000	23995000	chr10	24355000	24360000	.	.	.	.	255255	210	86.625	78.145	109.163	85.9264	1.67184e-18	1.73803e-18	3.21833e-09	2.63618e-18	4	23995000	24362500	5590
chr10	46320000	46325000	chr10	47260000	47265000	.	.	.	.	255255	44	9.53922	14.2379	16.0404	10.9408	4.27184e-11	5.08011e-05	0.00478842	1.37755e-07	1	46322500	47262500	0
chr10	124100000	124110000	chr10	125060000	125070000	.	.	.	.	255255	120	51.4947	53.1119	50.7402	57.8635	2.28703e-07	4.42287e-07	4.87662e-07	4.97144e-07	1	124105000	125065000	0
chr10	37980000	37985000	chr10	38365000	38370000	.	.	.	.	255255	60	19.9158	20.1808	22.0471	23.4962	7.45881e-06	1.19274e-05	1.21027e-05	1.23525e-05	3	37980833	38364166	10671
chr10	123400000	123405000	chr10	124285000	124290000	.	.	.	.	255255	48	21.338	20.7744	22.8965	20.551	0.0149303	0.0261104	0.0234997	0.0237303	2	123397500	124290000	5590
chr10	7120000	7125000	chr10	7685000	7690000	.	.	.	.	255255	174	67.0558	72.8108	76.5262	86.2357	9.8227e-17	1.02602e-16	1.43933e-16	1.01725e-08	2	7122500	7685000	2500
chr10	107405000	107410000	chr10	107810000	107815000	.	.	.	.	255255	247	60.9022	72.3325	87.6865	82.4562	0	0	4.91786e-31	5.00621e-31	8	107408125	107813125	10643
chr10	7425000	7430000	chr10	7605000	7610000	.	.	.	.	255255	143	65.6026	77.3004	91.8111	78.6002	5.10997e-08	0.00359704	0.00385377	0.00391339	3	7432500	7609166	10138
chr10	102225000	102230000	chr10	102595000	102600000	.	.	.	.	255255	250	114.246	123.168	148.641	136.552	2.94954e-19	5.33383e-09	6.58381e-09	6.69176e-09	8	102228750	102584375	13184
chr10	127715000	127720000	chr10	128150000	128155000	.	.	.	.	255255	69	15.1685	18.6889	22.2167	19.1473	2.26724e-18	3.25682e-13	5.67202e-09	3.69729e-13	3	127714166	128145833	10671
chr10	77640000	77645000	chr10	77710000	77715000	.	.	.	.	255255	674	315.402	270.991	275.55	331.146	5.79617e-32	0	0	8.06151e-32	11	77653409	77707500	20021
chr10	5810000	5820000	chr10	6050000	6060000	.	.	.	.	255255	548	266.347	286.476	306.624	341.466	4.17176e-28	4.29715e-28	8.46476e-10	8.63224e-10	1	5815000	6055000	0
chr10	118570000	118575000	chr10	119020000	119025000	.	.	.	.	255255	110	55.7699	46.1796	60.7274	51.1058	2.22982e-05	5.01115e-10	3.29865e-05	3.4501e-05	1	118572500	119022500	0
chr10	113875000	113880000	chr10	114025000	114030000	.	.	.	.	255255	178	84.7383	101.606	96.0249	112.626	8.07695e-10	0.000848867	1.22432e-09	0.000969037	1	113877500	114027500	0
chr10	131240000	131245000	chr10	131875000	131880000	.	.	.	.	255255	47	17.4472	13.3298	13.1153	13.2282	0.000403267	2.91236e-06	2.92272e-06	2.78043e-06	2	131242500	131875000	2500
chr10	11510000	11515000	chr10	11755000	11760000	.	.	.	.	255255	654	216.279	159.039	264.075	166.528	0	0	0	0	3	11514166	11759166	3727
chr10	128120000	128130000	chr10	132330000	132340000	.	.	.	.	255255	53	22.9235	20.5573	22.7618	22.2225	0.0013947	0.00340417	0.00314404	0.00309655	1	128125000	132335000	0
chr10	38090000	38100000	chr10	42540000	42550000	.	.	.	.	255255	101	27.9972	30.4722	26.7604	37.0912	1.37076e-18	5.61174e-18	7.02268e-18	7.84432e-12	1	38095000	42545000	0
chr10	122295000	122300000	chr10	122565000	122570000	.	.	.	.	255255	216	68.0545	66.9545	65.6585	88.106	1.89735e-32	1.7964e-32	2.95448e-32	3.48979e-20	6	122291666	122568333	14190
chr10	11420000	11425000	chr10	11755000	11760000	.	.	.	.	255255	218	99.9319	91.7308	89.9291	118.975	4.00731e-11	5.05227e-21	7.80901e-21	6.25925e-11	7	11429642	11753928	11780
chr10	28250000	28255000	chr10	28380000	28385000	.	.	.	.	255255	467	103.747	97.3203	102.855	130.3	0	0	0	0	22	28252045	28384772	13515
chr10	72360000	72365000	chr10	72625000	72630000	.	.	.	.	255255	140	70.0304	57.5467	83.6713	53.4172	2.5084e-07	1.43884e-13	0.0094614	2.11121e-13	2	72365000	72627500	2500
chr10	21990000	21995000	chr10	22420000	22425000	.	.	.	.	255255	168	61.9104	61.1439	79.2915	66.7827	7.72876e-15	5.89333e-24	1.95433e-07	1.16565e-14	14	22000000	22427500	13463
chr10	16810000	16820000	chr10	18650000	18660000	.	.	.	.	255255	84	37.2757	36.287	46.357	36.7327	1.95366e-06	4.506e-06	0.00841249	4.60346e-06	1	16815000	18655000	0
chr10	96640000	96645000	chr10	96825000	96830000	.	.	.	.	255255	451	119.74	145.179	178.203	170.809	0	0	0	0	15	96640833	96827833	13274
chr10	12255000	12260000	chr10	12710000	12715000	.	.	.	.	255255	437	161.423	164.34	207.744	202.82	0	0	1.14781e-22	1.1058e-22	16	12257812	12711875	16313
chr10	23990000	23995000	chr10	24195000	24200000	.	.	.	.	255255	314	153.44	126.207	140.329	140.813	2.35999e-11	3.75648e-24	5.31753e-24	5.42517e-24	12	23995416	24193333	12113
chr10	91480000	91485000	chr10	91915000	91920000	.	.	.	.	255255	102	51.3143	41.7653	40.4338	45.0984	0.000851719	1.3413e-07	1.57929e-07	1.68836e-07	7	91490357	91916785	9716
chr10	14500000	14505000	chr10	14820000	14825000	.	.	.	.	255255	364	136.032	128.059	139.425	189.408	4.69585e-40	4.59388e-40	7.23747e-40	5.49381e-22	8	14498750	14825000	8385
chr10	38835000	38840000	chr10	38900000	38905000	.	.	.	.	255255	313	98.2889	83.3405	84.4337	68.8147	2.2092e-40	0	0	0	2	38837500	38895000	7500
chr10	7470000	7480000	chr10	11240000	11250000	.	.	.	.	255255	70	37.1857	33.8311	37.1607	37.7158	0.00581949	0.0129191	0.0128732	0.012784	2	7480000	11245000	5000
chr10	71310000	71315000	chr10	71570000	71575000	.	.	.	.	255255	467	119.526	134.469	191.602	137.866	0	0	0	0	17	71313970	71569264	16785
chr10	110135000	110140000	chr10	110220000	110225000	.	.	.	.	255255	482	218.367	209.959	258.869	193.847	3.90567e-34	4.59832e-34	6.70503e-15	5.77707e-34	2	110140000	110222500	2500
chr10	5445000	5450000	chr10	5710000	5715000	.	.	.	.	255255	180	71.7399	77.8857	115.705	69.0842	1.00291e-18	3.21593e-10	0.000506329	1.52151e-18	1	5447500	5712500	0
chr10	49410000	49415000	chr10	49510000	49515000	.	.	.	.	255255	375	152.679	139.585	147.096	152.926	0	0	0	0	18	49409722	49512222	21200
chr10	39290000	39295000	chr10	39470000	39475000	.	.	.	.	255255	105	35.4956	40.0376	30.7183	55.4416	5.26728e-14	1.78564e-08	3.37107e-20	0.000359945	5	39299500	39470500	18111
chr10	70225000	70230000	chr10	70355000	70360000	.	.	.	.	255255	686	247.348	280.543	350.962	337.852	0	0	1.81593e-34	1.76023e-34	24	70223750	70362083	17007
chr10	21990000	21995000	chr10	22985000	22990000	.	.	.	.	255255	267	71.1931	74.5364	89.6452	91.6569	0	0	5.98667e-39	5.9701e-39	21	22003452	22991309	21436
chr10	60115000	60120000	chr10	60205000	60210000	.	.	.	.	255255	348	143.549	149.393	161.311	167.819	1.26757e-34	1.27174e-34	3.52933e-18	3.6834e-18	16	60108750	60207812	13524
chr10	24195000	24200000	chr10	24505000	24510000	.	.	.	.	255255	265	123.882	122.912	127.066	136.797	4.71799e-12	5.79325e-12	7.389e-12	7.49322e-12	10	24203500	24509500	22804
chr10	51375000	51380000	chr10	52215000	52220000	.	.	.	.	255255	124	69.9257	57.0185	55.8233	70.9333	0.000380206	1.00465e-08	1.23947e-08	0.000561679	6	51390833	52210833	14907
chr10	50415000	50420000	chr10	50615000	50620000	.	.	.	.	255255	244	98.2825	123.802	139.004	152.92	1.38866e-17	6.35398e-08	7.69111e-08	7.86272e-08	7	50421785	50620357	12163
chr10	62730000	62735000	chr10	62810000	62815000	.	.	.	.	255255	390	172.197	170.52	188.575	216.459	4.74615e-29	5.38144e-29	7.08707e-29	4.39204e-13	2	62730000	62812500	2500
chr10	97070000	97075000	chr10	97205000	97210000	.	.	.	.	255255	744	246.712	255.532	321.287	286.045	0	0	0	0	24	97076250	97208750	16298
chr10	27500000	27510000	chr10	28520000	28530000	.	.	.	.	255255	131	67.0424	64.6163	64.1219	72.6866	4.48683e-05	8.84392e-05	9.93385e-05	9.82475e-05	2	27515000	28525000	10000
chr10	25875000	25880000	chr10	26265000	26270000	.	.	.	.	255255	183	68.0094	70.3701	86.7405	65.5821	9.44061e-20	9.53131e-20	7.76403e-11	1.42877e-19	5	25876500	26270500	11180
chr10	87655000	87660000	chr10	87765000	87770000	.	.	.	.	255255	225	102.129	95.743	137.018	87.9858	9.82582e-13	2.3868e-23	6.96011e-05	3.83236e-23	4	87655000	87773750	8385
chr10	63455000	63460000	chr10	63715000	63720000	.	.	.	.	255255	288	124.217	123.795	119.575	182.656	2.73395e-17	3.12645e-17	4.54063e-31	7.86923e-07	1	63457500	63717500	0
chr10	103410000	103415000	chr10	103590000	103595000	.	.	.	.	255255	115	62.3798	53.3417	63.1295	61.5617	0.00908999	2.08893e-06	0.0130437	0.0132428	2	103415000	103592500	2500
chr10	52640000	52645000	chr10	52725000	52730000	.	.	.	.	255255	221	70.0209	68.0123	76.9693	66.4815	1.42044e-34	1.33315e-34	2.25274e-34	2.36414e-34	12	52643750	52727916	19084
chr10	113955000	113960000	chr10	114025000	114030000	.	.	.	.	255255	347	151.506	173.19	176.976	196.937	2.70331e-34	4.70827e-18	5.97914e-18	1.86101e-06	1	113957500	114027500	0
chr10	11110000	11115000	chr10	11480000	11485000	.	.	.	.	255255	124	67.9564	57.7764	65.8865	63.9134	0.000380206	1.00465e-08	0.000552634	0.000561679	3	11110833	11480833	8975
chr10	38920000	38930000	chr10	39190000	39200000	.	.	.	.	255255	118	49.6573	47.5664	61.5039	64.8765	7.28172e-07	4.0342e-12	0.0146037	0.0141942	3	38925000	39211666	16666
chr10	123580000	123585000	chr10	123965000	123970000	.	.	.	.	255255	835	96.8307	71.1333	102.76	87.5263	0	0	0	0	26	123584423	123964230	17567
chr10	71375000	71380000	chr10	71695000	71700000	.	.	.	.	255255	283	117.07	127.417	142.611	143.958	1.52552e-29	5.14105e-16	6.83909e-16	6.94659e-16	14	71383928	71705357	13740
chr10	26335000	26340000	chr10	26560000	26565000	.	.	.	.	255255	654	288.622	244.57	312.658	272.459	0	0	1.34105e-27	0	17	26337794	26557205	15440
chr10	63275000	63280000	chr10	63715000	63720000	.	.	.	.	255255	265	111.495	112.225	107.368	140.402	1.03414e-23	1.05514e-23	1.62648e-23	7.49322e-12	4	63273750	63717500	11250
chr10	61140000	61150000	chr10	61810000	61820000	.	.	.	.	255255	197	82.8087	96.7482	121.833	94.6595	3.00283e-14	4.69718e-14	2.95789e-06	6.05966e-14	2	61145000	61825000	10000
chr10	34520000	34525000	chr10	34635000	34640000	.	.	.	.	255255	432	124.658	110.784	126.492	135.679	0	0	0	0	19	34525657	34635394	17507
chr10	13370000	13375000	chr10	13435000	13440000	.	.	.	.	255255	406	124.821	120.341	140.547	127.35	0	0	0	0	13	13374423	13440961	22538
chr10	127715000	127720000	chr10	128070000	128075000	.	.	.	.	255255	118	28.4342	29.0313	41.5156	34.4677	2.46556e-27	3.67733e-27	1.28316e-12	2.38123e-19	5	127717500	128072500	5000
chr10	27735000	27740000	chr10	28390000	28395000	.	.	.	.	255255	106	56.9004	52.0034	54.4397	59.7363	0.000149485	0.00020399	0.000221188	0.000229462	4	27741250	28388750	7289
chr10	114550000	114555000	chr10	115125000	115130000	.	.	.	.	255255	126	34.8535	34.1158	35.4538	42.8239	2.79545e-23	3.14088e-23	4.17105e-23	1.60054e-15	11	114550681	115124318	11957
chr10	74180000	74185000	chr10	74230000	74235000	.	.	.	.	255255	272	119.205	127.904	143.717	158.402	6.43345e-26	1.78132e-13	2.30293e-13	0.000110378	2	74182500	74225000	7500
chr10	61740000	61745000	chr10	62420000	62425000	.	.	.	.	255255	106	58.3774	52.0952	51.1966	48.9535	0.000149485	0.00020399	0.000221188	0.000229462	1	61742500	62422500	0
chr10	80535000	80540000	chr10	80690000	80695000	.	.	.	.	255255	145	64.5687	57.0334	69.6266	58.4261	1.70152e-08	2.96312e-15	2.52666e-08	4.41653e-15	2	80537500	80695000	2500
chr10	104765000	104770000	chr10	104925000	104930000	.	.	.	.	255255	125	65.551	62.401	66.6837	71.3377	0.000255769	0.000345236	0.000372747	0.000378976	1	104767500	104927500	0
chr10	45760000	45770000	chr10	50100000	50110000	.	.	.	.	255255	23	0.629626	1.7896	2.03178	1.84509	8.30431e-16	2.42117e-11	3.11429e-09	3.15082e-11	2	45760000	50105000	5000
chr10	110740000	110750000	chr10	110890000	110900000	.	.	.	.	255255	1463	622.726	520.594	593.822	669.942	0	0	0	0	7	110745000	110895000	20000
chr10	29385000	29390000	chr10	29450000	29455000	.	.	.	.	255255	281	100.383	101.421	111.054	112.794	7.21317e-29	6.95886e-29	1.11109e-28	1.13527e-28	11	29383863	29449772	22315
chr10	103500000	103510000	chr10	103550000	103560000	.	.	.	.	255255	799	377.371	430.45	444.141	431.033	0	5.6917e-30	7.80522e-30	7.93356e-30	1	103505000	103555000	0
chr10	59240000	59245000	chr10	59580000	59585000	.	.	.	.	255255	122	57.166	60.2253	75.5047	62.1758	2.88232e-08	3.49194e-08	0.00118506	0.00120513	2	59245000	59577500	5590
chr10	101210000	101215000	chr10	101570000	101575000	.	.	.	.	255255	434	103.495	93.3682	115.998	120.47	0	0	0	0	9	101214722	101569722	12970
chr10	48550000	48560000	chr10	48600000	48610000	.	.	.	.	255255	1148	568.498	604.838	588.502	650.913	0	5.09013e-27	0	6.18744e-27	2	48550000	48605000	5000
chr10	72360000	72365000	chr10	73060000	73065000	.	.	.	.	255255	142	52.066	40.1443	53.0434	43.6273	2.86397e-14	3.28783e-22	4.24971e-14	4.58856e-22	7	72362500	73061071	6429
chr10	33195000	33200000	chr10	34635000	34640000	.	.	.	.	255255	53	21.8234	19.1528	21.6286	22.3521	0.000977249	5.60107e-06	0.00157595	0.00158652	4	33196250	34636250	6374
chr10	16310000	16315000	chr10	16545000	16550000	.	.	.	.	255255	146	79.6391	70.0973	79.8924	77.0956	0.000991023	1.16528e-08	0.00147183	1.45186e-08	1	16312500	16547500	0
chr10	12215000	12220000	chr10	13070000	13075000	.	.	.	.	255255	150	60.1414	68.8019	65.7413	76.6911	4.93354e-17	1.13633e-09	1.43592e-09	1.44534e-09	6	12230000	13076666	30664
chr10	94275000	94280000	chr10	94440000	94445000	.	.	.	.	255255	311	78.5731	74.7735	85.7872	94.7479	0	0	0	0	15	94279833	94444833	14807
chr10	52885000	52890000	chr10	55260000	55265000	.	.	.	.	255255	53	15.466	16.5345	18.3233	18.9599	2.12301e-09	5.60107e-06	5.39806e-06	5.73071e-06	2	52885000	55265000	3536
chr10	89795000	89800000	chr10	90130000	90135000	.	.	.	.	255255	232	99.5171	96.0492	128.134	103.245	1.93588e-14	9.04511e-26	6.80059e-06	3.01049e-14	12	89796250	90139583	12652
chr10	74415000	74420000	chr10	74735000	74740000	.	.	.	.	255255	185	92.4619	90.6414	75.9856	103.752	1.63919e-11	1.88785e-11	2.80611e-20	9.87881e-05	1	74417500	74737500	0
chr10	84660000	84670000	chr10	86370000	86380000	.	.	.	.	255255	99	53.8787	41.8156	38.269	58.5238	0.00552723	3.3251e-06	4.86709e-11	0.0121662	1	84665000	86375000	0
chr10	59240000	59245000	chr10	59620000	59625000	.	.	.	.	255255	202	80.4351	60.0923	74.2074	61.9729	4.08255e-16	2.60866e-39	1.379e-26	1.43729e-26	6	59240833	59618333	6719
chr10	92515000	92520000	chr10	92570000	92575000	.	.	.	.	255255	697	177.661	183.315	201.55	252.55	0	0	0	0	20	92520500	92576000	17357
chr10	73890000	73895000	chr10	73935000	73940000	.	.	.	.	255255	745	255.167	276.163	321.987	360.927	0	0	0	0	22	73891363	73940681	18587
chr10	123130000	123135000	chr10	123965000	123970000	.	.	.	.	255255	91	27.5719	36.6632	36.482	43.6283	7.21408e-14	9.12861e-09	1.09056e-08	0.00011037	5	123128500	123970500	17029
chr10	15900000	15905000	chr10	16540000	16545000	.	.	.	.	255255	101	31.0705	35.9131	45.7751	39.8543	1.88656e-12	2.34944e-12	3.00006e-07	3.23394e-07	7	15901071	16537500	15068
chr10	117495000	117500000	chr10	118455000	118460000	.	.	.	.	255255	93	40.9843	36.0849	46.6009	37.1406	2.39854e-05	1.91329e-09	3.52623e-05	2.35939e-09	1	117497500	118457500	0
chr10	12255000	12260000	chr10	12905000	12910000	.	.	.	.	255255	145	60.1572	69.2526	75.0621	84.7571	2.75777e-15	2.05306e-08	2.52666e-08	0.00207428	4	12257500	12902500	5000
chr10	45000000	45010000	chr10	46020000	46030000	.	.	.	.	255255	160	54.6818	77.4592	89.3828	82.6143	2.28711e-20	2.01574e-05	2.31496e-05	2.31473e-05	1	45005000	46025000	0
chr10	60340000	60345000	chr10	60430000	60435000	.	.	.	.	255255	226	102.124	98.8936	95.5674	111.39	5.68864e-13	6.61805e-13	1.73225e-23	8.87874e-13	6	60345000	60432500	12500
chr10	86930000	86940000	chr10	87420000	87430000	.	.	.	.	255255	71	30.7372	23.7605	29.4359	33.5	3.74451e-06	1.39519e-09	9.41981e-06	0.00803506	1	86935000	87425000	0
chr10	57340000	57345000	chr10	58060000	58065000	.	.	.	.	255255	93	31.6844	31.7789	40.51	37.0649	1.50174e-09	1.91329e-09	3.52623e-05	2.35939e-09	6	57340833	58063333	8375
chr10	9610000	9615000	chr10	10670000	10675000	.	.	.	.	255255	38	14.5287	14.1936	13.6666	15.4499	0.00320159	0.00630329	0.00517453	0.0051695	1	9612500	10672500	0
chr10	89295000	89300000	chr10	89330000	89335000	.	.	.	.	255255	576	257.048	312.835	226.656	334.566	6.3024e-35	7.81307e-14	0	8.57967e-14	2	89300000	89335000	3536
chr10	7585000	7590000	chr10	7635000	7640000	.	.	.	.	255255	158	71.5341	83.8432	85.0008	88.7484	6.79277e-12	1.46642e-05	1.68381e-05	1.71578e-05	1	7587500	7637500	0
chr10	79935000	79940000	chr10	80040000	80045000	.	.	.	.	255255	98	50.0964	48.9993	53.5898	51.8053	0.00408303	0.00588923	0.00600708	0.00618383	2	79932500	80040000	5590
chr10	98465000	98470000	chr10	99245000	99250000	.	.	.	.	255255	189	35.4405	38.0816	46.5417	40.7772	0	0	0	0	9	98468611	99244722	12272
chr10	87200000	87210000	chr10	87500000	87510000	.	.	.	.	255255	98	23.9423	36.7107	29.0927	55.2843	6.62746e-24	1.00859e-10	1.96298e-16	0.0174889	1	87205000	87505000	0
chr10	22330000	22340000	chr10	23360000	23370000	.	.	.	.	255255	104	39.3181	51.2674	47.6238	60.1945	5.88963e-08	0.00160971	1.33891e-07	0.00169674	1	22335000	23365000	0
chr10	28665000	28670000	chr10	29130000	29135000	.	.	.	.	255255	150	61.4184	62.728	65.4898	78.368	9.66098e-10	1.13633e-09	1.43592e-09	0.000376802	6	28665000	29129166	7683
chr10	5710000	5715000	chr10	6040000	6045000	.	.	.	.	255255	164	70.7156	80.4941	71.3539	79.8763	1.25081e-13	1.05861e-06	1.83444e-13	1.27933e-06	1	5712500	6042500	0
chr10	125870000	125875000	chr10	126500000	126505000	.	.	.	.	255255	65	26.39	26.2382	31.8052	29.7578	0.000151322	0.000232925	0.0394042	0.000244545	2	125870000	126502500	2500
chr10	71950000	71955000	chr10	72340000	72345000	.	.	.	.	255255	203	75.0822	65.2378	58.2211	103.797	3.66734e-27	3.53926e-27	1.4905e-39	8.09564e-08	2	71955000	72340000	3536
chr10	84265000	84270000	chr10	84535000	84540000	.	.	.	.	255255	475	97.4869	98.6995	119.56	138.164	0	0	0	0	24	84265208	84536250	18779
chr10	51005000	51010000	chr10	51420000	51425000	.	.	.	.	255255	127	53.0811	50.7715	59.2494	62.6008	1.23444e-09	1.45681e-09	1.83398e-09	0.000167905	3	51005833	51422500	8333
chr10	48655000	48660000	chr10	48950000	48955000	.	.	.	.	255255	123	38.8674	44.1574	68.5403	43.739	1.42139e-14	1.55115e-14	0.000812851	2.14908e-14	2	48657500	48947500	5000
chr10	64040000	64045000	chr10	64290000	64295000	.	.	.	.	255255	152	66.5664	70.9136	78.4552	77.2849	2.91768e-10	3.39692e-10	0.000178147	0.000181069	4	64040000	64292500	5590
chr10	62600000	62605000	chr10	62940000	62945000	.	.	.	.	255255	146	67.1264	76.2134	94.8448	67.7882	9.71216e-09	1.16528e-08	0.00147183	1.45186e-08	2	62605000	62942500	2500
chr10	132575000	132580000	chr10	132635000	132640000	.	.	.	.	255255	219	109.747	105.401	108.367	124.652	2.39072e-11	2.86002e-11	3.68595e-11	0.000436139	2	132577500	132635000	2500
chr10	74265000	74270000	chr10	75235000	75240000	.	.	.	.	255255	116	43.6132	41.9579	45.1209	60.1596	4.45156e-12	5.03711e-12	6.3586e-12	1.47389e-06	6	74254166	75235833	13438
chr10	125720000	125730000	chr10	128110000	128120000	.	.	.	.	255255	145	75.1089	60.3745	64.6045	71.7454	4.24753e-08	1.3513e-14	9.29135e-08	9.19256e-08	2	125735000	128115000	10000
chr10	30150000	30160000	chr10	31450000	31460000	.	.	.	.	255255	56	23.5862	24.2734	23.4091	24.0555	0.00018388	0.000475993	0.000426613	0.000426762	1	30155000	31455000	0
chr10	131885000	131890000	chr10	132145000	132150000	.	.	.	.	255255	132	40.3618	44.7486	59.4042	48.4271	4.8856e-18	5.13341e-18	6.39432e-11	7.09903e-18	4	131885000	132138750	9763
chr10	133325000	133330000	chr10	133495000	133500000	.	.	.	.	255255	201	47.9791	54.8863	80.6754	56.1385	0	8.11429e-39	1.22899e-15	1.56801e-38	8	133329375	133508750	11676
chr10	91385000	91390000	chr10	91690000	91695000	.	.	.	.	255255	181	79.4759	92.254	102.132	81.8076	1.577e-10	1.84635e-10	0.000367658	2.42354e-10	4	91391250	91695000	8385
chr10	78045000	78050000	chr10	78650000	78655000	.	.	.	.	255255	178	86.4648	67.9456	74.9741	70.9665	8.07695e-10	4.90728e-18	6.98817e-18	7.18855e-18	5	78052500	78655500	17000
chr10	86930000	86940000	chr10	87500000	87510000	.	.	.	.	255255	150	47.8367	56.1713	68.8192	83.6994	1.13727e-25	2.3454e-16	5.41724e-09	0.00107958	1	86935000	87505000	0
chr10	91295000	91300000	chr10	91690000	91695000	.	.	.	.	255255	141	78.5444	67.7465	76.8353	66.7944	0.00480718	1.83642e-07	2.20566e-07	2.22781e-07	2	91300000	91692500	2500
chr10	104120000	104125000	chr10	104335000	104340000	.	.	.	.	255255	106	46.8946	50.07	52.5949	54.1966	7.39853e-09	0.00020399	0.000221188	0.000229462	1	104122500	104337500	0
chr10	48975000	48980000	chr10	49510000	49515000	.	.	.	.	255255	173	72.5053	66.5819	75.525	80.1329	2.05964e-16	2.1581e-16	3.01518e-16	1.69437e-08	9	48980277	49515277	14958
chr10	42860000	42865000	chr10	43460000	43465000	.	.	.	.	255255	63	10.1221	20.0147	15.2508	26.8012	1.89878e-19	1.04303e-06	2.86914e-14	0.000800477	1	42862500	43462500	0
chr10	4845000	4850000	chr10	4980000	4985000	.	.	.	.	255255	141	47.8095	45.2288	50.0654	49.772	8.57153e-22	8.98285e-22	9.16118e-14	9.91584e-14	4	4851250	4983750	6374
chr10	54980000	54985000	chr10	55265000	55270000	.	.	.	.	255255	86	42.4268	41.5586	44.8397	46.0596	0.000809291	0.00118142	0.00121928	0.00127238	3	54984166	55264166	3727
chr10	39060000	39065000	chr10	39235000	39240000	.	.	.	.	255255	169	70.9752	88.5885	94.3082	86.4699	3.79439e-15	9.9526e-08	1.20732e-07	1.23289e-07	1	39062500	39237500	0
chr10	117130000	117140000	chr10	129960000	129970000	.	.	.	.	255255	24	3.53056	3.08489	3.03861	4.46632	3.29619e-07	2.00942e-08	3.00906e-08	8.79481e-05	1	117135000	129965000	0
chr10	48660000	48665000	chr10	48695000	48700000	.	.	.	.	255255	717	302.122	302.532	312.444	361.447	0	0	8.975e-42	8.544e-42	8	48660625	48705000	12885
chr10	20860000	20865000	chr10	21270000	21275000	.	.	.	.	255255	152	57.1701	49.7704	60.3947	57.2085	9.35326e-18	9.62819e-18	1.40131e-17	1.49023e-17	8	20859375	21268750	9291
chr10	35630000	35640000	chr10	37750000	37760000	.	.	.	.	255255	113	42.8163	40.5072	45.8266	44.3276	8.81101e-11	2.03503e-10	2.1412e-10	2.20332e-10	3	35631666	37751666	7453
chr10	71310000	71315000	chr10	71615000	71620000	.	.	.	.	255255	239	104.809	101.624	145.414	99.4173	3.05816e-16	3.37984e-16	5.37113e-07	4.76133e-16	3	71309166	71614166	6871
chr10	88560000	88565000	chr10	89215000	89220000	.	.	.	.	255255	101	48.7285	37.281	42.9223	41.7969	2.06679e-07	2.34944e-12	3.00006e-07	3.23394e-07	6	88568333	89212500	15023
chr10	119700000	119710000	chr10	123390000	123400000	.	.	.	.	255255	44	10.8112	11.4996	13.0607	11.2768	4.18636e-08	1.73574e-07	7.62736e-05	1.70362e-07	2	119705000	123400000	5000
chr10	124535000	124540000	chr10	124825000	124830000	.	.	.	.	255255	358	127.655	136.022	182.69	137.101	5.58391e-38	5.54293e-38	1.55701e-20	8.83657e-38	12	124533750	124828750	12374
chr10	21490000	21495000	chr10	21945000	21950000	.	.	.	.	255255	229	103.219	104.145	128.245	118.897	1.07172e-13	1.22725e-13	1.88834e-05	1.66951e-13	8	21494375	21952500	19132
chr10	18650000	18660000	chr10	22330000	22340000	.	.	.	.	255255	87	25.0567	28.2411	35.9805	31.7429	3.57204e-12	1.20408e-11	5.61476e-07	5.74331e-07	2	18655000	22330000	5000
chr10	14605000	14610000	chr10	14740000	14745000	.	.	.	.	255255	359	167.891	192.092	203.648	220.107	5.75227e-21	6.94079e-21	4.47251e-08	4.38607e-08	5	14605500	14744500	8246
chr10	27310000	27315000	chr10	37145000	37150000	.	.	.	.	255255	20	0.272924	0.389464	0.225852	2.4952	1.42738e-11	5.58248e-11	3.18841e-11	1.13273e-06	1	27312500	37147500	0
chr10	101780000	101785000	chr10	102070000	102075000	.	.	.	.	255255	243	135.865	108.077	105.126	144.873	7.19023e-08	2.81907e-17	4.05153e-17	1.17155e-07	1	101782500	102072500	0
chr10	104580000	104585000	chr10	105690000	105695000	.	.	.	.	255255	42	10.435	11.618	12.7043	12.2979	5.09649e-07	1.37406e-06	0.000259222	1.31268e-06	1	104582500	105692500	0
chr10	114300000	114305000	chr10	114545000	114550000	.	.	.	.	255255	193	65.9207	72.0744	98.3337	76.3939	2.41735e-23	2.38924e-23	5.04589e-06	3.78672e-23	6	114301666	114548333	9205
chr10	114470000	114475000	chr10	114695000	114700000	.	.	.	.	255255	376	100.527	119.674	150.258	141.095	0	0	0	0	15	114470500	114698166	11667
chr10	62035000	62040000	chr10	62420000	62425000	.	.	.	.	255255	143	58.1164	64.8716	85.9363	65.4423	1.32039e-14	6.22506e-08	0.00385377	7.62801e-08	2	62035000	62427500	5590
chr10	30410000	30415000	chr10	30530000	30535000	.	.	.	.	255255	856	260.003	244.695	271.616	326.829	0	0	0	0	41	30412012	30541158	58181
chr10	110355000	110360000	chr10	110410000	110415000	.	.	.	.	255255	1025	363.261	376.629	541.201	424.187	0	0	8.4937e-41	0	19	110348815	110415131	41399
chr10	120945000	120950000	chr10	121895000	121900000	.	.	.	.	255255	177	50.2253	51.2317	70.9706	59.1553	9.80121e-28	9.58294e-28	1.49647e-17	1.63108e-27	17	120946617	121894852	16102
chr10	31030000	31035000	chr10	31315000	31320000	.	.	.	.	255255	161	74.9363	72.5375	77.2716	79.751	9.49412e-13	1.06129e-12	4.73448e-06	4.81047e-06	6	31033333	31318333	5893
chr10	101210000	101215000	chr10	101290000	101295000	.	.	.	.	255255	441	168.698	166.792	181.265	163.183	0	0	0	0	5	101213500	101296500	8485
chr10	4850000	4855000	chr10	5280000	5285000	.	.	.	.	255255	207	68.1516	80.2294	84.3325	107.919	9.46418e-29	1.43286e-17	2.11244e-17	1.33734e-08	7	4838928	5282500	26428
chr10	124640000	124645000	chr10	124740000	124745000	.	.	.	.	255255	391	189.775	189.828	210.946	221.766	2.49575e-29	2.82305e-29	3.00397e-13	2.90361e-13	11	124632045	124736590	20251
chr10	21990000	21995000	chr10	22585000	22590000	.	.	.	.	255255	143	73.9052	56.479	87.6209	50.119	5.10997e-08	1.43048e-14	0.00385377	2.12195e-14	1	21992500	22587500	0
chr10	46180000	46185000	chr10	46230000	46235000	.	.	.	.	255255	46	7.5912	12.017	13.8105	1.69577	7.01008e-16	1.20209e-08	7.65922e-06	3.67648e-39	1	46182500	46232500	0
chr10	123040000	123045000	chr10	123130000	123135000	.	.	.	.	255255	346	159.183	141.932	163.252	139.464	6.40286e-18	5.792e-34	1.00886e-17	8.90665e-34	10	123054000	123122000	20797
chr10	48360000	48365000	chr10	48550000	48555000	.	.	.	.	255255	198	81.9529	74.0215	106.191	59.5055	5.65274e-15	3.09332e-25	6.75168e-07	4.38263e-37	1	48362500	48552500	0
chr10	26335000	26340000	chr10	26875000	26880000	.	.	.	.	255255	278	85.8624	83.0892	94.7327	107.317	0	0	0	1.13125e-27	16	26335625	26875937	17932
chr10	35520000	35525000	chr10	35555000	35560000	.	.	.	.	255255	287	139.566	153.838	154.708	153.988	4.80588e-17	9.04682e-07	1.07991e-06	1.10125e-06	2	35520000	35557500	2500
chr10	15900000	15905000	chr10	16775000	16780000	.	.	.	.	255255	226	29.4253	40.06	61.7479	43.6504	0	0	1.54395e-36	0	6	15896666	16783333	24523
chr10	7530000	7535000	chr10	7685000	7690000	.	.	.	.	255255	583	205.75	192.401	233.379	214.164	0	0	0	0	14	7530000	7685000	10607
chr10	90910000	90915000	chr10	91250000	91255000	.	.	.	.	255255	562	129.274	169.199	204.098	226.575	0	0	0	0	17	90906911	91252500	24411
chr10	88935000	88940000	chr10	89210000	89215000	.	.	.	.	255255	473	103.044	104.222	130.318	139.044	0	0	0	0	18	88938333	89213611	25039
chr10	14605000	14610000	chr10	14820000	14825000	.	.	.	.	255255	318	133.921	148.49	141.692	207.327	2.48165e-25	2.64344e-25	3.77579e-25	0.00282323	4	14605000	14827500	10308
chr10	74825000	74830000	chr10	75015000	75020000	.	.	.	.	255255	165	86.8382	72.2153	77.001	94.6928	5.27788e-07	6.91499e-14	9.26385e-14	8.13007e-07	1	74827500	75017500	0
chr10	61140000	61145000	chr10	61730000	61735000	.	.	.	.	255255	103	29.4206	27.6382	28.4716	29.2632	1.8757e-19	2.69552e-19	3.27609e-19	3.42172e-19	6	61141666	61733333	5893
chr10	102915000	102920000	chr10	103330000	103335000	.	.	.	.	255255	146	70.6076	68.4065	83.7061	66.4183	9.71216e-09	1.16528e-08	0.00147183	1.45186e-08	4	102917500	103335000	7500
chr10	119195000	119200000	chr10	119440000	119445000	.	.	.	.	255255	370	155.626	129.048	208.027	111.64	1.04716e-23	2.47e-42	1.01716e-09	0	2	119197500	119445000	2500
chr10	110350000	110355000	chr10	110545000	110550000	.	.	.	.	255255	808	284.781	335.357	357.741	467.208	0	0	0	1.75158e-31	5	110354500	110545500	8544
chr10	26445000	26450000	chr10	26695000	26700000	.	.	.	.	255255	115	46.1674	57.3658	55.5023	69.5941	9.75869e-12	2.08893e-06	2.42306e-06	0.0132428	1	26447500	26697500	0
chr10	45415000	45420000	chr10	45575000	45580000	.	.	.	.	255255	147	62.5742	77.4828	74.2757	80.5966	5.52569e-09	0.000967808	8.22543e-09	0.00107185	1	45417500	45577500	0
chr10	45250000	45255000	chr10	45370000	45375000	.	.	.	.	255255	167	87.6122	78.3025	102.931	68.5211	2.08261e-07	2.61809e-07	0.019634	2.36699e-14	2	45252500	45367500	5000
chr10	30390000	30395000	chr10	30590000	30595000	.	.	.	.	255255	743	190.119	170.988	232.04	221.392	0	0	0	0	13	30397115	30589038	15770
chr10	7260000	7265000	chr10	7405000	7410000	.	.	.	.	255255	332	143.116	131.66	140.912	161.38	1.61288e-29	1.66083e-29	2.44744e-29	1.17638e-14	11	7257500	7409318	15110
chr10	83425000	83430000	chr10	83870000	83875000	.	.	.	.	255255	175	92.2313	86.7727	88.4218	104.799	3.94222e-09	4.7547e-09	5.96746e-09	0.00237275	4	83426250	83870000	6731
chr10	24640000	24645000	chr10	25080000	25085000	.	.	.	.	255255	266	45.7231	54.6219	60.5475	76.4674	0	0	0	0	14	24636428	25081071	18982
chr10	60115000	60120000	chr10	60645000	60650000	.	.	.	.	255255	133	47.4634	46.6448	53.9183	60.1995	1.91683e-18	2.0194e-18	3.18855e-11	3.43196e-11	4	60105000	60648750	12562
chr10	52305000	52310000	chr10	52485000	52490000	.	.	.	.	255255	423	93.7948	91.7305	106.741	110.56	0	0	0	0	14	52310000	52488928	9878
chr10	93550000	93555000	chr10	93855000	93860000	.	.	.	.	255255	187	92.3027	83.9622	104.826	85.4236	5.10573e-12	5.83605e-12	4.75318e-05	7.92188e-12	6	93556666	93860833	6719
chr10	127900000	127910000	chr10	128010000	128020000	.	.	.	.	255255	879	396.164	390.685	429.556	423.706	0	0	0	0	6	127905000	128010000	11180
chr10	103705000	103710000	chr10	104025000	104030000	.	.	.	.	255255	140	68.562	70.6378	91.1469	66.4394	2.5084e-07	3.11756e-07	0.0094614	3.75553e-07	1	103707500	104027500	0
chr10	21080000	21085000	chr10	21265000	21270000	.	.	.	.	255255	192	76.5781	72.4952	85.0734	78.7094	5.66705e-23	5.61742e-23	3.83098e-13	3.8828e-13	8	21079375	21266250	9291
chr10	59620000	59625000	chr10	60030000	60035000	.	.	.	.	255255	294	97.8307	94.9976	118.945	103.619	2.30573e-33	0	3.57855e-33	3.64733e-33	15	59628833	60032500	15059
chr10	6665000	6670000	chr10	7415000	7420000	.	.	.	.	255255	60	18.387	16.806	14.9915	22.2093	3.73171e-09	6.80061e-09	1.3675e-12	1.23525e-05	2	6672500	7417500	5000
chr10	16430000	16440000	chr10	17200000	17210000	.	.	.	.	255255	152	70.641	83.1312	90.7924	82.4129	7.54234e-10	0.000480069	0.000529129	0.00053274	2	16435000	17210000	5000
chr10	17220000	17230000	chr10	18650000	18660000	.	.	.	.	255255	100	38.626	41.4868	48.3642	45.4187	6.51545e-12	1.77113e-06	1.80781e-06	1.80274e-06	2	17220000	18655000	5000
chr10	48610000	48615000	chr10	48650000	48655000	.	.	.	.	255255	440	177.488	160.691	158.766	183.661	0	0	0	0	9	48608055	48653611	10613
chr10	26570000	26575000	chr10	26625000	26630000	.	.	.	.	255255	142	66.6281	69.2482	68.9438	66.5742	8.74059e-08	1.07187e-07	1.29653e-07	1.3086e-07	1	26572500	26627500	0
chr10	93915000	93920000	chr10	94435000	94440000	.	.	.	.	255255	83	31.0849	39.0974	44.7565	46.2079	2.17835e-06	0.00449925	0.00452147	0.00470277	2	93917500	94440000	2500
chr10	76550000	76555000	chr10	77110000	77115000	.	.	.	.	255255	64	20.0885	18.3808	26.3631	21.3313	2.82868e-07	9.61603e-11	0.000435266	4.76105e-07	1	76552500	77112500	0
chr10	50465000	50470000	chr10	50505000	50510000	.	.	.	.	255255	647	242.394	282.134	326.338	308.112	0	0	3.51758e-26	3.3838e-26	14	50443214	50509285	50287
chr10	106705000	106710000	chr10	108535000	108540000	.	.	.	.	255255	61	25.5691	25.5021	28.4577	29.1587	0.00152655	0.00246429	0.00239863	0.00243481	5	106706500	108543500	7211
chr10	22000000	22005000	chr10	22315000	22320000	.	.	.	.	255255	240	93.4402	96.0626	129.946	92.1922	1.25301e-28	1.1944e-28	3.67275e-07	2.02986e-28	8	22001875	22320625	11891
chr10	27280000	27285000	chr10	27965000	27970000	.	.	.	.	255255	33	2.4015	2.66257	2.64476	3.21344	2.68734e-20	6.07262e-17	9.4471e-17	5.67598e-14	2	27280000	27967500	2500
chr10	124535000	124540000	chr10	124745000	124750000	.	.	.	.	255255	469	144.715	135.822	200.088	152.317	0	0	1.70002e-30	0	23	124538152	124742717	17614
chr10	27445000	27450000	chr10	27655000	27660000	.	.	.	.	255255	318	67.9662	71.7021	78.6501	74.0782	0	0	0	0	12	27447083	27654583	12924
chr10	69245000	69250000	chr10	69495000	69500000	.	.	.	.	255255	204	96.7741	94.5471	109.408	108.839	1.06155e-16	1.12997e-16	5.09454e-08	5.19984e-08	7	69242500	69505357	10227
chr10	71955000	71960000	chr10	72045000	72050000	.	.	.	.	255255	417	135.418	146.38	146.201	177.121	0	0	0	8.66446e-37	5	71959500	72048500	6325
chr10	87535000	87540000	chr10	87775000	87780000	.	.	.	.	255255	116	49.1429	49.9919	68.6167	52.2907	9.46687e-07	1.19798e-06	0.00952368	1.47389e-06	1	87537500	87777500	0
chr10	70545000	70550000	chr10	70880000	70885000	.	.	.	.	255255	284	86.2916	78.4374	101.317	92.5423	0	0	1.07936e-29	0	15	70549166	70879166	20343
chr10	52305000	52310000	chr10	52565000	52570000	.	.	.	.	255255	237	88.251	86.2339	109.379	85.7971	1.54244e-27	1.48121e-27	1.5842e-15	2.49077e-27	4	52311250	52565000	6731
chr10	50505000	50510000	chr10	50620000	50625000	.	.	.	.	255255	240	105.987	108.77	112.241	135.961	1.66183e-16	1.82981e-16	2.58086e-16	3.76184e-07	3	50510833	50620833	3727
chr10	88685000	88690000	chr10	88790000	88795000	.	.	.	.	255255	380	182.903	195.645	230.164	219.516	2.53972e-26	1.97245e-11	2.44834e-11	2.37363e-11	16	88690625	88805937	20457
chr10	21275000	21280000	chr10	21735000	21740000	.	.	.	.	255255	127	49.692	49.8054	67.1575	55.8354	1.23444e-09	1.45681e-09	0.000164974	1.94357e-09	5	21280500	21731500	8062
chr10	96640000	96650000	chr10	96740000	96750000	.	.	.	.	255255	1686	754.791	698.995	1024.42	676.006	0	0	1.43142e-24	0	1	96645000	96745000	0
chr10	86710000	86715000	chr10	86750000	86755000	.	.	.	.	255255	301	159.438	143.878	142.47	166.068	4.33803e-09	1.43926e-20	1.97973e-20	7.41181e-09	2	86715000	86752500	2500
chr10	55095000	55100000	chr10	55265000	55270000	.	.	.	.	255255	168	81.7604	80.1487	88.3354	83.2274	1.29763e-07	1.61886e-07	1.95433e-07	1.99535e-07	10	55094500	55263000	19602
chr10	110435000	110440000	chr10	110480000	110485000	.	.	.	.	255255	442	202.57	236.9	258.695	277.021	4.97357e-24	6.24354e-24	8.69719e-09	8.75578e-09	1	110437500	110482500	0
chr10	98165000	98170000	chr10	98305000	98310000	.	.	.	.	255255	272	135.699	139.757	170.671	136.12	1.47794e-13	1.78132e-13	0.000107994	2.34171e-13	3	98170833	98314166	13438
chr10	80660000	80665000	chr10	81015000	81020000	.	.	.	.	255255	186	99.2498	84.7869	82.5733	113.689	4.41275e-05	1.05251e-11	1.38944e-11	6.96111e-05	1	80662500	81017500	0
chr10	97685000	97690000	chr10	98040000	98045000	.	.	.	.	255255	95	44.3911	42.0085	47.2035	49.6678	7.82832e-06	1.03247e-05	1.15112e-05	0.0176685	2	97687500	98040000	2500
chr10	87615000	87620000	chr10	87695000	87700000	.	.	.	.	255255	205	94.3579	115.003	119.369	121.1	5.37759e-17	2.66162e-08	3.25711e-08	3.31926e-08	1	87617500	87697500	0
chr10	24640000	24645000	chr10	24950000	24955000	.	.	.	.	255255	220	64.8289	67.7398	101.559	72.6783	3.81394e-34	3.57935e-34	2.19021e-11	6.29638e-34	4	24643750	24951250	6374
chr10	61900000	61910000	chr10	61980000	61990000	.	.	.	.	255255	1678	751.361	792.255	1073.79	831.28	0	0	1.18521e-23	0	6	61901666	61983333	18634
chr10	48550000	48555000	chr10	48655000	48660000	.	.	.	.	255255	740	134.004	112.612	141.101	153.856	0	0	0	0	16	48553125	48652500	15220
chr10	102225000	102230000	chr10	102480000	102485000	.	.	.	.	255255	397	172.255	167.941	191.824	177.676	4.99195e-31	5.57256e-31	7.3985e-31	7.88576e-31	9	102228055	102475277	12789
chr10	48660000	48665000	chr10	48980000	48985000	.	.	.	.	255255	151	61.5555	61.2405	85.9733	63.0486	5.33419e-10	2.2252e-17	0.000257944	7.99711e-10	2	48660000	48977500	5590
chr10	14195000	14200000	chr10	14970000	14975000	.	.	.	.	255255	69	14.6494	17.0162	20.742	19.857	2.26724e-18	3.25682e-13	5.67202e-09	5.37408e-09	4	14196250	14972500	10078
chr10	27550000	27560000	chr10	28240000	28250000	.	.	.	.	255255	246	130.044	109.076	120.048	112.065	4.84273e-08	1.40752e-17	1.96046e-17	2.06236e-17	2	27560000	28245000	5000
chr10	82790000	82795000	chr10	83160000	83165000	.	.	.	.	255255	103	49.8962	55.858	56.6354	58.8934	0.000559848	0.00078338	0.000825771	0.000859544	1	82792500	83162500	0
chr10	119605000	119610000	chr10	119640000	119645000	.	.	.	.	255255	282	136.299	151.51	162.196	156.355	7.6418e-16	8.91041e-16	5.46683e-06	5.58348e-06	1	119607500	119642500	0
chr10	24080000	24090000	chr10	24960000	24970000	.	.	.	.	255255	86	33.3966	44.2919	43.4076	47.9794	4.85795e-07	0.00351718	0.00354548	0.00353963	1	24085000	24965000	0
chr10	93080000	93085000	chr10	93350000	93355000	.	.	.	.	255255	381	153.666	135.508	153.867	183.17	1.37041e-26	0	2.06705e-26	2.17059e-26	10	93077000	93354000	11511
chr10	96045000	96050000	chr10	96125000	96130000	.	.	.	.	255255	263	116.102	137.455	147.198	159.472	4.28146e-23	1.51495e-11	1.92335e-11	0.00117914	3	96042500	96127500	5000
chr10	89425000	89430000	chr10	89560000	89565000	.	.	.	.	255255	427	113.697	99.7805	113.711	119.227	0	0	0	0	22	89430909	89556136	17897
chr10	7865000	7870000	chr10	9295000	9300000	.	.	.	.	255255	205	77.3124	71.9504	80.1146	91.9837	5.37759e-17	5.73108e-28	8.33879e-17	8.44133e-17	11	7874318	9301136	12365
chr10	85780000	85790000	chr10	86580000	86590000	.	.	.	.	255255	163	69.1305	79.1161	81.5492	89.0801	6.63533e-13	5.477e-06	6.37393e-06	6.39558e-06	1	85785000	86585000	0
chr10	79400000	79405000	chr10	79485000	79490000	.	.	.	.	255255	403	176.201	204.558	217.086	257.582	9.13632e-33	1.38014e-15	1.73477e-15	0.000246862	1	79402500	79487500	0
chr10	24640000	24645000	chr10	24990000	24995000	.	.	.	.	255255	259	85.5558	96.324	137.329	105.284	6.52279e-36	5.95882e-36	1.24266e-10	1.10189e-21	5	24639500	24991500	7071
chr10	103505000	103510000	chr10	103590000	103595000	.	.	.	.	255255	183	95.6619	89.145	107.533	96.0418	5.14044e-11	5.96214e-11	0.000190035	7.90568e-11	1	103507500	103592500	0
chr10	90070000	90080000	chr10	100430000	100440000	.	.	.	.	255255	17	2.14793	2.63941	2.04404	2.37362	5.73722e-05	0.00476664	0.000391169	0.000285207	1	90075000	100435000	0
chr10	30785000	30790000	chr10	31770000	31775000	.	.	.	.	255255	210	80.1538	118.093	139.606	125.424	1.67184e-18	2.58682e-09	0.00484809	0.00488897	2	30785000	31770000	3536
chr10	119685000	119690000	chr10	120335000	120340000	.	.	.	.	255255	73	18.8502	21.0002	24.8559	29.9509	1.30619e-15	1.00533e-10	9.40448e-07	9.81046e-07	7	119685357	120333928	8836
chr10	42995000	43000000	chr10	43060000	43065000	.	.	.	.	255255	239	110.503	119.559	130.848	135.115	3.05816e-16	3.37984e-16	5.37113e-07	5.49578e-07	3	42992500	43062500	5000
chr10	132530000	132540000	chr10	132630000	132640000	.	.	.	.	255255	779	385.536	387.216	415.017	515.968	2.79812e-26	3.03382e-26	4.10727e-26	4.96766e-06	3	132545000	132635000	10000
chr10	95280000	95290000	chr10	95360000	95370000	.	.	.	.	255255	1756	872.522	879.126	853.142	1133.08	0	0	0	2.7958e-33	4	95295000	95360000	15000
chr10	97570000	97575000	chr10	97610000	97615000	.	.	.	.	255255	504	200.245	215.557	271.519	223.627	2.5146e-40	2.89147e-40	6.86027e-19	3.66462e-40	7	97571071	97612500	6429
chr10	41735000	41740000	chr10	41770000	41775000	.	.	.	.	255255	318	157.239	160.272	155.147	187.732	4.2279e-12	5.60963e-12	6.87375e-12	7.17324e-12	3	41727500	41769166	10541
chr10	45230000	45240000	chr10	46220000	46230000	.	.	.	.	255255	250	87.9119	99.9101	136.032	96.3358	6.45797e-32	1.06767e-18	1.65167e-08	1.27205e-31	1	45235000	46225000	0
chr10	46990000	47000000	chr10	50210000	50220000	.	.	.	.	255255	34	11.3176	7.68551	7.10669	11.6578	0.00161823	4.41502e-07	5.95036e-07	0.00430911	1	46995000	50215000	0
chr10	23440000	23450000	chr10	25010000	25020000	.	.	.	.	255255	81	35.5809	40.7167	45.2458	44.6305	1.41561e-05	0.0276193	0.0278138	0.0278478	2	23435000	25015000	10000
chr10	72720000	72725000	chr10	73135000	73140000	.	.	.	.	255255	108	40.2379	50.8441	52.7876	49.5736	1.81877e-09	7.90471e-05	8.72866e-05	9.09346e-05	1	72722500	73137500	0
chr10	90875000	90880000	chr10	91910000	91915000	.	.	.	.	255255	54	19.8433	17.7072	17.8319	24.501	0.000523278	2.2889e-06	2.22674e-06	0.000854349	1	90877500	91912500	0
chr10	37850000	37860000	chr10	38400000	38410000	.	.	.	.	255255	80	28.7165	27.9808	38.5704	20.7711	2.39241e-09	7.37887e-09	5.82309e-05	9.9718e-14	1	37855000	38405000	0
chr10	84540000	84545000	chr10	84715000	84720000	.	.	.	.	255255	183	68.2752	61.8972	74.3875	65.728	9.44061e-20	9.53131e-20	1.39612e-19	1.42877e-19	8	84542500	84712500	10000
chr10	115170000	115175000	chr10	115420000	115425000	.	.	.	.	255255	222	91.0239	88.9911	98.8547	110.85	2.43918e-22	2.43717e-22	7.66107e-12	7.72104e-12	7	115173214	115416785	14914
chr10	115350000	115360000	chr10	116380000	116390000	.	.	.	.	255255	175	80.8783	80.0527	86.2294	87.729	1.00509e-08	1.70712e-08	2.03672e-08	2.09419e-08	2	115355000	116390000	5000
chr10	6200000	6205000	chr10	6400000	6405000	.	.	.	.	255255	470	89.8478	91.7972	80.8404	151.205	0	0	0	0	10	6203000	6407000	11424
chr10	62035000	62040000	chr10	62240000	62245000	.	.	.	.	255255	409	194.997	172.944	189.094	233.129	6.90811e-17	1.67079e-34	2.23212e-34	1.10535e-16	16	62041250	62246250	14252
chr10	68150000	68155000	chr10	68300000	68305000	.	.	.	.	255255	120	58.4845	58.8657	53.0215	76.7222	9.57121e-08	1.17942e-07	1.4167e-07	0.00249839	1	68152500	68302500	0
chr10	6670000	6680000	chr10	9300000	9310000	.	.	.	.	255255	81	31.0085	25.3653	22.8035	35.0977	1.41561e-05	3.11377e-09	4.28978e-14	3.19469e-05	2	6670000	9305000	5000
chr10	64040000	64050000	chr10	67770000	67780000	.	.	.	.	255255	123	52.229	49.6162	59.3435	51.3743	3.78213e-08	7.32844e-08	8.08598e-08	8.20829e-08	1	64045000	67775000	0
chr10	91005000	91010000	chr10	91250000	91255000	.	.	.	.	255255	418	139.311	142.736	184.366	187.688	0	0	3.98514e-37	4.25471e-37	11	91004318	91250227	13461
chr10	91385000	91390000	chr10	91635000	91640000	.	.	.	.	255255	231	90.4337	97.4132	108.225	109.893	2.09166e-25	3.91932e-14	5.32308e-14	5.35878e-14	5	91391500	91635500	6325
chr10	71315000	71320000	chr10	71705000	71710000	.	.	.	.	255255	295	107.584	98.8147	131.54	107.399	1.01324e-33	9.48398e-34	7.33338e-19	1.61353e-33	9	71313611	71706388	11772
chr10	116680000	116685000	chr10	116790000	116795000	.	.	.	.	255255	330	148.276	126.255	149.852	123.391	6.6339e-29	6.85031e-29	1.00478e-28	1.03292e-28	15	116683166	116784500	19394
chr10	72380000	72385000	chr10	72635000	72640000	.	.	.	.	255255	119	57.0893	65.1224	76.3594	59.9508	1.72031e-07	0.00335681	0.00349654	2.67282e-07	1	72382500	72637500	0
chr10	7750000	7760000	chr10	9300000	9310000	.	.	.	.	255255	211	97.3987	85.1757	81.0617	128.441	3.13974e-09	3.59954e-18	4.63096e-18	0.00797695	1	7755000	9305000	0
chr10	37860000	37870000	chr10	38090000	38100000	.	.	.	.	255255	397	145.612	205.348	240.211	203.04	0	3.05005e-14	3.91823e-14	4.09467e-14	5	37857000	38103000	16971
chr10	27740000	27745000	chr10	28180000	28185000	.	.	.	.	255255	163	50.7041	52.3983	56.6848	59.52	6.11631e-22	6.10751e-22	9.47604e-22	9.90164e-22	8	27741875	28181875	10643
chr10	9335000	9340000	chr10	11750000	11755000	.	.	.	.	255255	29	5.1097	6.91981	9.25077	9.27552	5.63917e-07	0.000203643	0.00543098	0.00545419	1	9337500	11752500	0
chr10	53590000	53600000	chr10	55260000	55270000	.	.	.	.	255255	173	70.0731	68.1262	76.7645	71.9407	5.46051e-16	9.75333e-16	1.25789e-15	1.20994e-15	3	53601666	55268333	7454
chr10	86395000	86400000	chr10	86895000	86900000	.	.	.	.	255255	69	24.2787	22.7692	26.1207	22.156	3.10355e-09	4.92415e-09	1.71695e-05	5.37408e-09	2	86397500	86900000	2500
chr10	82810000	82815000	chr10	83870000	83875000	.	.	.	.	255255	155	48.129	53.702	52.7336	72.5482	3.91797e-28	7.44188e-19	1.09863e-18	6.93216e-11	11	82802954	83869318	10928
chr10	41735000	41740000	chr10	42660000	42665000	.	.	.	.	255255	25	4.97278	4.49594	6.478	3.39091	0.00012978	1.15793e-05	0.00928498	2.47665e-07	1	41737500	42662500	0
chr10	110305000	110310000	chr10	110600000	110605000	.	.	.	.	255255	459	158.606	110.014	187.898	107.069	0	0	0	0	13	110311730	110600576	11201
chr10	69230000	69235000	chr10	69390000	69395000	.	.	.	.	255255	633	234.495	196.66	231.851	243.013	0	0	0	0	29	69239913	69393534	21172
chr10	930000	935000	chr10	985000	990000	.	.	.	.	255255	568	235.531	257.371	277.704	301.515	0	7.33215e-33	8.38756e-33	8.38797e-33	11	935227	986590	16763
chr10	121600000	121605000	chr10	121895000	121900000	.	.	.	.	255255	81	38.8122	37.7846	39.0092	47.8993	7.90315e-06	1.09363e-05	0.0101344	0.010488	4	121607500	121896250	13750
chr10	114880000	114885000	chr10	115420000	115425000	.	.	.	.	255255	71	29.5749	25.8466	30.783	31.2783	2.65483e-06	3.92469e-06	4.13923e-06	0.00320445	3	114879166	115422500	5270
chr10	27220000	27225000	chr10	27355000	27360000	.	.	.	.	255255	307	83.2216	71.6199	68.9509	124.333	0	0	0	4.85341e-22	12	27229583	27359583	14732
chr10	33330000	33335000	chr10	34520000	34525000	.	.	.	.	255255	122	34.1225	35.0095	48.2973	35.4092	2.17573e-21	2.5001e-21	4.72687e-14	3.47486e-21	2	33332500	34520000	2500
chr10	112470000	112475000	chr10	113125000	113130000	.	.	.	.	255255	81	41.6729	31.69	41.5661	30.614	0.00676083	1.09363e-05	0.0101344	1.4326e-09	2	112475000	113125000	3536
chr10	93550000	93555000	chr10	93675000	93680000	.	.	.	.	255255	265	117.686	107.924	121.696	119.79	1.03414e-23	1.05514e-23	1.62648e-23	1.63684e-23	9	93554722	93678611	12826
chr10	120420000	120425000	chr10	120735000	120740000	.	.	.	.	255255	368	94.7871	90.129	108.358	97.6101	0	0	0	0	13	120425192	120738269	13015
chr10	93815000	93820000	chr10	94315000	94320000	.	.	.	.	255255	108	43.9936	40.8697	42.4707	47.574	1.81877e-09	2.15093e-09	2.60626e-09	2.79458e-09	4	93820000	94318750	6731
chr10	60090000	60100000	chr10	60640000	60650000	.	.	.	.	255255	291	133.976	117.241	116.044	147.495	1.17279e-17	9.25294e-32	1.31756e-31	2.24288e-17	6	60108333	60646666	18634
chr10	29995000	30000000	chr10	30240000	30245000	.	.	.	.	255255	290	106.207	100.272	121.349	113.064	5.93228e-32	5.57262e-32	9.17181e-32	9.34977e-32	12	30001250	30238333	19530
chr10	58780000	58785000	chr10	60030000	60035000	.	.	.	.	255255	68	25.8412	23.5791	31.221	22.0816	2.18558e-05	1.25455e-08	0.0120854	1.3683e-08	1	58782500	60032500	0
chr10	67785000	67790000	chr10	68155000	68160000	.	.	.	.	255255	245	104.334	96.146	104.394	112.246	7.36936e-18	1.66643e-30	1.15005e-17	1.1518e-17	7	67789642	68156071	8835
chr10	23990000	23995000	chr10	24505000	24510000	.	.	.	.	255255	262	88.1142	96.0909	126.329	106.692	3.98638e-37	3.63631e-37	3.08305e-11	1.35834e-22	15	23993166	24512166	11785
chr10	17020000	17025000	chr10	17225000	17230000	.	.	.	.	255255	168	67.1798	87.542	104.51	75.5696	7.72876e-15	1.61886e-07	0.0153615	1.16565e-14	1	17022500	17227500	0
chr10	67855000	67860000	chr10	68155000	68160000	.	.	.	.	255255	521	122.426	132.747	167.669	160.469	0	0	0	0	15	67859166	68153833	18336
chr10	87655000	87660000	chr10	88550000	88555000	.	.	.	.	255255	118	41.4782	39.8358	44.4336	36.7387	9.0143e-13	1.0096e-12	1.28316e-12	2.38123e-19	4	87657500	88556250	8004
chr10	78850000	78855000	chr10	79195000	79200000	.	.	.	.	255255	148	48.0493	50.1207	51.6001	64.6035	6.83622e-25	2.6573e-16	3.74025e-16	4.67383e-09	6	78855000	79197500	15207
chr10	71895000	71900000	chr10	72275000	72280000	.	.	.	.	255255	164	66.198	76.6464	90.6165	77.7814	1.25081e-13	1.37856e-13	1.2537e-06	1.27933e-06	1	71897500	72277500	0
chr10	45370000	45375000	chr10	45460000	45465000	.	.	.	.	255255	215	90.7849	92.0819	104.331	103.491	4.59305e-20	4.67487e-20	2.81505e-10	2.86273e-10	2	45372500	45460000	2500
chr10	16580000	16585000	chr10	16775000	16780000	.	.	.	.	255255	142	69.0884	76.5551	80.0658	86.5806	8.74059e-08	1.07187e-07	0.00523531	0.00531713	2	16577500	16782500	7071
chr10	63165000	63170000	chr10	63630000	63635000	.	.	.	.	255255	452	184.759	152.925	179.001	206.97	0	0	0	3.12189e-26	10	63168500	63628500	14036
chr10	59860000	59865000	chr10	60030000	60035000	.	.	.	.	255255	327	94.7835	130.168	144.068	170.725	0	5.62139e-28	8.18713e-28	1.24905e-13	5	59862500	60032500	5000
chr10	85785000	85790000	chr10	86375000	86380000	.	.	.	.	255255	96	35.397	28.9347	35.4431	35.6567	1.31944e-10	5.84158e-16	2.05527e-10	2.12857e-10	3	85789166	86374166	3727
chr10	45230000	45240000	chr10	50100000	50110000	.	.	.	.	255255	18	1.32077	1.96075	1.97294	3.10478	1.15499e-08	1.75044e-06	2.76047e-06	0.00104696	1	45235000	50105000	0
chr10	63205000	63210000	chr10	63715000	63720000	.	.	.	.	255255	552	182.598	205.508	193.754	281.713	0	0	0	5.15055e-29	10	63213500	63716000	16225
chr10	97405000	97410000	chr10	97610000	97615000	.	.	.	.	255255	114	52.0256	55.2958	58.7056	57.452	2.82099e-06	3.61053e-06	4.17551e-06	4.38673e-06	2	97407500	97615000	2500
chr10	12705000	12710000	chr10	12900000	12905000	.	.	.	.	255255	132	73.8101	64.2676	63.4902	74.1577	1.262e-05	1.64775e-05	1.85989e-05	1.88481e-05	1	12707500	12902500	0
chr10	99430000	99435000	chr10	99615000	99620000	.	.	.	.	255255	456	205.989	177.85	179.041	216.615	2.15272e-27	0	0	3.25851e-27	17	99437205	99612205	21217
chr10	124550000	124555000	chr10	124675000	124680000	.	.	.	.	255255	178	83.2117	98.4605	112.196	94.2378	8.07695e-10	0.000848867	0.00094697	1.24521e-09	1	124552500	124677500	0
chr10	9330000	9340000	chr10	11030000	11040000	.	.	.	.	255255	195	92.6989	85.312	121.788	80.0076	1.06179e-13	1.6733e-13	6.60279e-06	2.15082e-13	1	9335000	11035000	0
chr10	118565000	118570000	chr10	118720000	118725000	.	.	.	.	255255	383	89.1421	80.3733	103.375	95.3595	0	0	0	0	16	118570625	118718437	12918
chr10	45790000	45795000	chr10	50130000	50135000	.	.	.	.	255255	31	0.962736	3.01345	0.567978	1.64251	1.26762e-25	5.62427e-15	3.82698e-25	5.48243e-20	3	45795833	50134166	3728
chr10	103910000	103920000	chr10	104340000	104350000	.	.	.	.	255255	312	157.278	155.326	164.706	182.437	1.12483e-10	1.48536e-10	1.89303e-10	1.94121e-10	4	103900000	104345000	15000
chr10	80445000	80450000	chr10	80920000	80925000	.	.	.	.	255255	66	22.1766	31.4865	36.3523	31.9518	4.92916e-08	0.0279712	0.0270663	0.0273536	2	80450000	80922500	2500
chr10	22250000	22255000	chr10	22720000	22725000	.	.	.	.	255255	103	43.7892	43.2312	58.5374	41.2022	5.63596e-08	6.93189e-08	0.000825771	8.7619e-08	1	22252500	22722500	0
chr10	27240000	27245000	chr10	27500000	27505000	.	.	.	.	255255	79	25.3121	27.086	25.9481	33.1966	4.8826e-09	6.83221e-09	7.63943e-09	4.30486e-05	1	27242500	27502500	0
chr10	106625000	106630000	chr10	108540000	108545000	.	.	.	.	255255	37	13.1208	13.2767	12.7398	13.4306	0.00628277	0.0120896	0.00991209	0.00982497	2	106625000	108542500	2500
chr10	59620000	59625000	chr10	60205000	60210000	.	.	.	.	255255	119	50.4232	50.5373	60.097	55.2552	1.72031e-07	2.13288e-07	2.54282e-07	2.67282e-07	8	59627500	60206250	10680
chr10	15850000	15860000	chr10	17200000	17210000	.	.	.	.	255255	143	63.2287	73.8377	77.6508	69.5024	1.26554e-07	2.33413e-07	0.0104462	2.73047e-07	2	15855000	17215000	10000
chr10	87560000	87565000	chr10	87615000	87620000	.	.	.	.	255255	290	136.624	158.762	189.656	183.256	8.75297e-18	3.27161e-07	3.9228e-07	3.98417e-07	1	87562500	87617500	0
chr10	131885000	131890000	chr10	132020000	132025000	.	.	.	.	255255	678	147.085	121.293	160.495	136.006	0	0	0	0	21	131887500	132022023	17633
chr10	131635000	131640000	chr10	131740000	131745000	.	.	.	.	255255	145	68.4357	71.8081	75.3186	70.3675	1.70152e-08	2.05306e-08	2.52666e-08	2.54592e-08	2	131637500	131750000	7500
chr10	15430000	15440000	chr10	16770000	16780000	.	.	.	.	255255	83	38.8258	36.0252	43.2437	38.169	3.83256e-06	8.70723e-06	0.0127336	8.9724e-06	1	15435000	16775000	0
chr10	11170000	11180000	chr10	12040000	12050000	.	.	.	.	255255	114	54.6096	52.6503	60.1552	58.29	6.53377e-06	1.3042e-05	1.40284e-05	1.44064e-05	1	11175000	12045000	0
chr10	84265000	84270000	chr10	84430000	84435000	.	.	.	.	255255	200	93.4243	97.2619	120.197	91.1437	1.53089e-15	2.42199e-07	2.90882e-07	2.38441e-15	1	84267500	84432500	0
chr10	7255000	7260000	chr10	7685000	7690000	.	.	.	.	255255	114	47.1202	53.2482	52.0988	67.8947	2.11683e-11	3.61053e-06	4.17551e-06	0.0179629	1	7257500	7687500	0
chr10	77390000	77395000	chr10	77640000	77645000	.	.	.	.	255255	380	139.789	127.836	139.984	167.637	0	0	0	4.03331e-26	9	77395277	77643611	12273
chr10	99390000	99395000	chr10	99610000	99615000	.	.	.	.	255255	332	105.83	90.1965	97.5878	129.427	0	0	0	2.50634e-29	9	99390833	99610277	8461
chr10	17650000	17660000	chr10	18650000	18660000	.	.	.	.	255255	238	123.964	104.637	103.068	137	1.06757e-06	2.05528e-15	2.8053e-15	1.9356e-06	1	17655000	18655000	0
chr10	59620000	59630000	chr10	60640000	60650000	.	.	.	.	255255	129	48.5061	56.0963	58.7587	59.6652	1.25362e-16	1.56946e-09	1.73495e-09	1.80567e-09	2	59630000	60650000	7071
chr10	93115000	93120000	chr10	93290000	93295000	.	.	.	.	255255	364	147.752	186.237	186.589	223.836	4.69585e-40	4.06747e-22	5.23861e-22	8.13e-09	6	93119166	93285000	12937
chr10	35635000	35640000	chr10	36880000	36885000	.	.	.	.	255255	231	43.9614	39.592	43.1505	54.0083	0	0	0	0	13	35635961	36878653	13077
chr10	101605000	101610000	chr10	102070000	102075000	.	.	.	.	255255	111	41.3827	50.2647	64.5009	55.964	2.04654e-10	1.76627e-05	0.0418547	2.09107e-05	4	101601250	102073750	8839
chr10	66185000	66190000	chr10	66930000	66935000	.	.	.	.	255255	68	30.3216	26.5664	24.0073	32.3203	2.18558e-05	3.26271e-05	1.4219e-08	0.0122384	2	66185000	66932500	2500
chr10	45425000	45430000	chr10	45460000	45465000	.	.	.	.	255255	370	192.958	176.733	176.9	221.644	5.84759e-10	1.23683e-23	1.59094e-23	9.88977e-10	1	45427500	45462500	0
chr10	45245000	45250000	chr10	45945000	45950000	.	.	.	.	255255	57	17.4496	19.6381	27.1165	21.5702	7.52635e-08	0.000113268	0.0170527	0.00011514	1	45247500	45947500	0
chr10	71955000	71960000	chr10	72220000	72225000	.	.	.	.	255255	115	44.2967	50.0747	46.5537	60.2448	9.75869e-12	2.08893e-06	1.39088e-11	2.56097e-06	1	71957500	72222500	0
chr10	103710000	103715000	chr10	104205000	104210000	.	.	.	.	255255	102	36.0345	30.1795	37.8386	32.0493	7.8077e-13	8.32914e-19	1.19571e-12	1.25408e-12	3	103717500	104207500	5000
chr10	42635000	42640000	chr10	42780000	42785000	.	.	.	.	255255	219	85.8624	83.4873	103.987	89.4077	2.36785e-21	2.38624e-21	3.68595e-11	3.77365e-21	8	42636875	42784375	16129
chr10	14995000	15000000	chr10	15100000	15105000	.	.	.	.	255255	189	94.579	92.792	96.718	112.506	1.55472e-12	1.75862e-12	2.35931e-12	2.36267e-05	10	14991000	15100000	19455
chr10	17605000	17610000	chr10	17740000	17745000	.	.	.	.	255255	805	134.23	113.019	136.604	137.503	0	0	0	0	22	17612500	17741590	17539
chr10	72220000	72225000	chr10	72335000	72340000	.	.	.	.	255255	411	198.886	145.902	127.601	244.265	2.74675e-17	0	0	4.07079e-05	2	72222500	72340000	2500
chr10	80855000	80860000	chr10	81015000	81020000	.	.	.	.	255255	171	79.2333	75.8056	82.7671	72.9222	3.0141e-08	9.48321e-16	4.5357e-08	1.34458e-15	3	80857500	81017500	5000
chr10	13205000	13210000	chr10	13300000	13305000	.	.	.	.	255255	326	128.146	136.541	149.384	159.974	1.08337e-27	1.12829e-27	1.64021e-27	1.98027e-13	6	13206666	13300000	13176
chr10	73845000	73850000	chr10	73935000	73940000	.	.	.	.	255255	503	179.319	217.739	233.549	318.531	0	5.6526e-40	7.4479e-40	5.20999e-05	8	73842500	73938750	10078
chr10	39125000	39130000	chr10	39175000	39180000	.	.	.	.	255255	268	131.631	129.173	138.817	137.956	1.09191e-12	1.33072e-12	1.7068e-12	1.73513e-12	1	39127500	39177500	0
chr10	73250000	73255000	chr10	73410000	73415000	.	.	.	.	255255	250	133.887	121.365	138.769	114.651	4.1433e-09	3.1327e-19	6.58381e-09	4.6008e-19	4	73253750	73412500	10078
chr10	94360000	94365000	chr10	94545000	94550000	.	.	.	.	255255	207	96.1904	102.498	105.103	115.141	1.35923e-17	1.06336e-08	1.30814e-08	1.33734e-08	5	94350500	94547500	15133
chr10	94630000	94635000	chr10	95130000	95135000	.	.	.	.	255255	127	60.8588	51.5786	66.9232	51.9752	1.23444e-09	1.45681e-09	0.000164974	1.94357e-09	2	94630000	95132500	2500
chr10	16110000	16115000	chr10	16775000	16780000	.	.	.	.	255255	100	37.6958	36.1274	47.5418	44.5087	4.53149e-12	5.63424e-12	5.6491e-07	6.04533e-07	7	16118928	16779642	8632
chr10	104405000	104410000	chr10	104925000	104930000	.	.	.	.	255255	58	24.1885	22.2063	24.0494	22.5408	3.3902e-05	5.4965e-05	5.45553e-05	5.59976e-05	1	104407500	104927500	0
chr10	67695000	67700000	chr10	67775000	67780000	.	.	.	.	255255	746	140.274	141.084	156.067	223.628	0	0	0	0	18	67689166	67775555	38091
chr10	20585000	20590000	chr10	20635000	20640000	.	.	.	.	255255	297	128.455	148.894	169.632	158.63	1.46138e-19	1.63341e-19	3.2468e-08	3.31095e-08	1	20587500	20637500	0
chr10	129470000	129475000	chr10	130105000	130110000	.	.	.	.	255255	73	22.9563	29.1416	35.7588	29.8622	6.22648e-11	8.80397e-07	0.00118019	9.81046e-07	2	129467500	130110000	5590
chr10	117540000	117545000	chr10	118240000	118245000	.	.	.	.	255255	274	82.0345	108.315	92.782	154.621	2.361e-42	1.44883e-26	3.971e-42	6.26075e-05	6	117544166	118241666	9317
chr10	18690000	18695000	chr10	19785000	19790000	.	.	.	.	255255	52	18.726	15.9216	20.2906	16.0404	7.56956e-06	1.34119e-05	0.00287217	1.36343e-05	1	18692500	19787500	0
chr10	125860000	125870000	chr10	126740000	126750000	.	.	.	.	255255	77	36.0292	28.1607	30.4413	36.8556	0.000159974	9.3675e-08	9.19179e-08	0.000351976	1	125865000	126745000	0
chr10	72460000	72465000	chr10	73050000	73055000	.	.	.	.	255255	109	53.5151	53.7169	52.3827	59.5603	3.64311e-05	4.84625e-05	5.38913e-05	5.63752e-05	1	72462500	73052500	0
chr10	102830000	102835000	chr10	103060000	103065000	.	.	.	.	255255	318	129.374	138.756	158.754	160.763	2.48165e-25	2.64344e-25	6.87375e-12	7.17324e-12	11	102837045	103066136	14687
chr10	13160000	13165000	chr10	13350000	13355000	.	.	.	.	255255	261	126.277	106.705	135.96	100.416	3.13438e-11	1.79163e-22	4.92357e-11	2.74054e-22	3	13162500	13347500	5000
chr10	70920000	70925000	chr10	71285000	71290000	.	.	.	.	255255	191	82.9164	69.7945	82.3157	93.6077	4.61966e-13	1.3057e-22	7.0405e-13	7.14689e-13	10	70916000	71285000	23633
chr10	90910000	90915000	chr10	91085000	91090000	.	.	.	.	255255	249	102.185	112.187	132.186	117.898	5.66816e-19	6.04706e-19	1.00273e-08	8.83532e-19	3	90909166	91082500	8333
chr10	38920000	38930000	chr10	39360000	39370000	.	.	.	.	255255	91	39.1703	35.0907	48.3464	36.8434	0.000142134	2.88794e-08	0.000320052	2.97029e-08	1	38925000	39365000	0
chr10	11435000	11440000	chr10	11600000	11605000	.	.	.	.	255255	142	62.4148	66.0079	78.4093	62.0959	8.74059e-08	1.07187e-07	0.00523531	1.3086e-07	1	11437500	11602500	0
chr10	26450000	26460000	chr10	26850000	26860000	.	.	.	.	255255	175	81.9365	94.9145	92.962	116.005	1.00509e-08	1.70712e-08	2.03672e-08	0.00591193	1	26455000	26855000	0
chr10	119700000	119710000	chr10	123840000	123850000	.	.	.	.	255255	31	7.28946	6.64323	7.00366	7.31835	5.79145e-06	2.29188e-05	3.02122e-05	2.51618e-05	1	119705000	123845000	0
chr10	110980000	110985000	chr10	111015000	111020000	.	.	.	.	255255	248	101.518	123.191	118.536	114.983	1.08222e-18	1.23697e-08	1.69887e-18	1.68577e-18	1	110982500	111017500	0
chr10	85790000	85800000	chr10	86110000	86120000	.	.	.	.	255255	218	108.388	122.414	136.127	126.607	1.0001e-10	0.00115721	0.00124395	0.00127133	1	85795000	86115000	0
chr10	80380000	80385000	chr10	80505000	80510000	.	.	.	.	255255	433	142.143	144.531	177.762	181.551	0	0	6.494e-42	6.963e-42	12	80384166	80511666	16181
chr10	46785000	46790000	chr10	47550000	47555000	.	.	.	.	255255	33	0.179124	0.723313	0.482764	0.4139	2.09554e-28	1.2467e-27	6.75927e-28	4.74821e-28	1	46787500	47552500	0
chr10	117540000	117545000	chr10	117755000	117760000	.	.	.	.	255255	288	135.681	136.914	153.959	157.063	2.73395e-17	3.12645e-17	7.73845e-07	7.86923e-07	7	117543928	117753214	14726
chr10	70270000	70275000	chr10	70355000	70360000	.	.	.	.	255255	733	282.531	319.046	345.264	409.894	0	0	0	2.31111e-18	12	70274166	70360000	21032
chr10	46560000	46570000	chr10	48440000	48450000	.	.	.	.	255255	48	3.03349	15.911	17.2923	17.4458	1.52709e-33	0.000607731	0.000601234	0.000547704	1	46565000	48445000	0
chr10	58175000	58180000	chr10	58285000	58290000	.	.	.	.	255255	434	164.735	138.323	153.455	171.812	1.687e-42	0	2.46e-42	2.639e-42	25	58181900	58287900	32704
chr10	17605000	17610000	chr10	18105000	18110000	.	.	.	.	255255	125	23.318	26.7392	36.0856	34.1717	5.5078e-41	3.86456e-31	1.24054e-22	1.32881e-22	10	17608000	18104500	9962
chr10	73885000	73890000	chr10	74100000	74105000	.	.	.	.	255255	426	180.405	162.676	219.324	180.617	8.44257e-40	9.15671e-40	3.24447e-20	1.32378e-39	12	73890000	74092916	16271
chr10	34990000	34995000	chr10	35210000	35215000	.	.	.	.	255255	168	81.5213	83.9698	91.8957	103.312	1.29763e-07	1.61886e-07	1.95433e-07	0.0156344	4	34996250	35216250	6374
chr10	16840000	16845000	chr10	17430000	17435000	.	.	.	.	255255	134	34.3162	28.7674	37.2289	28.1861	2.94187e-27	1.6841e-36	4.46159e-27	2.32873e-36	7	16839642	17428928	12657
chr10	89260000	89265000	chr10	89560000	89565000	.	.	.	.	255255	204	60.6127	62.4378	68.3304	81.49	2.93447e-40	1.42797e-27	2.25068e-27	1.66083e-16	10	89263000	89563500	11011
chr10	98260000	98270000	chr10	98660000	98670000	.	.	.	.	255255	130	66.5225	61.9329	64.4766	67.1268	6.95277e-05	0.000138075	0.00015447	0.000151933	1	98265000	98665000	0
chr10	123040000	123045000	chr10	123550000	123555000	.	.	.	.	255255	323	114.072	131.977	141.165	153.684	0	8.9905e-27	1.29265e-26	7.7901e-13	12	123045000	123561250	12562
chr10	60235000	60240000	chr10	60430000	60435000	.	.	.	.	255255	261	59.1873	60.1954	58.7415	93.3223	0	0	0	1.68703e-36	8	60240000	60431875	17511
chr10	132540000	132545000	chr10	132575000	132580000	.	.	.	.	255255	395	185.765	210.017	215.601	196.384	1.8556e-30	4.47502e-14	5.6027e-14	5.40188e-14	2	132540000	132577500	2500
chr10	87870000	87875000	chr10	87925000	87930000	.	.	.	.	255255	578	286.408	284.029	370.847	316.791	2.0051e-35	2.51768e-35	4.39518e-14	4.29891e-14	6	87871666	87926666	18296
chr10	117130000	117135000	chr10	117530000	117535000	.	.	.	.	255255	51	17.019	18.7174	18.6788	23.4645	1.76989e-05	3.13647e-05	3.00082e-05	0.00509349	1	117132500	117532500	0
chr10	57340000	57345000	chr10	57655000	57660000	.	.	.	.	255255	301	89.6419	88.5064	98.2778	102.007	0	0	1.07581e-35	1.09829e-35	14	57340000	57655714	13448
chr10	78300000	78310000	chr10	79340000	79350000	.	.	.	.	255255	151	67.4305	74.3217	88.2652	77.3485	1.3736e-09	2.48704e-09	0.000757111	0.000761283	1	78305000	79345000	0
chr10	30435000	30440000	chr10	30485000	30490000	.	.	.	.	255255	430	161.074	202.127	244.485	268.4	4.4309e-41	3.37848e-21	2.97917e-07	2.99862e-07	3	30445833	30489166	8498
chr10	25875000	25880000	chr10	26560000	26565000	.	.	.	.	255255	67	30.6238	32.5295	37.4039	35.0846	4.24141e-05	0.0187219	0.0182413	0.0184399	2	25875000	26560000	3536
chr10	80695000	80700000	chr10	80920000	80925000	.	.	.	.	255255	279	105.208	114.664	147.895	113.994	3.34904e-28	3.25362e-28	5.9517e-15	5.26822e-28	13	80699807	80928269	15997
chr10	75635000	75640000	chr10	75900000	75905000	.	.	.	.	255255	153	70.6037	74.7387	76.0208	79.4278	1.58432e-10	1.83739e-10	2.349e-10	0.000124275	1	75637500	75902500	0
chr10	51060000	51065000	chr10	51420000	51425000	.	.	.	.	255255	198	72.4451	74.0954	92.433	91.2407	3.16589e-25	3.09332e-25	8.68009e-15	8.77513e-15	5	51066500	51423500	8485
chr10	32370000	32375000	chr10	33005000	33010000	.	.	.	.	255255	125	69.7141	56.7838	55.7784	65.0446	0.000255769	5.32963e-09	6.60977e-09	0.000378976	4	32373750	33003750	6374
chr10	80450000	80455000	chr10	80585000	80590000	.	.	.	.	255255	153	67.2125	83.612	94.8218	94.7623	1.58432e-10	0.000109141	0.000122301	0.000124275	6	80445833	80595000	10035
chr10	95130000	95135000	chr10	95600000	95605000	.	.	.	.	255255	245	102.792	82.7302	99.9308	102.69	7.36936e-18	1.66643e-30	1.15005e-17	1.1518e-17	6	95131666	95598333	7169
chr10	77170000	77175000	chr10	77750000	77755000	.	.	.	.	255255	116	58.1053	51.5218	77.1635	50.2843	9.46687e-07	1.19798e-06	0.00952368	1.47389e-06	2	77170000	77755000	3536
chr10	38350000	38360000	chr10	38400000	38410000	.	.	.	.	255255	62	30.7646	26.4069	29.7241	30.064	0.0013877	0.00340813	0.00315673	0.00319426	1	38355000	38405000	0
chr10	6840000	6845000	chr10	7405000	7410000	.	.	.	.	255255	90	36.1603	36.3945	36.6752	41.8083	1.53341e-08	1.9677e-08	2.32287e-08	0.000184351	1	6842500	7407500	0
chr10	23160000	23170000	chr10	24500000	24510000	.	.	.	.	255255	130	62.2182	70.61	75.8435	76.7449	6.95277e-05	0.000138075	0.00015447	0.000151933	1	23165000	24505000	0
chr10	45005000	45010000	chr10	45225000	45230000	.	.	.	.	255255	161	91.6131	70.2608	88.5111	73.4398	3.13166e-06	1.06129e-12	4.73448e-06	1.43503e-12	7	45008928	45234642	11157
chr10	6105000	6110000	chr10	6400000	6405000	.	.	.	.	255255	326	57.0612	57.0959	56.167	99.7286	0	0	0	0	13	6103269	6406346	16231
chr10	79405000	79410000	chr10	79465000	79470000	.	.	.	.	255255	398	161.268	201.597	212.842	244.718	2.57907e-31	1.23499e-14	1.55715e-14	0.00070506	3	79402500	79452500	18028
chr10	123040000	123045000	chr10	123380000	123385000	.	.	.	.	255255	242	75.2553	83.9688	111.342	88.3178	0	2.19905e-29	7.53561e-17	3.72611e-29	4	123041250	123381250	8839
chr10	100340000	100345000	chr10	100515000	100520000	.	.	.	.	255255	339	116.428	128.184	139.234	152.185	0	1.05531e-31	1.57336e-31	1.60007e-31	13	100339423	100518269	17222
chr10	7685000	7690000	chr10	9300000	9305000	.	.	.	.	255255	101	46.5821	37.5685	30.292	54.4462	2.06679e-07	2.34944e-12	3.0491e-18	0.00195411	2	7687500	9300000	2500
chr10	102730000	102735000	chr10	103060000	103065000	.	.	.	.	255255	132	68.0366	64.798	75.7173	67.9566	1.262e-05	1.64775e-05	1.85989e-05	1.88481e-05	2	102727500	103065000	5590
chr10	95755000	95760000	chr10	95835000	95840000	.	.	.	.	255255	737	270.045	285.84	307.642	462.799	0	0	0	5.51055e-19	4	95755000	95836250	12562
chr10	50730000	50735000	chr10	79895000	79900000	.	.	.	.	255255	21	0.248009	0.314776	0.117066	0.225958	9.41891e-13	3.78949e-12	2.11681e-12	2.00452e-12	2	50727500	79892500	7071
chr10	87655000	87660000	chr10	87855000	87860000	.	.	.	.	255255	118	60.5646	53.3538	71.3266	48.3883	3.06809e-07	3.83111e-07	0.00491609	1.36798e-12	1	87657500	87857500	0
chr10	110850000	110860000	chr10	113850000	113860000	.	.	.	.	255255	63	18.8132	21.2751	22.4033	28.3852	1.06115e-10	2.14814e-06	1.98087e-06	0.00179827	1	110855000	113855000	0
chr10	58780000	58785000	chr10	59620000	59625000	.	.	.	.	255255	235	71.1084	55.4117	66.9918	60.081	9.1034e-41	0	1.50924e-40	0	9	58785277	59620833	8461
chr10	21080000	21085000	chr10	21735000	21740000	.	.	.	.	255255	49	15.4962	19.9161	24.4076	20.952	1.72843e-07	0.0159727	0.0145063	0.0146051	2	21082500	21732500	5000
chr10	132330000	132340000	chr10	133380000	133390000	.	.	.	.	255255	114	48.0114	51.1915	66.0671	52.9336	4.0757e-11	1.3042e-05	0.0493563	1.44064e-05	2	132335000	133380000	5000
chr10	70920000	70925000	chr10	71205000	71210000	.	.	.	.	255255	260	105.747	107.935	128.844	121.368	3.48957e-22	3.59587e-22	7.83188e-11	5.48311e-22	18	70924722	71208333	17719
chr10	49310000	49315000	chr10	49500000	49505000	.	.	.	.	255255	102	47.3686	51.9869	50.2861	58.1533	1.08783e-07	0.00120059	0.00125705	0.00130451	1	49312500	49502500	0
chr10	128080000	128085000	chr10	128145000	128150000	.	.	.	.	255255	555	237.15	230.211	257.982	267.287	0	0	1.03747e-29	1.04103e-29	14	128077500	128145714	20779
chr10	110805000	110810000	chr10	110840000	110845000	.	.	.	.	255255	632	267.163	271.144	309.622	259.325	0	0	2.90643e-23	0	2	110805000	110842500	2500
chr10	90910000	90915000	chr10	91005000	91010000	.	.	.	.	255255	395	171.083	158.587	201.965	153.158	1.8556e-30	2.07846e-30	5.6027e-14	0	7	90913928	90996785	21104
chr10	32300000	32310000	chr10	33240000	33250000	.	.	.	.	255255	72	33.3071	32.3519	32.7635	33.0247	0.00227878	0.00508318	0.00504722	0.00497154	1	32305000	33245000	0
chr10	42860000	42865000	chr10	43095000	43100000	.	.	.	.	255255	150	68.8115	69.3873	69.2902	83.7806	9.66098e-10	1.13633e-09	1.43592e-09	0.000376802	7	42866785	43102500	11518
chr10	26505000	26510000	chr10	26540000	26545000	.	.	.	.	255255	313	146.832	167.15	184.862	157.339	6.726e-24	4.82055e-11	5.88076e-11	6.08623e-11	2	26497500	26542500	10000
chr10	110355000	110360000	chr10	110500000	110505000	.	.	.	.	255255	718	219.112	285.473	348.357	364.101	0	0	4.99e-42	4.739e-42	7	110355357	110500357	8360
chr10	88400000	88405000	chr10	88550000	88555000	.	.	.	.	255255	281	139.788	115.102	130.429	138.606	1.31445e-15	6.95886e-29	2.03383e-15	2.0687e-15	13	88400192	88550961	13657
chr10	111755000	111760000	chr10	112310000	112315000	.	.	.	.	255255	97	38.3107	36.6161	39.1751	41.4872	5.77388e-11	7.2646e-11	3.57236e-06	3.80591e-06	2	111760000	112312500	2500
chr10	7530000	7535000	chr10	9300000	9305000	.	.	.	.	255255	118	43.5407	31.0514	34.9852	42.9102	9.0143e-13	1.74042e-19	2.27658e-19	1.36798e-12	10	7529000	9302500	9862
chr10	62590000	62595000	chr10	63000000	63005000	.	.	.	.	255255	207	90.2139	105.655	133.32	113.616	1.35923e-17	1.06336e-08	0.00998518	1.33734e-08	5	62605500	63003500	13038
chr10	92245000	92250000	chr10	92280000	92285000	.	.	.	.	255255	336	167.616	181.038	171.173	199.787	1.00703e-15	1.28458e-15	1.59986e-15	4.0038e-05	6	92228333	92285000	19329
chr10	132220000	132225000	chr10	132450000	132455000	.	.	.	.	255255	224	63.1719	62.7912	74.63	69.6847	7.10699e-36	6.61853e-36	1.14444e-35	1.20057e-35	8	132223750	132448125	12578
chr10	18530000	18540000	chr10	18590000	18600000	.	.	.	.	255255	721	329.955	343.869	274.093	263.965	5.13e-43	5.04e-43	0	0	2	18530000	18595000	5000
chr10	119210000	119215000	chr10	119305000	119310000	.	.	.	.	255255	585	270.44	262.943	345.677	300.505	3.41783e-37	4.31519e-37	3.76003e-15	4.78541e-37	10	119209500	119303500	16279
chr10	96015000	96020000	chr10	96340000	96345000	.	.	.	.	255255	299	133.666	109.144	148.915	113.523	4.38689e-20	3.42387e-35	6.68323e-20	5.85674e-35	5	96017500	96340500	9434
chr10	117490000	117500000	chr10	118420000	118430000	.	.	.	.	255255	276	111.27	124.281	159.861	129.028	8.88476e-27	5.93631e-14	6.43689e-05	8.32859e-14	1	117495000	118425000	0
chr10	45955000	45960000	chr10	49925000	49930000	.	.	.	.	255255	23	0.289322	0.38376	0.282669	0.434614	3.59628e-15	1.55673e-14	8.48937e-15	7.60135e-15	1	45957500	49927500	0
chr10	101095000	101100000	chr10	101140000	101145000	.	.	.	.	255255	623	206.035	207.17	198.022	240.327	0	0	0	0	11	101095227	101141590	13369
chr10	26335000	26340000	chr10	26430000	26435000	.	.	.	.	255255	571	289.091	257.177	283.651	293.411	1.07538e-33	1.36203e-33	1.55581e-33	1.55257e-33	10	26347500	26435500	26907
chr10	101470000	101475000	chr10	101570000	101575000	.	.	.	.	255255	162	89.9789	80.2532	85.128	95.3678	2.02593e-06	2.60823e-06	3.0589e-06	3.11216e-06	1	101472500	101572500	0
chr10	6040000	6045000	chr10	6460000	6465000	.	.	.	.	255255	120	54.7784	54.4463	51.3364	46.5127	9.57121e-08	1.17942e-07	1.4167e-07	2.67314e-13	1	6042500	6462500	0
chr10	27735000	27740000	chr10	28240000	28245000	.	.	.	.	255255	131	62.2736	57.829	65.5519	63.7356	1.98866e-05	9.80145e-11	2.92816e-05	2.96824e-05	3	27740833	28244166	3728
chr10	101050000	101055000	chr10	101140000	101145000	.	.	.	.	255255	266	115.496	108.773	94.6814	158.024	5.06314e-24	5.1453e-24	1.54019e-38	0.000554143	5	101044500	101141500	8062
chr10	114300000	114305000	chr10	114695000	114700000	.	.	.	.	255255	217	80.6458	86.7981	99.1213	87.2247	1.05065e-20	1.06519e-20	1.02919e-10	1.66973e-20	5	114302500	114698500	6403
chr10	13095000	13100000	chr10	13300000	13305000	.	.	.	.	255255	122	55.2395	50.1395	51.8195	56.6382	2.88232e-08	3.49194e-08	4.2564e-08	4.47983e-08	2	13100000	13300000	3536
chr10	102730000	102735000	chr10	102900000	102905000	.	.	.	.	255255	280	118.957	98.8726	121.71	114.19	1.55761e-28	1.5063e-28	2.39529e-28	2.44629e-28	15	102732166	102900166	12337
chr10	35115000	35120000	chr10	35565000	35570000	.	.	.	.	255255	147	53.5919	61.7238	92.9712	63.5564	5.65201e-16	6.60036e-09	0.00105516	8.27632e-09	9	35115833	35561944	18864
chr10	26625000	26630000	chr10	27320000	27325000	.	.	.	.	255255	85	19.0844	20.1391	28.4333	18.6849	1.484e-22	2.09223e-16	3.81928e-11	3.67414e-22	4	26626250	27325000	8385
chr10	109880000	109885000	chr10	110220000	110225000	.	.	.	.	255255	208	117.802	98.6643	123.575	100.084	5.37262e-09	6.68197e-09	0.00789022	8.43342e-09	2	109885000	110220000	3536
chr10	4930000	4935000	chr10	5025000	5030000	.	.	.	.	255255	110	58.5303	51.1552	51.9413	50.0735	2.22982e-05	2.93936e-05	3.29865e-05	3.4501e-05	1	4932500	5027500	0
chr10	102225000	102230000	chr10	102395000	102400000	.	.	.	.	255255	530	248.8	246.814	352.297	221.465	2.56046e-24	3.38069e-24	9.41294e-08	0	3	102230833	102402500	6009
chr10	42550000	42555000	chr10	42780000	42785000	.	.	.	.	255255	176	67.5736	66.1524	73.2504	71.5539	2.18686e-17	2.26784e-17	3.20034e-17	3.29158e-17	4	42548750	42785000	13975
chr10	104300000	104305000	chr10	104345000	104350000	.	.	.	.	255255	1115	370.479	407.928	462.431	596.309	0	0	0	0	22	104296136	104349545	18869
chr10	14660000	14665000	chr10	14820000	14825000	.	.	.	.	255255	269	107.335	108.413	97.7323	134.509	5.80268e-25	5.83239e-25	9.07924e-25	1.05693e-12	8	14661250	14823750	8839
chr10	73895000	73900000	chr10	74225000	74230000	.	.	.	.	255255	114	54.1296	56.9918	63.1082	65.5689	2.82099e-06	3.61053e-06	0.0177004	0.0179629	3	73890833	74232500	8334
chr10	19815000	19820000	chr10	20855000	20860000	.	.	.	.	255255	48	20.3139	20.4369	21.9426	20.1779	0.0149303	0.0261104	0.0234997	0.0237303	3	19817500	20855833	6009
chr10	29495000	29500000	chr10	30685000	30690000	.	.	.	.	255255	37	2.84008	2.01181	1.73103	1.59642	1.39189e-21	3.87463e-24	3.28811e-27	2.80668e-27	2	29495000	30687500	2500
chr10	68735000	68740000	chr10	68780000	68785000	.	.	.	.	255255	379	189.61	189.371	247.003	208.646	4.69551e-26	5.44877e-26	0.0216907	3.49229e-11	8	68736875	68777500	13707
chr10	101210000	101215000	chr10	101440000	101445000	.	.	.	.	255255	204	53.3659	67.2469	80.757	83.6395	2.93447e-40	1.42797e-27	1.64598e-16	1.66083e-16	3	101214166	101444166	3727
chr10	106790000	106800000	chr10	108780000	108790000	.	.	.	.	255255	125	62.3218	67.5668	70.3262	73.6308	0.000541708	0.00109421	0.00119116	0.0011766	1	106795000	108785000	0
chr10	62590000	62595000	chr10	63080000	63085000	.	.	.	.	255255	280	69.0566	91.5446	114.705	121.683	0	0	2.39529e-28	2.44629e-28	17	62595147	63082794	23131
chr10	14605000	14610000	chr10	14950000	14955000	.	.	.	.	255255	138	55.4208	68.1384	61.6393	83.6365	5.8604e-13	8.83489e-07	1.03676e-06	0.0168807	2	14605000	14957500	5590
chr10	15210000	15215000	chr10	15365000	15370000	.	.	.	.	255255	155	62.0036	61.7355	68.2422	69.084	4.59176e-11	5.2629e-11	6.78261e-11	6.93216e-11	1	15212500	15367500	0
chr10	44960000	44970000	chr10	48670000	48680000	.	.	.	.	255255	39	11.5004	10.8867	13.4435	10.2436	1.21026e-05	4.43444e-05	0.00471182	4.12925e-05	1	44965000	48675000	0
chr10	75185000	75190000	chr10	75225000	75230000	.	.	.	.	255255	431	192.972	183.004	220.179	258.445	1.59146e-21	2.2617e-41	2.58131e-21	2.2611e-07	6	75188333	75231666	5893
chr10	102835000	102840000	chr10	103330000	103335000	.	.	.	.	255255	111	55.34	50.9211	60.3187	48.8214	1.3518e-05	1.76627e-05	1.99594e-05	3.14245e-10	2	102837500	103335000	2500
chr10	110900000	110905000	chr10	111200000	111205000	.	.	.	.	255255	92	36.636	37.5548	44.633	41.067	3.29262e-09	4.19704e-09	6.08339e-05	6.50134e-05	2	110897500	111205000	5590
chr10	35235000	35240000	chr10	36880000	36885000	.	.	.	.	255255	47	18.4766	13.3951	14.451	20.9126	0.000403267	2.91236e-06	2.92272e-06	0.0373465	2	35240000	36877500	5590
chr10	88560000	88565000	chr10	88930000	88935000	.	.	.	.	255255	177	86.6233	65.4205	84.0832	65.7568	1.37843e-09	1.05439e-17	2.08373e-09	1.54285e-17	7	88568928	88929642	15336
chr10	106705000	106710000	chr10	107815000	107820000	.	.	.	.	255255	91	40.0376	38.2201	43.5108	44.3246	6.97515e-05	9.12861e-09	0.000103233	0.00011037	2	106702500	107820000	5590
chr10	21275000	21280000	chr10	21490000	21495000	.	.	.	.	255255	244	131.597	104.952	135.195	103.241	4.83302e-08	1.49784e-17	7.69111e-08	2.16336e-17	7	21283214	21490357	16304
chr10	128120000	128130000	chr10	131900000	131910000	.	.	.	.	255255	92	32.3113	32.787	32.41	40.4479	5.29438e-09	1.32526e-08	1.41589e-08	0.000186525	1	128125000	131905000	0
chr10	103890000	103895000	chr10	104120000	104125000	.	.	.	.	255255	380	160.017	157.983	215.37	176.712	2.53972e-26	2.94451e-26	2.44834e-11	4.03331e-26	8	103893125	104126875	15026
chr10	27445000	27450000	chr10	28240000	28245000	.	.	.	.	255255	75	32.208	32.1532	33.9481	37.0395	0.000266148	0.000395584	0.000412976	0.000422453	2	27447500	28245000	2500
chr10	32790000	32795000	chr10	33155000	33160000	.	.	.	.	255255	137	46.2237	43.9807	57.6877	48.3901	4.31967e-20	4.51089e-20	1.80507e-12	6.27573e-20	5	32796500	33155500	6325
chr10	95425000	95430000	chr10	95600000	95605000	.	.	.	.	255255	507	202.435	192.38	204.895	241.893	3.2933e-41	0	4.969e-41	4.7847e-41	10	95432500	95600000	15207
chr10	90910000	90915000	chr10	91160000	91165000	.	.	.	.	255255	149	68.6994	75.0535	93.5201	72.7472	1.74313e-09	2.06109e-09	0.000530104	2.60326e-09	1	90912500	91162500	0
chr10	11270000	11275000	chr10	11470000	11475000	.	.	.	.	255255	110	45.5106	41.5997	39.1515	47.2267	4.26843e-10	5.01115e-10	6.13735e-10	6.53864e-10	1	11272500	11472500	0
chr10	130185000	130190000	chr10	132020000	132025000	.	.	.	.	255255	70	26.8174	28.3754	35.4939	27.5543	5.44249e-06	8.05399e-06	0.00499756	8.74334e-06	2	130190000	132025000	3536
chr10	79245000	79250000	chr10	80470000	80475000	.	.	.	.	255255	47	18.1379	14.4339	15.6323	18.3555	0.000403267	2.91236e-06	0.000653737	0.000675832	1	79247500	80472500	0
chr10	48655000	48660000	chr10	48800000	48805000	.	.	.	.	255255	186	73.4753	65.9522	90.2553	78.9466	8.39556e-21	8.41885e-21	1.38944e-11	1.42232e-11	5	48662500	48807500	15811
chr10	30785000	30790000	chr10	31485000	31490000	.	.	.	.	255255	171	47.0189	71.3687	75.3221	83.4889	4.79447e-36	9.48321e-16	1.30567e-15	4.63944e-08	4	30785000	31490000	3536
chr10	13785000	13790000	chr10	14185000	14190000	.	.	.	.	255255	187	93.6672	70.8127	83.1749	91.1737	5.10573e-12	3.70189e-21	7.7395e-12	7.92188e-12	5	13789500	14185500	8544
chr10	29235000	29240000	chr10	29305000	29310000	.	.	.	.	255255	283	122.944	114.142	127.216	103.873	4.4257e-16	1.46383e-29	6.83909e-16	2.40645e-29	6	29239166	29303333	6719
chr10	23310000	23315000	chr10	23700000	23705000	.	.	.	.	255255	214	29.2028	32.7539	40.9367	42.847	0	0	0	0	12	23313333	23701250	16271
chr10	60815000	60820000	chr10	61730000	61735000	.	.	.	.	255255	98	29.0351	25.0134	29.0001	25.3908	4.83708e-17	6.85215e-17	8.18436e-17	8.50271e-17	5	60813500	61734500	10000
chr10	77250000	77255000	chr10	77640000	77645000	.	.	.	.	255255	362	145.136	155.443	158.452	189.613	2.32468e-39	1.27259e-21	1.64058e-21	1.71532e-21	8	77251250	77643125	11267
chr10	8035000	8040000	chr10	9210000	9215000	.	.	.	.	255255	118	44.1492	43.2507	51.0624	57.1548	9.0143e-13	1.0096e-12	4.5336e-07	4.77265e-07	7	8042500	9206785	11518
chr10	13370000	13380000	chr10	13580000	13590000	.	.	.	.	255255	601	336.133	266.828	395.121	257.099	8.24481e-18	2.8767e-41	0.00163976	4.706e-41	1	13375000	13585000	0
chr10	95130000	95135000	chr10	95360000	95365000	.	.	.	.	255255	529	151.773	147.891	170.9	193.743	0	0	0	0	9	95133611	95362500	10730
chr10	132380000	132385000	chr10	132630000	132635000	.	.	.	.	255255	122	44.5316	50.0391	53.4647	61.7895	3.3012e-14	3.49194e-08	4.2564e-08	0.00120513	5	132384500	132636500	6325
chr10	75400000	75410000	chr10	75610000	75620000	.	.	.	.	255255	274	128.493	132.852	155.369	130.224	1.23731e-13	1.68556e-13	0.000114258	2.33557e-13	2	75405000	75620000	5000
chr10	88840000	88845000	chr10	89215000	89220000	.	.	.	.	255255	216	84.1645	86.6515	104.616	107.817	2.20022e-20	2.23863e-20	1.70427e-10	1.73525e-10	20	88836750	89212500	15019
chr10	123390000	123400000	chr10	124220000	124230000	.	.	.	.	255255	82	32.8016	38.105	40.8146	36.8259	7.40711e-06	1.6609e-05	0.0189405	1.69339e-05	1	123395000	124225000	0
chr10	5975000	5980000	chr10	6045000	6050000	.	.	.	.	255255	179	89.275	97.2093	103.28	106.786	4.70868e-10	0.000621098	0.000694119	0.00071176	1	5977500	6047500	0
chr10	101835000	101840000	chr10	102010000	102015000	.	.	.	.	255255	719	268.177	254.499	337.065	329.982	0	0	2.531e-42	2.41e-42	4	101840000	102010000	3536
chr10	103890000	103895000	chr10	104200000	104205000	.	.	.	.	255255	263	104.001	131.992	161.917	138.004	4.28146e-23	1.51495e-11	0.00115232	1.94665e-11	10	103889500	104209000	9014
chr10	123155000	123160000	chr10	123380000	123385000	.	.	.	.	255255	392	181.403	221.843	238.03	259.673	1.30721e-29	1.58199e-13	1.97915e-13	0.00230371	20	123146500	123390500	20248
chr10	6425000	6430000	chr10	6680000	6685000	.	.	.	.	255255	328	178.567	145.735	190.284	156.894	4.64912e-14	2.79612e-28	7.46819e-14	7.83192e-14	21	6423690	6672261	17192
chr10	103365000	103370000	chr10	103400000	103405000	.	.	.	.	255255	274	133.384	140.963	163.112	122.534	5.32123e-14	6.36827e-14	6.13526e-05	8.42159e-14	2	103365000	103402500	2500
chr10	30430000	30440000	chr10	32320000	32330000	.	.	.	.	255255	99	52.7907	47.6065	52.4474	44.8319	0.00552723	3.3251e-06	0.0123024	3.3653e-06	1	30435000	32325000	0
chr10	95695000	95700000	chr10	95740000	95745000	.	.	.	.	255255	608	298.805	297.748	352.244	361.591	0	0	6.31325e-19	6.16802e-19	11	95700227	95746136	12349
chr10	88490000	88500000	chr10	89460000	89470000	.	.	.	.	255255	71	30.5679	31.6311	33.962	30.3436	3.74451e-06	0.00819574	0.00810641	9.17384e-06	1	88495000	89465000	0
chr10	26890000	26895000	chr10	27355000	27360000	.	.	.	.	255255	249	15.6884	14.8595	16.7288	17.1374	0	0	0	0	4	26890000	27360000	3536
chr10	4845000	4850000	chr10	5385000	5390000	.	.	.	.	255255	160	53.8014	58.2143	69.0609	71.5529	9.16188e-21	9.22421e-21	2.71626e-12	2.78759e-12	7	4849642	5383928	7987
chr10	117550000	117560000	chr10	117680000	117690000	.	.	.	.	255255	729	354.58	410.507	474.823	478.821	0	6.54379e-18	8.45282e-18	8.69026e-18	3	117545000	117685000	10000
chr10	78045000	78050000	chr10	79075000	79080000	.	.	.	.	255255	116	53.633	53.2888	71.9934	46.6151	9.46687e-07	1.19798e-06	0.00952368	6.79382e-12	1	78047500	79077500	0
chr10	96015000	96020000	chr10	96300000	96305000	.	.	.	.	255255	256	109.389	123.88	168.95	132.999	5.43023e-21	3.86673e-10	0.00589102	4.88996e-10	4	96018750	96297500	5154
chr10	31030000	31035000	chr10	31385000	31390000	.	.	.	.	255255	114	44.8725	53.7696	66.3831	50.4279	2.11683e-11	3.61053e-06	0.0177004	4.38673e-06	1	31032500	31387500	0
chr10	88935000	88940000	chr10	88980000	88985000	.	.	.	.	255255	547	246.862	236.045	272.125	249.4	4.82742e-28	0	7.12502e-28	7.16893e-28	11	88937500	88984772	10255
chr10	36935000	36940000	chr10	36970000	36975000	.	.	.	.	255255	163	71.5576	83.5936	67.8088	95.8256	2.4741e-13	1.66479e-06	3.6261e-13	2.00049e-06	1	36937500	36972500	0
chr10	71320000	71325000	chr10	71375000	71380000	.	.	.	.	255255	562	238.395	253.469	327.604	319.589	0	2.04734e-31	8.97067e-12	8.781e-12	18	71321388	71373888	16426
chr10	58950000	58955000	chr10	59290000	59295000	.	.	.	.	255255	148	49.8713	59.5314	80.7631	56.656	2.51697e-16	2.6573e-16	0.000750539	3.99517e-16	2	58952500	59290000	2500
chr10	32005000	32010000	chr10	32045000	32050000	.	.	.	.	255255	310	157.132	153.409	197.196	173.495	1.24645e-10	1.6795e-10	0.0135991	2.11493e-10	2	32007500	32045000	2500
chr10	100555000	100560000	chr10	100740000	100745000	.	.	.	.	255255	234	122.315	113.604	133.802	124.844	2.10673e-06	6.81325e-15	3.3712e-06	3.44154e-06	6	100560000	100738333	13176
chr10	114550000	114555000	chr10	114695000	114700000	.	.	.	.	255255	460	158.535	147.387	173.225	174.753	0	0	0	0	16	114553125	114697500	11743
chr10	52740000	52745000	chr10	52780000	52785000	.	.	.	.	255255	582	269.532	249.796	285.804	246.259	1.98212e-36	2.48079e-36	2.78477e-36	2.77107e-36	5	52739500	52781500	6325
chr10	91385000	91390000	chr10	91915000	91920000	.	.	.	.	255255	174	61.7877	49.3873	55.8829	79.8247	9.8227e-17	1.83817e-26	3.00869e-26	1.01725e-08	10	91393500	91912000	19780
chr10	58775000	58780000	chr10	59235000	59240000	.	.	.	.	255255	115	56.3341	54.6739	59.0108	57.2428	1.63807e-06	2.08893e-06	2.42306e-06	2.56097e-06	2	58780000	59237500	2500
chr10	60440000	60445000	chr10	60645000	60650000	.	.	.	.	255255	382	112.098	103.656	109.205	119.106	0	0	0	0	13	60448269	60648269	15230
chr10	36890000	36900000	chr10	37940000	37950000	.	.	.	.	255255	86	40.3644	36.5501	43.4315	40.2689	0.00158253	1.13952e-06	0.00354548	0.00353963	1	36895000	37945000	0
chr10	88110000	88120000	chr10	88390000	88400000	.	.	.	.	255255	762	356.326	345.486	327.84	494.129	0	0	0	0.00010002	5	88117000	88391000	18974
chr10	114470000	114475000	chr10	115120000	115125000	.	.	.	.	255255	96	42.9762	43.4412	46.4925	53.3	4.39284e-06	5.74153e-06	6.44438e-06	0.0125858	6	114472500	115124166	19003
chr10	23315000	23320000	chr10	23525000	23530000	.	.	.	.	255255	571	143.37	131.148	178.754	160.63	0	0	0	0	26	23318076	23525961	21590
chr10	97570000	97575000	chr10	97730000	97735000	.	.	.	.	255255	149	51.2146	47.9678	58.7942	53.0832	1.12105e-16	2.51489e-25	1.66244e-16	1.77325e-16	3	97572500	97732500	5000
chr10	106705000	106710000	chr10	106980000	106985000	.	.	.	.	255255	318	100.025	110.524	133.15	128.801	1.414e-42	1.256e-42	3.77579e-25	3.8472e-25	9	106711388	106982500	11112
chr10	95130000	95135000	chr10	95240000	95245000	.	.	.	.	255255	335	129.947	111.643	124.075	111.548	1.88586e-30	0	2.84881e-30	0	6	95132500	95240833	8333
chr10	37825000	37830000	chr10	37875000	37880000	.	.	.	.	255255	160	61.35	66.4555	71.6695	67.5132	9.16188e-21	2.07215e-12	2.71626e-12	2.78759e-12	2	37820000	37877500	7500
chr10	77170000	77175000	chr10	77390000	77395000	.	.	.	.	255255	160	73.2801	70.4885	88.6427	68.4027	1.84136e-12	2.07215e-12	7.27055e-06	2.78759e-12	4	77170000	77390000	3536
chr10	119745000	119750000	chr10	120330000	120335000	.	.	.	.	255255	70	26.8638	24.9525	27.214	32.2752	5.44249e-06	8.05399e-06	8.51356e-06	0.00510681	8	119755625	120335625	17700
chr10	88110000	88115000	chr10	88550000	88555000	.	.	.	.	255255	173	85.2336	77.7904	70.2106	110.893	1.10379e-08	1.34248e-08	3.01518e-16	0.00418531	1	88112500	88552500	0
chr10	45250000	45255000	chr10	45735000	45740000	.	.	.	.	255255	48	10.4049	9.68715	13.7976	9.5378	3.69933e-10	4.58294e-13	1.09768e-06	4.93141e-13	3	45249166	45735833	3728
chr10	91005000	91010000	chr10	91085000	91090000	.	.	.	.	255255	331	130.747	131.693	139.077	144.363	3.27578e-29	3.37891e-29	4.96023e-29	5.10153e-29	6	91010833	91093333	11335
chr10	11530000	11535000	chr10	11600000	11605000	.	.	.	.	255255	778	368.361	378.362	473.212	411.184	0	0	6.14441e-26	7.23666e-26	29	11533017	11599568	44839
chr10	97790000	97795000	chr10	97865000	97870000	.	.	.	.	255255	396	144.042	144.65	163.207	166.385	0	0	1.42843e-30	1.51877e-30	10	97793000	97870000	19144
chr10	89215000	89220000	chr10	89565000	89570000	.	.	.	.	255255	168	86.2175	70.3143	66.6415	96.7798	1.29763e-07	8.3131e-15	1.13469e-14	1.99535e-07	4	89218750	89562500	5154
chr10	21075000	21080000	chr10	21945000	21950000	.	.	.	.	255255	57	21.8059	23.9089	27.1069	23.8358	6.99398e-05	0.000113268	0.0170527	0.00011514	2	21077500	21950000	2500
chr10	112565000	112570000	chr10	113380000	113385000	.	.	.	.	255255	99	36.7175	36.6532	38.5289	44.7766	1.06585e-11	1.32646e-11	1.65447e-11	1.12504e-06	4	112566250	113386250	6374
chr10	92100000	92105000	chr10	92210000	92215000	.	.	.	.	255255	233	112.697	124.693	152.217	119.639	1.08454e-14	4.0421e-06	4.7942e-06	1.68581e-14	3	92099166	92217500	10138
chr10	107520000	107530000	chr10	109640000	109650000	.	.	.	.	255255	78	36.3503	36.1294	37.2859	35.2959	8.92457e-05	0.000198387	0.000195237	0.000196083	1	107525000	109645000	0
chr10	110500000	110505000	chr10	110545000	110550000	.	.	.	.	255255	828	406.397	385.083	479.618	360.027	1.76117e-35	1.87561e-35	1.4029e-35	0	6	110501666	110541666	5893
chr10	31860000	31865000	chr10	31995000	32000000	.	.	.	.	255255	354	124.5	146.018	181.583	169.114	1.2725e-36	1.26502e-36	1.40762e-19	1.47165e-19	20	31858250	32005750	15847
chr10	29375000	29380000	chr10	29495000	29500000	.	.	.	.	255255	148	47.6523	43.2793	54.878	43.8001	6.83622e-25	7.1248e-25	3.74025e-16	1.01218e-24	7	29381071	29500357	13740
chr10	39155000	39160000	chr10	39235000	39240000	.	.	.	.	255255	264	121.32	139.742	132.443	161.337	2.10613e-23	9.37391e-12	1.19504e-11	0.000919496	6	39145000	39247500	37165
chr10	30685000	30690000	chr10	31810000	31815000	.	.	.	.	255255	114	53.9159	42.6754	39.7579	59.8939	2.82099e-06	2.42981e-11	3.02526e-11	4.38673e-06	1	30687500	31812500	0
chr10	96090000	96095000	chr10	96125000	96130000	.	.	.	.	255255	705	219.258	237.715	281.595	179.53	0	0	0	0	4	96090000	96130000	3536
chr10	110410000	110415000	chr10	110545000	110550000	.	.	.	.	255255	649	263.108	269.365	275.45	327.319	0	0	0	1.34197e-26	2	110415000	110547500	2500
chr10	39060000	39065000	chr10	39290000	39295000	.	.	.	.	255255	156	71.7589	85.8045	91.7427	86.9183	2.44449e-11	3.34028e-05	3.79718e-05	3.86715e-05	1	39062500	39292500	0
chr10	107410000	107415000	chr10	107650000	107655000	.	.	.	.	255255	153	68.765	79.3738	91.8154	88.0012	1.58432e-10	0.000109141	0.000122301	0.000124275	2	107417500	107650000	5590
chr10	3780000	3785000	chr10	4125000	4130000	.	.	.	.	255255	176	76.9139	85.9037	89.2791	105.976	2.18686e-17	2.80453e-09	3.54131e-09	0.00177121	3	3784166	4129166	3727
chr10	62590000	62595000	chr10	63155000	63160000	.	.	.	.	255255	357	116.462	102.943	124.088	143.057	0	0	1.87914e-37	1.93142e-37	17	62599852	63156029	15398
chr10	6010000	6015000	chr10	6400000	6405000	.	.	.	.	255255	77	28.4222	29.155	26.8366	42.4826	2.5918e-08	3.65486e-08	3.99995e-08	0.0440285	2	6012500	6405000	2500
chr10	62495000	62500000	chr10	63715000	63720000	.	.	.	.	255255	125	53.6471	61.4164	54.9938	76.1197	4.46084e-09	0.000345236	6.60977e-09	0.000378976	1	62497500	63717500	0
chr10	128270000	128275000	chr10	128525000	128530000	.	.	.	.	255255	136	64.3536	68.9729	71.5151	75.3721	1.88754e-06	2.41621e-06	2.79833e-06	2.82694e-06	4	128266250	128530000	6731
chr10	89795000	89800000	chr10	90590000	90595000	.	.	.	.	255255	134	49.4061	47.5532	61.7822	53.7629	1.0576e-11	7.90548e-19	7.31468e-06	1.69198e-11	6	89795833	90591666	6719
chr10	84540000	84545000	chr10	84665000	84670000	.	.	.	.	255255	119	64.7718	58.7957	70.3765	63.1991	0.00241991	2.13288e-07	0.00349654	0.00355213	1	84542500	84667500	0
chr10	95245000	95250000	chr10	95360000	95365000	.	.	.	.	255255	790	207.51	200.026	212.457	340.215	0	0	0	0	10	95249000	95361000	13583
chr10	5440000	5445000	chr10	5620000	5625000	.	.	.	.	255255	633	121.906	107.927	135.673	129.14	0	0	0	0	20	5445250	5620500	24931
chr10	70540000	70550000	chr10	71200000	71210000	.	.	.	.	255255	176	83.0338	91.8768	103.982	91.8374	6.0076e-09	1.01529e-08	0.0043707	1.2461e-08	1	70545000	71205000	0
chr10	71315000	71320000	chr10	71895000	71900000	.	.	.	.	255255	113	50.2593	44.935	54.4132	46.3887	4.8059e-06	5.23961e-11	7.11132e-06	6.99546e-11	5	71314500	71893500	8062
chr10	52640000	52645000	chr10	52780000	52785000	.	.	.	.	255255	220	81.5506	69.8248	89.239	75.3791	1.11389e-21	3.57935e-34	1.74745e-21	6.29638e-34	8	52643125	52783125	7126
chr10	127900000	127905000	chr10	128070000	128075000	.	.	.	.	255255	188	77.9071	79.6155	82.7478	96.3997	2.82809e-12	3.21485e-12	4.28191e-12	4.38446e-12	9	127906944	128069722	10915
chr10	15880000	15885000	chr10	17250000	17255000	.	.	.	.	255255	59	20.2474	25.9165	26.1166	28.3062	1.60905e-05	0.00693672	0.00666013	0.00679089	4	15887500	17256250	11792
chr10	42325000	42330000	chr10	42360000	42365000	.	.	.	.	255255	84	41.724	46.9762	44.3672	45.7453	0.0019742	0.00292169	0.00296378	0.00309233	1	42327500	42362500	0
chr10	80850000	80860000	chr10	81170000	81180000	.	.	.	.	255255	335	164.149	177.074	180.549	205.742	3.43184e-15	4.27668e-15	5.8708e-15	8.26518e-05	2	80855000	81180000	5000
chr10	45250000	45255000	chr10	45595000	45600000	.	.	.	.	255255	121	54.7238	52.008	72.7391	40.8386	5.28545e-08	6.44395e-08	0.00171739	1.16242e-13	2	45252500	45590000	7500
chr10	102830000	102835000	chr10	103490000	103495000	.	.	.	.	255255	151	72.0892	63.776	68.5126	72.6995	5.33419e-10	6.252e-10	7.91114e-10	7.99711e-10	3	102835833	103487500	6009
chr10	104290000	104295000	chr10	104620000	104625000	.	.	.	.	255255	88	40.9397	34.3187	47.4901	34.8789	0.000315882	8.73523e-08	0.00047259	1.05514e-07	2	104290000	104620000	3536
chr10	9330000	9335000	chr10	11470000	11475000	.	.	.	.	255255	40	7.86774	7.08211	10.4338	7.23142	1.0358e-08	5.38899e-11	1.14927e-05	6.22108e-11	2	9332500	11470000	2500
chr10	63870000	63875000	chr10	66930000	66935000	.	.	.	.	255255	30	8.36183	7.61365	7.22247	8.50449	0.00111218	6.26379e-05	6.03093e-05	0.00237736	1	63872500	66932500	0
chr10	38450000	38455000	chr10	38485000	38490000	.	.	.	.	255255	59	12.4609	17.9874	14.5519	28.5045	1.54772e-12	1.88724e-08	4.84503e-12	0.00679089	1	38452500	38487500	0
chr10	87530000	87535000	chr10	87730000	87735000	.	.	.	.	255255	298	123.023	129.472	156.001	136.838	8.01256e-20	8.93262e-20	2.23817e-08	1.24279e-19	6	87528333	87733333	21634
chr10	101270000	101275000	chr10	101440000	101445000	.	.	.	.	255255	211	73.2985	77.6483	71.9535	114.686	2.24233e-30	8.51925e-19	3.49156e-30	2.03932e-09	1	101272500	101442500	0
chr10	49595000	49600000	chr10	49915000	49920000	.	.	.	.	255255	65	20.152	21.6357	26.2251	23.0124	1.19477e-07	1.88203e-07	0.000235634	2.00585e-07	2	49595000	49920000	3536
chr10	43670000	43675000	chr10	44310000	44315000	.	.	.	.	255255	146	59.1634	60.4662	80.1733	59.7691	1.25514e-15	1.34084e-15	0.00147183	2.00014e-15	1	43672500	44312500	0
chr10	95690000	95695000	chr10	95840000	95845000	.	.	.	.	255255	843	190.818	219.382	333.547	232.487	0	0	0	0	25	95691500	95852700	21072
chr10	6915000	6920000	chr10	7415000	7420000	.	.	.	.	255255	226	61.6472	64.6682	88.5008	78.0236	9.48575e-37	8.84249e-37	1.73225e-23	1.7622e-23	17	6921029	7414558	13952
chr10	61135000	61140000	chr10	61285000	61290000	.	.	.	.	255255	208	87.4595	77.9929	77.1131	77.9762	6.80826e-18	7.13095e-18	5.73693e-29	1.07091e-17	11	61144772	61281590	26052
chr10	13370000	13375000	chr10	13775000	13780000	.	.	.	.	255255	101	27.8899	35.3029	38.1833	40.775	1.77111e-18	2.34944e-12	2.89072e-12	3.23394e-07	1	13372500	13777500	0
chr10	68550000	68555000	chr10	68720000	68725000	.	.	.	.	255255	216	99.5094	101.522	115.062	115.552	1.10845e-10	1.33916e-10	1.70427e-10	1.73525e-10	8	68547500	68728125	16020
chr10	68215000	68220000	chr10	68890000	68895000	.	.	.	.	255255	70	36.2357	33.4391	36.3006	37.6021	0.00324621	0.00501819	0.00499756	0.00510681	2	68217500	68895000	2500
chr10	123395000	123400000	chr10	123835000	123840000	.	.	.	.	255255	66	21.3714	24.8691	24.2172	25.6929	4.92916e-08	0.000123186	8.42182e-08	0.000130987	4	123396250	123843750	7289
chr10	89030000	89035000	chr10	89210000	89215000	.	.	.	.	255255	775	165.304	161.881	183.999	239.964	0	0	0	0	22	89029772	89210681	18323
chr10	39220000	39230000	chr10	39280000	39290000	.	.	.	.	255255	565	231.769	299.264	360.44	333.229	0	4.38033e-32	4.41131e-12	4.50739e-12	1	39225000	39285000	0
chr10	61895000	61900000	chr10	62035000	62040000	.	.	.	.	255255	776	345.426	292.753	453.085	283.265	0	0	1.41068e-25	0	9	61901388	62041944	10614
chr10	12210000	12215000	chr10	12900000	12905000	.	.	.	.	255255	137	58.0765	52.5923	53.5957	73.5597	1.22627e-12	1.35588e-12	1.80507e-12	1.7246e-06	1	12212500	12902500	0
chr10	80535000	80540000	chr10	81030000	81035000	.	.	.	.	255255	68	23.8841	22.6113	22.6625	23.8185	7.89466e-09	1.25455e-08	1.4219e-08	1.3683e-08	1	80537500	81032500	0
chr10	34220000	34230000	chr10	34630000	34640000	.	.	.	.	255255	331	182.396	164.195	161.349	220.297	2.37144e-14	2.97201e-14	4.02446e-14	0.000226896	1	34225000	34635000	0
chr10	102225000	102230000	chr10	102350000	102355000	.	.	.	.	255255	1097	338.897	358.672	410.448	399.44	0	0	0	0	21	102234404	102347023	34628
chr10	39275000	39280000	chr10	39310000	39315000	.	.	.	.	255255	395	180.238	195.66	201.29	182.16	1.8556e-30	4.47502e-14	5.6027e-14	2.92301e-30	1	39277500	39312500	0
chr10	72050000	72055000	chr10	72215000	72220000	.	.	.	.	255255	200	99.2697	93.4802	104.9	110.205	1.89428e-07	1.66285e-15	2.90882e-07	2.98239e-07	8	72051250	72220000	12562
chr10	80445000	80450000	chr10	80505000	80510000	.	.	.	.	255255	1023	360.402	358.889	480.023	411.876	0	0	0	0	31	80448145	80505241	19876
chr10	63630000	63635000	chr10	63715000	63720000	.	.	.	.	255255	652	287.047	247.716	251.247	289.207	0	0	0	0	12	63639166	63708333	20700
chr10	123580000	123585000	chr10	123860000	123865000	.	.	.	.	255255	154	70.3436	75.442	93.4387	70.588	8.54668e-11	9.85682e-11	8.33791e-05	1.28774e-10	1	123582500	123862500	0
chr10	92085000	92090000	chr10	92570000	92575000	.	.	.	.	255255	152	63.3602	71.8046	84.3885	69.94	2.91768e-10	3.39692e-10	0.000178147	4.3822e-10	2	92090000	92572500	2500
chr10	35135000	35140000	chr10	35340000	35345000	.	.	.	.	255255	117	49.3723	65.558	57.4084	70.917	5.41128e-07	0.00666331	7.98252e-07	0.00698854	2	35130000	35340000	7906
chr10	69515000	69520000	chr10	69800000	69805000	.	.	.	.	255255	110	48.0133	47.6799	54.2451	46.9113	4.26843e-10	5.01115e-10	3.29865e-05	6.53864e-10	1	69517500	69802500	0
chr10	58175000	58180000	chr10	58515000	58520000	.	.	.	.	255255	133	56.0956	63.5949	69.706	64.4711	2.1338e-11	1.03021e-05	1.16968e-05	1.18594e-05	3	58177500	58525833	8333
chr10	48360000	48365000	chr10	48655000	48660000	.	.	.	.	255255	185	43.9502	40.8181	47.8889	40.5314	0	0	0	0	8	48361250	48651250	8839
chr10	87855000	87860000	chr10	88560000	88565000	.	.	.	.	255255	344	107.985	123.048	155.521	122.327	0	2.60308e-33	2.84985e-17	3.98629e-33	18	87854166	88554444	14564
chr10	500000	510000	chr10	1070000	1080000	.	.	.	.	255255	305	143.758	149.15	186.881	151.44	2.64091e-21	3.37041e-21	3.17219e-09	5.10252e-21	2	510000	1075000	5000
chr10	7865000	7870000	chr10	9205000	9210000	.	.	.	.	255255	269	67.6363	63.9426	74.0222	90.361	0	0	0	8.84163e-40	16	7871875	9208750	12071
chr10	48210000	48215000	chr10	48285000	48290000	.	.	.	.	255255	579	187.509	186.469	211.763	219.564	0	0	0	0	19	48218026	48288552	16977
chr10	112470000	112480000	chr10	113510000	113520000	.	.	.	.	255255	181	89.7885	90.9469	117.919	91.4711	4.10515e-10	6.89792e-10	0.000964779	8.55171e-10	1	112475000	113515000	0
chr10	103795000	103800000	chr10	103845000	103850000	.	.	.	.	255255	260	121.024	134.515	144.602	154.776	3.48957e-22	6.2154e-11	7.83188e-11	0.00242412	3	103800833	103842500	10541
chr10	78045000	78050000	chr10	79190000	79195000	.	.	.	.	255255	213	63.6221	67.0357	84.0399	76.471	3.37343e-31	3.22145e-31	3.05251e-19	5.50897e-31	13	78048269	79198269	11570
chr10	74265000	74270000	chr10	74735000	74740000	.	.	.	.	255255	374	118.877	110.306	146.294	122.992	0	0	0	0	8	74266250	74736250	13807
chr10	21280000	21285000	chr10	21945000	21950000	.	.	.	.	255255	114	43.8197	47.1257	56.4719	51.123	2.11683e-11	2.42981e-11	4.17551e-06	4.38673e-06	6	21282500	21950833	10541
chr10	59865000	59870000	chr10	60205000	60210000	.	.	.	.	255255	97	32.7776	49.0027	52.2899	54.2178	5.77388e-11	0.00852902	0.00863599	0.00887288	3	59865833	60217500	10138
chr10	75390000	75395000	chr10	76035000	76040000	.	.	.	.	255255	125	56.9304	56.0985	64.6163	72.0612	4.46084e-09	5.32963e-09	0.000372747	0.000378976	8	75398750	76036875	9783
chr10	110305000	110310000	chr10	110670000	110675000	.	.	.	.	255255	160	63.6969	66.0107	87.6892	63.2231	1.84136e-12	2.07215e-12	7.27055e-06	2.78759e-12	4	110305000	110673750	9100
chr10	47020000	47030000	chr10	48460000	48470000	.	.	.	.	255255	90	38.2378	42.0118	48.2298	37.9021	2.55615e-08	0.000525393	0.000532874	6.44752e-08	1	47025000	48465000	0
chr10	91085000	91090000	chr10	91250000	91255000	.	.	.	.	255255	363	138.182	135.118	150.93	162.635	1.04485e-39	1.02922e-39	1.61597e-39	9.70747e-22	11	91091590	91246590	11651
chr10	3800000	3805000	chr10	4655000	4660000	.	.	.	.	255255	114	39.0385	41.3337	37.9365	69.7712	2.11683e-11	2.42981e-11	1.35843e-17	0.0179629	1	3802500	4657500	0
chr10	21490000	21495000	chr10	22990000	22995000	.	.	.	.	255255	85	31.322	34.6658	41.0014	40.3819	5.63443e-07	7.49249e-07	0.00191147	0.00199017	1	21492500	22992500	0
chr10	110135000	110140000	chr10	110280000	110285000	.	.	.	.	255255	588	153.453	125.072	156.489	156.48	0	0	0	0	21	110140357	110282738	15883
chr10	129035000	129040000	chr10	129970000	129975000	.	.	.	.	255255	138	49.135	50.2865	57.7049	52.1677	5.8604e-13	6.45527e-13	8.63801e-13	9.40234e-13	5	129034500	129971500	8062
chr10	70460000	70465000	chr10	70880000	70885000	.	.	.	.	255255	114	57.8007	54.1837	62.3787	62.4127	2.82099e-06	3.61053e-06	0.0177004	0.0179629	3	70464166	70884166	3727
chr10	60090000	60100000	chr10	60430000	60440000	.	.	.	.	255255	657	295.2	265.408	278.081	331.887	0	0	0	4.07231e-28	9	60108333	60438333	23571
chr10	121070000	121080000	chr10	121890000	121900000	.	.	.	.	255255	172	78.7929	83.8119	82.5281	105.708	4.60433e-08	7.85291e-08	9.36631e-08	0.0133333	1	121075000	121895000	0
chr10	101210000	101215000	chr10	101780000	101785000	.	.	.	.	255255	152	63.1718	51.385	62.8056	53.3538	2.91768e-10	9.62819e-18	4.31899e-10	1.49023e-17	6	101212500	101777500	11180
chr10	102645000	102650000	chr10	102680000	102685000	.	.	.	.	255255	382	189.883	217.63	229.421	210.529	7.38395e-27	9.07495e-12	1.12378e-11	1.09605e-11	1	102647500	102682500	0
chr10	60440000	60445000	chr10	60770000	60775000	.	.	.	.	255255	135	64.7449	55.2144	55.7207	61.347	3.06732e-06	5.81493e-12	7.69893e-12	8.29516e-12	5	60443500	60769500	6325
chr10	67855000	67860000	chr10	68205000	68210000	.	.	.	.	255255	275	100.04	91.2183	127.693	91.0089	6.91186e-27	0	4.92489e-14	0	5	67856500	68210500	6325
chr10	15430000	15435000	chr10	15820000	15825000	.	.	.	.	255255	106	39.8266	35.9361	45.697	38.0124	7.39853e-09	2.49698e-14	1.07069e-08	3.31823e-14	5	15437500	15825500	10198
chr10	41740000	41750000	chr10	41820000	41830000	.	.	.	.	255255	449	160.686	153.286	218.733	186.621	0	0	3.01324e-25	0	2	41745000	41830000	5000
chr10	125975000	125980000	chr10	126745000	126750000	.	.	.	.	255255	48	20.7472	19.9863	21.3957	23.0409	0.0149303	0.0261104	0.0234997	0.0237303	5	125981500	126748500	8485
chr10	84145000	84150000	chr10	84205000	84210000	.	.	.	.	255255	897	293.409	281.549	330.066	383.897	0	0	0	0	26	84153076	84204230	28746
chr10	31860000	31870000	chr10	32190000	32200000	.	.	.	.	255255	463	210.171	238.923	270.844	254.687	6.27975e-29	6.84475e-29	1.16776e-11	1.19817e-11	5	31859000	32199000	24739
chr10	86465000	86470000	chr10	86500000	86505000	.	.	.	.	255255	404	195.995	229.393	199.015	242.354	6.58076e-16	8.82876e-16	1.1104e-15	0.000198965	3	86457500	86502500	15000
chr10	102390000	102395000	chr10	102475000	102480000	.	.	.	.	255255	371	177.925	163.118	169.104	191.962	5.81082e-24	6.84482e-24	8.8347e-24	9.33024e-24	5	102397500	102481500	20881
chr10	125045000	125050000	chr10	125340000	125345000	.	.	.	.	255255	172	54.1304	56.7734	70.3571	62.7777	1.32223e-25	1.28653e-25	6.29166e-16	6.47318e-16	7	125047500	125346071	6429
chr10	61940000	61945000	chr10	61985000	61990000	.	.	.	.	255255	797	393.551	436.416	500.997	459.291	2.37796e-29	2.6791e-29	3.7848e-07	2.2656e-29	10	61955000	62009000	24870
chr10	95785000	95790000	chr10	96270000	96275000	.	.	.	.	255255	104	33.4079	42.5431	41.933	60.1883	1.30823e-13	3.54759e-08	4.17011e-08	0.000559582	1	95787500	96272500	0
chr10	87860000	87865000	chr10	88385000	88390000	.	.	.	.	255255	347	72.5853	90.9124	110.415	96.8432	0	0	0	0	13	87861346	88392884	12385
chr10	45235000	45240000	chr10	46025000	46030000	.	.	.	.	255255	116	38.672	36.6426	49.7819	33.4395	1.19524e-18	1.37593e-18	1.39504e-06	1.90377e-18	5	45246500	46027500	12083
chr10	114300000	114305000	chr10	115125000	115130000	.	.	.	.	255255	93	28.2845	26.2603	28.8857	31.5016	9.42515e-15	1.29822e-14	1.57287e-14	2.35939e-09	7	114304642	115129642	13035
chr10	72125000	72130000	chr10	72340000	72345000	.	.	.	.	255255	466	179.874	144.992	157.534	240.1	0	0	0	9.77539e-30	15	72129166	72335833	14907
chr10	14645000	14650000	chr10	14880000	14885000	.	.	.	.	255255	218	100.552	114.405	134.568	111.431	4.00731e-11	4.8058e-11	0.000573138	6.25925e-11	3	14650833	14880833	3727
chr10	122140000	122145000	chr10	122430000	122435000	.	.	.	.	255255	113	53.8274	59.2366	62.1515	55.1167	4.8059e-06	6.18008e-06	0.0237613	7.44357e-06	5	122145500	122434500	8246
chr10	101885000	101890000	chr10	102010000	102015000	.	.	.	.	255255	870	340.205	341.873	380.222	421.046	0	0	0	0	43	101877965	102007848	71152
chr10	25110000	25115000	chr10	25710000	25715000	.	.	.	.	255255	53	19.1623	15.4205	18.469	15.0683	3.14506e-06	4.89165e-09	5.39806e-06	4.89537e-09	1	25112500	25712500	0
chr10	43355000	43360000	chr10	43455000	43460000	.	.	.	.	255255	273	95.467	85.0903	75.0533	158.32	9.282e-42	8.291e-42	0	8.33448e-05	3	43354166	43459166	3727
chr10	88560000	88565000	chr10	88805000	88810000	.	.	.	.	255255	307	155.103	129.607	170.5	151.177	4.18971e-10	3.42128e-22	6.92072e-10	4.85341e-22	16	88570312	88807500	19327
chr10	114470000	114475000	chr10	114790000	114795000	.	.	.	.	255255	272	107.789	127.931	151.5	131.06	6.43345e-26	1.78132e-13	2.30293e-13	2.34171e-13	13	114472500	114786730	16544
chr10	22000000	22005000	chr10	22250000	22255000	.	.	.	.	255255	238	103.482	97.9606	125.074	95.0978	5.59858e-16	6.21563e-16	7.82021e-07	1.08224e-27	8	22000625	22246875	11626
chr10	78045000	78050000	chr10	78305000	78310000	.	.	.	.	255255	212	97.5202	92.011	114.611	90.6121	8.01408e-10	4.14932e-19	1.23279e-09	6.33154e-19	6	78043333	78302500	7683
chr10	106620000	106630000	chr10	109850000	109860000	.	.	.	.	255255	89	31.7589	27.7977	30.4668	32.7742	5.43391e-08	1.72236e-12	1.91967e-12	1.35816e-07	1	106625000	109855000	0
chr10	52880000	52890000	chr10	55730000	55740000	.	.	.	.	255255	86	28.8249	32.011	33.8946	37.7301	9.33008e-12	1.13952e-06	1.1355e-06	1.15023e-06	2	52885000	55740000	5000
chr10	91795000	91800000	chr10	91905000	91910000	.	.	.	.	255255	153	62.6263	70.7071	72.0647	92.7099	1.58432e-10	1.83739e-10	2.349e-10	0.000124275	1	91797500	91907500	0
chr10	13160000	13165000	chr10	13300000	13305000	.	.	.	.	255255	489	140.094	142.435	169.931	168.373	0	0	0	0	10	13163500	13299000	12176
chr10	48975000	48980000	chr10	49165000	49170000	.	.	.	.	255255	263	139.1	113.77	127.202	137.707	1.22557e-11	4.37484e-23	1.92335e-11	1.94665e-11	12	48982500	49164166	15092
chr10	86395000	86400000	chr10	86585000	86590000	.	.	.	.	255255	631	128.969	118.635	157.048	147.744	0	0	0	0	18	86396111	86583888	21303
chr10	70550000	70555000	chr10	70760000	70765000	.	.	.	.	255255	650	169.506	161.221	236.693	174.359	0	0	0	0	26	70553846	70755769	16320
chr10	17910000	17915000	chr10	18215000	18220000	.	.	.	.	255255	145	71.103	77.3358	83.5194	84.1617	1.70152e-08	0.00188878	0.00204247	0.00207428	3	17914166	18217500	6010
chr10	47020000	47030000	chr10	47310000	47320000	.	.	.	.	255255	955	359.227	308.179	372.316	387.443	0	0	0	0	16	47039375	47315625	25875
chr10	110605000	110610000	chr10	111595000	111600000	.	.	.	.	255255	52	17.5161	13.8763	14.8229	17.0521	7.56956e-06	1.52938e-08	1.6586e-08	1.36343e-05	3	110609166	111594166	3727
chr10	98460000	98465000	chr10	99045000	99050000	.	.	.	.	255255	125	57.9122	50.3894	57.6058	59.8641	4.46084e-09	5.32963e-09	6.60977e-09	7.00637e-09	7	98465357	99043928	8836
chr10	92085000	92090000	chr10	92290000	92295000	.	.	.	.	255255	583	169.01	166.621	220.18	181.98	0	0	0	0	15	92089500	92295833	15441
chr10	11605000	11610000	chr10	11720000	11725000	.	.	.	.	255255	445	187.685	191.425	228.974	239.207	0	0	1.57709e-24	1.5119e-24	2	11610000	11722500	2500
chr10	58300000	58310000	chr10	58770000	58780000	.	.	.	.	255255	120	65.2255	56.8388	72.9793	56.393	0.00337138	4.42287e-07	0.00743301	4.97144e-07	1	58305000	58775000	0
chr10	48210000	48215000	chr10	48510000	48515000	.	.	.	.	255255	117	47.6995	49.5842	56.7131	45.9396	2.01831e-12	6.81432e-07	7.98252e-07	3.06963e-12	3	48209166	48507500	8333
chr10	70460000	70465000	chr10	70760000	70765000	.	.	.	.	255255	234	82.4456	91.4534	110.503	104.025	1.83883e-26	1.77204e-26	9.36858e-15	9.43075e-15	11	70458863	70760227	11588
chr10	117495000	117500000	chr10	118240000	118245000	.	.	.	.	255255	330	98.6341	93.3412	96.9227	137.152	0	0	0	1.03292e-28	9	117495833	118243055	9444
chr10	88935000	88940000	chr10	89025000	89030000	.	.	.	.	255255	356	155.136	153.228	235.149	149.381	3.03533e-20	2.65777e-37	1.18346e-07	4.23028e-37	2	88935000	89030000	3536
chr10	11515000	11520000	chr10	11720000	11725000	.	.	.	.	255255	756	232.425	236.063	397.066	245.031	0	0	4.14686e-22	0	15	11520833	11727166	35491
chr10	72295000	72300000	chr10	72330000	72335000	.	.	.	.	255255	548	174.731	182.855	173.637	212.057	0	0	0	0	2	72297500	72335000	2500
chr10	21490000	21500000	chr10	21730000	21740000	.	.	.	.	255255	899	440.593	329.907	363.436	387.118	0	0	0	0	9	21506111	21728333	22139
chr10	14660000	14670000	chr10	14950000	14960000	.	.	.	.	255255	289	119.566	145.602	149.487	168.586	3.60289e-31	4.8092e-17	6.58713e-17	1.11404e-06	1	14665000	14955000	0
chr10	50170000	50175000	chr10	50765000	50770000	.	.	.	.	255255	24	2.12721	1.86408	1.52239	2.26357	4.05867e-11	2.14759e-12	2.88702e-14	2.69524e-10	2	50177500	50762500	7071
chr10	71380000	71385000	chr10	71810000	71815000	.	.	.	.	255255	139	62.6645	66.6615	81.0076	72.3009	4.21081e-07	5.27594e-07	0.0126105	6.29934e-07	1	71382500	71812500	0
chr10	99560000	99565000	chr10	99610000	99615000	.	.	.	.	255255	493	216.812	211.429	228.027	239.988	3.55168e-37	4.10631e-37	5.3822e-37	5.19372e-37	9	99560833	99609722	12668
chr10	86695000	86700000	chr10	86900000	86905000	.	.	.	.	255255	508	199.938	189.776	238.473	232.109	1.6646e-41	0	2.508e-41	2.4206e-41	24	86700625	86899166	16647
chr10	61745000	61750000	chr10	61990000	61995000	.	.	.	.	255255	132	56.2243	54.6424	69.5863	55.1344	4.27142e-11	4.8987e-11	1.85989e-05	6.86838e-11	2	61747500	61990000	2500
chr10	111755000	111760000	chr10	112135000	112140000	.	.	.	.	255255	178	62.8581	56.4414	63.2399	63.6419	4.75326e-18	3.53997e-28	6.98817e-18	7.18855e-18	5	111756500	112135500	6325
chr10	92960000	92965000	chr10	93350000	93355000	.	.	.	.	255255	145	64.9952	61.2948	58.654	84.9598	1.70152e-08	2.96312e-15	4.08869e-15	0.00207428	4	92966250	93348750	12870
chr10	124990000	124995000	chr10	125340000	125345000	.	.	.	.	255255	102	57.9049	47.8467	48.456	59.6325	0.000851719	1.3413e-07	1.57929e-07	0.00130451	1	124992500	125342500	0
chr10	92590000	92595000	chr10	92875000	92880000	.	.	.	.	255255	120	60.0305	48.6382	57.5387	56.4439	9.57121e-08	1.94452e-13	1.4167e-07	1.49035e-07	2	92587500	92877500	5000
chr10	102500000	102510000	chr10	102570000	102580000	.	.	.	.	255255	2498	1171.64	1264.11	1336.07	1437.81	0	0	0	0	11	102502272	102583181	32779
chr10	26600000	26605000	chr10	26875000	26880000	.	.	.	.	255255	205	59.7797	82.2763	78.0232	111.31	9.2463e-41	5.69379e-17	8.33879e-17	3.31926e-08	9	26606388	26880833	13379
chr10	15430000	15435000	chr10	15740000	15745000	.	.	.	.	255255	191	89.2183	72.9366	91.0585	81.23	4.61966e-13	1.3057e-22	7.0405e-13	7.14689e-13	16	15435937	15731250	19062
chr10	114550000	114555000	chr10	114780000	114785000	.	.	.	.	255255	264	101.809	103.841	123.697	107.404	2.10613e-23	2.14996e-23	1.19504e-11	3.31961e-23	10	114551000	114785500	11011
chr10	35120000	35125000	chr10	36880000	36885000	.	.	.	.	255255	45	4.38071	6.32001	7.51708	11.0185	1.55297e-22	1.53841e-14	2.2652e-14	4.22972e-08	3	35119166	36879166	6871
chr10	5690000	5695000	chr10	6085000	6090000	.	.	.	.	255255	118	65.5902	55.8932	68.4411	61.7218	0.00341408	3.83111e-07	0.00491609	0.00500635	3	5694166	6087500	8334
chr10	6910000	6920000	chr10	9300000	9310000	.	.	.	.	255255	102	40.8355	41.0539	36.0422	57.1338	2.20926e-07	4.92863e-07	3.56965e-12	0.0038543	1	6915000	9305000	0
chr10	74265000	74270000	chr10	75020000	75025000	.	.	.	.	255255	520	126.107	153.562	194.602	177.888	0	0	0	0	17	74263382	75023382	15906
chr10	74740000	74745000	chr10	75100000	75105000	.	.	.	.	255255	126	60.3003	49.9671	51.391	65.0801	2.35556e-09	2.80017e-09	3.49822e-09	0.000253445	4	74747500	75097500	11180
chr10	127715000	127720000	chr10	128010000	128015000	.	.	.	.	255255	146	50.505	45.1783	56.8217	55.0821	1.25514e-15	5.64681e-24	1.85536e-15	2.00014e-15	10	127717500	128010500	13000
chr10	20860000	20865000	chr10	21015000	21020000	.	.	.	.	255255	299	123.212	115.22	126.817	146.918	4.38689e-20	3.42387e-35	6.68323e-20	6.78828e-20	8	20863750	21021250	8839
chr10	26800000	26810000	chr10	26850000	26860000	.	.	.	.	255255	1391	697.147	687.804	753.491	751.77	0	0	0	0	3	26791666	26848333	14908
chr10	63000000	63005000	chr10	63155000	63160000	.	.	.	.	255255	232	108.684	86.6629	109.307	100.656	1.93588e-14	9.04511e-26	3.00241e-14	3.01049e-14	3	63004166	63154166	6871
chr10	43140000	43145000	chr10	43450000	43455000	.	.	.	.	255255	141	70.9057	67.3285	78.0365	81.3184	1.48714e-07	1.83642e-07	0.00707146	0.0071815	3	43137500	43454166	6010
chr10	71385000	71390000	chr10	71565000	71570000	.	.	.	.	255255	344	142.772	159.963	184.27	178.759	2.57245e-33	2.25047e-17	2.84985e-17	2.97911e-17	9	71388611	71568055	10613
chr10	102830000	102835000	chr10	102900000	102905000	.	.	.	.	255255	722	274.067	255.322	266.753	304.933	0	0	0	3.1e-43	17	102835735	102903382	14885
chr10	64040000	64045000	chr10	67520000	67525000	.	.	.	.	255255	115	29.2376	28.5222	30.99	28.8089	1.11296e-25	1.65132e-25	4.97593e-18	2.10891e-25	5	64040500	67521500	6325
chr10	48660000	48665000	chr10	49510000	49515000	.	.	.	.	255255	102	36.5307	39.3704	40.59	47.3021	7.8077e-13	1.3413e-07	1.57929e-07	1.68836e-07	3	48659166	49510833	8498
chr10	107440000	107450000	chr10	110850000	110860000	.	.	.	.	255255	39	9.546	10.1628	15.3159	10.8861	3.81376e-08	4.43444e-05	0.00471182	4.12925e-05	1	107445000	110855000	0
chr10	123590000	123595000	chr10	124390000	124395000	.	.	.	.	255255	102	48.2332	47.0357	56.4561	50.5471	1.08783e-07	1.3413e-07	0.00125705	0.00130451	6	123585833	124395000	26784
chr10	14840000	14845000	chr10	14950000	14955000	.	.	.	.	255255	212	89.8905	86.5459	90.4638	100.316	4.02721e-19	4.14932e-19	6.24835e-19	1.25635e-09	2	14842500	14950000	2500
chr10	53830000	53840000	chr10	55260000	55270000	.	.	.	.	255255	121	57.3908	57.3062	61.1335	63.6873	1.2696e-07	2.45268e-07	2.71743e-07	0.00515318	1	53835000	55265000	0
chr10	14195000	14200000	chr10	14480000	14485000	.	.	.	.	255255	170	70.6561	57.26	67.7666	67.8773	1.84079e-15	8.76025e-25	2.69576e-15	2.7818e-15	11	14200227	14475227	12928
chr10	43290000	43295000	chr10	43345000	43350000	.	.	.	.	255255	454	211.466	226.95	238.973	259.459	6.67829e-27	8.21309e-27	1.05571e-26	1.85381e-10	7	43293214	43348214	15386
chr10	45465000	45470000	chr10	45720000	45725000	.	.	.	.	255255	85	23.2574	22.2326	26.6221	22.8951	1.22912e-16	2.09223e-16	3.81928e-11	2.47763e-16	7	45465357	45729642	8361
chr10	45305000	45310000	chr10	45460000	45465000	.	.	.	.	255255	182	78.6602	87.0519	92.0703	91.2038	9.02449e-11	1.05244e-10	1.36431e-10	1.38656e-10	3	45307500	45462500	5000
chr10	74265000	74270000	chr10	74820000	74825000	.	.	.	.	255255	234	84.9856	93.4811	137.766	85.6692	1.83883e-26	1.77204e-26	3.3712e-06	2.92769e-26	2	74272500	74822500	5000
chr10	48550000	48555000	chr10	48700000	48705000	.	.	.	.	255255	181	75.3984	81.4104	110.147	84.175	4.57998e-19	1.84635e-10	0.000367658	2.42354e-10	1	48552500	48702500	0
chr10	48995000	49000000	chr10	49390000	49395000	.	.	.	.	255255	107	47.5319	52.2103	58.9287	56.6992	3.68947e-09	0.00012765	0.000139234	0.00014527	1	48997500	49392500	0
chr10	33330000	33335000	chr10	34635000	34640000	.	.	.	.	255255	199	30.6681	31.5901	41.3947	39.0107	0	0	0	0	13	33330576	34638653	11980
chr10	89645000	89650000	chr10	89700000	89705000	.	.	.	.	255255	464	222.241	227.439	241.379	282.761	2.12489e-29	2.57843e-29	3.30186e-29	5.84942e-12	6	89648333	89700000	13176
chr10	103965000	103970000	chr10	104120000	104125000	.	.	.	.	255255	374	134.85	140.97	131.211	174.642	0	0	0	1.55688e-24	7	103970357	104121785	12164
chr10	103080000	103085000	chr10	103240000	103245000	.	.	.	.	255255	544	239.784	240.131	258.143	320.137	0	0	3.39087e-27	2.02318e-09	14	103080714	103242857	31788
chr10	61895000	61900000	chr10	62240000	62245000	.	.	.	.	255255	438	154.571	187.5	202.03	212.162	0	0	6.77655e-23	6.51008e-23	15	61896166	62247166	14727
chr10	38090000	38095000	chr10	38400000	38405000	.	.	.	.	255255	44	13.1288	11.8889	15.0973	14.2565	2.44634e-05	1.38932e-07	4.73897e-05	4.64481e-05	1	38092500	38402500	0
chr10	23995000	24000000	chr10	24555000	24560000	.	.	.	.	255255	129	40.0281	32.8213	51.5239	29.7147	7.44542e-17	1.10027e-24	4.90447e-10	2.24565e-33	2	24000000	24557500	2500
chr10	117855000	117860000	chr10	118240000	118245000	.	.	.	.	255255	226	93.2853	90.7224	92.461	113.386	1.10568e-23	1.09161e-23	1.73225e-23	8.87874e-13	5	117860500	118241500	6325
chr10	70810000	70815000	chr10	70880000	70885000	.	.	.	.	255255	574	176.746	164.568	176.187	182.753	0	0	0	0	17	70815735	70879852	22973
chr10	29510000	29515000	chr10	30670000	30675000	.	.	.	.	255255	55	3.77483	3.39381	3.8897	3.67864	4.1373e-37	1.50541e-36	1.80018e-36	2.16248e-36	2	29510000	30672500	2500
chr10	119685000	119690000	chr10	119855000	119860000	.	.	.	.	255255	608	155.543	178.812	223.491	216.214	0	0	0	0	13	119685576	119855576	9792
chr10	84265000	84270000	chr10	84715000	84720000	.	.	.	.	255255	125	41.3879	46.8035	57.5478	50.3398	2.54625e-15	2.76668e-15	6.60977e-09	7.00637e-09	1	84267500	84717500	0
chr10	106620000	106630000	chr10	108780000	108790000	.	.	.	.	255255	109	56.9755	51.1787	52.497	54.1229	8.00521e-05	0.000163544	0.000174801	0.000176557	1	106625000	108785000	0
chr10	23155000	23160000	chr10	23695000	23700000	.	.	.	.	255255	108	48.8756	44.0628	45.932	56.2249	5.88152e-05	2.15093e-09	2.60626e-09	9.09346e-05	5	23159500	23701500	6325
chr10	122650000	122660000	chr10	123560000	123570000	.	.	.	.	255255	104	49.6353	54.4424	60.229	55.213	0.000765038	0.00160971	0.00169598	0.00169674	2	122650000	123565000	5000
chr10	72360000	72365000	chr10	72565000	72570000	.	.	.	.	255255	207	84.5903	68.7085	99.1819	69.881	1.35923e-17	9.08277e-29	1.30814e-08	1.52055e-28	6	72366666	72564166	15921
chr10	89020000	89025000	chr10	89565000	89570000	.	.	.	.	255255	105	57.7841	50.6687	54.1186	60.7761	0.000234466	0.000322504	0.000346628	0.000359945	1	89022500	89567500	0
chr10	38920000	38930000	chr10	39290000	39300000	.	.	.	.	255255	100	44.7981	42.8019	57.201	44.5514	8.01243e-07	1.77113e-06	0.00845207	1.80274e-06	2	38925000	39285000	10000
chr10	110305000	110310000	chr10	110545000	110550000	.	.	.	.	255255	796	268.581	220.936	336.339	260.978	0	0	0	0	17	110314264	110548676	14706
chr10	125975000	125980000	chr10	127860000	127865000	.	.	.	.	255255	77	35.502	30.5868	34.2918	31.6674	8.77998e-05	3.65486e-08	0.000135555	0.000138976	8	125980625	127855000	8501
chr10	96915000	96920000	chr10	97025000	97030000	.	.	.	.	255255	431	168.459	170.578	199.918	199.042	2.1087e-41	2.2617e-41	2.58131e-21	2.48879e-21	11	96912500	97027500	11180
chr10	31320000	31325000	chr10	31750000	31755000	.	.	.	.	255255	73	23.6588	31.1535	36.0015	29.7805	6.22648e-11	0.00114715	0.00118019	9.81046e-07	1	31322500	31752500	0
chr10	77250000	77255000	chr10	77710000	77715000	.	.	.	.	255255	187	85.0792	99.2162	103.132	117.294	5.10573e-12	4.14196e-05	4.75318e-05	4.88972e-05	1	77252500	77712500	0
chr10	109975000	109980000	chr10	110135000	110140000	.	.	.	.	255255	278	143.937	128.011	152.244	133.85	6.56252e-15	7.75755e-15	1.01628e-14	1.03274e-14	5	109978500	110135500	6325
chr10	60815000	60820000	chr10	61285000	61290000	.	.	.	.	255255	123	47.8302	44.1501	50.484	53.5919	1.42139e-14	1.55115e-14	2.30601e-08	2.43303e-08	9	60815833	61284166	11785
chr10	61980000	61990000	chr10	67760000	67770000	.	.	.	.	255255	43	12.2175	13.5637	13.5132	18.6135	1.36906e-07	0.000179632	0.000185829	0.0165755	1	61985000	67765000	0
chr10	70225000	70230000	chr10	70540000	70545000	.	.	.	.	255255	141	61.4216	60.3961	73.6378	66.7003	1.48714e-07	6.73733e-14	2.20566e-07	2.22781e-07	4	70218750	70538750	9520
chr10	27555000	27560000	chr10	27655000	27660000	.	.	.	.	255255	338	77.6562	71.3864	77.2112	82.0616	0	0	0	0	14	27560714	27655000	16971
chr10	6420000	6430000	chr10	9300000	9310000	.	.	.	.	255255	64	28.368	20.3053	20.2855	29.3621	0.000424153	9.13552e-07	8.44793e-07	0.000987327	2	6420000	9305000	5000
chr10	92885000	92890000	chr10	93350000	93355000	.	.	.	.	255255	161	60.1765	51.01	59.9892	66.0623	3.73883e-21	3.75375e-21	5.75183e-21	1.43503e-12	13	92889038	93350961	13549
chr10	7870000	7875000	chr10	8045000	8050000	.	.	.	.	255255	125	54.2502	49.2832	52.6076	49.1415	4.46084e-09	5.32963e-09	6.60977e-09	7.00637e-09	1	7872500	8047500	0
chr10	53610000	53620000	chr10	57640000	57650000	.	.	.	.	255255	58	24.967	26.0134	25.833	26.4876	0.0110608	0.0260007	0.0247874	0.0248109	2	53610000	57650000	7071
chr10	60205000	60210000	chr10	60430000	60435000	.	.	.	.	255255	237	87.2038	83.0139	74.9576	142.146	1.54244e-27	1.48121e-27	2.1836e-41	1.16041e-06	2	60205000	60432500	2500
chr10	131455000	131460000	chr10	131785000	131790000	.	.	.	.	255255	146	52.3658	58.1311	66.4406	62.1876	1.25514e-15	1.34084e-15	1.44516e-08	1.45186e-08	3	131452500	131789166	6010
chr10	77390000	77395000	chr10	77715000	77720000	.	.	.	.	255255	167	84.7938	81.3804	85.0233	92.9155	2.08261e-07	2.61809e-07	3.14362e-07	3.20416e-07	4	77395000	77712500	7500
chr10	62610000	62615000	chr10	62810000	62815000	.	.	.	.	255255	586	196.673	173.993	207.172	241.075	0	0	0	0	19	62613815	62814342	24653
chr10	115170000	115175000	chr10	116285000	116290000	.	.	.	.	255255	62	20.8363	22.6289	25.5035	23.6656	1.53049e-06	2.41406e-06	0.0013896	2.53735e-06	2	115167500	116290000	5590
chr10	3880000	3885000	chr10	3930000	3935000	.	.	.	.	255255	221	100.319	107.457	110.828	134.74	8.4059e-12	9.9756e-12	1.29816e-11	0.000242642	2	3890000	3932500	7500
chr10	77170000	77175000	chr10	77640000	77645000	.	.	.	.	255255	578	125.832	121.908	178.26	140.151	0	0	0	0	25	77171700	77642300	16513
chr10	67555000	67560000	chr10	67590000	67595000	.	.	.	.	255255	181	84.2173	91.4938	61.2439	115.057	1.577e-10	1.84635e-10	2.81145e-29	0.000377284	1	67557500	67592500	0
chr10	58950000	58955000	chr10	59620000	59625000	.	.	.	.	255255	192	45.2685	50.1916	67.5829	52.7366	0	1.65373e-34	8.56764e-23	3.00809e-34	7	58953214	59620357	7889
chr10	103415000	103420000	chr10	103475000	103480000	.	.	.	.	255255	1132	388.225	422.834	460.667	583.303	0	0	0	0	27	103420648	103481759	47835
chr10	64040000	64045000	chr10	66925000	66930000	.	.	.	.	255255	157	34.6706	38.142	46.354	46.4417	8.30883e-40	9.80191e-40	6.42464e-29	6.66763e-29	9	64040277	66931388	9462
chr10	119195000	119200000	chr10	119540000	119545000	.	.	.	.	255255	186	70.6608	72.7324	91.0135	68.2426	8.39556e-21	8.41885e-21	1.38944e-11	1.26888e-20	3	119202500	119542500	5000
chr10	86260000	86265000	chr10	86375000	86380000	.	.	.	.	255255	178	101.039	83.119	92.8463	100.559	0.000619351	9.59491e-10	1.22432e-09	0.000969037	6	86260833	86370833	11785
chr10	88065000	88070000	chr10	88265000	88270000	.	.	.	.	255255	126	53.6725	56.4709	53.9186	73.0293	2.35556e-09	2.80017e-09	3.49822e-09	0.000253445	1	88067500	88267500	0
chr10	36880000	36890000	chr10	38360000	38370000	.	.	.	.	255255	72	21.012	16.3931	22.3685	16.0028	1.49451e-10	1.08631e-14	5.23173e-10	1.25959e-14	2	36890000	38365000	5000
chr10	5685000	5690000	chr10	5860000	5865000	.	.	.	.	255255	252	105.309	121.342	155.445	128.926	7.91017e-20	8.37632e-20	0.0137759	2.84339e-09	4	5687500	5870000	9014
chr10	110410000	110415000	chr10	110500000	110505000	.	.	.	.	255255	738	330.273	348.991	354.901	411.014	0	0	0	3.91036e-19	7	110416785	110498928	10810
chr10	106710000	106715000	chr10	109850000	109855000	.	.	.	.	255255	45	16.1021	13.6272	11.7553	15.9713	0.00160005	1.99898e-05	4.58284e-08	0.0026117	2	106707500	109852500	5000
chr10	128030000	128035000	chr10	128070000	128075000	.	.	.	.	255255	659	247.645	244.606	258.884	296.086	0	0	0	0	10	128027500	128073500	11662
chr10	18650000	18660000	chr10	21520000	21530000	.	.	.	.	255255	106	35.6025	38.0962	53.0174	32.4626	2.74409e-14	7.77892e-14	0.000705549	8.51233e-14	1	18655000	21525000	0
chr10	69010000	69015000	chr10	69090000	69095000	.	.	.	.	255255	815	319.546	346.859	395.603	459.957	0	0	6.07806e-33	7.1097e-33	23	69005760	69100108	19254
chr10	28560000	28565000	chr10	28600000	28605000	.	.	.	.	255255	212	101.977	112.39	115.454	117.548	8.01408e-10	9.8234e-10	1.23279e-09	1.25635e-09	2	28562500	28610000	7500
chr10	39080000	39085000	chr10	39310000	39315000	.	.	.	.	255255	119	56.5121	63.7839	74.7429	62.2384	1.72031e-07	0.00335681	0.00349654	0.00355213	1	39082500	39312500	0
chr10	43605000	43610000	chr10	43640000	43645000	.	.	.	.	255255	547	180.852	233.473	180.862	268.315	0	0	0	7.16893e-28	7	43601071	43648214	29137
chr10	17600000	17605000	chr10	18215000	18220000	.	.	.	.	255255	100	40.4539	46.0562	61.2715	47.9389	3.88143e-07	4.87871e-07	0.00281337	6.04533e-07	7	17606785	18226785	10739
chr10	96390000	96400000	chr10	96500000	96510000	.	.	.	.	255255	1065	495.785	518.475	673.134	548.947	0	0	6.98863e-16	0	8	96388750	96507500	18583
chr10	127900000	127910000	chr10	128150000	128160000	.	.	.	.	255255	284	136.614	153.027	158.603	183.921	6.00873e-16	8.02188e-16	5.61069e-06	5.75102e-06	1	127905000	128155000	0
chr10	69515000	69520000	chr10	69635000	69640000	.	.	.	.	255255	1031	172.542	163.105	194.214	206.231	0	0	0	0	20	69519250	69635500	17090
chr10	28665000	28670000	chr10	28990000	28995000	.	.	.	.	255255	322	76.0213	76.9802	80.4558	101.931	0	0	0	0	19	28671447	28990921	17387
chr10	52955000	52960000	chr10	53595000	53600000	.	.	.	.	255255	128	50.2152	65.7556	66.6428	69.0936	6.39776e-10	9.84912e-05	0.000108358	0.000110268	4	52951250	53597500	10078
chr10	99390000	99395000	chr10	99545000	99550000	.	.	.	.	255255	182	84.7149	94.0646	111.904	97.8179	9.02449e-11	1.05244e-10	0.000265103	0.000272111	1	99392500	99547500	0
chr10	3940000	3945000	chr10	4655000	4660000	.	.	.	.	255255	105	46.9121	44.7673	44.5593	60.0711	1.4713e-08	1.78564e-08	2.1251e-08	0.000359945	1	3942500	4657500	0
chr10	69425000	69430000	chr10	69635000	69640000	.	.	.	.	255255	202	79.2738	76.5548	88.1432	102.873	4.08255e-16	8.76403e-27	6.32253e-16	1.25937e-07	8	69423750	69638125	15474
chr10	94625000	94630000	chr10	95360000	95365000	.	.	.	.	255255	123	37.573	42.5853	47.8601	45.1287	7.36315e-22	1.55115e-14	2.02528e-14	2.14908e-14	7	94632500	95358928	10619
chr10	79370000	79380000	chr10	79460000	79470000	.	.	.	.	255255	1553	610.136	674.036	823.649	796.605	0	0	0	0	13	79383461	79480384	19231
chr10	117005000	117010000	chr10	117170000	117175000	.	.	.	.	255255	108	55.0372	50.809	54.1034	60.4246	5.88152e-05	7.90471e-05	8.72866e-05	9.09346e-05	1	117007500	117172500	0
chr10	7530000	7535000	chr10	9210000	9215000	.	.	.	.	255255	76	29.0741	25.5649	30.8408	30.4066	5.83666e-08	8.28343e-08	9.06544e-08	9.50435e-08	6	7531666	9209166	6719
chr10	73885000	73890000	chr10	75235000	75240000	.	.	.	.	255255	57	20.8388	17.1714	18.0111	23.7979	6.99398e-05	1.38343e-07	1.38921e-07	0.00011514	1	73887500	75237500	0
chr10	39080000	39085000	chr10	39350000	39355000	.	.	.	.	255255	101	46.5476	53.2161	59.8054	51.6297	2.06679e-07	0.00181363	0.00188997	0.00195411	1	39082500	39352500	0
chr10	68210000	68215000	chr10	68345000	68350000	.	.	.	.	255255	142	79.5759	69.0515	94.6613	59.7829	0.00355501	1.07187e-07	0.00523531	4.58009e-14	1	68212500	68347500	0
chr10	88270000	88275000	chr10	88385000	88390000	.	.	.	.	255255	565	235.465	220.683	216.813	275.582	0	0	0	4.44219e-32	7	88274642	88388214	9146
chr10	60810000	60820000	chr10	61140000	61150000	.	.	.	.	255255	301	140.667	135.658	170.853	128.055	3.11329e-20	4.01284e-20	1.48493e-08	5.99221e-20	2	60815000	61140000	5000
chr10	68990000	68995000	chr10	69390000	69395000	.	.	.	.	255255	150	73.7337	74.453	75.6309	92.6029	9.66098e-10	1.13633e-09	1.43592e-09	0.000376802	8	69001875	69397500	11473
chr10	110410000	110415000	chr10	110855000	110860000	.	.	.	.	255255	130	45.7684	51.7133	49.8756	64.6292	3.00864e-17	1.94844e-10	2.5027e-10	4.63523e-05	4	110417500	110866250	17366
chr10	74265000	74270000	chr10	75095000	75100000	.	.	.	.	255255	461	123.951	135.227	138.118	206.208	0	0	0	1.83628e-28	21	74253928	75099880	18370
chr10	58300000	58305000	chr10	58530000	58535000	.	.	.	.	255255	116	52.6011	44.5072	60.9513	45.1197	9.46687e-07	5.03711e-12	1.39504e-06	6.79382e-12	1	58302500	58532500	0
chr10	110220000	110225000	chr10	110410000	110415000	.	.	.	.	255255	118	51.3683	62.9678	75.1772	66.4575	3.06809e-07	0.00475027	0.00491609	0.00500635	1	110222500	110412500	0
chr10	26570000	26575000	chr10	27320000	27325000	.	.	.	.	255255	88	14.4322	14.8882	23.5534	13.8372	3.26478e-31	5.98686e-31	7.8891e-18	8.80385e-31	5	26572500	27327500	10000
chr10	6105000	6110000	chr10	6150000	6155000	.	.	.	.	255255	751	171.098	188.325	232.135	207.556	0	0	0	0	13	6109423	6152884	16232
chr10	69245000	69250000	chr10	69635000	69640000	.	.	.	.	255255	116	54.7993	49.977	58.8749	54.0954	9.46687e-07	1.19798e-06	1.39504e-06	1.47389e-06	4	69248750	69638750	6374
chr10	63165000	63170000	chr10	63715000	63720000	.	.	.	.	255255	758	198.507	174.741	195.726	228.393	0	0	0	0	14	63165000	63716428	18715
chr10	14500000	14505000	chr10	14965000	14970000	.	.	.	.	255255	195	92.2818	81.0838	82.7588	95.7036	3.84396e-14	4.25359e-14	5.88692e-14	5.97754e-14	5	14501500	14969500	6325
chr10	91005000	91010000	chr10	91215000	91220000	.	.	.	.	255255	295	77.3286	116.684	190.995	93.4837	0	9.48398e-34	6.73118e-08	0	1	91007500	91217500	0
chr10	131895000	131900000	chr10	132450000	132455000	.	.	.	.	255255	51	23.5567	19.6817	21.9064	21.2173	0.0031645	0.00545253	0.00506576	0.00509349	1	131897500	132452500	0
chr10	89640000	89650000	chr10	90980000	90990000	.	.	.	.	255255	128	63.1327	61.752	62.928	68.8113	0.000162404	0.000325497	0.000359972	0.000353985	2	89645000	90990000	5000
chr10	62610000	62615000	chr10	62730000	62735000	.	.	.	.	255255	384	196.17	181.682	244.37	204.937	2.99251e-12	2.44368e-27	0.00958888	4.96337e-12	4	62617500	62736250	17366
chr10	127715000	127720000	chr10	127850000	127855000	.	.	.	.	255255	208	59.5781	56.5511	64.8052	62.9435	0	0	5.73693e-29	6.03901e-29	5	127719500	127850500	15264
chr10	100235000	100240000	chr10	100430000	100435000	.	.	.	.	255255	114	57.82	56.922	51.7875	67.2206	2.82099e-06	3.61053e-06	4.17551e-06	0.0179629	1	100237500	100432500	0
chr10	69515000	69520000	chr10	69715000	69720000	.	.	.	.	255255	202	72.6396	70.5303	85.4579	77.338	9.04663e-27	8.76403e-27	6.32253e-16	6.37252e-16	5	69515500	69721500	6325
chr10	88685000	88690000	chr10	88930000	88935000	.	.	.	.	255255	136	65.4	66.4436	76.6127	72.0161	1.88754e-06	2.41621e-06	2.79833e-06	2.82694e-06	1	88687500	88932500	0
chr10	117650000	117660000	chr10	119700000	119710000	.	.	.	.	255255	61	14.5672	16.8902	19.978	16.0256	7.81111e-14	3.67321e-09	1.01899e-05	3.78374e-09	1	117655000	119705000	0
chr10	50040000	50050000	chr10	50210000	50220000	.	.	.	.	255255	309	141.302	168.349	197.767	202.589	2.12805e-22	5.1467e-10	0.024387	0.0247586	3	50041666	50218333	7454
chr10	77845000	77850000	chr10	77975000	77980000	.	.	.	.	255255	198	86.7777	85.5948	107.078	94.1178	5.65274e-15	6.16805e-15	6.75168e-07	8.77513e-15	4	77853750	77975000	13975
chr10	18685000	18690000	chr10	20855000	20860000	.	.	.	.	255255	49	19.5819	14.9259	19.1532	14.2445	0.00916102	3.90005e-07	0.000148273	3.74526e-07	2	18690000	20857500	2500
chr10	55090000	55095000	chr10	55735000	55740000	.	.	.	.	255255	42	14.6249	13.6337	13.4419	16.7394	0.000143837	0.00029193	0.000259222	0.015616	2	55092500	55740000	2500
chr10	100670000	100680000	chr10	100870000	100880000	.	.	.	.	255255	734	355.608	348.626	363.812	419.723	0	0	0	1.48509e-18	4	100672500	100875000	10308
chr10	7420000	7425000	chr10	7685000	7690000	.	.	.	.	255255	238	74.3986	80.3136	84.9417	121.31	4.428e-42	6.42348e-28	1.06772e-27	8.72435e-16	5	7418500	7685500	16125
chr10	13370000	13375000	chr10	13530000	13535000	.	.	.	.	255255	237	84.1195	76.1794	101.079	77.1653	1.54244e-27	1.1929e-41	1.5842e-15	2.2777e-41	7	13373928	13533928	8690
chr10	43670000	43675000	chr10	44865000	44870000	.	.	.	.	255255	184	48.9325	37.7746	47.2627	44.8005	7.99051e-31	0	0	0	21	43675119	44861547	15334
chr10	96225000	96230000	chr10	96295000	96300000	.	.	.	.	255255	802	220.429	208.353	264.724	236.659	0	0	0	0	21	96232976	96295595	29585
chr10	27560000	27565000	chr10	28390000	28395000	.	.	.	.	255255	77	35.2304	36.2139	36.9072	42.5477	8.77998e-05	0.00012739	0.000135555	0.0440285	4	27560000	28383750	9100
chr10	2930000	2935000	chr10	2970000	2975000	.	.	.	.	255255	407	171.241	186.858	221.017	223.499	6.01772e-34	6.58289e-34	2.8609e-16	2.75118e-16	11	2933863	2977045	13561
chr10	43290000	43295000	chr10	43460000	43465000	.	.	.	.	255255	622	100.891	124.434	120.786	212.75	0	0	0	0	13	43291730	43464038	14111
chr10	95370000	95375000	chr10	95600000	95605000	.	.	.	.	255255	492	155.222	127.71	145.452	157.731	0	0	0	0	11	95374318	95601590	16225
chr10	2840000	2845000	chr10	2970000	2975000	.	.	.	.	255255	114	56.3186	62.7362	71.8419	65.4318	2.82099e-06	0.01745	0.0177004	0.0179629	3	2840833	2975833	3727
chr10	43200000	43205000	chr10	43460000	43465000	.	.	.	.	255255	164	49.9817	56.383	60.5671	79.4429	2.45023e-22	2.44375e-22	3.81834e-22	1.27933e-06	8	43203125	43459375	9882
chr10	94625000	94630000	chr10	95240000	95245000	.	.	.	.	255255	101	34.6046	37.3195	49.4205	36.5006	1.88656e-12	2.34944e-12	0.00188997	3.02737e-12	2	94630000	95242500	2500
chr10	30780000	30790000	chr10	31310000	31320000	.	.	.	.	255255	510	238.992	273.683	292.971	332.767	7.009e-42	5.14195e-20	6.92036e-20	1.62251e-05	2	30785000	31320000	5000
chr10	91755000	91760000	chr10	91915000	91920000	.	.	.	.	255255	390	144.692	118.599	128.233	136.657	0	0	0	0	12	91760833	91909583	13340
chr10	3245000	3250000	chr10	4655000	4660000	.	.	.	.	255255	249	83.949	99.1974	101.737	117.723	5.32968e-32	6.04706e-19	8.88011e-19	8.83532e-19	12	3239166	4654166	11784
chr10	63220000	63225000	chr10	63465000	63470000	.	.	.	.	255255	174	66.4294	73.8965	76.8017	88.6988	9.8227e-17	1.02602e-16	1.43933e-16	1.01725e-08	2	63220000	63467500	2500
chr10	99845000	99850000	chr10	100045000	100050000	.	.	.	.	255255	764	207.042	218.246	295.516	255.147	0	0	0	0	19	99850657	100042500	17074
chr10	111070000	111075000	chr10	111595000	111600000	.	.	.	.	255255	88	43.0216	36.909	38.9186	41.724	0.000315882	8.73523e-08	0.00047259	0.000496884	4	111076250	111597500	5154
chr10	99840000	99845000	chr10	100100000	100105000	.	.	.	.	255255	157	69.4782	64.5835	81.3882	64.0458	1.29497e-11	1.4692e-11	2.53625e-05	1.95381e-11	1	99842500	100102500	0
chr10	71650000	71655000	chr10	71895000	71900000	.	.	.	.	255255	180	99.9597	88.4404	91.3636	103.153	0.000331275	3.21593e-10	4.13911e-10	0.00051934	1	71652500	71897500	0
chr10	117215000	117220000	chr10	117315000	117320000	.	.	.	.	255255	382	117.398	102.968	126.318	119.48	0	0	0	0	16	117220625	117316875	12406
chr10	93700000	93705000	chr10	93810000	93815000	.	.	.	.	255255	272	101.785	101.79	105.395	125.025	6.43345e-26	6.42131e-26	1.00996e-25	2.34171e-13	6	93700833	93815000	7683
chr10	6010000	6015000	chr10	6085000	6090000	.	.	.	.	255255	449	163.787	172.797	219.47	224.305	0	0	1.743e-25	1.67005e-25	10	6014500	6079500	27166
chr10	74585000	74590000	chr10	75020000	75025000	.	.	.	.	255255	212	96.8089	101.773	102.689	134.931	4.02721e-19	9.8234e-10	1.23279e-09	0.00295567	4	74588750	75013750	11319
chr10	67520000	67525000	chr10	67775000	67780000	.	.	.	.	255255	228	72.5596	65.4107	71.3529	85.642	1.23618e-37	1.15424e-37	2.03634e-37	3.6655e-24	5	67524500	67778500	6325
chr10	32250000	32260000	chr10	32370000	32380000	.	.	.	.	255255	1359	694.816	579.919	785.965	618.844	0	0	4.48891e-22	0	1	32255000	32375000	0
chr10	88890000	88895000	chr10	91190000	91195000	.	.	.	.	255255	26	6.09414	6.56733	6.92589	7.4502	3.57685e-05	0.00492281	0.00394836	0.00372461	1	88892500	91192500	0
chr11	2945000	2950000	chr11	2985000	2990000	.	.	.	.	255255	233	114.379	129.036	137.488	132.006	1.08454e-14	4.0421e-06	4.7942e-06	4.89765e-06	1	2947500	2987500	0
chr11	72825000	72830000	chr11	73240000	73245000	.	.	.	.	255255	260	122.592	117.787	143.972	132.877	4.97391e-11	3.59587e-22	7.83188e-11	7.92111e-11	5	72833500	73241500	15232
chr11	79710000	79715000	chr11	81495000	81500000	.	.	.	.	255255	36	14.6561	13.2402	13.3655	14.5895	0.0117648	0.0221097	0.0181154	0.0181464	2	79710000	81497500	2500
chr11	40280000	40285000	chr11	40330000	40335000	.	.	.	.	255255	90	22.2349	36.2388	38.7946	41.7335	3.00178e-19	1.9677e-08	2.32287e-08	0.000184351	1	40282500	40332500	0
chr11	121250000	121255000	chr11	121590000	121595000	.	.	.	.	255255	354	158.08	160.555	169.104	208.787	9.04649e-20	1.10381e-19	1.40762e-19	2.19375e-07	12	121245000	121592916	12835
chr11	76420000	76425000	chr11	76680000	76685000	.	.	.	.	255255	115	58.1877	56.8868	50.9927	72.5351	1.63807e-06	2.08893e-06	2.42306e-06	0.0132428	1	76422500	76682500	0
chr11	62905000	62910000	chr11	63020000	63025000	.	.	.	.	255255	986	180.511	144.911	195.402	178.215	0	0	0	0	26	62906538	63022115	18269
chr11	109860000	109865000	chr11	110370000	110375000	.	.	.	.	255255	211	62.4466	90.0724	112.914	95.8137	2.24233e-30	8.51925e-19	1.9984e-09	1.29566e-18	8	109853750	110373125	9783
chr11	58570000	58580000	chr11	59550000	59560000	.	.	.	.	255255	151	63.2022	70.3483	70.2241	83.1746	1.3736e-09	2.48704e-09	3.01003e-09	0.000761283	2	58580000	59555000	5000
chr11	10930000	10935000	chr11	11785000	11790000	.	.	.	.	255255	147	49.0937	45.5163	46.9685	52.4457	5.65201e-16	2.00787e-24	2.8107e-24	8.93693e-16	10	10933000	11786500	15042
chr11	2310000	2315000	chr11	2415000	2420000	.	.	.	.	255255	398	96.8215	105.932	135.908	162.215	0	0	0	4.06612e-31	19	2307236	2419605	13200
chr11	55100000	55110000	chr11	56270000	56280000	.	.	.	.	255255	88	44.1897	39.4899	41.3878	43.6482	0.000632743	0.00140143	0.00140911	0.00141705	1	55105000	56275000	0
chr11	95920000	95925000	chr11	96335000	96340000	.	.	.	.	255255	207	83.9347	118.136	134.765	111.617	1.35923e-17	1.06336e-08	0.00998518	1.33734e-08	1	95922500	96337500	0
chr11	58575000	58580000	chr11	59100000	59105000	.	.	.	.	255255	118	45.4219	48.7155	58.9462	53.2919	9.0143e-13	1.0096e-12	4.5336e-07	4.77265e-07	1	58577500	59102500	0
chr11	14280000	14290000	chr11	14760000	14770000	.	.	.	.	255255	197	81.6849	94.4936	103.954	120.763	3.00283e-14	4.69718e-14	2.95789e-06	3.08668e-06	1	14285000	14765000	0
chr11	64000000	64005000	chr11	64145000	64150000	.	.	.	.	255255	380	117.786	103.44	114.488	140.779	0	0	0	0	18	64001388	64150000	13914
chr11	116880000	116885000	chr11	117100000	117105000	.	.	.	.	255255	717	174.692	185.738	209.451	260.415	0	0	0	0	21	116881547	117107500	17517
chr11	69685000	69690000	chr11	69885000	69890000	.	.	.	.	255255	306	75.8968	61.2955	85.3534	68.0495	0	0	0	0	18	69690000	69890277	17403
chr11	31485000	31490000	chr11	31955000	31960000	.	.	.	.	255255	234	66.0723	73.2185	86.8171	87.3052	2.49483e-40	2.30762e-40	2.90951e-26	2.92769e-26	8	31490000	31955625	15117
chr11	129110000	129115000	chr11	129745000	129750000	.	.	.	.	255255	104	47.6383	45.128	53.9697	46.235	2.89248e-08	3.54759e-08	0.000537809	4.49195e-08	8	129118125	129750000	8683
chr11	2185000	2190000	chr11	2295000	2300000	.	.	.	.	255255	264	137.356	122.555	138.518	126.258	7.61341e-12	9.37391e-12	1.19504e-11	1.2089e-11	5	2192500	2295500	13928
chr11	120930000	120935000	chr11	121110000	121115000	.	.	.	.	255255	218	105.147	107.88	103.375	131.192	4.00731e-11	4.8058e-11	6.16565e-11	0.000580789	3	120937500	121109166	8333
chr11	57345000	57350000	chr11	57480000	57485000	.	.	.	.	255255	272	97.7108	99.3231	161.254	70.182	6.43345e-26	6.42131e-26	0.000107994	0	1	57347500	57482500	0
chr11	106720000	106725000	chr11	107015000	107020000	.	.	.	.	255255	104	49.1795	51.8311	59.2334	53.8092	0.000364349	0.000505359	0.000537809	0.000559582	3	106722500	107029166	11666
chr11	48770000	48780000	chr11	55200000	55210000	.	.	.	.	255255	40	10.7294	14.1117	14.5703	11.5178	4.15173e-06	0.00224434	0.00221584	1.46942e-05	1	48775000	55205000	0
chr11	128170000	128175000	chr11	128855000	128860000	.	.	.	.	255255	436	166.067	149.468	234.521	159.244	0	0	1.94211e-22	0	2	128170000	128857500	2500
chr11	34925000	34930000	chr11	35485000	35490000	.	.	.	.	255255	158	60.7941	61.7857	62.3513	65.9281	5.38938e-20	7.70738e-12	1.00412e-11	1.02796e-11	2	34927500	35485000	2500
chr11	19745000	19750000	chr11	19900000	19905000	.	.	.	.	255255	170	83.7249	77.6769	75.1503	94.4345	4.92863e-08	6.07657e-08	2.69576e-15	7.57174e-08	6	19749166	19900000	8701
chr11	92940000	92945000	chr11	93645000	93650000	.	.	.	.	255255	149	52.9881	45.2304	63.9845	54.0751	1.12105e-16	2.51489e-25	2.59333e-09	1.77325e-16	8	92943125	93651250	11267
chr11	67120000	67125000	chr11	67155000	67160000	.	.	.	.	255255	392	175.819	217.626	173.272	217.502	1.30721e-29	1.58199e-13	1.94644e-29	1.91336e-13	1	67122500	67157500	0
chr11	13205000	13210000	chr11	13465000	13470000	.	.	.	.	255255	142	68.5694	68.8012	75.0494	75.2132	8.74059e-08	1.07187e-07	1.29653e-07	1.3086e-07	2	13210000	13467500	2500
chr11	50725000	50730000	chr11	50795000	50800000	.	.	.	.	255255	62	23.8328	23.631	29.1133	25.1853	1.53049e-06	2.41406e-06	0.0013896	0.00141179	1	50727500	50797500	0
chr11	94780000	94785000	chr11	95140000	95145000	.	.	.	.	255255	107	49.9874	46.9116	53.5534	56.3825	9.42874e-05	4.38405e-09	0.000139234	0.00014527	2	94785000	95140000	3536
chr11	111280000	111285000	chr11	111355000	111360000	.	.	.	.	255255	370	197.405	184.426	227.425	183.611	5.84759e-10	1.23683e-23	1.01716e-09	1.67792e-23	1	111282500	111357500	0
chr11	32320000	32325000	chr11	32790000	32795000	.	.	.	.	255255	207	46.291	39.1844	46.8659	51.0776	0	0	0	1.5857e-41	16	32323437	32793750	12597
chr11	95920000	95925000	chr11	96255000	96260000	.	.	.	.	255255	166	78.7432	89.5691	97.8614	83.1776	3.32321e-07	4.18944e-07	0.0249749	5.11108e-07	3	95924166	96244166	13438
chr11	102390000	102395000	chr11	102450000	102455000	.	.	.	.	255255	326	134.859	158.484	210.171	162.883	1.08337e-27	1.53191e-13	0.000481722	1.98027e-13	4	102395000	102455000	3536
chr11	45250000	45255000	chr11	45290000	45295000	.	.	.	.	255255	286	131.212	140.633	168.296	133.379	8.43218e-17	9.69463e-17	1.50713e-06	1.31206e-16	2	45255000	45292500	2500
chr11	54940000	54945000	chr11	55010000	55015000	.	.	.	.	255255	229	86.4174	115.339	116.32	122.849	1.03303e-24	1.22725e-13	1.65997e-13	1.9259e-05	4	54942500	55040000	27500
chr11	76325000	76330000	chr11	76675000	76680000	.	.	.	.	255255	147	63.7531	70.6845	65.791	81.4321	5.52569e-09	6.60036e-09	8.22543e-09	0.00107185	1	76327500	76677500	0
chr11	131805000	131810000	chr11	131855000	131860000	.	.	.	.	255255	339	151.366	168.145	161.186	190.019	1.03095e-31	2.87255e-16	3.60165e-16	3.78505e-16	1	131807500	131857500	0
chr11	63765000	63770000	chr11	64145000	64150000	.	.	.	.	255255	117	36.9178	34.3176	35.9095	43.7386	4.2291e-19	4.93432e-19	6.37263e-19	3.06963e-12	5	63766500	64146500	11705
chr11	86455000	86460000	chr11	86605000	86610000	.	.	.	.	255255	454	113.942	101.3	123.071	104.242	0	0	0	0	10	86455500	86608500	17889
chr11	69105000	69110000	chr11	69640000	69645000	.	.	.	.	255255	273	61.4312	67.9602	89.3342	80.3193	0	0	1.5627e-41	1.5668e-41	23	69103369	69646630	16920
chr11	33160000	33165000	chr11	33690000	33695000	.	.	.	.	255255	150	78.4463	74.7339	92.1598	83.1651	0.000247812	1.13633e-09	0.000371458	0.000376802	4	33167500	33687500	7071
chr11	82900000	82905000	chr11	83250000	83255000	.	.	.	.	255255	364	116.451	149.412	192.37	188.066	0	4.59388e-40	5.23861e-22	5.49381e-22	9	82909166	83248055	12596
chr11	1850000	1855000	chr11	2385000	2390000	.	.	.	.	255255	69	25.878	24.9441	26.3857	30.3391	1.10234e-05	1.63765e-05	1.71695e-05	1.76291e-05	2	1852500	2385000	2500
chr11	54905000	54910000	chr11	55435000	55440000	.	.	.	.	255255	59	20.3225	24.6138	24.9211	21.7645	1.60905e-05	0.00693672	0.00666013	2.64774e-05	1	54907500	55437500	0
chr11	30040000	30045000	chr11	30075000	30080000	.	.	.	.	255255	171	70.1564	80.6405	74.4577	91.9778	8.93909e-16	3.69336e-08	1.30567e-15	4.63944e-08	3	30035833	30082500	14240
chr11	14530000	14540000	chr11	15000000	15010000	.	.	.	.	255255	223	121.859	102.599	131.751	98.8447	7.36667e-12	1.09411e-11	0.000290973	1.48803e-11	1	14535000	15005000	0
chr11	100455000	100460000	chr11	100505000	100510000	.	.	.	.	255255	72	11.0876	21.8551	29.6244	29.6323	7.4752e-26	2.7196e-10	1.98215e-06	2.06705e-06	1	100457500	100507500	0
chr11	76810000	76815000	chr11	76915000	76920000	.	.	.	.	255255	621	173.277	167.313	199.779	206.456	0	0	0	0	16	76810312	76916562	18609
chr11	120170000	120175000	chr11	120300000	120305000	.	.	.	.	255255	462	107.117	96.1758	112.293	134.038	0	0	0	0	15	120174500	120301500	14142
chr11	54650000	54655000	chr11	54685000	54690000	.	.	.	.	255255	137	62.2715	60.3224	61.0917	71.7455	1.15319e-06	1.35588e-12	1.80507e-12	1.7246e-06	2	54655000	54690000	3536
chr11	78225000	78230000	chr11	78560000	78565000	.	.	.	.	255255	406	67.0608	78.1551	99.7303	100.254	0	0	0	0	16	78227500	78563125	11743
chr11	26755000	26760000	chr11	27305000	27310000	.	.	.	.	255255	78	37.9421	38.8402	43.4882	37.0272	4.92361e-05	7.04985e-05	0.0305531	7.81314e-05	2	26757500	27300000	7500
chr11	14535000	14540000	chr11	15075000	15080000	.	.	.	.	255255	69	33.0106	30.8683	37.371	30.5096	0.00508857	1.63765e-05	0.00785971	1.76291e-05	1	14537500	15077500	0
chr11	124070000	124075000	chr11	124585000	124590000	.	.	.	.	255255	146	41.7438	42.8533	48.7853	53.1034	5.38779e-24	5.64681e-24	7.82804e-24	2.00014e-15	6	124072500	124589166	16667
chr11	33360000	33370000	chr11	33540000	33550000	.	.	.	.	255255	855	449.671	395.938	494.449	403.493	1.4803e-41	1.5096e-41	9.30401e-14	2.174e-41	5	33365000	33537000	12806
chr11	11795000	11800000	chr11	11965000	11970000	.	.	.	.	255255	274	113.935	99.2374	127.251	103.227	1.46084e-26	1.44883e-26	8.2717e-14	2.30603e-26	5	11799500	11964500	7616
chr11	111875000	111880000	chr11	112080000	112085000	.	.	.	.	255255	297	152.844	140.937	170.566	154.318	1.46138e-19	1.63341e-19	3.2468e-08	3.31095e-08	9	111879166	112081944	11560
chr11	94970000	94980000	chr11	95140000	95150000	.	.	.	.	255255	561	302.289	261.028	305.86	323.255	3.95725e-31	3.98514e-31	1.59147e-11	1.62645e-11	5	94977000	95141000	12649
chr11	107865000	107870000	chr11	108155000	108160000	.	.	.	.	255255	108	50.8973	55.7412	54.1355	56.0044	5.88152e-05	7.90471e-05	8.72866e-05	9.09346e-05	1	107867500	108157500	0
chr11	17595000	17600000	chr11	17975000	17980000	.	.	.	.	255255	246	81.9528	75.7274	85.2323	99.715	7.35835e-31	0	1.17123e-30	6.08903e-18	11	17599772	17977500	12728
chr11	11400000	11405000	chr11	11785000	11790000	.	.	.	.	255255	218	80.6384	80.5358	84.9661	93.2949	4.98953e-21	5.05227e-21	7.80901e-21	7.95612e-21	2	11402500	11785000	2500
chr11	60265000	60270000	chr11	60345000	60350000	.	.	.	.	255255	334	143.537	126.268	165.322	129.149	3.86438e-30	3.97043e-30	4.25952e-15	5.98879e-30	14	60267857	60346071	16433
chr11	103030000	103040000	chr11	103600000	103610000	.	.	.	.	255255	137	58.8723	63.6373	66.1081	76.1348	3.04129e-12	5.23314e-06	6.10052e-06	5.98309e-06	1	103035000	103605000	0
chr11	14905000	14910000	chr11	15205000	15210000	.	.	.	.	255255	99	41.824	34.8252	35.6598	38.6612	7.23779e-07	1.32646e-11	1.65447e-11	1.73458e-11	6	14910000	15212500	5590
chr11	33840000	33845000	chr11	34490000	34495000	.	.	.	.	255255	111	55.2295	50.6606	51.7131	60.9411	1.3518e-05	1.76627e-05	1.99594e-05	2.09107e-05	2	33845000	34497500	5590
chr11	113955000	113960000	chr11	114005000	114010000	.	.	.	.	255255	133	20.849	40.3358	50.5603	47.563	0	2.0194e-18	3.18855e-11	2.808e-18	1	113957500	114007500	0
chr11	5690000	5700000	chr11	6230000	6240000	.	.	.	.	255255	232	101.741	115.24	109.485	132.427	4.97772e-14	7.21635e-14	9.60427e-14	1.63111e-05	1	5695000	6235000	0
chr11	64845000	64850000	chr11	65110000	65115000	.	.	.	.	255255	308	132.39	134.805	162.695	152.037	1.66437e-22	1.81658e-22	4.63104e-10	2.58984e-22	7	64849642	65116071	7987
chr11	109950000	109955000	chr11	110025000	110030000	.	.	.	.	255255	775	358.74	323.143	480.804	349.968	0	0	2.11083e-25	0	8	109955000	110028750	13050
chr11	9530000	9535000	chr11	9610000	9615000	.	.	.	.	255255	507	190.756	192.571	238.121	243.161	0	0	4.969e-41	1.85145e-19	9	9529722	9609722	17445
chr11	131245000	131250000	chr11	131670000	131675000	.	.	.	.	255255	81	35.5914	36.7232	38.1527	45.7591	7.90315e-06	1.09363e-05	1.20877e-05	0.010488	2	131245000	131672500	2500
chr11	63030000	63040000	chr11	63210000	63220000	.	.	.	.	255255	552	167.97	170.626	171.487	196.019	0	0	0	0	6	63036666	63213333	11785
chr11	73400000	73405000	chr11	73660000	73665000	.	.	.	.	255255	431	191.716	170.927	175.042	225.599	2.1087e-41	2.2617e-41	3.0844e-41	2.48879e-21	11	73403863	73657954	15876
chr11	1265000	1270000	chr11	1425000	1430000	.	.	.	.	255255	146	69.9008	77.0585	83.8622	92.6938	9.71216e-09	1.16528e-08	0.00147183	0.00149552	1	1267500	1427500	0
chr11	18540000	18545000	chr11	18730000	18735000	.	.	.	.	255255	277	100.165	98.3268	112.869	102.866	1.53309e-27	1.4997e-27	2.35948e-27	2.41546e-27	10	18540000	18731500	8500
chr11	94170000	94175000	chr11	94495000	94500000	.	.	.	.	255255	263	91.0028	122.271	134.75	153.379	1.56204e-37	1.51495e-11	1.92335e-11	0.00117914	20	94177000	94501500	14534
chr11	61195000	61200000	chr11	61265000	61270000	.	.	.	.	255255	198	31.4168	46.1033	59.9185	36.0017	0	0	4.02596e-37	0	9	61193055	61265277	12790
chr11	1695000	1700000	chr11	2150000	2155000	.	.	.	.	255255	265	86.6426	93.4542	93.9287	125.015	2.3976e-38	2.16288e-38	3.94996e-38	7.49322e-12	5	1698500	2153500	9055
chr11	58575000	58580000	chr11	59140000	59145000	.	.	.	.	255255	147	71.2938	62.5717	83.0736	69.8957	5.52569e-09	6.60036e-09	0.00105516	8.27632e-09	1	58577500	59142500	0
chr11	11025000	11030000	chr11	11265000	11270000	.	.	.	.	255255	261	124.181	107.445	117.995	122.198	3.13438e-11	1.79163e-22	2.73405e-22	4.98442e-11	17	11035147	11265441	17263
chr11	112585000	112590000	chr11	112795000	112800000	.	.	.	.	255255	415	116.074	108.886	135.548	128.073	0	0	0	0	11	112588863	112793409	11399
chr11	47855000	47860000	chr11	48105000	48110000	.	.	.	.	255255	368	120.375	100.205	108.798	111.422	0	0	0	0	12	47858750	48104166	19044
chr11	62420000	62425000	chr11	62860000	62865000	.	.	.	.	255255	118	43.4691	59.42	66.0385	69.1577	9.0143e-13	3.83111e-07	0.00491609	0.00500635	1	62422500	62862500	0
chr11	34175000	34180000	chr11	34240000	34245000	.	.	.	.	255255	609	260.139	273.186	308.451	322.789	0	0	4.2513e-19	4.16109e-19	12	34182500	34236250	15462
chr11	10620000	10625000	chr11	10670000	10675000	.	.	.	.	255255	161	20.4361	42.0904	53.6974	52.4199	0	5.13362e-31	5.75183e-21	6.0485e-21	1	10622500	10672500	0
chr11	54585000	54590000	chr11	54995000	55000000	.	.	.	.	255255	50	13.8872	17.9132	22.8946	20.1819	5.97037e-08	7.03661e-05	0.00871669	0.00874444	1	54587500	54997500	0
chr11	118195000	118200000	chr11	118350000	118355000	.	.	.	.	255255	511	107.573	113.596	148.12	136.35	0	0	0	0	20	118198250	118350000	13108
chr11	42815000	42820000	chr11	42865000	42870000	.	.	.	.	255255	153	25.3067	48.8024	58.9669	55.0766	0	3.58851e-27	6.02264e-18	6.40256e-18	1	42817500	42867500	0
chr11	20155000	20160000	chr11	20600000	20605000	.	.	.	.	255255	146	45.7285	57.9758	48.6349	83.2211	5.38779e-24	1.34084e-15	7.82804e-24	0.00149552	1	20157500	20602500	0
chr11	110095000	110100000	chr11	110370000	110375000	.	.	.	.	255255	177	80.9113	86.7329	95.6525	97.9278	1.37843e-09	1.64462e-09	2.08373e-09	0.00131306	4	110092500	110370000	13463
chr11	108000000	108005000	chr11	108650000	108655000	.	.	.	.	255255	106	53.6906	47.3744	52.9306	57.2878	0.000149485	8.88343e-09	0.000221188	0.000229462	7	108006071	108653214	7727
chr11	112285000	112290000	chr11	112580000	112585000	.	.	.	.	255255	210	114.992	90.3208	131.4	86.0085	2.09812e-09	1.73803e-18	0.00484809	2.63618e-18	8	112290625	112573125	17071
chr11	11020000	11030000	chr11	12280000	12290000	.	.	.	.	255255	219	119.693	108.535	105.36	124.443	5.98104e-11	9.01865e-11	1.15268e-10	0.000958509	5	11033000	12279000	14142
chr11	9015000	9020000	chr11	9135000	9140000	.	.	.	.	255255	614	188.792	183.048	194.008	229.668	0	0	0	0	15	9016166	9139500	14461
chr11	120330000	120335000	chr11	120680000	120685000	.	.	.	.	255255	144	60.8594	62.3429	78.872	61.3543	6.04715e-15	3.58848e-08	0.00281572	9.73275e-15	5	120330500	120690500	12166
chr11	76810000	76815000	chr11	77035000	77040000	.	.	.	.	255255	243	113.191	116.821	137.757	126.813	2.59712e-17	2.81907e-17	1.14324e-07	1.17155e-07	7	76812500	77042500	7071
chr11	94170000	94175000	chr11	94415000	94420000	.	.	.	.	255255	204	94.069	97.5998	112.931	99.1969	1.06155e-16	4.18393e-08	5.09454e-08	5.19984e-08	1	94172500	94417500	0
chr11	18540000	18545000	chr11	18650000	18655000	.	.	.	.	255255	372	90.3185	87.6587	94.1271	97.2766	0	0	0	0	17	18539852	18648382	16462
chr11	68005000	68010000	chr11	68205000	68210000	.	.	.	.	255255	247	99.8273	79.5864	86.633	107.029	2.05588e-18	2.90672e-31	4.91786e-31	3.21003e-18	2	68010000	68207500	2500
chr11	95835000	95840000	chr11	96340000	96345000	.	.	.	.	255255	171	53.8505	73.0553	88.2035	74.1773	3.46295e-25	9.48321e-16	4.5357e-08	1.34458e-15	2	95845000	96342500	7500
chr11	33995000	34000000	chr11	34240000	34245000	.	.	.	.	255255	168	82.391	83.4535	102.25	77.8498	1.29763e-07	1.61886e-07	0.0153615	1.99535e-07	4	33997500	34250000	12500
chr11	121320000	121325000	chr11	121425000	121430000	.	.	.	.	255255	791	355.563	376.34	505.715	399.777	0	0	1.30984e-06	3.07622e-28	7	121326785	121443214	16288
chr11	37930000	37935000	chr11	37980000	37985000	.	.	.	.	255255	113	21.6302	34.5196	37.8631	42.9437	8.02106e-33	2.85204e-17	3.65488e-17	6.99546e-11	1	37932500	37982500	0
chr11	74925000	74930000	chr11	75025000	75030000	.	.	.	.	255255	404	217.225	185.601	213.146	176.327	6.58076e-16	5.10616e-33	1.1104e-15	7.2695e-33	16	74931250	75025937	18732
chr11	1695000	1700000	chr11	47300000	47305000	.	.	.	.	255255	19	0.485146	0.505242	0.417521	0.181244	2.02958e-10	7.6738e-10	4.52255e-10	4.34457e-10	1	1697500	47302500	0
chr11	60455000	60460000	chr11	60760000	60765000	.	.	.	.	255255	221	87.3428	75.4434	69.6574	109.972	5.22265e-22	1.33315e-34	2.25274e-34	1.31348e-11	2	60450000	60762500	7500
chr11	93735000	93740000	chr11	93785000	93790000	.	.	.	.	255255	667	338.671	322.987	311.91	369.414	1.86509e-30	2.37654e-30	2.65165e-30	2.58194e-30	12	93739583	93787500	12254
chr11	43570000	43575000	chr11	43850000	43855000	.	.	.	.	255255	337	157.021	142.67	151.28	184.919	6.15395e-16	4.53048e-31	6.72846e-31	1.02605e-15	9	43574722	43851388	12272
chr11	42520000	42525000	chr11	43280000	43285000	.	.	.	.	255255	75	32.9026	25.9517	21.9131	35.1567	0.000266148	1.84664e-07	1.56017e-11	0.000422453	2	42525000	43282500	2500
chr11	113895000	113900000	chr11	114260000	114265000	.	.	.	.	255255	242	75.0939	56.7816	68.1919	63.1988	0	0	0	0	12	113898750	114259166	12254
chr11	122630000	122635000	chr11	122850000	122855000	.	.	.	.	255255	224	80.088	82.7056	86.8804	104.912	5.24288e-23	5.20913e-23	8.22256e-23	2.6399e-12	8	122634375	122854375	8339
chr11	10790000	10795000	chr11	11020000	11025000	.	.	.	.	255255	448	69.7658	70.1427	97.1673	103.188	0	0	0	0	24	10790416	11021041	20419
chr11	75895000	75900000	chr11	76150000	76155000	.	.	.	.	255255	494	130.48	112.913	163.44	132.5	0	0	0	0	20	75897000	76146500	15042
chr11	85050000	85055000	chr11	85170000	85175000	.	.	.	.	255255	112	53.865	56.9823	58.8058	57.5322	8.10571e-06	1.04902e-05	1.1971e-05	1.25436e-05	1	85052500	85172500	0
chr11	85855000	85860000	chr11	86455000	86460000	.	.	.	.	255255	155	69.8333	62.4053	70.9347	59.6125	4.59176e-11	5.2629e-11	6.78261e-11	1.16434e-18	3	85855833	86450833	13437
chr11	69910000	69915000	chr11	70195000	70200000	.	.	.	.	255255	351	110.129	83.7986	96.6712	108.145	0	0	0	0	20	69917500	70194000	15403
chr11	61195000	61200000	chr11	61385000	61390000	.	.	.	.	255255	123	14.41	41.9354	67.9171	45.3513	0	1.55115e-14	0.000812851	2.14908e-14	3	61194166	61389166	3727
chr11	12600000	12605000	chr11	12885000	12890000	.	.	.	.	255255	363	85.735	92.4265	104.407	120.605	0	0	0	0	21	12600119	12889880	14742
chr11	20645000	20650000	chr11	21510000	21515000	.	.	.	.	255255	164	25.1922	22.7058	27.2273	29.5454	0	0	0	0	10	20648500	21513000	11011
chr11	47785000	47790000	chr11	48105000	48110000	.	.	.	.	255255	156	63.0666	63.4314	61.3839	79.7513	2.44449e-11	2.78998e-11	4.61767e-19	3.86715e-05	10	47760000	48107500	47500
chr11	23110000	23120000	chr11	26220000	26230000	.	.	.	.	255255	112	41.5883	48.1214	58.5328	48.0853	1.87692e-10	4.33127e-10	3.9588e-05	4.64914e-10	1	23115000	26225000	0
chr11	55735000	55740000	chr11	56765000	56770000	.	.	.	.	255255	39	16.8466	15.5551	15.2276	15.0082	0.0439802	0.00311882	0.00259917	0.00260043	2	55730000	56772500	9014
chr11	83290000	83295000	chr11	83725000	83730000	.	.	.	.	255255	202	104.067	92.991	105.358	104.09	8.00155e-08	4.39595e-16	1.23022e-07	1.25937e-07	7	83298214	83719642	12876
chr11	96460000	96465000	chr11	97140000	97145000	.	.	.	.	255255	184	45.1784	37.2404	47.6761	41.199	0	0	0	0	13	96466346	97142500	12223
chr11	840000	845000	chr11	1050000	1055000	.	.	.	.	255255	278	123.885	86.6507	75.3613	137.319	6.56252e-15	0	0	1.03274e-14	12	852500	1050416	10416
chr11	11795000	11800000	chr11	12045000	12050000	.	.	.	.	255255	256	83.242	71.0304	85.5389	76.9781	1.01788e-34	0	1.6438e-34	0	16	11800312	12039375	13993
chr11	109940000	109945000	chr11	111225000	111230000	.	.	.	.	255255	73	18.8647	22.5872	26.1534	24.1482	1.30619e-15	1.00533e-10	9.40448e-07	1.10054e-10	1	109942500	111227500	0
chr11	57345000	57350000	chr11	57640000	57645000	.	.	.	.	255255	234	66.8834	61.5336	69.3953	75.144	2.49483e-40	2.30762e-40	4.1826e-40	4.42537e-40	15	57345500	57642833	16200
chr11	30390000	30395000	chr11	30505000	30510000	.	.	.	.	255255	102	47.5971	50.7003	52.5827	47.7563	1.08783e-07	0.00120059	0.00125705	1.68836e-07	1	30392500	30507500	0
chr11	76740000	76745000	chr11	76915000	76920000	.	.	.	.	255255	171	77.4063	84.2991	88.0616	99.9076	3.0141e-08	3.69336e-08	4.5357e-08	0.00721401	6	76735833	76917500	10541
chr11	33995000	34000000	chr11	34360000	34365000	.	.	.	.	255255	372	73.4494	82.9333	92.1286	110.47	0	0	0	0	17	33994852	34359264	17651
chr11	2425000	2430000	chr11	2885000	2890000	.	.	.	.	255255	166	47.581	42.2489	48.6294	49.9369	1.70417e-33	1.70712e-33	2.41702e-33	6.24849e-23	11	2428409	2887954	12008
chr11	1900000	1905000	chr11	2075000	2080000	.	.	.	.	255255	113	43.4026	58.3409	64.9595	63.0211	4.52859e-11	6.18008e-06	0.0237613	0.0241489	2	1902500	2085000	7500
chr11	9750000	9755000	chr11	10300000	10305000	.	.	.	.	255255	262	103.442	100.25	103.098	123.41	8.64557e-23	8.85247e-23	1.35357e-22	3.12091e-11	11	9754318	10312500	17086
chr11	54800000	54810000	chr11	55730000	55740000	.	.	.	.	255255	151	71.9369	78.6777	81.8523	95.4216	1.3736e-09	0.000690845	0.000757111	0.000761283	1	54805000	55735000	0
chr11	65275000	65280000	chr11	65510000	65515000	.	.	.	.	255255	222	72.168	87.2969	87.2615	127.038	5.27476e-35	2.43717e-22	3.83473e-22	0.000179761	4	65276250	65511250	13807
chr11	83070000	83075000	chr11	83155000	83160000	.	.	.	.	255255	779	301.204	312.709	356.713	293.268	0	0	0	0	12	83074583	83164583	36119
chr11	124635000	124640000	chr11	124670000	124675000	.	.	.	.	255255	249	124.331	132.649	138.254	117.311	6.30329e-09	8.14057e-09	1.00273e-08	8.83532e-19	1	124637500	124672500	0
chr11	54750000	54755000	chr11	54995000	55000000	.	.	.	.	255255	103	44.6441	44.3677	48.3358	54.549	5.63596e-08	6.93189e-08	8.17618e-08	0.000859544	1	54752500	54997500	0
chr11	70465000	70470000	chr11	70755000	70760000	.	.	.	.	255255	208	63.0426	60.5923	65.4977	79.8619	3.74415e-29	0	5.73693e-29	1.07091e-17	8	70466250	70754375	9291
chr11	44555000	44560000	chr11	44770000	44775000	.	.	.	.	255255	154	48.7452	64.9285	71.9658	75.2282	1.15859e-27	9.85682e-11	1.26722e-10	1.28774e-10	6	44555833	44777500	8333
chr11	19950000	19955000	chr11	20105000	20110000	.	.	.	.	255255	410	138.614	148.281	181.374	169.25	0	0	1.11464e-34	1.18694e-34	4	19947500	20110000	10308
chr11	23540000	23545000	chr11	26225000	26230000	.	.	.	.	255255	66	15.0159	16.7262	19.6557	17.7746	1.51978e-16	1.04035e-11	8.42182e-08	1.1921e-11	5	23540500	26225500	8246
chr11	34365000	34370000	chr11	34490000	34495000	.	.	.	.	255255	522	151.66	118.115	159.485	141.4	0	0	0	0	24	34370625	34485000	23125
chr11	128170000	128175000	chr11	128285000	128290000	.	.	.	.	255255	305	168.616	122.958	148.963	111.406	9.24928e-10	1.20533e-21	1.67291e-21	3.71312e-37	7	128176785	128283214	8082
chr11	48780000	48785000	chr11	48875000	48880000	.	.	.	.	255255	92	31.1462	39.6551	32.8652	37.6201	3.29262e-09	5.60372e-05	5.00294e-09	5.17019e-09	1	48782500	48877500	0
chr11	124415000	124420000	chr11	124585000	124590000	.	.	.	.	255255	409	78.6967	74.2245	88.7817	88.1596	0	0	0	0	24	124412916	124585000	19208
chr11	5690000	5700000	chr11	7520000	7530000	.	.	.	.	255255	86	31.0916	36.9987	44.3128	38.6289	4.85795e-07	1.13952e-06	0.00354548	1.15023e-06	2	5695000	7520000	5000
chr11	72720000	72730000	chr11	73170000	73180000	.	.	.	.	255255	645	248.235	263.843	308.861	300.238	0	0	1.07947e-25	0	9	72729444	73168333	28043
chr11	128285000	128290000	chr11	128555000	128560000	.	.	.	.	255255	282	142.68	115.781	176.169	97.5088	7.6418e-16	3.20196e-29	5.46683e-06	5.22987e-29	4	128290000	128555000	3536
chr11	86940000	86945000	chr11	87285000	87290000	.	.	.	.	255255	397	112.614	115.512	122.318	184.208	0	0	0	7.88576e-31	12	86938333	87288333	14767
chr11	660000	665000	chr11	725000	730000	.	.	.	.	255255	344	112.545	143.453	174.708	180.732	0	2.60308e-33	2.84985e-17	2.97911e-17	2	662500	725000	2500
chr11	60770000	60775000	chr11	61130000	61135000	.	.	.	.	255255	192	97.584	87.003	112.074	89.4237	4.83988e-06	2.80526e-13	7.43399e-06	3.8828e-13	4	60775000	61131250	13050
chr11	117840000	117845000	chr11	118050000	118055000	.	.	.	.	255255	616	124.261	180.807	190.292	263.053	0	0	0	0	23	117836847	118053586	20282
chr11	17595000	17600000	chr11	17730000	17735000	.	.	.	.	255255	261	121.742	117.273	144.592	118.449	1.73952e-22	1.79163e-22	4.92357e-11	2.74054e-22	4	17596250	17725000	9100
chr11	77190000	77200000	chr11	77610000	77620000	.	.	.	.	255255	480	271.765	222.701	287.276	224.956	1.43048e-14	2.37123e-33	2.09131e-14	3.90928e-33	2	77195000	77620000	5000
chr11	73185000	73190000	chr11	73235000	73240000	.	.	.	.	255255	764	285.029	293.987	376.303	362.225	0	0	0	0	17	73187500	73236029	19192
chr11	25980000	25985000	chr11	26130000	26135000	.	.	.	.	255255	362	92.8183	94.03	115.134	106.163	0	0	0	0	15	25984500	26133833	12074
chr11	83835000	83840000	chr11	84555000	84560000	.	.	.	.	255255	142	64.7721	57.2742	86.5781	53.1241	8.74059e-08	3.10535e-14	0.00523531	4.58009e-14	8	83835000	84563750	8385
chr11	57580000	57585000	chr11	57800000	57805000	.	.	.	.	255255	186	72.9892	100.493	102.273	109.888	8.39556e-21	5.91946e-05	6.7766e-05	6.96111e-05	1	57582500	57802500	0
chr11	72585000	72590000	chr11	72645000	72650000	.	.	.	.	255255	669	265.764	301.055	352.095	374.551	0	0	9.96698e-31	9.68433e-31	16	72588437	72644062	19370
chr11	85590000	85595000	chr11	85855000	85860000	.	.	.	.	255255	120	68.3417	52.7243	72.0417	48.8074	0.00170085	1.17942e-07	0.00246053	2.67314e-13	1	85592500	85857500	0
chr11	33360000	33370000	chr11	33740000	33750000	.	.	.	.	255255	780	301.797	287.747	439.171	266.959	0	0	2.70573e-26	0	1	33365000	33745000	0
chr11	61795000	61800000	chr11	61895000	61900000	.	.	.	.	255255	285	151.828	127.916	179.687	114.492	1.46888e-16	1.69822e-16	2.0896e-06	5.01116e-30	2	61802500	61895000	5590
chr11	82490000	82500000	chr11	87140000	87150000	.	.	.	.	255255	35	12.0227	11.5009	11.766	11.5517	0.00066198	0.00207914	0.00206984	0.00185081	1	82495000	87145000	0
chr11	47175000	47180000	chr11	47260000	47265000	.	.	.	.	255255	372	133.255	114.922	139.984	129.055	0	0	0	0	14	47178214	47261071	15779
chr11	60365000	60370000	chr11	60455000	60460000	.	.	.	.	255255	757	272.88	297.136	427.082	334.359	0	0	2.82758e-22	0	1	60367500	60457500	0
chr11	22330000	22335000	chr11	22730000	22735000	.	.	.	.	255255	141	45.1257	48.1903	69.8004	54.2229	8.57153e-22	8.98285e-22	2.20566e-07	9.91584e-14	5	22333500	22730500	6325
chr11	133135000	133140000	chr11	133825000	133830000	.	.	.	.	255255	222	68.1156	76.9209	85.275	102.661	5.27476e-35	4.93639e-35	3.83473e-22	7.72104e-12	12	133134166	133827916	10548
chr11	35610000	35615000	chr11	36470000	36475000	.	.	.	.	255255	78	36.4493	40.1961	46.6583	42.8247	4.92361e-05	0.031392	0.0305531	0.0314616	2	35615000	36475000	3536
chr11	18775000	18780000	chr11	18850000	18855000	.	.	.	.	255255	296	156.492	142.365	166.797	159.905	2.7809e-08	2.97082e-19	4.68433e-08	4.76675e-08	4	18775000	18855000	3536
chr11	72105000	72110000	chr11	72430000	72435000	.	.	.	.	255255	141	68.4553	60.0377	50.9447	84.1637	1.48714e-07	6.73733e-14	9.16118e-14	0.0071815	2	72102500	72432500	5000
chr11	5630000	5635000	chr11	5685000	5690000	.	.	.	.	255255	417	203.964	219.487	251.283	236.877	1.62548e-18	2.11551e-18	9.39897e-06	2.58787e-18	16	5624062	5692812	26089
chr11	50465000	50470000	chr11	50540000	50545000	.	.	.	.	255255	217	92.9641	98.5497	83.073	126.141	1.05065e-20	8.04336e-11	1.6408e-20	0.000770104	2	50460000	50542500	7500
chr11	50380000	50385000	chr11	50465000	50470000	.	.	.	.	255255	132	53.5819	44.2493	74.6233	27.4014	4.27142e-11	5.13341e-18	1.85989e-05	3.73446e-35	3	50385833	50460833	13437
chr11	88550000	88555000	chr11	88885000	88890000	.	.	.	.	255255	120	44.1915	34.2346	32.191	43.3241	1.75774e-13	2.10639e-20	2.75581e-20	2.67314e-13	6	88556666	88888333	10866
chr11	18395000	18400000	chr11	18635000	18640000	.	.	.	.	255255	133	62.7604	69.7397	70.5247	69.4924	7.94005e-06	1.03021e-05	1.16968e-05	1.18594e-05	2	18397500	18635000	2500
chr11	48875000	48880000	chr11	48960000	48965000	.	.	.	.	255255	52	23.7481	23.0509	15.059	24.5005	0.00178	0.00304368	1.6586e-08	0.00288741	1	48877500	48962500	0
chr11	60825000	60830000	chr11	61130000	61135000	.	.	.	.	255255	243	113.818	124.145	151.799	131.242	2.59712e-17	9.4705e-08	1.14324e-07	1.17155e-07	3	60829166	61127500	5270
chr11	48670000	48675000	chr11	54980000	54985000	.	.	.	.	255255	403	3.75812	4.26717	5.43515	4.819	0	0	0	0	1	48672500	54982500	0
chr11	129990000	129995000	chr11	130130000	130135000	.	.	.	.	255255	369	162.587	167.049	145.468	214.94	1.88375e-23	2.22833e-23	1.1578e-41	1.41814e-09	3	129999166	130127500	10541
chr11	82900000	82905000	chr11	83285000	83290000	.	.	.	.	255255	312	154.686	131.765	177.202	138.846	5.45892e-11	1.38965e-23	8.93994e-11	1.997e-23	3	82902500	83287500	5000
chr11	9960000	9965000	chr11	10300000	10305000	.	.	.	.	255255	236	103.711	119.432	121.15	129.477	1.85255e-15	2.07641e-15	2.87794e-15	1.67488e-06	7	9971071	10311071	12121
chr11	27695000	27700000	chr11	29160000	29165000	.	.	.	.	255255	104	29.5175	32.4415	38.7331	33.7882	5.96433e-20	1.57423e-13	1.97907e-13	2.08863e-13	7	27697500	29158928	6428
chr11	61795000	61800000	chr11	62105000	62110000	.	.	.	.	255255	265	104.358	100.692	128.944	117.37	1.03414e-23	1.05514e-23	7.389e-12	1.63684e-23	5	61799500	62108500	6325
chr11	79710000	79715000	chr11	81005000	81010000	.	.	.	.	255255	60	19.5243	21.1214	24.6536	21.6993	3.73171e-09	1.19274e-05	0.00403903	1.23525e-05	3	79707500	81007500	5000
chr11	97600000	97610000	chr11	99010000	99020000	.	.	.	.	255255	142	71.4477	65.4472	63.2325	77.1573	2.17028e-07	4.02475e-07	4.72615e-07	4.66009e-07	2	97610000	99015000	5000
chr11	89920000	89930000	chr11	92510000	92520000	.	.	.	.	255255	13	1.13141	1.25795	1.38668	1.48871	9.98085e-05	0.00249648	0.00321706	0.00246853	1	89925000	92515000	0
chr11	112585000	112590000	chr11	113285000	113290000	.	.	.	.	255255	217	54.6424	51.6924	59.9505	69.4619	0	0	0	1.17792e-32	17	112589558	113287500	16973
chr11	63835000	63840000	chr11	63945000	63950000	.	.	.	.	255255	474	171.499	174.515	255.367	186.669	0	0	1.48839e-13	0	4	63836250	63943750	6374
chr11	118905000	118910000	chr11	119100000	119105000	.	.	.	.	255255	179	96.4813	88.7914	112.318	91.4254	4.70868e-10	5.55939e-10	0.000694119	7.24789e-10	2	118915000	119100000	7906
chr11	68630000	68635000	chr11	68850000	68855000	.	.	.	.	255255	145	65.1436	82.0066	83.3899	89.718	1.70152e-08	0.00188878	0.00204247	0.00207428	2	68632500	68850000	2500
chr11	42390000	42395000	chr11	42445000	42450000	.	.	.	.	255255	117	46.2131	54.3484	73.4757	63.4623	2.01831e-12	6.81432e-07	0.00686491	0.00698854	1	42392500	42447500	0
chr11	86040000	86050000	chr11	86590000	86600000	.	.	.	.	255255	159	63.4983	77.9884	70.5281	95.8312	9.39593e-12	3.05767e-05	2.11076e-11	3.49067e-05	1	86045000	86595000	0
chr11	81950000	81960000	chr11	82010000	82020000	.	.	.	.	255255	414	156.421	210.043	238.129	225.442	9.75827e-36	1.37984e-17	1.8645e-17	1.94204e-17	1	81955000	82015000	0
chr11	68600000	68610000	chr11	69080000	69090000	.	.	.	.	255255	186	105.386	88.7127	82.6125	112.11	9.58512e-05	3.97873e-11	4.88719e-11	0.000190516	1	68605000	69085000	0
chr11	32810000	32815000	chr11	33060000	33065000	.	.	.	.	255255	227	108.469	102.943	111.25	124.353	3.27932e-13	3.79795e-13	5.09339e-13	3.73494e-05	3	32810833	33065833	3727
chr11	6755000	6760000	chr11	7690000	7695000	.	.	.	.	255255	104	47.6847	45.0494	37.9836	54.0375	2.89248e-08	3.54759e-08	1.97907e-13	0.000559582	1	6757500	7692500	0
chr11	68255000	68260000	chr11	68440000	68445000	.	.	.	.	255255	218	86.3911	94.4581	110.016	106.609	4.98953e-21	5.05227e-21	6.16565e-11	6.25925e-11	7	68256071	68447500	6429
chr11	29430000	29435000	chr11	30195000	30200000	.	.	.	.	255255	70	32.803	28.7355	38.6288	26.4382	0.00324621	8.05399e-06	0.00499756	8.74334e-06	1	29432500	30197500	0
chr11	55700000	55705000	chr11	55735000	55740000	.	.	.	.	255255	135	67.4385	76.1803	63.1146	75.881	3.06732e-06	3.94892e-06	4.54377e-06	4.59002e-06	5	55683500	55735500	20000
chr11	103920000	103925000	chr11	104330000	104335000	.	.	.	.	255255	82	36.0941	36.6182	42.273	45.7064	4.18016e-06	5.70774e-06	0.00681002	0.007081	2	103925000	104332500	2500
chr11	50300000	50305000	chr11	50415000	50420000	.	.	.	.	255255	67	26.1746	24.705	20.0248	33.9479	4.24141e-05	6.40284e-05	3.51431e-08	0.0184399	1	50302500	50417500	0
chr11	93920000	93925000	chr11	94495000	94500000	.	.	.	.	255255	121	35.0261	51.6532	50.1126	74.3026	6.34108e-21	6.44395e-08	7.81256e-08	0.00174465	1	93922500	94497500	0
chr11	19935000	19940000	chr11	20350000	20355000	.	.	.	.	255255	127	63.9642	59.0743	65.2244	74.9391	0.000112827	1.45681e-09	0.000164974	0.000167905	6	19945000	20347500	12500
chr11	32950000	32960000	chr11	33320000	33330000	.	.	.	.	255255	388	175.827	183.276	190.653	223.656	3.57063e-28	3.86556e-28	6.27364e-28	1.73769e-12	5	32957000	33331000	16125
chr11	63480000	63485000	chr11	63730000	63735000	.	.	.	.	255255	218	89.1643	92.9261	114.217	100.677	4.98953e-21	5.05227e-21	6.16565e-11	6.25925e-11	10	63478500	63738000	15042
chr11	69355000	69360000	chr11	69390000	69395000	.	.	.	.	255255	273	69.1804	133.962	55.4592	165.575	0	1.06707e-13	0	8.33448e-05	5	69352500	69393500	10770
chr11	4185000	4190000	chr11	4490000	4495000	.	.	.	.	255255	478	76.6696	84.437	126.195	82.8314	0	0	0	0	15	4191500	4489500	20000
chr11	31485000	31490000	chr11	31870000	31875000	.	.	.	.	255255	181	51.2862	53.7837	63.2548	54.6331	1.74229e-29	1.70895e-29	6.80544e-19	2.95657e-29	4	31488750	31872500	5154
chr11	73185000	73190000	chr11	73285000	73290000	.	.	.	.	255255	662	242.438	222.093	277.492	271.852	0	0	0	0	9	73189722	73288055	8959
chr11	7520000	7530000	chr11	8680000	8690000	.	.	.	.	255255	113	53.9542	49.2862	52.3876	53.8198	1.09928e-05	2.1915e-05	2.37065e-05	2.41784e-05	2	7520000	8685000	5000
chr11	124080000	124085000	chr11	124835000	124840000	.	.	.	.	255255	62	25.4961	26.0418	29.8417	29.4265	0.000881755	0.00140834	0.0013896	0.00141179	2	124082500	124835000	2500
chr11	72970000	72975000	chr11	73135000	73140000	.	.	.	.	255255	300	145.088	166.113	166.411	189.689	2.39139e-20	8.73152e-09	1.05743e-08	1.08175e-08	2	72972500	73132500	5000
chr11	6315000	6320000	chr11	6350000	6355000	.	.	.	.	255255	403	196.801	218.009	218.326	228.002	1.02691e-15	1.38014e-15	1.73477e-15	1.66421e-15	3	6309166	6355833	13437
chr11	86935000	86940000	chr11	87420000	87425000	.	.	.	.	255255	317	88.1409	89.5838	103.578	108.99	0	0	8.772e-42	8.916e-42	10	86939000	87421000	8631
chr11	39900000	39905000	chr11	39950000	39955000	.	.	.	.	255255	94	17.5963	31.1595	37.5764	38.6645	2.85435e-28	8.56785e-10	1.03514e-09	1.06275e-09	1	39902500	39952500	0
chr11	10790000	10795000	chr11	11785000	11790000	.	.	.	.	255255	111	23.545	30.4796	37.5038	37.7498	1.48759e-31	2.20538e-23	2.64705e-16	2.79151e-16	3	10790833	11785833	3727
chr11	74455000	74460000	chr11	74505000	74510000	.	.	.	.	255255	181	18.8929	38.4663	61.5125	45.28	0	0	6.80544e-19	2.8567e-41	2	74462500	74507500	5000
chr11	119065000	119070000	chr11	119320000	119325000	.	.	.	.	255255	179	96.6043	79.5341	80.4937	103.097	4.70868e-10	5.55939e-10	7.14801e-10	0.00071176	1	119067500	119322500	0
chr11	47175000	47180000	chr11	47420000	47425000	.	.	.	.	255255	168	78.522	63.6559	85.3383	65.2375	1.29763e-07	8.3131e-15	1.95433e-07	1.16565e-14	5	47178500	47413500	9055
chr11	85855000	85860000	chr11	86290000	86295000	.	.	.	.	255255	255	70.9365	83.739	112.04	89.1305	0	2.3285e-34	1.67922e-20	4.11513e-34	7	85855357	86291785	7889
chr11	29340000	29345000	chr11	30910000	30915000	.	.	.	.	255255	57	23.3885	20.8672	24.2278	22.2356	6.99398e-05	0.000113268	0.000112159	0.00011514	4	29342500	30916250	5154
chr11	30125000	30130000	chr11	30315000	30320000	.	.	.	.	255255	209	88.3353	78.6308	97.4025	74.3123	3.38223e-18	3.52905e-18	5.16483e-09	2.37861e-29	5	30129500	30326500	14142
chr11	57345000	57350000	chr11	57565000	57570000	.	.	.	.	255255	138	54.5661	54.0543	73.5525	48.0809	5.8604e-13	6.45527e-13	1.03676e-06	2.37293e-20	1	57347500	57567500	0
chr11	32750000	32755000	chr11	32790000	32795000	.	.	.	.	255255	569	142.21	147.92	183.086	178.807	0	0	0	0	8	32751250	32794375	13184
chr11	50480000	50485000	chr11	50655000	50660000	.	.	.	.	255255	136	59.3815	73.126	84.7274	87.9125	2.52837e-12	2.41621e-06	0.0283651	0.028772	10	50463500	50662500	25612
chr11	115330000	115335000	chr11	116085000	116090000	.	.	.	.	255255	149	59.6353	61.5871	74.3141	70.9379	1.12105e-16	2.06109e-09	2.59333e-09	2.60326e-09	6	115335833	116081666	7862
chr11	12045000	12050000	chr11	12280000	12285000	.	.	.	.	255255	1014	204.368	152.431	196.284	192.199	0	0	0	0	19	12052500	12280921	17202
chr11	123300000	123305000	chr11	123475000	123480000	.	.	.	.	255255	843	199.308	206.364	265.196	240.282	0	0	0	0	13	123301730	123476346	10832
chr11	60835000	60840000	chr11	61180000	61185000	.	.	.	.	255255	228	81.93	79.6268	110.223	101.566	2.29055e-24	2.24971e-24	2.91669e-13	2.92796e-13	11	60832500	61187500	11180
chr11	22875000	22880000	chr11	26275000	26280000	.	.	.	.	255255	50	19.872	15.5888	19.0582	17.455	0.00547042	7.03661e-05	6.74791e-05	7.10767e-05	1	22877500	26277500	0
chr11	17225000	17230000	chr11	17525000	17530000	.	.	.	.	255255	199	76.9957	61.4107	99.4704	64.2832	1.30712e-25	1.27588e-25	4.44466e-07	2.08118e-25	1	17227500	17527500	0
chr11	122795000	122800000	chr11	122850000	122855000	.	.	.	.	255255	852	217.387	213.161	214.04	264.385	0	0	0	0	25	122801500	122851700	16298
chr11	77410000	77415000	chr11	77470000	77475000	.	.	.	.	255255	579	276.625	278.366	338.105	348.432	1.12632e-35	1.41549e-35	3.10738e-14	3.03818e-14	4	77421250	77472500	16250
chr11	55940000	55945000	chr11	56780000	56785000	.	.	.	.	255255	235	49.1433	43.5401	55.5593	37.6056	0	0	0	0	13	55945576	56782884	12786
chr11	35735000	35740000	chr11	35780000	35785000	.	.	.	.	255255	348	163.649	180.128	196.89	205.52	2.24157e-18	2.77939e-18	1.4054e-06	1.38257e-06	5	35729500	35784500	18111
chr11	34925000	34930000	chr11	35085000	35090000	.	.	.	.	255255	353	171.159	172.009	230.877	144.372	1.55779e-19	1.90527e-19	3.04841e-07	4.35087e-36	2	34927500	35082500	5000
chr11	15645000	15650000	chr11	16605000	16610000	.	.	.	.	255255	96	32.4873	34.3641	38.0235	35.7433	1.31944e-10	1.67679e-10	2.05527e-10	2.12857e-10	6	15650000	16610000	7906
chr11	78645000	78650000	chr11	79075000	79080000	.	.	.	.	255255	231	77.8536	80.2743	124.372	72.7345	2.09166e-25	2.03115e-25	9.60835e-06	9.8532e-39	6	78645833	79081666	15922
chr11	83840000	83850000	chr11	85580000	85590000	.	.	.	.	255255	71	38.0206	33.4563	37.817	30.1481	0.00368709	0.00819574	0.00810641	9.17384e-06	1	83845000	85585000	0
chr11	95150000	95155000	chr11	95760000	95765000	.	.	.	.	255255	621	147.339	122.442	172.802	142.411	0	0	0	0	23	95155978	95765978	16884
chr11	71635000	71640000	chr11	71740000	71745000	.	.	.	.	255255	82	29.2942	30.8277	35.1418	39.3062	3.60932e-10	5.02111e-10	6.34704e-06	0.007081	4	71640000	71737500	5590
chr11	119200000	119210000	chr11	119320000	119330000	.	.	.	.	255255	763	368.46	359.526	438.627	408.517	0	0	2.68379e-23	2.73557e-23	3	119201666	119328333	7454
chr11	64850000	64855000	chr11	65495000	65500000	.	.	.	.	255255	63	23.6883	23.1209	23.2247	22.2045	6.62661e-07	1.04303e-06	1.0988e-06	1.10604e-06	3	64857500	65495833	6009
chr11	109845000	109850000	chr11	110095000	110100000	.	.	.	.	255255	186	87.9039	95.3136	111.912	90.236	9.17205e-12	1.05251e-11	6.7766e-05	1.42232e-11	5	109854500	110099500	13153
chr11	82715000	82720000	chr11	82865000	82870000	.	.	.	.	255255	256	112.003	96.027	114.354	100.283	5.43023e-21	9.36366e-35	8.53967e-21	8.55965e-21	7	82718928	82858928	9091
chr11	50445000	50450000	chr11	50485000	50490000	.	.	.	.	255255	282	116.879	107.687	167.553	53.0952	3.32184e-29	3.20196e-29	5.46683e-06	0	2	50447500	50492500	5000
chr11	57345000	57350000	chr11	57525000	57530000	.	.	.	.	255255	201	76.3491	73.3002	109.938	63.9121	2.21917e-26	2.1506e-26	1.89784e-07	3.52577e-26	3	57345833	57525833	3727
chr11	31105000	31110000	chr11	32170000	32175000	.	.	.	.	255255	96	23.0527	25.7353	35.3745	23.8986	1.47677e-22	5.84158e-16	2.05527e-10	3.1027e-22	3	31105833	32175833	3727
chr11	20385000	20390000	chr11	20610000	20615000	.	.	.	.	255255	298	139.239	116.823	104.42	175.725	8.01256e-20	7.91627e-35	1.3281e-34	2.28538e-08	16	20392187	20609062	15493
chr11	76200000	76205000	chr11	76680000	76685000	.	.	.	.	255255	98	48.9801	45.1587	46.1751	50.3622	0.00408303	1.71262e-06	1.95377e-06	0.00618383	3	76210833	76682500	8333
chr11	116510000	116515000	chr11	116690000	116695000	.	.	.	.	255255	154	48.1134	46.6673	49.701	53.6738	1.15859e-27	1.22177e-27	2.57549e-18	2.74256e-18	3	116512500	116692500	5000
chr11	93230000	93235000	chr11	93650000	93655000	.	.	.	.	255255	408	103.869	86.6601	116.636	106.519	0	0	0	0	16	93235312	93649687	12508
chr11	57565000	57570000	chr11	57640000	57645000	.	.	.	.	255255	743	170.349	159.141	184.107	217.838	0	0	0	0	25	57574300	57640100	22000
chr11	18115000	18120000	chr11	18805000	18810000	.	.	.	.	255255	117	55.1892	52.0128	60.8848	50.4734	5.41128e-07	6.81432e-07	7.98252e-07	8.42134e-07	1	18117500	18807500	0
chr11	67345000	67350000	chr11	67380000	67385000	.	.	.	.	255255	818	349.005	348.321	289.712	403.4	0	0	0	1.79194e-33	9	67350277	67389722	10615
chr11	1695000	1700000	chr11	1820000	1825000	.	.	.	.	255255	370	154.6	147.443	190.019	176.117	1.04716e-23	2.47e-42	1.59094e-23	1.67792e-23	17	1700147	1826323	15657
chr11	54995000	55000000	chr11	55215000	55220000	.	.	.	.	255255	115	62.215	56.648	72.5914	51.1466	0.00908999	2.08893e-06	0.0130437	2.56097e-06	2	54997500	55220000	2500
chr11	121320000	121325000	chr11	121590000	121595000	.	.	.	.	255255	875	207.171	217.509	286.298	273.458	0	0	0	0	22	121320000	121591136	14027
chr11	31395000	31400000	chr11	32170000	32175000	.	.	.	.	255255	105	35.6696	39.0864	43.6604	44.3802	5.26728e-14	1.78564e-08	2.1251e-08	2.27786e-08	4	31392500	32177500	14142
chr11	19255000	19260000	chr11	19555000	19560000	.	.	.	.	255255	287	131.554	95.6894	101.122	120.743	4.80588e-17	0	1.00741e-30	1.03371e-30	13	19260192	19550576	14980
chr11	86615000	86620000	chr11	86665000	86670000	.	.	.	.	255255	151	21.1327	41.0615	56.5847	51.4482	0	3.00331e-26	3.20252e-17	3.40174e-17	1	86617500	86667500	0
chr11	59165000	59170000	chr11	59430000	59435000	.	.	.	.	255255	459	121.157	97.3217	117.207	145.275	0	0	0	0	18	59169722	59428611	14164
chr11	133925000	133930000	chr11	134140000	134145000	.	.	.	.	255255	200	78.2256	72.19	85.1633	87.2427	1.53089e-15	5.24196e-26	2.3639e-15	2.38441e-15	8	133930625	134141875	13140
chr11	63765000	63770000	chr11	63945000	63950000	.	.	.	.	255255	135	54.6296	52.437	68.0719	57.1527	5.19238e-12	5.81493e-12	4.54377e-06	8.29516e-12	2	63767500	63945000	2500
chr11	110200000	110205000	chr11	110430000	110435000	.	.	.	.	255255	541	142.374	129.28	172.621	156.555	0	0	0	0	11	110202500	110433409	16122
chr11	85855000	85860000	chr11	85935000	85940000	.	.	.	.	255255	199	109.005	97.6187	110.581	97.2382	2.89044e-07	3.71408e-07	4.44466e-07	4.554e-07	1	85857500	85937500	0
chr11	6375000	6380000	chr11	6505000	6510000	.	.	.	.	255255	358	178.899	139.734	194.512	131.428	1.00622e-20	5.54293e-38	6.21642e-08	8.83657e-38	9	6378611	6508611	9703
chr11	103680000	103685000	chr11	105865000	105870000	.	.	.	.	255255	32	8.30198	8.91906	9.06045	9.40908	0.000149297	0.00046071	0.000376709	0.000363787	1	103682500	105867500	0
chr11	65710000	65715000	chr11	65820000	65825000	.	.	.	.	255255	454	182.55	212.814	252.803	252.223	0	8.21309e-27	1.84369e-10	1.85381e-10	9	65709722	65819166	8462
chr11	60825000	60830000	chr11	60895000	60900000	.	.	.	.	255255	602	310.039	296.196	323.234	362.31	4.69105e-18	1.4813e-41	6.67274e-18	6.51272e-18	17	60836617	60896617	16408
chr11	108320000	108325000	chr11	108355000	108360000	.	.	.	.	255255	145	48.2645	68.185	30.1053	91.0756	1.5045e-23	2.05306e-08	0	0.00207428	2	108315000	108357500	7500
chr11	10930000	10935000	chr11	11020000	11025000	.	.	.	.	255255	547	134.629	125.738	140.958	141.79	0	0	0	0	20	10934500	11021000	15692
chr11	63830000	63840000	chr11	64140000	64150000	.	.	.	.	255255	706	175.718	244.022	249.289	310.2	0	0	0	5.15169e-39	7	63827857	64156428	15453
chr11	10405000	10410000	chr11	10735000	10740000	.	.	.	.	255255	547	97.274	92.9711	107.274	125.915	0	0	0	0	24	10407708	10733541	16042
chr11	18010000	18015000	chr11	18100000	18105000	.	.	.	.	255255	286	138.387	132.787	139.632	151.331	8.43218e-17	9.69463e-17	1.29522e-16	1.31206e-16	13	18000576	18102115	16698
chr11	5200000	5205000	chr11	5805000	5810000	.	.	.	.	255255	95	28.7296	37.6006	43.082	41.9125	1.18324e-15	3.85388e-10	1.15112e-05	1.22839e-05	2	5202500	5802500	5000
chr11	57455000	57460000	chr11	57525000	57530000	.	.	.	.	255255	464	168.909	172.711	174.31	256.986	0	0	0	5.84942e-12	5	57454500	57520500	18111
chr11	125260000	125265000	chr11	125305000	125310000	.	.	.	.	255255	273	130.835	146.148	154.1	167.43	8.89311e-14	1.06707e-13	8.15589e-05	8.33448e-05	3	125267500	125317500	11180
chr11	35665000	35670000	chr11	35780000	35785000	.	.	.	.	255255	229	96.1802	110.999	119.336	118.212	1.03303e-24	1.22725e-13	1.65997e-13	1.66951e-13	2	35665000	35782500	2500
chr11	54860000	54870000	chr11	55630000	55640000	.	.	.	.	255255	161	79.7142	80.352	83.2854	90.9008	7.32135e-06	1.31684e-05	1.51699e-05	1.51669e-05	2	54860000	55635000	5000
chr11	5200000	5205000	chr11	5290000	5295000	.	.	.	.	255255	258	108.956	111.179	124.391	105.494	1.38893e-21	1.44082e-21	1.96452e-10	2.19056e-21	5	5203500	5288500	6083
chr11	40300000	40305000	chr11	42525000	42530000	.	.	.	.	255255	54	20.7386	17.7199	14.0679	23.7176	0.000523278	2.2889e-06	1.79697e-09	0.000854349	2	40302500	42525000	2500
chr11	86605000	86610000	chr11	86815000	86820000	.	.	.	.	255255	222	63.979	63.2934	63.957	67.1328	5.27476e-35	4.93639e-35	8.38164e-35	8.77783e-35	8	86611875	86816875	7126
chr11	95835000	95840000	chr11	96425000	96430000	.	.	.	.	255255	304	151.611	113.552	157.183	126.055	2.0459e-21	4.96458e-37	2.2651e-09	3.1731e-21	2	95837500	96425000	2500
chr11	12190000	12195000	chr11	12230000	12235000	.	.	.	.	255255	313	109.933	134.409	203.038	89.0838	2.2092e-40	7.23785e-24	0.00773645	0	2	12192500	12237500	5000
chr11	14380000	14385000	chr11	14440000	14445000	.	.	.	.	255255	300	146.804	149.534	184.646	160.793	2.39139e-20	2.65523e-20	1.05743e-08	1.08175e-08	4	14372500	14447500	11180
chr11	100850000	100855000	chr11	100930000	100935000	.	.	.	.	255255	336	147.102	135.778	134.592	158.029	9.15465e-31	9.36719e-31	1.389e-30	1.68397e-15	1	100852500	100932500	0
chr11	30125000	30130000	chr11	30910000	30915000	.	.	.	.	255255	124	48.5518	48.3911	56.0579	55.7977	6.01998e-15	6.59712e-15	1.23947e-08	1.31303e-08	5	30130500	30916500	8062
chr11	66590000	66595000	chr11	66675000	66680000	.	.	.	.	255255	557	255.936	261.815	283.781	318.986	2.44728e-30	3.13631e-30	3.54893e-30	4.22433e-11	16	66578437	66679687	18609
chr11	33365000	33370000	chr11	33690000	33695000	.	.	.	.	255255	472	162.91	166.097	217.76	174.642	0	0	2.80049e-31	0	16	33362812	33689062	15693
chr11	110290000	110295000	chr11	110370000	110375000	.	.	.	.	255255	546	278.851	269.916	305.778	319.609	8.12767e-28	1.05041e-27	1.14527e-09	1.13012e-09	11	110293863	110358863	21670
chr11	63640000	63645000	chr11	63735000	63740000	.	.	.	.	255255	308	155.38	145.85	143.307	190.402	2.80583e-10	1.81658e-22	2.5299e-22	4.76497e-10	4	63643750	63740000	13975
chr11	79710000	79715000	chr11	80155000	80160000	.	.	.	.	255255	139	59.6993	58.4004	64.2432	69.2759	2.7983e-13	3.06674e-13	6.24805e-07	6.29934e-07	11	79709772	80153863	13491
chr11	72025000	72030000	chr11	72145000	72150000	.	.	.	.	255255	408	179.185	191.206	259.164	188.311	3.0352e-34	3.32131e-34	8.09272e-05	4.73445e-34	5	72023500	72144500	6325
chr11	119480000	119485000	chr11	119530000	119535000	.	.	.	.	255255	592	171.302	165.479	167.544	189.45	0	0	0	0	9	119486388	119533055	11126
chr11	129360000	129365000	chr11	129695000	129700000	.	.	.	.	255255	322	137.988	145.504	161.884	151.058	1.6891e-26	1.78259e-26	1.17385e-12	2.60948e-26	8	129366875	129696250	16829
chr11	118290000	118300000	chr11	118340000	118350000	.	.	.	.	255255	1302	584.082	651.142	635.037	730.859	0	0	0	0	3	118298333	118351666	7454
chr11	90290000	90295000	chr11	91235000	91240000	.	.	.	.	255255	65	27.5196	33.5507	36.9992	38.0039	0.000151322	0.0408575	0.0394042	0.0396461	3	90294166	91244166	6871
chr11	74390000	74395000	chr11	74450000	74455000	.	.	.	.	255255	359	175.319	172.76	188.287	192.447	5.75227e-21	6.94079e-21	8.90712e-21	9.32094e-21	10	74387500	74450000	9014
chr11	108335000	108340000	chr11	108645000	108650000	.	.	.	.	255255	183	82.9441	76.7207	54.1501	114.838	5.14044e-11	9.53131e-20	3.64687e-30	0.000195218	3	108340833	108649166	3728
chr11	113870000	113880000	chr11	114400000	114410000	.	.	.	.	255255	147	73.1133	68.3934	75.0812	68.6843	1.39832e-08	2.56457e-08	3.03359e-08	3.02528e-08	1	113875000	114405000	0
chr11	15100000	15105000	chr11	15155000	15160000	.	.	.	.	255255	626	234.983	248.368	323.818	267.963	0	0	3.86224e-22	0	10	15105500	15155500	24352
chr11	125920000	125930000	chr11	126480000	126490000	.	.	.	.	255255	226	112.001	113.307	142.554	115.743	1.45666e-12	2.13193e-12	0.000115046	2.95344e-12	1	125925000	126485000	0
chr11	300000	310000	chr11	350000	360000	.	.	.	.	255255	1344	694.655	661.27	608.381	814.788	0	0	0	2.79968e-20	2	305000	360000	5000
chr11	120505000	120510000	chr11	120930000	120935000	.	.	.	.	255255	357	143.169	150.957	214.662	151.67	1.22066e-37	1.21141e-37	8.58427e-08	1.93142e-37	20	120512500	120943500	20025
chr11	58960000	58970000	chr11	59130000	59140000	.	.	.	.	255255	518	215.621	237.559	268.328	273.011	0	0	1.76413e-21	1.80772e-21	5	58957000	59145000	20100
chr11	131865000	131870000	chr11	132125000	132130000	.	.	.	.	255255	159	38.2117	39.0579	52.1734	41.9498	3.0467e-41	4.81912e-30	3.36574e-20	7.25972e-30	2	131865000	132130000	3536
chr11	5475000	5480000	chr11	5890000	5895000	.	.	.	.	255255	126	47.4853	48.142	45.7356	53.8557	1.06919e-15	1.15358e-15	1.52428e-15	3.71163e-09	5	5471500	5889500	14142
chr11	5200000	5205000	chr11	5370000	5375000	.	.	.	.	255255	385	110.986	117.356	135.621	142.823	0	0	0	0	17	5202794	5377794	16002
chr11	57660000	57670000	chr11	58280000	58290000	.	.	.	.	255255	150	69.658	75.0142	69.7485	92.4853	2.48197e-09	4.52088e-09	5.41724e-09	0.00107958	1	57665000	58285000	0
chr11	74930000	74935000	chr11	75245000	75250000	.	.	.	.	255255	224	84.7893	83.0575	114.712	84.1826	5.24288e-23	5.20913e-23	2.62884e-12	8.30826e-23	5	74930500	75248500	12042
chr11	117430000	117435000	chr11	117465000	117470000	.	.	.	.	255255	355	155.461	184.8	187.619	179.082	5.24829e-20	6.40086e-20	8.14445e-20	8.54796e-20	3	117429166	117474166	14337
chr11	75290000	75295000	chr11	75325000	75330000	.	.	.	.	255255	430	204.485	245.473	221.269	249.762	2.64656e-21	2.46927e-07	4.30196e-21	2.99862e-07	3	75287500	75327500	5000
chr11	103200000	103205000	chr11	103600000	103605000	.	.	.	.	255255	134	53.4714	49.2326	53.0792	55.5635	1.0576e-11	1.1904e-11	1.57418e-11	1.69198e-11	6	103202500	103598333	7683
chr11	86470000	86480000	chr11	88320000	88330000	.	.	.	.	255255	72	31.0767	33.8438	36.4762	32.1962	0.00227878	0.00508318	0.00504722	0.00497154	1	86475000	88325000	0
chr11	16945000	16950000	chr11	17280000	17285000	.	.	.	.	255255	147	72.8978	79.2422	90.1583	79.4889	5.52569e-09	0.000967808	0.00105516	0.00107185	2	16937500	17282500	10000
chr11	35005000	35010000	chr11	35040000	35045000	.	.	.	.	255255	718	348.058	404.155	374.387	372.475	3.559e-42	4.4907e-16	4.99e-42	4.739e-42	1	35007500	35042500	0
chr11	54640000	54645000	chr11	54705000	54710000	.	.	.	.	255255	66	29.821	31.1523	34.5967	33.4175	8.07163e-05	0.0279712	0.0270663	0.0273536	2	54650000	54707500	7500
chr11	87460000	87470000	chr11	88540000	88550000	.	.	.	.	255255	139	53.5422	72.8222	74.1	82.7954	7.06275e-13	1.9125e-06	2.24963e-06	0.0326384	2	87465000	88550000	5000
chr11	102280000	102285000	chr11	102610000	102615000	.	.	.	.	255255	466	238.535	211.196	237.727	262.276	6.54979e-30	7.90444e-30	1.01179e-29	2.86207e-12	11	102285681	102612954	15561
chr11	68080000	68085000	chr11	68190000	68195000	.	.	.	.	255255	388	160.378	197.207	212.596	229.896	1.69978e-28	8.23691e-13	1.02654e-12	9.93604e-13	7	68079642	68201785	14445
chr11	119480000	119485000	chr11	119730000	119735000	.	.	.	.	255255	114	56.011	56.802	71.1239	55.8548	2.82099e-06	3.61053e-06	0.0177004	4.38673e-06	2	119482500	119730000	2500
chr11	68025000	68030000	chr11	68300000	68305000	.	.	.	.	255255	153	75.8559	79.2363	87.4968	80.6122	1.58432e-10	0.000109141	0.000122301	0.000124275	1	68027500	68302500	0
chr11	75275000	75280000	chr11	75530000	75535000	.	.	.	.	255255	166	80.526	73.8576	85.5321	75.714	3.32321e-07	3.42978e-14	5.01407e-07	4.77343e-14	3	75277500	75529166	8333
chr11	110445000	110450000	chr11	111440000	111445000	.	.	.	.	255255	113	43.9863	51.2546	58.4172	60.9355	4.52859e-11	6.18008e-06	7.11132e-06	7.44357e-06	8	110448750	111441250	8839
chr11	75895000	75900000	chr11	76315000	76320000	.	.	.	.	255255	152	31.2537	35.2379	44.505	42.9648	6.0689e-37	6.86686e-37	1.45948e-26	1.4812e-26	11	75900227	76320227	14266
chr11	26865000	26870000	chr11	27025000	27030000	.	.	.	.	255255	180	88.1447	100.061	99.8425	111.471	2.73308e-10	0.00045137	0.000506329	0.00051934	1	26867500	27027500	0
chr11	117180000	117185000	chr11	117225000	117230000	.	.	.	.	255255	490	162.976	157.821	155.125	175.815	0	0	0	0	9	117187500	117226944	11440
chr11	1820000	1825000	chr11	2150000	2155000	.	.	.	.	255255	231	71.4856	75.0186	78.1937	107.935	5.62636e-39	5.23286e-39	3.29702e-25	5.35878e-14	8	1829375	2154375	14389
chr11	35615000	35620000	chr11	36490000	36495000	.	.	.	.	255255	65	21.2191	20.5862	23.0751	22.7775	1.19477e-07	1.88203e-07	2.0086e-07	2.00585e-07	1	35617500	36492500	0
chr11	84100000	84105000	chr11	84150000	84155000	.	.	.	.	255255	161	72.856	82.6031	92.4206	82.1478	9.49412e-13	4.05534e-06	4.73448e-06	4.81047e-06	1	84102500	84152500	0
chr11	108700000	108705000	chr11	108870000	108875000	.	.	.	.	255255	344	170.281	156.264	179.947	178.264	1.80266e-17	2.25047e-17	2.84985e-17	2.97911e-17	12	108696666	108867916	10842
chr11	111775000	111780000	chr11	111840000	111845000	.	.	.	.	255255	670	291.17	285.353	315.943	320.163	0	0	6.08138e-31	5.89921e-31	12	111780416	111837500	22084
chr11	59055000	59060000	chr11	59155000	59160000	.	.	.	.	255255	327	180.924	147.381	189.706	155.459	7.41143e-14	5.62139e-28	1.19219e-13	1.24905e-13	10	59055000	59142000	15700
chr11	61335000	61340000	chr11	61385000	61390000	.	.	.	.	255255	1039	207.818	243.683	342.028	321.428	0	0	0	0	21	61338214	61387738	18240
chr11	16945000	16950000	chr11	17200000	17205000	.	.	.	.	255255	162	71.2388	78.6535	94.0868	84.1915	4.85452e-13	2.60823e-06	3.0589e-06	3.11216e-06	2	16947500	17205000	2500
chr11	19310000	19320000	chr11	19900000	19910000	.	.	.	.	255255	377	168.668	181.61	190.016	221.499	3.35458e-25	3.72076e-25	5.7959e-25	1.2859e-10	3	19318333	19908333	7454
chr11	1160000	1165000	chr11	1210000	1215000	.	.	.	.	255255	118	40.3364	58.4983	63.368	69.418	9.0143e-13	3.83111e-07	0.00491609	0.00500635	1	1162500	1212500	0
chr11	26295000	26300000	chr11	27155000	27160000	.	.	.	.	255255	103	27.2482	23.9549	30.9753	27.4777	1.8757e-19	2.34761e-26	4.87169e-13	3.42172e-19	13	26292115	27159807	10728
chr11	7890000	7895000	chr11	8100000	8105000	.	.	.	.	255255	162	83.2944	77.8591	96.1663	74.6899	2.02593e-06	2.60823e-06	3.0589e-06	7.34204e-13	3	7892500	8097500	7071
chr11	94620000	94625000	chr11	94760000	94765000	.	.	.	.	255255	252	142.707	125.926	144.924	125.25	1.76826e-09	2.25802e-09	2.8065e-09	2.84339e-09	2	94627500	94757500	7071
chr11	3475000	3480000	chr11	3570000	3575000	.	.	.	.	255255	72	29.4986	34.3753	38.0861	35.3148	1.27972e-06	0.00191152	0.00194822	0.00198226	5	3486500	3575500	20616
chr11	305000	310000	chr11	515000	520000	.	.	.	.	255255	114	48.2066	55.6905	49.1147	65.1788	2.11683e-11	3.61053e-06	4.17551e-06	0.0179629	1	307500	517500	0
chr11	85590000	85600000	chr11	86810000	86820000	.	.	.	.	255255	138	56.1287	56.5718	65.2976	57.1834	1.4783e-12	2.86172e-12	3.73492e-06	3.27199e-12	2	85590000	86815000	5000
chr11	72585000	72590000	chr11	72680000	72685000	.	.	.	.	255255	415	194.158	185.109	258.288	170.387	4.2241e-18	2.50802e-36	1.5465e-05	3.58312e-36	4	72585000	72685000	3536
chr11	60910000	60920000	chr11	61960000	61970000	.	.	.	.	255255	86	32.5776	37.4142	40.0335	39.7512	4.85795e-07	1.13952e-06	0.00354548	0.00353963	2	60915000	61970000	5000
chr11	125720000	125725000	chr11	125870000	125875000	.	.	.	.	255255	185	98.5728	89.7015	84.4746	115.862	6.26202e-05	1.88785e-11	2.47714e-11	9.87881e-05	4	125725000	125876250	9763
chr11	128630000	128635000	chr11	128755000	128760000	.	.	.	.	255255	467	158.779	164.023	182.27	203.961	0	0	0	5.40707e-30	8	128635000	128754375	12135
chr11	48780000	48785000	chr11	48840000	48845000	.	.	.	.	255255	121	41.6834	43.0073	37.2697	56.8797	7.65811e-14	8.45218e-14	9.4885e-21	8.20524e-08	1	48782500	48842500	0
chr11	112585000	112590000	chr11	113110000	113115000	.	.	.	.	255255	128	54.921	58.6425	67.1382	58.6244	6.39776e-10	7.50717e-10	0.000108358	1.0116e-09	2	112585000	113115000	3536
chr11	14540000	14550000	chr11	14760000	14770000	.	.	.	.	255255	649	304.472	297.786	371.42	352.723	1.14488e-26	0	1.72224e-26	1.73784e-26	7	14535000	14773571	15186
chr11	76730000	76735000	chr11	76795000	76800000	.	.	.	.	255255	440	149.199	150.117	164.502	169.508	0	0	0	0	19	76733552	76794078	17042
chr11	8915000	8920000	chr11	9135000	9140000	.	.	.	.	255255	185	81.4218	78.3448	81.6509	97.9309	1.63919e-11	1.88785e-11	2.47714e-11	9.87881e-05	3	8917500	9135833	6009
chr11	25980000	25985000	chr11	26225000	26230000	.	.	.	.	255255	300	86.2299	93.2338	111.759	97.3793	0	0	2.49283e-35	2.54286e-35	14	25983928	26225000	18740
chr11	54910000	54915000	chr11	55410000	55415000	.	.	.	.	255255	77	34.597	41.784	45.3486	38.3388	8.77998e-05	0.0442668	0.0428815	0.000138976	2	54907500	55420000	9014
chr11	59750000	59755000	chr11	59800000	59805000	.	.	.	.	255255	1011	177.956	170.525	166.287	246.365	0	0	0	0	16	59753437	59805000	20637
chr11	95150000	95155000	chr11	95705000	95710000	.	.	.	.	255255	619	125.583	122.932	163.698	134.387	0	0	0	0	16	95158750	95703437	13782
chr11	71245000	71250000	chr11	71420000	71425000	.	.	.	.	255255	185	93.824	90.5906	94.1102	110.706	1.63919e-11	1.88785e-11	2.47714e-11	9.87881e-05	1	71247500	71422500	0
chr11	72475000	72480000	chr11	72555000	72560000	.	.	.	.	255255	602	247.297	288.67	373.473	322.183	1.1882e-41	1.4813e-41	6.67274e-18	6.51272e-18	29	72477500	72568706	22925
chr11	58195000	58200000	chr11	78655000	78660000	.	.	.	.	255255	51	0.650062	0.777789	0.493936	1.28087	0	0	0	0	3	58197500	78657500	5000
chr11	96160000	96165000	chr11	96210000	96215000	.	.	.	.	255255	278	111.314	140.371	171.715	163.138	7.19697e-28	7.75755e-15	1.88912e-05	1.92737e-05	1	96162500	96212500	0
chr11	7095000	7100000	chr11	7440000	7445000	.	.	.	.	255255	227	78.4432	68.1004	81.2718	73.3985	5.06078e-24	3.19674e-37	7.91557e-24	5.85822e-37	7	7098928	7442500	6428
chr11	119210000	119215000	chr11	119275000	119280000	.	.	.	.	255255	493	239.955	262.931	318.814	308.763	3.55168e-37	6.49929e-17	0.000389638	0.000382848	6	119205833	119282500	8334
chr11	32050000	32055000	chr11	32295000	32300000	.	.	.	.	255255	173	69.9758	73.9114	82.7709	80.0584	2.05964e-16	2.1581e-16	1.6682e-08	1.69437e-08	1	32052500	32297500	0
chr11	120330000	120335000	chr11	120630000	120635000	.	.	.	.	255255	158	68.4921	71.3955	95.1098	66.9427	6.79277e-12	7.70738e-12	1.68381e-05	1.02796e-11	2	120332500	120625000	7500
chr11	1895000	1900000	chr11	1940000	1945000	.	.	.	.	255255	734	143.976	189.922	235.813	169.908	0	0	0	0	20	1897000	1940000	26201
chr11	69910000	69915000	chr11	70470000	70475000	.	.	.	.	255255	100	37.5879	37.9249	42.1449	40.6391	4.53149e-12	5.63424e-12	5.6491e-07	6.04533e-07	4	69915000	70472500	7500
chr11	61670000	61680000	chr11	62910000	62920000	.	.	.	.	255255	73	28.7822	31.8613	31.0649	34.8329	8.20906e-07	0.00310198	0.00306255	0.003023	1	61675000	62915000	0
chr11	115330000	115335000	chr11	115980000	115985000	.	.	.	.	255255	136	58.1325	56.215	68.3845	57.8399	2.52837e-12	2.81276e-12	2.79833e-06	4.06205e-12	5	115335500	115984500	8544
chr11	16785000	16790000	chr11	17060000	17065000	.	.	.	.	255255	360	156.942	131.62	130.41	218.784	3.28511e-21	1.13598e-38	1.76622e-38	3.14283e-08	3	16785833	17064166	3728
chr11	117805000	117810000	chr11	117945000	117950000	.	.	.	.	255255	867	410.542	341.639	292.273	565.112	0	0	0	6.95007e-15	1	117807500	117947500	0
chr11	112115000	112120000	chr11	112280000	112285000	.	.	.	.	255255	160	49.1234	47.8103	51.8468	60.0985	9.16188e-21	1.57931e-30	1.3985e-20	1.47371e-20	11	112113409	112278409	12407
chr11	48290000	48295000	chr11	48765000	48770000	.	.	.	.	255255	42	14.2588	13.4905	14.6759	15.0622	0.000143837	0.00029193	0.000259222	0.000256391	1	48292500	48767500	0
chr11	54800000	54810000	chr11	55420000	55430000	.	.	.	.	255255	144	57.4661	69.9923	84.0425	82.9254	1.52683e-14	1.35541e-07	0.00773529	0.00775296	1	54805000	55425000	0
chr11	109940000	109945000	chr11	110430000	110435000	.	.	.	.	255255	181	52.5632	58.1549	69.8235	74.9833	1.74229e-29	1.70895e-29	6.80544e-19	6.95909e-19	5	109947500	110433500	6403
chr11	61255000	61260000	chr11	61385000	61390000	.	.	.	.	255255	308	128.129	104.683	157.078	117.98	1.66437e-22	1.59072e-38	4.63104e-10	2.79917e-38	9	61261388	61390277	12826
chr11	75970000	75975000	chr11	76005000	76010000	.	.	.	.	255255	321	154.278	178.727	193.818	147.296	1.12718e-12	1.48917e-12	0.00149023	5.14054e-26	3	75959166	76010833	13744
chr11	116450000	116455000	chr11	116690000	116695000	.	.	.	.	255255	196	66.0098	60.6166	62.2175	68.307	1.83363e-24	2.11744e-36	2.7702e-24	2.88246e-24	7	116455357	116691071	8835
chr11	4180000	4185000	chr11	4540000	4545000	.	.	.	.	255255	512	236.761	187.339	248.415	194.35	7.85e-43	0	1.8967e-20	1.15e-42	17	4188088	4546323	14910
chr11	63030000	63035000	chr11	63635000	63640000	.	.	.	.	255255	79	18.009	20.1075	21.54	23.1787	5.62265e-19	1.86999e-13	2.33888e-13	2.10312e-13	2	63035000	63637500	2500
chr11	46910000	46920000	chr11	47150000	47160000	.	.	.	.	255255	1433	509.627	516.728	501.562	817.99	0	0	0	5.62594e-32	1	46915000	47155000	0
chr11	19070000	19075000	chr11	19255000	19260000	.	.	.	.	255255	249	131.075	115.607	150.722	111.664	6.30329e-09	6.04706e-19	1.00273e-08	8.83532e-19	6	19074166	19255833	11785
chr11	74030000	74035000	chr11	74095000	74100000	.	.	.	.	255255	192	93.5752	106.941	119.081	110.65	2.50442e-13	6.35863e-06	7.43399e-06	7.62803e-06	1	74032500	74097500	0
chr11	112220000	112230000	chr11	112550000	112560000	.	.	.	.	255255	325	157.016	183.818	201.428	205.238	3.88036e-13	4.95939e-13	0.000923666	0.000946502	2	112220000	112555000	5000
chr11	108220000	108230000	chr11	110090000	110100000	.	.	.	.	255255	87	42.2574	42.4664	42.416	45.0414	0.00100766	0.00223188	0.00225334	0.00224426	1	108225000	110095000	0
chr11	49735000	49740000	chr11	88890000	88895000	.	.	.	.	255255	69	0.82488	0.571451	0.341411	0.381275	0	0	0	0	1	49737500	88892500	0
chr11	11155000	11160000	chr11	11785000	11790000	.	.	.	.	255255	147	75.8148	68.5057	72.4598	83.0084	5.52569e-09	6.60036e-09	8.22543e-09	0.00107185	1	11157500	11787500	0
chr11	22245000	22250000	chr11	22790000	22795000	.	.	.	.	255255	164	69.9666	76.5835	83.9865	92.4412	1.25081e-13	1.37856e-13	1.2537e-06	1.27933e-06	2	22247500	22790000	2500
chr11	120505000	120510000	chr11	121190000	121195000	.	.	.	.	255255	215	90.9662	86.4801	92.8256	96.2728	4.59305e-20	4.67487e-20	7.16831e-20	7.23515e-20	5	120508500	121198500	9055
chr11	63665000	63670000	chr11	63740000	63745000	.	.	.	.	255255	195	92.2896	91.8885	92.8195	116.633	3.84396e-14	4.25359e-14	5.88692e-14	2.35236e-06	2	63677500	63742500	10000
chr11	113305000	113310000	chr11	113530000	113535000	.	.	.	.	255255	616	76.4076	72.5903	109.315	86.1068	0	0	0	0	25	113305700	113531700	15744
chr11	81645000	81650000	chr11	82035000	82040000	.	.	.	.	255255	90	41.1851	40.6445	45.5176	39.5811	0.000116805	0.000163469	0.000173762	0.000184351	4	81651250	82041250	12870
chr11	83835000	83840000	chr11	84245000	84250000	.	.	.	.	255255	214	89.2093	87.6331	119.26	84.6683	9.49208e-20	9.69861e-20	4.61977e-10	1.49807e-19	9	83837500	84259722	12222
chr11	86040000	86045000	chr11	86290000	86295000	.	.	.	.	255255	504	205.116	214.096	264.11	249.98	2.5146e-40	2.89147e-40	6.86027e-19	6.96777e-19	11	86042500	86290227	13674
chr11	81505000	81510000	chr11	81555000	81560000	.	.	.	.	255255	155	66.9797	74.7335	81.8505	83.6258	4.59176e-11	5.2629e-11	5.64797e-05	5.74856e-05	1	81507500	81557500	0
chr11	83855000	83860000	chr11	84025000	84030000	.	.	.	.	255255	101	51.0086	49.4499	58.6401	50.44	0.00128224	0.00181363	0.00188997	0.00195411	1	83857500	84027500	0
chr11	12320000	12330000	chr11	13180000	13190000	.	.	.	.	255255	118	57.0372	56.5248	65.0923	60.8447	7.28172e-07	1.41429e-06	0.0146037	1.59912e-06	1	12325000	13185000	0
chr11	210000	215000	chr11	355000	360000	.	.	.	.	255255	260	127.388	131.494	159.617	171.774	4.97391e-11	6.2154e-11	0.00237296	0.00242412	8	204375	361875	9228
chr11	88295000	88300000	chr11	88815000	88820000	.	.	.	.	255255	51	12.3741	16.7169	15.8545	24.4957	7.34466e-12	3.13647e-05	3.00082e-05	0.00509349	2	88302500	88815000	5590
chr11	55885000	55890000	chr11	55935000	55940000	.	.	.	.	255255	54	5.24344	13.0443	17.7767	15.9837	1.15512e-26	1.55202e-09	2.22674e-06	2.36897e-06	1	55887500	55937500	0
chr11	63765000	63770000	chr11	63830000	63835000	.	.	.	.	255255	160	85.5913	78.7767	90.2156	80.5894	4.81155e-06	6.26265e-06	7.27055e-06	7.38841e-06	1	63767500	63832500	0
chr11	55710000	55720000	chr11	56780000	56790000	.	.	.	.	255255	149	67.61	53.9275	46.024	66.3325	4.44021e-09	5.34129e-16	1.24638e-24	9.59361e-09	3	55718333	56781666	7454
chr11	62335000	62340000	chr11	62370000	62375000	.	.	.	.	255255	529	263.131	264.793	298.661	271.796	4.1563e-24	5.49977e-24	6.246e-24	6.35406e-24	6	62336666	62376666	10866
chr11	88230000	88235000	chr11	88540000	88545000	.	.	.	.	255255	354	128.371	120.293	126.329	159.211	1.2725e-36	0	1.95481e-36	1.47165e-19	11	88232500	88543863	15137
chr11	49160000	49170000	chr11	89670000	89680000	.	.	.	.	255255	14	1.88912	0.792533	0.524194	0.215547	0.000802595	3.52899e-05	2.76518e-05	1.89174e-05	2	49165000	89680000	5000
chr11	65275000	65280000	chr11	65320000	65325000	.	.	.	.	255255	588	251.833	298.113	353.565	316.211	5.80182e-38	7.2818e-38	1.26912e-15	1.24931e-15	18	65273333	65319722	18183
chr11	46885000	46890000	chr11	47150000	47155000	.	.	.	.	255255	792	237.775	205.777	217.642	336.658	0	0	0	0	19	46890657	47154868	13021
chr11	19070000	19075000	chr11	19900000	19905000	.	.	.	.	255255	75	30.4064	30.2589	35.0443	28.2991	1.29519e-07	1.84664e-07	0.000412976	2.10871e-07	1	19072500	19902500	0
chr11	14535000	14540000	chr11	14640000	14645000	.	.	.	.	255255	169	73.9067	67.248	83.0884	73.6154	3.79439e-15	4.05481e-15	1.20732e-07	5.72033e-15	1	14537500	14642500	0
chr11	8005000	8010000	chr11	8095000	8100000	.	.	.	.	255255	543	190.859	156.092	168.45	228.941	0	0	0	0	20	8014000	8092250	30697
chr11	112220000	112225000	chr11	112275000	112280000	.	.	.	.	255255	907	159.843	149.363	159.948	177.976	0	0	0	0	25	112223700	112277300	20236
chr11	55080000	55085000	chr11	55115000	55120000	.	.	.	.	255255	280	94.9245	151.918	122.021	141.22	0	2.6488e-15	3.48355e-15	3.54828e-15	1	55082500	55117500	0
chr11	78645000	78650000	chr11	79100000	79105000	.	.	.	.	255255	151	65.045	60.973	95.3054	57.7346	5.33419e-10	2.2252e-17	0.000257944	3.40174e-17	1	78647500	79102500	0
chr11	57665000	57670000	chr11	58575000	58580000	.	.	.	.	255255	134	64.4569	50.8734	59.8221	50.8094	4.95107e-06	1.1904e-11	1.57418e-11	1.69198e-11	1	57667500	58577500	0
chr11	75720000	75725000	chr11	75865000	75870000	.	.	.	.	255255	193	64.111	70.4737	85.4547	81.6047	2.41735e-23	2.38924e-23	2.06122e-13	2.09408e-13	8	75720000	75868125	16214
chr11	128020000	128025000	chr11	128635000	128640000	.	.	.	.	255255	126	65.846	60.9307	70.4427	70.3786	0.00017056	2.80017e-09	0.000248754	0.000253445	4	128025000	128640000	3536
chr11	12960000	12970000	chr11	13150000	13160000	.	.	.	.	255255	959	368.567	373.341	512.233	381.741	0	0	5.30503e-29	0	5	12963000	13169000	17889
chr11	128690000	128695000	chr11	128840000	128845000	.	.	.	.	255255	101	45.0434	48.8752	43.9961	61.0839	2.06679e-07	0.00181363	3.00006e-07	0.00195411	1	128692500	128842500	0
chr11	36295000	36300000	chr11	36745000	36750000	.	.	.	.	255255	155	48.0022	49.5532	67.1045	50.8547	3.91797e-28	7.44188e-19	6.78261e-11	1.16434e-18	7	36293214	36743928	7726
chr11	35605000	35610000	chr11	36255000	36260000	.	.	.	.	255255	298	126.581	144.911	156.154	179.208	8.01256e-20	8.93262e-20	2.23817e-08	2.28538e-08	18	35615277	36266388	15113
chr11	56080000	56085000	chr11	56275000	56280000	.	.	.	.	255255	118	58.584	63.5593	53.619	69.5082	3.06809e-07	0.00475027	4.5336e-07	0.00500635	1	56082500	56277500	0
chr11	56555000	56560000	chr11	56605000	56610000	.	.	.	.	255255	161	29.5051	48.7439	61.3073	56.6326	0	5.13362e-31	5.75183e-21	6.0485e-21	5	56561500	56620500	18439
chr11	58670000	58675000	chr11	59155000	59160000	.	.	.	.	255255	120	47.8931	57.4388	48.1276	64.875	1.75774e-13	1.17942e-07	2.49526e-13	0.00249839	3	58659166	59150833	14908
chr11	15045000	15050000	chr11	15130000	15135000	.	.	.	.	255255	103	51.2638	57.3014	58.4798	56.8179	0.000559848	0.00078338	0.000825771	0.000859544	1	15047500	15132500	0
chr11	128470000	128475000	chr11	128755000	128760000	.	.	.	.	255255	144	77.485	66.2891	64.0537	74.4133	0.00190311	3.58848e-08	4.39412e-08	4.4207e-08	1	128472500	128757500	0
chr11	4625000	4630000	chr11	5380000	5385000	.	.	.	.	255255	93	27.1701	26.8123	29.5011	31.7351	9.42515e-15	1.29822e-14	1.57287e-14	2.35939e-09	8	4631875	5380625	10789
chr11	66070000	66080000	chr11	66120000	66130000	.	.	.	.	255255	1821	774.816	843.426	879.952	914.638	0	0	0	0	6	66071666	66128333	14908
chr11	113310000	113320000	chr11	113870000	113880000	.	.	.	.	255255	227	116.296	103.989	144.691	97.917	8.37982e-13	1.22712e-12	8.35901e-05	1.69108e-12	2	113315000	113880000	5000
chr11	2840000	2845000	chr11	2875000	2880000	.	.	.	.	255255	299	128.189	154.077	171.816	156.716	4.38689e-20	1.27369e-08	1.54279e-08	1.57637e-08	1	2842500	2877500	0
chr11	74255000	74260000	chr11	74445000	74450000	.	.	.	.	255255	201	71.8565	63.4119	68.5164	75.7063	2.21917e-26	2.1506e-26	3.37965e-26	3.52577e-26	9	74255833	74449722	8624
chr11	48725000	48730000	chr11	55125000	55130000	.	.	.	.	255255	320	5.88025	5.21012	4.32911	14.12	0	0	0	0	8	48730000	55126250	12562
chr11	75020000	75025000	chr11	75140000	75145000	.	.	.	.	255255	362	165.277	152.258	184.636	162.41	1.0627e-21	2.29909e-39	1.64058e-21	1.71532e-21	9	75024722	75139166	8625
chr11	111930000	111940000	chr11	111980000	111990000	.	.	.	.	255255	1404	578.959	638.649	638.759	674.636	0	0	0	0	5	111933000	111987000	14422
chr11	385000	390000	chr11	570000	575000	.	.	.	.	255255	110	47.4853	41.3757	40.6377	39.8926	4.26843e-10	5.01115e-10	6.13735e-10	6.53864e-10	1	387500	572500	0
chr11	17235000	17240000	chr11	17500000	17505000	.	.	.	.	255255	201	79.3958	103.724	130.958	106.773	7.935e-16	1.57434e-07	0.037232	1.94299e-07	14	17227500	17510000	18200
chr11	66220000	66225000	chr11	66255000	66260000	.	.	.	.	255255	635	221.268	234.958	255.141	259.766	0	0	0	0	4	66222500	66258750	8004
chr11	95705000	95710000	chr11	96425000	96430000	.	.	.	.	255255	106	54.1333	41.7365	39.2182	59.0598	0.000149485	8.88343e-09	1.07069e-08	0.000229462	2	95710000	96427500	2500
chr11	83290000	83295000	chr11	83815000	83820000	.	.	.	.	255255	180	62.6256	50.2691	46.7085	74.2961	1.00291e-18	4.72537e-29	1.01185e-40	1.52151e-18	7	83298928	83813928	17743
chr11	70810000	70815000	chr11	71415000	71420000	.	.	.	.	255255	119	36.42	33.5723	37.7267	39.0223	5.26254e-20	6.07128e-20	7.9153e-20	6.06909e-13	4	70815000	71417500	5590
chr11	85730000	85735000	chr11	85780000	85785000	.	.	.	.	255255	159	20.4405	49.2926	62.5824	61.8886	0	2.24964e-20	5.2486e-12	5.36018e-12	1	85732500	85782500	0
chr11	126715000	126720000	chr11	126990000	126995000	.	.	.	.	255255	423	115.195	114.936	148.571	133.382	0	0	0	0	20	126718250	126988750	16267
chr11	57750000	57755000	chr11	57800000	57805000	.	.	.	.	255255	637	259.537	264.149	296.598	293.28	0	0	0	0	15	57753833	57799500	13068
chr11	31240000	31245000	chr11	31870000	31875000	.	.	.	.	255255	113	51.762	54.9202	66.6285	56.2491	4.8059e-06	6.18008e-06	0.0237613	7.44357e-06	3	31239166	31870833	3728
chr11	57120000	57125000	chr11	57155000	57160000	.	.	.	.	255255	204	89.5025	108.778	83.7925	132.277	1.06155e-16	4.18393e-08	1.64598e-16	0.0198719	2	57112500	57157500	10000
chr11	119665000	119670000	chr11	120105000	120110000	.	.	.	.	255255	372	88.0251	105.485	106.811	142.043	0	0	0	0	12	119664583	120107083	12597
chr11	128755000	128760000	chr11	128830000	128835000	.	.	.	.	255255	390	178.657	180.737	197.921	217.959	4.74615e-29	5.38144e-29	4.53886e-13	4.39204e-13	7	128757500	128835357	21237
chr11	57660000	57665000	chr11	57800000	57805000	.	.	.	.	255255	536	296.21	256.887	236.328	350.643	1.32428e-25	1.73675e-25	0	1.86615e-08	7	57665357	57795357	13171
chr11	4100000	4110000	chr11	5690000	5700000	.	.	.	.	255255	110	58.7828	45.383	45.6327	53.031	4.96362e-05	1.90631e-09	1.94424e-09	0.000108813	1	4105000	5695000	0
chr11	210000	215000	chr11	515000	520000	.	.	.	.	255255	204	94.6629	73.9625	87.7028	91.4423	1.06155e-16	1.42797e-27	1.64598e-16	1.66083e-16	8	209375	513125	15130
chr11	31490000	31495000	chr11	32170000	32175000	.	.	.	.	255255	86	34.5903	37.1831	39.1704	45.0133	2.8116e-07	3.71457e-07	0.00121928	0.00127238	3	31492500	32174166	6010
chr11	86590000	86600000	chr11	88430000	88440000	.	.	.	.	255255	63	25.7713	27.2086	30.4637	25.3488	0.000778668	0.00191763	0.00177885	0.00179827	1	86595000	88435000	0
chr11	67260000	67265000	chr11	67380000	67385000	.	.	.	.	255255	378	138.288	122.299	177.101	128.101	0	0	1.30988e-25	0	10	67266500	67387500	14866
chr11	1655000	1660000	chr11	1690000	1695000	.	.	.	.	255255	161	45.7891	76.2515	65.043	65.5289	5.07067e-31	1.06129e-12	1.39706e-12	1.43503e-12	2	1655000	1692500	2500
chr11	2695000	2700000	chr11	2895000	2900000	.	.	.	.	255255	161	78.8415	69.4531	77.5731	64.3917	3.13166e-06	1.06129e-12	4.73448e-06	1.43503e-12	3	2699166	2890833	6872
chr11	128025000	128030000	chr11	128155000	128160000	.	.	.	.	255255	473	187.972	162.364	190.119	171.359	0	0	0	0	20	128033500	128156000	16530
chr11	4390000	4395000	chr11	4490000	4495000	.	.	.	.	255255	210	99.1233	99.706	104.096	107.701	2.09812e-09	2.58682e-09	3.21833e-09	3.2909e-09	4	4395000	4487500	13463
chr11	102285000	102290000	chr11	102340000	102345000	.	.	.	.	255255	526	227.193	211.033	348.164	204.623	0	0	2.62458e-07	0	1	102287500	102342500	0
chr11	18240000	18245000	chr11	18525000	18530000	.	.	.	.	255255	216	90.8068	87.8573	103.947	90.6802	2.20022e-20	2.23863e-20	1.70427e-10	3.48979e-20	2	18242500	18522500	5000
chr11	46935000	46940000	chr11	47245000	47250000	.	.	.	.	255255	110	38.986	49.4512	52.7932	47.124	4.26843e-10	2.93936e-05	3.29865e-05	6.53864e-10	2	46937500	47250000	2500
chr11	34920000	34925000	chr11	35305000	35310000	.	.	.	.	255255	167	75.2858	75.0771	107.487	73.4391	1.56475e-14	1.69342e-14	0.019634	2.36699e-14	2	34927500	35307500	5000
chr11	71080000	71085000	chr11	71415000	71420000	.	.	.	.	255255	118	56.6148	45.7211	57.5213	57.5081	3.06809e-07	1.0096e-12	4.5336e-07	4.77265e-07	4	71083750	71418750	6374
chr11	78645000	78650000	chr11	78715000	78720000	.	.	.	.	255255	560	213.754	210.414	214.662	210.014	0	0	0	0	11	78650227	78714772	13017
chr11	58575000	58580000	chr11	58785000	58790000	.	.	.	.	255255	167	65.96	68.9056	56.8943	95.0825	1.56475e-14	1.69342e-14	2.37362e-23	3.20416e-07	4	58570000	58787500	7500
chr11	67080000	67085000	chr11	67380000	67385000	.	.	.	.	255255	142	71.9101	65.8054	73.627	73.7449	8.74059e-08	1.07187e-07	1.29653e-07	1.3086e-07	2	67090000	67382500	7500
chr11	3975000	3980000	chr11	4025000	4030000	.	.	.	.	255255	169	77.5054	95.3385	92.3348	95.9187	8.0135e-08	9.9526e-08	1.20732e-07	1.23289e-07	1	3977500	4027500	0
chr11	6020000	6025000	chr11	6315000	6320000	.	.	.	.	255255	233	87.7992	99.4641	132.904	101.251	4.14733e-26	1.22411e-14	4.7942e-06	1.68581e-14	4	6018750	6313750	6374
chr11	8735000	8740000	chr11	8810000	8815000	.	.	.	.	255255	205	93.7679	102.744	117.962	116.474	5.37759e-17	2.66162e-08	3.25711e-08	3.31926e-08	1	8737500	8812500	0
chr11	128300000	128305000	chr11	128725000	128730000	.	.	.	.	255255	260	102.202	145.283	163.785	130.54	3.48957e-22	6.2154e-11	0.00237296	7.92111e-11	4	128308750	128730000	9100
chr11	54900000	54910000	chr11	55630000	55640000	.	.	.	.	255255	158	79.9897	76.0686	81.8168	89.7443	2.54989e-05	3.25202e-11	5.24461e-05	5.25853e-05	1	54905000	55635000	0
chr11	23020000	23025000	chr11	23110000	23115000	.	.	.	.	255255	262	97.0134	90.4286	98.5817	99.5672	8.64557e-23	3.63631e-37	1.35357e-22	1.35834e-22	4	23022500	23105000	7500
chr11	62465000	62470000	chr11	62535000	62540000	.	.	.	.	255255	292	120.525	142.417	154.75	167.013	1.18106e-32	3.13619e-18	1.96037e-07	1.99269e-07	7	62472500	62545357	31012
chr11	61795000	61800000	chr11	61945000	61950000	.	.	.	.	255255	233	62.6751	71.9682	84.0752	87.961	7.0277e-40	6.51936e-40	6.54233e-26	6.63572e-26	1	61797500	61947500	0
chr11	111925000	111930000	chr11	112285000	112290000	.	.	.	.	255255	106	57.4302	50.7084	51.4867	58.2142	0.000149485	0.00020399	0.000221188	0.000229462	6	111930833	112280833	7454
chr11	2925000	2930000	chr11	3090000	3095000	.	.	.	.	255255	110	44.636	39.5485	39.3656	51.7301	4.26843e-10	5.01115e-10	6.13735e-10	3.4501e-05	2	2927500	3095000	2500
chr11	2425000	2430000	chr11	2530000	2535000	.	.	.	.	255255	510	105.886	78.7303	83.6922	93.0548	0	0	0	0	23	2432065	2523804	16963
chr11	11795000	11800000	chr11	12235000	12240000	.	.	.	.	255255	114	43.2937	52.5265	71.5431	52.0266	2.11683e-11	3.61053e-06	0.0177004	4.38673e-06	1	11797500	12237500	0
chr11	47010000	47020000	chr11	50650000	50660000	.	.	.	.	255255	14	1.10809	1.53623	1.96825	1.49055	1.07409e-05	0.000335219	0.00548015	0.000373023	1	47015000	50655000	0
chr11	126440000	126445000	chr11	128155000	128160000	.	.	.	.	255255	31	7.38553	7.24086	6.81757	8.2706	4.62725e-06	1.83501e-05	1.83617e-05	0.000961784	1	126442500	128157500	0
chr11	109980000	109990000	chr11	111370000	111380000	.	.	.	.	255255	188	74.7421	96.0143	100.804	119.836	4.27616e-21	1.22161e-11	9.17633e-05	9.41724e-05	2	109980000	111375000	5000
chr11	116730000	116735000	chr11	117100000	117105000	.	.	.	.	255255	199	75.5908	80.8216	85.7209	106.956	1.30712e-25	3.21152e-15	4.542e-15	4.554e-07	4	116732500	117111250	11250
chr11	450000	455000	chr11	500000	505000	.	.	.	.	255255	456	226.605	225.303	193.918	247.472	2.15272e-27	2.64628e-27	3.383e-27	9.47014e-11	7	453928	503928	21309
chr11	48175000	48180000	chr11	49520000	49525000	.	.	.	.	255255	37	12.1109	10.6448	10.7848	15.2768	9.86311e-05	0.000246373	0.000215383	0.00982497	2	48172500	49525000	5590
chr11	1635000	1640000	chr11	2150000	2155000	.	.	.	.	255255	174	94.8919	79.6321	72.91	105.612	6.60978e-09	8.00871e-09	1.43933e-16	0.00316064	2	1637500	2147500	5000
chr11	19315000	19320000	chr11	19545000	19550000	.	.	.	.	255255	445	233.437	203.683	210.733	272.988	9.83254e-25	1.22494e-24	1.57709e-24	3.44514e-09	19	19318026	19550394	16645
chr11	96185000	96190000	chr11	96335000	96340000	.	.	.	.	255255	546	221.37	247.689	241.671	352.967	0	1.05041e-27	0	1.13012e-09	5	96194500	96341500	18028
chr11	128555000	128560000	chr11	128625000	128630000	.	.	.	.	255255	529	245.638	220.924	263.827	265.646	4.1563e-24	0	6.246e-24	6.35406e-24	15	128560833	128617833	15691
chr11	19560000	19565000	chr11	19900000	19905000	.	.	.	.	255255	490	94.3306	79.608	108.372	87.574	0	0	0	0	18	19565000	19902222	15481
chr11	42765000	42770000	chr11	43280000	43285000	.	.	.	.	255255	344	85.8666	72.9266	86.2157	91.7691	0	0	0	0	17	42770147	43281323	16659
chr11	49630000	49635000	chr11	88990000	88995000	.	.	.	.	255255	28	0.225007	0.174674	0.0301434	0.25369	1.40864e-21	7.32284e-21	3.83566e-21	3.08221e-21	1	49632500	88992500	0
chr11	9315000	9320000	chr11	9720000	9725000	.	.	.	.	255255	118	47.9578	61.8587	75.5576	62.5348	9.0143e-13	0.00475027	0.00491609	0.00500635	3	9314166	9734166	12133
chr11	120330000	120335000	chr11	120505000	120510000	.	.	.	.	255255	382	205.795	146.804	197.296	127.886	6.56851e-12	0	1.12378e-11	0	6	120335833	120500833	13743
chr11	128630000	128635000	chr11	128830000	128835000	.	.	.	.	255255	421	160.533	158.435	182.501	205.258	3.17939e-38	3.4532e-38	4.64541e-38	3.7137e-19	12	128633750	128837083	13604
chr11	103680000	103685000	chr11	103920000	103925000	.	.	.	.	255255	193	78.9669	73.6301	96.1412	76.3135	1.34968e-13	2.38924e-23	2.06122e-13	3.78672e-23	7	103683928	103925357	9036
chr11	120510000	120515000	chr11	120950000	120955000	.	.	.	.	255255	267	65.7653	61.6375	85.8112	59.5596	0	0	5.98667e-39	0	1	120512500	120952500	0
chr11	113305000	113310000	chr11	113730000	113735000	.	.	.	.	255255	129	41.0223	41.6263	61.7876	41.6191	7.44542e-17	7.95351e-17	7.04945e-05	1.10843e-16	3	113307500	113732500	5000
chr11	75895000	75900000	chr11	76200000	76205000	.	.	.	.	255255	200	67.3769	69.0208	114.793	62.22	5.37923e-26	5.24196e-26	2.90882e-07	8.55727e-26	1	75897500	76202500	0
chr11	75325000	75330000	chr11	75380000	75385000	.	.	.	.	255255	639	201.127	219.133	244.696	292.437	0	0	0	0	13	75333269	75380192	14417
chr11	56490000	56495000	chr11	56530000	56535000	.	.	.	.	255255	159	59.9704	70.1196	93.537	53.7456	2.2179e-20	4.01476e-12	1.11037e-05	3.58165e-20	3	56489166	56535833	7454
chr11	125625000	125630000	chr11	125870000	125875000	.	.	.	.	255255	179	69.0862	78.9384	73.9588	117.471	2.18517e-18	5.55939e-10	3.22499e-18	0.00071176	2	125625000	125872500	2500
chr11	131580000	131585000	chr11	131670000	131675000	.	.	.	.	255255	319	103.592	97.639	104.122	116.74	0	0	0	0	13	131583653	131674423	14452
chr11	9395000	9400000	chr11	9750000	9755000	.	.	.	.	255255	120	62.0415	54.7685	55.5214	66.3275	0.00170085	1.17942e-07	1.4167e-07	0.00249839	2	9397500	9745000	7500
chr11	57115000	57120000	chr11	57250000	57255000	.	.	.	.	255255	322	138.253	137.817	149.769	168.722	1.6891e-26	1.78259e-26	2.55151e-26	1.22169e-12	14	57114285	57249642	15258
chr11	128885000	128890000	chr11	128955000	128960000	.	.	.	.	255255	1088	230.071	220.468	264.852	275.177	0	0	0	0	27	128886944	128955092	20014
chr11	121465000	121470000	chr11	121575000	121580000	.	.	.	.	255255	715	356.123	367.866	361.734	417.751	1.9991e-41	2.5774e-41	2.8176e-41	1.03751e-15	10	121459500	121582000	19474
chr11	81785000	81790000	chr11	82230000	82235000	.	.	.	.	255255	141	65.2048	67.3856	75.3893	74.1281	1.48714e-07	1.83642e-07	2.20566e-07	2.22781e-07	3	81787500	82225833	8333
chr11	14300000	14305000	chr11	14455000	14460000	.	.	.	.	255255	469	145.162	173.036	252.626	180.36	0	0	9.5635e-13	0	12	14298750	14457083	15332
chr11	4175000	4180000	chr11	4995000	5000000	.	.	.	.	255255	57	28.5731	23.8383	22.7329	27.8434	0.0109157	0.000113268	0.000112159	0.0173495	4	4187500	5002500	11180
chr11	32585000	32590000	chr11	32790000	32795000	.	.	.	.	255255	130	54.3156	55.8739	65.0963	70.646	1.68033e-10	1.94844e-10	4.56049e-05	4.63523e-05	1	32587500	32792500	0
chr11	90685000	90690000	chr11	92075000	92080000	.	.	.	.	255255	34	1.36838	1.54381	2.20555	1.3721	3.10362e-27	1.19712e-26	1.05366e-20	1.12019e-26	4	90687500	92075000	7500
chr11	44725000	44730000	chr11	44890000	44895000	.	.	.	.	255255	450	173.84	200.381	220.941	223.605	0	7.77266e-26	9.9959e-26	9.57834e-26	19	44726447	44904342	17897
chr11	74920000	74930000	chr11	75200000	75210000	.	.	.	.	255255	837	294.435	339.67	500.37	317.457	0	0	1.16947e-11	0	11	74927727	75227727	27409
chr11	36040000	36045000	chr11	36255000	36260000	.	.	.	.	255255	190	98.5815	87.8295	91.8501	104.916	1.03168e-05	9.59324e-13	1.29187e-12	1.62938e-05	5	36042500	36264500	9434
chr11	17380000	17385000	chr11	17500000	17505000	.	.	.	.	255255	408	126.076	135.659	201.598	146.339	0	0	1.81498e-16	0	3	17387500	17502500	5000
chr11	124665000	124670000	chr11	124835000	124840000	.	.	.	.	255255	597	166.103	203.391	266.586	210.253	0	0	3.57938e-40	0	13	124662500	124843653	31124
chr11	78075000	78080000	chr11	78560000	78565000	.	.	.	.	255255	125	51.9924	53.3963	54.2775	76.0062	4.46084e-09	5.32963e-09	6.60977e-09	0.000378976	1	78077500	78562500	0
chr11	23110000	23120000	chr11	26270000	26280000	.	.	.	.	255255	120	58.0578	53.6052	63.9148	58.2692	2.28703e-07	4.42287e-07	0.00743301	4.97144e-07	1	23115000	26275000	0
chr11	74255000	74260000	chr11	74565000	74570000	.	.	.	.	255255	101	47.7426	44.5074	43.3982	50.7917	2.06679e-07	2.57159e-07	3.00006e-07	0.00195411	2	74257500	74570000	2500
chr11	4635000	4640000	chr11	5005000	5010000	.	.	.	.	255255	235	52.7698	49.0434	59.3458	50.363	0	0	0	0	19	4633552	5002763	16419
chr11	117130000	117135000	chr11	117205000	117210000	.	.	.	.	255255	271	39.5982	40.093	37.002	40.3415	0	0	0	0	5	117127500	117207500	10000
chr11	73350000	73355000	chr11	73390000	73395000	.	.	.	.	255255	976	420.688	377.695	384.04	383.306	0	0	0	0	6	73350833	73395000	8700
chr11	74700000	74705000	chr11	75245000	75250000	.	.	.	.	255255	116	42.5077	41.0764	44.6043	42.5769	4.45156e-12	5.03711e-12	6.3586e-12	6.79382e-12	2	74700000	75247500	2500
chr11	6380000	6385000	chr11	6675000	6680000	.	.	.	.	255255	170	60.8471	61.5874	89.5229	59.5218	8.95648e-25	1.96393e-15	7.42078e-08	1.45602e-24	6	6385000	6687500	21360
chr11	120505000	120510000	chr11	120680000	120685000	.	.	.	.	255255	579	246.972	217.828	288.667	238.839	1.12632e-35	0	1.60274e-35	0	13	120513269	120683269	14847
chr11	34240000	34250000	chr11	34350000	34360000	.	.	.	.	255255	1560	726.908	725.495	747.752	941.607	0	0	0	0	5	34247000	34351000	12649
chr11	7900000	7910000	chr11	8570000	8580000	.	.	.	.	255255	114	51.3915	52.58	60.5253	56.8124	6.53377e-06	1.3042e-05	1.40284e-05	1.44064e-05	1	7905000	8575000	0
chr11	6600000	6610000	chr11	6670000	6680000	.	.	.	.	255255	1873	942.342	934.836	1015.35	1095.1	0	0	0	0	7	6613571	6677857	15452
chr11	9530000	9535000	chr11	9970000	9975000	.	.	.	.	255255	93	39.2356	40.4934	39.3481	55.0507	2.39854e-05	3.22769e-05	3.52623e-05	0.0336439	2	9530000	9972500	2500
chr11	73185000	73190000	chr11	73335000	73340000	.	.	.	.	255255	308	152.627	134.796	161.7	158.839	1.66437e-22	1.81658e-22	4.63104e-10	4.76497e-10	5	73189500	73341500	10000
chr11	6480000	6485000	chr11	6605000	6610000	.	.	.	.	255255	325	168.324	159.51	163.434	160.634	1.85854e-13	2.42959e-13	3.00433e-13	3.13394e-13	8	6480000	6610000	17678
chr11	14645000	14650000	chr11	14900000	14905000	.	.	.	.	255255	94	44.5251	46.3125	48.5406	55.8783	1.37618e-05	1.83159e-05	2.0182e-05	0.0245165	2	14645000	14905000	3536
chr11	32530000	32535000	chr11	32565000	32570000	.	.	.	.	255255	270	112.686	135.618	126.125	154.713	2.79493e-25	4.90074e-13	6.32001e-13	0.000191772	1	32532500	32567500	0
chr11	107575000	107580000	chr11	107685000	107690000	.	.	.	.	255255	515	164.106	176.715	180.972	265.852	0	0	0	4.8383e-21	17	107570147	107687794	31338
chr11	3220000	3230000	chr11	3410000	3420000	.	.	.	.	255255	147	48.5103	60.7911	87.5527	61.5078	2.77217e-24	2.74659e-15	0.00298856	3.02528e-08	1	3225000	3415000	0
chr11	50270000	50275000	chr11	50320000	50325000	.	.	.	.	255255	114	20.9319	17.1452	11.2779	17.4711	1.86903e-33	0	0	0	1	50272500	50322500	0
chr11	57345000	57350000	chr11	57455000	57460000	.	.	.	.	255255	321	114.831	116.79	191.801	106.737	0	0	1.83444e-12	0	9	57351944	57462500	25392
chr11	45250000	45260000	chr11	45770000	45780000	.	.	.	.	255255	178	100.093	88.3125	85.8678	102.039	0.00126326	3.52181e-09	4.21268e-09	0.00247784	1	45255000	45775000	0
chr11	33690000	33695000	chr11	33985000	33990000	.	.	.	.	255255	112	60.9508	55.1867	46.9707	63.8938	8.10571e-06	1.04902e-05	1.39435e-10	0.0322234	2	33702500	33987500	10000
chr11	18115000	18120000	chr11	18200000	18205000	.	.	.	.	255255	331	132.091	127	142.469	145.87	3.27578e-29	3.37891e-29	4.96023e-29	5.10153e-29	6	18117500	18200000	20156
chr11	58650000	58655000	chr11	58785000	58790000	.	.	.	.	255255	264	107.483	93.9095	92.1054	129.832	2.10613e-23	5.55345e-38	1.01179e-37	1.2089e-11	8	58653750	58786875	9783
chr11	73480000	73485000	chr11	73655000	73660000	.	.	.	.	255255	159	68.4785	74.4595	89.4932	84.0452	3.555e-12	4.01476e-12	1.11037e-05	1.13004e-05	1	73482500	73657500	0
chr11	99015000	99020000	chr11	99735000	99740000	.	.	.	.	255255	99	40.6664	37.635	38.9472	39.4604	7.23779e-07	1.32646e-11	1.05442e-06	1.12504e-06	3	99020833	99739166	6872
chr11	95060000	95065000	chr11	95710000	95715000	.	.	.	.	255255	176	93.1643	84.0078	88.9009	93.6751	2.33967e-09	2.80453e-09	3.54131e-09	3.61042e-09	6	95070000	95710000	12748
chr11	37945000	37950000	chr11	38790000	38795000	.	.	.	.	255255	99	21.8953	22.6702	26.7532	26.8292	2.85713e-24	5.31718e-24	2.74937e-17	2.87392e-17	3	37947500	38792500	5000
chr11	40300000	40305000	chr11	41205000	41210000	.	.	.	.	255255	69	34.1199	28.3022	23.635	34.4803	0.00508857	1.63765e-05	5.67202e-09	0.00799629	4	40310000	41203750	8385
chr11	45110000	45120000	chr11	45290000	45300000	.	.	.	.	255255	837	290.833	311.566	456.123	307.933	0	0	1.6856e-37	0	3	45111666	45291666	7453
chr11	7350000	7355000	chr11	7690000	7695000	.	.	.	.	255255	292	106.284	105.949	139.96	120.644	1.18106e-32	1.10493e-32	4.24261e-18	1.8584e-32	10	7354500	7691000	13829
chr11	12960000	12965000	chr11	13235000	13240000	.	.	.	.	255255	169	51.2635	43.9515	59.3396	42.3722	2.31911e-24	5.11675e-35	3.62299e-24	7.80118e-35	4	12963750	13237500	5154
chr11	43320000	43325000	chr11	43355000	43360000	.	.	.	.	255255	290	125.943	141.454	182.025	109.289	8.75297e-18	9.9802e-18	3.9228e-07	9.34977e-32	1	43322500	43357500	0
chr11	10405000	10410000	chr11	10485000	10490000	.	.	.	.	255255	209	100.828	104.478	129.554	102.267	3.36485e-09	4.1716e-09	0.00619963	5.28399e-09	2	10407500	10492500	5000
chr11	95065000	95070000	chr11	95140000	95145000	.	.	.	.	255255	643	273.909	241.198	249.911	330.503	0	0	0	2.10064e-25	15	95073500	95140166	22541
chr11	11025000	11030000	chr11	11785000	11790000	.	.	.	.	255255	499	133.5	104.493	121.729	125.908	0	0	0	0	20	11035250	11785500	21600
chr11	72825000	72830000	chr11	73175000	73180000	.	.	.	.	255255	428	188.11	181.04	211.018	241.091	1.94035e-40	2.10011e-40	1.18536e-20	1.14318e-20	19	72830921	73176710	23265
chr11	35005000	35010000	chr11	35085000	35090000	.	.	.	.	255255	798	386.921	403.991	513.422	418.253	1.5622e-29	1.74613e-29	3.12771e-07	1.48168e-29	12	35013750	35073750	37956
chr11	66690000	66695000	chr11	66830000	66835000	.	.	.	.	255255	708	130.193	112.386	145.299	151.565	0	0	0	0	24	66695625	66829166	16647
chr11	82710000	82715000	chr11	83820000	83825000	.	.	.	.	255255	154	74.9773	66.0168	62.7902	91.5443	8.54668e-11	9.85682e-11	1.26722e-10	8.4786e-05	6	82718333	83820000	9501
chr11	69295000	69300000	chr11	69545000	69550000	.	.	.	.	255255	202	93.2636	104.394	117.208	90.8029	4.08255e-16	1.0175e-07	1.23022e-07	6.37252e-16	1	69297500	69547500	0
chr11	61895000	61900000	chr11	61945000	61950000	.	.	.	.	255255	467	162.33	160.725	141.225	197.181	0	0	0	5.40707e-30	13	61896730	61949038	24476
chr11	45110000	45115000	chr11	45330000	45335000	.	.	.	.	255255	545	150.91	127.052	185.016	120.944	0	0	0	0	11	45114318	45331590	10093
chr11	131745000	131750000	chr11	132025000	132030000	.	.	.	.	255255	149	55.7912	60.6025	66.5427	64.5173	1.12105e-16	1.17386e-16	2.59333e-09	2.60326e-09	3	131749166	132029166	3727
chr11	34995000	35000000	chr11	35235000	35240000	.	.	.	.	255255	320	89.9743	106.387	130.84	110.705	0	0	9.88561e-26	0	9	35000277	35239166	12336
chr11	94530000	94535000	chr11	94885000	94890000	.	.	.	.	255255	115	49.8514	60.8335	69.3559	66.924	1.63807e-06	2.08893e-06	0.0130437	0.0132428	5	94522500	94897500	14142
chr11	33790000	33795000	chr11	34350000	34355000	.	.	.	.	255255	154	74.1815	77.6253	79.7818	85.4598	8.54668e-11	7.40637e-05	8.33791e-05	8.4786e-05	3	33797500	34354166	13018
chr11	63000000	63010000	chr11	63890000	63900000	.	.	.	.	255255	108	48.3094	56.5377	58.7934	57.2313	3.64226e-09	0.000265141	0.00028111	0.000284434	1	63005000	63895000	0
chr11	69290000	69295000	chr11	69640000	69645000	.	.	.	.	255255	212	45.7246	51.0056	57.5458	62.329	0	0	0	1.41506e-30	6	69294166	69642500	10138
chr11	85855000	85860000	chr11	86815000	86820000	.	.	.	.	255255	94	38.0019	36.5366	34.6626	38.7296	6.7198e-10	8.56785e-10	1.03514e-09	1.06275e-09	4	85856250	86812500	10078
chr11	59750000	59755000	chr11	59915000	59920000	.	.	.	.	255255	143	47.8058	50.9265	39.161	60.0274	1.15486e-22	1.43048e-14	1.65979e-22	2.12195e-14	3	59749166	59919166	10672
chr11	55585000	55590000	chr11	55665000	55670000	.	.	.	.	255255	177	87.6739	87.0644	114.441	83.8074	1.37843e-09	1.64462e-09	0.00128404	2.12848e-09	6	55585000	55672500	18200
chr11	73350000	73355000	chr11	73660000	73665000	.	.	.	.	255255	473	176.908	139.605	164.098	197.174	0	0	0	1.47673e-31	9	73350277	73661944	13111
chr11	74255000	74260000	chr11	74320000	74325000	.	.	.	.	255255	331	132.856	139.213	152.535	152.698	3.27578e-29	3.37891e-29	4.96023e-29	5.10153e-29	7	74256071	74319642	16675
chr11	10620000	10625000	chr11	10735000	10740000	.	.	.	.	255255	349	124.109	119.463	124.115	169.482	5.93187e-35	0	9.04751e-35	2.17161e-18	9	10621944	10731944	14455
chr11	82865000	82870000	chr11	83820000	83825000	.	.	.	.	255255	151	65.5838	56.7501	56.8458	78.8418	5.33419e-10	2.2252e-17	3.20252e-17	0.000262387	5	82866500	83817500	9000
chr11	34585000	34590000	chr11	35390000	35395000	.	.	.	.	255255	224	48.5032	69.2841	74.8181	75.3583	0	6.61853e-36	1.14444e-35	1.20057e-35	12	34584583	35398333	14464
chr11	19560000	19565000	chr11	20130000	20135000	.	.	.	.	255255	145	56.9894	48.6249	55.0732	53.0666	2.75777e-15	1.56669e-23	4.08869e-15	4.41653e-15	1	19562500	20132500	0
chr11	120230000	120235000	chr11	120300000	120305000	.	.	.	.	255255	785	142.521	140.646	146.8	189.247	0	0	0	0	24	120239791	120298958	17112
chr11	23020000	23025000	chr11	23540000	23545000	.	.	.	.	255255	117	40.3122	44.0906	53.7505	42.9187	2.01831e-12	2.26954e-12	7.98252e-07	3.06963e-12	2	23022500	23547500	5000
chr11	117425000	117430000	chr11	117805000	117810000	.	.	.	.	255255	282	137.822	121.898	149.65	123.238	7.6418e-16	3.20196e-29	1.18439e-15	1.20337e-15	13	117433269	117807115	15712
chr11	103680000	103685000	chr11	104150000	104155000	.	.	.	.	255255	235	64.7353	66.5336	81.4887	66.0597	9.1034e-41	8.3355e-41	1.27719e-26	1.59653e-40	12	103682083	104155833	12535
chr11	57660000	57670000	chr11	59100000	59110000	.	.	.	.	255255	143	68.5812	61.7435	77.8252	64.6051	1.26554e-07	2.33413e-07	0.0104462	2.73047e-07	1	57665000	59105000	0
chr11	72025000	72030000	chr11	72075000	72080000	.	.	.	.	255255	829	413.44	458.112	539.914	548.422	1.1005e-35	1.18245e-35	2.3924e-10	2.12986e-10	25	72029500	72087300	23496
chr11	59720000	59725000	chr11	59770000	59775000	.	.	.	.	255255	214	33.0612	78.8384	135.008	90.4028	0	9.69861e-20	0.00173176	1.49807e-19	1	59722500	59772500	0
chr11	22875000	22880000	chr11	23115000	23120000	.	.	.	.	255255	106	52.9973	50.7439	53.1722	52.58	0.000149485	0.00020399	0.000221188	0.000229462	4	22876250	23110000	13050
chr11	1200000	1210000	chr11	1510000	1520000	.	.	.	.	255255	239	113.119	107.397	134.054	121.899	7.97416e-16	1.11749e-15	1.29186e-06	1.61053e-15	1	1205000	1515000	0
chr11	16940000	16950000	chr11	17500000	17510000	.	.	.	.	255255	284	132.831	135.809	151.116	157.007	6.00873e-16	8.02188e-16	1.07962e-15	5.75102e-06	5	16941000	17513000	12649
chr11	34175000	34180000	chr11	34355000	34360000	.	.	.	.	255255	761	163.83	149.619	167.972	220.976	0	0	0	0	19	34172236	34357236	15648
chr11	57490000	57495000	chr11	57525000	57530000	.	.	.	.	255255	748	234.532	233.464	225.332	275.162	0	0	0	0	5	57484500	57524500	12369
chr11	102340000	102345000	chr11	102610000	102615000	.	.	.	.	255255	980	242.294	236.998	256.988	364.153	0	0	0	0	12	102343333	102613750	14222
chr11	55665000	55670000	chr11	55735000	55740000	.	.	.	.	255255	112	41.2281	46.6602	50.2901	56.2372	9.68255e-11	1.12608e-10	1.1971e-05	1.25436e-05	1	55667500	55737500	0
chr11	112285000	112290000	chr11	112555000	112560000	.	.	.	.	255255	183	76.049	72.523	100.962	77.1665	9.44061e-20	9.53131e-20	0.000190035	1.42877e-19	1	112287500	112557500	0
chr11	130205000	130210000	chr11	130865000	130870000	.	.	.	.	255255	192	73.1153	80.9993	105.801	86.7723	5.66705e-23	2.80526e-13	7.43399e-06	3.8828e-13	11	130214318	130862500	11818
chr11	96010000	96015000	chr11	96390000	96395000	.	.	.	.	255255	281	126.706	120.883	132.08	143.14	1.31445e-15	6.95886e-29	2.03383e-15	2.0687e-15	3	96010833	96390833	3727
chr11	35820000	35830000	chr11	36260000	36270000	.	.	.	.	255255	393	191.069	156.819	152.488	198.999	1.42072e-29	1.53169e-29	0	2.22168e-13	5	35825000	36263000	18000
chr11	59550000	59560000	chr11	60450000	60460000	.	.	.	.	255255	102	48.225	46.8117	57.4484	45.4099	2.20926e-07	4.92863e-07	0.00387213	5.02029e-07	1	59555000	60455000	0
chr11	40160000	40165000	chr11	40210000	40215000	.	.	.	.	255255	209	29.0263	59.8619	89.9489	68.7184	0	0	5.24156e-18	2.37861e-29	1	40162500	40212500	0
chr11	62790000	62795000	chr11	62835000	62840000	.	.	.	.	255255	645	307.996	339.187	402.984	346.652	6.10339e-26	7.76407e-26	2.94284e-07	8.46441e-26	24	62781041	62862291	59425
chr11	28695000	28700000	chr11	29320000	29325000	.	.	.	.	255255	92	43.9111	51.711	49.7813	59.7356	4.11806e-05	0.0452496	0.0446559	0.0455551	2	28697500	29330000	7500
chr11	31240000	31245000	chr11	32180000	32185000	.	.	.	.	255255	112	41.7941	44.4117	50.6897	48.5778	9.68255e-11	1.12608e-10	1.1971e-05	1.49113e-10	9	31240833	32176944	14540
chr11	250000	255000	chr11	355000	360000	.	.	.	.	255255	374	150.317	176.686	184.144	225.222	0	1.14215e-24	1.47729e-24	2.30417e-10	6	256666	360000	17989
chr11	49095000	49100000	chr11	49145000	49150000	.	.	.	.	255255	61	13.0633	20.3828	19.6091	24.1639	1.19511e-13	5.39732e-06	5.55e-06	5.65477e-06	1	49097500	49147500	0
chr11	87350000	87355000	chr11	88550000	88555000	.	.	.	.	255255	111	34.4901	34.3442	36.8219	42.355	1.77326e-16	2.07579e-16	2.64705e-16	3.14245e-10	7	87354642	88550357	8361
chr11	123640000	123645000	chr11	123705000	123710000	.	.	.	.	255255	506	157.685	151.288	158.233	157.574	0	0	0	0	22	123641590	123708636	15590
chr11	123110000	123115000	chr11	123475000	123480000	.	.	.	.	255255	254	74.1869	88.4692	100.085	103.597	0	5.73688e-34	3.27458e-20	3.28437e-20	10	123109500	123479000	9014
chr11	94520000	94525000	chr11	94600000	94605000	.	.	.	.	255255	595	186.629	162.102	186.263	212.494	0	0	0	0	24	94525416	94600833	17994
chr11	123300000	123305000	chr11	123405000	123410000	.	.	.	.	255255	657	268.126	284.967	386.047	279.625	0	0	1.73468e-08	0	2	123302500	123410000	2500
chr11	48085000	48090000	chr11	48135000	48140000	.	.	.	.	255255	90	16.5281	30.1916	35.1573	43.332	1.09877e-25	2.68376e-13	2.32287e-08	0.000184351	1	48087500	48137500	0
chr11	27300000	27305000	chr11	27475000	27480000	.	.	.	.	255255	169	83.4286	88.7755	89.7938	100.655	8.0135e-08	9.9526e-08	1.20732e-07	0.0121451	2	27300000	27485000	7906
chr11	47370000	47375000	chr11	47405000	47410000	.	.	.	.	255255	819	248.117	279.79	264.787	279.215	0	0	0	0	9	47371944	47411944	14928
chr11	59170000	59175000	chr11	59205000	59210000	.	.	.	.	255255	837	187.257	194.975	214.27	193.913	0	0	0	0	5	59168500	59208500	9849
chr11	61895000	61900000	chr11	62105000	62110000	.	.	.	.	255255	592	224.375	182.19	253.109	211.181	0	0	7.41884e-39	0	15	61898833	62093833	37352
chr11	89095000	89100000	chr11	90110000	90115000	.	.	.	.	255255	41	3.49008	6.46241	6.99979	6.4253	2.43657e-22	1.11139e-11	1.54211e-11	1.3378e-11	4	89100000	90115000	3536
chr11	55810000	55815000	chr11	55845000	55850000	.	.	.	.	255255	159	53.3348	58.9172	29.278	88.0093	2.2179e-20	2.24964e-20	0	1.13004e-05	6	55804166	55850000	8701
chr11	90245000	90250000	chr11	91245000	91250000	.	.	.	.	255255	47	8.56784	7.9361	8.02154	10.1852	5.38212e-13	2.07389e-12	2.74518e-12	3.80684e-09	1	90247500	91247500	0
chr11	102495000	102500000	chr11	102610000	102615000	.	.	.	.	255255	877	312.349	289.066	287.574	415.41	0	0	0	0	6	102497500	102613333	10035
chr11	50270000	50275000	chr11	50560000	50565000	.	.	.	.	255255	47	11.0968	12.8745	20.4022	9.92727	1.30649e-09	2.91236e-06	0.0371535	3.80684e-09	2	50272500	50572500	10000
chr11	49455000	49460000	chr11	89245000	89250000	.	.	.	.	255255	101	0.380299	0.498675	0.752653	0.494876	0	0	0	0	2	49457500	89245000	2500
chr11	6630000	6640000	chr11	8680000	8690000	.	.	.	.	255255	70	28.3183	29.2094	32.7698	37.9208	7.74452e-06	2.08743e-05	0.0128732	0.012784	2	6625000	8685000	10000
chr11	88100000	88105000	chr11	88540000	88545000	.	.	.	.	255255	434	120.957	125.343	130.432	165.29	0	0	0	2.639e-42	15	88103500	88546500	16643
chr11	2185000	2190000	chr11	2520000	2525000	.	.	.	.	255255	140	63.1788	54.6974	67.8137	60.3593	2.5084e-07	1.43884e-13	3.72231e-07	2.11121e-13	4	2195000	2522500	19526
chr11	19560000	19565000	chr11	19735000	19740000	.	.	.	.	255255	517	159.514	144.684	201.648	164.977	0	0	0	0	21	19565833	19742023	14618
chr11	111450000	111455000	chr11	111840000	111845000	.	.	.	.	255255	104	52.9204	45.9831	46.8762	51.0588	0.000364349	3.54759e-08	4.17011e-08	0.000559582	4	111456250	111840000	6731
chr11	1650000	1655000	chr11	1830000	1835000	.	.	.	.	255255	122	42.3885	33.0383	36.8194	39.7438	3.3012e-14	2.5001e-21	3.26042e-21	5.0406e-14	3	1652500	1832500	5000
chr11	20125000	20130000	chr11	20610000	20615000	.	.	.	.	255255	163	67.7141	52.0042	58.7558	64.5648	2.4741e-13	6.10751e-22	9.47604e-22	3.74224e-13	9	20134722	20606388	25939
chr11	88105000	88110000	chr11	88485000	88490000	.	.	.	.	255255	151	57.0122	70.4236	81.9998	61.1307	2.15433e-17	6.252e-10	0.000257944	3.40174e-17	1	88107500	88487500	0
chr11	34920000	34930000	chr11	35230000	35240000	.	.	.	.	255255	1003	528.497	458.012	602.88	483.488	3.91823e-37	0	5.83659e-37	6.06752e-37	7	34926428	35237857	15453
chr11	75275000	75280000	chr11	75380000	75385000	.	.	.	.	255255	744	226.7	198.775	233.484	256.98	0	0	0	0	24	75281041	75382708	15346
chr11	2035000	2040000	chr11	2150000	2155000	.	.	.	.	255255	497	99.3101	101.024	126.374	127.645	0	0	0	0	20	2033500	2151500	14213
chr11	75445000	75450000	chr11	75530000	75535000	.	.	.	.	255255	1133	258.65	262.105	316.314	331.147	0	0	0	0	30	75446833	75529500	54919
chr11	129360000	129365000	chr11	129745000	129750000	.	.	.	.	255255	399	157.938	139.688	153.943	164.034	1.32784e-31	0	1.96653e-31	2.0944e-31	16	129367812	129751562	15341
chr11	44560000	44565000	chr11	44610000	44615000	.	.	.	.	255255	911	365.291	337.399	400.321	372.539	0	0	0	0	21	44561309	44612976	19892
chr11	45650000	45655000	chr11	45770000	45775000	.	.	.	.	255255	129	63.494	55.6392	53.8288	64.4604	4.81301e-05	3.84441e-10	4.90447e-10	7.17906e-05	1	45652500	45772500	0
chr11	118195000	118200000	chr11	118565000	118570000	.	.	.	.	255255	119	54.373	61.0111	64.7454	71.7635	1.72031e-07	2.13288e-07	0.00349654	0.00355213	2	118197500	118565000	2500
chr11	48305000	48310000	chr11	49995000	50000000	.	.	.	.	255255	41	11.9069	10.0595	9.82731	9.5891	1.55491e-06	4.1545e-06	1.21529e-08	1.05054e-08	2	48307500	49995000	2500
chr11	115330000	115335000	chr11	116215000	116220000	.	.	.	.	255255	215	93.622	105.506	137.112	94.6914	4.59305e-20	2.21875e-10	0.00132348	7.23515e-20	3	115330833	116222500	5271
chr11	15100000	15105000	chr11	15205000	15210000	.	.	.	.	255255	409	110.75	114.362	140.956	126.406	0	0	0	0	16	15100937	15209062	14954
chr11	18730000	18735000	chr11	18765000	18770000	.	.	.	.	255255	548	235.48	287.326	324.152	236.352	0	3.7103e-28	6.40888e-10	0	5	18729500	18778500	24083
chr11	112285000	112290000	chr11	112795000	112800000	.	.	.	.	255255	121	55.5914	48.9741	55.7277	50.9574	5.28545e-08	6.44395e-08	7.81256e-08	8.20524e-08	2	112290000	112797500	2500
chr11	50240000	50245000	chr11	50415000	50420000	.	.	.	.	255255	68	25.1716	27.7461	18.1877	36.2445	2.18558e-05	3.26271e-05	1.1511e-12	0.0122384	2	50240000	50417500	2500
chr11	50080000	50085000	chr11	50155000	50160000	.	.	.	.	255255	79	12.9465	21.9334	28.057	31.5451	7.21526e-25	1.86999e-13	7.63943e-09	4.30486e-05	1	50082500	50157500	0
chr11	119355000	119360000	chr11	119470000	119475000	.	.	.	.	255255	496	124.094	106.89	117.117	158.246	0	0	0	0	13	119353653	119473269	16171
chr11	73965000	73970000	chr11	74025000	74030000	.	.	.	.	255255	494	240.319	252.033	275.731	259.701	1.8577e-37	4.27433e-17	5.03305e-17	5.13804e-17	11	73974772	74027500	20129
chr11	63670000	63675000	chr11	63890000	63895000	.	.	.	.	255255	141	66.2813	70.02	80.15	74.6257	1.48714e-07	1.83642e-07	0.00707146	2.22781e-07	1	63672500	63892500	0
chr11	19935000	19940000	chr11	20600000	20605000	.	.	.	.	255255	75	28.9652	30.9378	28.2387	37.7479	1.29519e-07	0.000395584	2.00864e-07	0.000422453	2	19937500	20595000	7500
chr11	93895000	93900000	chr11	94505000	94510000	.	.	.	.	255255	125	48.056	43.6065	44.1006	72.9984	2.54625e-15	2.76668e-15	3.64358e-15	0.000378976	8	93905625	94501875	13140
chr11	79705000	79710000	chr11	81230000	81235000	.	.	.	.	255255	39	10.9573	10.9527	12.0947	12.3614	1.32394e-05	3.42053e-05	3.13664e-05	3.03629e-05	3	79709166	81235833	3728
chr11	66575000	66580000	chr11	66830000	66835000	.	.	.	.	255255	155	47.8327	60.3114	59.4189	75.2997	3.91797e-28	7.44188e-19	1.09863e-18	6.93216e-11	4	66572500	66835000	5590
chr11	20645000	20650000	chr11	20870000	20875000	.	.	.	.	255255	123	59.882	52.2543	57.2139	59.3363	1.55933e-08	1.88039e-08	2.30601e-08	2.43303e-08	1	20647500	20872500	0
chr11	48005000	48010000	chr11	48105000	48110000	.	.	.	.	255255	479	216.185	206.609	215.075	259.442	2.52995e-33	2.99084e-33	3.85039e-33	2.19585e-14	1	48007500	48107500	0
chr11	55590000	55595000	chr11	55690000	55695000	.	.	.	.	255255	116	38.8955	36.6362	54.111	37.0579	4.45156e-12	1.37593e-18	1.39504e-06	1.90377e-18	1	55592500	55692500	0
chr11	49400000	49405000	chr11	89295000	89300000	.	.	.	.	255255	15	0.133017	0.109581	0.0200501	0.149217	4.54868e-06	1.60697e-05	1.09711e-05	1.00169e-05	1	49402500	89297500	0
chr11	93395000	93400000	chr11	93430000	93435000	.	.	.	.	255255	287	116.126	152.145	178.13	88.8999	6.50787e-31	5.51285e-17	1.07991e-06	0	2	93397500	93440000	7500
chr11	95150000	95155000	chr11	96425000	96430000	.	.	.	.	255255	126	40.0855	36.2129	42.3691	43.1052	1.06919e-15	3.14088e-23	1.52428e-15	1.60054e-15	11	95155681	96427045	14265
chr11	4640000	4645000	chr11	4785000	4790000	.	.	.	.	255255	115	53.3312	55.0214	72.4185	47.4872	1.63807e-06	2.08893e-06	0.0130437	1.49404e-11	1	4642500	4787500	0
chr11	12965000	12970000	chr11	13340000	13345000	.	.	.	.	255255	171	50.0311	56.6123	71.3624	66.8823	3.46295e-25	3.37815e-25	1.30567e-15	1.34458e-15	9	12962500	13342500	11180
chr11	133075000	133080000	chr11	133835000	133840000	.	.	.	.	255255	170	70.9888	54.4344	58.6177	62.207	1.84079e-15	8.76025e-25	1.40114e-24	2.7818e-15	13	133082884	133829038	12427
chr11	36295000	36300000	chr11	36345000	36350000	.	.	.	.	255255	332	44.7451	83.6794	125.403	84.4508	0	0	2.44744e-29	0	2	36295000	36352500	5590
chr11	57450000	57455000	chr11	57490000	57495000	.	.	.	.	255255	398	155.181	197.446	264.618	109.009	2.57907e-31	1.23499e-14	0.000699073	0	2	57452500	57490000	2500
chr11	122795000	122800000	chr11	123020000	123025000	.	.	.	.	255255	233	64.1766	76.9557	94.9514	87.666	7.0277e-40	6.51936e-40	6.54233e-26	6.63572e-26	9	122794722	123026388	12826
chr11	83240000	83245000	chr11	83815000	83820000	.	.	.	.	255255	106	36.2917	31.1015	25.7555	53.1104	2.08107e-14	2.49698e-14	1.05232e-20	0.000229462	2	83240000	83817500	2500
chr11	121650000	121655000	chr11	122505000	122510000	.	.	.	.	255255	168	41.1454	34.6652	34.7446	47.6627	1.65404e-34	0	0	2.50693e-34	15	121657500	122506500	15033
chr11	250000	255000	chr11	515000	520000	.	.	.	.	255255	217	86.8172	91.0391	76.9766	105.627	1.05065e-20	1.06519e-20	1.11828e-32	1.04512e-10	1	252500	517500	0
chr11	34065000	34070000	chr11	34100000	34105000	.	.	.	.	255255	584	283.84	317.249	268.323	358.738	6.14286e-37	4.79501e-15	8.66429e-37	5.25309e-15	6	34065000	34106666	20582
chr11	2530000	2535000	chr11	2885000	2890000	.	.	.	.	255255	509	79.3219	67.0408	85.8432	79.3316	0	0	0	0	26	2536538	2885576	24706
chr11	1265000	1270000	chr11	1630000	1635000	.	.	.	.	255255	146	68.2166	62.583	59.484	76.1177	9.71216e-09	1.16528e-08	1.85536e-15	1.45186e-08	1	1267500	1632500	0
chr11	60365000	60370000	chr11	60480000	60485000	.	.	.	.	255255	883	287.914	266.157	387.24	322.72	0	0	0	0	31	60368145	60468467	22959
chr11	104605000	104610000	chr11	105860000	105865000	.	.	.	.	255255	77	22.7944	24.7024	28.6569	27.7067	9.60064e-13	3.65486e-08	3.99995e-08	4.2192e-08	2	104607500	105865000	2500
chr11	11790000	11795000	chr11	12285000	12290000	.	.	.	.	255255	133	67.1205	55.4965	64.7472	65.1842	7.94005e-06	2.42356e-11	1.16968e-05	1.18594e-05	11	11797500	12282954	10985
chr11	62420000	62430000	chr11	62550000	62560000	.	.	.	.	255255	1607	749.64	716.149	782.57	885.492	0	0	0	0	10	62422000	62549000	26926
chr11	1700000	1705000	chr11	1915000	1920000	.	.	.	.	255255	103	31.0239	45.1009	61.2769	39.791	3.20628e-13	6.93189e-08	0.000825771	8.7619e-08	1	1702500	1917500	0
chr11	60480000	60485000	chr11	60760000	60765000	.	.	.	.	255255	196	94.4833	80.5047	75.6888	112.527	2.0428e-14	2.25325e-14	2.7702e-24	1.57601e-06	2	60485000	60762500	2500
chr11	83835000	83840000	chr11	84520000	84525000	.	.	.	.	255255	99	42.0238	42.9618	60.339	40.5055	7.23779e-07	9.17878e-07	0.00412958	1.12504e-06	2	83835000	84522500	2500
chr11	47640000	47645000	chr11	47765000	47770000	.	.	.	.	255255	140	63.6818	71.7853	82.0336	63.5985	2.5084e-07	3.11756e-07	0.0094614	3.75553e-07	1	47642500	47767500	0
chr11	118905000	118910000	chr11	118955000	118960000	.	.	.	.	255255	773	191.329	220.74	349.133	296.043	0	0	0	0	14	118908214	118952142	15717
chr11	45870000	45875000	chr11	46005000	46010000	.	.	.	.	255255	229	101.178	104.402	117.308	106.432	1.07172e-13	1.22725e-13	1.65997e-13	1.66951e-13	7	45868214	46007500	30714
chr11	9750000	9755000	chr11	9970000	9975000	.	.	.	.	255255	296	140.897	107.979	99.3351	149.548	2.65003e-19	4.15382e-34	6.91364e-34	4.10933e-19	16	9761875	9971562	13039
chr11	67400000	67410000	chr11	67460000	67470000	.	.	.	.	255255	1367	612.596	687.317	881.845	761.289	0	0	4.64094e-23	4.55834e-23	14	67407142	67491428	53879
chr11	126445000	126450000	chr11	127075000	127080000	.	.	.	.	255255	112	51.1467	47.5432	51.1822	56.3877	8.10571e-06	1.12608e-10	1.1971e-05	1.25436e-05	2	126442500	127077500	5000
chr11	57350000	57355000	chr11	57800000	57805000	.	.	.	.	255255	135	59.6377	70.0665	75.4795	64.167	5.19238e-12	3.94892e-06	4.54377e-06	4.59002e-06	1	57352500	57802500	0
chr11	5120000	5125000	chr11	5805000	5810000	.	.	.	.	255255	103	31.9423	36.9966	41.0699	40.7663	3.20628e-13	3.9193e-13	8.17618e-08	8.7619e-08	2	5122500	5810000	2500
chr11	131695000	131700000	chr11	132025000	132030000	.	.	.	.	255255	107	48.1413	45.9007	52.1963	46.5547	3.68947e-09	4.38405e-09	0.000139234	5.69125e-09	1	131697500	132027500	0
chr11	5120000	5125000	chr11	5290000	5295000	.	.	.	.	255255	163	61.7016	65.4094	75.0196	65.8366	2.4741e-13	2.73297e-13	3.6261e-13	3.74224e-13	2	5125000	5292500	2500
chr11	8225000	8230000	chr11	8565000	8570000	.	.	.	.	255255	419	106.837	119.709	140.536	162.447	0	0	0	2.08466e-37	11	8227500	8567954	17780
chr11	2210000	2215000	chr11	2285000	2290000	.	.	.	.	255255	178	83.7422	92.775	105.563	92.4392	8.07695e-10	9.59491e-10	0.00094697	1.24521e-09	1	2212500	2287500	0
chr11	54650000	54660000	chr11	54900000	54910000	.	.	.	.	255255	145	64.1934	74.0306	82.2402	80.4102	4.24753e-08	7.80428e-08	0.0056686	0.00567379	2	54655000	54910000	5000
chr11	73135000	73140000	chr11	73175000	73180000	.	.	.	.	255255	681	360.368	329.763	361.718	356.097	1.6534e-33	2.13404e-33	2.36556e-33	2.33385e-33	2	73140000	73177500	2500
chr11	50540000	50545000	chr11	50680000	50685000	.	.	.	.	255255	187	93.4144	77.9946	97.768	88.2429	5.10573e-12	5.83605e-12	4.75318e-05	7.92188e-12	2	50540000	50682500	2500
chr11	112795000	112800000	chr11	113285000	113290000	.	.	.	.	255255	145	61.1532	49.5677	50.1569	66.1962	2.75777e-15	2.96312e-15	4.08869e-15	2.54592e-08	4	112795000	113290000	3536
chr11	3340000	3350000	chr11	3400000	3410000	.	.	.	.	255255	757	258.32	200.571	255.353	202.371	0	0	0	0	4	3347500	3405000	10308
chr11	34510000	34515000	chr11	35385000	35390000	.	.	.	.	255255	136	58.6022	67.8378	76.6387	66.218	2.52837e-12	2.41621e-06	2.79833e-06	2.82694e-06	4	34511250	35392500	5154
chr11	119480000	119485000	chr11	119640000	119645000	.	.	.	.	255255	162	79.2462	69.9457	91.3061	70.3869	2.02593e-06	5.39309e-13	3.0589e-06	7.34204e-13	2	119482500	119637500	5000
chr11	103925000	103930000	chr11	104150000	104155000	.	.	.	.	255255	192	48.0711	47.1348	54.8062	56.55	0	0	2.76278e-34	3.00809e-34	14	103929285	104155357	15257
chr11	48305000	48310000	chr11	49520000	49525000	.	.	.	.	255255	62	14.8866	13.9266	16.1613	18.1405	3.27718e-14	7.6416e-14	8.80878e-10	9.40636e-10	8	48308750	49525625	8221
chr11	41260000	41270000	chr11	42450000	42460000	.	.	.	.	255255	102	45.7261	54.607	55.9803	56.1505	2.20926e-07	0.00368474	0.00387213	0.0038543	1	41265000	42455000	0
chr11	31480000	31485000	chr11	31800000	31805000	.	.	.	.	255255	145	67.9416	71.2445	71.8299	79.2092	1.70152e-08	2.05306e-08	2.52666e-08	0.00207428	1	31482500	31802500	0
chr11	131745000	131750000	chr11	132940000	132945000	.	.	.	.	255255	72	22.7408	23.1875	23.9127	24.7544	1.68208e-10	2.7196e-10	3.23762e-10	2.06705e-06	3	131749166	132940833	3728
chr11	62220000	62230000	chr11	62690000	62700000	.	.	.	.	255255	129	56.391	60.2585	57.4125	75.6125	8.17693e-10	1.56946e-09	1.73495e-09	0.000232094	1	62225000	62695000	0
chr11	111600000	111605000	chr11	111775000	111780000	.	.	.	.	255255	867	195.813	215.15	267.428	285.538	0	0	0	0	26	111597884	111773846	21928
chr11	57710000	57715000	chr11	57800000	57805000	.	.	.	.	255255	721	334.954	292.661	234.858	445.116	4.58e-43	0	0	1.41094e-16	2	57707500	57802500	5000
chr11	26295000	26300000	chr11	26650000	26655000	.	.	.	.	255255	272	65.5793	63.2512	79.7643	76.0488	0	0	4.5874e-41	0	18	26293333	26650555	15952
chr11	8030000	8035000	chr11	8095000	8100000	.	.	.	.	255255	466	157.958	169.515	195.876	271.843	0	0	1.01179e-29	2.86207e-12	5	8036500	8092500	11662
chr11	1880000	1885000	chr11	1915000	1920000	.	.	.	.	255255	355	125.361	170.282	133.386	128.951	5.86166e-37	6.40086e-20	9.01161e-37	9.19972e-37	2	1880000	1917500	2500
chr11	128170000	128175000	chr11	128775000	128780000	.	.	.	.	255255	275	103.579	108.861	162.781	94.4907	6.91186e-27	6.83242e-27	4.5875e-05	0	8	128171875	128762500	15013
chr11	66330000	66335000	chr11	66675000	66680000	.	.	.	.	255255	104	48.994	43.946	41.1251	47.0564	0.000364349	3.54759e-08	4.17011e-08	4.49195e-08	1	66332500	66677500	0
chr11	126715000	126720000	chr11	127075000	127080000	.	.	.	.	255255	157	69.6493	73.2027	84.9535	79.972	1.29497e-11	1.4692e-11	2.53625e-05	2.58044e-05	4	126717500	127075000	5590
chr11	48690000	48700000	chr11	54990000	55000000	.	.	.	.	255255	39	13.8871	14.5872	14.8097	15.3851	0.00178074	0.00480735	0.00471182	0.0043172	1	48695000	54995000	0
chr11	109950000	109955000	chr11	110370000	110375000	.	.	.	.	255255	287	148.445	115.593	132.792	132.668	4.80588e-17	6.17386e-31	7.38194e-17	7.48464e-17	15	109946833	110368500	12374
chr11	112220000	112230000	chr11	112580000	112590000	.	.	.	.	255255	493	265.613	238.399	277.752	261.025	7.51599e-17	6.1681e-37	1.10724e-16	1.14116e-16	4	112220000	112577500	13463
chr11	13210000	13220000	chr11	13340000	13350000	.	.	.	.	255255	1477	506.981	546.967	551.326	860.685	0	0	0	1.17881e-38	8	13215000	13345000	36056
chr11	36700000	36705000	chr11	36745000	36750000	.	.	.	.	255255	1180	232.608	237.301	283.964	282.42	0	0	0	0	13	36701730	36747115	10777
chr11	5120000	5125000	chr11	5380000	5385000	.	.	.	.	255255	345	72.986	74.8778	86.1424	94.3456	0	0	0	0	18	5124166	5381111	13713
chr11	57560000	57570000	chr11	58520000	58530000	.	.	.	.	255255	193	87.765	96.2954	106.522	115.263	3.68143e-13	5.85181e-13	1.44279e-05	1.49474e-05	3	57565000	58515000	10000
chr11	118195000	118200000	chr11	118290000	118295000	.	.	.	.	255255	591	123.466	137.782	182.27	149.619	0	0	0	0	10	118198500	118289000	16530
chr11	47270000	47275000	chr11	47410000	47415000	.	.	.	.	255255	212	105.197	114.916	127.388	140.823	8.01408e-10	9.8234e-10	0.00292618	0.00295567	8	47264375	47415625	13722
chr11	107740000	107745000	chr11	107895000	107900000	.	.	.	.	255255	273	94.6612	92.3051	102.52	120.022	9.282e-42	8.291e-42	4.81937e-26	4.85682e-26	9	107741388	107898611	8958
chr11	40300000	40305000	chr11	43280000	43285000	.	.	.	.	255255	46	10.5465	10.0912	4.93033	11.5714	4.55383e-09	1.20209e-08	1.24791e-22	1.29576e-08	2	40307500	43282500	5000
chr11	35610000	35615000	chr11	36130000	36135000	.	.	.	.	255255	230	79.966	92.0665	116.914	93.161	4.66031e-25	4.53981e-25	9.42432e-14	7.46272e-25	11	35616590	36137954	14574
chr11	92940000	92945000	chr11	93220000	93225000	.	.	.	.	255255	225	76.5974	75.5231	102.145	82.6963	2.60708e-36	2.42873e-36	1.52522e-12	3.83236e-23	15	92942500	93224833	15878
chr11	11450000	11455000	chr11	11620000	11625000	.	.	.	.	255255	107	49.091	51.7964	48.9934	52.9694	9.42874e-05	0.00012765	0.000139234	0.00014527	1	11452500	11622500	0
chr11	9625000	9630000	chr11	9960000	9965000	.	.	.	.	255255	112	39.723	54.4567	57.5978	69.726	9.68255e-11	1.04902e-05	1.1971e-05	0.0322234	3	9627500	9962500	10000
chr11	66695000	66700000	chr11	66880000	66885000	.	.	.	.	255255	270	98.2445	92.8334	131.186	84.9787	2.79493e-25	1.81423e-40	6.32001e-13	3.35692e-40	5	66699500	66885500	13342
chr11	17225000	17230000	chr11	17380000	17385000	.	.	.	.	255255	216	78.1784	65.1121	90.8398	64.1085	2.20022e-20	1.7964e-32	3.43565e-20	3.1292e-32	2	17230000	17382500	2500
[truncated: 26,342 more rows]
