# Supplementary material for: An integrative TAD catalog in lymphoblastoid cell lines discloses the functional impact of deletions and insertions in human genomes
Source: HighWire-hosted journal article supplement (doi:10.1101/gr.279419.124), 2024-12-01
Supplement: Supplemental_Table_S16.xlsx [file Supplemental_Table_S16.xlsx]

## Sheet: Table S17
Table S16. The compartment locations of the Integrative Catalog
chr	start	end	domain type	domain score
chr1	1	300000	B	-0.00120687	.
chr1	300001	500000	A	0	.
chr1	500001	700000	B	-0.00277084	.
chr1	700001	4100000	A	0.0178468	.
chr1	4100001	5600000	B	-0.00313066	.
chr1	5600001	12900000	A	0.0223777	.
chr1	12900001	13100000	B	-0.0026422	.
chr1	13100001	14100000	A	0.00651672	.
chr1	14100001	14400000	B	-0.000371144	.
chr1	14400001	46900000	A	0.0215185	.
chr1	46900001	47100000	B	-0.00270147	.
chr1	47100001	47500000	A	0.0108142	.
chr1	47500001	50700000	B	-0.0182223	.
chr1	50700001	55300000	A	0.0184532	.
chr1	55300001	58500000	B	-0.0184796	.
chr1	58500001	59700000	A	0.00668045	.
chr1	59700001	61700000	B	-0.023078	.
chr1	61700001	61800000	A	0.00228532	.
chr1	61800001	62400000	B	-0.0112288	.
chr1	62400001	62800000	A	0.00866628	.
chr1	62800001	63400000	B	-0.0127253	.
chr1	63400001	63600000	A	0.00238532	.
chr1	63600001	64900000	B	-0.0193144	.
chr1	64900001	65000000	A	0.000507981	.
chr1	65000001	66300000	B	-0.0210425	.
chr1	66300001	66400000	A	0.00727889	.
chr1	66400001	66900000	B	-0.0202599	.
chr1	66900001	67000000	A	0.00346986	.
chr1	67000001	67100000	B	-0.000301978	.
chr1	67100001	67500000	A	0.00393491	.
chr1	67500001	70200000	B	-0.0259683	.
chr1	70200001	70300000	A	0.000597633	.
chr1	70300001	77600000	B	-0.0271737	.
chr1	77600001	78000000	A	0.00719159	.
chr1	78000001	84500000	B	-0.0263475	.
chr1	84500001	84600000	A	0.00338946	.
chr1	84600001	84900000	B	-0.00774769	.
chr1	84900001	85100000	A	0.00401314	.
chr1	85100001	86800000	B	-0.0202987	.
chr1	86800001	87100000	A	0.00450336	.
chr1	87100001	88700000	B	-0.022306	.
chr1	88700001	90000000	A	0.00731832	.
chr1	90000001	92300000	B	-0.018042	.
chr1	92300001	92600000	A	0.00998546	.
chr1	92600001	92700000	B	-0.0014968	.
chr1	92700001	93400000	A	0.0153842	.
chr1	93400001	93600000	B	-0.00143997	.
chr1	93600001	93900000	A	0.0111391	.
chr1	93900001	99800000	B	-0.0241734	.
chr1	99800001	100500000	A	0.00910792	.
chr1	100500001	100900000	B	-0.0180734	.
chr1	100900001	101400000	A	0.00675407	.
chr1	101400001	108600000	B	-0.0254014	.
chr1	108600001	113400000	A	0.0216349	.
chr1	113400001	113600000	B	-0.0039389	.
chr1	113600001	114800000	A	0.016206	.
chr1	114800001	115600000	B	-0.00910773	.
chr1	115600001	115700000	A	0.00346623	.
chr1	115700001	116100000	B	-0.00418143	.
chr1	116100001	117200000	A	0.0142755	.
chr1	117200001	117300000	B	-0.00255636	.
chr1	117300001	117700000	A	0.00931546	.
chr1	117700001	119600000	B	-0.016064	.
chr1	119600001	119700000	A	0.00785147	.
chr1	119700001	119900000	B	-0.00151784	.
chr1	119900001	121000000	A	0.00344654	.
chr1	121000001	121200000	B	-0.00150586	.
chr1	121200001	121400000	A	0.0009574	.
chr1	121400001	121700000	B	-0.0151968	.
chr1	121700001	121900000	A	0.00127416	.
chr1	121900001	122600000	B	-0.00136814	.
chr1	122600001	124700000	A	0	.
chr1	124700001	124800000	B	-0.0021709	.
chr1	124800001	124900000	A	0.00183682	.
chr1	124900001	125200000	B	-0.0126742	.
chr1	125200001	143200000	A	5.61865e-06	.
chr1	143200001	143900000	B	-0.00700969	.
chr1	143900001	144600000	A	0.00292655	.
chr1	144600001	144700000	B	-0.000972032	.
chr1	144700001	158200000	A	0.0171735	.
chr1	158200001	159000000	B	-0.0108843	.
chr1	159000001	159100000	A	0.0140619	.
chr1	159100001	159800000	B	-0.0149369	.
chr1	159800001	162100000	A	0.0210073	.
chr1	162100001	162500000	B	-0.00430334	.
chr1	162500001	162700000	A	0.00505715	.
chr1	162700001	165600000	B	-0.0248529	.
chr1	165600001	165900000	A	0.00480276	.
chr1	165900001	167200000	B	-0.0198998	.
chr1	167200001	168600000	A	0.0129116	.
chr1	168600001	168900000	B	-0.00211025	.
chr1	168900001	169200000	A	0.00886793	.
chr1	169200001	169300000	B	-0.000705983	.
chr1	169300001	169900000	A	0.00448943	.
chr1	169900001	171500000	B	-0.0229184	.
chr1	171500001	171800000	A	0.00751019	.
chr1	171800001	172100000	B	-0.00858224	.
chr1	172100001	172900000	A	0.00600946	.
chr1	172900001	173200000	B	-0.006028	.
chr1	173200001	173500000	A	0.0116394	.
chr1	173500001	173700000	B	-0.00206022	.
chr1	173700001	174500000	A	0.0128573	.
chr1	174500001	174700000	B	-0.00160769	.
chr1	174700001	175300000	A	0.00984481	.
chr1	175300001	176100000	B	-0.00854278	.
chr1	176100001	176200000	A	0.000415225	.
chr1	176200001	178600000	B	-0.0242574	.
chr1	178600001	178700000	A	0.00308166	.
chr1	178700001	179000000	B	-0.00836864	.
chr1	179000001	179400000	A	0.00547865	.
chr1	179400001	179800000	B	-0.0227631	.
chr1	179800001	181200000	A	0.0122982	.
chr1	181200001	181300000	B	-0.00167445	.
chr1	181300001	181700000	A	0.00558412	.
chr1	181700001	182000000	B	-0.00650592	.
chr1	182000001	184000000	A	0.0142821	.
chr1	184000001	184700000	B	-0.011094	.
chr1	184700001	184900000	A	0.00234287	.
chr1	184900001	192500000	B	-0.0256641	.
chr1	192500001	192600000	A	0.000109645	.
chr1	192600001	198600000	B	-0.0251371	.
chr1	198600001	198700000	A	0.00216826	.
chr1	198700001	200300000	B	-0.0171444	.
chr1	200300001	208200000	A	0.0230505	.
chr1	208200001	209600000	B	-0.0116747	.
chr1	209600001	209800000	A	0.00991192	.
chr1	209800001	211200000	B	-0.0172005	.
chr1	211200001	213100000	A	0.0183897	.
chr1	213100001	220000000	B	-0.0249309	.
chr1	220000001	220200000	A	0.00241981	.
chr1	220200001	221700000	B	-0.0214921	.
chr1	221700001	221900000	A	0.00718845	.
chr1	221900001	222600000	B	-0.0155114	.
chr1	222600001	222700000	A	0.00534111	.
chr1	222700001	223700000	B	-0.0149477	.
chr1	223700001	224500000	A	0.0110823	.
chr1	224500001	225400000	B	-0.0213779	.
chr1	225400001	225500000	A	0.00651197	.
chr1	225500001	225700000	B	-0.00642904	.
chr1	225700001	227000000	A	0.0195202	.
chr1	227000001	227700000	B	-0.0103306	.
chr1	227700001	227800000	A	0.00418967	.
chr1	227800001	228000000	B	-0.00546329	.
chr1	228000001	230500000	A	0.0156226	.
chr1	230500001	230600000	B	-0.000925117	.
chr1	230600001	231600000	A	0.0107784	.
chr1	231600001	233600000	B	-0.0110007	.
chr1	233600001	233700000	A	0.00520945	.
chr1	233700001	234100000	B	-0.013698	.
chr1	234100001	236600000	A	0.0177832	.
chr1	236600001	243100000	B	-0.0247528	.
chr1	243100001	243300000	A	0.00419263	.
chr1	243300001	244300000	B	-0.00426756	.
chr1	244300001	244500000	A	0.00750846	.
chr1	244500001	244600000	B	-0.0108255	.
chr1	244600001	245100000	A	0.0108125	.
chr1	245100001	246300000	B	-0.00816179	.
chr1	246300001	246900000	A	0.0057409	.
chr1	246900001	248800000	B	-0.019527	.
chr1	248800001	248956422	A	0.00205008	.
chr2	1	600000	B	-0.0103181	.
chr2	600001	700000	A	0.00235809	.
chr2	700001	3100000	B	-0.0146234	.
chr2	3100001	3700000	A	0.0134028	.
chr2	3700001	6800000	B	-0.0211836	.
chr2	6800001	7100000	A	0.00839483	.
chr2	7100001	7400000	B	-0.00223806	.
chr2	7400001	7500000	A	0.00298582	.
chr2	7500001	7600000	B	-0.0013463	.
chr2	7600001	12300000	A	0.0215539	.
chr2	12300001	12400000	B	-0.00132216	.
chr2	12400001	12600000	A	0.00269309	.
chr2	12600001	15200000	B	-0.0202205	.
chr2	15200001	15700000	A	0.0100136	.
chr2	15700001	17600000	B	-0.015112	.
chr2	17600001	17900000	A	0.00853341	.
chr2	17900001	19800000	B	-0.0182471	.
chr2	19800001	20900000	A	0.0173403	.
chr2	20900001	23300000	B	-0.0210855	.
chr2	23300001	31400000	A	0.021842	.
chr2	31400001	31600000	B	-0.00177522	.
chr2	31600001	33000000	A	0.0200483	.
chr2	33000001	33200000	B	-0.00166725	.
chr2	33200001	33600000	A	0.0104102	.
chr2	33600001	36500000	B	-0.021766	.
chr2	36500001	36600000	A	0.00296485	.
chr2	36600001	36800000	B	-0.00554812	.
chr2	36800001	39600000	A	0.0228402	.
chr2	39600001	39700000	B	-0.00569369	.
chr2	39700001	39800000	A	0.0020282	.
chr2	39800001	41900000	B	-0.0223688	.
chr2	41900001	48600000	A	0.0236804	.
chr2	48600001	53700000	B	-0.021755	.
chr2	53700001	55700000	A	0.0176132	.
chr2	55700001	57800000	B	-0.0210615	.
chr2	57800001	58200000	A	0.00924237	.
chr2	58200001	60300000	B	-0.0182994	.
chr2	60300001	63100000	A	0.0209903	.
chr2	63100001	63400000	B	-0.0118189	.
chr2	63400001	65700000	A	0.0212262	.
chr2	65700001	68000000	B	-0.0178093	.
chr2	68000001	71600000	A	0.020322	.
chr2	71600001	72800000	B	-0.0109123	.
chr2	72800001	75500000	A	0.0207211	.
chr2	75500001	75600000	B	-0.00102592	.
chr2	75600001	75700000	A	0.00786081	.
chr2	75700001	84400000	B	-0.0214045	.
chr2	84400001	84500000	A	0.00223563	.
chr2	84500001	84700000	B	-0.00708888	.
chr2	84700001	87800000	A	0.0160676	.
chr2	87800001	88000000	B	-0.0013343	.
chr2	88000001	88200000	A	0.00580006	.
chr2	88200001	88300000	B	-0.000320921	.
chr2	88300001	89000000	A	0.011275	.
chr2	89000001	89400000	B	-0.001467	.
chr2	89400001	89500000	A	0	.
chr2	89500001	90400000	B	-0.0132159	.
chr2	90400001	91400000	A	0.000383296	.
chr2	91400001	92700000	B	-0.0101371	.
chr2	92700001	92800000	A	5.51687e-05	.
chr2	92800001	94000000	B	-0.00154445	.
chr2	94000001	94100000	A	0.000371553	.
chr2	94100001	94300000	B	-0.0186666	.
chr2	94300001	94400000	A	0	.
chr2	94400001	95000000	B	-0.0141274	.
chr2	95000001	102500000	A	0.0176587	.
chr2	102500001	105000000	B	-0.0222674	.
chr2	105000001	106000000	A	0.00910943	.
chr2	106000001	106100000	B	-0.0018282	.
chr2	106100001	106200000	A	0.0147388	.
chr2	106200001	108300000	B	-0.0215146	.
chr2	108300001	114000000	A	0.0189737	.
chr2	114000001	117900000	B	-0.0235009	.
chr2	117900001	118300000	A	0.00935654	.
chr2	118300001	119100000	B	-0.00911188	.
chr2	119100001	121800000	A	0.0174633	.
chr2	121800001	127000000	B	-0.0220209	.
chr2	127000001	128800000	A	0.0207342	.
chr2	128800001	129800000	B	-0.00948501	.
chr2	129800001	130000000	A	0.00296143	.
chr2	130000001	130100000	B	-0.000563968	.
chr2	130100001	131200000	A	0.0123604	.
chr2	131200001	131400000	B	-0.00620954	.
chr2	131400001	131700000	A	0.0136694	.
chr2	131700001	133900000	B	-0.0178661	.
chr2	133900001	136400000	A	0.0216735	.
chr2	136400001	138400000	B	-0.0203611	.
chr2	138400001	138600000	A	0.0125047	.
chr2	138600001	142800000	B	-0.0251552	.
chr2	142800001	143800000	A	0.00695743	.
chr2	143800001	143900000	B	-0.00552868	.
chr2	143900001	144600000	A	0.0120481	.
chr2	144600001	147600000	B	-0.022885	.
chr2	147600001	147700000	A	0.00749332	.
chr2	147700001	147900000	B	-0.0150853	.
chr2	147900001	149100000	A	0.0121587	.
chr2	149100001	151200000	B	-0.0215618	.
chr2	151200001	152800000	A	0.0185374	.
chr2	152800001	156300000	B	-0.0246735	.
chr2	156300001	156600000	A	0.0145887	.
chr2	156600001	157300000	B	-0.0198119	.
chr2	157300001	157500000	A	0.0167347	.
chr2	157500001	158500000	B	-0.0186431	.
chr2	158500001	158600000	A	0.00196374	.
chr2	158600001	158900000	B	-0.00799495	.
chr2	158900001	160100000	A	0.0207614	.
chr2	160100001	160200000	B	-0.00511476	.
chr2	160200001	160300000	A	0.000594161	.
chr2	160300001	161000000	B	-0.0176966	.
chr2	161000001	161400000	A	0.0166316	.
chr2	161400001	168300000	B	-0.0222375	.
chr2	168300001	169200000	A	0.0101686	.
chr2	169200001	169300000	B	-0.0023722	.
chr2	169300001	175300000	A	0.022806	.
chr2	175300001	175900000	B	-0.00798712	.
chr2	175900001	177800000	A	0.0186238	.
chr2	177800001	178100000	B	-0.00887394	.
chr2	178100001	179300000	A	0.0160107	.
chr2	179300001	181000000	B	-0.020489	.
chr2	181000001	182000000	A	0.0132345	.
chr2	182000001	182700000	B	-0.0187159	.
chr2	182700001	182800000	A	0.00844345	.
chr2	182800001	182900000	B	-0.0044214	.
chr2	182900001	183200000	A	0.00859109	.
chr2	183200001	186400000	B	-0.0230291	.
chr2	186400001	186700000	A	0.00515292	.
chr2	186700001	189600000	B	-0.0215284	.
chr2	189600001	191300000	A	0.0204121	.
chr2	191300001	191500000	B	-0.00805953	.
chr2	191500001	191700000	A	0.0098425	.
chr2	191700001	195400000	B	-0.0208816	.
chr2	195400001	195700000	A	0.00728372	.
chr2	195700001	196100000	B	-0.0152997	.
chr2	196100001	196500000	A	0.0152218	.
chr2	196500001	196600000	B	-0.00180856	.
chr2	196600001	198100000	A	0.0182559	.
chr2	198100001	199800000	B	-0.0190404	.
chr2	199800001	200100000	A	0.00837381	.
chr2	200100001	200200000	B	-0.000980237	.
chr2	200200001	204100000	A	0.024563	.
chr2	204100001	205700000	B	-0.0163645	.
chr2	205700001	206600000	A	0.012053	.
chr2	206600001	206700000	B	-0.000808195	.
chr2	206700001	206900000	A	0.00869346	.
chr2	206900001	207000000	B	-0.00348188	.
chr2	207000001	208400000	A	0.0181863	.
chr2	208400001	210000000	B	-0.0219278	.
chr2	210000001	210200000	A	0.00434766	.
chr2	210200001	212700000	B	-0.0213656	.
chr2	212700001	213300000	A	0.00852553	.
chr2	213300001	214700000	B	-0.020166	.
chr2	214700001	214800000	A	0.00890476	.
chr2	214800001	215300000	B	-0.00962614	.
chr2	215300001	215400000	A	0.00849296	.
chr2	215400001	215700000	B	-0.00347223	.
chr2	215700001	219800000	A	0.019763	.
chr2	219800001	222300000	B	-0.0178774	.
chr2	222300001	223000000	A	0.014223	.
chr2	223000001	223700000	B	-0.0158881	.
chr2	223700001	224100000	A	0.0137681	.
chr2	224100001	224300000	B	-0.00673271	.
chr2	224300001	225100000	A	0.014264	.
chr2	225100001	226800000	B	-0.0195199	.
chr2	226800001	227000000	A	0.010932	.
chr2	227000001	227100000	B	-0.00611018	.
chr2	227100001	227700000	A	0.008727	.
chr2	227700001	229700000	B	-0.0191076	.
chr2	229700001	234600000	A	0.0227973	.
chr2	234600001	235000000	B	-0.00168488	.
chr2	235000001	235100000	A	0.000760346	.
chr2	235100001	235500000	B	-0.00212978	.
chr2	235500001	235800000	A	0.00138975	.
chr2	235800001	235900000	B	-0.000687761	.
chr2	235900001	236000000	A	0.000443099	.
chr2	236000001	236300000	B	-0.000843478	.
chr2	236300001	242193529	A	0.0171217	.
chr3	1	200000	B	-0.00814665	.
chr3	200001	300000	A	0.00201357	.
chr3	300001	3100000	B	-0.0253404	.
chr3	3100001	3200000	A	0.00226717	.
chr3	3200001	4300000	B	-0.0251252	.
chr3	4300001	5300000	A	0.0153055	.
chr3	5300001	8600000	B	-0.0248049	.
chr3	8600001	17800000	A	0.0221419	.
chr3	17800001	19900000	B	-0.0238879	.
chr3	19900001	20200000	A	0.00591679	.
chr3	20200001	23100000	B	-0.0267042	.
chr3	23100001	24000000	A	0.0150134	.
chr3	24000001	25600000	B	-0.0250064	.
chr3	25600001	25800000	A	0.00496114	.
chr3	25800001	27400000	B	-0.0243397	.
chr3	27400001	27500000	A	0.00918304	.
chr3	27500001	31200000	B	-0.0210794	.
chr3	31200001	33900000	A	0.0161041	.
chr3	33900001	36800000	B	-0.0249826	.
chr3	36800001	39600000	A	0.0202326	.
chr3	39600001	39700000	B	-0.000281473	.
chr3	39700001	39800000	A	0.00456578	.
chr3	39800001	40100000	B	-0.00151239	.
chr3	40100001	54400000	A	0.0220862	.
chr3	54400001	55400000	B	-0.00666664	.
chr3	55400001	55800000	A	0.0105952	.
chr3	55800001	56200000	B	-0.00494769	.
chr3	56200001	59100000	A	0.0217391	.
chr3	59100001	59200000	B	-0.00330142	.
chr3	59200001	59600000	A	0.0150469	.
chr3	59600001	61100000	B	-0.0152256	.
chr3	61100001	61300000	A	0.0109289	.
chr3	61300001	63800000	B	-0.0148114	.
chr3	63800001	64100000	A	0.0121442	.
chr3	64100001	66200000	B	-0.0208909	.
chr3	66200001	66600000	A	0.0109977	.
chr3	66600001	67000000	B	-0.00925168	.
chr3	67000001	67100000	A	0.0103784	.
chr3	67100001	67400000	B	-0.0167473	.
chr3	67400001	67700000	A	0.00627638	.
chr3	67700001	69000000	B	-0.0225511	.
chr3	69000001	69400000	A	0.0129356	.
chr3	69400001	71000000	B	-0.0220801	.
chr3	71000001	71100000	A	0.00441792	.
chr3	71100001	71200000	B	-0.000333	.
chr3	71200001	71600000	A	0.00547517	.
chr3	71600001	71700000	B	-0.00458485	.
chr3	71700001	73100000	A	0.0205344	.
chr3	73100001	81600000	B	-0.0247805	.
chr3	81600001	81900000	A	0.00604912	.
chr3	81900001	88000000	B	-0.0259778	.
chr3	88000001	88200000	A	0.00747243	.
chr3	88200001	91800000	B	-0.0216996	.
chr3	91800001	91900000	A	9.57733e-05	.
chr3	91900001	92700000	B	-0.00132315	.
chr3	92700001	92800000	A	0.000205384	.
chr3	92800001	93300000	B	-0.001532	.
chr3	93300001	93400000	A	0.000524301	.
chr3	93400001	94000000	B	-0.0156969	.
chr3	94000001	94100000	A	0.00412543	.
chr3	94100001	97900000	B	-0.0233603	.
chr3	97900001	98000000	A	0.00319586	.
chr3	98000001	98500000	B	-0.0114962	.
chr3	98500001	98800000	A	0.0109883	.
chr3	98800001	99800000	B	-0.0166439	.
chr3	99800001	100800000	A	0.0179874	.
chr3	100800001	101300000	B	-0.0159486	.
chr3	101300001	102200000	A	0.0140598	.
chr3	102200001	105700000	B	-0.0207037	.
chr3	105700001	106600000	A	0.0125372	.
chr3	106600001	107500000	B	-0.0206914	.
chr3	107500001	108600000	A	0.0126582	.
chr3	108600001	111600000	B	-0.0255763	.
chr3	111600001	111700000	A	0.00353479	.
chr3	111700001	111900000	B	-0.00409003	.
chr3	111900001	114600000	A	0.0215901	.
chr3	114600001	114700000	B	-0.00273445	.
chr3	114700001	114900000	A	0.0040351	.
chr3	114900001	115100000	B	-0.00298351	.
chr3	115100001	115200000	A	0.00932197	.
chr3	115200001	119200000	B	-0.0234089	.
chr3	119200001	120400000	A	0.0205627	.
chr3	120400001	120600000	B	-0.00218838	.
chr3	120600001	120800000	A	0.0135507	.
chr3	120800001	121400000	B	-0.0247398	.
chr3	121400001	135300000	A	0.0214843	.
chr3	135300001	135900000	B	-0.00415631	.
chr3	135900001	137100000	A	0.0229309	.
chr3	137100001	137900000	B	-0.014261	.
chr3	137900001	139000000	A	0.0199026	.
chr3	139000001	139100000	B	-0.00533167	.
chr3	139100001	139700000	A	0.00802677	.
chr3	139700001	139900000	B	-0.00262971	.
chr3	139900001	143900000	A	0.0183227	.
chr3	143900001	149000000	B	-0.0257448	.
chr3	149000001	151400000	A	0.0165818	.
chr3	151400001	152000000	B	-0.0176259	.
chr3	152000001	152600000	A	0.0154303	.
chr3	152600001	155800000	B	-0.0230821	.
chr3	155800001	156000000	A	0.0138607	.
chr3	156000001	156400000	B	-0.00590626	.
chr3	156400001	157200000	A	0.0191693	.
chr3	157200001	158100000	B	-0.0255606	.
chr3	158100001	158200000	A	0.0031965	.
chr3	158200001	158300000	B	-0.000564275	.
chr3	158300001	158400000	A	0.00172134	.
chr3	158400001	158700000	B	-0.0106105	.
chr3	158700001	158800000	A	0.00225947	.
chr3	158800001	159800000	B	-0.0249223	.
chr3	159800001	160600000	A	0.0156889	.
chr3	160600001	169700000	B	-0.0248413	.
chr3	169700001	172800000	A	0.0219093	.
chr3	172800001	177000000	B	-0.0282703	.
chr3	177000001	177500000	A	0.0125942	.
chr3	177500001	178500000	B	-0.0195178	.
chr3	178500001	178600000	A	0.00378356	.
chr3	178600001	179000000	B	-0.00922821	.
chr3	179000001	180000000	A	0.0143018	.
chr3	180000001	182700000	B	-0.0199199	.
chr3	182700001	187400000	A	0.0259451	.
chr3	187400001	187600000	B	-0.00394496	.
chr3	187600001	188000000	A	0.0079176	.
chr3	188000001	188100000	B	-0.00169073	.
chr3	188100001	188200000	A	0.000589495	.
chr3	188200001	189300000	B	-0.00975795	.
chr3	189300001	189900000	A	0.0099419	.
chr3	189900001	191200000	B	-0.0189525	.
chr3	191200001	191400000	A	0.0135251	.
chr3	191400001	192800000	B	-0.0213962	.
chr3	192800001	192900000	A	0.0100232	.
chr3	192900001	193500000	B	-0.0150161	.
chr3	193500001	198295559	A	0.0252255	.
chr4	1	9200000	A	0.0223253	.
chr4	9200001	9300000	B	-0.0138044	.
chr4	9300001	11800000	A	0.0161954	.
chr4	11800001	12600000	B	-0.00562075	.
chr4	12600001	12900000	A	0.00244997	.
chr4	12900001	13100000	B	-0.00129164	.
chr4	13100001	14400000	A	0.00993126	.
chr4	14400001	14600000	B	-0.0015008	.
chr4	14600001	18400000	A	0.0157831	.
chr4	18400001	18500000	B	-0.00306481	.
chr4	18500001	18700000	A	0.000793329	.
chr4	18700001	20300000	B	-0.00616259	.
chr4	20300001	20800000	A	0.00619552	.
chr4	20800001	21700000	B	-0.00392791	.
chr4	21700001	21800000	A	0.00260455	.
chr4	21800001	22300000	B	-0.00376727	.
chr4	22300001	22800000	A	0.00373096	.
chr4	22800001	23900000	B	-0.0048685	.
chr4	23900001	27400000	A	0.020716	.
chr4	27400001	27600000	B	-0.00229463	.
chr4	27600001	27800000	A	0.00118566	.
chr4	27800001	30700000	B	-0.00485578	.
chr4	30700001	30900000	A	0.000958826	.
chr4	30900001	31200000	B	-0.00103389	.
chr4	31200001	31300000	A	0.00115402	.
chr4	31300001	35700000	B	-0.00490668	.
chr4	35700001	42900000	A	0.024124	.
chr4	42900001	44400000	B	-0.00667617	.
chr4	44400001	44800000	A	0.00824301	.
chr4	44800001	46800000	B	-0.00452675	.
chr4	46800001	49400000	A	0.0199459	.
chr4	49400001	49600000	B	-0.00132931	.
chr4	49600001	49700000	A	0.000220634	.
chr4	49700001	51800000	B	-0.00235272	.
chr4	51800001	52100000	A	0.00946438	.
chr4	52100001	52500000	B	-0.00706709	.
chr4	52500001	54400000	A	0.0231035	.
chr4	54400001	54500000	B	-0.00221171	.
chr4	54500001	54800000	A	0.0032764	.
chr4	54800001	55300000	B	-0.00605252	.
chr4	55300001	57200000	A	0.0217701	.
chr4	57200001	67400000	B	-0.0257306	.
chr4	67400001	67800000	A	0.0196339	.
chr4	67800001	68300000	B	-0.018195	.
chr4	68300001	68400000	A	0.0141293	.
chr4	68400001	68500000	B	-0.00572572	.
chr4	68500001	68800000	A	0.0134534	.
chr4	68800001	69000000	B	-0.00327125	.
chr4	69000001	69100000	A	0.00419334	.
chr4	69100001	70600000	B	-0.0210589	.
chr4	70600001	71100000	A	0.0235353	.
chr4	71100001	73000000	B	-0.0255926	.
chr4	73000001	73300000	A	0.0216088	.
chr4	73300001	73500000	B	-0.00924357	.
chr4	73500001	73800000	A	0.0144468	.
chr4	73800001	74100000	B	-0.0210274	.
chr4	74100001	74500000	A	0.0114263	.
chr4	74500001	74800000	B	-0.0128475	.
chr4	74800001	75300000	A	0.0143617	.
chr4	75300001	75400000	B	-0.00675504	.
chr4	75400001	78000000	A	0.0225927	.
chr4	78000001	78500000	B	-0.0104474	.
chr4	78500001	79000000	A	0.0200578	.
chr4	79000001	80000000	B	-0.0273087	.
chr4	80000001	80200000	A	0.0135277	.
chr4	80200001	81400000	B	-0.015687	.
chr4	81400001	81800000	A	0.00799052	.
chr4	81800001	82200000	B	-0.0113451	.
chr4	82200001	83700000	A	0.0231525	.
chr4	83700001	85400000	B	-0.02557	.
chr4	85400001	85800000	A	0.0145862	.
chr4	85800001	86500000	B	-0.0219456	.
chr4	86500001	86600000	A	0.0118973	.
chr4	86600001	86900000	B	-0.00426406	.
chr4	86900001	87500000	A	0.022547	.
chr4	87500001	87900000	B	-0.015663	.
chr4	87900001	89200000	A	0.0177143	.
chr4	89200001	94200000	B	-0.0267907	.
chr4	94200001	94600000	A	0.0143671	.
chr4	94600001	98200000	B	-0.0288744	.
chr4	98200001	98700000	A	0.0120488	.
chr4	98700001	98800000	B	-0.01375	.
chr4	98800001	99100000	A	0.0178235	.
chr4	99100001	99500000	B	-0.014905	.
chr4	99500001	99600000	A	0.0014443	.
chr4	99600001	99800000	B	-0.0149442	.
chr4	99800001	100000000	A	0.0211036	.
chr4	100000001	100900000	B	-0.0260476	.
chr4	100900001	101400000	A	0.0141005	.
chr4	101400001	102300000	B	-0.0166176	.
chr4	102300001	103200000	A	0.0222983	.
chr4	103200001	104400000	B	-0.0307904	.
chr4	104400001	104600000	A	0.00359517	.
chr4	104600001	104700000	B	-0.00384369	.
chr4	104700001	105900000	A	0.0180792	.
chr4	105900001	106200000	B	-0.0136296	.
chr4	106200001	106300000	A	0.00875053	.
chr4	106300001	107600000	B	-0.030931	.
chr4	107600001	107700000	A	0.000573187	.
chr4	107700001	107900000	B	-0.0102528	.
chr4	107900001	108200000	A	0.0189248	.
chr4	108200001	108500000	B	-0.00360025	.
chr4	108500001	108700000	A	0.0114896	.
chr4	108700001	109400000	B	-0.0206359	.
chr4	109400001	110300000	A	0.0198003	.
chr4	110300001	111900000	B	-0.0271479	.
chr4	111900001	113000000	A	0.0167723	.
chr4	113000001	113100000	B	-0.000454583	.
chr4	113100001	114000000	A	0.0141355	.
chr4	114000001	118500000	B	-0.0289032	.
chr4	118500001	119000000	A	0.0123715	.
chr4	119000001	119200000	B	-0.00816183	.
chr4	119200001	119500000	A	0.00930582	.
chr4	119500001	121100000	B	-0.02598	.
chr4	121100001	121300000	A	0.0110986	.
chr4	121300001	121600000	B	-0.0179566	.
chr4	121600001	122000000	A	0.0112926	.
chr4	122000001	122100000	B	-0.00803944	.
chr4	122100001	122400000	A	0.0122953	.
chr4	122400001	122600000	B	-0.0108599	.
chr4	122600001	123700000	A	0.0130085	.
chr4	123700001	127700000	B	-0.0311173	.
chr4	127700001	129100000	A	0.0142377	.
chr4	129100001	138200000	B	-0.031068	.
chr4	138200001	138300000	A	0.00972414	.
chr4	138300001	138900000	B	-0.0172037	.
chr4	138900001	140400000	A	0.0140415	.
chr4	140400001	140500000	B	-0.00151919	.
chr4	140500001	140900000	A	0.0117923	.
chr4	140900001	141600000	B	-0.0198399	.
chr4	141600001	141700000	A	0.0101034	.
chr4	141700001	143200000	B	-0.0262395	.
chr4	143200001	143600000	A	0.0111278	.
chr4	143600001	145000000	B	-0.0248251	.
chr4	145000001	146500000	A	0.0174104	.
chr4	146500001	147600000	B	-0.0200662	.
chr4	147600001	148100000	A	0.0156014	.
chr4	148100001	150300000	B	-0.027879	.
chr4	150300001	153800000	A	0.01844	.
chr4	153800001	154400000	B	-0.0172823	.
chr4	154400001	154600000	A	0.00367693	.
chr4	154600001	155600000	B	-0.0235531	.
chr4	155600001	155700000	A	0.00423481	.
chr4	155700001	158600000	B	-0.0283011	.
chr4	158600001	159400000	A	0.0153088	.
chr4	159400001	163500000	B	-0.0281436	.
chr4	163500001	163700000	A	0.00802566	.
chr4	163700001	164800000	B	-0.02498	.
chr4	164800001	165000000	A	0.0093031	.
chr4	165000001	165100000	B	-0.00191582	.
chr4	165100001	165400000	A	0.00947178	.
chr4	165400001	168300000	B	-0.0281122	.
chr4	168300001	168400000	A	0.000171111	.
chr4	168400001	168800000	B	-0.00841192	.
chr4	168800001	169800000	A	0.0146137	.
chr4	169800001	173100000	B	-0.0250307	.
chr4	173100001	173500000	A	0.01112	.
chr4	173500001	174200000	B	-0.0262943	.
chr4	174200001	174300000	A	0.00728442	.
chr4	174300001	182800000	B	-0.0261154	.
chr4	182800001	182900000	A	0.000537196	.
chr4	182900001	183300000	B	-0.00832254	.
chr4	183300001	183900000	A	0.00860426	.
chr4	183900001	184100000	B	-0.00307771	.
chr4	184100001	185800000	A	0.0174757	.
chr4	185800001	186000000	B	-0.00314914	.
chr4	186000001	186200000	A	0.004572	.
chr4	186200001	190100000	B	-0.0277143	.
chr4	190100001	190214555	A	0.000540812	.
chr5	1	2000000	A	0.022586	.
chr5	2000001	5400000	B	-0.0188028	.
chr5	5400001	5900000	A	0.00898258	.
chr5	5900001	6100000	B	-0.00512753	.
chr5	6100001	6800000	A	0.0157604	.
chr5	6800001	7800000	B	-0.0169608	.
chr5	7800001	7900000	A	0.0077903	.
chr5	7900001	10200000	B	-0.018867	.
chr5	10200001	10900000	A	0.022918	.
chr5	10900001	14000000	B	-0.0230355	.
chr5	14000001	15000000	A	0.0206797	.
chr5	15000001	16400000	B	-0.0233528	.
chr5	16400001	16600000	A	0.00216218	.
chr5	16600001	17200000	B	-0.00722091	.
chr5	17200001	17500000	A	0.0126	.
chr5	17500001	18700000	B	-0.0226354	.
chr5	18700001	18800000	A	0.00789511	.
chr5	18800001	31400000	B	-0.0264439	.
chr5	31400001	32700000	A	0.0183031	.
chr5	32700001	33400000	B	-0.0205136	.
chr5	33400001	34300000	A	0.0143091	.
chr5	34300001	34400000	B	-0.00379434	.
chr5	34400001	34600000	A	0.0037283	.
chr5	34600001	34800000	B	-0.00318118	.
chr5	34800001	35400000	A	0.0103335	.
chr5	35400001	35800000	B	-0.0100418	.
chr5	35800001	35900000	A	0.00123039	.
chr5	35900001	36100000	B	-0.00539039	.
chr5	36100001	36400000	A	0.0113818	.
chr5	36400001	36600000	B	-0.000288698	.
chr5	36600001	37900000	A	0.0236238	.
chr5	37900001	38900000	B	-0.00927746	.
chr5	38900001	39300000	A	0.00958496	.
chr5	39300001	40400000	B	-0.018465	.
chr5	40400001	40600000	A	0.0112322	.
chr5	40600001	40700000	B	-7.54653e-05	.
chr5	40700001	40900000	A	0.0183393	.
chr5	40900001	41700000	B	-0.0226959	.
chr5	41700001	42000000	A	0.0163163	.
chr5	42000001	42900000	B	-0.019098	.
chr5	42900001	43700000	A	0.0248266	.
chr5	43700001	46500000	B	-0.0226676	.
chr5	46500001	47000000	A	0.00538589	.
chr5	47000001	47200000	B	-0.0143246	.
chr5	47200001	49500000	A	0.000537397	.
chr5	49500001	49700000	B	-0.00171647	.
chr5	49700001	50100000	A	0	.
chr5	50100001	50400000	B	-0.0264291	.
chr5	50400001	50800000	A	0.0121111	.
chr5	50800001	52700000	B	-0.0293556	.
chr5	52700001	52900000	A	0.00268149	.
chr5	52900001	53000000	B	-0.0016402	.
chr5	53000001	53100000	A	0.000744822	.
chr5	53100001	53500000	B	-0.0200334	.
chr5	53500001	53700000	A	0.00563987	.
chr5	53700001	54200000	B	-0.0151769	.
chr5	54200001	55000000	A	0.00546664	.
chr5	55000001	55100000	B	-0.00119124	.
chr5	55100001	57400000	A	0.0310254	.
chr5	57400001	59100000	B	-0.0156386	.
chr5	59100001	59200000	A	0.00337173	.
chr5	59200001	59500000	B	-0.0149226	.
chr5	59500001	59700000	A	0.0110275	.
chr5	59700001	60300000	B	-0.0164423	.
chr5	60300001	61700000	A	0.015946	.
chr5	61700001	62200000	B	-0.0103431	.
chr5	62200001	62600000	A	0.0246969	.
chr5	62600001	64700000	B	-0.0300154	.
chr5	64700001	65300000	A	0.0133204	.
chr5	65300001	65400000	B	-0.00551297	.
chr5	65400001	66400000	A	0.0241158	.
chr5	66400001	66500000	B	-0.0109193	.
chr5	66500001	66900000	A	0.00527632	.
chr5	66900001	67000000	B	-0.000428128	.
chr5	67000001	67300000	A	0.0148112	.
chr5	67300001	68000000	B	-0.011234	.
chr5	68000001	69900000	A	0.0213162	.
chr5	69900001	70000000	B	-0.00123624	.
chr5	70000001	70200000	A	0.00369405	.
chr5	70200001	70300000	B	-0.000874862	.
chr5	70300001	71200000	A	0.0040366	.
chr5	71200001	71300000	B	-0.00131364	.
chr5	71300001	82300000	A	0.0274918	.
chr5	82300001	82800000	B	-0.0183693	.
chr5	82800001	82900000	A	0.00477855	.
chr5	82900001	83000000	B	-0.00236137	.
chr5	83000001	83500000	A	0.0136035	.
chr5	83500001	87000000	B	-0.0287762	.
chr5	87000001	87400000	A	0.0196948	.
chr5	87400001	88200000	B	-0.0250412	.
chr5	88200001	88300000	A	0.0125372	.
chr5	88300001	88700000	B	-0.0224412	.
chr5	88700001	90600000	A	0.0193353	.
chr5	90600001	91100000	B	-0.0144081	.
chr5	91100001	91400000	A	0.0163698	.
chr5	91400001	93900000	B	-0.0267054	.
chr5	93900001	94100000	A	0.00318063	.
chr5	94100001	94500000	B	-0.0161439	.
chr5	94500001	95300000	A	0.018611	.
chr5	95300001	95400000	B	-0.00233935	.
chr5	95400001	97200000	A	0.0296137	.
chr5	97200001	98800000	B	-0.0263649	.
chr5	98800001	99100000	A	0.0189482	.
chr5	99100001	100500000	B	-0.0265739	.
chr5	100500001	101000000	A	0.0158857	.
chr5	101000001	102700000	B	-0.0259315	.
chr5	102700001	103400000	A	0.0141873	.
chr5	103400001	107300000	B	-0.0281712	.
chr5	107300001	107600000	A	0.0125355	.
chr5	107600001	108200000	B	-0.0117813	.
chr5	108200001	108400000	A	0.00100667	.
chr5	108400001	108500000	B	-0.00712875	.
chr5	108500001	109500000	A	0.0203388	.
chr5	109500001	109700000	B	-0.0162483	.
chr5	109700001	109800000	A	0.0163104	.
chr5	109800001	111100000	B	-0.0224549	.
chr5	111100001	113400000	A	0.0166631	.
chr5	113400001	113500000	B	-0.000842504	.
chr5	113500001	113600000	A	0.0213868	.
chr5	113600001	115200000	B	-0.0263403	.
chr5	115200001	115700000	A	0.0204589	.
chr5	115700001	115800000	B	-0.010584	.
chr5	115800001	116900000	A	0.0136374	.
chr5	116900001	118900000	B	-0.0250416	.
chr5	118900001	119500000	A	0.0235179	.
chr5	119500001	122700000	B	-0.0210113	.
chr5	122700001	123000000	A	0.0190224	.
chr5	123000001	123300000	B	-0.0128181	.
chr5	123300001	123600000	A	0.0174813	.
chr5	123600001	124400000	B	-0.0160214	.
chr5	124400001	125200000	A	0.0149101	.
chr5	125200001	126300000	B	-0.0214774	.
chr5	126300001	127100000	A	0.0222364	.
chr5	127100001	127400000	B	-0.00382285	.
chr5	127400001	128200000	A	0.0133276	.
chr5	128200001	131100000	B	-0.0250932	.
chr5	131100001	136300000	A	0.027202	.
chr5	136300001	137100000	B	-0.00677333	.
chr5	137100001	140700000	A	0.0287923	.
chr5	140700001	141400000	B	-0.0210729	.
chr5	141400001	144000000	A	0.0257368	.
chr5	144000001	144100000	B	-0.00972952	.
chr5	144100001	144200000	A	0.00879965	.
chr5	144200001	146000000	B	-0.0245288	.
chr5	146000001	146500000	A	0.0168256	.
chr5	146500001	148400000	B	-0.0188924	.
chr5	148400001	148500000	A	0.000923783	.
chr5	148500001	148700000	B	-0.0165962	.
chr5	148700001	151900000	A	0.0267134	.
chr5	151900001	154000000	B	-0.0184521	.
chr5	154000001	155100000	A	0.0255154	.
chr5	155100001	156800000	B	-0.0158428	.
chr5	156800001	160600000	A	0.0268353	.
chr5	160600001	163400000	B	-0.0178931	.
chr5	163400001	163600000	A	0.00839653	.
chr5	163600001	168100000	B	-0.0225897	.
chr5	168100001	170900000	A	0.0145641	.
chr5	170900001	171200000	B	-0.00799459	.
chr5	171200001	175000000	A	0.0231161	.
chr5	175000001	175200000	B	-0.00263061	.
chr5	175200001	178700000	A	0.0218161	.
chr5	178700001	179400000	B	-0.0124473	.
chr5	179400001	181538259	A	0.0178746	.
chr6	1	8100000	A	0.0200755	.
chr6	8100001	10400000	B	-0.0260436	.
chr6	10400001	17000000	A	0.0216652	.
chr6	17000001	17600000	B	-0.0125481	.
chr6	17600001	17800000	A	0.0145507	.
chr6	17800001	18100000	B	-0.00465333	.
chr6	18100001	18300000	A	0.0110693	.
chr6	18300001	20100000	B	-0.0259976	.
chr6	20100001	21500000	A	0.0104644	.
chr6	21500001	24400000	B	-0.0228213	.
chr6	24400001	29100000	A	0.0225452	.
chr6	29100001	29300000	B	-0.000655656	.
chr6	29300001	46500000	A	0.0239515	.
chr6	46500001	47100000	B	-0.00716783	.
chr6	47100001	47700000	A	0.00873091	.
chr6	47700001	52100000	B	-0.0227533	.
chr6	52100001	53900000	A	0.0160238	.
chr6	53900001	56400000	B	-0.0230405	.
chr6	56400001	57600000	A	0.0180885	.
chr6	57600001	58500000	B	-0.0239322	.
chr6	58500001	58700000	A	0.000717989	.
chr6	58700001	59200000	B	-0.000357757	.
chr6	59200001	59800000	A	0.00228739	.
chr6	59800001	59900000	B	-0.000688347	.
chr6	59900001	60200000	A	0	.
chr6	60200001	63400000	B	-0.0285088	.
chr6	63400001	63800000	A	0.0136196	.
chr6	63800001	69700000	B	-0.0303205	.
chr6	69700001	70200000	A	0.0142884	.
chr6	70200001	70400000	B	-0.0077906	.
chr6	70400001	70900000	A	0.0125214	.
chr6	70900001	72600000	B	-0.0232855	.
chr6	72600001	73800000	A	0.0163257	.
chr6	73800001	75200000	B	-0.0247044	.
chr6	75200001	75900000	A	0.0149978	.
chr6	75900001	78900000	B	-0.0309715	.
chr6	78900001	79100000	A	0.0125695	.
chr6	79100001	79200000	B	-0.00941325	.
chr6	79200001	79300000	A	0.00309745	.
chr6	79300001	80000000	B	-0.0176139	.
chr6	80000001	80200000	A	0.000557913	.
chr6	80200001	82200000	B	-0.0273411	.
chr6	82200001	82300000	A	0.00403773	.
chr6	82300001	83000000	B	-0.026502	.
chr6	83000001	83200000	A	0.0136663	.
chr6	83200001	85400000	B	-0.0225811	.
chr6	85400001	85700000	A	0.0160822	.
chr6	85700001	87000000	B	-0.0300891	.
chr6	87000001	90600000	A	0.024516	.
chr6	90600001	96800000	B	-0.0284294	.
chr6	96800001	96900000	A	0.00924084	.
chr6	96900001	97200000	B	-0.00581805	.
chr6	97200001	97300000	A	0.0071547	.
chr6	97300001	98900000	B	-0.0269054	.
chr6	98900001	99000000	A	0.000701709	.
chr6	99000001	99300000	B	-0.0169477	.
chr6	99300001	99600000	A	0.0166571	.
chr6	99600001	100500000	B	-0.0213637	.
chr6	100500001	100900000	A	0.00596239	.
chr6	100900001	105100000	B	-0.0288763	.
chr6	105100001	112100000	A	0.024579	.
chr6	112100001	113500000	B	-0.0225508	.
chr6	113500001	113900000	A	0.0156442	.
chr6	113900001	116000000	B	-0.0280645	.
chr6	116000001	116700000	A	0.0218909	.
chr6	116700001	117500000	B	-0.0241164	.
chr6	117500001	117700000	A	0.00967732	.
chr6	117700001	118500000	B	-0.0243786	.
chr6	118500001	119000000	A	0.0159042	.
chr6	119000001	119100000	B	-0.0104331	.
chr6	119100001	119600000	A	0.0103387	.
chr6	119600001	122400000	B	-0.0274996	.
chr6	122400001	122500000	A	0.00211788	.
chr6	122500001	125700000	B	-0.0266492	.
chr6	125700001	126100000	A	0.0169143	.
chr6	126100001	127300000	B	-0.0241326	.
chr6	127300001	127400000	A	0.00877341	.
chr6	127400001	129500000	B	-0.0224806	.
chr6	129500001	131200000	A	0.0140229	.
chr6	131200001	131500000	B	-0.0128096	.
chr6	131500001	131700000	A	0.0047429	.
chr6	131700001	132300000	B	-0.0203351	.
chr6	132300001	132900000	A	0.0148392	.
chr6	132900001	133900000	B	-0.0255504	.
chr6	133900001	136000000	A	0.0197185	.
chr6	136000001	136100000	B	-0.0017055	.
chr6	136100001	139400000	A	0.0222474	.
chr6	139400001	142700000	B	-0.0258987	.
chr6	142700001	143200000	A	0.0173454	.
chr6	143200001	143400000	B	-0.00241607	.
chr6	143400001	143600000	A	0.017793	.
chr6	143600001	143800000	B	-0.00455934	.
chr6	143800001	144800000	A	0.0200799	.
chr6	144800001	145700000	B	-0.0239356	.
chr6	145700001	145900000	A	0.00555677	.
chr6	145900001	148500000	B	-0.0247638	.
chr6	148500001	151500000	A	0.0231614	.
chr6	151500001	152100000	B	-0.0219248	.
chr6	152100001	152300000	A	0.00313874	.
chr6	152300001	154100000	B	-0.0265118	.
chr6	154100001	155600000	A	0.018189	.
chr6	155600001	156400000	B	-0.0190903	.
chr6	156400001	160100000	A	0.025419	.
chr6	160100001	161000000	B	-0.0134919	.
chr6	161000001	161200000	A	0.00973334	.
chr6	161200001	163400000	B	-0.0270917	.
chr6	163400001	163800000	A	0.00671043	.
chr6	163800001	166200000	B	-0.0268528	.
chr6	166200001	168000000	A	0.0176753	.
chr6	168000001	169700000	B	-0.0222573	.
chr6	169700001	169800000	A	0.016605	.
chr6	169800001	170200000	B	-0.00896115	.
chr6	170200001	170805979	A	0.0073901	.
chr7	1	3200000	A	0.022663	.
chr7	3200001	4600000	B	-0.0159269	.
chr7	4600001	8300000	A	0.0273147	.
chr7	8300001	10900000	B	-0.0300621	.
chr7	10900001	11200000	A	0.0112655	.
chr7	11200001	17000000	B	-0.0275824	.
chr7	17000001	17500000	A	0.0181568	.
chr7	17500001	17800000	B	-0.0126408	.
chr7	17800001	18000000	A	0.0116687	.
chr7	18000001	18400000	B	-0.0189373	.
chr7	18400001	18600000	A	0.01069	.
chr7	18600001	20000000	B	-0.0262818	.
chr7	20000001	20400000	A	0.0189868	.
chr7	20400001	21300000	B	-0.0200712	.
chr7	21300001	21500000	A	0.0200645	.
chr7	21500001	21900000	B	-0.00996032	.
chr7	21900001	23800000	A	0.0285161	.
chr7	23800001	24100000	B	-0.00244243	.
chr7	24100001	28900000	A	0.0213715	.
chr7	28900001	29200000	B	-0.00385816	.
chr7	29200001	29300000	A	0.000198951	.
chr7	29300001	29700000	B	-0.00282045	.
chr7	29700001	31100000	A	0.0256146	.
chr7	31100001	32500000	B	-0.017639	.
chr7	32500001	33200000	A	0.0195283	.
chr7	33200001	35000000	B	-0.0258522	.
chr7	35000001	35100000	A	0.0021346	.
chr7	35100001	35500000	B	-0.0173401	.
chr7	35500001	38500000	A	0.0230235	.
chr7	38500001	38700000	B	-0.00812041	.
chr7	38700001	38900000	A	0.0165651	.
chr7	38900001	39300000	B	-0.0115013	.
chr7	39300001	40200000	A	0.0197976	.
chr7	40200001	41800000	B	-0.0233798	.
chr7	41800001	41900000	A	0.0101507	.
chr7	41900001	42900000	B	-0.0179475	.
chr7	42900001	45900000	A	0.0257558	.
chr7	45900001	47100000	B	-0.0202009	.
chr7	47100001	48200000	A	0.0162047	.
chr7	48200001	50100000	B	-0.0244794	.
chr7	50100001	50500000	A	0.0216663	.
chr7	50500001	50600000	B	-0.00430599	.
chr7	50600001	50700000	A	0.00298796	.
chr7	50700001	55000000	B	-0.0254379	.
chr7	55000001	55700000	A	0.00961445	.
chr7	55700001	55900000	B	-0.00622103	.
chr7	55900001	56100000	A	0.0143286	.
chr7	56100001	58500000	B	-0.0142906	.
chr7	58500001	58600000	A	0.000212772	.
chr7	58600001	59500000	B	-0.00112842	.
chr7	59500001	59600000	A	0.000452264	.
chr7	59600001	60000000	B	-0.00169993	.
chr7	60000001	60200000	A	0.00193061	.
chr7	60200001	60300000	B	-0.00213772	.
chr7	60300001	60600000	A	0.00222653	.
chr7	60600001	60700000	B	-0.000343491	.
chr7	60700001	60800000	A	0.000552095	.
chr7	60800001	61200000	B	-0.0141625	.
chr7	61200001	61300000	A	0.00147601	.
chr7	61300001	65000000	B	-0.0161834	.
chr7	65000001	65100000	A	0.0078579	.
chr7	65100001	65300000	B	-0.00528274	.
chr7	65300001	65400000	A	0.00325775	.
chr7	65400001	65700000	B	-0.00677212	.
chr7	65700001	67400000	A	0.0262553	.
chr7	67400001	69500000	B	-0.0193869	.
chr7	69500001	70100000	A	0.0115478	.
chr7	70100001	70600000	B	-0.00328344	.
chr7	70600001	70800000	A	0.00684366	.
chr7	70800001	72600000	B	-0.0174503	.
chr7	72600001	78100000	A	0.0260035	.
chr7	78100001	86900000	B	-0.0312835	.
chr7	86900001	87600000	A	0.0115813	.
chr7	87600001	87800000	B	-0.0174154	.
chr7	87800001	88200000	A	0.0201317	.
chr7	88200001	90200000	B	-0.0302953	.
chr7	90200001	90400000	A	0.0036997	.
chr7	90400001	90500000	B	-0.000468699	.
chr7	90500001	91100000	A	0.0156533	.
chr7	91100001	91800000	B	-0.0245932	.
chr7	91800001	93300000	A	0.0222423	.
chr7	93300001	94000000	B	-0.0213059	.
chr7	94000001	94100000	A	0.0101666	.
chr7	94100001	94500000	B	-0.0160557	.
chr7	94500001	94600000	A	0.0111235	.
chr7	94600001	96100000	B	-0.0220339	.
chr7	96100001	96400000	A	0.00869362	.
chr7	96400001	97100000	B	-0.0198627	.
chr7	97100001	97200000	A	0.00221331	.
chr7	97200001	97900000	B	-0.0265834	.
chr7	97900001	103500000	A	0.0275061	.
chr7	103500001	104100000	B	-0.0145994	.
chr7	104100001	104300000	A	0.00745746	.
chr7	104300001	104800000	B	-0.0124886	.
chr7	104800001	108600000	A	0.0280894	.
chr7	108600001	112200000	B	-0.0263401	.
chr7	112200001	112500000	A	0.00832772	.
chr7	112500001	112800000	B	-0.021198	.
chr7	112800001	112900000	A	0.00109793	.
chr7	112900001	114800000	B	-0.026427	.
chr7	114800001	115100000	A	0.00851923	.
chr7	115100001	116100000	B	-0.0271301	.
chr7	116100001	116300000	A	0.006467	.
chr7	116300001	116500000	B	-0.0106546	.
chr7	116500001	116700000	A	0.00953336	.
chr7	116700001	116800000	B	-0.000645446	.
chr7	116800001	117300000	A	0.0211656	.
chr7	117300001	120300000	B	-0.0255697	.
chr7	120300001	120500000	A	0.0163135	.
chr7	120500001	120800000	B	-0.00620122	.
chr7	120800001	121000000	A	0.0131991	.
chr7	121000001	121100000	B	-0.00807404	.
chr7	121100001	121200000	A	0.000404237	.
chr7	121200001	121300000	B	-0.00107	.
chr7	121300001	121500000	A	0.0155962	.
chr7	121500001	123700000	B	-0.0265796	.
chr7	123700001	123800000	A	0.00898425	.
chr7	123800001	126400000	B	-0.0289116	.
chr7	126400001	126800000	A	0.00556116	.
chr7	126800001	127300000	B	-0.0263848	.
chr7	127300001	135800000	A	0.0247963	.
chr7	135800001	135900000	B	-0.00521271	.
chr7	135900001	136000000	A	0.015507	.
chr7	136000001	137800000	B	-0.0292413	.
chr7	137800001	138200000	A	0.0144157	.
chr7	138200001	138400000	B	-0.0133297	.
chr7	138400001	138600000	A	0.0175995	.
chr7	138600001	138800000	B	-0.00302275	.
chr7	138800001	141300000	A	0.0299132	.
chr7	141300001	141400000	B	-0.00229249	.
chr7	141400001	141800000	A	0.0194332	.
chr7	141800001	142400000	B	-0.021141	.
chr7	142400001	142900000	A	0.0139254	.
chr7	142900001	143200000	B	-0.0170817	.
chr7	143200001	143400000	A	0.0193448	.
chr7	143400001	143600000	B	-0.00725895	.
chr7	143600001	143900000	A	0.004683	.
chr7	143900001	144200000	B	-0.019451	.
chr7	144200001	144400000	A	0.00258975	.
chr7	144400001	148500000	B	-0.0297466	.
chr7	148500001	152800000	A	0.0296929	.
chr7	152800001	154900000	B	-0.026026	.
chr7	154900001	155900000	A	0.0183651	.
chr7	155900001	156400000	B	-0.00625891	.
chr7	156400001	157400000	A	0.0233111	.
chr7	157400001	158600000	B	-0.0133303	.
chr7	158600001	159000000	A	0.0139503	.
chr7	159000001	159300000	B	-0.0158521	.
chr7	159300001	159345973	A	0	.
chr8	1	300000	A	0.00362314	.
chr8	300001	400000	B	-0.00490667	.
chr8	400001	500000	A	0.00327267	.
chr8	500001	600000	B	-0.0129975	.
chr8	600001	800000	A	0.00225467	.
chr8	800001	1700000	B	-0.0154997	.
chr8	1700001	1800000	A	0.0124917	.
chr8	1800001	6400000	B	-0.0207122	.
chr8	6400001	7100000	A	0.0172463	.
chr8	7100001	7300000	B	-0.00421385	.
chr8	7300001	7500000	A	0.00178738	.
chr8	7500001	7600000	B	-0.00179579	.
chr8	7600001	7700000	A	0.000485825	.
chr8	7700001	7900000	B	-0.00223438	.
chr8	7900001	8000000	A	0.00161989	.
chr8	8000001	8100000	B	-0.000900457	.
chr8	8100001	12900000	A	0.0235057	.
chr8	12900001	17200000	B	-0.0248284	.
chr8	17200001	17300000	A	0.0144176	.
chr8	17300001	17900000	B	-0.0136253	.
chr8	17900001	18100000	A	0.0247824	.
chr8	18100001	19300000	B	-0.0151248	.
chr8	19300001	19900000	A	0.0171758	.
chr8	19900001	20100000	B	-0.00500132	.
chr8	20100001	20500000	A	0.0111661	.
chr8	20500001	21000000	B	-0.00593911	.
chr8	21000001	23800000	A	0.024824	.
chr8	23800001	24300000	B	-0.0115519	.
chr8	24300001	24400000	A	0.000956604	.
chr8	24400001	25300000	B	-0.0158737	.
chr8	25300001	25500000	A	0.0204183	.
chr8	25500001	26000000	B	-0.014468	.
chr8	26000001	26800000	A	0.0194063	.
chr8	26800001	27200000	B	-0.00958263	.
chr8	27200001	31200000	A	0.032458	.
chr8	31200001	33400000	B	-0.0234348	.
chr8	33400001	33600000	A	0.0226139	.
chr8	33600001	37100000	B	-0.0216839	.
chr8	37100001	39100000	A	0.025181	.
chr8	39100001	39900000	B	-0.0204896	.
chr8	39900001	40000000	A	0.0145163	.
chr8	40000001	41200000	B	-0.0143144	.
chr8	41200001	43200000	A	0.025598	.
chr8	43200001	45800000	B	-0.00766207	.
chr8	45800001	45900000	A	0.000253854	.
chr8	45900001	47200000	B	-0.0221188	.
chr8	47200001	48100000	A	0.0234381	.
chr8	48100001	51800000	B	-0.0296848	.
chr8	51800001	52000000	A	0.0207458	.
chr8	52000001	52600000	B	-0.0221998	.
chr8	52600001	52700000	A	0.00882157	.
chr8	52700001	53600000	B	-0.0263541	.
chr8	53600001	54200000	A	0.0261625	.
chr8	54200001	55700000	B	-0.0243155	.
chr8	55700001	56200000	A	0.0286822	.
chr8	56200001	58000000	B	-0.0251797	.
chr8	58000001	59200000	A	0.0140709	.
chr8	59200001	60400000	B	-0.0246988	.
chr8	60400001	61200000	A	0.0310773	.
chr8	61200001	61500000	B	-0.00686417	.
chr8	61500001	61800000	A	0.0123158	.
chr8	61800001	63100000	B	-0.030123	.
chr8	63100001	63200000	A	0.0104394	.
chr8	63200001	64600000	B	-0.0304942	.
chr8	64600001	64900000	A	0.0235046	.
chr8	64900001	65600000	B	-0.0232439	.
chr8	65600001	67600000	A	0.0288544	.
chr8	67600001	69600000	B	-0.0327389	.
chr8	69600001	70700000	A	0.0269435	.
chr8	70700001	71800000	B	-0.0262412	.
chr8	71800001	72200000	A	0.0212248	.
chr8	72200001	72900000	B	-0.0269488	.
chr8	72900001	74100000	A	0.0228062	.
chr8	74100001	76900000	B	-0.0293001	.
chr8	76900001	77000000	A	0.00634939	.
chr8	77000001	78500000	B	-0.0322165	.
chr8	78500001	78900000	A	0.00910128	.
chr8	78900001	79600000	B	-0.0294353	.
chr8	79600001	80700000	A	0.0275958	.
chr8	80700001	80900000	B	-0.00363112	.
chr8	80900001	81400000	A	0.0211824	.
chr8	81400001	81600000	B	-0.00948531	.
chr8	81600001	81900000	A	0.0108006	.
chr8	81900001	85100000	B	-0.0339921	.
chr8	85100001	85300000	A	0.0245601	.
chr8	85300001	85700000	B	-0.0152395	.
chr8	85700001	85800000	A	0.000723336	.
chr8	85800001	86300000	B	-0.028657	.
chr8	86300001	86600000	A	0.0132447	.
chr8	86600001	89700000	B	-0.033752	.
chr8	89700001	90000000	A	0.0286483	.
chr8	90000001	90600000	B	-0.0217516	.
chr8	90600001	90700000	A	0.0130605	.
chr8	90700001	91000000	B	-0.0203287	.
chr8	91000001	91100000	A	0.0225433	.
chr8	91100001	93700000	B	-0.0304784	.
chr8	93700001	95400000	A	0.0299554	.
chr8	95400001	96100000	B	-0.0136256	.
chr8	96100001	96400000	A	0.0110941	.
chr8	96400001	97500000	B	-0.017933	.
chr8	97500001	103500000	A	0.0328389	.
chr8	103500001	104200000	B	-0.025206	.
chr8	104200001	104400000	A	0.00602683	.
chr8	104400001	104500000	B	-0.000249968	.
chr8	104500001	104600000	A	0.00240847	.
chr8	104600001	106600000	B	-0.0285407	.
chr8	106600001	106800000	A	0.0187264	.
chr8	106800001	108200000	B	-0.0295737	.
chr8	108200001	108300000	A	0.0139205	.
chr8	108300001	108400000	B	-0.00889296	.
chr8	108400001	108500000	A	0.016383	.
chr8	108500001	108900000	B	-0.0244603	.
chr8	108900001	109400000	A	0.00656048	.
chr8	109400001	109500000	B	-0.00774149	.
chr8	109500001	109700000	A	0.0148228	.
chr8	109700001	115100000	B	-0.0303278	.
chr8	115100001	115300000	A	0.0046985	.
chr8	115300001	116600000	B	-0.0217946	.
chr8	116600001	116900000	A	0.0232738	.
chr8	116900001	117800000	B	-0.0185477	.
chr8	117800001	118700000	A	0.0168131	.
chr8	118700001	119500000	B	-0.0204207	.
chr8	119500001	120100000	A	0.0129106	.
chr8	120100001	120400000	B	-0.0221531	.
chr8	120400001	120600000	A	0.00949317	.
chr8	120600001	120700000	B	-0.00289973	.
chr8	120700001	120900000	A	0.00954173	.
chr8	120900001	122600000	B	-0.0287344	.
chr8	122600001	125800000	A	0.0292889	.
chr8	125800001	126800000	B	-0.0188812	.
chr8	126800001	126900000	A	0.0014525	.
chr8	126900001	127100000	B	-0.00582667	.
chr8	127100001	128400000	A	0.0296063	.
chr8	128400001	129500000	B	-0.0152765	.
chr8	129500001	129600000	A	0.00466683	.
chr8	129600001	129800000	B	-0.0061206	.
chr8	129800001	130600000	A	0.0266826	.
chr8	130600001	131800000	B	-0.0250576	.
chr8	131800001	132000000	A	0.0118296	.
chr8	132000001	132700000	B	-0.0113362	.
chr8	132700001	134000000	A	0.019191	.
chr8	134000001	134400000	B	-0.00589804	.
chr8	134400001	134900000	A	0.0223755	.
chr8	134900001	139300000	B	-0.0276012	.
chr8	139300001	145138636	A	0.0239941	.
chr9	1	900000	A	0.00965043	.
chr9	900001	1800000	B	-0.0185036	.
chr9	1800001	2200000	A	0.0141325	.
chr9	2200001	2700000	B	-0.0159706	.
chr9	2700001	2900000	A	0.00225521	.
chr9	2900001	3200000	B	-0.026723	.
chr9	3200001	3700000	A	0.010993	.
chr9	3700001	4300000	B	-0.0120392	.
chr9	4300001	7100000	A	0.0257201	.
chr9	7100001	14600000	B	-0.036094	.
chr9	14600001	14700000	A	0.00179319	.
chr9	14700001	15400000	B	-0.0228907	.
chr9	15400001	15600000	A	0.0166993	.
chr9	15600001	19000000	B	-0.0358098	.
chr9	19000001	19500000	A	0.0191384	.
chr9	19500001	20300000	B	-0.0233619	.
chr9	20300001	21400000	A	0.0162461	.
chr9	21400001	26900000	B	-0.0348646	.
chr9	26900001	27000000	A	0.00780418	.
chr9	27000001	27300000	B	-0.0248507	.
chr9	27300001	27600000	A	0.00149729	.
chr9	27600001	32400000	B	-0.0365327	.
chr9	32400001	32600000	A	0.00634485	.
chr9	32600001	32900000	B	-0.0231089	.
chr9	32900001	38500000	A	0.0304046	.
chr9	38500001	39600000	B	-0.0046641	.
chr9	39600001	39700000	A	0.00059499	.
chr9	39700001	40200000	B	-0.00204694	.
chr9	40200001	40300000	A	9.18713e-06	.
chr9	40300001	40500000	B	-0.000395369	.
chr9	40500001	40700000	A	0.0011082	.
chr9	40700001	41100000	B	-0.00808863	.
chr9	41100001	41300000	A	0.00102992	.
chr9	41300001	43400000	B	-0.0134826	.
chr9	43400001	43500000	A	0.000577555	.
chr9	43500001	43600000	B	-5.73771e-08	.
chr9	43600001	43700000	A	0.000307848	.
chr9	43700001	43900000	B	-0.00129618	.
chr9	43900001	44000000	A	0.000563074	.
chr9	44000001	44300000	B	-0.0024349	.
chr9	44300001	44500000	A	0.000857946	.
chr9	44500001	44600000	B	-0.00164848	.
chr9	44600001	44700000	A	0.00064865	.
chr9	44700001	45000000	B	-0.00261999	.
chr9	45000001	45100000	A	0.000938692	.
chr9	45100001	45200000	B	-0.00347799	.
chr9	45200001	45300000	A	0.00123872	.
chr9	45300001	45400000	B	-0.000877997	.
chr9	45400001	60500000	A	9.10938e-06	.
chr9	60500001	60600000	B	-0.00619391	.
chr9	60600001	60800000	A	0.0007065	.
chr9	60800001	61000000	B	-0.000661782	.
chr9	61000001	61100000	A	0	.
chr9	61100001	62700000	B	-0.00568408	.
chr9	62700001	62900000	A	0.00541888	.
chr9	62900001	63200000	B	-0.00215427	.
chr9	63200001	63500000	A	0.000583764	.
chr9	63500001	64200000	B	-0.0168104	.
chr9	64200001	64300000	A	0	.
chr9	64300001	65000000	B	-0.00481262	.
chr9	65000001	65100000	A	0.00770944	.
chr9	65100001	65200000	B	-0.00182426	.
chr9	65200001	65300000	A	0.00249485	.
chr9	65300001	65600000	B	-0.0127937	.
chr9	65600001	65800000	A	0.00438686	.
chr9	65800001	66400000	B	-0.00186857	.
chr9	66400001	66500000	A	0	.
chr9	66500001	67900000	B	-0.00504465	.
chr9	67900001	68400000	A	0.000629884	.
chr9	68400001	68500000	B	-0.00426917	.
chr9	68500001	69300000	A	0.0159737	.
chr9	69300001	70300000	B	-0.021793	.
chr9	70300001	70500000	A	0.00245859	.
chr9	70500001	71800000	B	-0.0292241	.
chr9	71800001	72000000	A	0.00865657	.
chr9	72000001	72300000	B	-0.013548	.
chr9	72300001	72600000	A	0.00879552	.
chr9	72600001	75000000	B	-0.0344055	.
chr9	75000001	75100000	A	0.00147798	.
chr9	75100001	76400000	B	-0.0318805	.
chr9	76400001	76600000	A	0.00567837	.
chr9	76600001	77200000	B	-0.0180042	.
chr9	77200001	77400000	A	0.00488383	.
chr9	77400001	83600000	B	-0.0356888	.
chr9	83600001	84300000	A	0.00806933	.
chr9	84300001	84700000	B	-0.0113451	.
chr9	84700001	84800000	A	0.0152001	.
chr9	84800001	85500000	B	-0.0113162	.
chr9	85500001	86400000	A	0.0156143	.
chr9	86400001	87400000	B	-0.0239389	.
chr9	87400001	87700000	A	0.00880172	.
chr9	87700001	89200000	B	-0.0217428	.
chr9	89200001	100400000	A	0.0244213	.
chr9	100400001	105200000	B	-0.0335852	.
chr9	105200001	105600000	A	0.0058575	.
chr9	105600001	107200000	B	-0.0328764	.
chr9	107200001	107300000	A	0.00370836	.
chr9	107300001	108900000	B	-0.0274912	.
chr9	108900001	109500000	A	0.00973219	.
chr9	109500001	109900000	B	-0.0194556	.
chr9	109900001	110300000	A	0.0131942	.
chr9	110300001	111400000	B	-0.0193653	.
chr9	111400001	112900000	A	0.0202914	.
chr9	112900001	113100000	B	-0.023483	.
chr9	113100001	113700000	A	0.0220732	.
chr9	113700001	114100000	B	-0.00558821	.
chr9	114100001	114700000	A	0.0164751	.
chr9	114700001	120400000	B	-0.0303779	.
chr9	120400001	122500000	A	0.0237256	.
chr9	122500001	122700000	B	-0.00310183	.
chr9	122700001	138394717	A	0.0327945	.
chr10	1	1200000	A	0.0154131	.
chr10	1200001	2900000	B	-0.0223258	.
chr10	2900001	3300000	A	0.0101966	.
chr10	3300001	3400000	B	-0.0062119	.
chr10	3400001	4300000	A	0.020436	.
chr10	4300001	5400000	B	-0.0192611	.
chr10	5400001	7900000	A	0.0238824	.
chr10	7900001	11100000	B	-0.0297677	.
chr10	11100001	15300000	A	0.0311212	.
chr10	15300001	16400000	B	-0.0229852	.
chr10	16400001	16600000	A	0.000651069	.
chr10	16600001	17600000	B	-0.0123843	.
chr10	17600001	17800000	A	0.0133358	.
chr10	17800001	18600000	B	-0.0196387	.
chr10	18600001	18700000	A	0.00149034	.
chr10	18700001	21500000	B	-0.0293593	.
chr10	21500001	22000000	A	0.0272704	.
chr10	22000001	22200000	B	-0.0160074	.
chr10	22200001	23000000	A	0.0233317	.
chr10	23000001	23300000	B	-0.0159248	.
chr10	23300001	23500000	A	0.00133881	.
chr10	23500001	24600000	B	-0.0250209	.
chr10	24600001	25000000	A	0.0127254	.
chr10	25000001	26300000	B	-0.0295849	.
chr10	26300001	27400000	A	0.0305652	.
chr10	27400001	27500000	B	-0.00293271	.
chr10	27500001	27600000	A	0.00906181	.
chr10	27600001	28300000	B	-0.0235831	.
chr10	28300001	28400000	A	0.000480019	.
chr10	28400001	28500000	B	-0.00318356	.
chr10	28500001	28700000	A	0.0162319	.
chr10	28700001	29400000	B	-0.0222384	.
chr10	29400001	29500000	A	0.00571034	.
chr10	29500001	30000000	B	-0.0101878	.
chr10	30000001	32500000	A	0.0264585	.
chr10	32500001	32900000	B	-0.0267495	.
chr10	32900001	33000000	A	0.010803	.
chr10	33000001	34500000	B	-0.0242202	.
chr10	34500001	35600000	A	0.0113462	.
chr10	35600001	38000000	B	-0.0300821	.
chr10	38000001	38100000	A	0.000199655	.
chr10	38100001	39900000	B	-0.0234384	.
chr10	39900001	40500000	A	0.00315729	.
chr10	40500001	40600000	B	-0.000119704	.
chr10	40600001	40700000	A	0.00199234	.
chr10	40700001	40900000	B	-0.00145922	.
chr10	40900001	41300000	A	0.00275102	.
chr10	41300001	41400000	B	-0.0002097	.
chr10	41400001	41600000	A	0.00462764	.
chr10	41600001	43100000	B	-0.0210456	.
chr10	43100001	43500000	A	0.00828606	.
chr10	43500001	44900000	B	-0.0192089	.
chr10	44900001	47800000	A	0.0135653	.
chr10	47800001	47900000	B	-0.00269578	.
chr10	47900001	48000000	A	0.00396678	.
chr10	48000001	48100000	B	-0.00100268	.
chr10	48100001	50700000	A	0.0249178	.
chr10	50700001	58200000	B	-0.0342221	.
chr10	58200001	58400000	A	0.00956351	.
chr10	58400001	59800000	B	-0.0262906	.
chr10	59800001	59900000	A	0.0174535	.
chr10	59900001	61800000	B	-0.0222008	.
chr10	61800001	62300000	A	0.0162086	.
chr10	62300001	62400000	B	-0.0193091	.
chr10	62400001	63800000	A	0.023486	.
chr10	63800001	67700000	B	-0.0348183	.
chr10	67700001	75400000	A	0.0310392	.
chr10	75400001	77400000	B	-0.0200849	.
chr10	77400001	80300000	A	0.0132376	.
chr10	80300001	80400000	B	-0.00393391	.
chr10	80400001	80600000	A	0.0138942	.
chr10	80600001	84100000	B	-0.0334242	.
chr10	84100001	84200000	A	0.0095123	.
chr10	84200001	84300000	B	-0.00139675	.
chr10	84300001	84400000	A	0.0082231	.
chr10	84400001	86300000	B	-0.0211854	.
chr10	86300001	89900000	A	0.0330074	.
chr10	89900001	90000000	B	-0.00205884	.
chr10	90000001	90100000	A	0.00217896	.
chr10	90100001	90800000	B	-0.0238359	.
chr10	90800001	91500000	A	0.0201131	.
chr10	91500001	91600000	B	-0.00466017	.
chr10	91600001	93900000	A	0.0280034	.
chr10	93900001	94200000	B	-0.0102772	.
chr10	94200001	94600000	A	0.0199252	.
chr10	94600001	95200000	B	-0.0229186	.
chr10	95200001	98500000	A	0.0306123	.
chr10	98500001	99300000	B	-0.0206993	.
chr10	99300001	104400000	A	0.0327445	.
chr10	104400001	106900000	B	-0.0300525	.
chr10	106900001	107000000	A	0.00114665	.
chr10	107000001	109900000	B	-0.0331584	.
chr10	109900001	111100000	A	0.0286803	.
chr10	111100001	112300000	B	-0.0230838	.
chr10	112300001	112700000	A	0.0119502	.
chr10	112700001	113600000	B	-0.0103243	.
chr10	113600001	114600000	A	0.0181324	.
chr10	114600001	114800000	B	-0.00532191	.
chr10	114800001	115000000	A	0.00768232	.
chr10	115000001	117200000	B	-0.029971	.
chr10	117200001	117700000	A	0.0135677	.
chr10	117700001	118000000	B	-0.0049403	.
chr10	118000001	118100000	A	0.0105247	.
chr10	118100001	118300000	B	-0.0092041	.
chr10	118300001	118400000	A	0.00882018	.
chr10	118400001	118500000	B	-0.00338634	.
chr10	118500001	120000000	A	0.0292172	.
chr10	120000001	120800000	B	-0.0108062	.
chr10	120800001	120900000	A	0.0145634	.
chr10	120900001	121700000	B	-0.014863	.
chr10	121700001	122100000	A	0.0165869	.
chr10	122100001	122200000	B	-0.00022148	.
chr10	122200001	125200000	A	0.0233449	.
chr10	125200001	125700000	B	-0.00694746	.
chr10	125700001	125900000	A	0.0195263	.
chr10	125900001	128000000	B	-0.0296393	.
chr10	128000001	128200000	A	0.00965493	.
chr10	128200001	130100000	B	-0.0248432	.
chr10	130100001	130200000	A	0.00466307	.
chr10	130200001	131900000	B	-0.0295955	.
chr10	131900001	132000000	A	0.0143597	.
chr10	132000001	132100000	B	-0.0049913	.
chr10	132100001	132800000	A	0.0163259	.
chr10	132800001	132900000	B	-0.000758787	.
chr10	132900001	133000000	A	0.00408033	.
chr10	133000001	133100000	B	-0.00357779	.
chr10	133100001	133500000	A	0.0130222	.
chr10	133500001	133700000	B	-0.00289078	.
chr10	133700001	133797422	A	0	.
chr11	1	4200000	A	0.0248162	.
chr11	4200001	5600000	B	-0.0260139	.
chr11	5600001	5700000	A	0.0120109	.
chr11	5700001	6300000	B	-0.0241308	.
chr11	6300001	6800000	A	0.0166764	.
chr11	6800001	7500000	B	-0.0216335	.
chr11	7500001	7700000	A	0.0104294	.
chr11	7700001	8100000	B	-0.0192833	.
chr11	8100001	12300000	A	0.0189511	.
chr11	12300001	13200000	B	-0.0176506	.
chr11	13200001	13400000	A	0.00745466	.
chr11	13400001	14200000	B	-0.0248855	.
chr11	14200001	14600000	A	0.00982944	.
chr11	14600001	16800000	B	-0.0321389	.
chr11	16800001	18900000	A	0.0182315	.
chr11	18900001	19100000	B	-0.00801619	.
chr11	19100001	19600000	A	0.0121583	.
chr11	19600001	19700000	B	-0.00354465	.
chr11	19700001	19800000	A	0.00432819	.
chr11	19800001	20400000	B	-0.0101046	.
chr11	20400001	20500000	A	0.000798917	.
chr11	20500001	32500000	B	-0.0316222	.
chr11	32500001	32600000	A	0.00291951	.
chr11	32600001	32700000	B	-0.00319114	.
chr11	32700001	34700000	A	0.0221733	.
chr11	34700001	34800000	B	-0.00566853	.
chr11	34800001	35400000	A	0.0178173	.
chr11	35400001	35600000	B	-0.00833038	.
chr11	35600001	35800000	A	0.00539835	.
chr11	35800001	43700000	B	-0.0313096	.
chr11	43700001	43900000	A	0.00219522	.
chr11	43900001	44000000	B	-0.000576548	.
chr11	44000001	44400000	A	0.00365395	.
chr11	44400001	44500000	B	-0.000376956	.
chr11	44500001	48100000	A	0.0199714	.
chr11	48100001	50900000	B	-0.031495	.
chr11	50900001	51400000	A	0.000806024	.
chr11	51400001	51600000	B	-0.00138925	.
chr11	51600001	51800000	A	0.00438697	.
chr11	51800001	52000000	B	-0.000659225	.
chr11	52000001	52100000	A	0.000649004	.
chr11	52100001	52200000	B	-0.000333164	.
chr11	52200001	52500000	A	0.00258417	.
chr11	52500001	52600000	B	-0.000382957	.
chr11	52600001	52900000	A	0.00124537	.
chr11	52900001	53000000	B	-0.000225199	.
chr11	53000001	53300000	A	0.00154851	.
chr11	53300001	53400000	B	-0.000737985	.
chr11	53400001	53500000	A	0.000304475	.
chr11	53500001	53600000	B	-0.000742655	.
chr11	53600001	54100000	A	0.00177198	.
chr11	54100001	54200000	B	-0.000673575	.
chr11	54200001	54500000	A	0.00284667	.
chr11	54500001	57300000	B	-0.0338608	.
chr11	57300001	57800000	A	0.016163	.
chr11	57800001	58500000	B	-0.0292202	.
chr11	58500001	58700000	A	0.00789388	.
chr11	58700001	59100000	B	-0.0187328	.
chr11	59100001	59300000	A	0.0149127	.
chr11	59300001	59500000	B	-0.00981192	.
chr11	59500001	59800000	A	0.0140946	.
chr11	59800001	60200000	B	-0.0128919	.
chr11	60200001	78600000	A	0.0270643	.
chr11	78600001	82900000	B	-0.0276977	.
chr11	82900001	83300000	A	0.0160655	.
chr11	83300001	85600000	B	-0.0335395	.
chr11	85600001	85700000	A	0.00117174	.
chr11	85700001	85900000	B	-0.0101143	.
chr11	85900001	86400000	A	0.0177539	.
chr11	86400001	88300000	B	-0.0236641	.
chr11	88300001	88400000	A	0.00754382	.
chr11	88400001	93600000	B	-0.0326127	.
chr11	93600001	93800000	A	0.00912281	.
chr11	93800001	94400000	B	-0.0244832	.
chr11	94400001	94600000	A	0.00694554	.
chr11	94600001	95000000	B	-0.0116784	.
chr11	95000001	95300000	A	0.00987523	.
chr11	95300001	95700000	B	-0.00290776	.
chr11	95700001	95900000	A	0.00686974	.
chr11	95900001	96000000	B	-0.000562439	.
chr11	96000001	96400000	A	0.0102786	.
chr11	96400001	102300000	B	-0.0352472	.
chr11	102300001	102600000	A	0.0166789	.
chr11	102600001	107700000	B	-0.030498	.
chr11	107700001	108900000	A	0.0173518	.
chr11	108900001	109900000	B	-0.0304419	.
chr11	109900001	110500000	A	0.013671	.
chr11	110500001	111200000	B	-0.0176604	.
chr11	111200001	112300000	A	0.0210062	.
chr11	112300001	112500000	B	-0.00608672	.
chr11	112500001	112600000	A	0.000772191	.
chr11	112600001	113300000	B	-0.0101253	.
chr11	113300001	113400000	A	0.00847717	.
chr11	113400001	113700000	B	-0.00293074	.
chr11	113700001	113900000	A	0.0152053	.
chr11	113900001	115200000	B	-0.0181958	.
chr11	115200001	115300000	A	0.00149818	.
chr11	115300001	115500000	B	-0.00344226	.
chr11	115500001	116300000	A	0.00823359	.
chr11	116300001	116400000	B	-0.00109598	.
chr11	116400001	121700000	A	0.0297025	.
chr11	121700001	122600000	B	-0.0169009	.
chr11	122600001	123600000	A	0.0175075	.
chr11	123600001	124600000	B	-0.0252865	.
chr11	124600001	125700000	A	0.0187122	.
chr11	125700001	125800000	B	-0.00726357	.
chr11	125800001	126500000	A	0.0181728	.
chr11	126500001	128300000	B	-0.0243432	.
chr11	128300001	128800000	A	0.0179477	.
chr11	128800001	129900000	B	-0.0251994	.
chr11	129900001	130400000	A	0.017114	.
chr11	130400001	133900000	B	-0.0259072	.
chr11	133900001	134400000	A	0.00961611	.
chr11	134400001	135000000	B	-0.00655235	.
chr11	135000001	135086622	A	0	.
chr12	1	10800000	A	0.0242861	.
chr12	10800001	11000000	B	-0.00284159	.
chr12	11000001	11200000	A	0.00991639	.
chr12	11200001	11500000	B	-0.0105032	.
chr12	11500001	13300000	A	0.0270075	.
chr12	13300001	14100000	B	-0.0159918	.
chr12	14100001	15000000	A	0.0116769	.
chr12	15000001	22600000	B	-0.0282535	.
chr12	22600001	22700000	A	0.000517812	.
chr12	22700001	24800000	B	-0.0273485	.
chr12	24800001	25500000	A	0.0207432	.
chr12	25500001	26000000	B	-0.00925996	.
chr12	26000001	27800000	A	0.0270717	.
chr12	27800001	31000000	B	-0.0213003	.
chr12	31000001	32400000	A	0.0201981	.
chr12	32400001	32600000	B	-0.00408191	.
chr12	32600001	32700000	A	0.000106008	.
chr12	32700001	34800000	B	-0.0285938	.
chr12	34800001	34900000	A	0.000684394	.
chr12	34900001	35000000	B	-0.0017228	.
chr12	35000001	35100000	A	0.0005221	.
chr12	35100001	35300000	B	-0.00276197	.
chr12	35300001	35500000	A	0.0030905	.
chr12	35500001	35600000	B	-0.00111342	.
chr12	35600001	35700000	A	0.0010318	.
chr12	35700001	35800000	B	-0.00299789	.
chr12	35800001	36100000	A	0.00337135	.
chr12	36100001	36200000	B	-0.00258025	.
chr12	36200001	36400000	A	0.00641136	.
chr12	36400001	36500000	B	-0.00130317	.
chr12	36500001	36800000	A	0.00226307	.
chr12	36800001	36900000	B	-0.00210966	.
chr12	36900001	37200000	A	0.00623606	.
chr12	37200001	40100000	B	-0.0278942	.
chr12	40100001	40300000	A	0.00746369	.
chr12	40300001	42100000	B	-0.0326412	.
chr12	42100001	42500000	A	0.0140863	.
chr12	42500001	45200000	B	-0.03101	.
chr12	45200001	45300000	A	0.0116647	.
chr12	45300001	45600000	B	-0.00830787	.
chr12	45600001	46600000	A	0.0170723	.
chr12	46600001	47200000	B	-0.0134114	.
chr12	47200001	47400000	A	0.0137472	.
chr12	47400001	47600000	B	-0.0145793	.
chr12	47600001	54700000	A	0.0293409	.
chr12	54700001	54900000	B	-0.00488265	.
chr12	54900001	55100000	A	0.00625582	.
chr12	55100001	55600000	B	-0.0141742	.
chr12	55600001	58000000	A	0.029739	.
chr12	58000001	62300000	B	-0.0345718	.
chr12	62300001	62700000	A	0.00776866	.
chr12	62700001	64400000	B	-0.028542	.
chr12	64400001	64900000	A	0.0201277	.
chr12	64900001	65100000	B	-0.0223525	.
chr12	65100001	65300000	A	0.00888501	.
chr12	65300001	66000000	B	-0.0275183	.
chr12	66000001	66300000	A	0.0101199	.
chr12	66300001	67300000	B	-0.0242221	.
chr12	67300001	67400000	A	0.000992757	.
chr12	67400001	67600000	B	-0.00663806	.
chr12	67600001	67700000	A	0.0106453	.
chr12	67700001	68000000	B	-0.00779962	.
chr12	68000001	69600000	A	0.0227578	.
chr12	69600001	71600000	B	-0.0291123	.
chr12	71600001	71700000	A	0.00901589	.
chr12	71700001	75900000	B	-0.0315504	.
chr12	75900001	76200000	A	0.0105197	.
chr12	76200001	76400000	B	-0.00908599	.
chr12	76400001	76600000	A	0.00378308	.
chr12	76600001	79600000	B	-0.0319436	.
chr12	79600001	79700000	A	0.00564394	.
chr12	79700001	79800000	B	-0.0116612	.
chr12	79800001	79900000	A	0.00642303	.
chr12	79900001	89600000	B	-0.0318292	.
chr12	89600001	90000000	A	0.0134698	.
chr12	90000001	92000000	B	-0.0287384	.
chr12	92000001	96600000	A	0.0241182	.
chr12	96600001	98500000	B	-0.0281168	.
chr12	98500001	98700000	A	0.0191817	.
chr12	98700001	100100000	B	-0.0285569	.
chr12	100100001	100300000	A	0.0130557	.
chr12	100300001	101300000	B	-0.0239182	.
chr12	101300001	101500000	A	0.00954584	.
chr12	101500001	101600000	B	-0.000267655	.
chr12	101600001	102300000	A	0.0215499	.
chr12	102300001	102400000	B	-0.000410835	.
chr12	102400001	102600000	A	0.00806376	.
chr12	102600001	102700000	B	-0.00634533	.
chr12	102700001	114000000	A	0.0242109	.
chr12	114000001	115900000	B	-0.0150385	.
chr12	115900001	117400000	A	0.0217277	.
chr12	117400001	117800000	B	-0.00360934	.
chr12	117800001	118500000	A	0.0211626	.
chr12	118500001	119300000	B	-0.00243955	.
chr12	119300001	125200000	A	0.0296624	.
chr12	125200001	128800000	B	-0.0294228	.
chr12	128800001	128900000	A	0.00930188	.
chr12	128900001	130800000	B	-0.026567	.
chr12	130800001	133275309	A	0.0216183	.
chr13	1	19500000	A	0.00219355	.
chr13	19500001	21700000	B	-0.0295404	.
chr13	21700001	22000000	A	0.0231033	.
chr13	22000001	22200000	B	-0.0160819	.
chr13	22200001	23300000	A	0.0292392	.
chr13	23300001	25400000	B	-0.0303758	.
chr13	25400001	26100000	A	0.013234	.
chr13	26100001	26500000	B	-0.0134151	.
chr13	26500001	26700000	A	0.00712775	.
chr13	26700001	28800000	B	-0.0296864	.
chr13	28800001	29400000	A	0.0178502	.
chr13	29400001	31200000	B	-0.0284091	.
chr13	31200001	31800000	A	0.0243175	.
chr13	31800001	33900000	B	-0.0270418	.
chr13	33900001	36800000	A	0.0305746	.
chr13	36800001	37100000	B	-0.0157815	.
chr13	37100001	39000000	A	0.0336611	.
chr13	39000001	39100000	B	-0.0182177	.
chr13	39100001	39500000	A	0.00521365	.
chr13	39500001	47200000	B	-0.0301992	.
chr13	47200001	47900000	A	0.018993	.
chr13	47900001	52900000	B	-0.0315699	.
chr13	52900001	59700000	A	0.036642	.
chr13	59700001	60600000	B	-0.0177892	.
chr13	60600001	72700000	A	0.0360264	.
chr13	72700001	73100000	B	-0.0259911	.
chr13	73100001	73700000	A	0.0206014	.
chr13	73700001	74200000	B	-0.0292036	.
chr13	74200001	75200000	A	0.0276488	.
chr13	75200001	75900000	B	-0.0279481	.
chr13	75900001	76800000	A	0.0266152	.
chr13	76800001	77800000	B	-0.0319308	.
chr13	77800001	77900000	A	0.00383693	.
chr13	77900001	78000000	B	-0.000358035	.
chr13	78000001	78100000	A	0.00109874	.
chr13	78100001	78200000	B	-0.00112547	.
chr13	78200001	78600000	A	0.0142411	.
chr13	78600001	78700000	B	-0.0243474	.
chr13	78700001	79000000	A	0.0192102	.
chr13	79000001	79600000	B	-0.0256632	.
chr13	79600001	80300000	A	0.0182078	.
chr13	80300001	80400000	B	-0.00160985	.
chr13	80400001	91300000	A	0.0385326	.
chr13	91300001	91500000	B	-0.0156055	.
chr13	91500001	94500000	A	0.0335344	.
chr13	94500001	94700000	B	-0.0244804	.
chr13	94700001	95000000	A	0.00895499	.
chr13	95000001	96100000	B	-0.0265341	.
chr13	96100001	97100000	A	0.0361883	.
chr13	97100001	97600000	B	-0.0231776	.
chr13	97600001	97900000	A	0.0153562	.
chr13	97900001	100700000	B	-0.0290357	.
chr13	100700001	102500000	A	0.0253917	.
chr13	102500001	103200000	B	-0.0235399	.
chr13	103200001	106500000	A	0.0316273	.
chr13	106500001	106600000	B	-0.012876	.
chr13	106600001	108200000	A	0.0356234	.
chr13	108200001	108300000	B	-0.0224531	.
chr13	108300001	109100000	A	0.0247399	.
chr13	109100001	109200000	B	-0.0177104	.
chr13	109200001	110100000	A	0.020787	.
chr13	110100001	111500000	B	-0.0252553	.
chr13	111500001	112400000	A	0.019917	.
chr13	112400001	114300000	B	-0.0284204	.
chr13	114300001	114364328	A	0	.
chr14	1	16000000	A	0	.
chr14	16000001	16100000	B	-0.0163688	.
chr14	16100001	17200000	A	0	.
chr14	17200001	17300000	B	-0.000312772	.
chr14	17300001	18200000	A	0	.
chr14	18200001	18300000	B	-0.00225867	.
chr14	18300001	20300000	A	0.0230515	.
chr14	20300001	21700000	B	-0.022218	.
chr14	21700001	21900000	A	0.00427796	.
chr14	21900001	24500000	B	-0.0284694	.
chr14	24500001	24600000	A	0.0115476	.
chr14	24600001	24700000	B	-0.00471027	.
chr14	24700001	30600000	A	0.0393282	.
chr14	30600001	31500000	B	-0.0268573	.
chr14	31500001	32100000	A	0.0175968	.
chr14	32100001	32200000	B	-0.00803889	.
chr14	32200001	33900000	A	0.0334402	.
chr14	33900001	34100000	B	-0.00844682	.
chr14	34100001	34400000	A	0.00971921	.
chr14	34400001	36000000	B	-0.0305176	.
chr14	36000001	39000000	A	0.0368698	.
chr14	39000001	39500000	B	-0.0117224	.
chr14	39500001	44900000	A	0.0403992	.
chr14	44900001	45300000	B	-0.00996739	.
chr14	45300001	49500000	A	0.0406904	.
chr14	49500001	52100000	B	-0.026658	.
chr14	52100001	52300000	A	0.0117529	.
chr14	52300001	53200000	B	-0.0226409	.
chr14	53200001	53600000	A	0.0142786	.
chr14	53600001	53700000	B	-0.00169023	.
chr14	53700001	54300000	A	0.0242564	.
chr14	54300001	55800000	B	-0.0327193	.
chr14	55800001	57200000	A	0.0189269	.
chr14	57200001	57300000	B	-0.0195426	.
chr14	57300001	58100000	A	0.026005	.
chr14	58100001	58900000	B	-0.0169049	.
chr14	58900001	59100000	A	0.00167885	.
chr14	59100001	59500000	B	-0.0219124	.
chr14	59500001	60100000	A	0.0311873	.
chr14	60100001	60300000	B	-0.0197267	.
chr14	60300001	60700000	A	0.0267751	.
chr14	60700001	61000000	B	-0.00910676	.
chr14	61000001	61400000	A	0.0124361	.
chr14	61400001	61900000	B	-0.021323	.
chr14	61900001	63300000	A	0.0375668	.
chr14	63300001	66000000	B	-0.0347549	.
chr14	66000001	66400000	A	0.00846167	.
chr14	66400001	66800000	B	-0.0137283	.
chr14	66800001	66900000	A	0.00766843	.
chr14	66900001	77900000	B	-0.0364169	.
chr14	77900001	80900000	A	0.0304031	.
chr14	80900001	81000000	B	-0.00390351	.
chr14	81000001	81100000	A	0.0269338	.
chr14	81100001	81300000	B	-0.0015603	.
chr14	81300001	89100000	A	0.0360262	.
chr14	89100001	90100000	B	-0.0202718	.
chr14	90100001	90200000	A	0.0103105	.
chr14	90200001	94200000	B	-0.0298422	.
chr14	94200001	94300000	A	0.00556088	.
chr14	94300001	94400000	B	-0.00073575	.
chr14	94400001	94900000	A	0.00341948	.
chr14	94900001	96600000	B	-0.0227194	.
chr14	96600001	96700000	A	0.000921868	.
chr14	96700001	96900000	B	-0.0110742	.
chr14	96900001	99400000	A	0.0378302	.
chr14	99400001	100700000	B	-0.0202886	.
chr14	100700001	101600000	A	0.0241185	.
chr14	101600001	106900000	B	-0.0331863	.
chr14	106900001	107043718	A	0	.
chr15	1	17000000	A	0	.
chr15	17000001	17100000	B	-0.0111691	.
chr15	17100001	17600000	A	0.0108191	.
chr15	17600001	17700000	B	-0.000172607	.
chr15	17700001	17800000	A	0.0112682	.
chr15	17800001	17900000	B	-0.00594474	.
chr15	17900001	18100000	A	0.0078094	.
chr15	18100001	18300000	B	-0.00511725	.
chr15	18300001	18500000	A	0.00903714	.
chr15	18500001	18600000	B	-0.000910816	.
chr15	18600001	18700000	A	0	.
chr15	18700001	18800000	B	-0.00392959	.
chr15	18800001	19100000	A	0.00256804	.
chr15	19100001	19200000	B	-0.00312821	.
chr15	19200001	19400000	A	0.00519588	.
chr15	19400001	19500000	B	-0.00132602	.
chr15	19500001	19700000	A	0.00901434	.
chr15	19700001	21100000	B	-0.0303158	.
chr15	21100001	21200000	A	0.00562023	.
chr15	21200001	22700000	B	-0.0186723	.
chr15	22700001	23000000	A	0.00722329	.
chr15	23000001	30100000	B	-0.0364384	.
chr15	30100001	30200000	A	0.00107154	.
chr15	30200001	30400000	B	-0.0103292	.
chr15	30400001	31500000	A	0.0212099	.
chr15	31500001	32400000	B	-0.0248544	.
chr15	32400001	32700000	A	0.00673756	.
chr15	32700001	32900000	B	-0.00671956	.
chr15	32900001	33000000	A	0.00174501	.
chr15	33000001	34000000	B	-0.0175674	.
chr15	34000001	34600000	A	0.0188162	.
chr15	34600001	34900000	B	-0.0176883	.
chr15	34900001	35000000	A	0.00681187	.
chr15	35000001	38500000	B	-0.0377082	.
chr15	38500001	38700000	A	0.00718724	.
chr15	38700001	39700000	B	-0.0277595	.
chr15	39700001	45600000	A	0.0382123	.
chr15	45600001	48700000	B	-0.0348966	.
chr15	48700001	49200000	A	0.00518858	.
chr15	49200001	50200000	B	-0.0317013	.
chr15	50200001	52700000	A	0.0228448	.
chr15	52700001	55200000	B	-0.0403744	.
chr15	55200001	55300000	A	0.00121544	.
chr15	55300001	56400000	B	-0.0224167	.
chr15	56400001	56500000	A	0.000272142	.
chr15	56500001	56600000	B	-0.0148428	.
chr15	56600001	57600000	A	0.0183214	.
chr15	57600001	58200000	B	-0.00844261	.
chr15	58200001	59800000	A	0.0376005	.
chr15	59800001	60300000	B	-0.0101168	.
chr15	60300001	60900000	A	0.0205129	.
chr15	60900001	61800000	B	-0.0222454	.
chr15	61800001	62100000	A	0.0195054	.
chr15	62100001	62600000	B	-0.00688979	.
chr15	62600001	70900000	A	0.0377767	.
chr15	70900001	71700000	B	-0.00797601	.
chr15	71700001	79500000	A	0.0375132	.
chr15	79500001	79600000	B	-0.000283349	.
chr15	79600001	80300000	A	0.0249873	.
chr15	80300001	80900000	B	-0.00786166	.
chr15	80900001	81100000	A	0.0169658	.
chr15	81100001	81200000	B	-0.00609145	.
chr15	81200001	81400000	A	0.00969819	.
chr15	81400001	82100000	B	-0.0311508	.
chr15	82100001	83200000	A	0.0215081	.
chr15	83200001	83900000	B	-0.0236188	.
chr15	83900001	84000000	A	0.0056128	.
chr15	84000001	84500000	B	-0.0071883	.
chr15	84500001	85800000	A	0.0255881	.
chr15	85800001	88600000	B	-0.0422466	.
chr15	88600001	88700000	A	0.0085004	.
chr15	88700001	88900000	B	-0.0119747	.
chr15	88900001	91100000	A	0.0346379	.
chr15	91100001	92800000	B	-0.0239904	.
chr15	92800001	93000000	A	0.0238826	.
chr15	93000001	99100000	B	-0.0392942	.
chr15	99100001	99800000	A	0.0187954	.
chr15	99800001	100900000	B	-0.025317	.
chr15	100900001	101300000	A	0.0239543	.
chr15	101300001	101600000	B	-0.0157259	.
chr15	101600001	101700000	A	0.00135994	.
chr15	101700001	101900000	B	-0.0218287	.
chr15	101900001	101991189	A	0	.
chr16	1	5100000	B	-0.0293803	.
chr16	5100001	8800000	A	0.0391787	.
chr16	8800001	9200000	B	-0.0206527	.
chr16	9200001	10200000	A	0.0260591	.
chr16	10200001	12600000	B	-0.0297575	.
chr16	12600001	13900000	A	0.0335348	.
chr16	13900001	16300000	B	-0.0325164	.
chr16	16300001	17000000	A	0.00959657	.
chr16	17000001	17500000	B	-0.0178957	.
chr16	17500001	18300000	A	0.0219561	.
chr16	18300001	18600000	B	-0.00712496	.
chr16	18600001	18700000	A	0.00122986	.
chr16	18700001	19800000	B	-0.0228407	.
chr16	19800001	20600000	A	0.0190093	.
chr16	20600001	21400000	B	-0.0301339	.
chr16	21400001	21500000	A	0.00335821	.
chr16	21500001	24300000	B	-0.0313133	.
chr16	24300001	24400000	A	0.00651305	.
chr16	24400001	25300000	B	-0.0245759	.
chr16	25300001	27100000	A	0.0378824	.
chr16	27100001	27800000	B	-0.0231745	.
chr16	27800001	27900000	A	0.00198992	.
chr16	27900001	31500000	B	-0.0361371	.
chr16	31500001	32700000	A	0.0355239	.
chr16	32700001	32800000	B	-0.00200666	.
chr16	32800001	33300000	A	0.0207316	.
chr16	33300001	33400000	B	-0.0202137	.
chr16	33400001	36400000	A	0.0338575	.
chr16	36400001	36600000	B	-0.000357184	.
chr16	36600001	36700000	A	0.0111416	.
chr16	36700001	36800000	B	-0.0099471	.
chr16	36800001	36900000	A	0.00554923	.
chr16	36900001	37200000	B	-0.00962434	.
chr16	37200001	37300000	A	0.00587152	.
chr16	37300001	37400000	B	-0.00248196	.
chr16	37400001	37700000	A	0.00448334	.
chr16	37700001	38000000	B	-0.00764032	.
chr16	38000001	38100000	A	0.00724745	.
chr16	38100001	38300000	B	-0.00837039	.
chr16	38300001	46600000	A	0.00100702	.
chr16	46600001	47200000	B	-0.0157676	.
chr16	47200001	47400000	A	0.0119036	.
chr16	47400001	47600000	B	-0.0115324	.
chr16	47600001	48200000	A	0.0320298	.
chr16	48200001	48600000	B	-0.0129303	.
chr16	48600001	50000000	A	0.0274259	.
chr16	50000001	50400000	B	-0.0309243	.
chr16	50400001	50500000	A	0.0071802	.
chr16	50500001	50800000	B	-0.0180158	.
chr16	50800001	53000000	A	0.0455687	.
chr16	53000001	53300000	B	-0.0118434	.
chr16	53300001	53400000	A	0.0143351	.
chr16	53400001	53500000	B	-0.00547158	.
chr16	53500001	56300000	A	0.0351184	.
chr16	56300001	58700000	B	-0.0318329	.
chr16	58700001	66400000	A	0.0462165	.
chr16	66400001	70900000	B	-0.0390042	.
chr16	70900001	71400000	A	0.0141711	.
chr16	71400001	72100000	B	-0.0299334	.
chr16	72100001	72600000	A	0.0194627	.
chr16	72600001	72700000	B	-0.0132878	.
chr16	72700001	74300000	A	0.0358256	.
chr16	74300001	75700000	B	-0.0268607	.
chr16	75700001	80900000	A	0.041731	.
chr16	80900001	82000000	B	-0.0216275	.
chr16	82000001	83800000	A	0.0351465	.
chr16	83800001	86200000	B	-0.0283969	.
chr16	86200001	86500000	A	0.00624643	.
chr16	86500001	86600000	B	-0.0110391	.
chr16	86600001	87200000	A	0.00795076	.
chr16	87200001	90300000	B	-0.0245942	.
chr16	90300001	90338345	A	0	.
chr17	1	3100000	A	0.0245123	.
chr17	3100001	3500000	B	-0.00716547	.
chr17	3500001	5700000	A	0.0366406	.
chr17	5700001	6400000	B	-0.00798025	.
chr17	6400001	9000000	A	0.0327625	.
chr17	9000001	9200000	B	-0.00334057	.
chr17	9200001	9300000	A	0.00164667	.
chr17	9300001	16000000	B	-0.0392401	.
chr17	16000001	16600000	A	0.0170767	.
chr17	16600001	16800000	B	-0.00605776	.
chr17	16800001	20000000	A	0.0276976	.
chr17	20000001	22800000	B	-0.0300469	.
chr17	22800001	23000000	A	0.000781728	.
chr17	23000001	23200000	B	-0.00391065	.
chr17	23200001	23400000	A	0.00209631	.
chr17	23400001	23500000	B	-0.000670958	.
chr17	23500001	23600000	A	0.00020128	.
chr17	23600001	23900000	B	-0.00219267	.
chr17	23900001	24000000	A	0.000326052	.
chr17	24000001	24100000	B	-0.000340898	.
chr17	24100001	24200000	A	0.00052567	.
chr17	24200001	24400000	B	-0.00214409	.
chr17	24400001	24600000	A	0.00507931	.
chr17	24600001	24800000	B	-0.00264168	.
chr17	24800001	24900000	A	0.00072265	.
chr17	24900001	25100000	B	-0.00514661	.
chr17	25100001	25300000	A	0.0017953	.
chr17	25300001	25400000	B	-0.00209368	.
chr17	25400001	25500000	A	0.00201609	.
chr17	25500001	25600000	B	-0.000963107	.
chr17	25600001	25800000	A	0.00333108	.
chr17	25800001	26000000	B	-0.00808772	.
chr17	26000001	26300000	A	0.0016236	.
chr17	26300001	26400000	B	-0.000421407	.
chr17	26400001	26600000	A	0.000598854	.
chr17	26600001	28000000	B	-0.0286695	.
chr17	28000001	32900000	A	0.0389787	.
chr17	32900001	34900000	B	-0.0218909	.
chr17	34900001	36300000	A	0.0343855	.
chr17	36300001	36400000	B	-0.00432546	.
chr17	36400001	37900000	A	0.0400196	.
chr17	37900001	38200000	B	-0.00337873	.
chr17	38200001	40900000	A	0.0440753	.
chr17	40900001	41500000	B	-0.00461076	.
chr17	41500001	46300000	A	0.0409595	.
chr17	46300001	46500000	B	-0.00590185	.
chr17	46500001	46600000	A	0.00512742	.
chr17	46600001	46700000	B	-0.00656294	.
[truncated: 263 more rows]
