# Supplementary material for: An integrative TAD catalog in lymphoblastoid cell lines discloses the functional impact of deletions and insertions in human genomes
Source: HighWire-hosted journal article supplement (doi:10.1101/gr.279419.124), 2024-12-01
Supplement: Supplemental_Table_S17.xlsx [file Supplemental_Table_S17.xlsx]

## Sheet: Table S18
Table S17. Replications in another independent dataset
	Total deletion	Total insertion	Significant deletion	Significant insertion	Total TAD-SVs	To be replicated TAD-SVs			Top 25% replication set				Top 50% replication set				Top 75% replication set
Discovery set of TAD-SVs (26 samples, SV_allele >= 5/26)	1740	2510	66	119	185	Deletion	Insertion	Total	Deletion	Insertion	Total	Replication rate	Deletion	Insertion	Total	Replication rate	Deletion	Insertion	Total	Replication rate
Replication set of TAD-SVs (17 samples, SV_allele >= 5/17)	1267	1787	34	57	91	40	80	120	14	24	38	0.3167	26	48	74	0.6167	34	67	101	0.8417
