# Supplementary material for: An integrative TAD catalog in lymphoblastoid cell lines discloses the functional impact of deletions and insertions in human genomes
Source: HighWire-hosted journal article supplement (doi:10.1101/gr.279419.124), 2024-12-01
Supplement: Supplemental_Table_S18.xlsx [file Supplemental_Table_S18.xlsx]

## Sheet: Table S19
Table S18. Summary statistics of genotypes verification for all the samples
#SEQ_ID	RG	CHIP_ID	#SNPS	#READS	AVG_DP	FREEMIX	FREELK1	FREELK0	FREE_RH	FREE_RA	CHIPMIX	CHIPLK1	CHIPLK0	CHIP_RH	CHIP_RA	DPREF	RDPHET	RDPALT
GM18534	ALL	GM18534	13345772	245407447	18.39	0.00496	3.50959e+07	35219402	NA	NA	0.0064	3.05865e+07	3.082e+07	NA	NA	18.495	0.9905	0.9633
GM18939	ALL	GM18939	13345772	239772482	17.97	0.00641	3.44107e+07	34610437	NA	NA	0.00831	2.97822e+07	3.01339e+07	NA	NA	18.089	0.9858	0.9601
GM19036	ALL	GM19036	13345772	224993476	16.86	0.00385	3.90468e+07	39124682	NA	NA	0.00552	3.45979e+07	3.47583e+07	NA	NA	16.99	0.9851	0.9563
GM19240	ALL	GM19240	13345772	231055682	17.31	0.00373	4.2862e+07	42927125	NA	NA	0.00461	3.80627e+07	3.81842e+07	NA	NA	17.404	0.9929	0.9671
GM19983	ALL	GM19983	13345772	182796020	13.7	0.0043	34289470	34348854	NA	NA	0.0051	2.99346e+07	3.00364e+07	NA	NA	13.78	0.9907	0.9617
GM19650	ALL	GM19650	13345772	250828008	18.79	0.0043	3.84872e+07	38578675	NA	NA	0.00477	3.39258e+07	3.40684e+07	NA	NA	18.866	0.9938	0.974
HG00096	ALL	HG00096	13345772	202989135	15.21	0.0037	3.06331e+07	30689538	NA	NA	0.00494	2.61067e+07	2.62288e+07	NA	NA	15.33	0.9839	0.9506
HG00171	ALL	HG00171	13345772	236854772	17.75	0.00408	3.53325e+07	35424112	NA	NA	0.00561	3.06721e+07	3.08552e+07	NA	NA	17.859	0.9877	0.9599
GM20509	ALL	GM20509	13345772	221431649	16.59	0.00466	3.34006e+07	33484717	NA	NA	0.00603	2.89245e+07	2.90951e+07	NA	NA	16.741	0.9816	0.9442
GM20847	ALL	GM20847	13345772	236953456	17.75	0.00444	36065594	36155335	NA	NA	0.00563	3.14608e+07	3.16346e+07	NA	NA	17.868	0.9881	0.9597
HG00733	ALL	HG00733	13345772	209041251	15.66	0.00372	3.16904e+07	31748582	NA	NA	0.00446	2.7436e+07	2.75416e+07	NA	NA	15.761	0.9875	0.9614
HG00864	ALL	HG00864	13345772	228993913	17.16	0.00383	3.29141e+07	32991069	NA	NA	0.00541	2.82235e+07	2.8394e+07	NA	NA	17.278	0.9856	0.9596
HG01573	ALL	HG01573	13345772	197995293	14.84	0.00306	2.73111e+07	27356851	NA	NA	0.0045	2.31206e+07	2.32323e+07	NA	NA	14.947	0.9849	0.9545
HG01505	ALL	HG01505	13345772	202469562	15.17	0.00429	3.09436e+07	31008113	NA	NA	0.00541	2.64895e+07	2.66216e+07	NA	NA	15.289	0.9822	0.9538
HG00514	ALL	HG00514	13345772	226101912	16.94	0.00395	31761007	31836075	NA	NA	0.00461	2.74522e+07	2.75827e+07	NA	NA	17.019	0.9929	0.9706
HG01114	ALL	HG01114	13345772	195872493	14.68	0.00756	3.0011e+07	30129984	NA	NA	0.00606	2.58677e+07	2.6006e+07	NA	NA	14.798	0.9832	0.9485
HG01596	ALL	HG01596	13345772	210046632	15.74	0.00312	3.03913e+07	30446622	NA	NA	0.00484	2.57168e+07	2.5848e+07	NA	NA	15.87	0.9825	0.9515
HG02011	ALL	HG02011	13345772	222282893	16.66	0.00377	4.20448e+07	42108336	NA	NA	0.00491	3.69866e+07	3.71072e+07	NA	NA	16.764	0.9887	0.9618
HG02492	ALL	HG02492	13345772	192165217	14.4	0.00398	2.97908e+07	29846531	NA	NA	0.00493	2.54458e+07	2.5555e+07	NA	NA	14.502	0.9857	0.9552
HG02587	ALL	HG02587	13345772	174410354	13.07	0.0044	3.37504e+07	33807429	NA	NA	0.0058	2.8537e+07	2.86602e+07	NA	NA	13.195	0.9842	0.9438
HG03065	ALL	HG03065	13345772	168724828	12.64	0.00462	3.4108e+07	34163268	NA	NA	0.00688	2.84274e+07	2.85766e+07	NA	NA	12.801	0.9773	0.9331
HG03009	ALL	HG03009	13345772	222976424	16.71	0.00384	3.40225e+07	34090272	NA	NA	0.00453	2.97174e+07	2.98296e+07	NA	NA	16.784	0.9925	0.9698
HG02018	ALL	HG02018	13345772	241084659	18.06	0.00672	33462787	33686430	NA	NA	0.00802	2.92651e+07	2.96192e+07	NA	NA	18.158	0.9896	0.9688
HG03371	ALL	HG03371	13345772	210067678	15.74	0.00426	40355965	40425024	NA	NA	0.00433	3.48398e+07	3.49437e+07	NA	NA	15.81	0.9953	0.9702
HG03683	ALL	HG03683	13345772	222961704	16.71	0.00413	3.38422e+07	33914456	NA	NA	0.0045	2.93729e+07	2.94906e+07	NA	NA	16.776	0.9943	0.9709
HG03732	ALL	HG03732	13345772	203895287	15.28	0.00383	3.12692e+07	31331716	NA	NA	0.00504	2.68087e+07	2.69362e+07	NA	NA	15.394	0.9851	0.9534
HG00512	ALL	HG00512	13345772	82872316	6.21	0.00379	1.34302e+07	13460163	NA	NA	0.00676	1.01657e+07	1.02463e+07	NA	NA	6.258	0.9827	0.9563
HG00513	ALL	HG00513	13345772	80369399	6.02	0.00337	1.30042e+07	13027817	NA	NA	0.00635	9.80284e+06	9.87386e+06	NA	NA	6.066	0.9843	0.9587
HG00731	ALL	HG00731	13345772	103099783	7.73	0.00632	1.78162e+07	17875244	NA	NA	0.00979	1.39928e+07	1.41549e+07	NA	NA	7.79	0.9828	0.9485
HG00732	ALL	HG00732	13345772	130328898	9.77	0.00375	2.1782e+07	21815174	NA	NA	0.00528	1.74418e+07	1.75256e+07	NA	NA	9.845	0.9816	0.9524
GM18505	ALL	GM18505	13345772	110677316	8.29	0.00585	2.19784e+07	22026499	NA	NA	0.0105	1.78437e+07	1.79925e+07	NA	NA	8.364	0.9825	0.9545
GM18486	ALL	GM18486	13345772	95491843	7.16	0.00446	1.85692e+07	18599835	NA	NA	0.00929	1.48935e+07	1.50038e+07	NA	NA	7.216	0.9847	0.9518
GM19238	ALL	GM19238	13345772	88620725	6.64	0.0033	1.84141e+07	18431760	NA	NA	0.00804	1.46416e+07	1.47189e+07	NA	NA	6.691	0.9897	0.9528
GM18508	ALL	GM18508	13345772	88614755	6.64	0.00536	1.77852e+07	17824365	NA	NA	0.01211	1.43131e+07	1.44559e+07	NA	NA	6.692	0.9858	0.9558
GM18507	ALL	GM18507	13345772	136390570	10.22	0.00471	2.5696e+07	25741412	NA	NA	0.0072	2.13371e+07	2.14532e+07	NA	NA	10.31	0.9817	0.9535
GM19239	ALL	GM19239	13345772	99367160	7.45	0.00482	2.08619e+07	20896113	NA	NA	0.00882	1.66312e+07	1.67382e+07	NA	NA	7.503	0.9884	0.9542
GM18516	ALL	GM18516	13345772	88783778	6.65	0.0049	17611942	17646421	NA	NA	0.01204	1.40769e+07	1.42237e+07	NA	NA	6.706	0.9834	0.9572
GM18522	ALL	GM18522	13345772	70684790	5.3	0.00515	1.3935e+07	13967521	NA	NA	0.01471	1.1136e+07	1.12934e+07	NA	NA	5.339	0.9856	0.9539
GM19099	ALL	GM19099	13345772	107533220	8.06	0.00556	2.07825e+07	20830579	NA	NA	0.00983	1.67482e+07	1.68915e+07	NA	NA	8.126	0.9835	0.9533
GM19141	ALL	GM19141	13345772	99649027	7.47	0.00473	1.96262e+07	19658523	NA	NA	0.01002	1.57071e+07	1.58308e+07	NA	NA	7.524	0.9852	0.9571
GM19204	ALL	GM19204	13345772	152518159	11.43	0.1244	3.45463e+07	36882806	NA	NA	0.17628	3.07871e+07	3.69411e+07	NA	NA	11.52	0.9828	0.9576
